# Supplementary material for: Monoamine Oxidase-Dependent Pro-Survival Signaling in Diabetic Hearts Is Mediated by miRNAs
Source: MDPI journal article supplement (doi:10.3390/cells11172697), 2022-08-30
Supplement: s1 [file s1]

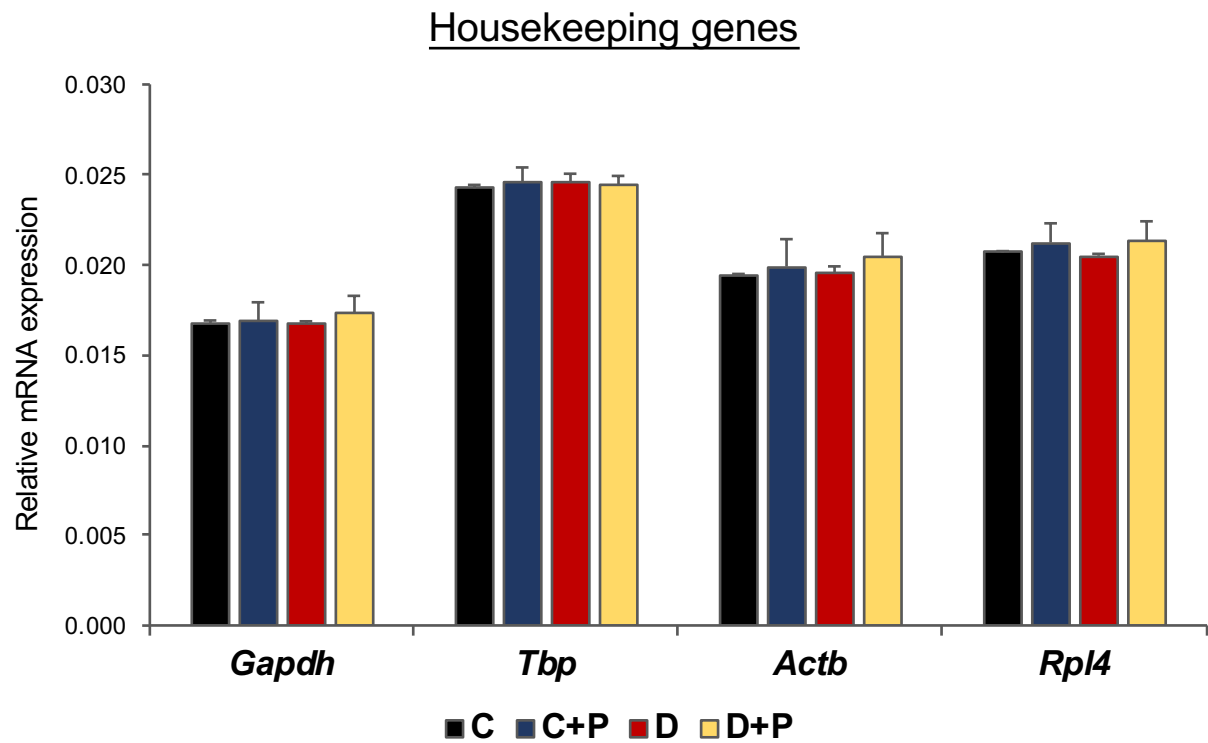

**Supplementary Figure S1.** Evaluation of the expression stability of housekeeping genes for qRT-PCR analyses.

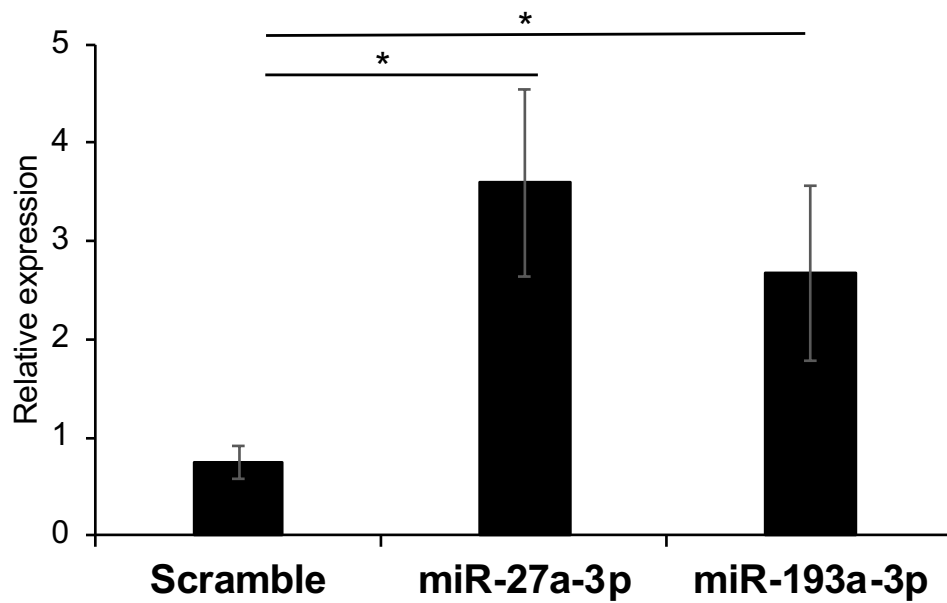

**Supplementary Figure S2.** MiR-27a-3p and -193a-3p levels following their overexpression. \* $p < 0.05$  vs Scramble.

**A**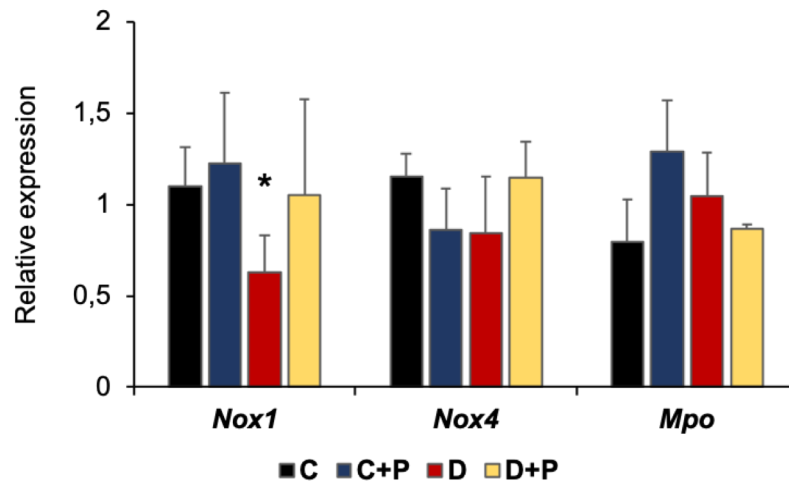**B**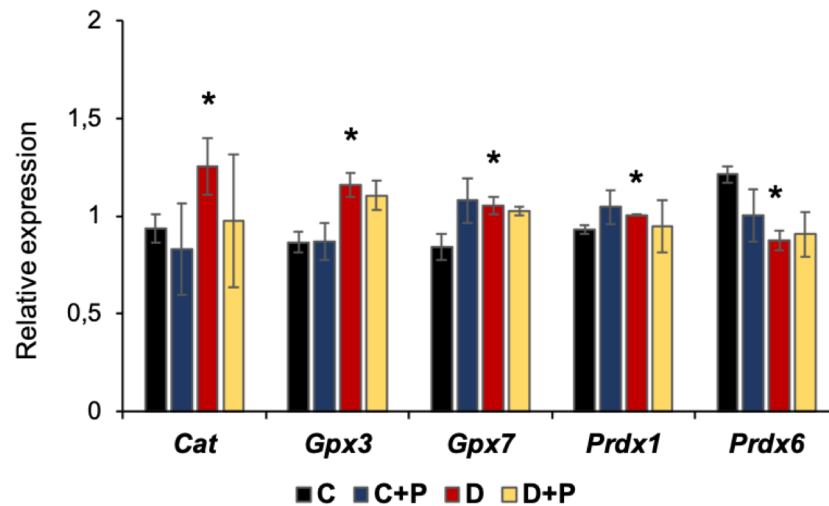**C**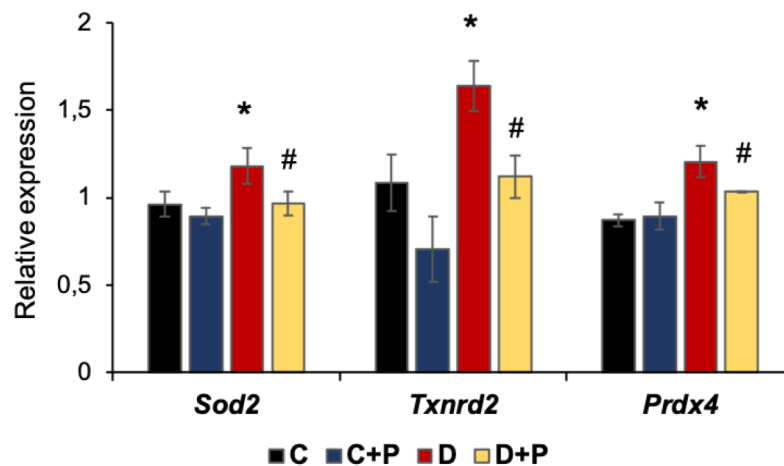

**Supplementary Figure S3. (A).** Gene expression of enzymes involved in ROS production, i.e. NADPH oxidase 1 (*Nox1*), NADPH oxidase 4 (*Nox4*), and myeloperoxidase (*Mpo*). **(B).** Gene expression of antioxidant enzymes catalase (*Cat*), glutathione peroxidase 3 (*Gpx3*), glutathione peroxidase 7 (*Gpx7*), peroxiredoxin 1 (*Prdx1*) and peroxiredoxin 6 (*Prdx6*). **(C).** Relative expression of superoxide dismutase 2 (*Sod2*), thioredoxin reductase 2 (*Txnrd2*) and peroxiredoxin 4 (*Prdx4*). \* $p \leq 0.05$  vs C, # $p \leq 0.05$  vs D.
