# Supplementary material for: Monoamine Oxidase-Dependent Pro-Survival Signaling in Diabetic Hearts Is Mediated by miRNAs
Source: Cells. 2022 Aug 30;11(17):2697. doi: 10.3390/cells11172697 (PMC9454570; doi:10.3390/cells11172697)
Supplement: Supplementary file 1 [file cells-11-02697-s001.zip]

Archive with 10 entries (10 files):
- 1.List of Primers Supplementary Table S1 .xlsx
- 2.Primers-to-clone-UTR-Supplementary Table S2.xlsx
- 3.SOTA-clusters-Supplementary-Table S3.xlsx
- 4.Pathways altered-Supplementary Table S4.xlsx
- 5.DE-Genes-Supplementary Table S5.xlsx
- 6.Enrichment-of-615-genes-Supplementary Table S6.xlsx
- 7.Restored-cluster with-pargylin-Supplementary Table S7.xlsx
- 8.bar_table_WP-BP_q0.01p0.005_padj_Supplementary Table S8.xlsx
- 9.bar_table_WP-BP_q0.01p0.005_pval_unnamed-Supplementary Table S9.xlsx
- Supplementary Figures final-.pdf
