# Supplementary material for: Monoamine Oxidase-Dependent Pro-Survival Signaling in Diabetic Hearts Is Mediated by miRNAs
Source: Cells. 2022 Aug 30;11(17):2697. doi: 10.3390/cells11172697 (PMC9454570; doi:10.3390/cells11172697)
Supplement: Supplementary file 1 [file cells-11-02697-s001.zip › 1.List of Primers Supplementary Table S1 .xlsx]

## Sheet: Primers
List of primers
	Target Genes		Parameters of primers amplification efficiency
	Gene	Primer sequence	Primer concentration (nM)	R2	Tm (°C)	Efficiency
1	ANP	F-5’ GTGCGGTGTCCAACACAGAT 3’ R-5’ TCCAATCCTGTCAATCCTACCC 3’	500	0.98	62	0.95
2	PDK4	F-5’ AGGGAGGTCGAGCTGTTCTC 3’ R-5’GGAGTGTTCACTAAGCGGTCA 3’	500	0.98	84.6	0.82
3	PRDX4	F-5’ CTCAAACTGACTGACTATCGTGG 3’ R-5’ CGATCCCCAAAAGCGATGATTTC 3’	500	0.99	75.7	1.01
4	TXNIP	F-5’CCTGTGAAGGGTTGTGGTTG 3’ R-5’CCATCAGCTCGCAGACATTC 3’	500	1	83.6	1.01
5	ANGPTL4	F-5’ ACAGTGACTTTGGTTGTGGC 3’ R-5’ CTCGAGCCCATGTTTTCTGG 3’	500	0.98	81.8	0.97
6	RGS2	F-5’ ACCTGCCCACTGAGAAATCA 3’ R-5’ GCTGTTTGGCCCTGTAACTT 3’	250	0.99	76	0.86
7	GAPDH	F-5’ CATGGCCTTCCGTGTTCCTA 3’ R-5’ GCTTCACCACCTTCTTGAT 3’	500	0.99	80.7	0.86	Housekeeping
8	TBP	F-5’ AAGGGAGAATCATGGACCAG 3’ R-5’ CCGTAAGGCATCATTGGACT 3’	250	0.99	80.6	0.84
9	ACTB	F-5’ GGCTGTATTCCCCTCCATCG 3’ R-5’ CCAGTTGGTAACAATGCCATGT 3’	500	0.99	82.4	0.84
10	RPL4	F-5’ GCCCAGAAATCCAAAGAGCC 3’ R-5’ GCCTGGCGAAGAATGGTATT 3’	500	0.99	79.5	0.9
11	INPP4A	F-5' CAGGCATCCCTCTCCATAAG 3'	250	0.98	59.6	0.98
		R-5' CCCCTTAGCAGAGCACATCT 3'
12	ELK1	F-5' CCATGACAGCCACGAATATG 3'	250	0.97	59.9	0.97
		R-5' GCCATCATTTTGCCTCTCTC 3'
13	RPS6KA2	F-5' AGCATAGCCTGTCCCTCTCA 3'	250	0.95	60	1.01
		R-5' ATTTGGCGAGAGTAGGCTGA 3'
14	MAPK10	F-5' TGGTCAGTCAAAGCGAAGTG 3'	250	0.96	59.9	1.02
		R-5' GGTCCCACATGAGCAAGAAT 3'
15	GRB10	F-5' CCTTGCCGAAGTGAATTGTT 3'	250	0.97	60.1	0.99
		R-5' GGGCCACTGAAGTCTGCTAC 3'
