# Supplementary material for: Monoamine Oxidase-Dependent Pro-Survival Signaling in Diabetic Hearts Is Mediated by miRNAs
Source: Cells. 2022 Aug 30;11(17):2697. doi: 10.3390/cells11172697 (PMC9454570; doi:10.3390/cells11172697)
Supplement: Supplementary file 1 [file cells-11-02697-s001.zip › 2.Primers-to-clone-UTR-Supplementary Table S2.xlsx]

## Sheet: Sheet1
Primer Name	Sequence	Notes	Cloned Sequence
Igf1r-For	CTCGGAGCTCCCATCTGCCACCTCCTTC	In violet the binding site for SacI enzyme. Blue nucleotides before the restriction site were added for a correct restriction	CCATCTGCCACCTCCTTCACAAGCAGGCCCACCTGTCTTTAGAACCAGCTTGTCTGAAGGGGTGGCCTCCCTGGGAGCAAGATGTAAGACACCAACTCCCCATGGCCAGGAGCAGCAACTTTAGTGGGTGTGCTATAAAGCCCACTCCCGGGCCGGAAATCCCAAAGTGGAGTAGAGCTGACCCTACAGTGGCCCTAGAGCCCCTTGCTGTTCCTCCTTAACCAGAATCCCGGACCTCTGGGCTTGGAGGCCCCTCCCCCTGGAGTGGGGTTGGGGGAGGGGTCCTGTCTTGTTTCGATTTAGCACTTCTTACCAGAGCAGTGACAGCGCGAGAGATGCTTCTGGGTGGAAATATTTAAATTAGGAGTAGGAAAACTGTTGGATGATGATGGTTGCAGT
Igf1r-Rev	CTCGTCTAGAACTGCAACCATCATCATCCA	In red the binding site for XbaI enxyme. Nucleotides in blue before the restriction site were added for a correct restriction
Igf1r-Ctrl-For	CTCGGAGCTCAGTCACCATGAGCACAGCAC	In violet the binding site for SacI enzyme. Blue nucleotides before the restriction site were added for a correct restriction	AGTCACCATGAGCACAGCACGCCAGTGGAGGGGGGCTCCCCGGCCCATCCTCAGCTGGCTGACTTTGGAACAGAACTTTCTCTACAGATTGAATGACTGACAAATTCTATCCCTAAGAGAGCAGGTACTCCCAGGTTTTGAGGGCAGGAGGCACCCACACGTAGGTTGTCTTGAGAGTCCCAATGTGTGCACA
Igf1r-Ctrl-Rev	CTCGTCTAGATGTGCACACATTGGGACTCT	In red the binding site for XbaI enxyme. Nucleotides in blue before the restriction site were added for a correct restriction
Mapk10-For	CTCGGAGCTCTCTGTAGAAAGGGAGAGGGTGT	In violet the binding site for SacI enzyme. Blue nucleotides before the restriction site were added for a correct restriction	TCTGTAGAAAGGGAGAGGGTGTATTTTTTTGCTGGTTAGGGAGTGTTTGGTGGGTCAGTGTGATCATTTTTTCCAATGGGATACATTGACCTTATAGCCCAATTTTTTTCTTGTGCAATAAAGATGGAAACTAATACTTCATCTCTCAGAATCCATCATTAGAGCTTCATAGGTCTTTATCCCAGGGCTGGACTAGGATGTAGCCAAGTCTTAGCAGTTGGAGGAAACATGCTCACTTGATGGCTCAGTGGTAGCGTGGCTGGCTTCTCTCAGTCAGTTATCACTACCAGAACGAGTATCATATAAAGGCACCGATAACAGCTGACCAGTAGATGAGAGAGACTTGGTCATGGAGCATAGAACAAACTGAATGCATGAACAAGACATCATTCTGTGATC…
Mapk10-Rev	CTCGTCTAGAGAGGACAAATGGTGGCAAAT	In red the binding site for XbaI enxyme. Nucleotides in blue before the restriction site were added for a correct restriction
Mapk10-Ctrl-For	CTCGGAGCTCTGGGTGAAGCATCCACTACA	In violet the binding site for SacI enzyme. Blue nucleotides before the restriction site were added for a correct restriction	TGGGTGAAGCATCCACTACAGTTATTTGCACTCTGGCCACTTTGGTGCTCACCCCTGTGGTGATATTTCACCTGAGGAAAAGTGGAACGTGTGAGCAGATGAAGGTAATGGGCCTGGCAGATGGGAAAGCCTTGACTACAGAGGAAACAGCAATGCCGGGGCTCTGCAAACTGCCTTAAACCCAA
Mapk10-Ctrl-Rev	CTCGTCTAGATTGGGTTTAAGGCAGTTTGC	In red the binding site for XbaI enxyme. Nucleotides in blue before the restriction site were added for a correct restriction
Grb10-For	CTCGGAGCTCGACAACAACGGTGGTGAACA	In violet the binding site for SacI enzyme. Blue nucleotides before the restriction site were added for a correct restriction	GACAACAACGGTGGTGAACACATTTCCCTTTCTTGATACCACCCAGAAAGTCTGCTACATACCTGAGTTAGCCACTAGATTGCCTGTCCCGACTCATTGAAGTGCTCCCCAGGGAGCCACTTCTGATTTGCCATGGTTGACAGCATAGTGGAAGATAGATATGACAGCGCTTTGTAAAGCAGGCCAGTGGCAAGCTGGCCCACAGTAGAGAAACACTGTAGTTCACAGACCATGCAACCGTGTTTCCACGAGATGTTATTACAACAAATGAAGAATTTTTTTCCTTTTTTTTCATTTTAATCTTTTTTGACTTTTTTTTAGTTAACCATTTTTTATGCATAAGTGCTCAAATGCATTTCTCTTTCTTTCGAAAC
Grb10-Rev	CTCGTCTAGAGTTTCGAAAGAAAGAGAAATGC	In red the binding site for XbaI enxyme. Nucleotides in blue before the restriction site were added for a correct restriction
Grb10-Ctrl-For	CTCGGAGCTCCCTTGCCGAAGTGAATTGTT	In violet the binding site for SacI enzyme. Blue nucleotides before the restriction site were added for a correct restriction	CCTTGCCGAAGTGAATTGTTGAAGGCTGCAACCCACCCACCTTGAGTGTAGCAGACTTCAGTGGCCCCGAGATCGCCAGCCCTTTGCACAGGCAGCTGGGAATTCCACCTGAAACAGCTGGTCCCTAGGTTAGCGGGTTCCCAGCCCCCCTAATCAGAGACTGAAGGACAATTGACTTTTATTTTTGTATTTAATTGACATGAATGTAAAGGGGACAGCTCAGG
Grb10-Ctrl-Rev	CTCGTCTAGACCTGAGCTGTCCCCTTTACA	In red the binding site for XbaI enxyme. Nucleotides in blue before the restriction site were added for a correct restriction
Inpp4a-For	CTCGGAGCTCTGTGGGTCCCTGTAGTGTCA	In violet the binding site for SacI enzyme. Blue nucleotides before the restriction site were added for a correct restriction	TGTGGGTCCCTGTAGTGTCACATAAGATTCTTCAAGAAGACCTGAAGGATTGGCTTTTATTTTTGTGTTTTTAAAGACACGTCACTGAAGAGTGTATGGAGCATGATTTTGTGCTGGAATCTGTAGGGTCACATGTGGGTCAATAGCGTGGATAGTAATGGCTGCTCTCAACACCAGCTTTCAGCTGTCACTGTACCGTTAATGTCATAGTTCCTAGATGCCAGCTAGGTCTGCTAAAACTCCAGCAGACTTTTCAAATATCCACTTAGCCCTGCTCACCCCGTTTATTTTTCTATTCAGTAACTCACAGGTGAGCATTGACTTAAACTCTGCTTTAAAAAGGACTGAATATAAAACAGGAAGTACCTACCCCCTTACACTTCAGG
Inpp4a-Rev	CTCGTCTAGACCTGAAGTGTAAGGGGGTAGG	In red the binding site for XbaI enxyme. Nucleotides in blue before the restriction site were added for a correct restriction
Inpp4a-Ctrl-For	CTCGGAGCTCTCTCAGTGTGGCTGGTTGAG	In violet the binding site for SacI enzyme. Blue nucleotides before the restriction site were added for a correct restriction	TCTCAGTGTGGCTGGTTGAGCCTTTTAACTCTTGGTTGGTTCATTTACTCTTAGTCTTTTGTTTTTTGTTTGTTTGGTTTTGCTCATTTTGACATCACTGCCTTTTAGAAATATTTCTTCAGGTTTTAGAATTAAATGTTTCCCACGTTCTCCAG
Inpp4a-Ctrl-Rev	CTCGTCTAGACTGGAGAACGTGGGAAACAT	In red the binding site for XbaI enxyme. Nucleotides in blue before the restriction site were added for a correct restriction
Elk1-For	CTCGGAGCTCGGGACATGGAGCCTGTCTTA	In violet the binding site for SacI enzyme. Blue nucleotides before the restriction site were added for a correct restriction	GGGACATGGAGCCTGTCTTATATCAATCTAGGCTGGAGGAGGTGGATCAAAAGACTCCCAGGCTCACCTCCTGTCAGCACTGGCCCAGACCAGGCCTGAAGACCTGGGGGTTGGTGATTTGGGGGACGGTGCTATACTCGTCTCCACTACTTGTTTTGCTTCCCCAAAATGGACCTTTTTTTCTAAGAGTCCCAGAGAATGGGGAATTGTTCCTGTAAATATATATTTTTAAAGGTGTTGCTGAAAGCTGTTGGTATTTTTTTTTCTCCTGTGTCACCAAAATAAGCCATGACAGCCACGAATATGAAGAACAATAAGGGCGAGGCAAAGATTGACTGTGAGAGAGGCAAAATGATGGCATATGTCAGAGACTGATACAGACTGCTGATTGGTAACCAG…
Elk1-Rev	CTCGTCTAGATGGCTCACACAATCAGCTTC	In red the binding site for XbaI enxyme. Nucleotides in blue before the restriction site were added for a correct restriction
Elk1-Ctrl-For	CTCGGAGCTCAGCGGCCAGAAGTTTGTCTA	In violet the binding site for SacI enzyme. Blue nucleotides before the restriction site were added for a correct restriction	AGCGGCCAGAAGTTTGTCTACAAGTTTGTGTCCTACCCAGAGGTTGCAGGGTGCTCCACTGAAGACTGCCCACCCCAGCCTGAGGTGTCTGTAACCTCGGCCATAGCCATGGCCCCTGCTACTGTCCATGCAGGCCCAGGGGACACTGCCACTGGAAAGCCAGGAACACCAAAGGGTGCAGGAATGACAG
Elk1-Ctrl-Rev	CTCGTCTAGACTGTCATTCCTGCACCCTTT	In red the binding site for XbaI enxyme. Nucleotides in blue before the restriction site were added for a correct restriction
Rps6ka2-For	CTCGGAGCTCGTGCTCCACTCCTCCTGGT	In violet the binding site for SacI enzyme and in blue nucleotides added for a correct restriction	GTGCTCCACTCCTCCTGGTCGGAGAGGAGGGACTTGTGTGTCCTGAAGTCTCTCTGGAGGCTGCTGAGGATAGTGGACTCAGGTCAGAAGACACTCCACTGTGGCTCAGAACCTGCCAGTCTGAGAAGCAGCCCCTCTGCCCAGTAGAGGCACCTGTAGGAGGCGCCTGTTGGTCACAGCAGGCTTACACTAGGAAGACCACAGGTGGACCACGGCTGCTTCTGCAATGCCTGCCC
Rps6ka2-Rev	CTCGTCTAGAGGGCAGGCATTGCAGAAG	In red the binding site for XbaI enxyme and in blue nucleotides added for a correct restriction
Rps6ka2-Ctrl-For	CTCGGAGCTCTCAGCCTACTCTCGCCAAAT	In violet the binding site for SacI enzyme and in blue nucleotides added for a correct restriction	TCAGCCTACTCTCGCCAAATAGATGGAGGAGACCATCAGTCAAAACAAACGCATCCTTGAAGTGTCTGGAAGGATGCTCAGCCTTGCCCTGCAGAGAGTGGAGTACCCCACATTCCCACCTCACCCAGTACTTGATACTTGAAATCTCTCGTGGAGTCAGCCAGAGGAGCACGTGACAGGAT
Rps6ka2-Ctrl-Rev	CTCGTCTAGAATCCTGTCACGTGCTCCTCT	In red the binding site for XbaI enxyme and in blue nucleotides added for a correct restriction
