# Supplementary material for: Monoamine Oxidase-Dependent Pro-Survival Signaling in Diabetic Hearts Is Mediated by miRNAs
Source: Cells. 2022 Aug 30;11(17):2697. doi: 10.3390/cells11172697 (PMC9454570; doi:10.3390/cells11172697)
Supplement: Supplementary file 1 [file cells-11-02697-s001.zip › 3.SOTA-clusters-Supplementary-Table S3.xlsx]

## Sheet: SOTA-cluster1
Original row	Original row	FEATURES	FeatureNum	Row	Col	accessions	chr_coord	SubTypeMask	SubTypeName	Start	Sequence	ProbeUID	ControlType	ProbeName	GeneName	SystematicName	Description	GroupA mean	GroupA std.dev.	GroupB mean	GroupB std.dev.	Absolute t value	Degrees of freedom	Raw p value	Adj p value	False Discovery Rate	Diab+Parg-24	Diab+Parg-22	Diab+Parg-19	Ctrl+Parg-10	Ctrl+Parg-8	Ctrl+Parg-6	Diab-18	Diab-12	Diab-11	Ctrl-5	Ctrl-4	Ctrl-2
14	85	DATA	159	1	159	ref|NM_145437|ens|ENSMUST00000045075|gb|BC019814|gb|AK028662	mm|chr11:114843855-114843796	0	NA	2341	GTTCTAGGTCAGTCTGCTTTACAGAGTGAGTTATAGGACTACACAGAGAAATCCAAAAAA	313	0	A_55_P1983523	Cd300ld	NM_145437	ref|Mus musculus CD300 molecule-like family member d (Cd300ld), mRNA [NM_145437]	1.2989	0.164247	1.0061	0.0523752	2.94172	2	0	0	0	1.1729	0.769452	0.978817	1.1809	1.22932	1.48649	0.734062	0.683387	0.746371	1.04324	1.02888	0.946197
17	95	DATA	195	2	31	ref|NM_011630|ens|ENSMUST00000146175|ens|ENSMUST00000113460|ref|XM_006505904	mm|chr6:92117787-92117846	0	NA	2354	CCTGCCCTAAGAAATGTTTTAACACCTTTTGGTGATGCAGATTTTGGAACAATCTTTTAA	58	0	A_55_P1970841	Nr2c2	NM_011630	ref|Mus musculus nuclear receptor subfamily 2, group C, member 2 (Nr2c2), mRNA [NM_011630]	0.93264	0.0794518	1.1432	0.0709374	3.42403	3	0	0	0	1.11835	1.02626	0.850724	0.840958	0.981386	0.975576	0.995107	1.02304	0.759001	1.12293	1.0846	1.22207
25	132	Mean	268	2	104	ref|NM_024218|ens|ENSMUST00000117563|ens|ENSMUST00000134617|ens|ENSMUST00000023269	mm|chr16:55970228-55970287	0	NA	491	TGCCAAGGAAGCAAAAAAGGCTAAGCAGGCATCAAAGAAGACAGCAATGGCTGCTGCCAA	204	0	A_55_P2004333	Rpl24	NM_024218	ref|Mus musculus ribosomal protein L24 (Rpl24), mRNA [NM_024218]	1.0691	0.0336162	1.02069	0.0213808	2.10476	3	0	0	0	1.0069	0.950442	0.967441	1.04755	1.05191	1.10783	1.0165	0.973635	0.815719	0.999283	1.04204	1.02073
33	207	Mean	443	3	115	ref|XM_011251191|ref|XR_379934|ref|XR_406087|gb|BC058114	mm|chr16:55971494-55971553	0	NA	493	GGAAACGCTAGTGTGGTAGAGCAGAGTTGGAAATAAAGCTCTATCTTTAACTCTAAAAAA	540	0	A_55_P2059556	LOC102641064	XM_011251191	ref|PREDICTED: Mus musculus 60S ribosomal protein L24-like (LOC102641064), mRNA [XM_011251191]	1.12574	0.0319801	1.01628	0.0699049	2.46627	2	0	0	0	0.984615	1.07619	0.83356	1.11844	1.16073	1.09803	1.05048	0.90585	0.723267	1.08762	1.01332	0.947899
37	220	DATA	469	3	141	ref|NM_026531|ref|NM_001162939|ens|ENSMUST00000107425|ens|ENSMUST00000107421	mm|chr7:86053197-86053256	0	NA	2057	TTACTGGGAGAAGTCAGCTTGCTCATAGTACCAGACCATCGGCATAGGAATAAAGTGCAT	590	0	A_55_P2141860	Aen	NM_026531	ref|Mus musculus apoptosis enhancing nuclease (Aen), transcript variant 1, mRNA [NM_026531]	1.12561	0.10864	0.93164	0.0401252	2.90093	2	0	0	0	1.27673	0.944838	0.951559	1.25094	1.05836	1.06752	1.01058	0.831682	0.812863	0.975143	0.923697	0.89608
42	252	DATA	543	4	51	ref|NM_001146043|ens|ENSMUST00000161825|gb|AK161797|tc|TC1712084	mm|chr13:97951090-97951149	0	NA	4420	CTTCATGAAACCTTGGATGTTTGGATTTGATGCCCTTAAATAAAACAGTGACTGAAATGT	416	0	A_55_P2316335	Gfm2	NM_001146043	ref|Mus musculus G elongation factor, mitochondrial 2 (Gfm2), transcript variant 2, mRNA [NM_001146043]	0.931677	0.0819613	1.18788	0.0948812	3.53934	3	0	0	0	1.22796	0.939708	0.792631	1.00261	0.841953	0.950462	0.993397	0.812118	0.875509	1.07854	1.2485	1.23661
67	409	DATA	918	6	98	ref|NM_028037|ens|ENSMUST00000137789|ens|ENSMUST00000111770|ens|ENSMUST00000031412	mm|chr5:122071303-122071244	0	NA	3355	CTGATGAAGTACACCAGCTGACAGTGGCTAAGATGGAACTGAAGAATCAGTCCAGGATGC	823	0	A_51_P187507	Acad10	NM_028037	ref|Mus musculus acyl-Coenzyme A dehydrogenase family, member 10 (Acad10), mRNA [NM_028037]	1.03846	0.0132794	0.92403	0.0649548	2.9894	2	0	0	0	2.12217	1.17619	0.646409	1.0521	1.02557	1.03771	0.678107	1.18293	0.306726	0.998816	0.891583	0.881692
86	489	Mean	1117	7	133	ref|NM_011986|ens|ENSMUST00000030637	mm|chr4:126421054-126420995	0	NA	3640	CAAGTTCAAAGCTGTGCACATGTGGACACTCAATAAATGTTTATTGGTGATGAGAAGCCT	1207	0	A_55_P1998545	Ncdn	NM_011986	ref|Mus musculus neurochondrin (Ncdn), mRNA [NM_011986]	1.02564	0.0503828	1.13296	0.0214916	3.39348	2	0	0	0	1.19364	0.925399	0.852976	1.01226	0.983296	1.08136	0.96435	0.974612	0.613236	1.15062	1.10903	1.13921
92	565	DATA	1286	8	138	ref|NM_153152|ens|ENSMUST00000052832|gb|BC056164|gb|AK075942	mm|chr17:56748350-56748291	0	NA	228	GAAGGCCGAGGAGGTTGTGCCACCAGCAATGTACCAGTTCAGCCAATATGTGTGCCAGCA	1217	0	A_51_P353386	2410015M20Rik	NM_153152	ref|Mus musculus RIKEN cDNA 2410015M20 gene (2410015M20Rik), mRNA [NM_153152]	1.08313	0.118241	0.909265	0.05512	2.30841	2	0	0	0	1.39231	0.906004	0.859499	1.10536	0.955355	1.18868	1.13222	0.957133	0.775648	0.95491	0.848029	0.924855
105	643	DATA	1474	9	162	ref|NM_134135|ens|ENSMUST00000117276|ens|ENSMUST00000059551|ens|ENSMUST00000168076	mm|chr10:80491344-80491285	0	NA	3402	CAGCCAGGGTTGCAAGTGGGCCCTTTTGCAAAATAAATAAACAAGTGAAGATTTAAACTA	1585	0	A_55_P2020143	Slc39a3	NM_134135	ref|Mus musculus solute carrier family 39 (zinc transporter), member 3 (Slc39a3), mRNA [NM_134135]	1.1798	0.202134	0.924551	0.0370402	2.1514	2	0	0	0	0.948106	0.939392	1.15357	1.01887	1.11388	1.40667	1.01527	0.879051	0.751551	0.9536	0.937213	0.882841
134	823	Mean	1859	12	55	ref|NM_011296|ens|ENSMUST00000119199|ens|ENSMUST00000080443|ens|ENSMUST00000077163	mm|chr17:34089202-34089041	0	NA	367	AAATTCGAGCCCATAGAGGGCTGCGCCACTTTTGTGGCCTTCTTGTCCGAGGTCAGCACA	1697	0	A_55_P2135632	Rps18	NM_011296	ref|Mus musculus ribosomal protein S18 (Rps18), mRNA [NM_011296]	1.10213	0.0814461	0.891657	0.0456737	3.90405	3	0	0	0	1.2288	1.15626	0.95605	1.05522	1.19618	1.055	1.05166	0.856038	0.769831	0.892744	0.845449	0.936777
139	842	DATA	1903	12	99	ens|ENSMUST00000124348|gb|AK168693|tc|TC1618184|riken|I920045N07	mm|chr4:102816633-102816692	0	NA	1522	TTTCTACCGTTTTTAGGTGGGTTATAGAAAGACTGTGTATGAGTTCATAAACAGTGCGGC	1780	0	A_65_P03200	Mier1	ENSMUST00000124348	ens|mesoderm induction early response 1 homolog (Xenopus laevis [Source:MGI Symbol;Acc:MGI:1918398] [ENSMUST00000124348]	1.36554	0.151975	1.04639	0.114473	2.90535	3	0	0	0	1.24849	1.14471	0.569999	1.41928	1.48334	1.19399	0.400404	0.936399	0.464222	0.92436	1.1514	1.0634
140	844	DATA	1906	12	102	ref|NM_021454|ens|ENSMUST00000076831|ref|XM_006540250|ref|XM_006540249	mm|chr7:4102973-4102914	0	NA	755	TGCTGACCTCCAGCTGGACGACGTCATCGGTCTGTAGTGTCATAATTCCCTCAACCCCTC	1786	0	A_55_P2057686	Cdc42ep5	NM_021454	ref|Mus musculus CDC42 effector protein (Rho GTPase binding) 5 (Cdc42ep5), mRNA [NM_021454]	1.13666	0.239921	0.904473	0.0382421	1.6553	2	0	0	0	1.09181	0.986575	1.03574	1.01133	0.985359	1.41329	1.09297	1.11845	0.551058	0.860335	0.927685	0.9254
172	1018	DATA	2287	14	155	ref|NM_001029993|ref|NM_001029994|ens|ENSMUST00000177123|ens|ENSMUST00000017622	mm|chr8:124940482-124940541	0	NA	3025	ACATTGTCACGGCGAGAGGAGCTCCTTAAACAGCTCAAAGCGGTTGAGGACGCCATCGCT	2198	0	A_51_P121359	Zc3h18	NM_001029993	ref|Mus musculus zinc finger CCCH-type containing 18 (Zc3h18), transcript variant 1, mRNA [NM_001029993]	1.22419	0.122771	1.02639	0.032027	2.70024	2	0	0	0	0.459719	1.05041	1.11178	1.2073	1.11074	1.35453	0.927733	0.881074	0.817566	1.00796	1.06337	1.00783
188	1095	DATA	2483	16	23	ref|NM_146118|ref|NM_001164357|ref|NM_001164358|ref|NM_001290558	mm|chr2:32270334-32270275	0	NA	3014	GAGGATTTCTTTATTTTGCCCTTTGGAACGACAAGGCAGTGAGGTGCTTCACCAGGAATT	2258	0	A_51_P193173	Slc25a25	NM_146118	ref|Mus musculus solute carrier family 25 (mitochondrial carrier, phosphate carrier), member 25 (Slc25a25), transcript variant 1, mRNA [NM_146118]	1.69301	0.346362	0.861547	0.0910006	4.02142	2	0	0	0	0.73334	0.631796	1.02747	1.33112	2.02142	1.72649	0.743781	0.756421	0.443515	0.795927	0.965432	0.823283
210	1215	DATA	2754	17	130	ref|NM_029846|ref|NM_001205392|ref|NM_001205391|ens|ENSMUST00000113186	mm|chr1:89688896-89688955	0	NA	3024	AAGTTGAGATTCGCTGGCCAGGGCACATCTTTTATTTATTTAATTATGTGTCCCAACAGA	2773	0	A_51_P440694	Atg16l1	NM_029846	ref|Mus musculus autophagy related 16-like 1 (S. cerevisiae) (Atg16l1), transcript variant 2, mRNA [NM_029846]	1.09987	0.0892533	0.981354	0.0148017	2.26896	2	0	0	0	1.0383	0.906798	0.943993	1.14548	0.99703	1.15711	0.910371	0.950419	1.00645	0.979415	0.99703	0.967617
214	1236	DATA	2819	18	31	ref|NM_001114663|ens|ENSMUST00000042986|gb|BC046582|tc|TC1617791	mm|chr1:55809685-55809744	0	NA	5110	TGAAACTTTGCAAACTTAATCATCCTCTACAGCTACCGCGTTAGTGCTGACTGCTCTTAA	2585	0	A_55_P2513525	Plcl1	NM_001114663	ref|Mus musculus phospholipase C-like 1 (Plcl1), mRNA [NM_001114663]	1.16592	0.0800157	1.02265	0.0765605	2.24072	3	0	0	0	1.02118	0.821656	0.850796	1.07604	1.19231	1.2294	0.742347	0.901421	1.09689	1.07547	0.934848	1.05764
237	1364	DATA	3108	19	156	ref|NM_028451|ens|ENSMUST00000071487|ens|ENSMUST00000178636|ref|XM_006534334	mm|chr11:57872862-57872921	0	NA	3942	GAGACGCTGCTCACACCAGAAGAGACTATTGAAAGATGATTCATTTTATTTTTTCTCTGA	3130	0	A_65_P04602	Larp1	NM_028451	ref|Mus musculus La ribonucleoprotein domain family, member 1 (Larp1), mRNA [NM_028451]	1.20672	0.0432892	0.995406	0.0942178	3.52986	2	0	0	0	0.695707	0.918486	1.06675	1.17358	1.19088	1.25569	0.931982	0.891684	0.889023	0.921622	1.10154	0.96306
239	1384	DATA	3157	20	41	ref|NM_177192|ens|ENSMUST00000111557|ref|XM_006507062|ref|XM_006507063	mm|chr6:148936684-148936625	0	NA	9739	CAGACAAACTGACATGGGTTTTCAGGTTTTGGAGTACATTTAAATATGACTTTTCATGCT	2918	0	A_55_P2081585	Dennd5b	NM_177192	ref|Mus musculus DENN/MADD domain containing 5B (Dennd5b), mRNA [NM_177192]	1.25555	0.105846	0.978676	0.0635611	3.88418	3	0	0	0	0.951727	0.830191	1.01996	1.20433	1.18505	1.37726	0.876602	0.925025	0.693822	0.905317	1.0134	1.01732
253	1460	DATA	3326	21	46	gb|AK137811|gb|AK087984|tc|TC1599645|riken|A130015C10	mm|chr10:57882243-57882302	0	NA	1813	CTTCAAACAAGAGAACTAGTCTCACTAAAGGAGGAATCATATATTTTAAGCTTTTGCCAC	3226	0	A_52_P206836	AK137811	AK137811	gb|Mus musculus 16 days neonate thymus cDNA, RIKEN full-length enriched library, clone:A130015C10 product:LIM and senescent cell antigen-like domains 1, full insert sequence. [AK137811]	1.65444	0.417995	1.03382	0.0440641	2.55747	2	0	0	0	0.946076	0.663381	0.882065	1.92881	1.86113	1.17336	0.684813	0.758553	0.000338	1.08453	1.01206	1.00487
278	1577	DATA	3584	22	140	ref|NM_008361|ens|ENSMUST00000028881|ref|XM_006498795|gb|BC013644	mm|chr2:129190406-129190347	0	NA	1236	AGGTTCCTATAATATGGATGAGAATTTTTATGAATGAAGCACCAGCACATTGCTTTGATG	3398	0	A_51_P212782	Il1b	NM_008361	ref|Mus musculus interleukin 1 beta (Il1b), mRNA [NM_008361]	2.7243	0.460458	0.000593	0	10.2455	2	0	0	0	1.01074	0.742991	0.46679	2.42806	3.25479	2.49006	0.896628	0.707571	0.000593	0.000593	0.000593	0.000593
281	1597	DATA	3639	23	31	gb|BC011338|tc|TC1589149	mm|chr9:7856221-7856162	0	NA	2559	ACAGATAATGCCCAGCTAATAGAACAGGGTCTGAAGGAGAACGTGAAGAGACAACTGTCT	3500	0	A_52_P434055	Birc3	BC011338	gb|Mus musculus baculoviral IAP repeat-containing 3, mRNA (cDNA clone MGC:18386 IMAGE:3661563), complete cds. [BC011338]	1.78452	0.648969	1.09775	0.0764925	1.82032	2	0	0	0	1.16276	0.782471	0.838089	2.51253	1.26669	1.57433	0.000417	0.569038	0.000417	1.05152	1.18605	1.05569
282	1603	DATA	3652	23	44	ref|NM_198005|ref|NM_001165981|ens|ENSMUST00000102701|ens|ENSMUST00000064141	mm|chr2:70922580-70924643	0	NA	1329	AAACCAAGTCAAAGTCTTGAAGCTAAGTGAGGTAGAAAATGATAGTTCTCAGCATCAGAT	3525	0	A_52_P633269	Dcaf17	NM_198005	ref|Mus musculus DDB1 and CUL4 associated factor 17 (Dcaf17), transcript variant 3, mRNA [NM_198005]	1.76422	0.382476	1.04022	0.285784	2.62647	3	0	0	0	1.24333	0.690849	1.02985	1.45664	1.64356	2.19248	0.000406	0.621832	0.000406	0.917862	0.835988	1.36681
288	1633	DATA	3729	23	121	ref|NM_020491|ens|ENSMUST00000160141|ens|ENSMUST00000025885|gb|AK011957	mm|chr19:5730387-5730328	0	NA	619	GAAACAGCTGGATCACTGAGACTTCTATCCTGATCCCTGTTCCCCTGAGAAAAACCCTCC	3662	0	A_55_P2903910	Sssca1	NM_020491	ref|Mus musculus Sjogren's syndrome/scleroderma autoantigen 1 homolog (human) (Sssca1), mRNA [NM_020491]	1.20942	0.163995	0.915468	0.0457607	2.99036	2	0	0	0	0.866275	0.934904	1.0864	1.13272	1.09783	1.39771	1.02593	0.880823	0.831009	0.957869	0.866961	0.921574
297	1720	DATA	3913	24	141	ref|NM_019983|ref|NM_001199059|ens|ENSMUST00000026390|ens|ENSMUST00000119797	mm|chr5:130690147-130690206	0	NA	2748	TCCTTTCCCTGTTTATCCAATAAACTTCCCCCACAGTGCTGTGGGGCTATTGCCTTTTTT	3701	0	A_55_P2129975	Rabgef1	NM_019983	ref|Mus musculus RAB guanine nucleotide exchange factor (GEF) 1 (Rabgef1), transcript variant 1, mRNA [NM_019983]	1.20058	0.241217	0.843912	0.0361644	2.53273	2	0	0	0	1.46303	0.792196	0.848986	0.972669	1.17587	1.4532	0.999357	0.889122	0.873832	0.885572	0.825574	0.820591
321	1837	DATA	4173	26	73	ref|NM_026408|ref|NM_001199154|ref|NM_001199151|ref|NM_001199153	mm|chr18:53075430-53075489	0	NA	3397	CTCAGCTCATTGAGGCCAGGTCACTGGTTTTATTTTCTGTCCAGAGTGTTTCTCTGTCAT	3880	0	A_52_P59264	Sncaip	NM_026408	ref|Mus musculus synuclein, alpha interacting protein (synphilin) (Sncaip), transcript variant 2, mRNA [NM_026408]	1.16343	0.0513031	0.881731	0.0352558	7.83808	3	0	0	0	1.13608	1.24359	0.837913	1.22226	1.14	1.12803	0.952391	0.912346	0.782197	0.914522	0.844442	0.886229
340	1915	DATA	4372	27	108	ref|NM_031165|ens|ENSMUST00000127699|ens|ENSMUST00000140984|ens|ENSMUST00000117405	mm|chr9:40610620-40610679	0	NA	405	GGGGAGACAAAAAGTTTCTACCCAGAGGAAGTGTCCTCCATGGTTCTGACAAAGATGAAG	4242	0	A_66_P137434	Hspa8	NM_031165	ref|Mus musculus heat shock protein 8 (Hspa8), mRNA [NM_031165]	1.22029	0.144528	0.911953	0.0477329	3.50871	2	0	0	0	0.840801	0.940224	1.15033	1.2046	1.08424	1.37202	0.956169	0.828766	0.88699	0.946397	0.931995	0.857466
344	1935	DATA	4407	27	143	ref|NM_013589|ens|ENSMUST00000002073|ens|ENSMUST00000110254|ref|XM_006515501	mm|chr12:86124226-86124167	0	NA	6538	AAATGCACTTCCATACAAGCTAGCTGGGGGTTCAGGAGCATGGGGGAATAAAATGTTCAT	4307	0	A_55_P1970105	Ltbp2	NM_013589	ref|Mus musculus latent transforming growth factor beta binding protein 2 (Ltbp2), mRNA [NM_013589]	1.44611	0.178754	0.913252	0.0697074	4.81035	2	0	0	0	0.951228	0.553553	1.13423	1.47496	1.25469	1.60868	0.898791	0.682222	0.701891	0.913954	0.982605	0.843196
345	1941	DATA	4424	27	160	ref|NM_175171|ens|ENSMUST00000167058|ref|XM_006517693|ref|XM_006517694	mm|chr13:103525147-103525088	0	NA	8091	TTCGTGGTTCGGCAGAGAAGGGGCAAGGAGACCTTAAGGAGCAGTCCTCACAAAAAGGCC	4341	0	A_55_P2053551	Mast4	NM_175171	ref|Mus musculus microtubule associated serine/threonine kinase family member 4 (Mast4), mRNA [NM_175171]	1.25239	0.147893	0.894622	0.0882728	3.59791	3	0	0	0	0.614899	1.15523	1.17274	1.2298	1.1171	1.41029	0.882382	0.799623	0.934071	0.893398	0.9835	0.806967
349	1957	DATA	4462	28	34	ref|NM_198100|ens|ENSMUST00000118375|ens|ENSMUST00000107615|ens|ENSMUST00000066078	mm|chr11:96997757-96997698	0	NA	3062	CTCGGCCAGCCGATGGCAGTGAACGCCACTGTCCATCGAATGTGCCATTCTGATCCAAAT	4101	0	A_52_P417846	Tbkbp1	NM_198100	ref|Mus musculus TBK1 binding protein 1 (Tbkbp1), mRNA [NM_198100]	1.27901	0.111566	0.984799	0.0919783	3.5243	3	0	0	0	1.10798	1.10122	0.882541	1.40382	1.24425	1.18896	0.856984	0.838627	0.421225	0.883519	1.06313	1.00775
359	2002	DATA	4572	28	144	ref|NM_001039352|ref|NM_001039353|ref|NM_053086|ref|NM_001039351	mm|chr19:46158875-46158934	0	NA	2506	GTTGTCAATTGCCTTCCTGTTCTGTGGGTCTTCATACTGAGAGATTTGTATATTTTATAT	4310	0	A_55_P1956847	Nolc1	NM_001039352	ref|Mus musculus nucleolar and coiled-body phosphoprotein 1 (Nolc1), transcript variant 3, mRNA [NM_001039352]	1.06626	0.11107	0.931966	0.0264825	2.03719	2	0	0	0	1.1221	0.947719	1.01696	0.997595	1.00679	1.19441	0.968881	0.948541	1.00111	0.962525	0.915714	0.917659
379	2131	DATA	4854	30	98	gb|AK171865|riken|F830015I20	mm|chr13:3593028-3592969	0	NA	1381	ATCTATGTACTACAACTTTGTGTTTGGACCATGTATTCCCAACATGGTATTGACCCTGAG	4528	0	A_65_P15385	Fam208b	AK171865	gb|Mus musculus activated spleen cDNA, RIKEN full-length enriched library, clone:F830015I20 product:hypothetical protein, full insert sequence. [AK171865]	1.24768	0.00767972	1.15196	0.0897634	1.84024	2	0	0	0	1.10802	1.08331	0.751195	1.2416	1.25631	1.24513	0.393015	0.922018	0.543537	1.04977	1.18805	1.21806
386	2175	DATA	4956	31	36	ref|NM_008306|ens|ENSMUST00000169273|ref|XM_006525669|ref|XM_006525670	mm|chr18:60848316-60848257	0	NA	3385	ACATACGACTCTGTATTTGGGTTATTATTATCACATCTCATCTCCTCTTTGGGAAAAGAC	4720	0	A_52_P135469	Ndst1	NM_008306	ref|Mus musculus N-deacetylase/N-sulfotransferase (heparan glucosaminyl) 1 (Ndst1), mRNA [NM_008306]	1.58158	0.472328	0.930769	0.0616812	2.36645	2	0	0	0	1.02018	0.911348	1.10483	1.19333	1.44398	2.10742	0.00066	1.42529	0.00066	0.95752	0.97456	0.860229
401	2279	DATA	5176	32	92	ref|NM_145426|ref|NM_180599|ens|ENSMUST00000020830|ens|ENSMUST00000108849	mm|chr11:57347231-57347290	0	NA	4775	CCCTGTCACACAAAAGGGAATGAGTGTTGTTTGATAGTACTTGTATCTCAACAATTATTT	4826	0	A_55_P2062787	Mfap3	NM_145426	ref|Mus musculus microfibrillar-associated protein 3 (Mfap3), transcript variant 1, mRNA [NM_145426]	0.983394	0.0979414	1.19286	0.0269799	3.57132	2	0	0	0	0.968587	0.969425	0.726676	1.05963	1.01762	0.872933	1.06801	1.12983	0.608706	1.22003	1.16608	1.19248
410	2349	DATA	5352	33	104	ref|NM_008231|ens|ENSMUST00000005017|ens|ENSMUST00000161616|ens|ENSMUST00000160198	mm|chr3:87710635-87717070	0	NA	392	GGATTGATGAGATGCCTGAGGCTGCAGTGAAGTCAACAGCCAACAAATACCAAGTCTTTT	5144	0	A_52_P339791	Hdgf	NM_008231	ref|Mus musculus hepatoma-derived growth factor (Hdgf), mRNA [NM_008231]	1.30545	0.190534	0.937708	0.105527	2.92442	3	0	0	0	0.810239	0.935461	1.17731	1.2797	1.12911	1.50756	0.973298	0.916164	0.45804	1.00566	0.991331	0.816137
439	2495	DATA	5698	35	122	ref|NM_017464|ref|NM_001111324|ens|ENSMUST00000021794|ens|ENSMUST00000163623	mm|chr13:41405881-41405822	0	NA	3787	TTCCTTTATGACCAACTCAAGAAATATAGTAGTCTCTGATCTATTTCATTCCAGCCTACT	5486	0	A_52_P491544	Nedd9	NM_017464	ref|Mus musculus neural precursor cell expressed, developmentally down-regulated gene 9 (Nedd9), transcript variant 2, mRNA [NM_017464]	1.38265	0.323678	0.820113	0.0872896	2.90639	2	0	0	0	1.05184	0.84868	1.01529	1.08856	1.32994	1.72945	0.92118	0.983892	0.570823	0.770981	0.768463	0.920896
450	2562	DATA	5845	36	105	ref|NM_054085|ens|ENSMUST00000107348|gb|AF338872|gb|AK052268	mm|chr7:88250126-88250185	0	NA	5996	GCCAGGGATTAACTCTAGGTGCCTTATACTCTGTTCTGAAAGGAGTGAGGTTGCAGTAAA	5458	0	A_51_P211305	Alpk3	NM_054085	ref|Mus musculus alpha-kinase 3 (Alpk3), mRNA [NM_054085]	1.16966	0.156285	1.02616	0.0221414	1.57471	2	0	0	0	0.832726	0.840172	1.05882	1.04743	1.11581	1.34575	0.952461	0.943091	0.785268	1.04186	1.00083	1.03578
475	2805	DATA	6425	40	29	ref|NM_133850|ref|NM_001195390|ens|ENSMUST00000147822|ens|ENSMUST00000071852	mm|chr2:153444752-153444693	0	NA	1126	TCTGTGTAAAAGCCTGTGCTTAGTCTTCTCTGGAAAGAACTGAGGCCAGACGATTTCTGT	5926	0	A_52_P646705	Commd7	NM_133850	ref|Mus musculus COMM domain containing 7 (Commd7), transcript variant 1, mRNA [NM_133850]	1.13835	0.119136	1.00308	0.0226427	1.93203	2	0	0	0	1.08001	0.893452	0.872436	1.03095	1.11761	1.26649	1.044	1.04966	0.636167	0.996518	0.984442	1.02828
483	2844	DATA	6515	40	119	ref|NM_145384|ens|ENSMUST00000172747|ens|ENSMUST00000053862|ens|ENSMUST00000139840	mm|chr4:138854668-138854609	0	NA	1298	TCAGACAGATCTGGAGTTGGCTTGTGCTGCACAGGGGCATACCTCTCAGGTGTATGACAG	6094	0	A_51_P306892	Pqlc2	NM_145384	ref|Mus musculus PQ loop repeat containing 2 (Pqlc2), mRNA [NM_145384]	1.20388	0.149239	0.972763	0.0800317	2.36383	3	0	0	0	1.01904	0.729103	1.11506	1.17491	1.07124	1.36547	0.975056	0.981631	0.650194	1.05977	0.902286	0.956234
509	3014	DATA	6924	43	36	ens|ENSMUST00000148999|gb|AK165422|gb|AK165425|tc|TC1642381	mm|chr13:6601859-6601800	0	NA	1513	GGACTATACCAAATACTGATTTGAGTGTTAAGGGTTACCTTCCACTTAGGAACCCTGCCC	6542	0	A_65_P04184	Pfkp	ENSMUST00000148999	ens|phosphofructokinase, platelet [Source:MGI Symbol;Acc:MGI:1891833] [ENSMUST00000148999]	1.68288	0.113157	1.03014	0.212549	4.69521	3	0	0	0	0.920537	1.14158	1.04924	1.55281	1.73707	1.75874	0.00025	0.749102	0.00025	0.932731	1.27393	0.883749
531	3140	DATA	7284	45	68	ref|NM_019727|ens|ENSMUST00000139872|ens|ENSMUST00000034946|gb|AK149850	mm|chr9:65945250-65944426	0	NA	804	TTCTTCCGCAGAGTTTCTTGAGAAACGGAGGGCTGCTTTGGAAAGGTACCTTCAAAGAAT	6899	0	A_55_P2589657	Snx1	NM_019727	ref|Mus musculus sorting nexin 1 (Snx1), mRNA [NM_019727]	1.2211	0.0981969	0.962521	0.17026	2.27867	3	0	0	0	1.09338	1.02434	1.01267	1.13427	1.32767	1.20135	0.74582	1.1276	0.445334	0.980304	1.12319	0.784067
548	3218	DATA	7465	46	85	ref|NM_010292|ref|NM_001287386|ens|ENSMUST00000109823|ens|ENSMUST00000102920	mm|chr11:5800992-5800933	0	NA	2560	ACATCAGTGATCCGGGAAGAGAAGCAAGCCACCCACAGCATCTCTCCAGGAAACCACCCA	6931	0	A_55_P2121956	Gck	NM_010292	ref|Mus musculus glucokinase (Gck), transcript variant 1, mRNA [NM_010292]	1.72918	0.573818	1.01764	0.0302108	2.14479	2	0	0	0	0.646533	0.461613	0.97299	2.38586	1.47726	1.32441	0.589417	0.460805	0.628194	1.01258	1.05006	0.990279
552	3237	DATA	7504	46	124	ref|NM_023912|ens|ENSMUST00000025890|ref|XM_006531856|ref|XM_006531857	mm|chr19:5758540-5758481	0	NA	2523	CCACTGGAGAGCAGGCCCGGCGGATGTATTTATTGTACAAACCATGTGAGCCTGGTCAGC	7007	0	A_51_P498023	Scyl1	NM_023912	ref|Mus musculus SCY1-like 1 (S. cerevisiae) (Scyl1), mRNA [NM_023912]	1.10461	0.0963887	0.944217	0.0557339	2.49511	3	0	0	0	1.0377	0.940801	1.02839	1.03557	1.06353	1.21473	0.913647	0.932548	1.00043	0.983927	0.880503	0.968221
553	3246	DATA	7523	46	143	gb|DQ059756	mm|chr1:73441963-73441904	0	NA	905	TAATGCAGGACTTTAAAAAGTCCCTCCCGTTTCCAAAATGAACAGTTTGTCTTGAAAAAA	7042	0	A_55_P2744664	Pinc	DQ059756	gb|Mus musculus pregnancy-induced noncoding RNA mRNA, complete sequence. [DQ059756]	1.66884	0.291802	0.878287	0.247466	3.57884	3	0	0	0	1.5029	1.09731	0.838245	1.41215	1.60818	1.98621	0.000396	0.594032	0.325727	0.820754	0.664655	1.14945
613	3570	DATA	8395	52	31	ref|NM_001304785|ref|NM_001304784|ref|NM_008233|ens|ENSMUST00000002911	mm|chr17:56238453-56238613	0	NA	1638	TCAGATTCTTCAGAAGAACACAGATGTGGTAGCAACGCTGAAGAAGATTCGCCGGTACAA	7719	0	A_55_P2745170	Hdgfrp2	NM_001304785	ref|Mus musculus hepatoma-derived growth factor, related protein 2 (Hdgfrp2), transcript variant 3, mRNA [NM_001304785]	1.22141	0.160315	0.978876	0.0919721	2.27283	3	0	0	0	1.15564	0.575358	0.784773	1.38686	1.21058	1.06678	1.09067	1.17403	0.618689	1.03668	0.872819	1.02713
629	3669	DATA	8628	53	100	ref|NM_009931|ens|ENSMUST00000033898|ref|XR_378656|gb|AK146487	mm|chr8:11199068-11199009	0	NA	5969	TTTTCGTCTCTGGAGAAACTGTACTATCCTTTCACAGGGTTACCAACATCAGGCCACTGA	8141	0	A_51_P124254	Col4a1	NM_009931	ref|Mus musculus collagen, type IV, alpha 1 (Col4a1), mRNA [NM_009931]	1.31817	0.0908084	1.04449	0.119286	3.16194	3	0	0	0	0.794076	0.947019	0.798855	1.2203	1.3345	1.3997	0.873278	1.04329	0.455518	0.95214	1.00215	1.17916
644	3747	DATA	8817	54	125	ref|NM_032008|ens|ENSMUST00000038522|ens|ENSMUST00000102956|ref|XM_006519724	mm|chr14:27241973-27241914	0	NA	2395	GGATGCAGCTGACCTAAAAACTCTCCTCAGTAAGGCTGAAAACCAAGCAAAGGATGTACA	8185	0	A_51_P487623	Slmap	NM_032008	ref|Mus musculus sarcolemma associated protein (Slmap), mRNA [NM_032008]	1.24566	0.115197	0.961636	0.139577	2.71826	3	0	0	0	0.795029	0.868903	1.0436	1.28155	1.11679	1.33864	0.952711	0.790976	0.926906	0.979086	1.09167	0.814154
646	3778	DATA	8881	55	25	ref|XM_011250513|ref|XM_006539829|gb|AK146784|gb|AK122565	mm|chr7:20010518-20010459	0	NA	3605	AATACATGTATTCAATAAACAATCAACGACTGGTGCCGACTCCACGCTAGGCCCAGTTCT	8299	0	A_55_P2142580	Mark4	XM_011250513	ref|PREDICTED: Mus musculus MAP/microtubule affinity-regulating kinase 4 (Mark4), transcript variant X2, mRNA [XM_011250513]	1.19708	0.0913929	1.03809	0.0985183	2.04918	3	0	0	0	0.953793	0.937226	0.868267	1.1341	1.15523	1.3019	0.864453	0.922659	0.748105	1.09127	1.09859	0.924409
647	3788	DATA	8909	55	53	ref|NM_023596|ens|ENSMUST00000150845|ens|ENSMUST00000117513|ref|XM_006514118	mm|chr10:60178522-60178463	0	NA	1537	GACAGGGTAAGCCAAGGTCTCGAGGTGTTAAGCAAGGGGTTGACATTTTGTTTGATGCAG	8344	0	A_51_P185465	Slc29a3	NM_023596	ref|Mus musculus solute carrier family 29 (nucleoside transporters), member 3 (Slc29a3), mRNA [NM_023596]	1.13208	0.0682952	0.9903	0.0325848	3.24532	2	0	0	0	0.94375	0.935969	1.01305	1.2091	1.10826	1.07889	1.1585	0.845448	0.736141	0.982933	0.96203	1.02594
659	3842	DATA	9045	56	25	gb|BC011192	mm|chr7:123475172-123475113	0	NA	1169	TCCAGTCACCAAGAGAGTTGATGGGTCCTGAAGTCTGGTACTAATCCCAGTTTCTCTTTT	8300	0	A_52_P646112	Rps13	BC011192	gb|Mus musculus ribosomal protein S13, mRNA (cDNA clone MGC:18694 IMAGE:4016679), complete cds. [BC011192]	1.44213	0.0604819	0.891886	0.152531	5.80833	2	0	0	0	1.19813	1.28376	0.686201	1.37491	1.49214	1.45935	0.575742	0.802992	0.451115	0.901478	1.0394	0.734786
664	3881	DATA	9124	56	104	ref|NM_001081237|ens|ENSMUST00000036003|gb|AK129335|gb|BC011326	mm|chr6:147060976-147061035	0	NA	6246	CTGGCAAAGCAAAGGAAAATGTGATTTGTTGTATCACTTCAGGGTGCGACATTTCTCTGT	8439	0	A_52_P93066	Klhl42	NM_001081237	ref|Mus musculus kelch-like 42 (Klhl42), mRNA [NM_001081237]	1.14508	0.276656	0.86986	0.0575325	1.68699	2	0	0	0	0.926894	1.94896	0.820217	0.940798	1.03453	1.45992	0.814703	0.925935	0.518464	0.833402	0.936183	0.839994
668	3928	DATA	9224	57	40	ref|NM_001277255|ref|NM_001277259|ref|NM_009612|ref|NM_001277257	mm|chr15:100974010-100974069	0	NA	1905	TGTGCCTGCTCAGCTTGGCTCCCAGCCCATCCAGCCAAAAATACAGCTGAGCTGAAATTC	8621	0	A_55_P2011380	Acvrl1	NM_001277255	ref|Mus musculus activin A receptor, type II-like 1 (Acvrl1), transcript variant 5, mRNA [NM_001277255]	1.21647	0.131703	0.987577	0.0280065	2.94433	2	0	0	0	0.787013	0.907668	1.12271	1.26817	1.06676	1.31447	0.894856	0.753687	0.921939	0.995726	1.01061	0.9564
683	4026	DATA	9474	58	126	ref|NM_009228|ens|ENSMUST00000109728|ens|ENSMUST00000028991|gb|AK137379	mm|chr2:154202210-154202151	0	NA	1954	TCTGCAGCTGGAGTCTTCTGGGTCAGTGGCAAGAGGAAGAAGAGGAGCCTTTCTGTTCAC	8768	0	A_51_P339232	Snta1	NM_009228	ref|Mus musculus syntrophin, acidic 1 (Snta1), mRNA [NM_009228]	1.16624	0.119532	0.885973	0.0302759	3.93679	2	0	0	0	0.964335	0.934684	1.01428	1.28978	1.05117	1.15777	0.965394	0.918095	1.04658	0.879973	0.918801	0.859147
694	4096	DATA	9643	59	131	ref|NM_001081636|ref|NM_001081635|ref|NM_007632|ens|ENSMUST00000183177	mm|chr17:47736579-47736638	0	NA	2059	CAAGGTTTGGGCTGGTGGCCCATTTCTATCCTGCTGCCTTAATAAAGATTTCAGAATAAA	9067	0	A_55_P2041075	Ccnd3	NM_001081636	ref|Mus musculus cyclin D3 (Ccnd3), transcript variant 3, mRNA [NM_001081636]	1.12187	0.0516033	0.956836	0.0506576	3.95288	3	0	0	0	0.881344	0.915417	1.04136	1.16345	1.06411	1.13804	1.02426	0.936127	0.965384	1.01523	0.930588	0.924688
698	4150	DATA	9771	60	95	ref|NM_028193|ens|ENSMUST00000011302|ref|XM_011244183|ref|XM_011244184	mm|chr12:114200638-114199978	0	NA	1982	AAAGAGCAACTACCAGAAATAGTGCTGATCCTGGGACAAGCACAGGGAAGAGGTTGAGGC	9007	0	A_52_P592111	Brf1	NM_028193	ref|Mus musculus BRF1 homolog, subunit of RNA polymerase III transcription initiation factor IIIB (S. cerevisiae) (Brf1), mRNA [NM_028193]	1.27152	0.11956	1.00112	0.043672	3.67953	2	0	0	0	1.07291	0.889079	0.800713	1.30996	1.36713	1.13747	0.898935	0.975325	0.545127	1.01327	0.952655	1.03742
704	4185	DATA	9875	61	35	ref|NM_010266|ens|ENSMUST00000087600|ref|XM_006526680|gb|BC076583	mm|chr19:21465882-21465823	0	NA	5331	CTGTATGATTTTGCTTATTGTTAATGTACTGGGTGAGCTCCTTTGTGCATCAGGAAAAAA	9190	0	A_55_P2097478	Gda	NM_010266	ref|Mus musculus guanine deaminase (Gda), mRNA [NM_010266]	1.22958	0.101857	0.979241	0.0927714	3.14717	3	0	0	0	0.85486	0.97641	0.857054	1.34607	1.18535	1.1573	0.858056	0.984138	0.843029	0.917639	1.08594	0.934144
712	4209	DATA	9931	61	91	ref|NM_025977|ref|NM_001164614|ens|ENSMUST00000170304|ens|ENSMUST00000006403	mm|chr9:21740250-21740309	0	NA	1464	TGGGACTGCTTGCCCTGAAGATCCCTCCAGAGAGAAAATAAACTAGCTGAGACCTTTCTC	9289	0	A_51_P378934	Ccdc159	NM_025977	ref|Mus musculus coiled-coil domain containing 159 (Ccdc159), transcript variant 2, mRNA [NM_025977]	1.22549	0.0746204	1.08095	0.0424505	2.91629	3	0	0	0	0.798306	0.835014	0.882614	1.23639	1.14603	1.29407	0.97257	0.999193	0.592981	1.12021	1.0359	1.08673
720	4251	DATA	10057	62	53	ref|NM_198027|ens|ENSMUST00000132193|ens|ENSMUST00000060834|ens|ENSMUST00000135882	mm|chr7:31099185-31099244	0	NA	807	TCCTGCTGAGCAAGTGACCACCAGGTTCTAAGACCTTGGAACCCTAGGGCAGAGGTAGCT	9222	0	A_51_P468762	Alkbh6	NM_198027	ref|Mus musculus alkB, alkylation repair homolog 6 (E. coli) (Alkbh6), mRNA [NM_198027]	1.02916	0.0378723	0.947843	0.0558571	2.087	3	0	0	0	1.21056	1.11505	0.974684	1.04017	0.987001	1.0603	1.11488	0.994985	0.658836	0.9839	0.976128	0.883502
734	4361	DATA	10326	63	158	gb|AK031795|gb|AV324847|tc|TC1615607|riken|6230428O10	mm|chr5:20530466-20530407	0	NA	1378	GTGTCAGAGCACTAGCAAACATGTAACCATTTTAGTGCCTGAAAAATTTTTAGAGATAGT	9710	0	A_55_P2312654	BB070754	AK031795	gb|Mus musculus 11 days embryo head cDNA, RIKEN full-length enriched library, clone:6230428O10 product:unclassifiable, full insert sequence. [AK031795]	1.84212	0.381607	0.963653	0.0676795	3.92595	2	0	0	0	0.474409	0.901271	0.64135	2.16152	1.94531	1.41953	0.000317	0.564483	1.00085	1.01934	0.888327	0.983288
735	4377	DATA	10361	64	29	ref|NM_001025246|ens|ENSMUST00000090554|ens|ENSMUST00000127173|ens|ENSMUST00000111266	mm|chr2:93041816-93041875	0	NA	2563	CTGTCATGGTCACTATTTATTCTTGGTCCCTTTTTCTTTTTGTAAGAAACAGTCACAAGA	9474	0	A_55_P1955632	Trp53i11	NM_001025246	ref|Mus musculus transformation related protein 53 inducible protein 11 (Trp53i11), mRNA [NM_001025246]	1.31378	0.11944	0.988889	0.104046	3.55246	3	0	0	0	0.665826	0.931206	1.0842	1.27244	1.44839	1.22049	0.931933	0.749948	0.728889	0.945171	0.913835	1.10766
748	4487	DATA	10598	65	102	ref|NM_025403|ens|ENSMUST00000028553|gb|AK004120|gb|BC028497	mm|chr2:112102712-112102771	0	NA	394	TATCTCACTCACCACGTGAATGAGTCTATACTGATGGGCCTCGCCTGTAAAAGGAACAAT	9905	0	A_52_P490863	Nop10	NM_025403	ref|Mus musculus NOP10 ribonucleoprotein (Nop10), mRNA [NM_025403]	1.22764	0.289637	0.910978	0.032295	1.88197	2	0	0	0	0.953325	1.00926	1.13806	0.988084	1.1453	1.54953	1.01561	0.956677	0.511228	0.94362	0.910273	0.879042
771	4651	DATA	11028	68	40	ref|NM_013807|ens|ENSMUST00000147730|ens|ENSMUST00000126135|ens|ENSMUST00000076859	mm|chr4:116801376-116801317	0	NA	2250	GCTCCCAGCTAGGGGGCATTATTTATGGACCACTTTTATTTATTAACAGACATTTATTTA	10094	0	A_51_P375201	Plk3	NM_013807	ref|Mus musculus polo-like kinase 3 (Plk3), mRNA [NM_013807]	1.79566	0.583216	0.83349	0.0544017	2.84512	2	0	0	0	0.578601	0.58151	0.976401	2.17646	2.08628	1.12423	0.499836	0.655523	0.820681	0.890945	0.826757	0.782769
772	4652	DATA	11030	68	42	ens|ENSMUST00000129311|gb|BC083148|tc|TC1628579|nap|NAP056807-1	mm|chr8:125628690-125628749	0	NA	1514	TTAATAAATTCACCAGAATGTGCCTTACAGAGGTTGTGGCTCTAATTTTATAATATATAT	10098	0	A_52_P103513	Rpl13	ENSMUST00000129311	ens|ribosomal protein L13 [Source:MGI Symbol;Acc:MGI:105922] [ENSMUST00000129311]	1.41765	0.0652011	1.01552	0.0355852	9.37678	3	0	0	0	1.39892	0.800025	0.457332	1.48428	1.35398	1.41468	0.000246	1.10392	0.940049	1.03524	1.03688	0.974441
801	4850	DATA	11506	71	26	ref|NM_145409|ens|ENSMUST00000168914|ens|ENSMUST00000170575|ens|ENSMUST00000048054	mm|chr17:25856037-25855978	0	NA	3043	CAGAGACACCCGGAGAAGTCTATTTATAAAGTCACACCTTACAGAGAGTGTGGGTCAGGC	10675	0	A_51_P208680	Chtf18	NM_145409	ref|Mus musculus CTF18, chromosome transmission fidelity factor 18 (Chtf18), mRNA [NM_145409]	1.24983	0.085838	1.00899	0.106151	3.0558	3	0	0	0	0.991709	1.02132	0.691111	1.18938	1.21204	1.34808	0.761144	0.740821	1.01744	1.12417	0.987688	0.915098
814	4947	DATA	11743	72	99	ref|NM_001037913|ens|ENSMUST00000107922|ens|ENSMUST00000030181|ref|XM_006538138	mm|chr4:43508719-43508778	0	NA	739	ACAAGACGGTGACAAAGGGTCCAGCAGTAAATGGGGAACAACCACTGAAGGTTTAGTAAA	10809	0	A_66_P100565	Ccdc107	NM_001037913	ref|Mus musculus coiled-coil domain containing 107 (Ccdc107), mRNA [NM_001037913]	1.27786	0.122027	1.02221	0.15491	2.24546	3	0	0	0	0.92088	0.960669	0.924911	1.17376	1.24768	1.41215	0.93057	0.836416	0.52634	1.04633	1.16364	0.856653
820	4980	DATA	11807	72	163	ref|NM_146151|ens|ENSMUST00000106456|ens|ENSMUST00000045542|ref|XM_011240492	mm|chr4:116476471-116476530	0	NA	2649	GCTCTATGTATGTGTCAACAGGTGATACAACCCTTTAGTTAATGGTTTATACTTGGACTG	10926	0	A_51_P186735	Tesk2	NM_146151	ref|Mus musculus testis-specific kinase 2 (Tesk2), mRNA [NM_146151]	1.35229	0.220952	0.965948	0.0268546	3.00643	2	0	0	0	0.351777	0.973788	1.1129	1.33065	1.14296	1.58327	0.680489	1.11917	0.807161	0.996943	0.951268	0.949634
849	5096	DATA	12075	74	103	ref|NM_009119|ens|ENSMUST00000128764|ens|ENSMUST00000135680|ref|XR_879904	mm|chr14:58422230-58422289	0	NA	1870	GACTCCCTCTTCTGGAGTGTCTGAAGACAGCTCCAGTGTACTTACATATATTAATAAAAT	11110	0	A_65_P07137	Sap18	NM_009119	ref|Mus musculus Sin3-associated polypeptide 18 (Sap18), mRNA [NM_009119]	1.18116	0.0489755	1.05237	0.0267584	3.99696	3	0	0	0	1.09966	1.13596	0.89203	1.12468	1.21186	1.20694	0.794232	0.89601	0.481505	1.04072	1.08298	1.03342
854	5124	DATA	12152	75	16	ref|NM_001083919|ref|NM_001024618|ens|ENSMUST00000028410|ens|ENSMUST00000112347	mm|chr2:67363002-67363061	0	NA	10309	ATGCGCATGAAAACCCTACAGCAGATACCCTCTTGCTTGGGGATCTTACTACCCACCCAG	11250	0	A_66_P138154	Xirp2	NM_001083919	ref|Mus musculus xin actin-binding repeat containing 2 (Xirp2), transcript variant 2, mRNA [NM_001083919]	1.18669	0.0560252	1.02679	0.105676	2.31553	3	0	0	0	0.830988	0.975086	1.14438	1.15222	1.15651	1.25134	1.021	0.816803	0.571295	0.942982	1.1455	0.991885
860	5139	DATA	12185	75	49	ref|NM_001033202|ref|XM_011248156|gb|AK144578|gb|AK078164	mm|chr5:114572874-114572933	0	NA	2730	TGACGGCACTGACGTACCTAGATGTTAGCTAAGTGTGTAATTAAAAATGATACCAAATTC	11311	0	A_55_P2026089	Usp30	NM_001033202	ref|Mus musculus ubiquitin specific peptidase 30 (Usp30), mRNA [NM_001033202]	1.1708	0.172977	1.01897	0.00116047	1.52026	2	0	0	0	0.985036	0.959198	0.831823	1.06972	1.07214	1.37053	0.899918	0.962655	0.792073	1.01848	1.01813	1.02029
862	5145	DATA	12196	75	60	ref|NM_146191|ens|ENSMUST00000145954|ens|ENSMUST00000137181|ens|ENSMUST00000015277	mm|chr7:73404131-73404072	0	NA	6955	ATCTCTGGGCCCAGAGAAAGGGCCTGTGTTTATGACTTGGTAAAATAAACTTGGACACAG	11332	0	A_55_P2501481	Lrrk1	NM_146191	ref|Mus musculus leucine-rich repeat kinase 1 (Lrrk1), mRNA [NM_146191]	1.28977	0.422277	0.938251	0.0264438	1.43902	2	0	0	0	1.01111	0.919131	1.01338	1.13176	0.969289	1.76827	0.972321	0.712185	0.687801	0.968783	0.9233	0.922669
868	5192	DATA	12326	76	26	ref|NM_001289899|ref|NM_013767|ref|NM_001289898|ens|ENSMUST00000120859	mm|chr15:79255414-79255355	0	NA	1350	GTTCTCAACATACCTCAACTTCTGCCGCTCCCTGCGGTTCGATGATAAGCCTGACTACTC	11269	0	A_55_P2122555	Csnk1e	NM_001289899	ref|Mus musculus casein kinase 1, epsilon (Csnk1e), transcript variant 3, mRNA [NM_001289899]	1.0178	0.185066	0.830509	0.0158827	1.74647	2	0	0	0	1.23868	1.27673	0.926145	0.888195	0.935463	1.22975	0.907219	1.2312	0.875092	0.838792	0.812197	0.840539
879	5245	DATA	12463	76	163	ref|NM_011551|ref|NM_001302954|ref|NM_001302955|ref|NM_001044383	mm|chr11:102167616-102167557	0	NA	2949	GGAGTTTGGGGGTGGGAGAGAGTCTTAAAGAGTTTGGTGAGACCTCCACACCTGCAGCCT	11512	0	A_52_P281879	Ubtf	NM_011551	ref|Mus musculus upstream binding transcription factor, RNA polymerase I (Ubtf), transcript variant 1, mRNA [NM_011551]	1.14822	0.0485542	0.989785	0.0975501	2.51839	2	0	0	0	0.423074	1.07123	1.2591	1.12167	1.11873	1.20426	1.01198	0.884506	0.936085	1.09947	0.912744	0.95714
880	5246	DATA	12467	77	3	ens|ENSMUST00000186158|tc|TC1636747|tc|TC1734358	mm|chr18:35737973-35738032	0	NA	418	CTTTACTAATAAATCATCTCTGTTTTAGAGGCTTAACAGAGCTACTTTGTGAGAAGAACC	11519	0	A_55_P2718227	Matr3	ENSMUST00000186158	ens|matrin 3 [Source:MGI Symbol;Acc:MGI:1298379] [ENSMUST00000186158]	1.65149	0.233418	0.970277	0.306431	3.06303	3	0	0	0	1.56741	0.878116	0.827642	1.55501	1.91768	1.48178	0.00027	0.860991	0.00027	0.924535	0.689289	1.29701
882	5251	DATA	12484	77	20	ref|NM_027748|ens|ENSMUST00000129720|ens|ENSMUST00000026888|gb|BC053691	mm|chr2:9837764-9837705	0	NA	3219	GGCTGGCACCTCCATCTGCCTATTACCAGTGACAAGTATTAATAAAGACGCCACACATCT	11551	0	A_55_P2027594	Taf3	NM_027748	ref|Mus musculus TAF3 RNA polymerase II, TATA box binding protein (TBP)-associated factor (Taf3), mRNA [NM_027748]	1.1785	0.200571	0.871941	0.0760393	2.47543	2	0	0	0	1.03768	1.16273	0.888108	1.0394	1.40842	1.0877	1.08721	1.11295	0.559984	0.848239	0.810576	0.957009
883	5253	DATA	12487	77	23	ref|NM_008928|ens|ENSMUST00000130269|ens|ENSMUST00000019076|gb|AK167442	mm|chr11:60766210-60766269	0	NA	2070	AATCTATTTTTGTGAAGAAAGGCCTGCCTCTTCCACCCTTTTCCTGGGCAGGAACCTATT	11557	0	A_55_P2805669	Map2k3	NM_008928	ref|Mus musculus mitogen-activated protein kinase kinase 3 (Map2k3), mRNA [NM_008928]	1.05013	0.0536026	1.15524	0.0499659	2.48454	3	0	0	0	0.799698	0.910168	1.00831	1.07257	1.08886	0.988949	1.02856	0.984988	0.65217	1.10074	1.1661	1.19889
887	5313	DATA	12614	77	150	ref|NM_134077|ens|ENSMUST00000100327|gb|BC069928|gb|BC029079	mm|chr14:105516263-105516204	0	NA	3276	CAAACCAATAGCTAACATGTCAGCTGTGGACACTGAAGAAGCTGAACCTGATGAAGAGGA	11794	0	A_66_P134430	Rbm26	NM_134077	ref|Mus musculus RNA binding motif protein 26 (Rbm26), mRNA [NM_134077]	1.07133	0.0270479	0.936737	0.0668756	3.23172	2	0	0	0	1.28015	0.957283	0.86776	1.04408	1.09817	1.07175	0.911159	0.932124	1.02731	0.948897	0.864616	0.996698
897	5390	DATA	12817	79	25	ref|NM_001081214|ens|ENSMUST00000153111|ens|ENSMUST00000146882|ref|XM_011247240	mm|chr19:46147083-46147142	0	NA	4927	TTCGATTCACTTGACTTTGATACATTGTTGAAACAGGCCCAGAAGAACCTCAGGAGGTAA	11864	0	A_51_P143103	Pprc1	NM_001081214	ref|Mus musculus peroxisome proliferative activated receptor, gamma, coactivator-related 1 (Pprc1), mRNA [NM_001081214]	1.1762	0.0448755	1.00513	0.0679958	3.63692	3	0	0	0	1.091	1.00143	0.747125	1.18465	1.21624	1.1277	1.02564	0.9706	0.620226	0.955311	0.97748	1.08259
916	5496	DATA	13056	80	100	ref|NM_001007571|ens|ENSMUST00000019506|gb|AK167785|gb|AK146163	mm|chr8:86770305-86770246	0	NA	489	GCTGGTGTGATGATAAATGTGGCTCTGTTGTCTCTCCAGCCATTCAGTGGGCATAATCTC	12000	0	A_51_P391668	D8Ertd738e	NM_001007571	ref|Mus musculus DNA segment, Chr 8, ERATO Doi 738, expressed (D8Ertd738e), mRNA [NM_001007571]	1.14639	0.100487	0.971643	0.0183801	2.96285	2	0	0	0	0.946789	0.92417	1.03526	1.05028	1.13815	1.25074	0.953595	1.03046	0.75563	0.958999	0.992727	0.963203
921	5531	DATA	13169	81	49	ref|NM_023343|ens|ENSMUST00000187678|ens|ENSMUST00000185886|ens|ENSMUST00000187105	mm|chr1:93272963-93272904	0	NA	1047	GCTTGCGACGGGCTTTTCAAGGTCTTTACCCCAGAAGAAGCTGTGAACTTCATCTTGTCC	12197	0	A_66_P127901	Ilkap	NM_023343	ref|Mus musculus integrin-linked kinase-associated serine/threonine phosphatase 2C (Ilkap), mRNA [NM_023343]	1.16818	0.181099	0.898785	0.0101902	2.57246	2	0	0	0	1.13224	1.03188	0.918777	1.13086	1.00865	1.36503	0.889916	0.972772	0.853515	0.897196	0.889483	0.909677
940	5659	DATA	13498	83	50	ref|NM_153057|ens|ENSMUST00000033121|gb|AK082495|gb|AK142338	mm|chr7:53339511-53339570	0	NA	4187	ATCTGTCCCTCCCAGAAGGGTCTGTCAACAGCTGGATGAATAAAGTCAGCCACTCGTTTG	12491	0	A_51_P105520	Nomo1	NM_153057	ref|Mus musculus nodal modulator 1 (Nomo1), mRNA [NM_153057]	1.13314	0.159316	0.94068	0.0688931	1.92056	2	0	0	0	1.00279	1.04066	0.923416	1.07023	1.01489	1.31431	0.953159	0.925491	0.933013	0.985323	0.97538	0.861336
958	5799	DATA	13816	85	40	ref|NM_011212|ens|ENSMUST00000073961|ref|XM_006507458|ref|XM_006507460	mm|chr7:142873325-142874928	0	NA	2302	TGTGAAGAGCTTAAGACTTCAGAGACCACACATGGTGCAGACCCTGGAGCAATATGAATT	12769	0	A_51_P181772	Ptpre	NM_011212	ref|Mus musculus protein tyrosine phosphatase, receptor type, E (Ptpre), mRNA [NM_011212]	1.12565	0.199197	0.878911	0.0429288	2.09731	2	0	0	0	1.05705	1.09527	0.80914	1.09159	1.33968	0.945681	1.05594	1.00118	0.967733	0.882464	0.834316	0.919953
984	5963	DATA	14201	87	97	ref|NM_016927|ens|ENSMUST00000014647|gb|AF182033|tc|TC1586251	mm|chr18:34602230-34602289	0	NA	2247	AAGCACACATGGTGAACTGTCAGGGAACACAAGCACTTTATGGCGTCAACTTTCAAGGAA	13171	0	A_51_P228892	Pkd2l2	NM_016927	ref|Mus musculus polycystic kidney disease 2-like 2 (Pkd2l2), transcript variant 1, mRNA [NM_016927]	1.34178	0.111156	1.11801	0.148082	2.0933	3	0	0	0	0.881205	0.940592	0.912234	1.2346	1.45653	1.33422	0.667543	0.8623	0.356754	1.19279	1.21379	0.947447
989	5997	DATA	14289	88	21	ref|NM_139143|ens|ENSMUST00000070726|gb|AK028976|gb|BC054780	mm|chr18:24738620-24738561	0	NA	3643	TAGGCTTCCAAGTGGCAAGTATTAAAACTTTAGCCCATGAGAGGATGTTAAGACCTGTTC	13038	0	A_51_P259214	Slc39a6	NM_139143	ref|Mus musculus solute carrier family 39 (metal ion transporter), member 6 (Slc39a6), mRNA [NM_139143]	1.19483	0.20605	0.817316	0.0377952	3.12127	2	0	0	0	1.04049	0.996649	0.999328	0.975216	1.38391	1.22535	0.966935	0.959628	1.00055	0.774814	0.829981	0.847152
994	6026	DATA	14368	88	100	ref|NM_028446|ens|ENSMUST00000085086|ens|ENSMUST00000021605|ref|XM_006515383	mm|chr12:103150960-103150901	0	NA	421	ACTGGCCAGATTTCGAACTTCACGAAGGATATGCTGTTGGAGGGCACGGAGGATGTGCCA	13178	0	A_55_P2020926	Trip11	NM_028446	ref|Mus musculus thyroid hormone receptor interactor 11 (Trip11), mRNA [NM_028446]	1.2804	0.103181	0.990606	0.10752	3.36828	3	0	0	0	0.956173	1.04964	1.00751	1.16725	1.30467	1.36929	0.850595	0.800204	0.522857	0.963012	1.10923	0.899572
1014	6128	DATA	14599	90	3	ref|NM_144835|gb|BC019693|gb|AK032134|tc|TC1582130	mm|chr13:12531103-12531160	0	NA	6718	ATCCTCTCCTGCCTTTTGTACAGAGTTGCTAAGGAGTAAACCGGATGGTATTTTTATAAA	13300	0	A_66_P108019	Heatr1	NM_144835	ref|Mus musculus HEAT repeat containing 1 (Heatr1), mRNA [NM_144835]	1.22357	0.241681	0.975167	0.0235774	1.77179	2	0	0	0	0.87587	0.938807	0.952086	1.12912	1.04337	1.49821	1.06825	0.919279	0.64951	0.948404	0.992872	0.984224
1017	6148	DATA	14646	90	50	ref|NM_173396|ref|NM_001291124|ens|ENSMUST00000081335|ref|XM_006499352	mm|chr2:156681159-156681218	0	NA	2752	GTCTCTGCTTAGGTTGCCTGTAAGATAAATGTGGAGAAGCACGGTTGTCCCATTGAACAA	13388	0	A_51_P456657	Tgif2	NM_173396	ref|Mus musculus TGFB-induced factor homeobox 2 (Tgif2), transcript variant 1, mRNA [NM_173396]	1.3506	0.337485	0.837095	0.158229	2.38616	2	0	0	0	0.866677	1.1831	1.06056	1.2967	1.0433	1.71178	1.03282	0.969035	0.324741	0.790615	0.707311	1.01336
1025	6198	DATA	14764	91	4	ref|NM_010178|ref|NM_001284196|ens|ENSMUST00000030438|ens|ENSMUST00000102544	mm|chr4:135423060-135423119	0	NA	666	ACCCAGTACAGTTCTGCTTACTACACTTCAAGAAAGATCTGAAAGCGGAAAAAAGAACCA	13601	0	A_52_P250968	Srsf10	NM_010178	ref|Mus musculus serine/arginine-rich splicing factor 10 (Srsf10), transcript variant 1, mRNA [NM_010178]	1.20781	0.149428	0.983768	0.0680928	2.36316	2	0	0	0	0.896181	1.01001	0.767466	1.34327	1.23265	1.04752	0.956416	0.788784	1.00639	1.03234	1.01303	0.905935
1044	6306	DATA	15025	92	101	ref|NM_025486|ens|ENSMUST00000126705|ens|ENSMUST00000153146|ens|ENSMUST00000015000	mm|chr8:107852879-107852938	0	NA	696	GAGCAGTGAGGGCCTAGTTTAAGGGCCAAAGCAGCCTGGATTATAGGATCACTAAATAAA	13772	0	A_51_P213153	Tmem208	NM_025486	ref|Mus musculus transmembrane protein 208 (Tmem208), mRNA [NM_025486]	1.25641	0.226971	1.03027	0.0358817	1.70454	2	0	0	0	0.897874	0.907503	1.02024	1.06256	1.20058	1.50609	0.958053	0.882027	0.474273	1.04832	1.05354	0.988945
1055	6352	DATA	15132	93	44	ref|NM_027469|ref|XM_006531348|ref|XM_006531350|ref|XM_011248499	mm|chr8:108240340-108240281	0	NA	1708	CTTCAGGCTGAGTTGTGGTCTCACAGGATGAGAAAACCCAACAGGAACTAGCTTGGTTGA	13969	0	A_51_P111488	Gfod2	NM_027469	ref|Mus musculus glucose-fructose oxidoreductase domain containing 2 (Gfod2), mRNA [NM_027469]	1.29987	0.185841	0.879299	0.202929	2.64731	3	0	0	0	1.58626	0.961649	0.671711	1.15493	1.2353	1.50938	0.766479	1.01183	0.464564	0.648232	0.961129	1.02854
1058	6375	DATA	15188	93	100	ref|NM_173416|ens|ENSMUST00000053034|gb|AK040407|tc|TC1592372	mm|chr12:4859638-4859697	0	NA	2854	GTATTTAAAAAGCTATTAGGAGGAATAGCTGAAGAGAGCAATGGTGCTATATTCATATGC	14068	0	A_55_P2014540	BC068281	NM_173416	ref|Mus musculus cDNA sequence BC068281 (BC068281), transcript variant 2, mRNA [NM_173416]	1.3607	0.0616453	1.04133	0.0532503	6.79071	3	0	0	0	1.15427	1.05953	0.653289	1.42937	1.34261	1.31013	0.436783	0.70133	0.788686	1.00024	1.02227	1.10149
1091	6589	DATA	15680	96	100	ens|ENSMUST00000118772|ens|ENSMUST00000130005|ens|ENSMUST00000080097|ens|ENSMUST00000080223	mm|chr11:6459247-6459188	0	NA	259	AGGATCAATGTGTGAATTGAGCACATCAAACACTCAAAGAGCAGGGACAGCTTCCTGAAG	14366	0	A_55_P2130576	ENSMUST00000118772	ENSMUST00000118772	ens|predicted gene 11975 [Source:MGI Symbol;Acc:MGI:3650057] [ENSMUST00000118772]	1.161	0.148569	0.956624	0.0485149	2.26497	2	0	0	0	1.27261	1.29257	0.527831	0.990488	1.22992	1.26259	1.06751	1.03858	0.44802	0.979336	0.989617	0.900919
1111	6651	DATA	15840	97	96	ref|NM_178598|ens|ENSMUST00000111228|ens|ENSMUST00000111230|gb|AK171088	mm|chr1:174436738-174436797	0	NA	613	TTGCAAGAGGGCAAGAACGTGATTGGGTTGCAGATGGGCACCAACCGTGGAGCATCTCAG	14647	0	A_55_P2141884	Tagln2	NM_178598	ref|Mus musculus transgelin 2 (Tagln2), mRNA [NM_178598]	1.14446	0.152169	0.903058	0.0434333	2.64228	2	0	0	0	1.20017	0.919836	0.967694	1.00672	1.11886	1.30781	0.976678	1.10662	0.686431	0.855871	0.911937	0.941365
1117	6686	DATA	15927	98	19	ref|NM_016905|ens|ENSMUST00000021114|gb|AK088151|gb|AB027012	mm|chr11:115870183-115870124	0	NA	1081	CTTTGGTGGCTGCACCGTCACATTGCTGGAGGCCTCTGTTGCCCCTCTTGTCATAGATCA	14511	0	A_51_P243304	Galk1	NM_016905	ref|Mus musculus galactokinase 1 (Galk1), mRNA [NM_016905]	1.09134	0.0524883	0.964907	0.0641954	2.64089	3	0	0	0	0.910441	1.04052	1.18419	1.03116	1.11518	1.12768	1.03478	1.01104	0.650293	1.03108	0.960742	0.902896
1118	6692	DATA	15938	98	30	ref|NM_009891|ens|ENSMUST00000070125|gb|D12491|gb|D12492	mm|chr14:33271815-33267898	0	NA	374	TTCTAGCTGTGAGGAGGTGCTGGACTTACCTAAGTTGCCAGTGCCCCCACTGCAGCAAAC	14532	0	A_55_P2744606	Chat	NM_009891	ref|Mus musculus choline acetyltransferase (Chat), mRNA [NM_009891]	1.53661	0.361586	0.835293	0.171376	3.03573	2	0	0	0	0.914188	1.30014	0.968879	1.4631	1.92931	1.21743	1.15785	0.542688	0.000534	0.638597	0.914854	0.952427
1144	6843	DATA	16307	100	71	ref|NM_024257|ens|ENSMUST00000037820|gb|BC003491|gb|AK013245	mm|chr4:62160215-62160156	0	NA	955	GTCTGGTGAGGGAAGTAGCTGGGACCAAATAAACACTGGAGGCAGGGAGTCCCTTCTCTC	14902	0	A_51_P465582	Hdhd3	NM_024257	ref|Mus musculus haloacid dehalogenase-like hydrolase domain containing 3 (Hdhd3), mRNA [NM_024257]	1.27044	0.202456	0.921057	0.0432158	2.92319	2	0	0	0	1.04436	0.706186	1.14903	1.16608	1.14145	1.50378	1.3437	0.742135	0.440099	0.895165	0.970947	0.89706
1148	6861	DATA	16353	100	117	ref|NM_011103|ens|ENSMUST00000130736|ens|ENSMUST00000112208|ens|ENSMUST00000022521	mm|chr14:31414970-31414383	0	NA	1558	GCCGCTTCGAACTCTACCGGGCTACGTTTTATGCAGCTGAGATCATCTGCGGACTGCAGT	14988	0	A_52_P197498	Prkcd	NM_011103	ref|Mus musculus protein kinase C, delta (Prkcd), mRNA [NM_011103]	1.49121	0.277656	0.750236	0.0846836	4.42122	2	0	0	0	1.2262	1.08682	0.931683	1.17778	1.70637	1.58948	0.616538	0.732855	0.681572	0.84688	0.714806	0.689021
1161	6963	DATA	16585	102	21	gb|AK050517|tc|TC1599421|riken|C820007C08	mm|chr9:72568535-72568594	0	NA	3266	CTGCCTTGGGTTTCTATCTCAGGCTGACATGGTACAAGAATAATAAACAAATTTCATGTC	15109	0	A_55_P2731811	Nedd4	AK050517	gb|Mus musculus adult pancreas islet cells cDNA, RIKEN full-length enriched library, clone:C820007C08 product:neural precursor cell expressed, developmentally down-regulted gene 4, full insert sequence. [AK050517]	1.24668	0.167267	0.931616	0.141684	2.48947	3	0	0	0	1.03433	0.960069	0.718532	1.07139	1.2641	1.40456	0.937606	1.17399	0.640574	0.768213	1.00631	1.02032
1164	6971	DATA	16606	102	42	ref|NM_010414|ens|ENSMUST00000080036|ref|XM_006503744|gb|U24233	mm|chr5:35251949-35252008	0	NA	9984	ACTGGGGCTGCCAGGTGTCCAGCACCATTTTCCTTTCTGTGTTTTCTTCTCAGGAGTTAA	15148	0	A_55_P2088530	Htt	NM_010414	ref|Mus musculus huntingtin (Htt), mRNA [NM_010414]	1.32066	0.197752	0.963911	0.0326558	3.08294	2	0	0	0	0.917493	0.829812	0.899176	1.20306	1.20996	1.54897	0.921096	0.813597	0.765103	0.962084	0.997441	0.932206
1177	7035	DATA	16747	103	19	ref|NM_080708|ens|ENSMUST00000035635|gb|AK164796|gb|AK169520	mm|chr5:97519810-97519869	0	NA	6310	AGGTGCACGTGTATTAATATCACTACTTACGGGAAGTTTGGGTATATTTGCTTAATACCT	15401	0	A_51_P337944	Bmp2k	NM_080708	ref|Mus musculus BMP2 inducible kinase (Bmp2k), mRNA [NM_080708]	1.11492	0.0326167	0.997575	0.0560777	3.133	3	0	0	0	0.985701	1.04658	0.881345	1.09039	1.10243	1.15194	0.902751	1.03872	0.807425	1.02818	0.932854	1.03169
1180	7042	DATA	16770	103	42	ref|NM_024499|ens|ENSMUST00000005067|ref|XM_006513877|ref|XM_006513876	mm|chr10:80507079-80507020	0	NA	1685	GAAGCAGCCACCAGAACCATCTTTGTTGGGGTCAGTCTGAGTGAGGGTGTGGATGTTCCC	15443	0	A_51_P346104	Sgta	NM_024499	ref|Mus musculus small glutamine-rich tetratricopeptide repeat (TPR)-containing, alpha (Sgta), mRNA [NM_024499]	1.0891	0.125412	0.95878	0.0276929	1.75747	2	0	0	0	1.07009	1.045	1.00939	0.977291	1.0653	1.2247	0.912163	1.01382	0.805892	0.926923	0.97231	0.977107
1186	7069	DATA	16836	103	108	ref|NM_018827|ens|ENSMUST00000008032|ref|XM_006509540|ref|XM_006509541	mm|chr8:73027912-73027971	0	NA	1577	GGTTGGGGTATTGCAGGGCCTCCCAAGAGTCTCTTTAAATAAATAAAGGAGTTGTTCAGG	15566	0	A_55_P2052240	Crlf1	NM_018827	ref|Mus musculus cytokine receptor-like factor 1 (Crlf1), mRNA [NM_018827]	1.67521	0.644025	0.455314	0.0578736	3.26763	2	0	0	0	0.869984	1.00182	1.44772	1.5134	1.12752	2.38471	0.98033	0.47933	0.829252	0.427186	0.416881	0.521876
1192	7089	DATA	16886	103	158	ref|NM_018808|ref|NM_001308227|ens|ENSMUST00000005620|ref|XM_006531518	mm|chr8:86135660-86135719	0	NA	2121	GGCGTGAAAGTATCTGTTCTTTGGAGCTAGCCTGGTGTTCTGACCATTCAACTCATTGTA	15653	0	A_51_P153486	Dnajb1	NM_018808	ref|Mus musculus DnaJ (Hsp40) homolog, subfamily B, member 1 (Dnajb1), transcript variant 1, mRNA [NM_018808]	1.18048	0.171301	0.901389	0.0362361	2.76083	2	0	0	0	1.17746	0.795407	0.957078	1.09806	1.06597	1.37741	0.950857	0.971804	0.901791	0.938987	0.866689	0.89849
1193	7090	DATA	16888	103	160	ref|NM_001085500|ens|ENSMUST00000107583|ref|XM_006533028|ref|XM_006533029	mm|chr11:97549772-97549831	0	NA	574	TGACTCCAGGCAGTAATGCTGAGCCACACATGGAAGGGAACCTCCAAGGACCCCATCTTG	15657	0	A_55_P2744369	Cisd3	NM_001085500	ref|Mus musculus CDGSH iron sulfur domain 3 (Cisd3), mRNA [NM_001085500]	1.09628	0.0381237	0.927001	0.0214676	6.70145	3	0	0	0	1.1834	0.935752	0.99649	1.13599	1.05997	1.09289	1.10092	0.876974	0.836612	0.90793	0.922821	0.950251
1203	7141	DATA	16995	104	103	ref|NM_181072|ens|ENSMUST00000034745|ref|XM_006544467|ref|XM_011242814	mm|chr9:70190908-70194524	0	NA	1938	CTGATTGAACTCATGCAGAGCAGTGAGCTGCCTTTTATAAAGTCTTTATTTCCTGAAAAC	15557	0	A_51_P185141	Myo1e	NM_181072	ref|Mus musculus myosin IE (Myo1e), mRNA [NM_181072]	1.90056	0.0452586	1.01522	0.250773	6.01768	2	0	0	0	0.716351	1.17449	0.419158	1.85495	1.90126	1.94546	0.451579	0.490639	0.000463	0.880386	1.30456	0.860702
1210	7167	DATA	17065	105	9	ref|NM_001042760|ref|NM_008767|ens|ENSMUST00000105917|ens|ENSMUST00000052348	mm|chr7:150685129-150685188	0	NA	1435	GGTCCTTTGGAAGAAGCCATTGTCCCAGAAGGGAGAAAAAGCCCGGTGACCACAAAGCCC	15683	0	A_51_P165882	Slc22a18	NM_001042760	ref|Mus musculus solute carrier family 22 (organic cation transporter), member 18 (Slc22a18), transcript variant 2, mRNA [NM_001042760]	1.18993	0.133201	0.839315	0.166213	2.85111	3	0	0	0	0.579119	1.37657	0.819266	1.28722	1.03812	1.24446	0.739652	1.55492	0.842734	0.668555	0.848818	1.00057
1213	7190	DATA	17130	105	74	ref|NM_026640|ens|ENSMUST00000151307|ens|ENSMUST00000025595|ens|ENSMUST00000144662	mm|chr19:12663882-12663941	0	NA	2894	ATACAGAAGACATGAGGTCTTAGATTATTGGAGGGAAAGTGGAACGAGTAGTTGAGATGC	15797	0	A_51_P394802	Fam111a	NM_026640	ref|Mus musculus family with sequence similarity 111, member A (Fam111a), mRNA [NM_026640]	1.48206	0.43899	0.934991	0.0413	2.149	2	0	0	0	1.04891	0.552317	1.10625	1.19065	1.26858	1.98696	0.940563	0.924952	0.175853	0.968341	0.888794	0.947837
1249	7383	DATA	17596	108	48	ref|NM_008825|tc|TC1633762	mm|chr1:132589006-132588947	0	NA	7133	CTCTGCTGAAAGTGAAGATGTTAATCCTTAGTAGCATTCTGATTTATTCCTGTGATATTG	16049	0	A_55_P2499728	Pfkfb2	NM_008825	ref|Mus musculus 6-phosphofructo-2-kinase/fructose-2,6-biphosphatase 2 (Pfkfb2), transcript variant 1, mRNA [NM_008825]	1.27509	0.0492208	1.0664	0.0255488	6.5177	3	0	0	0	0.933588	0.739542	0.811651	1.27211	1.32573	1.22742	0.944859	1.03364	0.512248	1.09452	1.0446	1.06009
1273	7491	DATA	17900	110	24	ref|NM_030717|ens|ENSMUST00000034929|ref|XM_006511561|gb|AK213700	mm|chr9:66818513-66818454	0	NA	932	CAGCGCGAAGCCAGGCAAGAAAAAGAATGACTTCGAACAAGGCGAATTGTATTTGAAAGA	16302	0	A_66_P100148	Lactb	NM_030717	ref|Mus musculus lactamase, beta (Lactb), mRNA [NM_030717]	1.37605	0.073183	0.989583	0.135876	4.33727	3	0	0	0	0.702943	1.06002	0.842297	1.459	1.3206	1.34855	1.07761	0.772245	0.447993	1.12138	0.849967	0.997401
1295	7631	DATA	18246	112	42	ref|NM_172438|ens|ENSMUST00000038237|ens|ENSMUST00000101615|ref|XM_006514448	mm|chr11:4828807-4828866	0	NA	2173	CCACATGTGGTTCTTGATATTTTCCAAAGACACCAGCTAATTAAAATGTCATCTGACAAA	16623	0	A_55_P2013078	Thoc5	NM_172438	ref|Mus musculus THO complex 5 (Thoc5), mRNA [NM_172438]	1.19915	0.0758212	1.02156	0.0652652	3.07482	3	0	0	0	1.17557	1.01268	0.685207	1.27287	1.12139	1.20321	1.06424	1.04429	0.355875	1.04734	0.947337	1.06999
1320	7807	DATA	18661	114	129	ref|NM_021273|ens|ENSMUST00000117367|ens|ENSMUST00000001304|gb|BC106109	mm|chr12:112907846-112907787	0	NA	1197	ACTACTCATTGAGATGGAGCAACGGCTCGAGCAGGGTCAGGCAATCGATGACCTCATGCC	17083	0	A_55_P1976224	Ckb	NM_021273	ref|Mus musculus creatine kinase, brain (Ckb), mRNA [NM_021273]	1.31617	0.0871899	1.07746	0.0738548	3.6184	3	0	0	0	0.692449	0.715759	1.00886	1.36558	1.2155	1.36744	0.94088	0.745293	0.715852	1.09681	0.99586	1.13972
1332	7870	DATA	18800	115	104	ref|NM_026481|ens|ENSMUST00000014990|ref|XM_006531324|gb|BC010788	mm|chr8:107991451-107991392	0	NA	964	GCTCTGGCCAAGTGCCTAATTCTTACCCAGACCTCAATAAAGATACCTTTTGTACCAGGA	17329	0	A_66_P126913	Tppp3	NM_026481	ref|Mus musculus tubulin polymerization-promoting protein family member 3 (Tppp3), mRNA [NM_026481]	1.17546	0.102755	0.855442	0.0342147	5.11796	2	0	0	0	1.1207	0.894634	1.07457	1.09206	1.14407	1.29025	0.994072	1.08328	0.740055	0.859808	0.819254	0.887264
1334	7882	DATA	18842	115	146	ref|NM_001172146|ref|NM_146165|ens|ENSMUST00000031613|ens|ENSMUST00000100483	mm|chr5:144663633-144663574	0	NA	1124	TGGTACGGCTTCCAGTCTGTTGTCAGAAAGGGACTTGTCCAATAAAGTACCATATCATCT	17402	0	A_55_P1993976	Aimp2	NM_001172146	ref|Mus musculus aminoacyl tRNA synthetase complex-interacting multifunctional protein 2 (Aimp2), transcript variant 1, mRNA [NM_001172146]	1.0961	0.0677594	1.02336	0.0153764	1.81321	2	0	0	0	0.966489	0.863592	0.931599	1.17228	1.04258	1.07343	0.98561	0.899468	0.994875	1.0345	1.00582	1.02977
1335	7884	DATA	18848	115	152	ref|NM_172682|ens|ENSMUST00000118408|ens|ENSMUST00000119077|ens|ENSMUST00000126445	mm|chr3:85464045-85463986	0	NA	4327	GGGGTTGAGGGTGTGCAGAGCTTGGAATGGGTGCAAAAGATAAAAATTCTGCTAACTGTA	17413	0	A_55_P2159480	Fam160a1	NM_172682	ref|Mus musculus family with sequence similarity 160, member A1 (Fam160a1), mRNA [NM_172682]	1.17106	0.0554076	0.867834	0.0900603	4.96689	3	0	0	0	1.11082	0.998189	0.955468	1.11879	1.22915	1.16522	0.928247	0.819713	1.0709	0.947071	0.886541	0.769889
1336	7885	DATA	18849	115	153	ref|NM_053179|ens|ENSMUST00000030018|gb|AB041263|gb|AK156254	mm|chr4:46515457-46515516	0	NA	1050	GAAGATGACACGGTCATGGAAGAATCCGTGGAAAGTCACAGCAAGAAAATCAAGGCTTAA	17415	0	A_55_P2109752	Nans	NM_053179	ref|Mus musculus N-acetylneuraminic acid synthase (sialic acid synthase) (Nans), mRNA [NM_053179]	1.12798	0.0240664	0.962683	0.0618606	4.31314	2	0	0	0	1.01932	0.938505	0.998526	1.11114	1.15554	1.11725	1.07078	0.853931	0.846969	1.02501	0.901298	0.961742
1360	8042	DATA	19219	118	31	ref|NM_134024|ens|ENSMUST00000043680|gb|AK160125|gb|AK154019	mm|chr11:100987464-100987523	0	NA	1339	AGATTGTGCAGCAGCTGATTGACGAGTACCACGCGGCCACACGGCCAGACTATATCTCCT	17490	0	A_51_P499864	Tubg1	NM_134024	ref|Mus musculus tubulin, gamma 1 (Tubg1), mRNA [NM_134024]	1.14386	0.0413134	1.03565	0.0617181	2.52343	3	0	0	0	0.991001	0.93648	1.06311	1.14807	1.1006	1.1829	0.989674	0.940599	0.540597	1.06269	0.965032	1.07924
1362	8048	DATA	19234	118	46	ref|NM_026110|ens|ENSMUST00000150397|ens|ENSMUST00000023698|ref|XR_384945	mm|chr16:91017176-91017117	0	NA	2581	AATTTTTGCCGATATCTTGTACATTTAGCAGATACAATTTACAGGAACAGTATTGGGTGC	17518	0	A_66_P100232	Paxbp1	NM_026110	ref|Mus musculus PAX3 and PAX7 binding protein 1 (Paxbp1), mRNA [NM_026110]	1.34637	0.0481374	1.02152	0.0696028	6.64876	3	0	0	0	0.982863	1.16655	0.721422	1.373	1.37531	1.2908	0.591532	0.955851	0.478118	1.01258	0.956816	1.09516
1366	8083	DATA	19300	118	112	ens|ENSMUST00000171003|nap|NAP029999-1|nap|NAP000369-004|nap|NAP092230-001	mm|chr10:72664594-72664653	0	NA	151	TAGTTACGCGCGATCCTGCAAGCAAAAGATCAAGACGATTTGGCTTTGTAACTTTCTCAT	17635	0	A_52_P272534	ENSMUST00000171003	ENSMUST00000171003	ens|predicted gene 5778 [Source:MGI Symbol;Acc:MGI:3646275] [ENSMUST00000171003]	1.15224	0.0924997	1.01148	0.0770616	2.02506	3	0	0	0	0.912565	0.96554	1.15273	1.08562	1.11324	1.25785	1.01727	0.717919	0.742833	1.07553	1.03295	0.925957
1370	8108	DATA	19354	119	2	ref|NM_008723|ref|NR_002702|ens|ENSMUST00000119728|ens|ENSMUST00000070215	mm|chr19:45822756-45822697	0	NA	439	GACCTTTCTGAAGAAGAAAGTGATGATGAGAGCGAAGAAGATGAAATTAAGCTGTGTGGC	17733	0	A_66_P127241	Npm3	NM_008723	ref|Mus musculus nucleoplasmin 3 (Npm3), mRNA [NM_008723]	1.42477	0.278302	0.950115	0.28199	2.07507	3	0	0	0	0.672857	1.53057	0.17643	1.74481	1.28994	1.23957	0.819182	0.78515	0.891146	1.1772	0.634476	1.03867
1392	8222	DATA	19615	120	99	ref|NM_013805|ens|ENSMUST00000043577|gb|AK077282|gb|BC002016	mm|chr16:18778046-18778105	0	NA	1106	TCCTACTGAGATCCTGGGGGCACTAGATGCTGCCTTAATGTCCAGTGGCACCTGCTAACC	17909	0	A_51_P189814	Cldn5	NM_013805	ref|Mus musculus claudin 5 (Cldn5), mRNA [NM_013805]	1.59235	0.397081	0.588562	0.0561153	4.3354	2	0	0	0	0.982922	1.17626	1.13709	1.24316	2.02428	1.5096	0.789855	0.778927	0.592205	0.523776	0.619977	0.621935
1396	8284	DATA	19782	121	102	ref|NM_011806|ref|NM_001110327|ens|ENSMUST00000183347|ens|ENSMUST00000183448	mm|chr5:9119999-9119940	0	NA	2607	ACATTGTGACTACATTGTCTCCAAAGAAAGGAGCCATCCCAGGAGTTGTGGTTTGCCATT	18209	0	A_55_P2790334	Dmtf1	NM_011806	ref|Mus musculus cyclin D binding myb-like transcription factor 1 (Dmtf1), transcript variant 1, mRNA [NM_011806]	1.28363	0.137856	1.02371	0.0285814	3.19769	2	0	0	0	1.27509	1.12174	0.628102	1.15848	1.26101	1.4314	0.663315	0.984655	0.405086	0.996884	1.05377	1.02047
1415	8434	DATA	20112	123	104	ref|NM_009450|ens|ENSMUST00000056427|gb|M28739|gb|AK134545	mm|chr13:34166145-34166116	0	NA	1442	CTTAGTGAACTTCTGTTGTCCTCCAGCATTGGTCTTTCTATTTGTAAATTATGGTGCTCA	18507	0	A_51_P490023	Tubb2a	NM_009450	ref|Mus musculus tubulin, beta 2A class IIA (Tubb2a), mRNA [NM_009450]	1.38014	0.22659	0.842156	0.0446385	4.03478	2	0	0	0	0.966445	0.870575	1.07484	1.19872	1.30757	1.63412	0.97601	0.756214	0.689036	0.828675	0.891981	0.805811
1425	8485	DATA	20213	124	41	ref|NM_011390|ens|ENSMUST00000017900|ref|XM_006517171|ref|XM_006517172	mm|chr13:73946469-73946528	0	NA	2845	ACGCTAATGATGGAGCAGAGGTCACAGATGCTGAAACAGATGCAGTTGTCAAAGAATGAG	18395	0	A_55_P2738442	Slc12a7	NM_011390	ref|Mus musculus solute carrier family 12, member 7 (Slc12a7), mRNA [NM_011390]	1.26644	0.0943578	1.0296	0.107061	2.8745	3	0	0	0	0.964229	0.996812	0.883509	1.35543	1.27639	1.1675	0.959815	0.713555	0.593946	0.980836	1.15237	0.955611
1426	8488	DATA	20219	124	47	ref|NM_011130|ens|ENSMUST00000033938|ref|XM_006509029|ref|XM_011242125	mm|chr8:23738719-23738660	0	NA	1098	CTAGGAGTCCTAATTTATTTCTTAACCTTTGCTATGTAAGGGTTTTTGGTGTTCTTAAGC	18405	0	A_55_P2501472	Polb	NM_011130	ref|Mus musculus polymerase (DNA directed), beta (Polb), mRNA [NM_011130]	1.17167	0.123947	1.06152	0.0196411	1.52016	2	0	0	0	1.02421	0.864548	0.985221	1.11379	1.08724	1.31396	0.958666	0.98623	0.481552	1.05749	1.04421	1.08287
1431	8540	DATA	20344	125	8	ref|NM_001163672|ref|NM_016961|ref|NM_001163671|ref|NM_207692	mm|chr11:49699496-49699555	0	NA	4254	CAGATCGCGTATCTCAAAAGTGGCTTTGCCTAATGTTTTATAATAAAATATGTCATGTGC	18634	0	A_55_P1973289	Mapk9	NM_001163672	ref|Mus musculus mitogen-activated protein kinase 9 (Mapk9), transcript variant alpha1, mRNA [NM_001163672]	1.02109	0.0486688	1.11417	0.0592102	2.1034	3	0	0	0	1.0355	1.11836	0.616031	1.065	1.02952	0.96876	1.06304	1.18895	0.572325	1.07335	1.08709	1.18208
1436	8577	DATA	20430	125	94	ref|NM_009775|ens|ENSMUST00000047419|gb|L17306|gb|AK151569	mm|chr15:83402651-83402710	0	NA	304	GAAAGAGCTGGGAGGTTTCACAGAGGACGCTATGGTTCCCTTGGGTCTCTACACTGGTCA	18790	0	A_51_P222657	Tspo	NM_009775	ref|Mus musculus translocator protein (Tspo), mRNA [NM_009775]	1.06629	0.163873	0.834616	0.0611701	2.29409	2	0	0	0	1.15259	1.10353	1.03533	0.950484	0.994599	1.25379	1.10679	1.09556	0.803476	0.765457	0.856764	0.881627
1440	8608	DATA	20500	125	164	ref|NM_029466|ens|ENSMUST00000128682|ens|ENSMUST00000129509|ens|ENSMUST00000017562	mm|chr2:14991574-14994789	0	NA	401	ACCTATTACTCAAACACAGAGTTCATCATTCTTGTTGTGGATAGCATTGACAGGGAACGC	18923	0	A_52_P104885	Arl5b	NM_029466	ref|Mus musculus ADP-ribosylation factor-like 5B (Arl5b), mRNA [NM_029466]	1.34603	0.1672	0.936974	0.114007	3.50106	3	0	0	0	0.929104	0.862551	1.2115	1.33535	1.18443	1.51832	0.669708	0.815739	0.662381	1.06608	0.850136	0.894708
1442	8614	DATA	20514	126	14	ref|NM_001025250|ref|NM_001287056|ref|NM_001287057|ref|NM_009505	mm|chr17:46154446-46154387	0	NA	3026	CAGATCGGTGACAGTCACTAGCTTGTCCTGAGAAGATATTTAATTTTGCTAACACTCAGC	18644	0	A_52_P638895	Vegfa	NM_001025250	ref|Mus musculus vascular endothelial growth factor A (Vegfa), transcript variant 1, mRNA [NM_001025250]	1.31046	0.165096	1.01344	0.145304	2.33917	3	0	0	0	1.23267	1.1535	0.711039	1.5011	1.21576	1.21453	0.540113	0.86985	0.521111	0.860934	1.02912	1.15027
1456	8700	DATA	20715	127	51	ref|NM_001198573|ref|NM_001033291|ens|ENSMUST00000186670|ens|ENSMUST00000188332	mm|chr1:89846834-89846775	0	NA	3437	TGAGGCAGAGAGTAGCTGACTTCTATTCTCTTCCTGTGGAGAAAATTGAAATTGCCAAAT	19014	0	A_55_P2566288	Usp40	NM_001198573	ref|Mus musculus ubiquitin specific peptidase 40 (Usp40), transcript variant 1, mRNA [NM_001198573]	1.26245	0.0414451	0.994794	0.00870809	10.9468	2	0	0	0	1.14258	0.98714	1.07158	1.21751	1.27067	1.29917	0.843901	0.806114	0.376942	0.984834	1.00097	0.998572
1492	8879	DATA	21135	129	143	ref|NM_023824|ens|ENSMUST00000024702|ref|XM_006525098|gb|AK044486	mm|chr17:23873842-23873783	0	NA	1817	GCCTACCAGAGACTTGTCTGCTCAGGAAATCTCTATACAGTGGGTGGCTCCAGCCTGCTG	19469	0	A_51_P109050	Paqr4	NM_023824	ref|Mus musculus progestin and adipoQ receptor family member IV (Paqr4), mRNA [NM_023824]	1.23473	0.101728	1.00348	0.115978	2.59636	3	0	0	0	0.900873	0.810419	0.929753	1.30143	1.11765	1.28513	0.91405	0.899288	0.830977	1.04874	0.871696	1.09
1513	8984	DATA	21399	131	79	ens|ENSMUST00000107485|gb|BC043039|gb|AK012753|gb|BC055715	mm|chr11:98662234-98662293	0	NA	1958	TGCCAAAGACCGACAGTCTTCCTTTACTGCACTTCACAAGGTTCTAAGATGTGGAGAGTT	19654	0	A_52_P370473	Msl1	ENSMUST00000107485	ens|male-specific lethal 1 homolog (Drosophila) [Source:MGI Symbol;Acc:MGI:1921276] [ENSMUST00000107485]	1.09434	0.0873404	0.992027	0.0216078	1.96953	2	0	0	0	0.954299	1.03094	1.03914	1.03772	1.05037	1.19492	1.15642	0.971054	0.589049	0.984778	1.01633	0.974975
1531	9062	DATA	21574	132	90	ref|NM_024284|ref|NM_001159626|ens|ENSMUST00000163132|ens|ENSMUST00000118788	mm|chr17:25001260-25001319	0	NA	1055	GACTTCTAACCGACTGGCCTGCTGCTAATGCAGGACAGTCTACTTTTCAGTTAATTCAGA	19676	0	A_51_P127469	Hagh	NM_024284	ref|Mus musculus hydroxyacyl glutathione hydrolase (Hagh), transcript variant 1, mRNA [NM_024284]	1.17515	0.0928501	0.965449	0.0988667	2.67799	3	0	0	0	0.99277	0.886072	0.913762	1.10334	1.28001	1.14211	1.12273	0.9193	0.743562	0.852106	1.01031	1.03394
1532	9070	DATA	21588	132	104	ref|NM_009068|ens|ENSMUST00000163843|ens|ENSMUST00000167374|ref|XM_006516607	mm|chr13:34126830-34126889	0	NA	4285	TCAGACCTGAGTGTCATTGTCCACATCATGGAAAAACAAGATGGCCACCAGAACACTGAA	19702	0	A_55_P2506630	Ripk1	NM_009068	ref|Mus musculus receptor (TNFRSF)-interacting serine-threonine kinase 1 (Ripk1), mRNA [NM_009068]	1.21258	0.145979	0.961929	0.0422043	2.85694	2	0	0	0	1.10244	1.06291	1.04756	1.08144	1.18643	1.36986	0.807959	0.99562	0.459997	0.975455	0.995713	0.91462
1536	9085	DATA	21617	132	133	ref|NM_011235|ref|NM_001277938|ref|NM_001277941|ref|NM_001277942	mm|chr11:82692302-82692243	0	NA	1334	ATTGTGTGAGATCTCATGGAGCCCCTGGCCAGGGGATGCTGCAGTGAGAGAGACCTAGAA	19754	0	A_55_P1982593	Rad51d	NM_011235	ref|Mus musculus RAD51 homolog D (Rad51d), transcript variant 1, mRNA [NM_011235]	1.17329	0.118984	0.944397	0.0306195	3.2269	2	0	0	0	0.822739	1.02731	0.962618	1.12409	1.0868	1.30899	1.00243	1.09867	0.733161	0.957489	0.966293	0.909408
1538	9094	DATA	21637	132	153	ref|NM_013784|ens|ENSMUST00000186485|ens|ENSMUST00000070699|ref|XM_006529675	mm|chr1:107415081-107415022	0	NA	6694	GCACATCCCTGTCTGTGCAGTATGGAGTTTCATCTCTTTTGCATCCTCAACCTGAAAAAA	19792	0	A_55_P2492783	Pign	NM_013784	ref|Mus musculus phosphatidylinositol glycan anchor biosynthesis, class N (Pign), mRNA [NM_013784]	1.10129	0.0632872	0.979341	0.0145656	3.25249	2	0	0	0	1.01037	1.01254	0.905448	1.05356	1.07723	1.17308	0.900518	0.993607	0.935623	0.993015	0.964023	0.980984
1541	9117	DATA	21694	133	46	ref|NM_029669|ens|ENSMUST00000025208|ref|XM_006526343|ref|XM_006526345	mm|chr18:35830819-35830761	0	NA	5106	CTGACCCATGGCGTTTGGAGTGAGTTTTAACAAAGTGAACATTAAACGATTTTACATACC	19890	0	A_55_P2897085	Dnajc18	NM_029669	ref|Mus musculus DnaJ (Hsp40) homolog, subfamily C, member 18 (Dnajc18), mRNA [NM_029669]	1.06182	0.071735	1.2271	0.0522281	3.22629	3	0	0	0	1.1479	0.914861	0.674418	1.01007	1.03168	1.14371	0.930785	1.01681	0.448444	1.20222	1.28712	1.19198
1569	9303	DATA	22182	136	42	ref|NM_009643|ens|ENSMUST00000092956|ref|XM_006527253|ref|XM_006527254	mm|chr19:9093549-9093608	0	NA	17962	GTCCTGAGAAAAGTTCCGATTTCTTTTAACAAATGTCATCATGATTAAGGAAATGTCTGG	20173	0	A_52_P263095	Ahnak	NM_009643	ref|Mus musculus AHNAK nucleoprotein (desmoyokin) (Ahnak), transcript variant 1, mRNA [NM_009643]	0.924539	0.0552623	1.17457	0.145936	2.77523	2	0	0	0	1.28488	0.898093	0.776897	0.988274	0.889962	0.895382	0.970927	1.21553	0.556342	1.12608	1.05906	1.33858
1594	9499	DATA	22627	138	159	ref|NM_025590|ens|ENSMUST00000140541|ens|ENSMUST00000102762|ref|XM_006503181	mm|chr4:106420171-106420113	0	NA	2662	ATGTCCAGCAAGATCATGCCTTCTCTGTCTGGAAGAGGCAACAGTTTGGAGATCCTGTCG	20679	0	A_55_P2739022	Acot11	NM_025590	ref|Mus musculus acyl-CoA thioesterase 11 (Acot11), mRNA [NM_025590]	1.33124	0.046074	0.969579	0.103607	5.52451	2	0	0	0	0.843268	0.739054	1.0369	1.38099	1.29003	1.32271	0.879034	0.82816	0.77112	1.07235	0.865159	0.971223
1598	9521	DATA	22677	139	45	ref|NM_013463|gb|U34071|gb|AK145148|gb|AK040081	mm|chrX:131122954-131122895	0	NA	2785	GATCTGATGCCCTCTTCTGGTTCTCTAGACAGCAACATTATACTTGCATAATAATCTTTT	20767	0	A_55_P2146136	Gla	NM_013463	ref|Mus musculus galactosidase, alpha (Gla), mRNA [NM_013463]	1.01822	0.0635934	1.14495	0.0525229	2.66134	3	0	0	0	1.30961	1.04124	0.903309	0.994119	1.09034	0.970194	0.816036	0.970194	0.470118	1.1023	1.12893	1.20361
1604	9550	DATA	22751	139	119	gb|BC008626|gb|AK151681|gb|AK168275|gb|AK172321	mm|chr9:20833186-20833245	0	NA	2439	CTGTGGGAGGGTAAGCAACCCTCCCAGCACAGAAACCTTTCCTTTGAATCAATAAAGTTT	20897	0	A_51_P408506	Icam1	BC008626	gb|Mus musculus intercellular adhesion molecule 1, mRNA (cDNA clone MGC:6195 IMAGE:3588949), complete cds. [BC008626]	1.55377	0.167551	0.738136	0.0405361	8.19511	2	0	0	0	0.860696	0.810017	0.985438	1.51179	1.41119	1.73831	0.781956	0.706788	0.979401	0.755426	0.691822	0.767161
1620	9648	DATA	22947	140	151	ref|NM_010499|ens|ENSMUST00000060427|gb|M59821|gb|M31042	mm|chr8:87185245-87185211	0	NA	1239	CTGAACTGAACCAATCAAATCTGCGCAGAGTTGAAGTGGCTGGAGACCCCGGGACTGGTC	20956	0	A_51_P481325	Ier2	NM_010499	ref|Mus musculus immediate early response 2 (Ier2), mRNA [NM_010499]	2.35665	0.204826	0.597469	0.0453398	14.5244	2	0	0	0	0.568084	0.505438	0.688155	2.55258	2.14396	2.37342	0.460233	0.45964	0.456081	0.648527	0.561914	0.581966
1622	9660	DATA	22980	141	20	ref|NM_028102|ens|ENSMUST00000033975|ref|XM_006509200|ref|XM_011242162	mm|chr8:26862637-26862578	0	NA	446	TTTTACAAGGGAGACAAAGACAATAAGTATGTCCCCTACTCGGAGAGCTTCAGCCAAGTC	21013	0	A_52_P118100	Ddhd2	NM_028102	ref|Mus musculus DDHD domain containing 2 (Ddhd2), mRNA [NM_028102]	1.14984	0.0577559	0.971157	0.0185862	5.10106	2	0	0	0	1.07719	1.06656	0.897147	1.11188	1.21631	1.12134	0.930782	0.761987	0.90333	0.949763	0.983337	0.980369
1627	9691	DATA	23057	141	97	ref|NM_153548|ens|ENSMUST00000022976|ref|XM_006520759|ref|XM_011245562	mm|chr15:59163612-59163553	0	NA	3957	CTTATGTTCTAAGGATCTGTTTGTGCAACTCCAGACCTTCAGTAAAACAGCATTGCTAGT	21148	0	A_55_P1963339	E430025E21Rik	NM_153548	ref|Mus musculus RIKEN cDNA E430025E21 gene (E430025E21Rik), mRNA [NM_153548]	1.20731	0.196082	1.04991	0.0161602	1.38567	2	0	0	0	1.15607	0.978959	0.566815	1.08415	1.10435	1.43342	1.00361	0.997981	0.524923	1.06855	1.03987	1.0413
1629	9698	DATA	23081	141	121	ref|NM_053214|ens|ENSMUST00000173372|ens|ENSMUST00000087605|ens|ENSMUST00000173426	mm|chr17:33744604-33744663	0	NA	3727	CCTGGGAGCAAAGTGCTGTGCACTGCCCAGAGTTAGGAGACGTGGACAGTTAGACCTTTC	21190	0	A_66_P112305	Myo1f	NM_053214	ref|Mus musculus myosin IF (Myo1f), mRNA [NM_053214]	1.40652	0.224719	0.912615	0.196431	2.8662	3	0	0	0	0.762877	0.693345	1.14474	1.45291	1.16223	1.60443	1.02267	0.826133	0.592827	0.746025	0.862604	1.12922
1631	9701	DATA	23091	141	131	ref|NM_001042719|ref|NM_001284399|ref|NM_176845|ref|NM_001039106	mm|chr14:46215242-46215183	0	NA	2804	CTTGGATGTCGCTCTTTTTCTTTTAACATTCATGTACAAACACGAGCATGATACCGAGGC	21208	0	A_52_P247491	Ddhd1	NM_001042719	ref|Mus musculus DDHD domain containing 1 (Ddhd1), transcript variant 3, mRNA [NM_001042719]	1.17595	0.105069	0.904276	0.0272444	4.33512	2	0	0	0	0.930315	0.967193	1.01411	1.05622	1.25278	1.21884	0.957251	0.901401	0.989056	0.873401	0.924938	0.914489
1646	9778	DATA	23266	142	142	ref|NM_153104|ens|ENSMUST00000054173|gb|BC141532|gb|AJ457190	mm|chr11:95692092-95692151	0	NA	547	TGTCTACGAGACCATCCCCCTGTCGCCAGGCATGGGCGATTTGTTGCAGTTCATAGCCAA	21231	0	A_51_P149257	Phospho1	NM_153104	ref|Mus musculus phosphatase, orphan 1 (Phospho1), mRNA [NM_153104]	1.42665	0.479297	0.919285	0.249635	1.62613	3	0	0	0	1.03902	1.11434	0.514056	1.97955	1.12907	1.17132	1.20222	0.611223	0.481345	1.124	0.641182	0.992673
1647	9790	DATA	23292	143	4	ref|NM_026006|ens|ENSMUST00000054984|gb|AK012928|gb|AK011898	mm|chr18:32070313-32070254	0	NA	1244	CGACTGGCGCTCGGTCGCCTAAATCGCGGGACTGGCCTAGCCAACGCGCTCCCGGTGTGA	21280	0	A_55_P2057102	Sft2d3	NM_026006	ref|Mus musculus SFT2 domain containing 3 (Sft2d3), mRNA [NM_026006]	1.17008	0.0434598	0.875426	0.136479	3.5632	2	0	0	0	0.977293	1.10433	0.989691	1.18577	1.20352	1.12096	0.927932	0.970013	0.894212	0.928684	0.720348	0.977245
1657	9863	DATA	23464	144	12	ref|NM_008946|ens|ENSMUST00000018430|ens|ENSMUST00000128870|gb|AK167123	mm|chr11:70341093-70341152	0	NA	768	CTAGGGAGTAGTAAAGGATGGTCCATACCGACGCAGAAGCTAATAAACAGTTTGTTAAAG	21295	0	A_55_P2035657	Psmb6	NM_008946	ref|Mus musculus proteasome (prosome, macropain) subunit, beta type 6 (Psmb6), mRNA [NM_008946]	0.997374	0.101631	1.21185	0.0364915	3.44025	2	0	0	0	1.02301	0.941838	0.812128	1.06556	1.046	0.880565	1.08023	1.01446	0.500651	1.18292	1.19979	1.25285
1690	10066	DATA	23943	146	163	ref|NM_010500|ens|ENSMUST00000055322|gb|AK150461|gb|AK146609	mm|chr1:156944837-156944778	0	NA	1929	TACAGACGAGCTCTAAGTGGAAGGACCTTATGGCTTTGTAGATAAGGTGACTCCAGTCTT	21867	0	A_51_P456941	Ier5	NM_010500	ref|Mus musculus immediate early response 5 (Ier5), mRNA [NM_010500]	1.28138	0.237711	0.95288	0.0752179	2.28207	2	0	0	0	1.34164	0.720905	1.04913	1.15764	1.13107	1.55544	0.782338	0.743924	0.659274	1.02852	0.878088	0.952036
1710	10196	DATA	24235	148	127	ref|NM_001163379|ref|NM_018862|ens|ENSMUST00000114140|ens|ENSMUST00000037489	mm|chr17:34750307-34750366	0	NA	2102	GGTTGGTTTTTATTATCTGGATAACAGCAAGCAACTGAAAATAAAGAGAAAGAGAGACGT	22099	0	A_55_P2055107	Agpat1	NM_001163379	ref|Mus musculus 1-acylglycerol-3-phosphate O-acyltransferase 1 (lysophosphatidic acid acyltransferase, alpha) (Agpat1), transcript variant 1, mRNA [NM_001163379]	1.22812	0.119327	0.97952	0.0398351	3.42284	2	0	0	0	0.834424	0.803493	1.05674	1.34979	1.22329	1.11129	0.901565	0.919091	0.861756	0.981938	1.01809	0.938531
1721	10266	DATA	24397	149	125	ref|NM_008668|ref|NM_001122895|ens|ENSMUST00000026469|gb|AK171180	mm|chr10:127098068-127098009	0	NA	2480	CCTGTCGAACACTTAGCGTGTCTTTCTTTTCAGATTGTGTACAGTAGATTATTTATTTTG	22391	0	A_55_P2071059	Nab2	NM_008668	ref|Mus musculus Ngfi-A binding protein 2 (Nab2), transcript variant 1, mRNA [NM_008668]	1.33482	0.145734	0.907593	0.0102308	5.06516	2	0	0	0	0.924075	0.745052	1.05247	1.2301	1.27311	1.50126	0.884281	0.886426	0.780449	0.896509	0.916674	0.909595
1724	10274	DATA	24415	149	143	ref|NM_001109914|ens|ENSMUST00000167323|gb|AK085884|riken|D830023L12	mm|chr6:134936562-134936621	0	NA	2991	CAAAAACTGAAAGCACATTTGAATAATTCGCTGTTTGTCTGTATTATGAGGGATTAGCTT	22425	0	A_66_P109183	Apold1	NM_001109914	ref|Mus musculus apolipoprotein L domain containing 1 (Apold1), mRNA [NM_001109914]	1.99137	0.453563	0.658599	0.05224	5.05611	2	0	0	0	0.513095	0.534267	0.63128	1.79372	2.51022	1.67017	0.743814	0.867059	0.760578	0.710287	0.659685	0.605824
1747	10459	DATA	24862	152	98	ref|NM_001017433|ref|NM_001017419|ens|ENSMUST00000035894|ens|ENSMUST00000126831	mm|chr10:60651527-60651586	0	NA	1465	GCCTCCAACAGTACTAAATAAAATCCTGCCCTCCCTCTTGGATGAGGGCAGTTCCACCCT	22640	0	A_55_P1979191	Tbata	NM_001017433	ref|Mus musculus thymus, brain and testes associated (Tbata), transcript variant 1, mRNA [NM_001017433]	1.1693	0.206237	0.783816	0.169908	2.49869	3	0	0	0	1.30434	1.20861	0.853406	1.11355	0.996668	1.39768	1.08281	1.25279	0.438691	0.588632	0.864195	0.898619
1765	10553	DATA	25049	153	121	ref|NM_019840|ref|NM_001177980|ref|NM_001177981|ref|NM_001177982	mm|chr4:102279393-102279452	0	NA	3896	AAATAAACAACACTACATTTGATCACAGATGATACTGAGTATCCCCAAACTACTGACTTG	22969	0	A_65_P01319	Pde4b	NM_019840	ref|Mus musculus phosphodiesterase 4B, cAMP specific (Pde4b), transcript variant 1, mRNA [NM_019840]	1.41469	0.284019	0.883185	0.0831284	3.11083	2	0	0	0	1.08558	0.743173	0.94172	1.08828	1.55037	1.60543	0.91435	0.96979	0.45175	0.818964	0.853513	0.977078
1774	10592	DATA	25139	154	47	ref|NM_001037801|ref|NM_009852|ens|ENSMUST00000039043|ens|ENSMUST00000025572	mm|chr19:10863950-10863891	0	NA	2795	GGTTATTGCAGCCAAGACCTTAAACAGGTCCTCCCCACAGCGTCAGAGAACTGGAGGGTC	22831	0	A_51_P313320	Cd6	NM_001037801	ref|Mus musculus CD6 antigen (Cd6), transcript variant 1, mRNA [NM_001037801]	1.24382	0.150829	0.96234	0.10744	2.63278	3	0	0	0	0.982448	0.739784	1.09677	1.10925	1.21537	1.40685	1.1101	0.753626	0.69877	0.977492	0.848128	1.0614
1788	10661	DATA	25304	155	48	gb|CA325710|nap|NAP093810-001	mm|chr8:128891019-128891078	0	NA	477	TTGCAGATGACCAGTGTCCTATGCTGTTCTTATGAATAAACTCAGGCAAGATCTGTAAAA	23125	0	A_55_P2147816	CA325710	CA325710	gb|UI-M-FZ0-ccr-c-16-0-UI.r1 NIH_BMAP_FZ0 Mus musculus cDNA clone IMAGE: 6823337 5', mRNA sequence [CA325710]	0.992302	0.0561338	1.2069	0.0894318	3.52023	3	0	0	0	1.21003	0.934994	0.669134	1.02007	1.02914	0.927696	1.04395	1.08096	0.463327	1.14539	1.16582	1.30949
1809	10793	DATA	25634	157	50	ref|NM_001272024|ref|NM_011351|ref|NR_073550|ref|NR_073549	mm|chr3:94977887-94977946	0	NA	4054	TGGGGTGGGAGAGGGAACTTTTGGAGAAATAAAACGAAGCTGCTGCGTGATTTGAATTTC	23421	0	A_55_P2156126	Sema6c	NM_001272024	ref|Mus musculus sema domain, transmembrane domain (TM), and cytoplasmic domain, (semaphorin) 6C (Sema6c), transcript variant 1, mRNA [NM_001272024]	1.02011	0.0524418	1.24948	0.108938	3.28596	2	0	0	0	1.13582	0.848691	0.838596	1.00927	1.07713	0.973938	0.75784	0.905893	0.704376	1.36912	1.22331	1.15601
1824	10877	DATA	25846	158	98	ref|NM_009026|ens|ENSMUST00000062405|gb|AK038932|gb|AF009246	mm|chr11:59777281-59777222	0	NA	1010	GACCTTTTTTGTTCAAAAGTCAAATCGGATTCCTGGACTAGCGGTCCGTGCCACAGGAGC	23505	0	A_52_P496726	Rasd1	NM_009026	ref|Mus musculus RAS, dexamethasone-induced 1 (Rasd1), mRNA [NM_009026]	1.38725	0.314003	0.743037	0.172359	3.11507	3	0	0	0	1.68767	1.26324	0.583925	1.21394	1.74972	1.1981	0.827228	1.24676	0.000309	0.55406	0.891593	0.783459
1844	10967	DATA	26067	159	155	ref|NM_146112|ref|NM_001110212|ens|ENSMUST00000027475|ens|ENSMUST00000174671	mm|chr1:89347288-89347347	0	NA	5645	GGGATAGTTAAAATGTTTACAAAACTTTAAGCTCCCTCGGAACTTTTGCCAGTGTGGAGG	23902	0	A_55_P2039712	Gigyf2	NM_146112	ref|Mus musculus GRB10 interacting GYF protein 2 (Gigyf2), transcript variant 1, mRNA [NM_146112]	1.12489	0.0618091	0.997893	0.048932	2.79024	3	0	0	0	0.974006	0.944961	0.991132	1.09685	1.08207	1.19575	0.945562	0.82172	0.954275	0.974506	1.05413	0.965042
1860	11017	DATA	26173	160	97	ens|ENSMUST00000136330|gb|AK046153|tc|TC1767749|tc|TC1629707	mm|chr2:145737523-145737582	0	NA	205	TTTTTGGGTGAGTAAAGACTTTAATACAGGTTTCAGTCTGCTTTACTCTAGAATGTGATG	23801	0	A_52_P38317	Naa20	ENSMUST00000136330	ens|N(alpha)-acetyltransferase 20, NatB catalytic subunit [Source:MGI Symbol;Acc:MGI:1915127] [ENSMUST00000136330]	1.07221	0.0765277	1.32704	0.113452	3.22532	3	0	0	0	1.32842	1.19046	0.626067	1.16019	1.03534	1.0211	0.360326	0.96494	0.332035	1.19612	1.38849	1.39651
1888	11161	DATA	26560	162	156	ref|NM_025960|ens|ENSMUST00000136873|ens|ENSMUST00000108455|ens|ENSMUST00000002112	mm|chr7:20101428-20101487	0	NA	701	ATGGAGGGACATTAGGGCATCACCCAGATGACAGATGTTCAGTAAAGGTTCTTTATGTGC	24196	0	A_55_P2106250	Trappc6a	NM_025960	ref|Mus musculus trafficking protein particle complex 6A (Trappc6a), mRNA [NM_025960]	1.11262	0.0371472	1.0166	0.0599302	2.3588	3	0	0	0	0.993849	1.07179	0.9579	1.12269	1.14369	1.07147	0.957582	0.874072	0.757158	1.05684	1.04523	0.94772
1918	11373	DATA	27163	166	103	ref|NM_028617|ens|ENSMUST00000034272|ref|XM_006509762|ref|XM_006509764	mm|chr8:74071861-74071920	0	NA	997	CTCTCACAGAAGTCTGTGTCTAGAGGCCACATATGCACCAGCAGTAAACGCTACCTGGGA	24690	0	A_51_P146303	Mvb12a	NM_028617	ref|Mus musculus multivesicular body subunit 12A (Mvb12a), mRNA [NM_028617]	1.24102	0.165693	1.00411	0.0353292	2.42198	2	0	0	0	1.01595	0.967108	0.832049	1.24124	1.07521	1.4066	0.98847	0.916401	0.544631	1.03516	0.965674	1.01151
1922	11397	DATA	27207	166	147	ref|NM_025616|ens|ENSMUST00000134263|ens|ENSMUST00000151990|ens|ENSMUST00000081946	mm|chr7:29091522-29091465	0	NA	893	GTCCGGACGGTGCTGGAGCACTATGCTCTAGAGGATGACCCACTGGAGGCATTCAAACTA	24767	0	A_52_P682990	Timm50	NM_025616	ref|Mus musculus translocase of inner mitochondrial membrane 50 (Timm50), mRNA [NM_025616]	1.18456	0.0558069	0.936161	0.0327868	6.64706	3	0	0	0	0.977198	0.90426	0.929201	1.12075	1.20863	1.22429	1.03317	1.01968	0.774334	0.969512	0.903969	0.935001
1923	11400	DATA	27214	166	154	ref|NM_025606|ens|ENSMUST00000167199|gb|BC029009|gb|AK009687	mm|chr19:11849223-11849282	0	NA	910	GAGTGAGTGACTTCTGAAAAACTGTGTCACCTGGTTGATTCTAATTAAAGTTTGAATGTA	24779	0	A_55_P2754974	Mrpl16	NM_025606	ref|Mus musculus mitochondrial ribosomal protein L16 (Mrpl16), mRNA [NM_025606]	1.10674	0.0102477	1.03535	0.0495309	2.44453	2	0	0	0	0.929622	0.927026	0.946683	1.09512	1.11448	1.11062	0.942677	0.938449	0.889268	1.06062	0.978284	1.06715
1924	11411	DATA	27242	167	18	ref|NM_027133|ref|NM_001110209|ens|ENSMUST00000134641|ens|ENSMUST00000127168	mm|chr2:74359841-74359782	0	NA	1744	ACCCACTTTGACATAGGAACAAATTTGGCTAGGAATAATTTCTTCCATAGTATTTAAGGG	24828	0	A_52_P205714	Lnp	NM_027133	ref|Mus musculus limb and neural patterns (Lnp), transcript variant 1, mRNA [NM_027133]	1.47662	0.271633	0.836194	0.312872	2.67718	3	0	0	0	1.3308	1.46089	0.844935	1.22493	1.44037	1.76456	0.000492	1.42395	0.000492	0.484678	0.939728	1.08418
1929	11463	DATA	27392	168	4	ref|NM_008525|ref|NM_001276446|ens|ENSMUST00000137448|ens|ENSMUST00000107444	mm|chr4:62170290-62170231	0	NA	1263	AAGAATGAAGAAAAAGTTTCGGACTTGATCTCGACCAAGTTCCCTGGGCCTTACAGAAGG	24805	0	A_55_P2798408	Alad	NM_008525	ref|Mus musculus aminolevulinate, delta-, dehydratase (Alad), transcript variant 1, mRNA [NM_008525]	1.24657	0.0410837	1.09059	0.0965605	2.57461	2	0	0	0	0.862216	1.11525	0.846741	1.29358	1.21754	1.2286	0.878716	0.879126	0.40646	1.16035	0.980382	1.13104
1937	11519	DATA	27538	168	150	ref|NM_011573|ref|NM_001286498|ref|NM_001081654|ref|NR_104459	mm|chr9:106561190-106561131	0	NA	1775	GAAGGAGCCAGAGACTGTTATCTGCACCAGCCTCCTGGGCTGCCAACTTTGCAGACTCTT	25068	0	A_51_P274504	Tex264	NM_011573	ref|Mus musculus testis expressed gene 264 (Tex264), transcript variant 1, mRNA [NM_011573]	1.11615	0.00523764	0.970189	0.00588705	32.0827	3	0	0	0	1.00615	0.926699	0.98049	1.11091	1.12138	1.11615	1.0093	0.962158	0.8562	0.963729	0.971586	0.975252
1947	11587	DATA	27702	169	150	ref|NM_011386|ref|NM_001039090|ref|NM_001271772|ens|ENSMUST00000118470	mm|chr3:31021022-31021081	0	NA	6242	TAGAGTTTGGGATAAATGTAGTCACCATTAGTTTCTCTGCTGGAAGGACTTACCTTGGTA	25366	0	A_55_P2904840	Skil	NM_011386	ref|Mus musculus SKI-like (Skil), transcript variant 1, mRNA [NM_011386]	1.30166	0.0298449	0.88735	0.0743625	8.95583	2	0	0	0	0.945786	0.74847	0.98379	1.32893	1.30628	1.26978	1.02716	0.847021	0.88073	0.804938	0.907676	0.949436
1950	11610	DATA	27753	170	37	gb|AK035396|tc|TC1677196|tc|TC1603280|riken|9530030H05	mm|chr7:18125402-18125459	0	NA	1775	TAGAGAAAAATGAGCTTAAAAATCCGGAGCAAAAGAGGGGTGGTCCCTGAGAAGTCAGTG	25163	0	A_55_P2088720	AK035396	AK035396	gb|Mus musculus adult male urinary bladder cDNA, RIKEN full-length enriched library, clone:9530030H05 product:unclassifiable, full insert sequence. [AK035396]	1.16583	0.0327056	0.803665	0.109271	5.49958	2	0	0	0	1.39092	1.06853	0.869287	1.20121	1.1367	1.15958	1.13002	0.826545	0.806207	0.720566	0.762989	0.92744
1968	11705	DATA	28000	171	120	ref|NM_207649|ref|NM_001286653|ref|NM_001286654|ref|NM_030598	mm|chr17:44158001-44158060	0	NA	746	TGGAAGCCTATCAGCGATGCCACACCAGTCCTCAACTATGACCTTCTTTATGCTGTGGCC	25606	0	A_52_P369415	Rcan2	NM_207649	ref|Mus musculus regulator of calcineurin 2 (Rcan2), transcript variant 1, mRNA [NM_207649]	1.17642	0.0468913	0.97864	0.0500253	4.99608	3	0	0	0	0.989685	0.868076	1.1356	1.14751	1.15122	1.23052	0.986813	0.813716	0.740933	1.02919	0.977566	0.929161
2000	11910	DATA	28473	174	101	ref|NM_175471|ens|ENSMUST00000106756|ens|ENSMUST00000106758|ref|XM_006502948	mm|chr4:106757340-106757399	0	NA	1534	TGACCATGTTCTCAGATCAAGGCACTGCCCTGAATCATCTCTGTATCCATGACAAGTCTT	25863	0	A_52_P18775	Cyb5rl	NM_175471	ref|Mus musculus cytochrome b5 reductase-like (Cyb5rl), mRNA [NM_175471]	1.33807	0.340353	1.05219	0.0386668	1.44554	2	0	0	0	0.914605	0.845275	0.73838	1.20534	1.08408	1.72479	1.03491	0.864867	0.431197	1.08075	1.00819	1.06763
2029	12126	DATA	29012	177	148	ref|NM_008176|ens|ENSMUST00000031327|gb|AK140312|gb|J04596	mm|chr5:91322080-91322139	0	NA	887	CGCTCGGGACAGAGACGTTCAAAGGACTGTTACAAATGAAGTAAAAATAAAAGTTTTATT	26533	0	A_55_P2811679	Cxcl1	NM_008176	ref|Mus musculus chemokine (C-X-C motif) ligand 1 (Cxcl1), mRNA [NM_008176]	2.7219	0.576385	0.467648	0.103282	6.66788	2	0	0	0	0.531314	0.492482	0.465906	2.55361	2.24839	3.3637	0.279925	0.300909	0.360829	0.582454	0.438206	0.382283
2041	12199	DATA	29201	179	9	gb|AK013311|gb|AK005177|gb|BY705366|tc|TC1658007	mm|chr19:33466351-33466410	0	NA	8	CCCACTGACTGGGATTTTCTCTCAGAGCGACTGGGTGGCCCGCCTACTTCACCGAGGAGA	26577	0	A_66_P138399	2810449D17Rik	AK013311	gb|Mus musculus 10, 11 days embryo whole body cDNA, RIKEN full-length enriched library, clone:2810449D17 product:unclassifiable, full insert sequence. [AK013311]	1.38439	0.306858	0.777584	0.128745	3.15839	2	0	0	0	1.11503	1.22896	0.755158	1.08405	1.37175	1.69737	0.911039	0.867161	0.636726	0.766704	0.911424	0.654624
2054	12313	DATA	29490	180	134	ref|NM_010481|ens|ENSMUST00000172829|ens|ENSMUST00000025217|gb|AK137109	mm|chr18:35099885-35099067	0	NA	1699	TGCCAAAGATAAAGGCACTGGTCGTGAGCAACAGATTGTAATCCAGTCTTCTGGTGGATT	26802	0	A_52_P520687	Hspa9	NM_010481	ref|Mus musculus heat shock protein 9 (Hspa9), mRNA [NM_010481]	1.12399	0.0282002	0.979479	0.0852139	2.78866	2	0	0	0	0.904008	0.891103	1.03028	1.15492	1.09971	1.11735	0.983562	0.933657	0.946971	1.06214	0.984379	0.89192
2063	12371	DATA	29634	181	114	ref|NM_177759|ref|XM_006530340|ref|XM_006530343|gb|BC172040	mm|chr5:116576173-116576114	0	NA	1998	ACATTATTCATATGCCCCAGGAAGACTACATCAACTGGCTACAGAGCCGAGTCAACATTC	27058	0	A_55_P2744528	Ccdc60	NM_177759	ref|Mus musculus coiled-coil domain containing 60 (Ccdc60), mRNA [NM_177759]	1.58307	0.510898	0.960139	0.0915626	2.07875	2	0	0	0	1.63873	0.919767	0.619499	1.12751	1.48624	2.13545	1.19093	0.000725	0.000725	0.999484	0.85548	1.02545
2064	12379	DATA	29662	181	142	ref|NM_146202|ens|ENSMUST00000060783|gb|AK155155|gb|AK080841	mm|chr7:134486413-134486354	0	NA	2142	AGTGGGGAGTGAGGCCCAAGGGTAGGGTCTGGATCTCAGAGTAAACTGCCTTGTCTTCCT	27107	0	A_51_P256224	Zfp768	NM_146202	ref|Mus musculus zinc finger protein 768 (Zfp768), mRNA [NM_146202]	1.06668	0.0182542	0.937353	0.0867648	2.52644	2	0	0	0	0.942766	0.981365	1.0832	1.08377	1.06882	1.04745	1.04688	1.03036	0.903312	1.02908	0.856594	0.926386
2069	12442	DATA	29836	182	152	ref|NM_153572|ens|ENSMUST00000110508|ens|ENSMUST00000047257|ref|XM_006504828	mm|chr5:149700527-149700468	0	NA	1204	AACTTTCCGTGGGACATTGATGAGGCTCTGCGCAGGAGACTAGAGAAAAGGATTTACATT	27126	0	A_55_P2047788	Katnal1	NM_153572	ref|Mus musculus katanin p60 subunit A-like 1 (Katnal1), mRNA [NM_153572]	1.0983	0.0900595	0.919176	0.0221653	3.34507	2	0	0	0	0.908976	1.15525	1.02494	1.05759	1.03578	1.20152	1.00327	0.979257	0.875885	0.944263	0.90224	0.911025
2079	12497	DATA	29997	183	149	ref|NM_001285907|ref|NM_001285906|ref|NM_001285905|ref|NM_027353	mm|chr7:134337881-134337822	0	NA	966	TTGGTGTGTACCAGGAAACAAGGGAACGGTTGGCTATGCGACTGAAGGGTTTGGGGTGTC	27413	0	A_55_P2119864	Cd2bp2	NM_001285907	ref|Mus musculus CD2 antigen (cytoplasmic tail) binding protein 2 (Cd2bp2), transcript variant 1, mRNA [NM_001285907]	1.13479	0.111378	0.934402	0.130493	2.02303	3	0	0	0	1.02165	0.937158	0.9674	1.26141	1.09095	1.052	1.07078	0.912101	0.883345	0.786525	1.0334	0.983283
2080	12500	DATA	30003	183	155	ref|NM_130447|ref|NM_001048054|ens|ENSMUST00000100857|ref|XM_006506587	mm|chr6:134665842-134665783	0	NA	4755	CTGTCAGTCCTTCGTCACTAATGTCGTATCAGTTCTTGGAATCACGACTACCATGCTGAA	27425	0	A_66_P116252	Dusp16	NM_130447	ref|Mus musculus dual specificity phosphatase 16 (Dusp16), transcript variant A1, mRNA [NM_130447]	1.1553	0.067935	0.964612	0.0465581	4.01028	3	0	0	0	1.07099	0.923785	0.904713	1.11977	1.11249	1.23363	0.904713	0.967391	0.868678	0.911038	0.987517	0.99528
2087	12565	DATA	30163	184	151	ref|NM_026732|ens|ENSMUST00000024734|ref|XM_006524843|ref|XM_006524844	mm|chr17:45835317-45835376	0	NA	467	AAGGAGAGTATTCCAAGGTCCTGGCCATCGCTCAGAACTTTGTGTGAGCAGAGCGGCTCT	27418	0	A_51_P192751	Mrpl14	NM_026732	ref|Mus musculus mitochondrial ribosomal protein L14 (Mrpl14), mRNA [NM_026732]	1.1332	0.0317292	1.01997	0.0432151	3.65809	3	0	0	0	0.938847	0.853966	0.97101	1.10156	1.16502	1.13302	0.933288	0.946359	0.897031	1.02129	1.06251	0.976109
2089	12597	DATA	30209	185	33	ref|NM_021512|ens|ENSMUST00000126503|ens|ENSMUST00000057481|gb|AK172911	mm|chr2:90573346-90575609	0	NA	4748	TGCCAACAGTCACAACATTATACTGTCCCAGAAAATTCTTGACAAACTAGAAGACTACCA	27503	0	A_51_P306705	Nup160	NM_021512	ref|Mus musculus nucleoporin 160 (Nup160), mRNA [NM_021512]	1.34019	0.155925	0.963249	0.215208	2.45665	3	0	0	0	0.998987	0.688782	0.641427	1.51072	1.30493	1.2049	1.44354	1.31664	0.000319	1.12323	1.04794	0.718579
2097	12666	DATA	30384	186	44	ref|NM_080455|ens|ENSMUST00000109157|ref|XM_011239514|gb|AK013774	mm|chr2:169713711-169713770	0	NA	4819	CATGACTGTACATCTTACCTTATTGAATGGAAAGCTATTTTGCATCTGTTGAGCCCAATG	27525	0	A_52_P158431	Tshz2	NM_080455	ref|Mus musculus teashirt zinc finger family member 2 (Tshz2), mRNA [NM_080455]	1.13377	0.113672	0.942913	0.0707604	2.46886	3	0	0	0	1.11228	0.946603	0.719861	1.24583	1.13692	1.01855	1.03873	1.0905	0.861976	0.962314	1.00195	0.864476
2100	12681	DATA	30440	186	100	ref|NM_172790|ens|ENSMUST00000014642|gb|AK090124|tc|TC1690638	mm|chr10:127831003-127831062	0	NA	6555	TCCGTTCTGACTGTAAGTCCAGCTCACCTTTGCCTTCAATATGTAACCAAAGGAAAACTC	27629	0	A_55_P2106489	Ankrd52	NM_172790	ref|Mus musculus ankyrin repeat domain 52 (Ankrd52), mRNA [NM_172790]	1.2744	0.17047	1.01561	0.0253039	2.601	2	0	0	0	0.983885	0.9392	0.658516	1.32791	1.0836	1.4117	1.06663	1.02898	0.452761	0.99878	1.00333	1.04471
2126	12817	DATA	30794	188	126	ref|NM_011596|ens|ENSMUST00000037865|gb|AK160318|gb|BC112905	mm|chr5:125204765-125204824	0	NA	5284	CCTGACAGTATTGAACTCCCTTTTGCTAGTGACAAAATAAATGTATATTTTTGAGATGCC	27968	0	A_55_P2496884	Atp6v0a2	NM_011596	ref|Mus musculus ATPase, H+ transporting, lysosomal V0 subunit A2 (Atp6v0a2), mRNA [NM_011596]	1.08268	0.0451138	0.996552	0.0278401	2.81415	3	0	0	0	1.17199	0.814289	0.956831	1.03089	1.11344	1.10372	0.976484	0.950831	0.89187	0.997586	1.02386	0.968209
2128	12829	DATA	30829	188	161	ref|NM_025600|ref|NM_001294258|ref|NM_001294259|ref|NR_122115	mm|chr8:73999797-73999856	0	NA	1737	TATCTGGACCCAGACCAGAGAGGACCTGGACCTCCTAGAGGCCTCATTCTGGGAGAACTA	28029	0	A_51_P164495	Dda1	NM_025600	ref|Mus musculus DET1 and DDB1 associated 1 (Dda1), transcript variant 1, mRNA [NM_025600]	1.1103	0.0417864	0.936004	0.0612775	4.07024	3	0	0	0	1.06147	0.982889	1.05722	1.1054	1.07118	1.15432	0.979016	0.924473	0.856029	0.978697	0.865791	0.963523
2138	12919	DATA	31085	190	89	ref|NM_007570|ens|ENSMUST00000020692|gb|AK169710|gb|AK169269	mm|chr1:135972153-135972094	0	NA	2371	TTAAATCTTCAATTCTTTACTGTCCTTGTTCACTTTAGAAATGACAAACCCTAGAGCTGG	28189	0	A_52_P31543	Btg2	NM_007570	ref|Mus musculus B cell translocation gene 2, anti-proliferative (Btg2), mRNA [NM_007570]	2.02983	0.228968	0.826743	0.080385	8.58706	2	0	0	0	0.218822	0.810074	0.566531	1.84241	1.96205	2.28504	0.661111	0.680263	0.493469	0.848496	0.73772	0.894013
2143	12938	DATA	31148	190	152	ref|NM_030597|ref|NM_001204274|ref|NM_001110101|ref|NM_001204273	mm|chr17:35119567-35119626	0	NA	240	CTTCTACTCCTTTTTCAAGTCTCTTGTGGGCAAGGATGTAGTCGTGGAACTCAAGAATGA	28298	0	A_52_P434039	Lsm2	NM_030597	ref|Mus musculus LSM2 homolog, U6 small nuclear RNA associated (S. cerevisiae) (Lsm2), transcript variant 1, mRNA [NM_030597]	1.29396	0.165746	0.843217	0.195054	3.0501	3	0	0	0	1.44313	0.92382	0.513052	1.24046	1.16158	1.47985	0.000653	1.38573	1.32207	0.749393	1.06745	0.712805
2172	13134	DATA	31622	193	134	ref|NM_001081139|ens|ENSMUST00000048427|ref|XM_011240062|ref|XM_006501256	mm|chr3:96494165-96494224	0	NA	3261	GCAGGAGTGAGGCAGGCTCACTGTGTGCCCTCAGGGATAAAGGCATTTCTCTTTTGTGAG	28842	0	A_51_P406466	Ankrd35	NM_001081139	ref|Mus musculus ankyrin repeat domain 35 (Ankrd35), mRNA [NM_001081139]	1.58485	0.101626	0.956475	0.0995334	7.65122	3	0	0	0	0.656389	0.486025	1.00177	1.48761	1.69035	1.57659	1.06986	0.536925	0.625051	0.847646	0.978886	1.04289
2176	13162	DATA	31686	194	34	ref|NM_175643|ens|ENSMUST00000040523|ref|XM_011248901|gb|AK040370	mm|chr11:50617472-50617531	0	NA	3661	CAAAGAATCCAGGAGCTCATTAATGCAGTGCAGAGGAAAGAGAAGCCGGGAAAGTTCTAA	28660	0	A_51_P227222	Adamts2	NM_175643	ref|Mus musculus a disintegrin-like and metallopeptidase (reprolysin type) with thrombospondin type 1 motif, 2 (Adamts2), transcript variant 1, mRNA [NM_175643]	1.14043	0.0387676	0.831407	0.24795	2.13278	2	0	0	0	1.07675	0.924828	1.01813	1.15158	1.1724	1.09731	1.21987	1.05527	0.789633	0.935365	1.01046	0.5484
2185	13277	DATA	32007	196	27	ref|NM_025822|ens|ENSMUST00000160504|ens|ENSMUST00000162362|ens|ENSMUST00000182708	mm|chr3:66798460-66798519	0	NA	156	ACACTGAAGAGGAAAGCAGAAGCAAGAGGAAAAAGAAACACCGGAGGCGCTCGTCTTCAA	28939	0	A_66_P103999	Rsrc1	NM_025822	ref|Mus musculus arginine/serine-rich coiled-coil 1 (Rsrc1), mRNA [NM_025822]	1.18476	0.138706	0.948374	0.0987764	2.40438	3	0	0	0	0.944425	1.20215	0.704553	1.07144	1.33944	1.14338	1.06234	0.97871	0.708437	1.05497	0.859931	0.930225
2192	13325	DATA	32119	196	139	ref|NM_008654|ens|ENSMUST00000141691|ens|ENSMUST00000167273|ens|ENSMUST00000042105	mm|chr7:52778379-52778320	0	NA	2240	GAGGGAGGCGGGGCTAAGCCTGAGTAGTTTCCTATTATTTATTTATTTATTTATTTGAAT	29133	0	A_55_P2136880	Ppp1r15a	NM_008654	ref|Mus musculus protein phosphatase 1, regulatory (inhibitor) subunit 15A (Ppp1r15a), mRNA [NM_008654]	1.23365	0.13562	0.843758	0.0563947	4.59771	2	0	0	0	0.883213	1.00429	0.986787	1.08153	1.34192	1.27749	0.95368	0.970983	0.968835	0.903676	0.791715	0.835883
2204	13402	DATA	32304	197	160	ref|NM_144902|ens|ENSMUST00000153108|ens|ENSMUST00000120120|ens|ENSMUST00000029569	mm|chr3:116389988-116384144	0	NA	672	TTTGTACAGTGGCCTTCAGATTCTCAAGAGCTGAACTCTAAGGACCTTTCAACAGGCTCA	29465	0	A_55_P2800738	Slc35a3	NM_144902	ref|Mus musculus solute carrier family 35 (UDP-N-acetylglucosamine (UDP-GlcNAc) transporter), member 3 (Slc35a3), mRNA [NM_144902]	1.27844	0.206937	0.925253	0.118831	2.56353	3	0	0	0	0.946237	0.939725	1.07757	1.50586	1.22822	1.10123	1.07106	0.813169	0.541172	0.965774	1.01852	0.791462
2206	13426	DATA	32355	198	47	ref|NM_013642|ens|ENSMUST00000126178|ens|ENSMUST00000025025|gb|AK145903	mm|chr17:26642683-26642624	0	NA	1794	CCAGTGTAGGTTTGTAGCTTTCAGTTATCGACAGTTGTATGTTTGTTTATTTATGATCTG	29264	0	A_55_P2908530	Dusp1	NM_013642	ref|Mus musculus dual specificity phosphatase 1 (Dusp1), mRNA [NM_013642]	1.69498	0.232521	0.795701	0.0858432	6.28418	2	0	0	0	0.733305	0.542952	0.722803	1.51696	1.95806	1.60994	0.555076	0.686972	1.28684	0.864893	0.822575	0.699636
2210	13443	DATA	32407	198	99	ref|NM_145857|ens|ENSMUST00000054324|ens|ENSMUST00000109634|ref|XM_011248390	mm|chr8:91212170-91212224	0	NA	4412	AGCCTTTCTTTCTGAGCAAGGTCTTTCTGTGGTTTTTCAAAATGTCACCTTTGTAATTTT	29358	0	A_51_P181691	Nod2	NM_145857	ref|Mus musculus nucleotide-binding oligomerization domain containing 2 (Nod2), mRNA [NM_145857]	1.50462	0.41116	1.02404	0.134131	1.92464	2	0	0	0	0.933203	0.85807	0.918448	1.41262	1.14724	1.95398	0.492677	0.769068	0.442566	0.869221	1.09768	1.10522
2232	13592	DATA	32762	200	126	ref|NM_001285454|ref|NM_001285455|ref|NM_001038609|ref|NM_010838	mm|chr11:104189430-104189489	0	NA	1139	ATGGTGGACTCACCACAGCTTGCCACACTAGCCGATGAAGTGTCTGCTTCCTTGGCCAAG	29699	0	A_55_P1954486	Mapt	NM_001285454	ref|Mus musculus microtubule-associated protein tau (Mapt), transcript variant 3, mRNA [NM_001285454]	1.14485	0.0447033	0.92484	0.0361027	6.63164	3	0	0	0	1.02798	0.973414	1.00603	1.11715	1.19642	1.12097	0.950854	0.808333	1.02433	0.944452	0.883176	0.946891
2246	13680	DATA	32986	202	22	ref|NM_010444|ens|ENSMUST00000023779|ref|XM_006520459|ref|XM_006520458	mm|chr15:101105071-101105130	0	NA	2321	CTCTTCCGCTCTCCTTCCATGTGTACATAACTGTCACTCAAGAAGGTGATTGACAGATTC	29806	0	A_51_P239654	Nr4a1	NM_010444	ref|Mus musculus nuclear receptor subfamily 4, group A, member 1 (Nr4a1), mRNA [NM_010444]	3.2141	1.12237	0.219823	0.00650402	4.6207	2	0	0	0	0.27662	0.250981	0.230036	1.98989	3.45781	4.19458	0.220801	0.287258	0.432546	0.220469	0.22598	0.21302
2268	13820	DATA	33391	204	99	ens|ENSMUST00000145432|gb|AK089974|gb|AK170087|gb|AK166298	mm|chr16:94616995-94617054	0	NA	1978	CAGACTTCCTATTTGCTGTTATAAAAGCAGGTGTCAAACTACAAAAGAACTGAAATGGAA	30235	0	A_55_P2733632	Ttc3	ENSMUST00000145432	ens|tetratricopeptide repeat domain 3 [Source:MGI Symbol;Acc:MGI:1276539] [ENSMUST00000145432]	1.30742	0.060639	1.12278	0.074909	3.31835	3	0	0	0	1.58791	1.34181	0.311972	1.2509	1.2999	1.37147	0.429539	0.738877	0.299291	1.07057	1.20861	1.08916
2286	13949	DATA	33683	206	63	ref|NM_013613|ref|NM_001139509|ens|ENSMUST00000112627|gb|AK158607	mm|chr2:56960758-56960699	0	NA	2050	AAAGACCATGTGACTTTCAATAATGGGGGTTTGAACCGACCCAACTACCTGTCTAAACTG	30464	0	A_52_P494622	Nr4a2	NM_013613	ref|Mus musculus nuclear receptor subfamily 4, group A, member 2 (Nr4a2), transcript variant 1, mRNA [NM_013613]	2.21929	0.59921	0.729708	0.0710321	4.27577	2	0	0	0	0.214435	0.444606	0.642494	2.40724	2.70198	1.54863	0.573492	0.632815	0.645179	0.668908	0.712432	0.807785
2301	14063	DATA	33957	208	9	ref|NM_172457|ens|ENSMUST00000003438|gb|AK030481|gb|AK170394	mm|chr10:80148272-80148213	0	NA	2372	TTTTCCAGAGGCTGCCACTAAACTAAATGTGTACAGTTTAAGCTTGGTTGCCTGAGCCCA	30661	0	A_55_P2714000	Mob3a	NM_172457	ref|Mus musculus MOB kinase activator 3A (Mob3a), mRNA [NM_172457]	1.38625	0.136838	0.911936	0.32661	2.31996	2	0	0	0	0.706509	0.903098	0.816356	1.52847	1.37476	1.25552	1.36499	1.09348	0.221013	1.08484	1.11575	0.535223
2312	14183	DATA	34270	209	158	ref|NM_025527|ens|ENSMUST00000126518|ens|ENSMUST00000131713|ens|ENSMUST00000140279	mm|chr18:34495910-34495969	0	NA	532	TCCTGCTGGGAGAGACATGGCATCCTTGTGTCTGAGAGAACAGCTTTTTGTTTGTCATTT	31220	0	A_51_P514668	Srp19	NM_025527	ref|Mus musculus signal recognition particle 19 (Srp19), mRNA [NM_025527]	1.17684	0.0264472	0.992407	0.02723	8.4153	3	0	0	0	0.793071	0.925859	1.01439	1.14809	1.18228	1.20014	1.0269	0.900523	0.831534	1.00248	1.01316	0.961575
2346	14461	DATA	34922	213	154	ref|NM_026546|ens|ENSMUST00000042702|ref|XM_006520173|gb|AK003724	mm|chr15:31547065-31547124	0	NA	940	AAAGGTGCTCCTAGTGGGACATCCTGGATAGGGTGCATGAAGATATAAGTAAGGGACCGT	31805	0	A_52_P117966	Fam173b	NM_026546	ref|Mus musculus family with sequence similarity 173, member B (Fam173b), mRNA [NM_026546]	1.17723	0.101079	0.948684	0.0656081	3.28496	3	0	0	0	0.940864	0.93473	1.00135	1.06307	1.25535	1.21326	1.0518	0.945617	0.747892	0.92323	0.899617	1.0232
2351	14480	DATA	34963	214	31	ref|NM_001164885|ref|NM_022882|ens|ENSMUST00000135589|ens|ENSMUST00000156570	mm|chr17:71580723-71580782	0	NA	1258	TACTGAGCTTCCCGAATCACCTCTTGAAGCACCTCAGATTTCATCGTTATTAGATGCAGA	31587	0	A_55_P2729608	Lpin2	NM_001164885	ref|Mus musculus lipin 2 (Lpin2), transcript variant 1, mRNA [NM_001164885]	1.45071	0.234195	0.904231	0.172276	3.25563	3	0	0	0	0.419905	0.979022	0.945411	1.71982	1.3392	1.2931	0.844239	0.687881	1.05873	0.845261	1.09825	0.769183
2355	14498	DATA	35034	214	102	ref|NM_011427|ens|ENSMUST00000052631|gb|AK144478|gb|M95604	mm|chr2:167368073-167368132	0	NA	1347	GTTTCACAGCAGTTTAACTGTCTCAGAAGGGACCATGAATAATGGCCATCACTTGTTAGG	31711	0	A_51_P165087	Snai1	NM_011427	ref|Mus musculus snail family zinc finger 1 (Snai1), mRNA [NM_011427]	1.50412	0.575058	0.923449	0.179271	1.6697	2	0	0	0	1.44566	0.755842	0.491923	1.2143	1.13164	2.16642	0.883643	1.14008	0.000155	1.01325	0.717025	1.04007
2385	14716	DATA	35562	217	138	ref|NM_010345|ref|NM_001177629|ens|ENSMUST00000093321|ens|ENSMUST00000109653	mm|chr11:11833224-11833165	0	NA	2366	AGTGCAAGTGTGGGAAGAAACTGGAATGACGATTTTGATTAGGCCACGTAGGGTGAAAAC	32371	0	A_55_P1955457	Grb10	NM_010345	ref|Mus musculus growth factor receptor bound protein 10 (Grb10), transcript variant 1, mRNA [NM_010345]	1.20369	0.0315858	1.04841	0.172081	1.53724	2	0	0	0	0.668024	0.934297	1.08733	1.16955	1.20964	1.23188	1.02457	0.748784	0.780678	1.14527	1.15024	0.849734
2403	14858	DATA	35945	220	29	ref|NM_026987|ens|ENSMUST00000174366|ens|ENSMUST00000025292|ref|XM_006524873	mm|chr17:36029477-36029536	0	NA	3253	AGAAGAGCTGGGCTAGAGAGTGACATGGACCAAATCTTGCAGCTCTTTTTTCCTTCCATA	32472	0	A_51_P357685	Dhx16	NM_026987	ref|Mus musculus DEAH (Asp-Glu-Ala-His) box polypeptide 16 (Dhx16), mRNA [NM_026987]	1.16337	0.0809553	0.909889	0.189369	2.13184	2	0	0	0	0.975224	1.01695	0.905921	1.18647	1.23027	1.07338	0.991016	0.865225	1.02588	0.988829	1.04702	0.69382
2415	14914	DATA	36089	221	9	ref|NM_133795|ens|ENSMUST00000048578|ens|ENSMUST00000109278|gb|AK170032	mm|chr11:43543576-43543517	0	NA	1363	TCAGATGCTGCAGTGCAGGGGCTTCAGCATTCTTGAGTTCCTCCGTGTTAATAAAAACAT	32723	0	A_55_P1978451	Ttc1	NM_133795	ref|Mus musculus tetratricopeptide repeat domain 1 (Ttc1), mRNA [NM_133795]	1.10398	0.103836	0.923932	0.0596451	2.60431	3	0	0	0	0.994282	1.08663	1.06308	1.01101	1.08491	1.21603	1.10474	0.926366	0.741166	0.963318	0.953167	0.855309
2417	14918	DATA	36095	221	15	ref|NM_175016|ens|ENSMUST00000053657|ens|ENSMUST00000112279|ref|XM_006530291	mm|chr5:114574006-114573947	0	NA	1001	CTCCGCGGGTCAACTTGACTTTTCGGAAAATTTTACCTACTAAGAAATAAAATGTCTTTA	32733	0	A_55_P2037186	Alkbh2	NM_175016	ref|Mus musculus alkB, alkylation repair homolog 2 (E. coli) (Alkbh2), mRNA [NM_175016]	1.27816	0.128586	0.860059	0.181075	3.26072	3	0	0	0	0.933949	1.07104	0.75498	1.40781	1.27599	1.15066	0.883877	0.929673	1.01183	0.964618	0.964588	0.650972
2430	15008	DATA	36305	222	61	ref|NM_172612|ens|ENSMUST00000003451|gb|AK161870|gb|AK043639	mm|chr15:98500378-98500319	0	NA	1460	TGATGGGAGGGGTCACCAGACTTTCCTGCCCCTGGGGCGGTACAGTTGGCATTTGTTTTA	32814	0	A_51_P111164	Rnd1	NM_172612	ref|Mus musculus Rho family GTPase 1 (Rnd1), mRNA [NM_172612]	1.53913	0.182066	0.933955	0.0499871	5.55179	2	0	0	0	0.632808	0.572173	1.0782	1.49689	1.3819	1.73861	0.70165	0.707571	0.888332	0.947701	0.878533	0.97563
2438	15070	DATA	36434	223	26	ref|NM_001033270|ens|ENSMUST00000057015|ref|XM_011244749|ref|XM_011244751	mm|chr14:15614734-15618862	0	NA	3181	ATGGTTCTTGCATTAGTCTTTGTGCGCAAGCTCATGGATCTCTGTTTCACAAAGAGAGAA	33043	0	A_51_P279997	Slc4a7	NM_001033270	ref|Mus musculus solute carrier family 4, sodium bicarbonate cotransporter, member 7 (Slc4a7), mRNA [NM_001033270]	1.26589	0.119505	0.903085	0.324879	1.81532	2	0	0	0	0.796189	0.972971	1.01959	1.31413	1.35373	1.1298	1.06069	0.829364	0.814271	1.07444	1.10642	0.528402
2461	15200	DATA	36737	225	1	ens|ENSMUST00000086909|ens|ENSMUST00000187287|gb|AK143708|riken|F430011I10	mm|chr5:77087308-77087367	0	NA	1771	TCTGATGAGCTACCAGTTTGATGGCAGAGGCGAACAAAGGTTTCCCTCCCAGGGCTGGAG	33283	0	A_55_P2153361	C530008M17Rik	ENSMUST00000086909	ens|RIKEN cDNA C530008M17 gene [Source:MGI Symbol;Acc:MGI:2444817] [ENSMUST00000086909]	1.30229	0.151724	0.833021	0.212245	3.11537	3	0	0	0	0.901483	1.17515	0.896742	1.16343	1.46424	1.2792	0.975828	0.779464	0.865398	0.694452	1.07737	0.727245
2467	15237	DATA	36828	225	92	ref|NM_001271470|ref|NM_010249|ref|NR_073183|ens|ENSMUST00000103226	mm|chr2:126464829-126464770	0	NA	1533	GAAAGTGAATAGTGTCATCATTTTGTTTTGGCCTTAAACATATGGCAAGCCCTCAATAAA	33448	0	A_55_P2500841	Gabpb1	NM_001271470	ref|Mus musculus GA repeat binding protein, beta 1 (Gabpb1), transcript variant 6, mRNA [NM_001271470]	1.48736	0.0915567	1.145	0.0772408	4.95038	3	0	0	0	0.83997	0.691098	0.411415	1.58058	1.39756	1.48395	1.25347	0.906553	0.00041	1.14113	1.2241	1.06977
2468	15238	DATA	36831	225	95	ens|ENSMUST00000182747|gb|AK038327|riken|A130096B02	mm|chr17:71821938-71821879	0	NA	2730	TTTGATGGAAGCATTGTCTCTGTGAGGCTTTCTCTTCCTAGACTAGCTTGTGCGAAGTTG	33453	0	A_55_P2718279	Smchd1	ENSMUST00000182747	ens|SMC hinge domain containing 1 [Source:MGI Symbol;Acc:MGI:1921605] [ENSMUST00000182747]	1.3931	0.214486	1.06326	0.0789651	2.49954	2	0	0	0	1.07598	1.06811	0.665456	1.50276	1.53059	1.14596	0.392505	0.731706	0.697143	0.972759	1.11812	1.09891
2470	15262	DATA	36877	225	141	ref|NM_011063|ens|ENSMUST00000013842|ref|XM_006496702|gb|AK153141	mm|chr1:174127029-174126970	0	NA	2307	CTTCTCAGAAGCTTCTCTGTAAGGCAAAAACCAAACTTTAAACAGACTAACCTGCCCTAA	33531	0	A_51_P495540	Pea15a	NM_011063	ref|Mus musculus phosphoprotein enriched in astrocytes 15A (Pea15a), transcript variant 2, mRNA [NM_011063]	1.06257	0.0098707	0.959427	0.0731977	2.41871	2	0	0	0	0.996127	0.989417	1.06423	1.07367	1.05478	1.05925	1.04708	0.943438	0.893731	0.94468	0.894725	1.03887
2517	15692	DATA	37984	232	100	ref|NM_001083927|ref|NM_009389|ref|NM_001083928|ens|ENSMUST00000162583	mm|chr9:61265959-61266018	0	NA	4856	TTTTATAATGTGGGACTCCGTCTGGGAAGGAAGATGAGGGTGTCTAAAACCTTCCCATCT	34337	0	A_55_P2906207	Tle3	NM_001083927	ref|Mus musculus transducin-like enhancer of split 3, homolog of Drosophila E(spl) (Tle3), transcript variant 1, mRNA [NM_001083927]	1.13845	0.0900442	1.00853	0.0427675	2.25742	2	0	0	0	1.07206	0.972267	1.00482	1.23568	1.05793	1.12175	0.868187	0.872042	0.769676	1.00439	0.967984	1.05322
2546	15908	DATA	38485	235	109	ens|ENSMUST00000142640|ens|ENSMUST00000127998|ens|ENSMUST00000151385|tc|TC1654068	mm|chr11:101178390-101178649	0	NA	331	CTTCTAATTATAATTTCAAGGTTGATTCTTTCAGAGAGCGGATCACAAGTGAGGCAGAAG	34935	0	A_66_P111369	Psme3	ENSMUST00000142640	ens|proteaseome (prosome, macropain) activator subunit 3 (PA28 gamma, Ki) [Source:MGI Symbol;Acc:MGI:1096366] [ENSMUST00000142640]	1.28972	0.0689037	0.980548	0.0764646	5.20253	3	0	0	0	0.902059	0.814922	1.04748	1.33235	1.21022	1.32658	1.06242	0.848991	0.513336	0.949467	1.06766	0.924518
2574	16083	DATA	38912	238	44	ref|NM_001301211|ref|NM_009677|ens|ENSMUST00000173200|ens|ENSMUST00000034171	mm|chr8:112302838-112326881	0	NA	355	TGGTTTCCTTCGAGGTTTCGGGCCGAGGATGCCAGCCCCCATCAGATTGCGGGAGCTGAT	35113	0	A_55_P2924831	Ap1g1	NM_001301211	ref|Mus musculus adaptor protein complex AP-1, gamma 1 subunit (Ap1g1), transcript variant 2, mRNA [NM_001301211]	1.22042	0.0655267	0.992187	0.0633221	4.33827	3	0	0	0	1.12608	0.824929	0.975073	1.1524	1.22574	1.28313	0.914239	0.823203	0.698644	0.936243	0.979388	1.06093
2578	16119	DATA	39007	238	139	ref|NM_031165|ens|ENSMUST00000199391|ens|ENSMUST00000117405|ens|ENSMUST00000192935	mm|chr9:40612755-40613050	0	NA	1812	ATCAGCTGGCTGGATAAGAACCAGAGTGCAGAGAAGGAAGAATTTGAGCATCAGCAGAAA	35281	0	A_55_P2069721	Hspa8	NM_031165	ref|Mus musculus heat shock protein 8 (Hspa8), mRNA [NM_031165]	1.11209	0.0357685	0.969469	0.0321414	5.13709	3	0	0	0	1.02313	0.909912	0.92571	1.10401	1.15121	1.08106	0.981004	0.948279	0.967275	0.982509	0.932857	0.993041
2580	16122	DATA	39013	238	145	ref|NM_013528|ens|ENSMUST00000146410|ens|ENSMUST00000032057|ens|ENSMUST00000113658	mm|chr6:87027139-87027198	0	NA	1485	GGGATCACAAATACAGTCGGCAGTTCTATATCAAGGGAGACAGATTGCGGGGTTCATATT	35292	0	A_52_P479435	Gfpt1	NM_013528	ref|Mus musculus glutamine fructose-6-phosphate transaminase 1 (Gfpt1), mRNA [NM_013528]	1.56191	0.216949	1.02592	0.249928	2.80513	3	0	0	0	0.572635	0.675588	1.07753	1.55607	1.78173	1.34795	0.000554	1.43862	0.471574	1.22589	0.745731	1.10614
2585	16155	DATA	39077	239	45	ref|NM_001290726|ref|NM_001172205|ref|NM_001172206|ref|NM_001290727	mm|chr1:36377312-36377371	0	NA	2231	CTCAAGGCATCCAGGTTGGCCATGAAAGACCCAATAAAAAGACACTGGTGTGATTGCACT	35406	0	A_55_P2125208	Arid5a	NM_001290726	ref|Mus musculus AT rich interactive domain 5A (MRF1-like) (Arid5a), transcript variant 5, mRNA [NM_001290726]	1.50095	0.121128	0.854988	0.0708756	7.97229	3	0	0	0	0.901485	0.758936	0.909744	1.6075	1.52613	1.36921	0.907909	0.98836	0.465762	0.924122	0.858353	0.78249
2589	16191	DATA	39175	239	143	ref|NM_001001984|ens|ENSMUST00000075856|ref|XM_006531722|ref|XM_006531723	mm|chr19:4318196-4318137	0	NA	5215	TCCAGGTGGGGGAAACAGAAGACTGGTTGAATCCCCACCTGCCTCTCTAAGCCAGGCTTT	35579	0	A_52_P92557	Kdm2a	NM_001001984	ref|Mus musculus lysine (K)-specific demethylase 2A (Kdm2a), mRNA [NM_001001984]	1.15418	0.037377	0.952674	0.102712	3.19314	2	0	0	0	1.01476	0.99819	0.966557	1.11468	1.18899	1.15886	0.873266	0.905802	0.920866	1.02731	0.835533	0.995178
2597	16274	DATA	39401	241	41	ref|NM_207209|ens|ENSMUST00000001079|ref|XM_006502467|ref|XM_006502469	mm|chr3:129686230-129686171	0	NA	4574	GGAATGAGGTTGACTAATGCATATTATGAATTGAGTCCACAAAAGAAACATGAGACTTTG	35687	0	A_55_P1999878	Sec24b	NM_207209	ref|Mus musculus Sec24 related gene family, member B (S. cerevisiae) (Sec24b), mRNA [NM_207209]	1.23035	0.100761	0.891156	0.266336	2.06317	2	0	0	0	1.10923	1.01449	0.802735	1.34439	1.19331	1.15336	0.861037	1.11766	0.73033	1.13021	0.939179	0.604076
2598	16275	DATA	39404	241	44	ref|NM_001190830|ref|NM_010589|ens|ENSMUST00000051995|ens|ENSMUST00000130624	mm|chr8:74210801-74210860	0	NA	3223	ACGTGTGGAGCTTCGGAGTGGTGTTGTACGAGCTCTTCACCTACTGCGACAAGAGCTGCA	35693	0	A_55_P2010912	Jak3	NM_001190830	ref|Mus musculus Janus kinase 3 (Jak3), transcript variant 2, mRNA [NM_001190830]	1.20855	0.185607	0.946717	0.168948	1.80691	3	0	0	0	1.20639	1.04146	0.717793	1.42281	1.10582	1.09702	0.811244	1.07901	0.678303	0.991805	1.08855	0.7598
2609	16361	DATA	39635	242	111	ref|NM_001102458|ref|NM_018745|ref|NM_001301688|ref|NR_125913	mm|chr15:38419711-38419652	0	NA	2501	GAAGACCAGTGTGACTTCATTAGATACGTTTAGTGTATTTAGGATGTGTAAATTTGTGCT	35810	0	A_55_P2902743	Azin1	NM_001102458	ref|Mus musculus antizyme inhibitor 1 (Azin1), transcript variant 1, mRNA [NM_001102458]	1.10312	0.193504	0.870931	0.0728483	1.94506	2	0	0	0	1.26318	0.894648	1.0168	0.984652	0.998291	1.32642	1.03869	0.998205	0.866327	0.84287	0.953637	0.816286
2633	16548	DATA	40054	245	38	ref|NM_178595|ens|ENSMUST00000066352|gb|AK075833|gb|BC098218	mm|chr2:32633011-32633070	0	NA	810	CCGTTCGCTATTTGCGGTGTAGGAAAGGTCTAGGAAGGGTAAACTTTCTGAACCTTTTGA	36267	0	A_52_P605812	Ptrh1	NM_178595	ref|Mus musculus peptidyl-tRNA hydrolase 1 homolog (S. cerevisiae) (Ptrh1), mRNA [NM_178595]	1.34285	0.239943	0.865601	0.158847	2.87265	3	0	0	0	0.868634	0.628823	0.909755	1.53142	1.42437	1.07278	1.29492	0.96596	0.706538	0.949415	0.964987	0.682401
2643	16610	DATA	40198	246	18	ref|NM_148928|ref|NM_001290484|ens|ENSMUST00000028157|ens|ENSMUST00000113889	mm|chr2:28421978-28421919	0	NA	2591	GGGCGATGGCCATTCCTGCCATAGGTTGGACAGACTAGAAGGACTTCCTGAAGTCTAGCC	36234	0	A_51_P105810	Gtf3c5	NM_148928	ref|Mus musculus general transcription factor IIIC, polypeptide 5 (Gtf3c5), transcript variant 2, mRNA [NM_148928]	1.12148	0.0532745	0.892345	0.149324	2.50323	2	0	0	0	1.20658	0.995407	0.973924	1.06684	1.17328	1.12431	1.00742	0.966807	0.808393	0.895109	1.04027	0.741658
2653	16699	DATA	40379	247	35	ref|NM_029896|ens|ENSMUST00000020490|ref|XM_011242916|gb|AK037620	mm|chr9:106093154-106093213	0	NA	3429	TCTGATATGACAGCTGGCACTGCACTGTTCAACCACCAGCCACTGGGGTATTTTTTAATA	36558	0	A_51_P118603	Wdr82	NM_029896	ref|Mus musculus WD repeat domain containing 82 (Wdr82), mRNA [NM_029896]	1.07241	0.0448303	0.916578	0.0610614	3.56309	3	0	0	0	1.2445	0.977657	1.06484	1.08986	1.02148	1.10589	1.02886	1.00406	0.71312	0.977427	0.855306	0.917001
2664	16799	DATA	40600	248	92	ref|NM_001163215|ref|NM_001205270|ref|NM_008010|ref|NM_001163217	mm|chr5:34079649-34079708	0	NA	4176	GGCAGATGTGGTTTTGTTAACACAACCAACTTACTTTCCAAAAAATAAAGAGATAACTGG	36663	0	A_55_P1996578	Fgfr3	NM_001163215	ref|Mus musculus fibroblast growth factor receptor 3 (Fgfr3), transcript variant 2, mRNA [NM_001163215]	1.47287	0.435842	0.959665	0.0757508	2.00938	2	0	0	0	0.957685	1.06056	0.484454	1.96972	1.29382	1.15508	0.658849	0.746211	0.794623	0.929078	1.04593	0.903991
2668	16825	DATA	40652	248	144	gb|AK014426|tc|TC1675611|riken|3830408E23|nap|NAP115659-1	mm|chr16:59491423-59491482	0	NA	1675	CTAGTTACAGCTGAAGTAGTTTCTCTGAAACAAGTTTCCTACTTCTGACGGATATTAAAA	36758	0	A_55_P2073895	Mina	AK014426	gb|Mus musculus 18 days pregnant adult female placenta and extra embryonic tissue cDNA, RIKEN full-length enriched library, clone:3830408E23 product:hypothetical protein, full insert sequence. [AK014426]	1.68017	0.257831	0.968517	0.0574311	4.66637	2	0	0	0	2.24786	0.790035	0.456644	1.69802	1.41388	1.92862	0.000606	0.558177	0.000606	0.981483	0.905712	1.01836
2678	16883	DATA	40787	249	115	ref|NM_177766|ens|ENSMUST00000152080|ref|XM_006509684|gb|BC115554	mm|chr8:75008598-75007872	0	NA	991	ATGATGATCGCCATTCTGGGTGTCTTCCTGTACAACAAGACCAAGTATGATGCGAATCAG	36996	0	A_55_P2743512	Slc35e1	NM_177766	ref|Mus musculus solute carrier family 35, member E1 (Slc35e1), mRNA [NM_177766]	1.03812	0.0393489	1.43285	0.211408	3.1794	2	0	0	0	1.26886	1.18735	0.747914	1.06157	1.0601	0.992691	0.000881	1.38121	0.000881	1.21525	1.44582	1.63747
2681	16898	DATA	40832	249	160	ref|NM_001291044|ref|NM_153561|ens|ENSMUST00000133894|ens|ENSMUST00000052645	mm|chr3:37304060-37304001	0	NA	926	GAGCTGCCGGAGAGTTACAAAGCCGCAACGGGAGCAGACTGAATACCAGATTTCAACCTG	37077	0	A_55_P2741356	Nudt6	NM_001291044	ref|Mus musculus nudix (nucleoside diphosphate linked moiety X)-type motif 6 (Nudt6), transcript variant 1, mRNA [NM_001291044]	1.08672	0.0488316	0.943007	0.0504063	3.54693	3	0	0	0	1.11976	0.945848	0.976538	1.05539	1.06179	1.14299	1.023	1.00041	0.845253	0.999556	0.902797	0.926667
2688	16976	DATA	41004	251	4	ref|NM_025614|ens|ENSMUST00000019917|ens|ENSMUST00000121486|gb|AK012504	mm|chr10:33728859-33728800	0	NA	387	CTCCCAGGAAAATCTAGAAGACAATGATGTCTCAGACATTTTAAAATTACTGGCATTGCA	37091	0	A_55_P1965935	Rwdd1	NM_025614	ref|Mus musculus RWD domain containing 1 (Rwdd1), mRNA [NM_025614]	1.29223	0.0404171	0.957527	0.318946	1.80321	2	0	0	0	1.12328	1.05533	0.80615	1.2922	1.25183	1.33267	1.19926	0.440989	0.625708	1.17423	1.10706	0.591288
2691	16990	DATA	41033	251	33	ref|NM_172307|ens|ENSMUST00000065857|ens|ENSMUST00000058098|gb|AK077220	mm|chrX:153988943-153988884	0	NA	1609	ATTGGATTTTTCATCTTGCTTGGTGGCAGTGTACTTTTGGCTGCCAATGTGACACTGGGA	37145	0	A_55_P2185910	Mbtps2	NM_172307	ref|Mus musculus membrane-bound transcription factor peptidase, site 2 (Mbtps2), mRNA [NM_172307]	1.496	0.308959	0.685781	0.0705052	4.42832	2	0	0	0	0.882197	0.879576	0.77285	1.85001	1.35729	1.28071	0.75829	1.2842	0.877537	0.640645	0.649672	0.767026
2703	17117	DATA	41367	253	39	ref|NM_010234|ens|ENSMUST00000021674|gb|AK159667|gb|AK159688	mm|chr12:86818118-86818177	0	NA	1991	CCTGAGGTCTTTCGACATGTGGAAAGTGAATTTGAATGAAAAATTTTAAGCATTGTTTGC	37450	0	A_55_P2910184	Fos	NM_010234	ref|Mus musculus FBJ osteosarcoma oncogene (Fos), mRNA [NM_010234]	3.50862	0.546039	0.184273	0.104192	10.358	2	0	0	0	0.240457	0.15992	0.226678	3.42085	4.09323	3.01179	0.149339	0.144866	5.77e-05	0.287062	0.187022	0.0787336
2712	17167	DATA	41500	254	8	ens|ENSMUST00000194813|gb|CF617631	mm|chr16:32409024-32409083	0	NA	402	GACAAGATCATCCAGGAGGCTGACCAAGATGGAGATAGTGCCACATCTTTTACAGAATTC	37394	0	A_55_P2014457	ENSMUST00000194813	ENSMUST00000194813	ens|predicted gene, 20056 [Source:MGI Symbol;Acc:MGI:5012241] [ENSMUST00000194813]	1.68802	0.452567	0.934094	0.272	2.47309	3	0	0	0	0.689439	0.851228	0.919367	2.20276	1.35256	1.50872	0.930283	0.743216	0.000138	0.893973	1.22393	0.684383
2713	17171	DATA	41517	254	25	ref|NM_001025257|ref|NM_001287058|ref|NM_001287057|ref|NM_009505	mm|chr17:46162435-46162376	0	NA	1193	TGGACATCTTCCAGGAGTACCCCGACGAGATAGAGTACATCTTCAAGCCGTCCTGTGTGC	37424	0	A_52_P249424	Vegfa	NM_001025257	ref|Mus musculus vascular endothelial growth factor A (Vegfa), transcript variant 3, mRNA [NM_001025257]	1.36772	0.10137	0.949328	0.0769326	5.69454	3	0	0	0	0.805616	0.956719	1.12814	1.38791	1.25777	1.45748	0.835045	0.761721	0.561619	0.884996	0.92844	1.03455
2733	17325	DATA	41920	256	100	ref|NM_001162945|ens|ENSMUST00000076169|ref|XM_006517711|ref|XM_006517712	mm|chr13:93618923-93618982	0	NA	631	AAGTGAGTTTTCCCAAAGTTCACTTACAGAAGCATCTGAAACAGCTCTGCAACCTGTGCC	37842	0	A_55_P2165999	Mtx3	NM_001162945	ref|Mus musculus metaxin 3 (Mtx3), mRNA [NM_001162945]	1.10139	0.307085	0.746565	0.112076	1.88	2	0	0	0	1.07616	0.94759	1.51074	0.899825	0.949519	1.45481	1.87814	1.04273	0.000771	0.864274	0.641134	0.734286
2739	17380	DATA	42069	257	85	ref|NM_026042|ens|ENSMUST00000003536|gb|AK013006|gb|BC023192	mm|chr7:29171812-29171753	0	NA	615	GGCAGCCTCTGAGGTCTTTCGGGGAGGGGCAAAGAATGAAGTATGGCCTGAGGCAAAACA	38099	0	A_55_P2036894	Med29	NM_026042	ref|Mus musculus mediator complex subunit 29 (Med29), mRNA [NM_026042]	1.16877	0.0490188	1.02232	0.0754771	2.81858	3	0	0	0	0.814829	0.863145	1.1176	1.21468	1.11714	1.17449	1.04873	0.840793	0.741632	1.06522	0.935168	1.06657
2763	17568	DATA	42493	260	17	ref|NM_145937|ens|ENSMUST00000032191|gb|AK151874|gb|AK161203	mm|chr6:108057132-108057073	0	NA	2483	CATTCAGGGTGTGTGATATATTACACCAGAGAGATACGAGAAATCTGGTTGATTTTGCGA	38266	0	A_51_P494686	Sumf1	NM_145937	ref|Mus musculus sulfatase modifying factor 1 (Sumf1), mRNA [NM_145937]	1.21659	0.0244309	0.982926	0.132981	2.99331	2	0	0	0	1.01278	1.02247	0.824392	1.1981	1.24429	1.20737	1.09681	0.705407	0.739597	1.11382	0.987009	0.847951
2764	17569	DATA	42495	260	19	ref|NM_010480|ens|ENSMUST00000145255|ens|ENSMUST00000119417|ens|ENSMUST00000121455	mm|chr12:111932796-111932511	0	NA	791	TTCCCATTATTTTCTTTGTGGAGAAGGAACGAGATAAGGAAGTCAGTGATGATGAGGCTG	38270	0	A_55_P2796341	Hsp90aa1	NM_010480	ref|Mus musculus heat shock protein 90, alpha (cytosolic), class A member 1 (Hsp90aa1), mRNA [NM_010480]	1.51534	0.104877	0.834167	0.332958	3.37979	2	0	0	0	0.80539	0.998402	0.894147	1.53564	1.60859	1.4018	1.03041	0.5327	0.690413	1.00779	1.04442	0.450283
2765	17585	DATA	42546	260	70	ref|NM_145359|ens|ENSMUST00000143873|ens|ENSMUST00000037843|gb|BC064081	mm|chr16:4874809-4874763	0	NA	1093	TCGCTCTTCAAAACAACCTAGTTTATGGGGCAGCTGGACTTTGCATGTTAGAGTGAGCCC	38360	0	A_52_P54856	Ubald1	NM_145359	ref|Mus musculus UBA-like domain containing 1 (Ubald1), mRNA [NM_145359]	1.16606	0.0420683	0.998188	0.0437201	4.79221	3	0	0	0	1.11354	0.806476	0.979339	1.20569	1.17057	1.12191	0.836119	1.0288	0.743002	1.03105	0.948568	1.01494
2781	17681	DATA	42786	261	146	ref|NM_011145|ens|ENSMUST00000002320|gb|AK141550|gb|BC070398	mm|chr17:28438298-28438357	0	NA	3101	AGTCTCCAAATCTGAAATGTATATTTTTGCTAGGAGCCCCAGCTTCCCGTGTTTTTAATA	38797	0	A_66_P124715	Ppard	NM_011145	ref|Mus musculus peroxisome proliferator activator receptor delta (Ppard), mRNA [NM_011145]	1.16834	0.0828736	1.0168	0.0399873	2.85257	2	0	0	0	0.779047	0.87817	1.00824	1.25306	1.16451	1.08745	0.995372	0.933018	0.850747	1.03743	1.04225	0.970706
2788	17723	DATA	42904	262	100	ref|NM_172753|ref|NM_001252623|ens|ENSMUST00000130214|ens|ENSMUST00000078350	mm|chr8:70882017-70881958	0	NA	2605	ACCAAAGTCTCAGACCAAGCAGAGGATCTATGTGAGAAATGGAGATCTCTGACATTAGCG	38720	0	A_51_P260312	Csgalnact1	NM_172753	ref|Mus musculus chondroitin sulfate N-acetylgalactosaminyltransferase 1 (Csgalnact1), transcript variant 2, mRNA [NM_172753]	1.23149	0.0878916	1.01371	0.0180135	4.20434	2	0	0	0	1.04492	1.00555	0.799335	1.15984	1.20507	1.32956	0.870947	0.959798	0.583833	0.99438	1.01673	1.03003
2795	17738	DATA	42932	262	128	gb|AK155189|gb|BY533185|tc|TC1656976|riken|F630207E10	mm|chr9:7188180-7188239	0	NA	1320	AGGAATTGCACTGACTTTTAGTGATCTGGTTTAAAGAAAACCAATACATCAACCTTCATG	38766	0	A_65_P18813	AK155189	AK155189	gb|Mus musculus NOD-derived CD11c +ve dendritic cells cDNA, RIKEN full-length enriched library, clone:F630207E10 product:unclassifiable, full insert sequence. [AK155189]	1.22924	0.0986633	1.00074	0.0823073	3.0803	3	0	0	0	1.00012	0.807295	0.726842	1.19978	1.33928	1.14867	0.439722	1.25458	1.0815	0.991635	0.923361	1.08722
2800	17763	DATA	42997	263	29	ref|NM_028105|ref|NM_001277296|ref|NM_001277297|ens|ENSMUST00000166940	mm|chr12:89699931-89699990	0	NA	2074	GTCACAGGGGCGTGTTTAACTTGTAGGGAATAAGTAGAAACTCAGAACCTGCAGAGAACA	38880	0	A_51_P247481	Adck1	NM_028105	ref|Mus musculus aarF domain containing kinase 1 (Adck1), transcript variant 3, mRNA [NM_028105]	1.13823	0.0806886	0.985832	0.07882	2.3402	3	0	0	0	0.907724	0.85859	0.967839	1.23137	1.09398	1.08936	1.1331	1.13171	0.628833	1.02071	1.0412	0.895591
2823	17902	DATA	43338	265	42	ref|NM_019408|ref|NM_001177369|ref|NM_001177370|ens|ENSMUST00000111881	mm|chr19:46386440-46386499	0	NA	3064	AAATCTTATTTAAACCTCAAGCCCACATCTCGGTGGGTCAAATAAAGGGGAAGACCCCTC	39191	0	A_55_P2723699	Nfkb2	NM_019408	ref|Mus musculus nuclear factor of kappa light polypeptide gene enhancer in B cells 2, p49/p100 (Nfkb2), transcript variant 1, mRNA [NM_019408]	1.15986	0.0556077	0.991325	0.0729412	3.18262	3	0	0	0	1.05936	0.775803	0.95919	1.11199	1.14673	1.22086	1.01963	1.10498	0.627488	1.07524	0.943084	0.955654
2824	17903	DATA	43339	265	43	ref|NM_027982|ens|ENSMUST00000002298|ref|XM_006502123|ref|XM_006502122	mm|chr3:104588336-104588395	0	NA	1272	GCAGTATGAGCACTGTCCAGATGATGTGCTGGTCCTGGGAACAGATGGCTTGTGGGATGT	39193	0	A_51_P399175	Ppm1j	NM_027982	ref|Mus musculus protein phosphatase 1J (Ppm1j), mRNA [NM_027982]	1.17231	0.102668	0.975997	0.0334191	3.14927	2	0	0	0	0.999543	0.762885	1.07045	1.28713	1.14046	1.08935	1.00998	1.06793	0.644286	0.95923	1.01448	0.954281
2837	17983	DATA	43551	266	91	ref|NM_029748|ens|ENSMUST00000151969|ens|ENSMUST00000173937|ens|ENSMUST00000174819	mm|chr4:129284913-129284972	0	NA	550	CACAATAAGAAACATACTCTCCATAGTGCCAAGGCTACACAGAAACCCTGCCTCAAAAAA	39281	0	A_51_P392529	Tmem234	NM_029748	ref|Mus musculus transmembrane protein 234 (Tmem234), mRNA [NM_029748]	0.998066	0.035936	1.10983	0.078272	2.24769	2	0	0	0	1.30459	1.02762	0.747182	1.03923	0.982044	0.972928	0.861216	0.939779	0.795912	1.05249	1.07801	1.19901
2843	18032	DATA	43662	267	38	ref|NM_008448|ens|ENSMUST00000163210|ens|ENSMUST00000164426|ens|ENSMUST00000025083	mm|chr18:6223976-6223638	0	NA	1225	AGGGCAGTACCTATGTTCCTTATCGAGATAGTAAAATGACCAGAATTCTTCAAGATTCAT	39480	0	A_52_P273177	Kif5b	NM_008448	ref|Mus musculus kinesin family member 5B (Kif5b), mRNA [NM_008448]	1.1542	0.0364974	0.889377	0.0807999	5.17358	2	0	0	0	1.07321	0.933593	0.890068	1.15735	1.11623	1.18902	1.12883	1.13472	0.708838	0.884928	0.97231	0.810894
2854	18161	DATA	43975	269	23	ref|NM_026748|ens|ENSMUST00000200393|ens|ENSMUST00000198615|ens|ENSMUST00000072607	mm|chr5:140227547-140227488	0	NA	6801	CGTGTACGGCCAGATTGACACCAGCGCCCAGATATCAGAGGCCCTGAAGATCCTACACAT	39754	0	A_51_P295708	Ints1	NM_026748	ref|Mus musculus integrator complex subunit 1 (Ints1), mRNA [NM_026748]	1.16004	0.0663329	0.951179	0.0449202	4.5156	3	0	0	0	0.960869	1.02923	0.975692	1.22379	1.09139	1.16493	0.984758	0.947342	0.768465	0.987852	0.964611	0.901076
2873	18324	DATA	44375	271	95	ref|NM_011785|ens|ENSMUST00000111159|ens|ENSMUST00000111160|gb|AK052953	mm|chr1:178952306-178952247	0	NA	4674	TAGGGACACACATTACTTCCTTCGTACAGACAGCTTAAATAAAGCCCTATGTCAATCTGC	40171	0	A_55_P1961873	Akt3	NM_011785	ref|Mus musculus thymoma viral proto-oncogene 3 (Akt3), mRNA [NM_011785]	1.18395	0.0997343	0.957609	0.0983073	2.79946	3	0	0	0	1.19459	1.05577	0.702639	1.11753	1.13569	1.29864	0.864287	0.961458	0.796566	0.847681	0.988054	1.03709
2874	18325	DATA	44377	271	97	ens|ENSMUST00000136065|gb|AK156750|gb|AK045789|riken|F830047L08	mm|chr16:30386045-30385986	0	NA	2183	AAGTTAAAGGCATCCTCAGCTACAGACTTAGTTTAGGGATGACCTGGGCTACATGAGACT	40175	0	A_55_P2722443	Atp13a3	ENSMUST00000136065	ens|ATPase type 13A3 [Source:MGI Symbol;Acc:MGI:2685387] [ENSMUST00000136065]	1.5146	0.184358	0.984562	0.169903	3.66184	3	0	0	0	1.31838	0.960863	0.678423	1.63062	1.61117	1.30202	0.244947	0.757831	0.542066	0.810004	1.14939	0.994289
2882	18397	DATA	44548	272	104	ref|NM_007634|ens|ENSMUST00000115390|ref|XM_006523554|gb|AK162447	mm|chr17:24378344-24377781	0	NA	681	AATCTTTTTGAGGACGAAGAGAAAAGGAAGCAGGCGCGTAGCCTTTTGGAAGAGTCTTCT	40189	0	A_55_P2737582	Ccnf	NM_007634	ref|Mus musculus cyclin F (Ccnf), mRNA [NM_007634]	1.79706	0.672925	0.584667	0.510733	2.48572	3	0	0	0	1.07052	1.3924	1.20932	1.66974	1.19689	2.52455	1.18135	0.000621	0.000621	0.947514	0.805866	0.000621
2883	18401	DATA	44557	272	113	ref|NM_148926|ens|ENSMUST00000057897|ref|XM_006524027|ref|XM_006524028	mm|chr17:30345295-30345353	0	NA	946	TTTCTGGCTGGTTACTAAGGTGCCTGCTAGCCATTGTATAAAATTAAAACATGAAGAATG	40205	0	A_55_P2797956	Zfand3	NM_148926	ref|Mus musculus zinc finger, AN1-type domain 3 (Zfand3), mRNA [NM_148926]	1.10486	0.033136	1.0237	0.0702946	1.80886	2	0	0	0	0.930065	0.870858	1.08356	1.08958	1.08212	1.14288	1.02125	0.902152	0.806435	1.08098	0.945254	1.04487
2889	18421	DATA	44613	273	5	ref|NM_010120|ens|ENSMUST00000168382|ens|ENSMUST00000078079|ref|XM_006525626	mm|chr18:46768754-46768813	0	NA	1753	CCACAGCTCAATGAAAACACGGTTCCTGTTTTCTAAATGGAGGCGCCCAGAAACACAATA	40299	0	A_66_P112853	Eif1a	NM_010120	ref|Mus musculus eukaryotic translation initiation factor 1A (Eif1a), mRNA [NM_010120]	1.22047	0.0823528	0.866701	0.0530487	6.25504	3	0	0	0	0.991955	0.955906	1.16029	1.16334	1.1832	1.31487	1.17189	0.962933	0.495519	0.922912	0.817515	0.859674
2902	18502	DATA	44793	274	21	ref|NM_181750|ens|ENSMUST00000190288|ens|ENSMUST00000036288|ens|ENSMUST00000188570	mm|chr1:130134253-130134312	0	NA	4752	GCTGTACAATGTGCTGATGCAAGCCTTTTTCAGTTCAAGAGAATAAATGTTTACAAATGT	40327	0	A_55_P1990440	R3hdm1	NM_181750	ref|Mus musculus R3H domain containing 1 (R3hdm1), mRNA [NM_181750]	1.2068	0.144647	0.931464	0.261456	1.59603	3	0	0	0	0.864892	1.06219	1.14917	1.1283	1.11838	1.37372	0.945921	0.818624	0.74442	1.04687	1.11536	0.632162
2903	18504	DATA	44798	274	26	ref|NM_170684|ens|ENSMUST00000131659|ens|ENSMUST00000037900|ens|ENSMUST00000134235	mm|chr8:125659024-125659083	0	NA	2343	CCTGGAGCCTGCGGGGCCTGGGAGACAGCTTAGGGTGTAATAAAGTATCCCTCATTCTCA	40336	0	A_55_P2150962	Cpne7	NM_170684	ref|Mus musculus copine VII (Cpne7), mRNA [NM_170684]	1.24294	0.0226819	1.02214	0.10766	3.47596	2	0	0	0	0.854925	0.876687	0.941972	1.22665	1.26884	1.23331	0.766768	0.625273	1.13916	1.14493	0.977502	0.943971
2913	18590	DATA	45033	275	97	ref|NM_030210|ens|ENSMUST00000031445|gb|AK043848|gb|AK147189	mm|chr5:125997524-125997583	0	NA	2924	CCTGGGCTCTTTCTATTGTGACTGTCCTCTACATTTGTAAATGAAGTCTCAGGCTTTGGC	40760	0	A_51_P453043	Aacs	NM_030210	ref|Mus musculus acetoacetyl-CoA synthetase (Aacs), mRNA [NM_030210]	1.28401	0.278031	0.873664	0.0505029	2.5152	2	0	0	0	1.22424	0.869957	0.941686	1.24314	1.02868	1.58022	0.793381	0.878681	0.81902	0.834068	0.856386	0.930539
2921	18648	DATA	45168	276	68	ref|NM_133500|ref|NM_001305805|ref|NM_133501|ens|ENSMUST00000071201	mm|chr2:29083158-29083099	0	NA	855	TGCAGCGAGAGAACCTCTACAAGTACTTCTATGCCATCTCCAATATCGAAGTCATTGGCA	40711	0	A_55_P2129360	Ntng2	NM_133500	ref|Mus musculus netrin G2 (Ntng2), transcript variant a, mRNA [NM_133500]	1.40813	0.30585	0.571285	0.360649	3.06518	3	0	0	0	1.77363	1.51532	0.293244	1.28635	1.75611	1.18192	1.10888	1.37055	0.000144	0.534034	0.949113	0.230706
2928	18687	DATA	45254	276	154	ref|NM_172967|ens|ENSMUST00000067556|ref|XM_011246936|ref|XM_006525966	mm|chr18:70627995-70627936	0	NA	1002	GGAAGACAGGATTCATCAGACATTAAGAATAGTCCAAGTTTTTATGTAGACGCTACTTCC	40866	0	A_52_P515907	4930503L19Rik	NM_172967	ref|Mus musculus RIKEN cDNA 4930503L19 gene (4930503L19Rik), mRNA [NM_172967]	1.39706	0.189208	1.07041	0.0757209	2.77621	2	0	0	0	0.900098	0.773314	1.12533	1.53198	1.18079	1.47842	0.782942	0.763822	0.252076	0.999085	1.06227	1.14987
2931	18700	DATA	45279	277	15	ref|NM_144783|ens|ENSMUST00000143043|gb|M55512|gb|DQ537939	mm|chr2:105013656-105013715	0	NA	2976	GGTATTAGCTGCATCACTGTGTGGATGTCAATCTTACAGTGTATTGATGATAATACTAAA	40911	0	A_55_P1953143	Wt1	NM_144783	ref|Mus musculus Wilms tumor 1 homolog (Wt1), mRNA [NM_144783]	1.2358	0.0866884	0.699075	0.107355	6.73723	3	0	0	0	1.47575	1.09421	0.730092	1.16018	1.33041	1.21682	0.855976	0.850218	1.18912	0.678121	0.815363	0.603742
2942	18804	DATA	45522	278	94	ref|NM_172530|ens|ENSMUST00000050401|gb|AK157580|riken|F830224M15	mm|chr3:89662699-89662758	0	NA	5675	GTGTGCCTTCCGGAAGATGGTTTACCCTGAAGTGTTACTTTCAATAAATGCTTTGCCAGG	41053	0	A_55_P1957468	She	NM_172530	ref|Mus musculus src homology 2 domain-containing transforming protein E (She), mRNA [NM_172530]	1.14235	0.0892732	0.968584	0.0736277	2.60095	3	0	0	0	1.21916	1.20439	0.680819	1.23981	1.06454	1.12272	0.90408	0.897142	0.761599	0.973034	0.892833	1.03989
2961	18937	DATA	45853	280	97	ens|ENSMUST00000145839	mm|chr11:79158626-79158685	0	NA	658	CCACAAAGATTTGTAAAAATTCAAACCTACTCTGGGTTAATAAAAAGGATCTATCCTCCC	41353	0	A_55_P2714742	Nf1	ENSMUST00000145839	ens|neurofibromatosis 1 [Source:MGI Symbol;Acc:MGI:97306] [ENSMUST00000145839]	1.3577	0.113623	0.977283	0.0640479	5.05176	3	0	0	0	1.28541	1.00196	0.606576	1.23569	1.37695	1.46048	0.665614	0.952839	0.482635	1.02962	0.905861	0.996372
2963	18949	DATA	45880	280	124	ref|NM_001040695|ens|ENSMUST00000094398|ens|ENSMUST00000131183|ens|ENSMUST00000198106	mm|chr7:54199218-54199159	0	NA	740	ATGAGCCAAGGGACGATGGACCTTGATATCTTCAACCTGCCTAATGTAGAGATCAGCAAA	41401	0	A_66_P105058	Uevld	NM_001040695	ref|Mus musculus UEV and lactate/malate dehyrogenase domains (Uevld), mRNA [NM_001040695]	1.77208	0.644133	0.79945	0.0837342	2.59355	2	0	0	0	1.22133	0.834083	0.644872	1.97864	1.05001	2.2876	0.629656	0.954764	0.000697	0.849066	0.702774	0.846511
2965	18986	DATA	45962	281	42	ref|NM_025635|ref|NM_001293684|ens|ENSMUST00000160337|ens|ENSMUST00000105431	mm|chr10:72131730-72131789	0	NA	1917	TTAGCAGATCTTCAGGATGGACGTAGTGAGATGCAGCAAACCTGTTCTTTGCCTGAAGAA	41543	0	A_52_P509710	Zwint	NM_025635	ref|Mus musculus ZW10 interactor (Zwint), transcript variant 1, mRNA [NM_025635]	1.21729	0.0748281	0.812721	0.241505	2.77155	2	0	0	0	1.09867	1.11161	0.869617	1.16445	1.18451	1.30292	1.0579	1.194	0.57817	0.836402	1.04151	0.560247
2966	18988	DATA	45966	281	46	gb|BC065788|tc|TC1738310	mm|chr8:74490078-74490137	0	NA	349	GGTAGCTGTGTCCCTCAAGAGAATCATTGGATATCAGGAAAATATTAAAAATAGCACAAA	41551	0	A_55_P2742970	Zfp961	BC065788	gb|Mus musculus cDNA sequence BC065788, mRNA (cDNA clone IMAGE:832040), partial cds. [BC065788]	1.3199	0.0258008	0.819544	0.711291	1.2176	2	0	0	0	1.14627	0.941742	1.1352	1.31588	1.34747	1.29634	1.02336	1.33481	0.000295	1.17859	1.27975	0.000295
2969	19014	DATA	46030	281	110	ref|NM_019496|gb|AK051736|gb|AK018092|tc|TC1586824	mm|chrX:139288150-139288091	0	NA	2975	CATTTTCTTGCCCTTATAGGGAAAGTGAGCACAAGCTGAATGATATTGTCTGCTAGGAAA	41668	0	A_52_P305995	Ammecr1	NM_019496	ref|Mus musculus Alport syndrome, mental retardation, midface hypoplasia and elliptocytosis chromosomal region gene 1 (Ammecr1), mRNA [NM_019496]	1.26467	0.209491	0.929704	0.166623	2.1675	3	0	0	0	0.949558	0.977616	1.16176	1.50229	1.10661	1.18513	1.06457	0.774413	0.488952	1.05068	0.998779	0.739652
2973	19030	DATA	46077	281	157	ref|NM_026975|ens|ENSMUST00000177442|ens|ENSMUST00000107099|ens|ENSMUST00000016087	mm|chr3:96000862-96000803	0	NA	377	AGTGGAGAGAAAACCCACAGTTGGACATTAGTCCCCCCTGCCTAGGTGGGAGCAAGAAAA	41752	0	A_55_P2751696	Bola1	NM_026975	ref|Mus musculus bolA-like 1 (E. coli) (Bola1), mRNA [NM_026975]	1.15707	0.0156713	0.941053	0.0311874	10.7196	2	0	0	0	0.914875	0.902125	0.995627	1.14068	1.15861	1.17191	1.15269	0.965691	0.774623	0.960517	0.957561	0.905082
2994	19207	DATA	46511	284	99	ref|NM_011291|ens|ENSMUST00000122189|ens|ENSMUST00000197353|ens|ENSMUST00000119853	mm|chr1:16091924-16091865	0	NA	752	TCAAATTATCTTCCCCATGAGGTGGGATGAAGAAGAAGACAACTCACTTTGTAGAAGGTG	41945	0	A_55_P2126470	Rpl7	NM_011291	ref|Mus musculus ribosomal protein L7 (Rpl7), mRNA [NM_011291]	1.21127	0.0661285	0.906606	0.143219	3.34512	2	0	0	0	1.33105	1.36336	0.600671	1.21032	1.27787	1.14562	0.978486	0.862394	0.510412	1.04572	0.914489	0.759609
2999	19252	DATA	46613	285	37	gb|BC016565|gb|BC098490|ens|ENSMUST00000200338|ens|ENSMUST00000122204	mm|chr4:118972694-118972635	0	NA	652	GGACCCGGAAGTATCACAAATGAGAACCTATAATCCTGTTTAAATTTTGGACTGTAAATA	42130	0	A_55_P2049313	Ppih	BC016565	gb|Mus musculus peptidyl prolyl isomerase H, mRNA (cDNA clone IMAGE:3157034), partial cds. [BC016565]	1.5293	0.287496	1.08264	0.116758	2.49322	2	0	0	0	0.782238	0.387317	0.710938	1.82563	1.51074	1.25154	1.55256	0.730869	0.000247	1.08654	1.1974	0.963979
3004	19278	DATA	46680	285	104	ref|NM_153150|ens|ENSMUST00000142022|ens|ENSMUST00000150925|ens|ENSMUST00000129270	mm|chr16:17927339-17927280	0	NA	488	GGTAGGCTCGACAGCAGGAGAGGACTATTGTGCGGTCTGGGTGCCGGCGTGGCAGAAGCA	42246	0	A_66_P108940	Slc25a1	NM_153150	ref|Mus musculus solute carrier family 25 (mitochondrial carrier, citrate transporter), member 1 (Slc25a1), mRNA [NM_153150]	1.20077	0.193552	0.805433	0.0250443	3.50849	2	0	0	0	1.38907	0.924056	1.03419	1.07795	1.10047	1.42388	1.15617	0.69846	0.779449	0.776924	0.823886	0.81549
3007	19291	DATA	46708	285	132	ens|ENSMUST00000025305|ens|ENSMUST00000113782|ref|XM_011246577|ref|XM_006524807	mm|chr17:36047385-36047326	0	NA	1017	GTCCCTGATTTAAACCTCCTGGCTCAGCTTTTATACAATAAAGCTGTGTCTCTTCACCCG	42299	0	A_66_P106814	Mrps18b	ENSMUST00000025305	ens|mitochondrial ribosomal protein S18B [Source:MGI Symbol;Acc:MGI:1914223] [ENSMUST00000025305]	1.10395	0.0714705	0.981004	0.0493476	2.45195	3	0	0	0	0.83519	0.908937	1.0695	1.18234	1.08713	1.0424	1.03772	0.932319	0.961458	1.02333	0.992875	0.926803
3011	19300	DATA	46729	285	153	ref|NM_011672|ref|NR_028403|ens|ENSMUST00000115578|ens|ENSMUST00000172013	mm|chr16:18834344-18834403	0	NA	985	AGATTCATTGCTTTCTCTGGAGAAGGACAGTCACTGCGTAAGAAGGGAAGAAAGCCCTAA	42333	0	A_55_P2047509	Ufd1l	NM_011672	ref|Mus musculus ubiquitin fusion degradation 1 like (Ufd1l), transcript variant 1, mRNA [NM_011672]	1.07862	0.0569157	0.965106	0.0432818	2.74976	3	0	0	0	0.970713	0.962334	0.996881	1.14266	1.0338	1.05942	1.1123	0.902378	0.924205	0.946305	1.01461	0.934405
3015	19318	DATA	46775	286	35	ref|NM_001159515|ref|NM_001159514|ref|NM_001159513|ref|NM_012015	mm|chr13:56205741-56205682	0	NA	636	CAAAAAGGCCAAGTCTCCATCCCAGAAGAAGCCAGTGGCTAAGAAGACAGGAGGCAAGAA	42127	0	A_55_P2058359	H2afy	NM_001159515	ref|Mus musculus H2A histone family, member Y (H2afy), transcript variant 4, mRNA [NM_001159515]	1.18101	0.203354	0.880303	0.0880208	2.35048	2	0	0	0	0.962507	1.13935	1.04338	1.06386	1.06334	1.41582	1.06941	1.07792	0.523496	0.948623	0.780974	0.91131
3032	19441	DATA	47067	287	163	ref|NM_010489|ens|ENSMUST00000010191|ens|ENSMUST00000195752|ref|XM_006511643	mm|chr9:107474949-107475008	0	NA	1688	TGTTCTAAGGGGGAGAGAAACATCCCCTGAGATGCCCTCATCTTGCCAGAGAAGATGGAG	42646	0	A_51_P284577	Hyal2	NM_010489	ref|Mus musculus hyaluronoglucosaminidase 2 (Hyal2), mRNA [NM_010489]	1.13478	0.0383477	0.844842	0.0373233	9.38438	3	0	0	0	1.11191	1.00722	0.991792	1.09345	1.16921	1.14166	1.13092	0.892007	0.927298	0.871235	0.861151	0.80214
3040	19491	DATA	47183	288	115	ens|ENSMUST00000148070|ref|XR_388547|ref|XR_388548|ref|XR_388549	mm|chr11:54640429-54640370	0	NA	1439	CACACACTGCCAAGGGAGGCACTAGTGTTGCCACAGTAATGGTAATAAAGTGCTTGACTG	42560	0	A_55_P2056986	Lyrm7	ENSMUST00000148070	ens|LYR motif containing 7 [Source:MGI Symbol;Acc:MGI:1922780] [ENSMUST00000148070]	1.36622	0.204183	0.856385	0.175955	3.27622	3	0	0	0	1.51724	0.910939	1.07981	1.20591	1.5961	1.29667	1.00505	0.818692	0.000446	1.03369	0.68181	0.853657
3043	19515	DATA	47265	289	33	ref|NM_010591|ens|ENSMUST00000107094|gb|BC094032|gb|BC021888	mm|chr4:94716987-94716928	0	NA	1926	ATGCTAACGCAGCAGTTGCAAACGTTTTGAGAACAGACTGTCAGGGCTGAGGGGCAATGG	42705	0	A_55_P2158990	Jun	NM_010591	ref|Mus musculus jun proto-oncogene (Jun), mRNA [NM_010591]	1.41243	0.0933566	1.00108	0.255808	2.61644	2	0	0	0	0.951327	1.00776	1.031	1.45189	1.47959	1.30583	0.711063	0.678784	0.379524	1.24196	1.02871	0.732583
3051	19580	DATA	47411	290	15	ref|NM_019941|ref|XM_011250655|ref|XM_011250654|ref|XM_011250656	mm|chr7:24928153-24928212	0	NA	3344	GCCCTGAATTCATTGAGGAAAGAGCTTTTTATTGTAATCACTACTGCAAATGTTTTTGCA	42676	0	A_55_P2038697	Zfp235	NM_019941	ref|Mus musculus zinc finger protein 235 (Zfp235), mRNA [NM_019941]	0.940725	0.0369197	1.1287	0.0701333	4.10785	3	0	0	0	1.08096	1.07875	0.854349	0.96204	0.96204	0.898093	1.21866	1.11882	0.440198	1.06956	1.20618	1.11035
3057	19632	DATA	47562	291	2	ref|NM_023403|ens|ENSMUST00000094215|gb|AK076760|gb|BC014742	mm|chr7:91047628-91047687	0	NA	2077	TGTCCCAGTGAAGCTACTGTTGGTCATTGGTTTTTCAAAAATAAAGTACAATTACCAGCT	42942	0	A_51_P222522	Mesdc2	NM_023403	ref|Mus musculus mesoderm development candidate 2 (Mesdc2), mRNA [NM_023403]	0.9559	0.0850024	1.05606	0.00390989	2.03871	2	0	0	0	1.12174	1.06427	0.946581	0.881286	0.93798	1.04843	1.03885	0.989981	0.802698	1.05997	1.05606	1.05215
3058	19637	DATA	47574	291	14	ref|NM_001030014|ens|ENSMUST00000061882|ref|XM_011245586|ref|XM_006520815	mm|chr15:83377287-83377228	0	NA	1832	CAGGAGTGGGGCAATGCTCCTGGGAAGACATATAATAAACATGAGCCATTCTAAGCTGCC	42962	0	A_55_P2038867	Mcat	NM_001030014	ref|Mus musculus malonyl CoA:ACP acyltransferase (mitochondrial) (Mcat), mRNA [NM_001030014]	1.14863	0.0220706	1.02158	0.0888234	2.40436	2	0	0	0	0.925046	1.00757	0.970339	1.12656	1.14863	1.1707	1.0592	0.980703	0.546507	1.08856	1.05536	0.920824
3059	19644	DATA	47589	291	29	ref|NM_001204875|ref|NM_023871|ens|ENSMUST00000125824|ens|ENSMUST00000184573	mm|chr2:29926444-29926503	0	NA	1162	CGAAGGCGAGGATGATTAGCACAGAAGACTGATGGATTCCAACCTTCTTTTTTATTTTCT	42991	0	A_55_P2061061	Set	NM_001204875	ref|Mus musculus SET nuclear oncogene (Set), transcript variant 2, mRNA [NM_001204875]	1.15547	0.0680721	0.92098	0.238895	1.63504	2	0	0	0	0.948933	1.08522	0.975726	1.14366	1.09408	1.22868	1.1445	1.03501	0.581259	1.06581	1.05189	0.645245
3060	19650	DATA	47604	291	44	ref|NM_001081267|ens|ENSMUST00000123731|ens|ENSMUST00000156060|ens|ENSMUST00000042399	mm|chr7:104813262-104818323	0	NA	2717	AACCATCCAGAACTAATTCTTCTGTGTGATTCTTGCGACAGTGGATACCATACTGCCTGC	43019	0	A_55_P2845290	Rsf1	NM_001081267	ref|Mus musculus remodeling and spacing factor 1 (Rsf1), mRNA [NM_001081267]	1.1975	0.116863	0.898531	0.13632	2.88398	3	0	0	0	0.961356	1.02431	0.98557	1.07343	1.21358	1.3055	0.934967	0.998814	0.806879	0.953944	0.998419	0.74323
3064	19679	DATA	47667	291	107	ref|NM_001306127|ref|NM_001306126|ref|NM_008507|ref|NM_001306128	mm|chr5:122267358-122267299	0	NA	2493	TTTACGACAGAAGCTCTGCCAGAGGGACAAGCTTAAAGATCAAAATTGATTTAAACATTT	43127	0	A_55_P1993864	Sh2b3	NM_001306127	ref|Mus musculus SH2B adaptor protein 3 (Sh2b3), transcript variant 3, mRNA [NM_001306127]	1.20203	0.0921597	1.01394	0.093792	2.47758	3	0	0	0	1.04171	0.822275	1.14178	1.305	1.12729	1.1738	0.929408	0.858322	0.558603	1.11594	0.994444	0.931425
3065	19680	DATA	47668	291	108	ref|NM_028915|ens|ENSMUST00000108370|ens|ENSMUST00000091325|gb|AK016559	mm|chr3:14558276-14558335	0	NA	2307	TGATTGAAGATGACAAGCAGAAGAGCATTCAAATAGAACTTCTCAAACATGAAAAAACCC	43129	0	A_52_P174840	Lrrcc1	NM_028915	ref|Mus musculus leucine rich repeat and coiled-coil domain containing 1 (Lrrcc1), transcript variant 3, mRNA [NM_028915]	1.49009	0.261115	1.04116	0.0777935	2.8539	2	0	0	0	1.05412	0.793067	0.473042	1.22396	1.50042	1.74588	0.784212	1.09644	0.205386	1.1061	0.954939	1.06244
3069	19694	DATA	47701	291	141	ref|NM_007570|ens|ENSMUST00000020692|gb|AK169436|gb|AK088976	mm|chr1:135973887-135973828	0	NA	637	CCGTATACCTCAACCTGGGGAACTGTATTTTTAAAATGAAGAGCTATTTATACATGTCTT	43188	0	A_55_P2909355	Btg2	NM_007570	ref|Mus musculus B cell translocation gene 2, anti-proliferative (Btg2), mRNA [NM_007570]	1.97386	0.321833	0.78315	0.173699	5.63926	3	0	0	0	0.593928	0.603031	0.932908	1.73997	1.84071	2.3409	0.559815	0.475482	0.563816	0.977325	0.72958	0.642546
3086	19817	DATA	47987	293	99	ref|NM_001081267|ens|ENSMUST00000150288|ens|ENSMUST00000135270|ens|ENSMUST00000123731	mm|chr7:104818376-104819364	0	NA	2829	GCCAACATAAACTACTGTGTGAAAAGTTAGAAGAACAGCTGCAAGATTTGGACGTCGCCT	43405	0	A_66_P104044	Rsf1	NM_001081267	ref|Mus musculus remodeling and spacing factor 1 (Rsf1), mRNA [NM_001081267]	1.18867	0.0249629	0.927693	0.154214	2.89355	2	0	0	0	1.31676	1.1564	0.597149	1.19182	1.21192	1.16229	0.957077	0.973082	0.650438	0.977052	1.05118	0.754843
3089	19823	DATA	48002	293	114	ref|NM_001162974|ref|NM_027053|ref|NM_001162973|ens|ENSMUST00000078448	mm|chr7:109061566-109061507	0	NA	875	CACCGAATGCCCTGAGGATAATCAGCTTGGTTTGACAATAAATGATTTGAGCTGTTGAAC	43431	0	A_55_P1999760	Lrrc51	NM_001162974	ref|Mus musculus leucine rich repeat containing 51 (Lrrc51), transcript variant 3, mRNA [NM_001162974]	1.30213	0.128518	1.09456	0.0495176	2.61033	2	0	0	0	0.787933	0.628537	1.04892	1.23459	1.22146	1.45033	1.0352	0.82282	0.48651	1.06381	1.15168	1.06819
3096	19858	DATA	48113	294	61	ens|ENSMUST00000085591|gb|AK020261|gb|AV374059|tc|TC1588916	mm|chr5:148087315-148087374	0	NA	2048	GGGTTGAAGGCAACCTGGCTGATTTCAAACCTTCCTAGAGGTCGATGTTTCCATTTCATT	43339	0	A_66_P132039	Pdx1	ENSMUST00000085591	ens|pancreatic and duodenal homeobox 1 [Source:MGI Symbol;Acc:MGI:102851] [ENSMUST00000085591]	1.30598	0.195941	0.862932	0.0400409	3.8371	2	0	0	0	1.33356	1.05604	0.775316	1.35873	1.47015	1.08907	0.752069	1.13556	0.440724	0.823012	0.903092	0.862691
3097	19860	DATA	48120	294	68	ref|NM_008102|ens|ENSMUST00000089959|gb|L09737|gb|BC069921	mm|chr14:47775407-47775348	0	NA	926	CGTACATTCCAGTTTCAGTTGGTACACTTGTGAACTTTATGTCTCATCATGAATTGTATT	43352	0	A_55_P2106175	Gch1	NM_008102	ref|Mus musculus GTP cyclohydrolase 1 (Gch1), mRNA [NM_008102]	1.18053	0.065893	0.95386	0.0377298	5.17064	3	0	0	0	1.06192	0.854903	0.891701	1.15356	1.25563	1.1324	1.02862	1.00785	0.751823	0.918774	0.99377	0.949037
3103	19898	DATA	48195	294	143	ref|NM_008296|ens|ENSMUST00000072838|ref|XM_006520471|ref|XM_006520472	mm|chr15:76331176-76331235	0	NA	1791	CCAGTGGAGCACAGATGGAACTTGGTCCTGGGCAGTACCTTGGATCAGGAGGAAGATCCT	43479	0	A_52_P647582	Hsf1	NM_008296	ref|Mus musculus heat shock factor 1 (Hsf1), mRNA [NM_008296]	1.13151	0.0425012	0.969994	0.0359943	5.02302	3	0	0	0	0.933662	0.975214	1.00699	1.16381	1.08336	1.14736	0.944743	0.927669	0.907204	0.983525	0.929196	0.997263
3105	19914	DATA	48232	295	16	ref|XM_006525706|ref|XM_006525708|gb|AK032535|gb|AK032392	mm|chr18:74440459-74440518	0	NA	4833	TGAGGATGAACATAACAAAACTACATTGCTGAAAATGTAGGCCGAAGACCATGGATGTCA	43546	0	A_65_P17972	Mbd1	XM_006525706	ref|PREDICTED: Mus musculus methyl-CpG binding domain protein 1 (Mbd1), transcript variant X3, mRNA [XM_006525706]	1.17072	0.095427	0.937893	0.0405776	3.88895	2	0	0	0	1.24416	1.04471	0.760064	1.20766	1.06235	1.24216	1.25273	1.03425	0.338243	0.954305	0.89168	0.967694
3108	19930	DATA	48279	295	63	gb|AK144352|riken|G630030A07	mm|chr8:125337861-125337920	0	NA	2138	TTGGTATCAACTTATAAACCCCAAATCATTTCAAGGCTTAGGACCCCCCAGCAAGTGCCT	43629	0	A_55_P2735605	Acsf3	AK144352	gb|Mus musculus 14 days embryo lung cDNA, RIKEN full-length enriched library, clone:G630030A07 product:hypothetical AMP-dependent synthetase and ligase containing protein, full insert sequence. [AK144352]	1.66221	0.143531	0.870127	0.755644	1.78368	2	0	0	0	0.733578	1.18425	1.21304	1.55109	1.61128	1.82426	0.000628	1.27086	0.000628	1.36794	0.000628	1.24182
3110	19947	DATA	48314	295	98	ref|NM_001033393|ens|ENSMUST00000100235|ens|ENSMUST00000061450|gb|AK155041	mm|chr11:115108278-115108337	0	NA	4504	GGAAACTAAAGGACTGAGCTTATCCCAGCACCAAAGTCCTTAATAAAGCTGCTATTACCC	43691	0	A_55_P2038117	Tmem104	NM_001033393	ref|Mus musculus transmembrane protein 104 (Tmem104), mRNA [NM_001033393]	1.34661	0.132765	0.972012	0.0152592	4.85501	2	0	0	0	1.06861	0.898254	0.688307	1.29976	1.24362	1.49645	0.954395	0.860698	0.573876	0.963494	0.989628	0.962913
3119	19993	DATA	48419	296	39	ref|NM_007797|ref|NM_001145801|ens|ENSMUST00000021884|ens|ENSMUST00000171347	mm|chr13:60997469-60997410	0	NA	389	CTCAATGTGTAGAGGAGAAATGGCTCCTGATTTGCCTGAATATGAAGATTTGGGAAAGAA	43585	0	A_51_P489522	Ctla2b	NM_007797	ref|Mus musculus cytotoxic T lymphocyte-associated protein 2 beta (Ctla2b), transcript variant 1, mRNA [NM_007797]	1.58337	0.173952	0.770169	0.109877	6.84579	3	0	0	0	0.65002	0.940194	0.92314	1.48249	1.78423	1.48339	0.955705	1.01775	0.452571	0.776596	0.876691	0.657218
3121	20023	DATA	48499	296	119	ref|NM_025686|ens|ENSMUST00000033877|ref|XM_006509180|ref|XM_006509181	mm|chr8:28234488-28234429	0	NA	1198	GGCGATGAGGATATTTCAGATAGTGAAATAGAGCAGTATTTGCGCACCCCTCAGGAAGTT	43731	0	A_51_P507974	Brf2	NM_025686	ref|Mus musculus BRF2, subunit of RNA polymerase III transcription initiation factor, BRF1-like (Brf2), mRNA [NM_025686]	1.1592	0.11829	1.00519	0.0284674	2.19246	2	0	0	0	1.00235	0.985413	1.10676	1.09902	1.0831	1.29548	0.9001	1.15459	0.357608	1.03288	0.976006	1.00669
3122	20038	DATA	48527	296	147	ref|NM_027840|ens|ENSMUST00000034087|ref|XM_006531371|ref|XM_006531373	mm|chr8:91150813-91150754	0	NA	1347	TACCGCACAGAATGTGTTCAAGGCCAGCCTAAAAAGTTTGCTGAGACTGGCTCCAAATAA	43786	0	A_51_P309158	Snx20	NM_027840	ref|Mus musculus sorting nexin 20 (Snx20), mRNA [NM_027840]	1.31686	0.108334	0.969006	0.0115178	5.53032	2	0	0	0	0.70576	0.88359	1.05888	1.44153	1.26343	1.24562	1.0713	0.649632	0.773249	0.969833	0.980087	0.957096
3124	20042	DATA	48533	296	153	ref|NM_019575|ens|ENSMUST00000178231|ens|ENSMUST00000079883|gb|AK154094	mm|chr10:80078469-80078528	0	NA	1742	CCACACGCCATAGTTGGTTTTGTTATGTGAGAATATTCTGGAAATAAATTCTCTTTCTGC	43797	0	A_55_P2172314	Scamp4	NM_019575	ref|Mus musculus secretory carrier membrane protein 4 (Scamp4), mRNA [NM_019575]	1.10624	0.0355633	0.984254	0.0666684	2.79617	3	0	0	0	0.889913	0.937771	1.00626	1.11435	1.13704	1.06732	1.14447	0.927044	0.823076	1.04215	0.999244	0.911366
3129	20054	DATA	48556	297	12	ref|NM_009765|ref|NM_001081001|ens|ENSMUST00000044620|ref|XM_006504906	mm|chr5:151372225-151372284	0	NA	10442	TGGTTGTCATCGACTGATTTAAAAAGCTTTAGGAGTAGACTGGATCACTACAACTATCAT	43837	0	A_51_P451106	Brca2	NM_009765	ref|Mus musculus breast cancer 2 (Brca2), transcript variant 2, mRNA [NM_009765]	1.1351	0.0311792	1.04204	0.0632665	2.28521	2	0	0	0	0.89866	1.10815	0.965158	1.12966	1.16863	1.10699	0.963709	1.04556	0.48736	1.07077	1.08584	0.969504
3141	20148	DATA	48807	298	99	ref|NM_207225|ens|ENSMUST00000189303|ens|ENSMUST00000008995|gb|AK029933	mm|chr1:93829613-93829554	0	NA	3657	ACTTGGGCAGAGTTGCTGAATCAAGTTGACATGAGGAAAATGAAAATCAAAGATCTAATA	43994	0	A_51_P417839	Hdac4	NM_207225	ref|Mus musculus histone deacetylase 4 (Hdac4), mRNA [NM_207225]	1.13442	0.0590671	1.31928	0.116725	2.44757	2	0	0	0	1.02326	0.921808	0.640771	1.16852	1.06621	1.16852	0.707712	0.922092	0.423262	1.30487	1.44254	1.21043
3142	20161	DATA	48833	298	125	ens|ENSMUST00000145107|gb|AK052767|tc|TC1622031|riken|D630046I19	mm|chr2:104974028-104974087	0	NA	2730	TTTAAAGGCATGTGCCACCATGCCCTGTCATGAGTTATTTCTTAGTGGTCTTTGCTGGGA	44037	0	A_55_P2719484	Wt1	ENSMUST00000145107	ens|Wilms tumor 1 homolog [Source:MGI Symbol;Acc:MGI:98968] [ENSMUST00000145107]	1.89524	0.59989	0.659541	0.0663556	3.54617	2	0	0	0	0.851757	0.613776	0.83072	2.3167	2.16058	1.20843	0.690876	0.490652	0.857884	0.698073	0.69763	0.582921
3154	20265	DATA	49077	300	41	ref|NM_028120|ens|ENSMUST00000141704|ens|ENSMUST00000079414|ref|XR_391102	mm|chr7:36223639-36223698	0	NA	2502	ACAAGAAGGCCCGTGGAAGCCACTGAGTGTCATAGGCAAGGGAGAAATAAACCAGCCCCG	44183	0	A_55_P2017764	Cep89	NM_028120	ref|Mus musculus centrosomal protein 89 (Cep89), mRNA [NM_028120]	1.25484	0.0242326	1.0749	0.0548244	5.19946	2	0	0	0	0.87	0.9116	1.05046	1.2788	1.23034	1.25538	0.827935	0.872208	0.478575	1.08741	1.12239	1.0149
3155	20274	DATA	49094	300	58	ref|NM_010423|ens|ENSMUST00000042412|ref|XM_006530053|gb|AK140212	mm|chr3:8663491-8663432	0	NA	2072	GATTTGGGCTCTAAAAGTATTGTTTTACAGGCTTACCCCTTTAGAAGGTATAATTTGAAC	44215	0	A_51_P258409	Hey1	NM_010423	ref|Mus musculus hairy/enhancer-of-split related with YRPW motif 1 (Hey1), mRNA [NM_010423]	1.56617	0.0969955	0.767798	0.0360531	13.3632	2	0	0	0	0.914757	0.779756	0.912485	1.63855	1.60399	1.45596	0.675485	0.704004	1.01161	0.744122	0.809291	0.749981
3159	20287	DATA	49125	300	89	ref|NM_026547|ref|XM_006503350|gb|AK013564|gb|BC147058	mm|chr4:115810002-115809943	0	NA	757	GCCATCAGAGGATGGCAATGCTAACCAGGGCTTTGAAGCTCATTGGTACTGGGGACAGTG	44275	0	A_52_P547491	Lurap1	NM_026547	ref|Mus musculus leucine rich adaptor protein 1 (Lurap1), mRNA [NM_026547]	1.64646	0.150555	1.10473	0.235949	3.35242	3	0	0	0	1.00242	0.483643	0.513346	1.81353	1.60455	1.5213	0.870622	0.876158	0.000256	1.0598	0.894469	1.35991
3171	20356	DATA	49294	301	94	ref|NM_001081409|ens|ENSMUST00000048188|gb|AK053606|gb|AK046670	mm|chr15:66474977-66475036	0	NA	4829	AGGCACTTAGAACTGATAGACAGTGAACTTGAATTTATCTTTGATAAGAATACATGCCAC	44574	0	A_51_P488175	Phf20l1	NM_001081409	ref|Mus musculus PHD finger protein 20-like 1 (Phf20l1), mRNA [NM_001081409]	1.29916	0.164358	0.940797	0.118774	3.06094	3	0	0	0	1.20892	0.97202	0.446814	1.17918	1.2318	1.4865	0.892306	1.10013	0.659926	0.960836	1.04828	0.813279
3172	20358	DATA	49298	301	98	ref|NM_134257|ens|ENSMUST00000084521|ens|ENSMUST00000144489|ens|ENSMUST00000125369	mm|chr4:62363993-62364052	0	NA	3676	GCCCTCTGGCCACACAGAAATGAGTGCTGAGGCAAATAAAAGGCCTGTGATATTCTCAGC	44582	0	A_55_P2027102	Rgs3	NM_134257	ref|Mus musculus regulator of G-protein signaling 3 (Rgs3), transcript variant 2, mRNA [NM_134257]	1.09912	0.0520193	0.99035	0.0210737	3.35677	2	0	0	0	1.26954	0.985269	0.984977	1.15888	1.0745	1.06399	1.06983	0.883484	0.538476	0.980656	0.975868	1.01453
3175	20362	DATA	49306	301	106	ref|NM_183180|ens|ENSMUST00000111265|ref|XM_006499474|ref|XM_006499475	mm|chr2:93043472-93043413	0	NA	2195	TTGTTAGTCTCTCTAGGCTCAGATTACCCAGACTAATAGGTTCACAACCAACCAACCAAC	44597	0	A_55_P2001583	Tspan18	NM_183180	ref|Mus musculus tetraspanin 18 (Tspan18), mRNA [NM_183180]	1.26658	0.134973	0.763898	0.182979	3.82921	3	0	0	0	1.55626	1.1143	0.625754	1.17537	1.20273	1.42163	1.11529	0.728857	0.768115	0.937838	0.780804	0.573052
3178	20376	DATA	49349	301	149	ref|NM_178051|ens|ENSMUST00000027492|ref|XM_011248070|gb|AK007901	mm|chr1:95197925-95197866	0	NA	1177	AAACCAACCTGTAATGATCCACTGGAGATACAGGTAGATAAACCAAACCAAATGAGGGGT	44671	0	A_52_P69756	Mterf4	NM_178051	ref|Mus musculus mitochondrial transcription termination factor 4 (Mterf4), mRNA [NM_178051]	1.13603	0.0234568	0.941657	0.0612076	5.13624	2	0	0	0	0.915458	0.926169	1.07307	1.12398	1.16307	1.12106	1.07752	0.872892	0.901826	0.963728	0.988767	0.872474
3180	20401	DATA	49401	302	37	ref|NM_030046|ens|ENSMUST00000136591|gb|AK082801|gb|AK140224	mm|chr15:10391145-10391086	0	NA	629	TTTGCACACAAAAGAATTTTTCCTGGAAGGAAGAGTATGATACCCGGCAAGCCTCGAACC	44475	0	A_55_P2733012	Dnajc21	NM_030046	ref|Mus musculus DnaJ (Hsp40) homolog, subfamily C, member 21 (Dnajc21), mRNA [NM_030046]	1.16563	0.0756383	1.02006	0.11129	1.87378	3	0	0	0	0.826019	1.11627	0.897714	1.14351	1.10352	1.24987	1.16612	0.986042	0.45074	1.09309	1.07512	0.891976
3182	20406	DATA	49417	302	53	ref|NM_010200|ref|NM_001290414|ref|NM_001290415|ens|ENSMUST00000124402	mm|chrX:56385123-56385064	0	NA	564	TCAGCTTAAGGGTATAGTTACCAAACTATACAGCCGACAAGGCTACCACTTGCAACTGCA	44503	0	A_52_P267243	Fgf13	NM_010200	ref|Mus musculus fibroblast growth factor 13 (Fgf13), transcript variant 1, mRNA [NM_010200]	1.27755	0.0845313	0.773255	0.0509378	8.85037	3	0	0	0	1.82312	1.14793	0.551481	1.19218	1.27926	1.36122	0.918937	1.40583	0.000285	0.808189	0.714808	0.796769
3184	20424	DATA	49466	302	102	ref|NM_026735|ens|ENSMUST00000125171|ens|ENSMUST00000006424|gb|AK003346	mm|chr5:89174126-89178559	0	NA	462	ACAGACTTCTGTACAGAGGAGAGCTGTCCGGTGATGTCAGCTGGACCAAAATATGAATAT	44590	0	A_52_P643865	Mob1b	NM_026735	ref|Mus musculus MOB kinase activator 1B (Mob1b), mRNA [NM_026735]	1.17418	0.190015	0.876197	0.0658831	2.56634	2	0	0	0	0.993621	1.04966	1.1781	1.19145	0.976119	1.35497	1.24091	0.873194	0.513388	0.951561	0.847506	0.829524
3188	20465	DATA	49565	303	37	ref|NM_146003|ens|ENSMUST00000164859|ens|ENSMUST00000175999|ens|ENSMUST00000037484	mm|chr9:79959127-79959186	0	NA	1153	TGAAGAAAACTGAAGAGTCAGAATCATATGTAGAGTCTGAGATTAAGAGGAAAGTCCAGC	44766	0	A_52_P365721	Senp6	NM_146003	ref|Mus musculus SUMO/sentrin specific peptidase 6 (Senp6), mRNA [NM_146003]	1.2963	0.0791793	0.826999	0.292491	2.68254	2	0	0	0	0.784973	1.31317	0.952832	1.27204	1.2321	1.38478	1.20014	0.910697	0.468279	1.1522	0.743341	0.585452
3189	20472	DATA	49580	303	52	ref|NM_133649|ref|NM_133648|ens|ENSMUST00000028549|ens|ENSMUST00000053666	mm|chr2:112202989-112203048	0	NA	6285	ATTCCTTATTGTGGATATTAAGTTACACTGTAAGCATATTTACATGCTCTTTTTCCCCCC	44792	0	A_51_P280437	Slc12a6	NM_133649	ref|Mus musculus solute carrier family 12, member 6 (Slc12a6), transcript variant 2, mRNA [NM_133649]	1.14505	0.152686	0.896126	0.0967539	2.38524	3	0	0	0	1.01625	1.06169	0.93896	1.18789	0.975526	1.27175	0.925348	1.14382	0.790387	0.959262	0.944381	0.784735
3193	20489	DATA	49615	303	87	ref|NM_152809|ens|ENSMUST00000069597|ref|XM_006526230|ref|XM_006526231	mm|chr18:54114992-54115051	0	NA	4047	TTTAAGTGCTCCGTTTTCGTGCTGGAGAAGAAGTCTTTGGCACACAGACTGGTCAGTAAT	44856	0	A_51_P221949	Csnk1g3	NM_152809	ref|Mus musculus casein kinase 1, gamma 3 (Csnk1g3), mRNA [NM_152809]	1.10576	0.0448404	0.943224	0.0706491	3.36429	3	0	0	0	1.27558	1.18057	0.737	1.08194	1.15748	1.07785	0.849149	1.02649	0.784269	0.910321	0.895028	1.02432
3211	20583	DATA	49848	304	156	ref|NM_020569|ens|ENSMUST00000105673|ens|ENSMUST00000105674|ens|ENSMUST00000030805	mm|chr4:150271465-150271406	0	NA	679	AGACATGGCCAACCAAGTGAAGGCACCGCTTGTTCTCAAAGACTAGAGCCCAAGCCCTGG	44979	0	A_55_P2141429	Park7	NM_020569	ref|Mus musculus Parkinson disease (autosomal recessive, early onset) 7 (Park7), mRNA [NM_020569]	1.10742	0.0223137	1.04441	0.0280145	3.04714	3	0	0	0	1.05321	0.834122	1.02063	1.0817	1.11888	1.12168	1.02063	0.89308	0.722842	1.01371	1.05093	1.06859
3227	20666	DATA	50023	306	3	ref|NM_019937|ens|ENSMUST00000149729|ens|ENSMUST00000142153|ens|ENSMUST00000135719	mm|chr3:65751624-65750823	0	NA	1335	CCCAAGAAGACATTATAATAATAGGCGAAGTCGATCTGGAACATACAGCTCAAGATCAAG	45000	0	A_51_P351481	Ccnl1	NM_019937	ref|Mus musculus cyclin L1 (Ccnl1), mRNA [NM_019937]	1.34387	0.178299	1.02479	0.0340514	3.04469	2	0	0	0	1.0546	1.13424	0.339988	1.45027	1.44332	1.13803	0.631749	0.901324	0.832113	1.04986	1.03848	0.986021
3233	20719	DATA	50154	306	134	ref|NM_180678|ens|ENSMUST00000003572|gb|AK146238|gb|AK165857	mm|chr6:55029377-55029436	0	NA	2268	AACTCATCATGTCCACTACACAGAGCATTGTGACTGCATCCAGGGACGGTTTTTCCTCAG	45237	0	A_66_P121369	Gars	NM_180678	ref|Mus musculus glycyl-tRNA synthetase (Gars), mRNA [NM_180678]	1.07761	0.007785	0.987058	0.045489	3.39836	2	0	0	0	0.84144	0.968242	1.06754	1.06955	1.07819	1.08508	0.98096	0.92232	1.0255	1.03296	0.986222	0.941992
3234	20727	DATA	50170	306	150	ens|ENSMUST00000116179|nap|NAP111581-1	mm|chr4:16318272-16318214	0	NA	539	TGATGATAATGATGGCTTTTCAATGAAGCACACAGCCACTGCCCGTTTCCAGAGAAACCA	45263	0	A_55_P2095926	ENSMUST00000116179	ENSMUST00000116179	ens|predicted gene 11864 [Source:MGI Symbol;Acc:MGI:3650454] [ENSMUST00000116179]	1.08659	0.0422676	0.866799	0.0301953	7.32873	3	0	0	0	0.991354	1.00625	1.1193	1.06026	1.06417	1.13535	1.1414	1.0186	0.862923	0.882603	0.885812	0.831981
3253	20865	DATA	50493	308	145	ref|NM_177041|ens|ENSMUST00000107426|gb|BC025817|gb|AK180210	mm|chr3:89207151-89207092	0	NA	1631	CCCTGTCTACCGTCCAGCATACCTACTGGAGAATGAGGATGAGGAGAGAAATTCCAGAAT	45552	0	A_55_P2056140	Flad1	NM_177041	ref|Mus musculus RFad1, flavin adenine dinucleotide synthetase, homolog (yeast) (Flad1), mRNA [NM_177041]	1.19489	0.113434	1.02647	0.050801	2.34705	2	0	0	0	0.760403	0.798746	1.04457	1.32336	1.15279	1.10853	1.06535	0.894423	0.772408	1.07772	1.02558	0.976125
3257	20887	DATA	50535	309	23	gb|AK035387|tc|TC1613101|tc|TC1680674|riken|9530028C05	mm|chr6:3283545-3283486	0	NA	2641	TAGGGTGCATGAGATTTGTGGGTGTAGCTACCAGTCCTAGTTTAGACACGTCACCAAAAA	45629	0	A_51_P249471	Gm20559	AK035387	gb|Mus musculus adult male urinary bladder cDNA, RIKEN full-length enriched library, clone:9530028C05 product:similar to HISTOCOMPATIBILITY 2, CLASS II ANTIGEN E BETA [Mus musculus], full insert sequence. [AK035387]	1.01828	0.0371621	1.12724	0.0644171	2.53756	3	0	0	0	0.873988	0.990917	0.915607	0.980866	1.0188	1.05518	1.03112	1.04485	0.706948	1.0634	1.12611	1.19221
3259	20902	DATA	50566	309	54	ref|NM_026871|ens|ENSMUST00000151514|ens|ENSMUST00000030192|ens|ENSMUST00000134082	mm|chr4:43667206-43667147	0	NA	483	TGGCCACCTGGCTAAACCTGCCAGCTGGCCAAGGACCACAGGCCTGGATGCTTGGACGGA	45689	0	A_66_P133405	Hint2	NM_026871	ref|Mus musculus histidine triad nucleotide binding protein 2 (Hint2), mRNA [NM_026871]	1.24406	0.0285293	0.899038	0.122937	4.73517	2	0	0	0	1.11533	1.01449	0.965197	1.24507	1.21504	1.27207	0.999756	0.803355	0.672579	0.934793	0.762186	1.00013
3266	20956	DATA	50696	310	20	ref|NM_001163780|ref|NM_019987|ens|ENSMUST00000044551|ref|XM_006511304	mm|chr9:78019631-78019690	0	NA	6425	TCGTATCATCCTAAGGGGTGTTGGTTTTTCCTTAAACACTGATATGTGACTTGAACACCA	45625	0	A_52_P562054	Ick	NM_001163780	ref|Mus musculus intestinal cell kinase (Ick), transcript variant 1, mRNA [NM_001163780]	0.928589	0.0581268	1.09179	0.0307329	4.29922	3	0	0	0	1.26091	1.19664	0.57424	0.862367	0.971171	0.952231	0.919993	1.15936	0.827711	1.06265	1.1239	1.08884
3298	21152	DATA	51197	313	29	ref|NM_001256059|ens|ENSMUST00000059428|ref|XM_006503619|gb|AK049058	mm|chr5:52766150-52766091	0	NA	3056	TTTCAGGTAAAGGGGGTTTATAGTAAACTCTAGCACAGTCTAGTAGGGCAAGAAACTGCA	46225	0	A_52_P188589	Ccdc149	NM_001256059	ref|Mus musculus coiled-coil domain containing 149 (Ccdc149), mRNA [NM_001256059]	0.920702	0.0380536	1.24319	0.0846336	6.01942	2	0	0	0	1.01742	0.8692	0.922905	0.93949	0.876909	0.945709	0.878269	1.17452	0.645988	1.32547	1.15638	1.24773
3299	21155	DATA	51201	313	33	ens|ENSMUST00000145113|gb|AK164881|gb|AK047916|gb|BB364429	mm|chr11:98086486-98086545	0	NA	3297	GGCATATACCACCACACACTAGTCCCATGTTTCTTTAATTTAGAAATACCTAAAACATTC	46233	0	A_55_P2738202	Cdk12	ENSMUST00000145113	ens|cyclin-dependent kinase 12 [Source:MGI Symbol;Acc:MGI:1098802] [ENSMUST00000145113]	1.29933	0.0502347	0.880517	0.118297	5.64425	2	0	0	0	0.954853	1.05252	0.915564	1.25139	1.35158	1.29502	0.881527	0.914251	0.741743	0.749419	0.912837	0.979295
3302	21165	DATA	51228	313	60	ref|NM_009112|ens|ENSMUST00000045756|ref|XM_011251865|gb|AK161647	mm|chr3:93368437-93368496	0	NA	519	CAAATGAGATCCAACTCCAATTCAACAATCTGAGAGAGAAAACTTAATCCAATGGCAGAG	46283	0	A_51_P342871	S100a10	NM_009112	ref|Mus musculus S100 calcium binding protein A10 (calpactin) (S100a10), mRNA [NM_009112]	1.21928	0.140763	0.916252	0.0435589	3.56203	2	0	0	0	0.801893	0.834699	1.11346	1.32755	1.06016	1.27013	1.07901	1.04879	0.715549	0.943777	0.938948	0.866032
3305	21176	DATA	51256	313	88	ref|NM_001081341|ens|ENSMUST00000037408|ref|XM_011242748|ref|XM_006511166	mm|chr9:55401291-55398633	0	NA	4256	TTCAAGTCTCAAAGGAAAATTCCAGAACCCCGGGAACTACCTGGAACTGGCTAACAGATT	46334	0	A_52_P589509	Scaper	NM_001081341	ref|Mus musculus S phase cyclin A-associated protein in the ER (Scaper), mRNA [NM_001081341]	1.12099	0.0776856	0.989176	0.0778593	2.07582	3	0	0	0	0.993215	0.903073	1.02736	1.06592	1.08721	1.20985	1.04646	0.952917	0.746472	1.03186	0.899309	1.03636
3307	21201	DATA	51322	313	154	ref|NM_177389|ens|ENSMUST00000195233|ens|ENSMUST00000109158|gb|AK046506	mm|chr1_random:311443-309851	0	NA	3989	GTCTGAGAGGGAGCAGAACGTCAAGAACCAGGACCTGATACTGGAAAACAAGAAATCTAT	46449	0	A_66_P139460	Mia3	NM_177389	ref|Mus musculus melanoma inhibitory activity 3 (Mia3), mRNA [NM_177389]	1.16373	0.0705445	0.988285	0.0774657	2.90038	3	0	0	0	0.893417	0.962527	1.0749	1.10831	1.13975	1.24314	0.981513	0.799274	0.832318	1.01308	1.05032	0.901459
3320	21316	DATA	51588	315	92	ref|NM_025819|ens|ENSMUST00000138095|ens|ENSMUST00000111883|ens|ENSMUST00000064771	mm|chr1:153258587-153258528	0	NA	466	TTGAATGTAGAAGTTTTCATTCCTAAAAAGAGACTAAAATTCAGTTCTTCGACCCAAGCG	46628	0	A_52_P166499	Swt1	NM_025819	ref|Mus musculus SWT1 RNA endoribonuclease homolog (S. cerevisiae) (Swt1), mRNA [NM_025819]	1.16497	0.0839456	0.976666	0.0204528	3.77478	2	0	0	0	1.39104	1.11226	0.662379	1.18622	1.23624	1.07244	0.790104	0.997053	0.622269	0.974769	0.957227	0.998001
3329	21376	DATA	51749	316	89	ref|NM_001081382|ens|ENSMUST00000114583|ref|XM_006506673|ref|XM_006506674	mm|chr6:47974381-47974322	0	NA	2916	CTTCAGGCTGTTAATTTCCTTGACAATAAAATGGATGAAAACAATCTGCACGGGGGCAGT	46623	0	A_51_P446731	Zfp777	NM_001081382	ref|Mus musculus zinc finger protein 777 (Zfp777), mRNA [NM_001081382]	0.977581	0.0705817	1.16173	0.0183193	4.37391	2	0	0	0	1.12489	0.912589	0.779586	0.957877	1.05592	0.918945	1.06569	1.17637	0.522955	1.15269	1.18281	1.14967
3331	21379	DATA	51757	316	97	ref|NM_145441|ens|ENSMUST00000142867|ens|ENSMUST00000020962|gb|BC004632	mm|chr12:4886371-4886312	0	NA	1977	AGAGACATAGCAAAACCCTGTCTCTTGATAGTAACAACCTTCCCACCCGGAGACATAGAT	46637	0	A_55_P2822926	Ubxn2a	NM_145441	ref|Mus musculus UBX domain protein 2A (Ubxn2a), mRNA [NM_145441]	1.08343	0.0270031	0.88571	0.038803	7.24407	3	0	0	0	1.12685	1.12052	0.989115	1.07241	1.1142	1.06367	1.02802	0.969744	0.85834	0.89898	0.916137	0.842013
3334	21391	DATA	51801	316	141	ref|NM_029379|ens|ENSMUST00000046333|ref|XM_006510665|gb|AK006538	mm|chr9:39958357-39958416	0	NA	884	CTGGGCTCTGTGACTTGACAATACGTACCTTTCAGTACTACCTGACGTTGCTATGGAATT	46718	0	A_51_P102518	Tmem225	NM_029379	ref|Mus musculus transmembrane protein 225 (Tmem225), mRNA [NM_029379]	1.93343	1.36694	0.677328	0.0679376	1.58964	2	0	0	0	0.714083	1.14398	0.839441	0.879149	3.47787	1.44326	0.000394	0.615306	0.854536	0.67175	0.612352	0.747883
3339	21446	DATA	51943	317	119	ref|NM_029981|ens|ENSMUST00000169787|ens|ENSMUST00000091233|ens|ENSMUST00000139633	mm|chr2:26964005-26964064	0	NA	3113	CTTCCTTGGACACCCACTCTGCAGGGGATGCTGAACTGTGAAGATGTGACACAGGGCACA	46966	0	A_51_P367780	Adamtsl2	NM_029981	ref|Mus musculus ADAMTS-like 2 (Adamtsl2), mRNA [NM_029981]	1.49773	0.240885	0.674726	0.0416408	5.83124	2	0	0	0	0.717593	0.735841	1.29104	1.71979	1.24164	1.53177	1.26738	0.941675	0.529086	0.722447	0.655965	0.645766
3347	21492	DATA	52052	318	64	ref|NM_144538|ref|XM_006527418|ref|XM_006527413|ref|XM_006527414	mm|chr19:10109886-10109945	0	NA	2129	CTATTTCCTTCCAATGGAATGTAACGCGATCTCTATTTAATAAAGGAAGGCTTTGTTGGT	46872	0	A_55_P1994927	Rab3il1	NM_144538	ref|Mus musculus RAB3A interacting protein (rabin3)-like 1 (Rab3il1), mRNA [NM_144538]	1.08232	0.0478392	1.18011	0.0529836	2.37273	3	0	0	0	0.97507	0.863631	0.993224	1.03765	1.07653	1.1328	0.948546	0.993804	0.438414	1.14207	1.15765	1.24063
3348	21497	DATA	52070	318	82	ref|NM_175833|ref|NM_001134426|ref|NM_001134427|ref|NM_175565	mm|chr9:103258730-103258671	0	NA	986	ACAGGCCTCCTGGGGCAAGGCTAACCACAACAAGGAAAACGCCACAAGGACCACCAGAAA	46904	0	A_55_P2040121	Cdv3	NM_175833	ref|Mus musculus carnitine deficiency-associated gene expressed in ventricle 3 (Cdv3), transcript variant 2, mRNA [NM_175833]	1.18722	0.0794296	0.969752	0.0209709	4.58499	2	0	0	0	0.886997	0.856762	1.04435	1.10978	1.2685	1.18338	1.04107	0.902141	0.79777	0.977596	0.94599	0.98567
3378	21674	DATA	52476	320	160	ref|NM_001164075|ref|NM_001164077|ref|NM_009372|ref|NM_001164076	mm|chr17:71193688-71193629	0	NA	1576	ATGGGACGCCCACCTACAGTCTAATGAGTAAACTTTCAGTTTTTTGTTTGTTTGTTTTTT	47341	0	A_55_P2092526	Tgif1	NM_001164075	ref|Mus musculus TGFB-induced factor homeobox 1 (Tgif1), transcript variant 1, mRNA [NM_001164075]	1.3043	0.233445	0.892676	0.0899882	2.84969	2	0	0	0	0.996019	0.989287	0.952856	1.29657	1.07482	1.54152	0.836549	0.806341	0.828008	0.947822	0.788833	0.941373
3380	21682	DATA	52504	321	24	ref|NM_011403|ens|ENSMUST00000006749|gb|AK172395|gb|AK157833	mm|chr11:102210315-102210256	0	NA	4368	CCCACAAGGTCTAAGAAAAGCGTTTGCCATGTTTTGGGCACACCCCATCCTCTCCTGCCT	47391	0	A_51_P196972	Slc4a1	NM_011403	ref|Mus musculus solute carrier family 4 (anion exchanger), member 1 (Slc4a1), mRNA [NM_011403]	2.18575	0.643505	0.659056	0.209463	3.90746	2	0	0	0	0.753893	0.538943	0.422336	2.75056	1.48521	2.32149	0.636755	0.494499	0.619143	0.492076	0.894081	0.591011
3404	21842	DATA	52909	323	101	ref|NM_172740|ens|ENSMUST00000145952|ref|XM_011250538|ref|XM_011250536	mm|chr7:30661170-30661229	0	NA	2182	GAGTTCTTACAAATGTGAATATGGGACTGTGAATTCAGCATTTGAGAATTTATGTAGGAG	47810	0	A_51_P422335	Zfp420	NM_172740	ref|Mus musculus zinc finger protein 420 (Zfp420), mRNA [NM_172740]	1.22316	0.154108	0.799627	0.122445	3.72696	3	0	0	0	1.07069	0.932505	1.00646	1.39949	1.11429	1.15569	1.25365	0.924108	0.744236	0.891257	0.847062	0.660561
3423	22003	DATA	53298	325	162	ref|NM_026921|ens|ENSMUST00000057115|ens|ENSMUST00000104942|gb|AK007415	mm|chr13:59858305-59858246	0	NA	385	TATGTGGAAGACAAACTGTCCAGTGAGTTTGTGTTCAATAACCCCAACATCAAGGGAACC	48227	0	A_52_P304323	Isca1	NM_026921	ref|Mus musculus iron-sulfur cluster assembly 1 homolog (S. cerevisiae) (Isca1), mRNA [NM_026921]	1.08598	0.139537	0.932621	0.0761282	1.67107	3	0	0	0	1.10281	0.930602	1.07032	1.00922	1.00167	1.24704	1.03872	0.97101	0.830738	0.97101	0.844941	0.981911
3437	22099	DATA	53509	327	45	ref|NM_028659|ref|NM_001285942|ref|NM_001285943|ens|ENSMUST00000066070	mm|chr7:29757614-29757555	0	NA	717	TTCATCTGCAGCCAGGAAGAGAGCATTAAGCCCAAGAACATCGTGGAGAAGATTGACTTT	48314	0	A_55_P2016388	Eif3k	NM_028659	ref|Mus musculus eukaryotic translation initiation factor 3, subunit K (Eif3k), transcript variant 1, mRNA [NM_028659]	1.14666	0.0544701	0.992872	0.0208525	4.56701	2	0	0	0	0.725685	1.00434	1.05215	1.0956	1.14038	1.204	1.0388	0.987539	0.772877	1.01637	0.976558	0.985693
3442	22122	DATA	53551	327	87	ref|NM_011777|ref|NM_001289619|ref|NM_001289618|ens|ENSMUST00000070635	mm|chr6:42308330-42308389	0	NA	2373	ACCCACCTTGCTCTGTGCTGCTAGGTTGTGGCCACAGCTAAGATTATAAAACCTCATTTT	48390	0	A_51_P473252	Zyx	NM_011777	ref|Mus musculus zyxin (Zyx), transcript variant 1, mRNA [NM_011777]	1.18968	0.0851666	0.91241	0.0670653	4.43021	3	0	0	0	1.12463	0.883296	0.939378	1.28782	1.13521	1.14601	0.882606	0.87732	0.986497	0.863185	0.88525	0.988795
3458	22205	DATA	53746	328	118	ref|NM_021329|ref|NM_001285443|ref|NM_001285442|ref|NM_001285441	mm|chr11:68786182-68786123	0	NA	635	TTTGAACAGCTGGTAACTAGTTTGATTCTTCATGATCCCAACCTCTTTGGTCCCCAGTAA	48445	0	A_55_P1964093	Rangrf	NM_021329	ref|Mus musculus RAN guanine nucleotide release factor (Rangrf), transcript variant 2, mRNA [NM_021329]	1.14345	0.0634637	0.994598	0.0549161	3.07202	3	0	0	0	0.789942	0.800454	1.10374	1.2073	1.08038	1.14267	1.05605	0.949955	0.885717	1.04106	1.00874	0.933993
3503	22492	DATA	54431	332	147	ens|ENSMUST00000121346|nap|NAP022330-001	mm|chr13:33212590-33212531	0	NA	601	AGAAGAAGGCAGCCATCATCTCTGCTGAGGGTGACTCCAACGCCGCTGAACTGTTGATCG	49082	0	A_66_P124330	ENSMUST00000121346	ENSMUST00000121346	ens|predicted gene 11383 [Source:MGI Symbol;Acc:MGI:3649586] [ENSMUST00000121346]	1.16488	0.101921	0.962789	0.0759848	2.75342	3	0	0	0	0.902029	1.00728	1.00556	1.27775	1.13731	1.07959	0.959685	0.929624	0.812805	1.05042	0.922845	0.915107
3504	22498	DATA	54447	332	163	ref|NM_011030|ens|ENSMUST00000105466|ens|ENSMUST00000009789|ref|XM_006513340	mm|chr10:58834272-58834331	0	NA	2262	TGGTAACTAACTAGGGCCCAGTCAGGTCTGCTATTCCACGTGCAGAGTTCCTATTATTTA	49113	0	A_51_P458067	P4ha1	NM_011030	ref|Mus musculus procollagen-proline, 2-oxoglutarate 4-dioxygenase (proline 4-hydroxylase), alpha 1 polypeptide (P4ha1), mRNA [NM_011030]	1.26177	0.216626	0.915133	0.0578712	2.67769	2	0	0	0	1.0717	0.723053	1.01393	1.1782	1.09939	1.50774	1.05559	0.791916	0.813091	0.889769	0.874275	0.981356
3523	22615	DATA	54708	334	96	gb|AK049265|gb|BI221137|tc|TC1580972|riken|C330018A15	mm|chr10:116506664-116506605	0	NA	2497	TCCGGGCGTAAATACCCATGATGGGTACAAGGTGATACTGAAGCTGAGCTGACACACACT	49297	0	A_66_P114243	Frs2	AK049265	gb|Mus musculus ES cells cDNA, RIKEN full-length enriched library, clone:C330018A15 product:fibroblast growth factor receptor substrate 2, full insert sequence. [AK049265]	1.15671	0.0755514	0.986709	0.0197449	3.77073	2	0	0	0	1.212	0.997612	0.6119	1.07014	1.19066	1.20933	0.88171	1.11814	0.748387	0.982324	1.00828	0.969525
3525	22625	DATA	54729	334	117	ref|NM_013613|ref|NM_001139509|ens|ENSMUST00000112627|ens|ENSMUST00000028166	mm|chr2:56960059-56960000	0	NA	2749	CTAAATGTTGCGTGGGTGGCATGAATTGAAGGCAGAGGCTTGTAAATTTATCCAATGCAG	49337	0	A_66_P118213	Nr4a2	NM_013613	ref|Mus musculus nuclear receptor subfamily 4, group A, member 2 (Nr4a2), transcript variant 1, mRNA [NM_013613]	2.11361	0.973635	0.625081	0.0172358	2.6476	2	0	0	0	0.600858	0.540292	0.772189	1.85068	3.19171	1.29844	0.616995	0.660607	0.592994	0.636452	0.633541	0.60525
3528	22639	DATA	54767	334	155	ref|NM_010163|ens|ENSMUST00000111248|ens|ENSMUST00000145838|ens|ENSMUST00000157046	mm|chr2:93653784-93653725	0	NA	519	AAATCAAGGTGTACATCTACCCCCTAAAAAAGTATGTGGATGATGCCGGTGTTCCGGTGA	49403	0	A_55_P2125185	Ext2	NM_010163	ref|Mus musculus exostoses (multiple) 2 (Ext2), mRNA [NM_010163]	1.87068	0.331836	0.900702	0.201997	4.32465	3	0	0	0	1.10508	0.705793	0.556154	1.48836	2.08393	2.03975	0.000689	0.803678	0.51447	1.04139	0.991472	0.669244
3536	22673	DATA	54861	335	85	ref|NM_026964|ens|ENSMUST00000007865|ref|XM_006509655|gb|AK088037	mm|chr8:73392276-73392217	0	NA	760	GGATTCATAGAGTTCCGGGCCTGGGATTCTCCCACGTGCGCCATAGGTCATCCTCAACAA	49559	0	A_51_P370825	Ccdc124	NM_026964	ref|Mus musculus coiled-coil domain containing 124 (Ccdc124), mRNA [NM_026964]	1.05986	0.025731	0.947539	0.0624244	2.88129	2	0	0	0	1.04015	1.02374	1.02766	1.08957	1.045	1.045	1.12258	0.981974	0.781701	0.999503	0.878294	0.964819
3545	22719	DATA	54976	336	36	ref|NM_001305392|ref|NM_198959|ref|NM_001163027|ens|ENSMUST00000030562	mm|chr4:129807520-129807461	0	NA	2143	ATTCGTTCAGCATGGAGGCCAGCAGCCCGGAGCAGCTGTAATTAAAAGCCTGGCACTGAA	49484	0	A_55_P2155946	Hcrtr1	NM_001305392	ref|Mus musculus hypocretin (orexin) receptor 1 (Hcrtr1), transcript variant 3, mRNA [NM_001305392]	1.49623	0.439158	0.810468	0.128492	2.59582	2	0	0	0	0.669935	1.19192	0.955045	1.18065	1.31026	1.99777	0.815976	0.486548	0.960489	0.694578	0.788182	0.948645
3595	23035	DATA	55734	340	138	ref|NM_030612|ref|NM_001159394|ref|NM_001159395|ens|ENSMUST00000096026	mm|chr16:55817918-55817859	0	NA	1605	CAGGTAGAGCAGGAAGAAAGCAAATTGGCAAATATTCCCCAGGACCAGTTCCTCGCTAGG	50245	0	A_55_P2039086	Nfkbiz	NM_030612	ref|Mus musculus nuclear factor of kappa light polypeptide gene enhancer in B cells inhibitor, zeta (Nfkbiz), transcript variant 1, mRNA [NM_030612]	2.13646	0.486873	0.727089	0.219531	4.57067	2	0	0	0	0.450312	0.837034	1.06083	2.07632	2.65061	1.68245	0.000592	0.538452	0.522136	0.678993	0.535593	0.966681
3596	23036	DATA	55737	340	141	ref|NM_134141|ens|ENSMUST00000162589|ens|ENSMUST00000161762|ens|ENSMUST00000162538	mm|chr8:97356522-97356463	0	NA	167	ACAAGTCATCTCCTGAGGAAGCCCTAAAAAAGCTGGTGGCTAGACTGAAAGAGTTAACTG	50251	0	A_55_P2740927	Ciapin1	NM_134141	ref|Mus musculus cytokine induced apoptosis inhibitor 1 (Ciapin1), mRNA [NM_134141]	1.28653	0.187348	1.0272	0.0781296	2.21279	2	0	0	0	0.844784	0.74518	1.02137	1.49498	1.23239	1.13221	0.821875	0.856879	0.768729	1.09678	0.94268	1.04214
3600	23071	DATA	55815	341	55	ref|NM_027707|ref|NM_201232|ens|ENSMUST00000052965|ref|XM_011245334	mm|chr15:8293560-8293501	0	NA	3618	ACGCAAGCGTAGCACAGTTAATGAAAAGCCAAAATATGCTGAAATCAGTTCAGATGAAGA	50392	0	A_65_P14913	Nipbl	NM_027707	ref|Mus musculus Nipped-B homolog (Drosophila) (Nipbl), transcript variant a, mRNA [NM_027707]	1.16926	0.077576	0.976484	0.120139	2.33475	3	0	0	0	0.406752	1.14586	1.08251	1.21377	1.07968	1.21432	0.946764	1.0999	0.880996	1.04856	1.0431	0.837795
3620	23216	DATA	56183	343	95	ens|ENSMUST00000180224|nap|NAP111303-1	mm|chr13:12470689-12470748	0	NA	264	ATCAACGTATGGATTGAGCATATCAAGCACTCAAAGAGCAGAGACAGCTTCCTGAAGCAG	50759	0	A_55_P2033845	ENSMUST00000180224	ENSMUST00000180224	ens|predicted gene 5445 [Source:MGI Symbol;Acc:MGI:3644181] [ENSMUST00000180224]	1.13231	0.0381062	0.918599	0.0694955	4.67025	3	0	0	0	1.28562	1.3192	0.567453	1.11551	1.17592	1.10548	1.06628	1.05162	0.557107	0.93501	0.978421	0.842367
3624	23268	DATA	56306	344	54	ref|NM_001177694|ref|NM_001034860|ens|ENSMUST00000179064|ens|ENSMUST00000194595	mm|chr3:92878478-92878538	0	NA	1035	CTGGCTTCTACACATCGTATTTTCGGGCCCTCCCTTTCAAACAACTTAAGCGGTCTTTAA	50686	0	A_55_P2039761	Gm4858	NM_001177694	ref|Mus musculus predicted gene 4858 (Gm4858), transcript variant 1, mRNA [NM_001177694]	1.23126	0.349321	0.792018	0.054508	2.15189	2	0	0	0	1.59482	0.694886	1.14959	1.06354	0.997431	1.63281	1.20564	1.28498	0.000237	0.831456	0.729818	0.814779
3625	23275	DATA	56319	344	67	ref|NM_013559|ens|ENSMUST00000074846|ref|XM_006504914|ref|XM_006504916	mm|chr5:150420169-150420110	0	NA	2728	CAAAAATAATCTTGGTGCTGAAGCTCCGCATCAGAATGGTGAATGCCACCCTAATGAGAA	50711	0	A_55_P2003513	Hsph1	NM_013559	ref|Mus musculus heat shock 105kDa/110kDa protein 1 (Hsph1), mRNA [NM_013559]	1.60541	0.246919	1.01295	0.144279	3.58825	3	0	0	0	0.823871	0.517438	0.826627	1.32496	1.79012	1.70116	0.860084	0.809994	0.306889	0.889073	1.17136	0.978418
3635	23304	DATA	56396	344	144	ref|NM_001136079|ref|NM_008965|ens|ENSMUST00000047379|gb|AK156428	mm|chr15:5183481-5183422	0	NA	3244	CTGATACTGATATGATTTTAAAGCGTAGCTGAACCGACTGAAACTATTATGGAGATTACA	50850	0	A_55_P2747136	Ptger4	NM_001136079	ref|Mus musculus prostaglandin E receptor 4 (subtype EP4) (Ptger4), transcript variant 1, mRNA [NM_001136079]	1.41293	0.444475	0.826313	0.0662286	2.26099	2	0	0	0	0.958789	0.905407	0.883339	1.35811	1.88227	0.998406	0.802214	0.880712	0.851814	0.819868	0.895529	0.763543
3639	23328	DATA	56468	345	52	gb|CD775100|tc|TC1610407	mm|chr15:5169738-5169679	0	NA	589	AGCTAGCATGTGTAAGGGGCCATACCAAGTGGCTCACATATACTTCTACACAGGAAAAAA	50972	0	A_55_P2303717	AW413774	CD775100	gb|UI-M-AQ0-cix-n-17-0-UI.s1 NIH_BMAP_MHI Mus musculus cDNA clone UI-M-AQ0-cix-n-17-0-UI 3', mRNA sequence [CD775100]	1.30547	0.102633	0.988581	0.211947	2.33079	2	0	0	0	0.985482	1.01933	0.958306	1.35879	1.18716	1.37047	0.000572	2.15357	0.000572	0.764261	1.18549	1.016
3640	23329	DATA	56469	345	53	ref|NM_027287|ref|NM_025926|ens|ENSMUST00000029669|ens|ENSMUST00000144950	mm|chr3:151849523-151849464	0	NA	915	CAAAATCACTTTTCCGAGGGAAGGCGATGAAACACCAAATAGTATCCCAGCAGACATTGT	50974	0	A_52_P621617	Dnajb4	NM_027287	ref|Mus musculus DnaJ (Hsp40) homolog, subfamily B, member 4 (Dnajb4), transcript variant 1, mRNA [NM_027287]	1.29865	0.158396	1.07539	0.0456256	2.346	2	0	0	0	0.737532	0.749825	0.870609	1.3639	1.11806	1.414	0.901206	0.933272	0.685424	1.11405	1.08706	1.02506
3647	23365	DATA	56555	345	139	ens|ENSMUST00000185330	mm|chr1:125653655-125653714	0	NA	520	TTGATGTTTATCCAGAGGAATGGGGTTATGGTGGCTGAGAAGTTAGCTAGACTAGAACCT	51133	0	A_66_P101082	ENSMUST00000185330	ENSMUST00000185330	ens|predicted gene 28929 [Source:MGI Symbol;Acc:MGI:5579635] [ENSMUST00000185330]	1.25802	0.253802	0.91964	0.0288842	2.29446	2	0	0	0	1.21417	1.21751	0.765001	1.23207	1.0182	1.52381	0.399708	0.695974	1.17464	0.951827	0.911119	0.895976
3659	23474	DATA	56837	347	93	ens|ENSMUST00000114270|ens|ENSMUST00000155097|ens|ENSMUST00000101298|gb|AB220919	mm|chr5:35422363-35422422	0	NA	1528	CCAGCTTTCTTTTTGTCATGTTCAATCTGTGGCGGACTCAAGGTAAAGCCCCCTCCCTGA	51350	0	A_55_P2741057	Dok7	ENSMUST00000114270	ens|docking protein 7 [Source:MGI Symbol;Acc:MGI:3584043] [ENSMUST00000114270]	1.17585	0.172041	0.820214	0.0374575	3.49848	2	0	0	0	1.11896	1.09344	0.998813	1.01764	1.15091	1.359	1.01269	1.01764	0.770265	0.810322	0.788696	0.861625
3668	23505	DATA	56896	347	152	ref|NM_025836|ens|ENSMUST00000019726|gb|AK012517|gb|AK003971	mm|chr17:56418488-56418429	0	NA	2055	GGATGTTGCAATTGTTTCAGATGAGAAAGTGAGGGCCGAGTACACTGTTCCTCAAATCCT	51457	0	A_51_P223404	Plin3	NM_025836	ref|Mus musculus perilipin 3 (Plin3), mRNA [NM_025836]	1.18363	0.0350773	1.03161	0.0571761	3.92545	3	0	0	0	0.905619	0.753425	0.939619	1.17534	1.15345	1.22211	0.875353	0.938636	0.941623	1.02967	1.08973	0.975427
3669	23516	DATA	56930	348	22	ref|NM_007913|ens|ENSMUST00000165033|ens|ENSMUST00000064795|gb|AK037837	mm|chr18:35024395-35024454	0	NA	2856	ACTGAAAATGTAAATTTATACATCTATTCAGGAGTTGGAGTGTTGTGGTTACCTACTGAG	51222	0	A_51_P367866	Egr1	NM_007913	ref|Mus musculus early growth response 1 (Egr1), mRNA [NM_007913]	3.38263	1.0127	0.238716	0.0543096	5.36941	2	0	0	0	0.169599	0.199431	0.231086	2.99269	2.62285	4.53233	0.130056	0.216363	0.18944	0.301407	0.208756	0.205986
3695	23689	DATA	57353	350	117	ref|NM_197980|ens|ENSMUST00000197520|gb|AK003697|gb|AK007984	mm|chr5:139813901-139813842	0	NA	635	AACCTGTCAATGAAACCAAGCGACAGGAAAATGTCCGCCTTTTGTGCTCACAGACTCATA	51699	0	A_52_P177341	Cox19	NM_197980	ref|Mus musculus cytochrome c oxidase assembly protein 19 (Cox19), mRNA [NM_197980]	1.14839	0.0859242	0.910926	0.0236229	4.61561	2	0	0	0	0.957863	0.913351	1.08198	1.13356	1.07086	1.24077	1.17507	0.983543	0.710223	0.930471	0.917631	0.884675
3699	23706	DATA	57391	350	155	ref|NM_001081636|ref|NM_001081635|ref|NM_007632|ens|ENSMUST00000171031	mm|chr17:47736572-47736631	0	NA	2052	CGGGCCACAAGGTTTGGGCTGGTGGCCCATTTCTATCATGCTGCCTTAATAAAGATTTCG	51763	0	A_55_P2918958	Ccnd3	NM_001081636	ref|Mus musculus cyclin D3 (Ccnd3), transcript variant 3, mRNA [NM_001081636]	1.1595	0.0477968	0.956382	0.0327701	6.07076	3	0	0	0	1.04807	0.956382	0.952808	1.16587	1.20379	1.10884	1.00829	0.870597	0.816204	0.991815	0.927165	0.950166
3702	23726	DATA	57435	351	35	ref|NM_001159573|ref|NM_024183|ref|NM_001159574|ens|ENSMUST00000113535	mm|chr5:74992018-74992077	0	NA	1950	CCTCTTCTGTACGTCAGTCCCAGAAATAGATGCTATAAATCTCCTTATTTTTCTGGATAA	51838	0	A_66_P135842	Fip1l1	NM_001159573	ref|Mus musculus FIP1 like 1 (S. cerevisiae) (Fip1l1), transcript variant 1, mRNA [NM_001159573]	1.19433	0.141673	0.968035	0.0546023	2.5815	2	0	0	0	0.971261	0.991171	1.14279	1.11884	1.10638	1.35776	0.927543	0.760329	0.719813	0.941327	0.931929	1.03085
3706	23752	DATA	57491	351	91	ref|NM_026872|ens|ENSMUST00000030143|ens|ENSMUST00000108068|ref|XM_006538223	mm|chr4:41141410-41141351	0	NA	4306	AGGTGGACAGCTGTTTCAGGGTTTTCTCTCACCCAAACTCCACCTAATAAAATCCTGAGA	51938	0	A_55_P2000219	Ubap2	NM_026872	ref|Mus musculus ubiquitin-associated protein 2 (Ubap2), mRNA [NM_026872]	1.14862	0.0607493	1.03238	0.0478992	2.60252	3	0	0	0	1.07509	1.00147	0.747111	1.13675	1.09469	1.21443	0.961794	0.922834	0.748688	1.07843	0.982827	1.03589
3712	23785	DATA	57562	351	162	ref|NM_134189|ens|ENSMUST00000066987|ref|XM_006532386|ref|XM_006532391	mm|chr11:57600941-57601000	0	NA	4639	GAATGACTTATCCTGTTCAGTTGTGACTGTGGTTGTTCAATAAACCTCCAGACTTTCTCT	52055	0	A_55_P2098880	Galnt10	NM_134189	ref|Mus musculus UDP-N-acetyl-alpha-D-galactosamine:polypeptide N-acetylgalactosaminyltransferase 10 (Galnt10), mRNA [NM_134189]	1.1185	0.0171114	1.06633	0.0246839	3.00885	3	0	0	0	1.0585	0.800359	1.01203	1.12344	1.13261	1.09947	1.06083	0.727232	0.78654	1.06725	1.0412	1.09054
3716	23809	DATA	57621	352	57	ref|NM_177150|ens|ENSMUST00000040776|ref|XM_006531104|ref|XM_011248407	mm|chr8:108369068-108369009	0	NA	1354	TATTTCCAGCACCTTTGCAATGACCTGGAGGTATTTGCTTCTCATGCTGGCCGTAAGATT	51879	0	A_52_P537566	Cenpt	NM_177150	ref|Mus musculus centromere protein T (Cenpt), mRNA [NM_177150]	1.42403	0.119251	0.979607	0.152718	3.97275	3	0	0	0	0.650767	1.01714	0.931916	1.39313	1.32328	1.55569	0.717743	1.47122	0.0003	1.02838	0.80846	1.10198
3719	23821	DATA	57662	352	98	ens|ENSMUST00000091829|ref|XM_011244253|ref|XM_011244254|ref|XM_006516477	mm|chr13:9173098-9173157	0	NA	5120	AGACAGGAATTTCAAGTGATTCCTCTCTCATAGTCAGTGTCATGATGTCTCTGTGAACCC	51953	0	A_65_P08741	Larp4b	ENSMUST00000091829	ens|La ribonucleoprotein domain family, member 4B [Source:MGI Symbol;Acc:MGI:106330] [ENSMUST00000091829]	1.12876	0.0360705	0.944848	0.0443906	5.56916	3	0	0	0	0.980496	0.907438	0.957025	1.16992	1.11372	1.10264	0.875041	0.94843	1.11074	0.973554	0.967273	0.893719
3765	24087	DATA	58307	356	87	ref|NM_012047|ens|ENSMUST00000135471|ref|XM_006531047|ref|XM_006531046	mm|chr8:90881855-90881491	0	NA	568	TAAGATTAGACTTACCTCCTGAGAAGCCTCTTACAAGCTCGTTAGCCAAACAAGAAGAAG	52518	0	A_55_P2620865	Brd7	NM_012047	ref|Mus musculus bromodomain containing 7 (Brd7), mRNA [NM_012047]	1.15242	0.0797729	1.00518	0.0723404	2.3683	3	0	0	0	0.887749	0.903586	0.901564	1.24357	1.11839	1.09531	0.974345	0.905158	0.954802	0.999335	1.08026	0.935933
3770	24135	DATA	58418	357	34	ref|NM_025560|ens|ENSMUST00000044007|ref|XM_006533941|gb|AK007842	mm|chr11:120318081-120318022	0	NA	646	CTGAGCCATTTTACCCGGGACTCCTTATCATGGACAGACACTACCCTTAAGGAACCAGAG	52719	0	A_51_P142046	Oxld1	NM_025560	ref|Mus musculus oxidoreductase like domain containing 1 (Oxld1), mRNA [NM_025560]	1.06289	0.0651557	0.95154	0.0424064	2.48095	3	0	0	0	1.04748	0.935603	1.07369	1.13577	1.01026	1.04266	1.06908	1.05839	0.772452	0.944725	0.912955	0.996942
3805	24355	DATA	58937	360	61	ref|NM_024471|ref|XM_006504194|gb|AK077192|tc|TC1779470	mm|chr5:65800340-65800399	0	NA	1561	GGAACGGCTTGCTGTTGCCATTGTAATTCAAGTCTATGAACATTTAGAAGATCTTATAAA	53066	0	A_55_P2496764	Lias	NM_024471	ref|Mus musculus lipoic acid synthetase (Lias), mRNA [NM_024471]	1.12839	0.0990156	1.03498	0.0300765	1.56342	2	0	0	0	1.00445	1.08776	0.824816	1.05936	1.08398	1.24184	1.14693	0.92209	0.523812	1.04516	1.05865	1.00114
3842	24526	DATA	59365	362	161	ref|NM_008761|ref|NM_001111073|ref|NM_001287213|ref|NM_001287217	mm|chr7:31817883-31817824	0	NA	883	AACATGAAAGAATCCTGAAAGGAAGAGGCCACTGGAGGGAGTCAGGCTTAAGGCTAATGG	53529	0	A_51_P381260	Fxyd5	NM_008761	ref|Mus musculus FXYD domain-containing ion transport regulator 5 (Fxyd5), transcript variant 2, mRNA [NM_008761]	1.22475	0.0475984	0.889335	0.0498272	8.43078	3	0	0	0	1.12352	0.792543	1.12979	1.27751	1.18504	1.21169	1.01173	0.884519	0.71565	0.935405	0.836452	0.896148
3866	24720	DATA	59859	365	163	ref|NM_172439|ens|ENSMUST00000154756|ens|ENSMUST00000110018|ens|ENSMUST00000044507	mm|chr11:3394445-3394386	0	NA	3302	GGAACGGACAGATATTCCCATCTTGGAGGTCATCCATTAGGAATTAAATTCTCCAGCTTC	54093	0	A_55_P2115871	Inpp5j	NM_172439	ref|Mus musculus inositol polyphosphate 5-phosphatase J (Inpp5j), mRNA [NM_172439]	1.22866	0.187309	0.971828	0.0413649	2.31906	2	0	0	0	1.22374	0.663269	0.929561	1.08513	1.16031	1.44055	1.02826	0.740122	0.813584	0.984241	0.925678	1.00557
3869	24732	DATA	59889	366	29	ref|NM_028057|ens|ENSMUST00000127412|ens|ENSMUST00000186489|ens|ENSMUST00000172795	mm|chr1:136303704-136304184	0	NA	368	AAGGCTATGTAGATCTTGTCATCAAGGTTTATCTGAAAGGTGTGCACCCCAAATTTCCTG	53864	0	A_52_P315369	Cyb5r1	NM_028057	ref|Mus musculus cytochrome b5 reductase 1 (Cyb5r1), mRNA [NM_028057]	1.31269	0.153174	1.06792	0.116816	2.20085	3	0	0	0	0.828552	0.869873	0.933786	1.29139	1.17129	1.47541	0.950006	0.677362	0.598581	1.11964	1.14995	0.934172
3871	24749	DATA	59915	366	55	gb|X73360|tc|TC1587872	mm|chr9:61264660-61264720	0	NA	2709	CGCACGCCCTTCGTGGATTGATGTGTCTGACAGACTTGAAGGACTTTCTCCTCTCCCCCT	53910	0	A_51_P151003	Tle3	X73360	gb|M.musculus mESG mRNA. [X73360]	1.17874	0.0321951	1.02124	0.0533202	4.37967	3	0	0	0	0.899606	0.950004	0.886696	1.21321	1.14945	1.17357	1.46996	0.709487	0.484293	1.0566	1.04721	0.959914
3873	24755	DATA	59928	366	68	ref|NM_172721|ens|ENSMUST00000049474|gb|AK210434|gb|AK053794	mm|chr5:118516918-118516859	0	NA	3049	TGGGCTTCGCAGCCATGAAAGGCCACTGAAGAGCAGAGGTGACTAGAGTAGTTTCAAGCA	53931	0	A_66_P111401	Fbxw8	NM_172721	ref|Mus musculus F-box and WD-40 domain protein 8 (Fbxw8), mRNA [NM_172721]	0.951657	0.0804609	1.0976	0.0377116	2.84467	2	0	0	0	1.1546	1.0604	0.765783	0.885852	1.04136	0.927758	1.13638	1.12362	0.61146	1.10841	1.05566	1.12872
3880	24785	DATA	60002	366	142	ref|NM_010831|ens|ENSMUST00000024839|gb|AK141817|gb|U11494	mm|chr17:31981314-31981255	0	NA	4390	GGAATCGTTTCATTTCTCATGTTAATGTGAGAGACGTATGCCAAATGATTAGTTGATGTA	54059	0	A_55_P2061278	Sik1	NM_010831	ref|Mus musculus salt inducible kinase 1 (Sik1), mRNA [NM_010831]	1.88615	0.12474	0.714584	0.111261	12.14	3	0	0	0	0.448762	0.467289	0.836891	1.8701	2.01813	1.77021	0.862299	0.87808	0.704484	0.842099	0.637255	0.664399
3881	24800	DATA	60038	367	14	ref|NM_007904|ref|NM_001136061|ref|NM_001276296|ens|ENSMUST00000172237	mm|chr14:104214543-104214484	0	NA	3293	AAGGACGCCCCAGATCTTCAATTTTAAGTTAGTTATTGGCTCCCCAGTAGTTTCACAGCG	54122	0	A_52_P577662	Ednrb	NM_007904	ref|Mus musculus endothelin receptor type B (Ednrb), transcript variant 1, mRNA [NM_007904]	1.14817	0.166722	0.856516	0.045396	2.92355	2	0	0	0	1.01966	0.881339	1.02656	1.13076	1.32292	0.990843	1.18831	0.939428	0.930631	0.804178	0.885207	0.880164
3885	24817	DATA	60076	367	52	ref|NM_011042|ref|NM_001174073|ref|NM_001103166|ref|NM_001103165	mm|chr15:102305020-102305079	0	NA	385	CAACATCTCAGAAGGGAATTGTCCTGAGAGAATTATCACTTTGGCTGGACCGACTAATGC	54190	0	A_52_P635718	Pcbp2	NM_011042	ref|Mus musculus poly(rC) binding protein 2 (Pcbp2), transcript variant 2, mRNA [NM_011042]	1.19404	0.0952861	1.00038	0.0525786	3.08213	3	0	0	0	1.03488	1.01462	0.888968	1.13105	1.1474	1.30366	1.06908	0.90467	0.504535	1.05867	0.985938	0.956526
3895	24883	DATA	60227	368	39	ref|NM_053094|ref|NM_001170395|ens|ENSMUST00000112541|ens|ENSMUST00000032234	mm|chr6:124280484-124280543	0	NA	4347	CAGTGCATCATGTCCAAATATGACATGTCCAAAAATGTTATTAATAAAGAAACGGAAATC	54167	0	A_51_P231042	Cd163	NM_053094	ref|Mus musculus CD163 antigen (Cd163), transcript variant 2, mRNA [NM_053094]	1.50286	0.101268	1.09965	0.176495	3.43207	3	0	0	0	0.744839	0.867948	0.942081	1.60744	1.40527	1.49586	0.828751	0.390807	0.418053	1.09645	0.924781	1.27773
3907	24982	DATA	60456	369	104	ref|NM_021303|ens|ENSMUST00000179886|ens|ENSMUST00000179543|gb|BC020013	unmapped	0	NA	2352	ACAGGCTTTTATTGTTACAGCACAGCAGAACAAGTGTACTAGGAGCCATTTTGACCCTGA	54577	0	A_51_P169920	Noc2l	NM_021303	ref|Mus musculus nucleolar complex associated 2 homolog (S. cerevisiae) (Noc2l), mRNA [NM_021303]	1.08057	0.0434778	0.964102	0.0729381	2.37576	3	0	0	0	1.02055	0.97192	1.13245	1.11039	1.03069	1.10065	1.00896	1.10999	0.622108	1.01551	0.996168	0.880625
3927	25101	DATA	60732	371	52	ref|NM_001220498|ref|NM_001166601|ref|NM_001166646|ens|ENSMUST00000169006	mm|chrX:52699990-52700049	0	NA	570	ACATCATTAAGCATACTCTGAAGTACTCTTCTACATTCCCATCTTCAGACTAATGAAGCA	54776	0	A_55_P1974636	Gm14625	NM_001220498	ref|Mus musculus predicted gene 14625 (Gm14625), mRNA [NM_001220498]	1.70419	0.312409	0.924437	0.217099	3.55004	3	0	0	0	0.9738	0.531381	0.463683	1.91983	1.34592	1.84681	1.20618	0.417033	0.52205	0.895254	1.15465	0.723407
3935	25125	DATA	60782	371	102	ref|NM_028096|ref|XM_006496296|ref|XM_006496297|ref|XM_006496291	mm|chr1:37668656-37668597	0	NA	4225	GAGAAGGAGAGGAAGGGACGTGGCAGGGTTTGTCAATTCATAGACTGTTTCCAAAAAGAA	54869	0	A_51_P333622	2010300C02Rik	NM_028096	ref|Mus musculus RIKEN cDNA 2010300C02 gene (2010300C02Rik), mRNA [NM_028096]	1.56191	0.207055	0.94637	0.192722	3.76909	3	0	0	0	0.793987	0.932744	1.01222	1.71576	1.3265	1.64348	0.752194	0.70043	0.283579	0.918702	1.15143	0.768978
3942	25144	DATA	60825	371	145	ref|NM_008036|ens|ENSMUST00000003640|ref|XM_006539543|ref|XM_006539544	mm|chr7:19888227-19888168	0	NA	3593	ACTGCCGACCACAATTCATTGACTCCATAGCCCTCACCCAGGCTGTATTTGTGATTTTTT	54946	0	A_55_P2113051	Fosb	NM_008036	ref|Mus musculus FBJ osteosarcoma oncogene B (Fosb), mRNA [NM_008036]	2.80559	0.848731	0.408777	0.0921886	4.86269	2	0	0	0	0.428231	0.216287	0.512225	3.54405	2.99433	1.87837	0.294879	0.44253	0.462761	0.309496	0.425159	0.491677
3958	25245	DATA	61058	373	50	ref|NM_028316|ref|NM_001146024|ens|ENSMUST00000108566|ens|ENSMUST00000108567	mm|chr7:6139783-6139843	0	NA	450	GGATGTGACCGAAGCCCGGGGGTCAGTGTTGGAAAGGAAGAAAGTGGGGCAATTCCCTTA	55076	0	A_51_P151371	Zfp444	NM_028316	ref|Mus musculus zinc finger protein 444 (Zfp444), transcript variant 2, mRNA [NM_028316]	1.35393	0.0333515	0.961266	0.269689	2.50276	2	0	0	0	1.08575	0.987529	0.710968	1.37149	1.31546	1.37482	1.19448	1.07537	0.000319	0.931365	1.24466	0.707774
3962	25273	DATA	61123	373	115	ref|NM_001024716|ref|NM_001039156|ref|NM_138579|ens|ENSMUST00000109688	mm|chr15:78835968-78836027	0	NA	2228	AACATTTAAACTTTTTAAAAAGGCAATTTCTTGGTGGCGTGTGCCTCAAGCACTGGCTTC	55186	0	A_51_P158103	Triobp	NM_001024716	ref|Mus musculus TRIO and F-actin binding protein (Triobp), transcript variant 1, mRNA [NM_001024716]	1.14507	0.0153114	0.954776	0.0900052	3.61021	2	0	0	0	0.923221	0.887881	1.22702	1.15484	1.12743	1.15296	1.27067	0.841511	0.55015	1.00193	0.850991	1.01141
3969	25317	DATA	61218	374	46	gb|AK080025|gb|AK019998|tc|TC1616852|tc|TC1623429	mm|chr19:36429279-36429338	0	NA	999	GAGAATGTGCAGGTAACTTTAGGTCTGGAGATATTTTACAAACAGGCAAAATTCACAGAA	55069	0	A_66_P118048	Pcgf5	AK080025	gb|Mus musculus adult male aorta and vein cDNA, RIKEN full-length enriched library, clone:A530049F18 product:unclassifiable, full insert sequence. [AK080025]	1.35841	0.128962	0.896642	0.2539	2.80854	2	0	0	0	1.25494	1.14077	0.808231	1.43817	1.20962	1.42743	0.493776	0.62408	0.91305	1.07706	1.00656	0.606302
3974	25380	DATA	61370	375	34	ref|NM_010918|ens|ENSMUST00000182503|ens|ENSMUST00000035112|ref|XM_011242940	mm|chr9:121663455-121663514	0	NA	4510	TCTCTGTACAGATTGTGTCTTAAGTGTAAATACCTGGTAACTTAAAGCTTAAGAAACTGG	55333	0	A_52_P315280	Nktr	NM_010918	ref|Mus musculus natural killer tumor recognition sequence (Nktr), mRNA [NM_010918]	1.4045	0.0239431	0.966076	0.204902	3.68098	2	0	0	0	0.888104	1.0708	0.577944	1.38903	1.39239	1.43208	0.950392	0.39811	1.00293	1.1576	0.750008	0.990617
3975	25381	DATA	61371	375	35	ref|NM_172743|ref|NM_001305189|ref|NM_001305186|ref|NM_001305185	mm|chr7:123332796-123324753	0	NA	137	TTCTGCGGGAGGAGCCACACCCACATATGTCGAAGCCAGAGAGAAACCAAAGACCGTCCA	55335	0	A_52_P211759	Plekha7	NM_172743	ref|Mus musculus pleckstrin homology domain containing, family A member 7 (Plekha7), transcript variant 3, mRNA [NM_172743]	1.2488	0.0551052	0.89843	0.15091	3.77737	2	0	0	0	0.841307	1.14032	0.911132	1.29495	1.18779	1.26367	1.04968	1.02997	0.585909	1.05607	0.755293	0.883929
3980	25415	DATA	61470	375	134	ref|NM_001243117|ref|NM_001243118|ref|NM_001243119|ens|ENSMUST00000177714	mm|chr9_random:202857-202798	0	NA	2625	CATATTGTCATCTAAGGATCGAGGAAAACAGGATGCTTTTAGTAATAAATTCTATTTGCA	55514	0	A_66_P132253	2010315B03Rik	NM_001243117	ref|Mus musculus RIKEN cDNA 2010315B03 gene (2010315B03Rik), transcript variant 1, mRNA [NM_001243117]	0.939375	0.0765625	1.20207	0.0591617	4.70247	3	0	0	0	0.864886	1.03067	0.992126	0.872422	0.922854	1.02285	0.974446	1.08053	0.633013	1.2524	1.1369	1.2169
3984	25456	DATA	61560	376	60	ref|NM_001037134|ref|NM_001282943|ref|NM_009830|ens|ENSMUST00000144438	mm|chr4:11122185-11122244	0	NA	552	GGTTTGGCAAAACATGTTACAAAAGGAAAACAGATACGTGCATGACAAACATTTTCAAGT	55381	0	A_55_P2626866	Ccne2	NM_001037134	ref|Mus musculus cyclin E2 (Ccne2), transcript variant 1, mRNA [NM_001037134]	1.17194	0.0739355	0.752444	0.229663	3.01153	2	0	0	0	1.03641	1.25125	1.34113	1.13865	1.12051	1.25667	1.53972	0.726075	0.332254	0.839161	0.926122	0.492048
3987	25474	DATA	61607	376	107	ref|NM_172558|ref|NM_001166669|ref|NM_001166670|ref|NM_001166671	mm|chr11:57934896-57934837	0	NA	4817	CCAAGACTGTCTCAAGCCTTATGTGGTTTCCCCAAAGAGAAGCCTTTGTATTCACCCAAA	55463	0	A_51_P278184	Gemin5	NM_172558	ref|Mus musculus gem (nuclear organelle) associated protein 5 (Gemin5), transcript variant 2, mRNA [NM_172558]	1.174	0.0682384	0.992832	0.0854176	2.87021	3	0	0	0	0.771194	0.869268	1.08054	1.103	1.17991	1.2391	1.00925	1.15701	0.612246	1.06714	0.899511	1.01184
3998	25531	DATA	61719	377	55	ref|NM_175675|ens|ENSMUST00000062962|gb|AK049408|gb|AK159707	mm|chr5:30961940-30961999	0	NA	2919	CAGCTTCTCTGGACTACAATCTGTCACAGGGAGAAGTAAATGTGCCTCTTTACTCAAGGT	55669	0	A_52_P679205	Slc35f6	NM_175675	ref|Mus musculus solute carrier family 35, member F6 (Slc35f6), mRNA [NM_175675]	1.14429	0.183504	0.978284	0.0191321	1.55848	2	0	0	0	1.09376	0.996729	0.955088	1.07445	1.00597	1.35247	1.11486	0.827936	0.643888	0.976911	0.998065	0.959875
4009	25583	DATA	61840	378	12	ref|NM_018827|ens|ENSMUST00000008032|ref|XM_006509540|ref|XM_006509541	mm|chr8:73027788-73027847	0	NA	1453	TGGAGCCCCTCTGTACCATCTGGGCAACAAAGAAACCTACCAGAGGCTGGGGCACAATGA	55592	0	A_55_P2743495	Crlf1	NM_018827	ref|Mus musculus cytokine receptor-like factor 1 (Crlf1), mRNA [NM_018827]	1.98765	0.407862	0.736193	0.133504	5.05082	2	0	0	0	0.858646	0.60751	0.928539	1.75786	2.45856	1.74653	0.582972	0.850585	0.000213	0.669342	0.889916	0.649322
4014	25627	DATA	61943	378	115	ref|NM_021280|ens|ENSMUST00000017077|ens|ENSMUST00000173791|ens|ENSMUST00000151590	mm|chr2:160587142-160587201	0	NA	3629	ATGTTTAGTGACCAGAACTTCTTGGCTCAGGCTACTTTCCCAGTAAAAGGCCTGAAGACA	55780	0	A_55_P2015860	Plcg1	NM_021280	ref|Mus musculus phospholipase C, gamma 1 (Plcg1), mRNA [NM_021280]	0.994309	0.132517	1.19419	0.0461188	2.46732	2	0	0	0	1.02713	0.956747	0.92192	1.12696	0.861929	0.994036	0.986833	1.08129	0.460595	1.23181	1.20801	1.14274
4018	25651	DATA	62017	379	25	ref|NM_001164336|ref|NM_001164337|ens|ENSMUST00000148105|gb|AK009232	mm|chr19:37285181-37285240	0	NA	380	CCACCGATGAAGATGATAGAACAGCTGAGTGGGTGAGACCATGCAGGTGCAGAGGATCTA	55916	0	A_66_P135305	2022-03-05	NM_001164336	ref|Mus musculus membrane-associated ring finger (C3HC4) 5 (March5), transcript variant 2, mRNA [NM_001164336]	1.20759	0.161887	0.987002	0.0653868	2.18831	2	0	0	0	0.902627	1.08476	1.04799	1.38817	1.07546	1.15913	1.02518	0.852763	0.502911	0.975733	1.05729	0.927982
4029	25729	DATA	62192	380	36	ref|NM_178362|ref|NM_009166|ref|NM_001034963|ref|NM_001034962	mm|chr19:40369382-40369323	0	NA	3467	GTGTATCAGGGATTAACTATCTGCTGAAGACATCTGTATTTACATGACTGCTTCTGGGAG	55937	0	A_51_P253117	Sorbs1	NM_178362	ref|Mus musculus sorbin and SH3 domain containing 1 (Sorbs1), transcript variant 2, mRNA [NM_178362]	1.1995	0.0453649	1.08456	0.0675203	2.44738	3	0	0	0	1.08917	1.00139	0.871219	1.22806	1.22325	1.14719	0.883394	0.61809	0.684529	1.11563	1.13096	1.0071
4042	25806	DATA	62383	381	63	ref|NM_007968|ref|NM_001283061|ref|NM_001283062|ens|ENSMUST00000130060	mm|chr11:4971070-4971011	0	NA	1572	AGGCTCCAGAGGAAACCCCTCTGGAGGAGGAAATGTCCAGCACCGAGCTGGAGACTGGCA	56283	0	A_52_P628455	Ewsr1	NM_007968	ref|Mus musculus Ewing sarcoma breakpoint region 1 (Ewsr1), transcript variant 2, mRNA [NM_007968]	1.47618	0.567541	0.753414	0.0355086	2.20146	2	0	0	0	0.923773	0.910511	0.82128	2.05808	0.924184	1.44626	1.11683	1.0715	0.467335	0.713852	0.763865	0.782524
4046	25843	DATA	62471	381	151	ref|NM_023908|ens|ENSMUST00000026897|gb|AK020010|gb|AK152488	mm|chr7:81426937-81426878	0	NA	4561	ACGGAGGCCCTGGGATGTACTCTGTTTCATGACATGATTTGATTTGATTTTTGGAAAAAA	56444	0	A_55_P1989663	Slco3a1	NM_023908	ref|Mus musculus solute carrier organic anion transporter family, member 3a1 (Slco3a1), transcript variant 1, mRNA [NM_023908]	1.10333	0.0127035	1.00255	0.0639678	2.67654	2	0	0	0	1.1564	1.00827	0.885549	1.09075	1.10309	1.11615	0.836173	0.826155	0.969811	0.929916	1.02724	1.05049
4048	25853	DATA	62498	382	14	ref|NM_177771|ens|ENSMUST00000068025|ens|ENSMUST00000197336|ref|XM_011242974	mm|chr9:110328490-110328431	0	NA	4469	TATAGGACGCATGTCTTTTGTGTTGAGAAACCAAAGAGAAATAAAGAGAACACGCCTAAT	56190	0	A_55_P1965391	Klhl18	NM_177771	ref|Mus musculus kelch-like 18 (Klhl18), mRNA [NM_177771]	1.22972	0.237126	0.906236	0.230939	1.6927	3	0	0	0	1.20788	0.8061	0.924272	1.08853	1.50348	1.09714	0.979306	1.01822	0.656359	1.07232	1.00387	0.642517
4049	25874	DATA	62546	382	62	ens|ENSMUST00000183360	mm|chr9:36600856-36595811	0	NA	227	GTGTCAAAACCTTTCTGCAGGACCTTGGCAGGTGAACCACGTATTGTTAGTAGAATTTTC	56282	0	A_55_P2632678	Ei24	ENSMUST00000183360	ens|etoposide induced 2.4 mRNA [Source:MGI Symbol;Acc:MGI:108090] [ENSMUST00000183360]	1.74823	0.510833	0.815734	0.0948713	3.10859	2	0	0	0	0.535123	1.19799	0.772072	2.23527	1.21654	1.79287	1.07496	0.727626	0.000353	0.900408	0.833591	0.713203
4053	25917	DATA	62660	383	12	ref|NM_153159|ens|ENSMUST00000036188|gb|AK142501|gb|AK154363	mm|chr4:124795929-124795870	0	NA	2533	AGGCGAGATTTAAATATTTTAAATGAAAAAGGTTGACAAAATAAAGGCTATTGCCAGGCA	56480	0	A_51_P297925	Zc3h12a	NM_153159	ref|Mus musculus zinc finger CCCH type containing 12A (Zc3h12a), mRNA [NM_153159]	1.36808	0.0414156	0.873047	0.340157	2.50219	2	0	0	0	1.27058	0.573645	0.934527	1.32906	1.41154	1.36364	1.12796	1.15229	0.217612	0.944024	1.17212	0.503002
4054	25923	DATA	62674	383	26	ref|NM_008842|ens|ENSMUST00000024811|gb|AK154127|gb|AK154669	mm|chr17:29632331-29632390	0	NA	1679	CTTTGGTTTCGACTTAACTGTTTCAAAACCAAGACCTCACACAGAACGCACAACCAATGC	56505	0	A_55_P2736570	Pim1	NM_008842	ref|Mus musculus proviral integration site 1 (Pim1), mRNA [NM_008842]	1.34256	0.209227	0.921441	0.0905186	3.19959	2	0	0	0	1.19133	1.20118	0.520167	1.23742	1.20676	1.58351	0.857437	0.649988	0.787895	1.01431	0.91654	0.833472
4055	25924	DATA	62675	383	27	ref|NM_009053|ens|ENSMUST00000123273|ens|ENSMUST00000026156|ref|XM_006532606	mm|chr11:120642119-120642060	0	NA	2057	TTTACGGGGAGGCCGAGGGGAGCGGTTGCAATGTTGAGTAAAGGCTTCCTTGTCATTCCT	56506	0	A_55_P2109429	Rfng	NM_009053	ref|Mus musculus RFNG O-fucosylpeptide 3-beta-N-acetylglucosaminyltransferase (Rfng), mRNA [NM_009053]	1.15351	0.100517	0.979819	0.104699	2.07278	3	0	0	0	0.911586	1.01441	0.771141	1.2667	1.11916	1.07468	0.863997	0.890542	1.14833	1.0302	1.04981	0.859454
4058	25938	DATA	62704	383	56	ref|NM_172694|gb|AK039319|gb|AK052434|gb|AK035987	mm|chr4:70093183-70093124	0	NA	2839	CAACCTAGAGTCATATGCTCTTTGACTTACCATAGATTCAAGCAATAGATTTTGAAGTCT	56557	0	A_52_P231170	Megf9	NM_172694	ref|Mus musculus multiple EGF-like-domains 9 (Megf9), mRNA [NM_172694]	1.27292	0.192838	1.03418	0.0568535	2.0568	2	0	0	0	0.779732	0.927445	0.858165	1.16553	1.49554	1.15769	0.917837	0.332697	1.26282	0.988533	1.09786	1.01614
4065	25991	DATA	62825	384	13	ref|NM_026703|ens|ENSMUST00000070112|gb|AK088463|gb|AK002744	mm|chr2:35891930-35891871	0	NA	662	ATCACAGACATTAACAAAAAAGTTAATTTATGTGACTTGGCAGTTATTCTATACATTTCC	56483	0	A_51_P475501	Ndufa8	NM_026703	ref|Mus musculus NADH dehydrogenase (ubiquinone) 1 alpha subcomplex, 8 (Ndufa8), mRNA [NM_026703]	1.13631	0.0501709	0.852685	0.24363	1.97497	2	0	0	0	1.18776	0.877472	1.02553	1.07978	1.17553	1.15363	1.00236	1.17961	0.760276	1.07265	0.894586	0.590822
4066	25997	DATA	62845	384	33	ref|NM_148945|ens|ENSMUST00000142668|ens|ENSMUST00000149939|ens|ENSMUST00000112493	mm|chrX:155800637-155800696	0	NA	2360	AGACATCCTTGGATTGTCCACTGGGACCAACTACCACAATACCAACTAAACAGACAGGAT	56517	0	A_52_P283628	Rps6ka3	NM_148945	ref|Mus musculus ribosomal protein S6 kinase polypeptide 3 (Rps6ka3), mRNA [NM_148945]	1.18069	0.124159	0.96694	0.0787794	2.51776	3	0	0	0	0.987631	1.16678	0.899624	1.17438	1.0598	1.30788	1.15323	0.925027	0.424834	0.88113	1.03599	0.983698
4073	26027	DATA	62919	384	107	ref|NM_008858|ens|ENSMUST00000002765|ref|XM_006515586|ref|XM_006515587	mm|chr12:51442810-51442751	0	NA	3185	TGTGTGACCAACTGTGTTGTATTAACAAAAGTTCCCGGAAACACTAAACTTGTTATTGTG	56647	0	A_51_P363338	Prkd1	NM_008858	ref|Mus musculus protein kinase D1 (Prkd1), mRNA [NM_008858]	1.3739	0.3138	0.873514	0.0654417	2.70375	2	0	0	0	0.81057	0.945167	1.06839	1.71245	1.31647	1.09278	0.957027	1.01497	0.46164	0.870638	0.940347	0.809558
4082	26111	DATA	3599	22	155	ref|NM_009482|ens|ENSMUST00000168457|gb|BC138841|gb|BC138842	mm|chr7:147130120-147130179	0	NA	365	TCGCTACAAGTTCCTCAAGGACAAACTCCGAGACTCCCAGGGCCAGCCGTCCGGACCCTT	3425	0	A_51_P237206	Utf1	NM_009482	ref|Mus musculus undifferentiated embryonic cell transcription factor 1 (Utf1), mRNA [NM_009482]	1.6548	0.326862	0.950506	0.171523	3.3047	3	0	0	0	1.31632	0.720747	0.000615	1.34656	1.99755	1.62028	0.000615	1.60286	0.542931	1.07028	1.02722	0.754014
4090	26171	DATA	5900	36	160	ref|NM_146257|ens|ENSMUST00000058418|ref|XM_006504706|ref|XM_011240982	mm|chr5:143198384-143198443	0	NA	2729	CCTGTCTACCTGTGTGTTCTCTGACTACCGCACTGGCCATTAAATATGGCAGAGACTGCC	5560	0	A_55_P2048119	Slc29a4	NM_146257	ref|Mus musculus solute carrier family 29 (nucleoside transporters), member 4 (Slc29a4), mRNA [NM_146257]	1.60213	0.22738	1.16303	0.135649	2.87248	3	0	0	0	0.000402	0.808582	1.23667	1.73114	1.33959	1.73567	0.787798	0.543748	0.327288	1.11666	1.31579	1.05665
4103	26213	DATA	7748	48	40	ref|NM_010244|ens|ENSMUST00000094481|nap|NAP011260-001	mm|chr4:147243749-147243808	0	NA	661	AAGCAGATGCCCCTCAGATCCAGTCTTCAACATCCTTAGTTACTTCTGAACCTGTCACCA	7154	0	A_51_P421223	Fv1	NM_010244	ref|Mus musculus Friend virus susceptibility 1 (Fv1), mRNA [NM_010244]	1.60647	0.149301	1.33289	0.267114	1.54851	3	0	0	0	0.863882	1.03896	0.000672	1.53392	1.77818	1.50731	0.000672	1.27705	0.000672	1.02495	1.50199	1.47174
4107	26239	DATA	9341	57	157	ref|NM_016692|ens|ENSMUST00000025562|ref|XM_006526712|ref|XM_006526707	mm|chr19:9947296-9947237	0	NA	2707	ATCTATTCTCCCACTGGACTTGGAGGACATCTTTAAGAAGAGGAAGACTCGCTACCACAA	8821	0	A_55_P2741005	Incenp	NM_016692	ref|Mus musculus inner centromere protein (Incenp), mRNA [NM_016692]	1.5149	0.0710166	1.18073	0.0870123	5.15344	3	0	0	0	0.000219	0.698427	1.06523	1.43295	1.55328	1.55847	0.995044	0.646469	0.507731	1.10397	1.16295	1.27525
4111	26259	DATA	10431	64	99	ens|ENSMUST00000130120|gb|AK122317|gb|BC051491|gb|EH102513	mm|chr11:116699369-116699310	0	NA	3915	AAAGAACATTGTTCCTCTGTAGACAAACTTGACAGTGAATTTTGTTGTTTAGAAGAGAGG	9604	0	A_52_P428721	Jmjd6	ENSMUST00000130120	ens|jumonji domain containing 6 [Source:MGI Symbol;Acc:MGI:1858910] [ENSMUST00000130120]	1.37528	0.223502	0.783518	0.0761542	4.34087	2	0	0	0	2.02247	2.04736	0.000711	1.60102	1.15409	1.37074	0.000711	1.45165	0.000711	0.809697	0.843129	0.697727
4112	26274	DATA	11152	68	164	ref|NM_001289617|ens|ENSMUST00000164375|gb|AK035743|tc|TC1587392	mm|chr6:42310083-42310142	0	NA	3269	TAGGTTCCAGGCTGTAGCCAAAAGCTTGTACTAGTAGGTCCTCCAAGATATGTGACATCT	10325	0	A_55_P2503485	Zyx	NM_001289617	ref|Mus musculus zyxin (Zyx), transcript variant 2, mRNA [NM_001289617]	2.21277	0.953645	0.882517	0.196447	2.36638	2	0	0	0	0.000467	0.617554	0.831054	3.30633	1.554	1.778	0.000467	0.87986	0.384727	0.694165	1.08616	0.867221
4114	26279	DATA	11316	69	164	ref|NM_146182|ref|NM_001286038|ref|NM_001286039|ens|ENSMUST00000154419	mm|chr7:19979921-19979862	0	NA	1716	CTGGGCAGCTCTTGTAGATCGCTCCCTGCAATTAAAGGCGGTGCACTGGTACTGGGTGTT	10626	0	A_51_P154753	Klc3	NM_146182	ref|Mus musculus kinesin light chain 3 (Klc3), transcript variant 2, mRNA [NM_146182]	2.08351	0.602066	0.835049	0.182686	3.4369	2	0	0	0	0.000411	0.5658	0.982868	2.463	1.38931	2.39822	0.000411	0.662099	1.03273	0.982182	0.892395	0.630571
4123	26335	DATA	14148	87	44	ens|ENSMUST00000151172|ref|XM_006531284|gb|AK086714|tc|TC1588167	mm|chr8:128261967-128262026	0	NA	429	TCCGATGACATCCCGAGTGGAGAGTCCAGCTTTGGGCATTGGATCCATATACAGAATTGA	13077	0	A_55_P2160143	Ntpcr	ENSMUST00000151172	ens|nucleoside-triphosphatase, cancer-related [Source:MGI Symbol;Acc:MGI:1913816] [ENSMUST00000151172]	1.55214	0.20071	1.11388	0.18544	2.77784	3	0	0	0	1.53853	1.27604	0.00081	1.78247	1.41471	1.45924	0.00081	1.18494	0.00081	1.15187	1.27739	0.912389
4125	26348	DATA	14535	89	103	ref|NM_028833|ens|ENSMUST00000077890|ens|ENSMUST00000136385|ens|ENSMUST00000147839	mm|chr5:141141297-141141238	0	NA	2520	TGAGGTGGCTGGGGACAAGTCAGAGGACTCTAAATCTTGCTAGGGAAGAGCCCTGCCTCA	13482	0	A_51_P178251	Iqce	NM_028833	ref|Mus musculus IQ motif containing E (Iqce), mRNA [NM_028833]	1.96775	0.280798	0.49976	0.863168	2.8012	2	0	0	0	1.25373	1.92917	0.00140987	2.26049	1.9421	1.70066	0.00140987	1.41034	0.00140987	0.00140987	1.49646	0.00140987
4126	26357	DATA	15153	93	65	ens|ENSMUST00000131236|gb|AK086142|tc|TC1612052|riken|D930007P05	mm|chr2:52029182-52029123	0	NA	2270	GGACAACCCCATGATTCCCTGAGCTTATATGTACATTTTCTGTACCATATTTTAATCATA	14006	0	A_55_P2718815	Neb	ENSMUST00000131236	ens|nebulin [Source:MGI Symbol;Acc:MGI:97292] [ENSMUST00000131236]	2.03057	0.355564	0.454181	0.784891	3.16871	2	0	0	0	1.69625	1.46246	0.00102389	1.68985	2.39932	2.00256	0.00102389	1.38396	0.00102389	1.36049	0.00102389	0.00102389
4128	26383	DATA	16884	103	156	gb|AK036758|gb|BB140799|riken|9930001L01|nap|NAP002803-002	mm|chrX:12320194-12320135	0	NA	1722	CGACAACATATACGCACCCTTGGAATCTATATGATTTCATTGTGACATTTCAAATGTGTA	15649	0	A_52_P574685	Med14	AK036758	gb|Mus musculus adult female vagina cDNA, RIKEN full-length enriched library, clone:9930001L01 product:cofactor required for Sp1 transcriptional activation subunit 2 (150 kDa), full insert sequence. [AK036758]	2.37152	0.434884	0.00153634	1.43e-10	9.43914	2	0	0	0	1.8253	1.73108	0.00153634	1.9678	2.31476	2.83199	0.00153634	0.00153634	1.31985	0.00153634	0.00153634	0.00153634
4131	26395	DATA	17448	107	64	ref|NM_153399|ens|ENSMUST00000041639|gb|AK122550|gb|AK028641	mm|chr10:5009507-5009566	0	NA	6896	GATTGATGACATTGTGTGTTGTGTATCTGACTTACAGATTCAAAGTCAATATTGTGTGCA	16075	0	A_55_P2026295	Syne1	NM_153399	ref|Mus musculus spectrin repeat containing, nuclear envelope 1 (Syne1), transcript variant 1, mRNA [NM_153399]	1.71925	0.344086	0.871313	0.227637	3.55979	3	0	0	0	1.24822	1.46088	0.000536	1.57614	1.46981	2.11179	0.000536	1.51761	0.000536	0.822022	0.67236	1.11956
4142	26461	DATA	21604	132	120	ref|NM_019931|ens|ENSMUST00000079169|ens|ENSMUST00000118360|gb|AF107781	mm|chr3:105471938-105471997	0	NA	1778	TAATTTGAAAGCAGACGATGGACTGAGACCAAACTGCAAAACATCCCAGATTACCACGGC	19732	0	A_55_P1965488	Kcnd3	NM_019931	ref|Mus musculus potassium voltage-gated channel, Shal-related family, member 3 (Kcnd3), transcript variant 2, mRNA [NM_019931]	1.81799	0.523272	0.665722	0.580335	2.55409	3	0	0	0	0.945673	0.000936	1.74209	1.26173	2.30043	1.89181	1.85828	0.000936	0.000936	0.925086	1.07114	0.000936
4144	26471	DATA	22056	135	80	ref|NM_053250|ref|NM_181664|ens|ENSMUST00000024764|ens|ENSMUST00000113465	mm|chr17:46568642-46568701	0	NA	935	CACTGCATGAGCTTCAAAGTGTATTCGTCAAGGTCACTGCGTTCCCTGACTTCTCTAATA	20238	0	A_51_P325501	Crip3	NM_053250	ref|Mus musculus cysteine-rich protein 3 (Crip3), transcript variant TLP-B, mRNA [NM_053250]	1.12393	0.168862	1.56894	0.0858875	4.06856	2	0	0	0	1.06751	0.824669	0.000285	1.31653	1.05398	1.00128	0.47809	0.923895	0.626929	1.51735	1.66809	1.52139
4148	26502	DATA	24042	147	98	ref|NM_029053|ref|NM_001145435|ens|ENSMUST00000138839|ens|ENSMUST00000100123	mm|chr16:17545721-17545662	0	NA	1067	CAGAGAATGTGAGGACCTCGCTAGCTCCATGAGTGAAATTCTTCCAGGACTCTGTATAAA	22047	0	A_52_P347764	Lrrc74b	NM_029053	ref|Mus musculus leucine rich repeat containing 74B (Lrrc74b), transcript variant 1, mRNA [NM_029053]	1.18774	0.209748	0.76373	0.120607	3.03535	3	0	0	0	2.78327	1.12	0.000705	0.956143	1.36491	1.24216	0.000705	1.57341	0.667508	0.677346	0.901523	0.71232
4149	26504	DATA	24142	148	34	ref|NM_198957|ens|ENSMUST00000095143|ens|ENSMUST00000063839|ref|XM_006538366	mm|chr4:12022675-12022734	0	NA	2682	GGATTGCCTTTAGGAGAAGCTATCGTTTCTATGACAAATTATAATGAAGCTCTATCTGCA	21931	0	A_55_P2084128	Rbm12b2	NM_198957	ref|Mus musculus RNA binding motif protein 12 B2 (Rbm12b2), mRNA [NM_198957]	1.11358	0.134558	1.67384	0.33446	2.69173	2	0	0	0	0.694031	1.57088	0.000532	1.04105	1.26884	1.03085	0.000532	1.37122	0.000532	1.86227	1.28768	1.87158
4150	26507	DATA	24209	148	101	ens|ENSMUST00000012281|gb|AK135704|gb|AK160412|gb|BB700481	mm|chr9:75747841-75747900	0	NA	3545	TCAAGCAAGAATCCATCCTTACTAACTTTCAGACATTGTGGCTTGTTTGTAATTCAGATA	22054	0	A_65_P06881	Bmp5	ENSMUST00000012281	ens|bone morphogenetic protein 5 [Source:MGI Symbol;Acc:MGI:88181] [ENSMUST00000012281]	1.56872	0.163629	1.21529	0.353752	1.57062	2	0	0	0	0.729447	1.38224	0.000549	1.44608	1.50557	1.75452	0.000549	1.53463	0.000549	0.8077	1.39574	1.44242
4155	26527	DATA	25467	156	47	ref|NM_023879|ref|NM_001168515|ens|ENSMUST00000180646|ens|ENSMUST00000111603	mm|chr14:52779875-52779934	0	NA	4073	TGAAGATCTGTTTTCATGAAAGTACAAGTTCTACTCCACTCAACGATTTGAGGGCATCAC	23124	0	A_66_P130940	Rpgrip1	NM_023879	ref|Mus musculus retinitis pigmentosa GTPase regulator interacting protein 1 (Rpgrip1), transcript variant 1, mRNA [NM_023879]	1.45889	0.0340337	1.00843	0.0856825	8.46283	2	0	0	0	1.26138	1.66098	0.000484	1.4196	1.47934	1.47773	0.892046	0.78266	0.000484	1.10517	0.978022	0.942098
4163	26591	DATA	27567	169	15	ref|NM_001195596|ens|ENSMUST00000179685|gb|AK008073|tc|TC1621368	mm|chr10:25247841-25247782	0	NA	581	CAATGCACCAGGCGTATCTTGAGTTTCTTTGATTGTTGACTATGCTTATTTACTTTATGG	25121	0	A_52_P96847	Smlr1	NM_001195596	ref|Mus musculus small leucine-rich protein 1 (Smlr1), mRNA [NM_001195596]	1.41458	0.175157	0.96994	0.17027	3.15269	3	0	0	0	1.46958	0.837942	0.000587	1.24078	1.59106	1.41189	0.592988	1.94477	0.000587	1.16647	0.876564	0.866786
4168	26611	DATA	28584	175	48	ref|NM_027514|ens|ENSMUST00000159413|ens|ENSMUST00000043517|gb|AJ563420	mm|chr7:20494614-20494555	0	NA	1153	CTAGGCTACATCTTTCTTATCGTCTTTGTCCTCGCTGTAGTCATCATCATCGCAGCACTA	26063	0	A_51_P237097	Pvr	NM_027514	ref|Mus musculus poliovirus receptor (Pvr), mRNA [NM_027514]	1.54103	0.153458	0.909335	0.136454	5.32812	3	0	0	0	1.65177	0.810278	0.000927	1.3775	1.56369	1.6819	0.000927	2.18407	0.000927	0.752798	1.00315	0.972055
4180	26686	DATA	30766	188	98	ref|NM_172653|ens|ENSMUST00000141226|ens|ENSMUST00000027131|ref|XM_006495935	mm|chr1:46876114-46876055	0	NA	1916	GTCCACGTGACCTCACATAACCACCATGATGAGGATAAAGCAGTGCTGAGGAAGCACAGC	27923	0	A_65_P05446	Slc39a10	NM_172653	ref|Mus musculus solute carrier family 39 (zinc transporter), member 10 (Slc39a10), mRNA [NM_172653]	1.4218	0.172734	1.02801	0.202782	2.56046	3	0	0	0	0.552557	1.93403	0.000473	1.27792	1.61337	1.3741	1.15159	1.01146	0.000473	1.14705	0.793872	1.14311
4187	26736	DATA	32213	197	69	ref|NM_013879|ens|ENSMUST00000145197|ens|ENSMUST00000112112|ens|ENSMUST00000031519	mm|chr5:115622828-115622769	0	NA	662	GACATAGAGGAAATTATCCGAGACGTGGACCTCAATGGAGATGGACGAGTGGACTTTGAA	29304	0	A_55_P1960894	Cabp1	NM_013879	ref|Mus musculus calcium binding protein 1 (Cabp1), mRNA [NM_013879]	1.79794	0.201121	0.993132	0.126299	5.86962	3	0	0	0	0.000348	1.17173	0.677894	1.7586	1.6194	2.01583	0.000348	0.470897	1.30556	1.05182	1.0794	0.848166
4197	26772	DATA	33554	205	98	ref|NM_146354|ens|ENSMUST00000098188|tc|NP646959|nap|NAP057835-1	mm|chr7:111095720-111095779	0	NA	638	CATTGTTGTCTCTTATGTGTTGATCCTGTACACGGTACTAAACATTACCTCTGGGGAGGG	30524	0	A_52_P240632	Olfr633	NM_146354	ref|Mus musculus olfactory receptor 633 (Olfr633), mRNA [NM_146354]	1.97777	0.571911	1.03452	0.170965	2.73699	2	0	0	0	1.14574	1.81306	0.00108404	2.57459	1.43455	1.92417	0.00108404	0.00108404	0.00108404	0.844286	1.08395	1.17532
4198	26780	DATA	33858	207	74	ref|NM_011580|ens|ENSMUST00000039559|ref|XM_006499152|gb|AK080686	mm|chr2:117950962-117951021	0	NA	3894	CGAATGAGAATGCATCTTCCAAGACCATGAAGAGTTCCTTGGGTTTGCTTTTGGGAAAGC	30771	0	A_65_P13588	Thbs1	NM_011580	ref|Mus musculus thrombospondin 1 (Thbs1), mRNA [NM_011580]	2.74441	1.36292	0.48152	0.159484	2.85629	2	0	0	0	0.00016	0.377312	0.838448	2.53675	1.49724	4.19924	0.754156	0.351971	0.00016	0.337166	0.652726	0.454668
4205	26857	DATA	36319	222	75	ref|NM_001242411|ref|NM_001081037|ens|ENSMUST00000081688|ens|ENSMUST00000162710	mm|chr10:121368485-121368426	0	NA	269	CAAGATTTCTTCCGGAAAAAAGCCGAAATTGAGACGGAATATTCTCGGAACCTGGAGAAG	32838	0	A_52_P454622	Srgap1	NM_001242411	ref|Mus musculus SLIT-ROBO Rho GTPase activating protein 1 (Srgap1), transcript variant 2, mRNA [NM_001242411]	1.98701	0.650534	0.776196	0.708239	2.1808	3	0	0	0	0.000647	1.66728	1.26636	1.68452	1.5428	2.73371	0.000647	0.774795	0.000647	1.38868	0.93926	0.000647
4214	26890	DATA	37658	230	102	ref|NM_144520|ens|ENSMUST00000003681|gb|BC005759|gb|AA096731	mm|chr11:3997333-3997274	0	NA	2237	CAATAAAAAGCTCTTGACCCCACACAACTTGAGAGCCAGGTTACAGGCTGCCCAGAATTC	34046	0	A_52_P488427	Sec14l2	NM_144520	ref|Mus musculus SEC14-like 2 (S. cerevisiae) (Sec14l2), mRNA [NM_144520]	1.78793	0.572396	1.11019	0.10441	2.01754	2	0	0	0	0.000861	0.867131	1.41556	1.44498	1.47009	2.44872	0.000861	1.02038	0.000861	1.22472	1.08553	1.02031
4215	26899	DATA	37921	232	37	ref|NM_001285427|ref|NM_001037099|ref|NM_146123|ref|NM_001285426	mm|chr2:52290023-52289964	0	NA	1904	CGACATAGGCTTTGAGGCTGCCGAAACAAACAAACAAACAAACAAACAAACATCATCTGT	34228	0	A_55_P2289707	Cacnb4	NM_001285427	ref|Mus musculus calcium channel, voltage-dependent, beta 4 subunit (Cacnb4), transcript variant 4, mRNA [NM_001285427]	1.47414	0.312936	0.84107	0.249024	2.74175	3	0	0	0	1.32989	1.44561	0.000447	1.8352	1.30607	1.28114	0.000447	0.81341	1.46459	1.07909	0.861784	0.582336
4216	26900	DATA	37924	232	40	ref|NM_026952|ens|ENSMUST00000003203|gb|AY072295|tc|TC1580366	mm|chr11:98107958-98108017	0	NA	4785	ATCTGTCTGTGATCTGCTGTTATTAGCAGACAAAGCTAATACACTCATATGTCTTGATTC	34233	0	A_55_P1999187	Cdk12	NM_026952	ref|Mus musculus cyclin-dependent kinase 12 (Cdk12), transcript variant 3, mRNA [NM_026952]	2.01271	0.48029	0.365528	0.631491	3.59598	3	0	0	0	1.55128	2.38076	0.000936	2.4939	1.53333	2.01089	0.000936	0.930454	0.000936	0.000936	1.09471	0.000936
4218	26935	DATA	39593	242	69	ref|NM_010061|ens|ENSMUST00000120009|ens|ENSMUST00000006136|ens|ENSMUST00000125961	mm|chr16:4039965-4040024	0	NA	1245	GTCTGCCACGGGGACTAAGAAATACTGTTTAATTGAAGTAAATAAAGCTGAGCTCAAGCA	35739	0	A_55_P1985835	Dnase1	NM_010061	ref|Mus musculus deoxyribonuclease I (Dnase1), mRNA [NM_010061]	1.3896	0.0153788	0.986863	0.228163	3.05038	2	0	0	0	2.01044	0.513257	0.000467	1.39583	1.37208	1.40089	1.27438	1.07159	0.000467	1.24208	0.915891	0.802621
4221	26972	DATA	41967	256	147	ref|NM_001162999|ens|ENSMUST00000154645|ens|ENSMUST00000076136|ens|ENSMUST00000149475	mm|chr3:79263644-79263585	0	NA	3343	CCTCTGCTGACGGCCATCGCCAGCACTCACTCTCCGTACGTGGCACAGATCCTCTTATAG	37924	0	A_66_P110779	Fnip2	NM_001162999	ref|Mus musculus folliculin interacting protein 2 (Fnip2), mRNA [NM_001162999]	2.0113	0.39159	0.918686	0.248501	4.08049	3	0	0	0	0.640757	0.000615	0.550853	2.46338	1.79295	1.77757	0.000615	1.08638	0.930817	0.753982	0.79755	1.20453
4228	27045	DATA	45007	275	71	gb|BC044848|tc|NP597360	mm|chr18:20743861-20743920	0	NA	3396	CAGTATGAGCTCTTAAATGTCCTATAAAGTAAGGAACAGTACATATTTCTCAAATTAAGC	40715	0	A_52_P96159	Dsg2	BC044848	gb|Mus musculus desmoglein 2, mRNA (cDNA clone IMAGE:5355674), complete cds. [BC044848]	1.62721	0.132414	0.737375	0.672779	2.24775	2	0	0	0	2.5939	1.21616	0.000928	1.58959	1.77437	1.51769	0.000928	1.09338	0.000928	0.000928	1.31976	0.891437
4230	27060	DATA	45693	279	101	ref|NM_027276|ens|ENSMUST00000134645|ens|ENSMUST00000129872|ens|ENSMUST00000043962	mm|chr8:13759229-13760988	0	NA	309	CTGGACAAATTGTATGAAGCTTGCCGATACCTTGCAGCTAGATGCCACTATGCTGCAAAA	41360	0	A_52_P275152	Cdc16	NM_027276	ref|Mus musculus CDC16 cell division cycle 16 (Cdc16), mRNA [NM_027276]	1.61656	0.117752	1.08538	0.0334222	7.51636	2	0	0	0	1.17606	1.71073	0.000628	1.48315	1.6605	1.70602	0.000628	1.00551	0.000628	1.04736	1.09863	1.11014
4234	27080	DATA	46608	285	32	gb|BG870168	mm|chr13:54605665-54605606	0	NA	93	CTGCCAAAGCTCTGGAGCCAGCTCGGGCCGGAGGCCACCGCCGGCCACCGCTTGGCAGCT	42121	0	A_66_P117318	BG870168	BG870168	gb|602793418F1 NCI_CGAP_SG2 Mus musculus cDNA clone IMAGE:4924372 5', mRNA sequence [BG870168]	2.2803	0.440185	0.646482	0.585164	3.86464	3	0	0	0	1.41857	0.765716	0.000456	2.59507	1.7773	2.46853	1.034	0.000456	0.000456	1.14097	0.798016	0.000456
4240	27116	DATA	47933	293	45	ref|NM_178337|ref|NR_130788|ens|ENSMUST00000162440|ens|ENSMUST00000162241	mm|chr13:14100910-14098774	0	NA	843	AAGTCTAACAATATTTCCATTTCTGAAAGGCCAGTGAATGTCCTGCAGAAAATGAGGTTA	43309	0	A_51_P351137	Tbce	NM_178337	ref|Mus musculus tubulin-specific chaperone E (Tbce), transcript variant 1, mRNA [NM_178337]	2.00989	1.33772	0.5838	0.217546	1.82253	2	0	0	0	0.596708	0.94197	0.000327	3.55189	1.16028	1.3175	1.37887	1.30073	0.000327	0.521165	0.825792	0.404442
4241	27118	DATA	47979	293	91	ref|NM_011409|ens|ENSMUST00000019130|gb|BC145134|gb|BC132627	mm|chr11:83028431-83028490	0	NA	1590	CCCAAAAATATTATCTGTCGGCCAAGGCAGTAAAGGACTTAGAAAAAGCTCTCGTTGAAA	43390	0	A_51_P228768	Slfn3	NM_011409	ref|Mus musculus schlafen 3 (Slfn3), mRNA [NM_011409]	1.77555	0.195379	1.15031	0.281728	3.15867	3	0	0	0	0.999575	0.706222	0.00045	1.54994	1.88825	1.88844	0.00045	0.969228	0.546507	0.931763	1.0509	1.46827
4247	27146	DATA	49224	301	24	ref|NM_009766|ens|ENSMUST00000033464|gb|AK038616|tc|TC1590328	mm|chrX:54301830-54301889	0	NA	2666	GCTTACTTAAAGTGGGGGTGCTAATATTGTATTAACATTGCTTAAAAGTGAGCAAAGTTG	44452	0	A_55_P2020731	Brs3	NM_009766	ref|Mus musculus bombesin-like receptor 3 (Brs3), mRNA [NM_009766]	2.12423	0.0273438	0.9974	0.863777	2.25839	2	0	0	0	0.641268	0.663271	0.00048	2.12743	2.09542	2.14983	0.00048	1.32914	0.00048	1.46896	1.52276	0.00048
4254	27210	DATA	52409	320	93	gb|AK037263|tc|TC1615606|riken|A130001L21|nap|NAP079482-1	mm|chr13:99037406-99037465	0	NA	1620	CTACCACACCTCTGTTAGCAAATTGTAAGTATGCCTTAGAATGTATCAAAATACTGTGTA	47218	0	A_55_P2730018	Ankra2	AK037263	gb|Mus musculus 16 days neonate thymus cDNA, RIKEN full-length enriched library, clone:A130001L21 product:ankyrin repeat, family A (RFXANK-like), 2, full insert sequence. [AK037263]	1.63076	0.286684	1.17142	0.128618	2.53199	2	0	0	0	1.44814	0.875959	0.000696	1.29974	1.79888	1.79366	0.000696	1.26727	0.000696	1.28176	1.20234	1.03016
4255	27215	DATA	52584	321	104	ens|ENSMUST00000183322|nap|NAP063301-1	mm|chr9:93286241-93286206	0	NA	360	CATCATCTTGGCCCCTTCTATTGAGTTTGTGAGAGTTGTGAACCATGAAAAATATGACAA	47528	0	A_66_P106951	ENSMUST00000183322	ENSMUST00000183322	ens|predicted gene 9621 [Source:MGI Symbol;Acc:MGI:3780029] [ENSMUST00000183322]	2.06532	0.844525	0.303634	0.524418	3.06943	3	0	0	0	0.000862	1.17471	2.10816	2.76158	1.12588	2.30849	1.60769	0.000862	0.000862	0.90918	0.000862	0.000862
4261	27284	DATA	56390	344	138	ref|NM_147113|tc|NP646535|nap|NAP021335-001	mm|chr7:109901705-109901646	0	NA	736	ATATCGGGGCTGTAGCTATATTCTATATTCCATTGATCAGTTTGTCCTTTGTTCACAGAT	50838	0	A_55_P2046463	Olfr560	NM_147113	ref|Mus musculus olfactory receptor 560 (Olfr560), mRNA [NM_147113]	1.8098	0.423679	1.03792	0.14805	2.97889	2	0	0	0	0.000942	1.05228	0.994355	1.35087	2.18604	1.89248	0.000942	1.40739	0.000942	1.18368	1.04239	0.887682
4262	27291	DATA	56773	347	29	ens|ENSMUST00000200581|gb|AK046854|tc|TC1617546|riken|B830031E22	mm|chr5:103972299-103972358	0	NA	2754	GCAAGTCAAGGAAAACAGTACTGCCTTAATGTTTCGTTGATCTTTGTGAATTTTTTCAGG	51233	0	A_55_P2731411	Ptpn13	ENSMUST00000200581	ens|protein tyrosine phosphatase, non-receptor type 13 [Source:MGI Symbol;Acc:MGI:103293] [ENSMUST00000200581]	2.24498	0.157056	0.54842	0.947217	3.06049	2	0	0	0	1.46987	2.14375	0.00154412	2.37794	2.07169	2.2853	0.00154412	0.00154412	0.00154412	0.00154412	0.00154412	1.64217
4263	27299	DATA	57285	350	49	ref|NM_001301372|ref|NM_001271716|ref|NM_008560|ref|NM_001271717	mm|chr18:68569521-68569462	0	NA	303	TATTGGAAAAGTTCTCAGCACCACAAATGATTCTGCTGCTTCCAAGGCCCTTCTAAGCCA	51573	0	A_55_P2741392	Mc2r	NM_001301372	ref|Mus musculus melanocortin 2 receptor (Mc2r), transcript variant 4, mRNA [NM_001301372]	2.3469	0.342516	0.00206044	0	11.8575	2	0	0	0	3.17479	1.77009	0.00206044	2.39166	2.66484	1.9842	0.00206044	0.00206044	0.00206044	0.00206044	0.00206044	0.00206044
4265	27310	DATA	57733	353	5	ref|NM_001287386|ens|ENSMUST00000109822|ens|ENSMUST00000109823|ref|XM_006514443	mm|chr11:5815066-5815007	0	NA	72	CTCGGGAGTCAGGAACATCTCTACTTCCCCAACGACCCCTGCTTATCCTCAGATGGCTGT	52068	0	A_52_P66580	Gck	NM_001287386	ref|Mus musculus glucokinase (Gck), transcript variant 2, mRNA [NM_001287386]	1.76144	0.479602	0.649317	0.563274	2.60376	3	0	0	0	1.13826	1.12002	0.000811	1.24837	2.1985	1.83743	0.953439	1.55439	0.000811	0.000811	0.930471	1.01667
4267	27339	DATA	59631	364	99	ens|ENSMUST00000182382|gb|AK039987|tc|TC1717552|riken|A430040A19	mm|chr17:74965661-74965720	0	NA	2275	ATGAAATTCAGAAGTTTTCATTCAGATTACCACACACTAGTTGGATCTGATAGTTGGAAC	53703	0	A_52_P386932	Birc6	ENSMUST00000182382	ens|baculoviral IAP repeat-containing 6 [Source:MGI Symbol;Acc:MGI:1276108] [ENSMUST00000182382]	1.6299	0.424675	0.8014	0.693069	1.76545	3	0	0	0	1.8935	1.6979	0.00122888	2.11623	1.44117	1.33231	0.00122888	1.11101	0.00122888	0.00122888	1.18966	1.21331
4269	27353	DATA	61047	373	39	ref|NM_172161|ref|NM_001113553|ens|ENSMUST00000113024|ens|ENSMUST00000089023	mm|chr6:113643695-113643754	0	NA	1870	AAGCCAAAAGGAGACTGATGGAGAACATCGTACTCTACAAAGAAGAGAGACTGGACAGCA	55056	0	A_55_P2082974	Irak2	NM_172161	ref|Mus musculus interleukin-1 receptor-associated kinase 2 (Irak2), transcript variant 1, mRNA [NM_172161]	2.40264	0.710732	0.633367	0.557023	3.39365	3	0	0	0	0.000883	2.09814	0.79029	1.74606	3.15733	2.30454	0.000883	0.000883	0.000883	0.000883	1.05084	0.848382
4274	27382	DATA	62656	383	8	ref|NM_010778|ens|ENSMUST00000162951|ens|ENSMUST00000159563|ens|ENSMUST00000161772	mm|chr1:196888552-196868154	0	NA	1093	GAAAACAAATGTATCTGCAGCAAGATGAAAATCTCATGTGTGGAAGTCATTACTGTTCCA	56473	0	A_55_P2489495	Cd46	NM_010778	ref|Mus musculus CD46 antigen, complement regulatory protein (Cd46), mRNA [NM_010778]	2.02148	1.18316	0.827858	0.240772	1.71228	2	0	0	0	0.744593	0.471653	0.000468	3.3292	1.02518	1.71007	1.09757	0.74069	0.396999	1.01035	0.918253	0.554971
4277	27398	DATA	2177	14	45	ref|NM_008611|ens|ENSMUST00000018765|gb|AK170760|gb|AK170388	mm|chr9:7567968-7568026	0	NA	1934	TCCGTTGGAAAAATATGAAAAATATGTAATGTGTGTTGAATCATGCCCCTCTGCATGCCG	1987	0	A_55_P2831118	Mmp8	NM_008611	ref|Mus musculus matrix metallopeptidase 8 (Mmp8), mRNA [NM_008611]	1.99232	0.433133	1.22671	0.383366	2.29256	3	0	0	0	0.989169	0.000699	0.000699	1.83445	1.66027	2.48224	0.000699	1.35093	0.000699	0.800307	1.54288	1.33695
4280	27425	DATA	6601	41	41	ref|NM_028875|ens|ENSMUST00000021715|ens|ENSMUST00000127281|ref|XM_006516299	mm|chr12:113041463-113041404	0	NA	2362	AGCTCTGCAGAACTGGAGGGCTTTAGACCCGGAAATAAAACTTTATTTTTGTAACAAAGT	6253	0	A_55_P2152049	Xrcc3	NM_028875	ref|Mus musculus X-ray repair complementing defective repair in Chinese hamster cells 3 (Xrcc3), mRNA [NM_028875]	2.10604	0.741095	1.13315	0.128526	2.24034	2	0	0	0	0.00074	0.00074	1.06021	1.25315	2.47208	2.5929	0.00074	1.21924	0.00074	1.21493	0.985011	1.19952
4283	27433	DATA	8721	54	29	gb|DV659458|tc|TC1608315	mm|chr12:32252475-32252416	0	NA	623	GTTCTCTTGCTGCGGATTGTAACTCAGTAAAATAAAACTCTAGAGGCTTGTGATTTATCA	8014	0	A_55_P2076253	DV659458	DV659458	gb|DS178B_H12 Eppig [DV659458]	1.89199	0.204842	1.26773	0.254803	3.30725	3	0	0	0	0.00108441	1.2313	0.00108441	1.82903	1.72601	2.12092	0.00108441	1.2852	0.00108441	1.44091	1.38714	0.975153
4285	27442	DATA	9942	61	102	ref|NM_007662|ens|ENSMUST00000034443|gb|BC157978|gb|M74541	mm|chr8:125391031-125391090	0	NA	2576	GGCCCATCCTTGGCTCCATGGCAGATAAACTCAAGGAGGTCATCTCTGTGAGGTCCAAGA	9308	0	A_51_P481930	Cdh15	NM_007662	ref|Mus musculus cadherin 15 (Cdh15), mRNA [NM_007662]	3.00827	0.858449	0.00169559	1.43e-10	6.06621	2	0	0	0	0.00169559	2.96164	0.00169559	2.95033	2.18025	3.89421	0.00169559	0.00169559	0.00169559	0.00169559	0.00169559	0.00169559
4286	27453	DATA	11483	71	3	ref|NM_205820|ens|ENSMUST00000040065|gb|AK155696|gb|BC117913	mm|chrX:103354821-103354880	0	NA	3002	TACCACCGACTCAGGAAACTCATAAACAAACAGACGTTTATCACTTGGCCGGACAGTGTT	10631	0	A_66_P125902	Tlr13	NM_205820	ref|Mus musculus toll-like receptor 13 (Tlr13), mRNA [NM_205820]	2.57157	1.32377	0.952374	0.824706	1.79818	3	0	0	0	0.00137466	1.42129	0.00137466	1.66563	1.95832	4.09077	0.00137466	0.00137466	0.00137466	0.00137466	1.47077	1.38497
4287	27457	DATA	12205	75	69	ref|NM_054088|ens|ENSMUST00000045289|gb|AY037763|tc|TC1582216	mm|chr15:84019823-84019882	0	NA	4520	GCAAACTAGTGGAACAGCAGAAGGATTGAATGGATACACCAAAAATAACCACAACTGTTT	11348	0	A_51_P389265	Pnpla3	NM_054088	ref|Mus musculus patatin-like phospholipase domain containing 3 (Pnpla3), mRNA [NM_054088]	2.61658	1.92855	0.481737	0.832053	1.76047	2	0	0	0	2.6983	0.0013514	0.0013514	1.44735	1.55986	4.84252	0.0013514	0.0013514	0.0013514	1.44251	0.0013514	0.0013514
4288	27465	DATA	12958	80	2	ref|NM_021358|ens|ENSMUST00000068036|ens|ENSMUST00000105802|gb|AF134158	mm|chr4:138617742-138617683	0	NA	943	GTCCTCACATGGCTGGGATACTGTAATAGCACCATGAACCCTATCATCTATCCCCTCTTC	11822	0	A_51_P183497	Htr6	NM_021358	ref|Mus musculus 5-hydroxytryptamine (serotonin) receptor 6 (Htr6), mRNA [NM_021358]	2.76725	0.783815	0.615345	1.06225	2.82338	3	0	0	0	1.84192	0.00205629	0.00205629	2.59093	2.08662	3.62421	0.00205629	0.00205629	0.00205629	0.00205629	0.00205629	1.84192
4294	27478	DATA	15625	96	45	ref|NM_001081225|ens|ENSMUST00000096053|ref|XM_006527000|ref|XM_006527002	mm|chr19:45033523-45035235	0	NA	2626	TGTCGGTGCAGATTGTAAGTACATTGATGGAAATAACCATTAGAAATGATACTTTCAGTG	14266	0	A_52_P465714	Fam178a	NM_001081225	ref|Mus musculus family with sequence similarity 178, member A (Fam178a), mRNA [NM_001081225]	2.07663	0.441014	0.421376	0.727761	3.36913	3	0	0	0	0.00120336	1.35589	0.00120336	2.51452	1.63256	2.08281	0.00120336	3.14528	0.00120336	0.00120336	0.00120336	1.26172
4300	27522	DATA	25750	158	2	ref|NM_133245|gb|BC110627|gb|AK011084|gb|AK028172	unmapped	0	NA	177	TGGTGATTGTGGTTCATGACTGGGTGAACTTGTACACCAACTATTACAAGAAGCTCGTGC	23339	0	A_52_P534583	Ahsp	NM_133245	ref|Mus musculus alpha hemoglobin stabilizing protein (Ahsp), mRNA [NM_133245]	2.80462	1.2418	0.206252	0.356411	3.48355	2	0	0	0	0.000478	0.000478	1.9639	3.07167	1.45102	3.89116	0.444306	0.557752	0.000478	0.000478	0.617799	0.000478
4303	27546	DATA	28827	176	127	ref|NM_001111023|ref|NM_009821|ref|NM_001111021|ref|NM_001111022	mm|chr16:92605844-92605785	0	NA	2987	CAGGAGGGCCCTTGGAGGCCACCAGGAAGAATCCCGGAGGGAAACTGTGAATGCTTCTGA	26207	0	A_55_P2183438	Runx1	NM_001111023	ref|Mus musculus runt related transcription factor 1 (Runx1), transcript variant 3, mRNA [NM_001111023]	2.08015	0.288979	1.09533	0.214272	4.74145	3	0	0	0	1.44875	0.000763	0.000763	2.28687	1.74994	2.20363	0.000763	1.02175	0.000763	1.32675	0.903819	1.05543
4305	27563	DATA	31443	192	119	ref|NM_018803|ens|ENSMUST00000029441|ref|XM_011245696|ref|XM_006521175	mm|chr15:89621347-89621288	0	NA	1316	GTGAGGGCCGAAGACTTAAAAAACGGAAAACAACTACAAAGAAAAATACTCTCAATCCCG	28517	0	A_52_P77155	Syt10	NM_018803	ref|Mus musculus synaptotagmin X (Syt10), mRNA [NM_018803]	2.82393	0.623504	0.00262548	0	7.83739	2	0	0	0	3.50721	0.00262548	0.00262548	2.9482	3.37594	2.14765	0.00262548	0.00262548	0.00262548	0.00262548	0.00262548	0.00262548
4307	27567	DATA	31897	195	81	ens|ENSMUST00000162274|tc|TC1763164	mm|chr15:99231952-99232011	0	NA	436	TTTTGTCTTTTGCTCTCGCGTGTCCTCGTGTCTATAAATGAGCTTTTCTGTGTTCCCAGC	29029	0	A_55_P2720258	Tmbim6	ENSMUST00000162274	ens|transmembrane BAX inhibitor motif containing 6 [Source:MGI Symbol;Acc:MGI:99682] [ENSMUST00000162274]	3.00345	4.1974	0.347849	0.0483233	1.09576	2	0	0	0	0.000307	0.496098	0.000307	0.571691	7.85018	0.588475	0.000307	0.556316	0.892771	0.364488	0.385654	0.293405
4309	27588	DATA	33997	208	49	ref|NM_146453|ens|ENSMUST00000057817|gb|BC130248|tc|NP830914	mm|chr7:113821860-113821801	0	NA	139	CTGGTCATCACAATGGATATTTACCTCCATGTTCCCATGTACCTCTTGCTTGAGCAGCTA	30732	0	A_51_P289976	Olfr693	NM_146453	ref|Mus musculus olfactory receptor 693 (Olfr693), mRNA [NM_146453]	2.53724	1.05743	0.369173	0.637026	3.04193	3	0	0	0	0.00138584	1.83393	0.00138584	1.79235	2.07183	3.74755	0.00138584	1.44128	0.00138584	1.10475	0.00138584	0.00138584
4316	27616	DATA	37831	231	111	ref|NM_008670|ens|ENSMUST00000022142|ens|ENSMUST00000118082|ref|XM_006517550	mm|chr13:101196821-101196762	0	NA	1901	TAGAGATCAAAGAGTTTCCCTTGTCCAATACTGTCTCTATATTAAAGAAGTTCTTCTCCC	34358	0	A_55_P1979092	Naip1	NM_008670	ref|Mus musculus NLR family, apoptosis inhibitory protein 1 (Naip1), mRNA [NM_008670]	2.7793	1.0209	0.00212368	0	4.71172	2	0	0	0	0.00212368	0.00212368	1.7915	2.4309	3.9288	1.9782	1.85574	0.00212368	0.00212368	0.00212368	0.00212368	0.00212368
4323	27638	DATA	43210	264	78	gb|CF583964	unmapped	0	NA	974	ACACTTTTCTTCGGGCGCCACCCTGGCACCTTAATTGGGAAACTCGGGTCCAAAAGCAGC	38970	0	A_55_P2197953	2010004M13Rik	CF583964	gb|AGENCOURT_8806276_updated NIH_MGC_137 Mus musculus cDNA clone IMAGE:6431658 3', mRNA sequence [CF583964]	2.41445	0.578954	0.507251	0.876131	3.14565	3	0	0	0	0.00141679	2.07206	0.00141679	1.78516	2.5337	2.9245	0.00141679	1.15717	0.00141679	0.00141679	1.51892	0.00141679
4324	27650	DATA	44003	269	51	ens|ENSMUST00000146636|tc|TC1729874|nap|NAP015818-001	mm|chrX:162920667-162920608	0	NA	882	ATTCCCTACATCCCTCCTGAAGGAAAGATGGATCTTCTGACAACTGTGCAAGCCAACTAT	39804	0	A_66_P127263	ENSMUST00000146636	ENSMUST00000146636	ens|predicted gene 15229 [Source:MGI Symbol;Acc:MGI:3644786] [ENSMUST00000146636]	3.2918	1.141	0.00169673	0	4.99441	2	0	0	0	0.00169673	2.11102	0.00169673	2.02236	4.23193	3.62111	0.00169673	0.00169673	0.00169673	0.00169673	0.00169673	0.00169673
4325	27658	DATA	45035	275	99	ens|ENSMUST00000097520|gb|BC147247|gb|BC147248|gb|AK158289	mm|chr18:77424247-77424188	0	NA	749	ACCGCAGAGGCAACCTCATCGAGACGAGCATTTGCATGCGGTACGCAGGTCATTGAGTCA	40763	0	A_55_P2135296	ENSMUST00000097520	ENSMUST00000097520	ens|predicted gene 7276 [Source:MGI Symbol;Acc:MGI:3646549] [ENSMUST00000097520]	1.99718	0.303246	0.553665	0.955436	2.49424	2	0	0	0	0.00204315	2.0944	0.00204315	1.6953	1.99445	2.30178	0.00204315	2.24491	0.00204315	0.00204315	1.65691	0.00204315
4326	27668	DATA	46776	286	36	ens|ENSMUST00000189152|tc|TC1712712	mm|chr1:95652022-95664677	0	NA	283	TAACCTGTGTAGCCACTTTGACATATGATACTCTCCGGTTTGCTGAATTTGAAGATTTCC	42129	0	A_55_P2718222	Atg4b	ENSMUST00000189152	ens|autophagy related 4B, cysteine peptidase [Source:MGI Symbol;Acc:MGI:1913865] [ENSMUST00000189152]	2.63905	0.710389	0.00172018	0	6.43026	2	0	0	0	0.00172018	0.00172018	1.67116	3.45757	2.1832	2.27638	0.00172018	2.39966	0.00172018	0.00172018	0.00172018	0.00172018
4327	27680	DATA	48473	296	93	ref|XM_011247086|ref|XM_006526505|ref|XM_011247087|ref|XM_011247088	mm|chr18:85150753-85150812	0	NA	1675	GTTTGGGAGGCAATAAATGCTGAGTTAGCAGTAGGGAGTCTTGTTATTAGTAAGCTGTTT	43683	0	A_51_P183891	Fbxo15	XM_011247086	ref|PREDICTED: Mus musculus F-box protein 15 (Fbxo15), transcript variant X1, mRNA [XM_011247086]	2.40098	0.261151	0.00144131	0	15.9146	2	0	0	0	0.00144131	2.88743	0.00144131	2.3109	2.1968	2.69525	0.00144131	1.89953	0.00144131	0.00144131	0.00144131	0.00144131
4328	27686	DATA	49621	303	93	ref|NM_001163996|ens|ENSMUST00000086686|ens|ENSMUST00000112528|ref|XM_006535187	mm|chr5:110556745-110556804	0	NA	1089	TTTGCACAAAAGTCCCAGCTTGCTATCCACCAAAAGACTCACTCAGGAGAAGAACCAGAA	44867	0	A_55_P2174868	Zfp605	NM_001163996	ref|Mus musculus zinc finger protein 605 (Zfp605), mRNA [NM_001163996]	1.95534	0.326113	0.86509	0.783191	2.22587	2	0	0	0	0.00121891	1.96651	0.00121891	1.68108	1.869	2.31594	0.00121891	1.56732	0.00121891	1.06533	1.52872	0.00121891
4331	27700	DATA	51593	315	97	gb|AK033996|gb|BB077360|tc|TC1614253|riken|9330137F11	mm|chr18:78108191-78108250	0	NA	837	CTCTGTAGAACAGAGGTCTTTAAAGTAGAAACACGGGACTAGGCATGGCCACACATGCCT	46636	0	A_66_P139030	Pstpip2	AK033996	gb|Mus musculus adult male diencephalon cDNA, RIKEN full-length enriched library, clone:9330137F11 product:proline-serine-threonine phosphatase-interacting protein 2, full insert sequence. [AK033996]	3.2041	0.764181	0.00252689	0	7.25651	2	0	0	0	2.36749	0.00252689	0.00252689	3.79139	3.48079	2.34011	0.00252689	0.00252689	0.00252689	0.00252689	0.00252689	0.00252689
4332	27702	DATA	52744	322	100	gb|AK017006|tc|TC1600325|riken|4933431J24|nap|NAP073643-1	mm|chr14:118612250-118612309	0	NA	885	GCAAGGCAAGAGGAATCCAGGTCATTTGTTGAATATTTTAAACTTCCAGAAAATGACTTT	47526	0	A_55_P2110577	4933431J24Rik	AK017006	gb|Mus musculus adult male testis cDNA, RIKEN full-length enriched library, clone:4933431J24 product:unclassifiable, full insert sequence. [AK017006]	2.99413	0.896029	0.00261078	2.85e-10	5.78269	2	0	0	0	2.99674	0.00261078	0.00261078	2.84509	3.95533	2.18196	0.00261078	0.00261078	0.00261078	0.00261078	0.00261078	0.00261078
4336	27716	DATA	57123	349	51	ref|NM_001159275|ens|ENSMUST00000058635|gb|AK077159|gb|AY583456	mm|chr18:37797177-37797118	0	NA	1200	TATATCATATGGTTTCTTCCTGCAATCCTACTGAAATAGGAAAATCACTAGTTTTGCTGG	51576	0	A_51_P285279	Slc25a2	NM_001159275	ref|Mus musculus solute carrier family 25 (mitochondrial carrier, ornithine transporter) member 2 (Slc25a2), mRNA [NM_001159275]	2.44557	0.603735	0.705148	0.610043	3.51226	3	0	0	0	1.53613	0.000997	0.000997	2.16338	2.03461	3.13873	1.00771	0.000997	0.000997	1.07396	0.000997	1.04048
4337	27720	DATA	58736	359	24	ref|NM_027617|ens|ENSMUST00000197980|ens|ENSMUST00000029839|ref|XM_006502090	mm|chr3:146132602-146131123	0	NA	1346	TCTCAGATTCTAAGAATTATCTTATAATCCAGATTACTGAAGTACAGCACGCAATTGACC	53000	0	A_65_P09470	Spata1	NM_027617	ref|Mus musculus spermatogenesis associated 1 (Spata1), mRNA [NM_027617]	2.72606	3.22377	0.65019	0.0689613	1.11506	2	0	0	0	0.00044	0.611296	0.00044	0.881169	6.44851	0.848512	1.25818	0.00044	0.00044	0.729812	0.609461	0.611296
4339	27737	DATA	62519	382	35	gb|AK051509|gb|AK053727|tc|TC1589937|riken|E130303A03	mm|chr11:85127276-85127335	0	NA	2414	TTAAATGTGTTTTTATACATGCACATACTTCAAAAGCTTCAAAAGACATTTGTATTTTTA	56230	0	A_52_P521178	Ppm1d	AK051509	gb|Mus musculus 12 days embryo spinal ganglion cDNA, RIKEN full-length enriched library, clone:D130053L12 product:protein phosphatase 1D magnesium-dependent, delta isoform, full insert sequence. [AK051509]	2.56333	0.253933	1.11572	0.160293	8.34963	3	0	0	0	0.958029	0.000963	0.000963	2.33649	2.51585	2.83765	0.000963	0.000963	0.000963	1.13217	1.26715	0.947837
4342	27749	DATA	4466	28	38	gb|AK154875|riken|F630110G08	mm|chr12:112663028-112663087	0	NA	2769	GGGAGTGGAATGTGTCAACAGAAGAAGTTCAGAACTCTAATAATGACTTTAGACTTTTTC	4109	0	A_55_P2736660	Exoc3l4	AK154875	gb|Mus musculus NOD-derived CD11c +ve dendritic cells cDNA, RIKEN full-length enriched library, clone:F630110G08 product:hypothetical protein, full insert sequence. [AK154875]	3.35484	0.630062	0.00191949	0	9.21723	2	0	0	0	0.00191949	0.00191949	0.00191949	2.74167	4.00053	3.32231	0.00191949	1.92013	0.00191949	0.00191949	0.00191949	0.00191949
4343	27759	DATA	8198	50	162	gb|AK031234|riken|5930434O18|nap|NAP116505-1	mm|chr4:126726585-126726644	0	NA	1912	TGGTCATTTCCTTTTAACAGCAAGCACTGTTTTCCAAGAAATAAAATGTTCTCAATGACG	7656	0	A_55_P2729383	Sfpq	AK031234	gb|Mus musculus 13 days embryo forelimb cDNA, RIKEN full-length enriched library, clone:5930434O18 product:hypothetical protein, full insert sequence. [AK031234]	2.43654	0.396814	1.56197	0.480447	2.43094	3	0	0	0	0.000746	0.000746	0.000746	2.85455	2.39003	2.06502	0.000746	0.000746	0.000746	1.92551	1.01729	1.74312
4344	27764	DATA	13111	80	155	gb|BB048926	mm|chr9:61989752-61989693	0	NA	567	CTTACTCCTCTGGAACCATAGGCCAAACAAACCCTTCCATCTCTAAGCTGCTTTGGTTAT	12096	0	A_66_P122316	BB048926	BB048926	gb|BB048926 RIKEN full-length enriched, adult male olfactory bulb Mus musculus cDNA clone 6430598E18 3'. [BB048926]	1.2794	0.181438	2.21325	0.462924	3.25309	2	0	0	0	0.00110127	0.00110127	0.00110127	1.45001	1.29941	1.08879	0.00110127	1.51654	0.00110127	1.9364	2.74767	1.95567
4347	27776	DATA	26533	162	129	gb|AK052083|gb|BB524178|tc|TC1617629|riken|D230044I06	mm|chr16:34227748-34227689	0	NA	1313	AACCATACTGCAGGAGGAAGAGATTGTTTTTAACAGGCAGAGTAGTGAAGTGTGAACAAA	24147	0	A_66_P102017	Kalrn	AK052083	gb|Mus musculus 12 days embryo eyeball cDNA, RIKEN full-length enriched library, clone:D230044I06 product:unclassifiable, full insert sequence. [AK052083]	3.99252	0.189584	0.0024923	0	36.4531	2	0	0	0	0.0024923	0.0024923	0.0024923	3.91914	3.8506	4.20783	0.0024923	0.0024923	0.0024923	0.0024923	0.0024923	0.0024923
4350	27781	DATA	31162	191	2	ref|NM_010460|ens|ENSMUST00000049352|gb|X06762|gb|BB050719	mm|chr11:96151412-96151471	0	NA	1203	GGTCCTATTCACGAGCCTCTTTTTGTATATCTGAAGGATGGAAAATAAAACAGGATTAAA	28318	0	A_55_P2803022	Hoxb7	NM_010460	ref|Mus musculus homeobox B7 (Hoxb7), mRNA [NM_010460]	2.34885	0.637032	0.641437	1.10762	2.31448	3	0	0	0	0.00195114	0.00195114	0.00195114	3.08443	1.97992	1.9822	0.00195114	3.01939	0.00195114	1.92041	0.00195114	0.00195114
4355	27792	DATA	38917	238	49	ref|NM_001081239|ens|ENSMUST00000117550|ref|XM_006539763|ref|XM_006539764	mm|chr7:4194933-4194992	0	NA	1976	GGAACCTGAACATTCTATGGAAAGAAGAGATACTATTGTCTTCCTGAGTTAAAATTTGAC	35122	0	A_55_P1991560	Lilra5	NM_001081239	ref|Mus musculus leukocyte immunoglobulin-like receptor, subfamily A (with TM domain), member 5 (Lilra5), mRNA [NM_001081239]	3.9891	0.960695	0.00363389	2.85e-10	7.18545	2	0	0	0	0.00363389	0.00363389	0.00363389	2.88107	4.49693	4.5893	0.00363389	0.00363389	0.00363389	0.00363389	0.00363389	0.00363389
4356	27794	DATA	39458	241	98	gb|AK156054|gb|AK157346|gb|AK156175|gb|BY764854	mm|chr9:58093365-58093306	0	NA	4100	TTTTTTGAGCATGATAATGCAGTTCTCCATCTTAATAGAGGAGATGATTGACACCACCTC	35788	0	A_65_P16145	Pml	AK156054	gb|Mus musculus activated spleen cDNA, RIKEN full-length enriched library, clone:F830006B16 product:promyelocytic leukemia, full insert sequence. [AK156054]	3.673	3.79728	0.324861	0.560823	1.5108	2	0	0	0	0.0010696	0.0010696	0.0010696	8.02956	1.92439	1.06505	0.0010696	0.0010696	0.0010696	0.0010696	0.972443	0.0010696
4364	27814	DATA	47553	290	157	ens|ENSMUST00000049836|ref|XM_006533657|gb|BU523970|tc|TC1644694	mm|chr11:61952563-61952622	0	NA	3496	ATGTGTATATATATATATATGTATGTGAAGACCTGTATCTGACTCAGCAAACCCATCAGG	42925	0	A_52_P564962	Specc1	ENSMUST00000049836	ens|sperm antigen with calponin homology and coiled-coil domains 1 [Source:MGI Symbol;Acc:MGI:2442356] [ENSMUST00000049836]	3.99305	1.20238	0.00231705	0	5.74874	2	0	0	0	0.00231705	0.00231705	0.00231705	3.67832	2.97934	5.32149	0.00231705	0.00231705	0.00231705	0.00231705	0.00231705	0.00231705
4365	27817	DATA	47813	292	89	ens|ENSMUST00000132301|gb|AK077263|tc|TC1594379|riken|5031433E12	mm|chr6:81893748-81893807	0	NA	1963	CCTTGGAAAAAACCTTGAGAAACAAAACGTACTTGCCAGTTAGTGAAAGTACAGACACCC	43098	0	A_52_P27849	Gcfc2	ENSMUST00000132301	ens|GC-rich sequence DNA binding factor 2 [Source:MGI Symbol;Acc:MGI:2141656] [ENSMUST00000132301]	3.98943	1.42824	0.00352337	2.85e-10	4.83377	2	0	0	0	0.00352337	0.00352337	0.00352337	3.01248	5.62858	3.32723	0.00352337	0.00352337	0.00352337	0.00352337	0.00352337	0.00352337
4366	27819	DATA	48771	298	63	ens|ENSMUST00000097896|gb|AK133427|gb|AV282909|tc|TC1589720	mm|chr4:123538203-123538262	0	NA	1281	AAGTTATAAAGACATAATTCCCACAGGCAGATCAAGCTATTAAAACCCTGTTTTTCTGCT	43928	0	A_66_P104281	ENSMUST00000097896	ENSMUST00000097896	ens|Riken cDNA 4933427I04 gene [Source:MGI Symbol;Acc:MGI:3613760] [ENSMUST00000097896]	3.34147	0.431806	0.654488	1.13011	3.84693	2	0	0	0	0.00202037	0.00202037	0.00202037	3.12484	3.06086	3.83871	0.00202037	0.00202037	0.00202037	0.00202037	0.00202037	1.95942
4367	27820	DATA	49988	305	132	ens|ENSMUST00000142379	mm|chr4:149944545-149944604	0	NA	319	TTTCACTGGTGATTTTAAGATATCAGAGTGACATATTGTGCTTATCCTTCTGAGGAACGC	45232	0	A_55_P2714847	Rere	ENSMUST00000142379	ens|arginine glutamic acid dipeptide (RE) repeats [Source:MGI Symbol;Acc:MGI:2683486] [ENSMUST00000142379]	3.99164	1.52253	0.00278632	2.85e-10	4.53777	2	0	0	0	0.00278632	0.00278632	0.00278632	3.80101	5.60051	2.5734	0.00278632	0.00278632	0.00278632	0.00278632	0.00278632	0.00278632
4369	27823	DATA	51609	315	113	gb|BC057651|gb|BC040515|tc|TC1602374	mm|chr13:58688085-58688026	0	NA	1688	AGGATCTGGTGTGTGATATAAAGGACATGGGAGCTCTAAAGTCAAAATCTGGGGCAGGAT	46665	0	A_55_P2217876	BC057651	BC057651	gb|Mus musculus cDNA clone IMAGE:2864841, **** WARNING: chimeric clone ****. [BC057651]	3.99444	2.93129	0.00185257	0	2.35915	2	0	0	0	0.00185257	0.00185257	0.00185257	3.07217	7.27595	1.6352	0.00185257	0.00185257	0.00185257	0.00185257	0.00185257	0.00185257
4372	27828	DATA	54602	333	154	ref|NM_001289925|ref|NM_018781|ref|NM_001289927|ref|XM_006518519	mm|chr14:70482361-70482420	0	NA	3865	GGGCTTTAAATCTCATTTTATTTCTTGTTTTCATGGTATAAAGTTTTGGTTTGGCCTGGG	49400	0	A_55_P2787986	Egr3	NM_001289925	ref|Mus musculus early growth response 3 (Egr3), transcript variant 2, mRNA [NM_001289925]	3.78297	1.51139	0.130439	0.225479	4.13998	2	0	0	0	0.000258	0.000258	0.000258	4.49366	2.04723	4.80803	0.000258	0.258466	0.000258	0.000258	0.3908	0.000258
4374	27834	DATA	62218	380	62	gb|AK032118|riken|6330597K07|nap|NAP075030-1	mm|chr18:61648642-61648701	0	NA	2758	ATGTCCAATGAAGTCAAGACATGAAACTAGTTCTTTAGAGAAGATGCTCCAGCAGGAGGA	55983	0	A_66_P108699	AK032118	AK032118	gb|Mus musculus adult male medulla oblongata cDNA, RIKEN full-length enriched library, clone:6330597K07 product:unclassifiable, full insert sequence. [AK032118]	3.42683	2.04638	0.31021	0.269855	2.61527	2	0	0	0	0.000439	0.000439	0.000439	5.30128	1.24362	3.73561	0.786674	0.000439	0.000439	0.494303	0.000439	0.435888
4375	27838	DATA	62739	383	91	ref|NM_146939|ens|ENSMUST00000068475|gb|BC119279|gb|BC119283	mm|chr2:36762657-36762716	0	NA	189	TTCTTCTTAGCAAATCTCTCCTTAACTGATGCCTGTTTCACTTCTGCATCAGTACCCAAA	56619	0	A_51_P374335	Olfr354	NM_146939	ref|Mus musculus olfactory receptor 354 (Olfr354), mRNA [NM_146939]	3.20144	1.28558	0.797842	0.696339	2.84748	3	0	0	0	0.000357	0.000357	0.000357	4.57942	2.99057	2.03434	0.000357	0.000357	0.000357	1.28547	1.1077	0.000357
4580	29069	DATA	34218	209	106	ref|NM_007860|ens|ENSMUST00000145332|ens|ENSMUST00000150974|ens|ENSMUST00000082426	mm|chr4:106979447-106979388	0	NA	301	CCCAACTGCACCGTGGTCTGCCTCTCAGGACAGAAGTGCAACATCTGGGATTTCATTCAA	31125	0	A_55_P2039429	Dio1	NM_007860	ref|Mus musculus deiodinase, iodothyronine, type I (Dio1), mRNA [NM_007860]	0.976535	0.845077	1.95501	0.243546	1.92704	2	0	0	0	1.62859	0.00134622	0.00134622	1.49431	0.00134622	1.43395	0.00134622	1.57138	0.00134622	1.6738	2.09338	2.09786
4676	29407	DATA	3744	23	136	gb|AK031201|gb|AK158168|tc|TC1616104|riken|5930428D04	mm|chr2:141056377-141056318	0	NA	2921	GCACAGAGAGAGCTTTGTTTTTAAAATGTCATATGGGGTGGTTAGAAGTAGGGGAAAATA	3691	0	A_66_P140804	Macrod2os1	AK031201	gb|Mus musculus 13 days embryo forelimb cDNA, RIKEN full-length enriched library, clone:5930428D04 product:unclassifiable, full insert sequence. [AK031201]	1.29599	1.12261	2.7003	0.563979	1.93609	2	0	0	0	0.00185164	0.00185164	0.00185164	1.87864	0.00185164	2.00748	0.00185164	0.00185164	0.00185164	3.34066	2.27751	2.48274
4734	62	DATA	116	1	116	ref|NM_001290811|ref|NM_001290812|ref|NM_029475|ens|ENSMUST00000028702	mm|chr2:120982336-120982395	0	NA	2394	AGAGGAAATAACCCTTTCCTCCTTACATTACATTTGGTTATGGTGTTTTGTCACAGCATT	227	0	A_55_P2132942	Adal	NM_001290811	ref|Mus musculus adenosine deaminase-like (Adal), transcript variant 2, mRNA [NM_001290811]	0.955659	0.0194369	1.05602	0.0541725	3.02018	2	0	0	0	0.946783	0.942244	0.977949	0.990355	0.950414	1.37343	0.994137	0.953743	0.702901	1.10564	0.998222	1.06419
4762	235	DATA	515	4	23	ref|NM_001100109|ens|ENSMUST00000110708|gb|AK136033|tc|TC1678638	mm|chr12:56290133-56290192	0	NA	3218	TTATCCATAGAGCCATGTCATTGGCCACAGTTCCAAAGAAAGAGAGGAAGGAAGGAAAGG	360	0	A_55_P1979818	Srp54b	NM_001100109	ref|Mus musculus signal recognition particle 54B (Srp54b), mRNA [NM_001100109]	0.803397	0.072726	1.12384	0.263276	2.03205	2	0	0	0	0.844139	0.84662	0.719433	1.83689	1.72288	1.07947	0.898863	0.680099	8.05e-05	1.42344	0.929377	1.01871
4771	315	DATA	684	5	28	ref|NM_025740|ens|ENSMUST00000141862|ens|ENSMUST00000020754|ref|XM_011243697	mm|chr11:29130664-29130605	0	NA	549	CTGACTGCTTAACTGATGGTGCAGATGTGGTCAGTGACCTTGAACAGGAAGAGATGAAAA	685	0	A_51_P521125	Cfap36	NM_025740	ref|Mus musculus cilia and flagella associated protein 36 (Cfap36), mRNA [NM_025740]	0.905536	0.0674847	1.11987	0.0643746	3.98051	3	0	0	0	0.967427	0.833587	0.915594	1.22743	1.24621	1.01815	1.02111	0.813224	0.597654	1.0909	1.19364	1.07507
4777	344	DATA	754	5	98	gb|AK030337|gb|BC036160|gb|BC036156|gb|AK008832	mm|chr10:80858017-80858076	0	NA	781	AGGACCTCATCCAAGGGTCTCCCGTTCTTGAGTTCTCCAGGGCAAGCAGTTCCAGCAATG	822	0	A_55_P2031403	Smim24	AK030337	gb|Mus musculus 11 days pregnant adult female ovary and uterus cDNA, RIKEN full-length enriched library, clone:5033427P15 product:weakly similar to HSPC323 (FRAGMENT) [Homo sapiens], full insert sequence. [AK030337]	1.08462	0.110758	0.914987	0.0601751	2.33093	3	0	0	0	1.20727	0.991922	1.05466	0.907264	0.900086	1.39178	1.14202	1.05208	0.607967	0.845507	0.950394	0.949059
4806	483	DATA	1105	7	121	ref|NM_178746|ens|ENSMUST00000052514|ref|XM_006517671|ref|XM_011244666	mm|chr13:113521855-113521914	0	NA	1807	GCTCAGTTTTTCATGTGAAAACTCTCTTCTCAAGATTTCTCGTGGTATTCTGAACCTTGG	1183	0	A_52_P236963	Slc38a9	NM_178746	ref|Mus musculus solute carrier family 38, member 9 (Slc38a9), mRNA [NM_178746]	0.886448	0.0408973	1.07182	0.0938561	3.1361	2	0	0	0	0.856514	0.869782	0.933046	1.02899	1.08178	1.33931	0.978016	1.09547	0.601641	1.00581	1.03039	1.17926
4832	641	DATA	1468	9	156	ref|NM_146152|ens|ENSMUST00000140661|ens|ENSMUST00000134752|ens|ENSMUST00000036156	mm|chr4:117567900-117567841	0	NA	3157	CTGCTGCCTCGATGTGGGGAAATAGAGTCTGTGGGGAAAGTGGTACAGGAAGATGGCCGT	1573	0	A_66_P124602	Ipo13	NM_146152	ref|Mus musculus importin 13 (Ipo13), mRNA [NM_146152]	0.896709	0.0848567	1.11042	0.0966976	2.87717	3	0	0	0	0.812752	0.894936	0.982438	1.0089	1.01481	1.2705	1.02259	0.97913	0.682699	1.17742	1.15426	0.999562
4834	662	DATA	1520	10	44	ref|NM_133766|ens|ENSMUST00000173858|ens|ENSMUST00000174749|ens|ENSMUST00000015146	mm|chr15:65693222-65693281	0	NA	2263	CGCCTTTCTAGAAGAAAAAGTATTGTGGATACTGTATCTATTCAGGTGGATATTTTATCC	1355	0	A_52_P271377	Efr3a	NM_133766	ref|Mus musculus EFR3 homolog A (S. cerevisiae) (Efr3a), mRNA [NM_133766]	0.869969	0.137703	1.12796	0.0893916	2.72185	3	0	0	0	0.714195	0.920234	0.97548	1.13268	1.11306	1.24637	1.12494	0.886339	0.502819	1.05741	1.09798	1.22849
4851	758	DATA	1731	11	91	ref|NM_173027|ens|ENSMUST00000025046|gb|AK052857|gb|AK179886	mm|chr17:27280975-27280916	0	NA	2245	TTAGGGAAATAAATTTGTTAATAAAATTGCTGAGGTCACCAGTGATTACTGGTGCGCCTT	1765	0	A_55_P1984695	Ip6k3	NM_173027	ref|Mus musculus inositol hexaphosphate kinase 3 (Ip6k3), mRNA [NM_173027]	0.773751	0.180266	1.19738	0.111192	3.46432	3	0	0	0	0.813924	0.576787	0.930541	1.37594	1.09242	1.20472	0.937246	1.18102	0.295278	1.32325	1.15635	1.11253
4861	824	DATA	1862	12	58	ens|ENSMUST00000097419|ens|ENSMUST00000024636|ref|XM_006523355|ref|XM_006523356	mm|chr17:8389281-8389340	0	NA	3116	TCTGCATGTAATAAATGTCTCTTTGAACAGTGGATTAAAATGTTGGCCGGCAGTATCCTC	1703	0	A_55_P2153827	Fgfr1op	ENSMUST00000097419	ens|Fgfr1 oncogene partner [Source:MGI Symbol;Acc:MGI:1922546] [ENSMUST00000097419]	0.874429	0.217156	1.09014	0.0184742	1.71433	2	0	0	0	1.06996	0.640713	0.912615	1.04659	1.00386	1.56242	0.888013	0.943314	0.662106	1.11125	1.08226	1.07691
4862	826	DATA	1864	12	60	ref|NM_009541|ens|ENSMUST00000130482|ens|ENSMUST00000142020|ens|ENSMUST00000006377	mm|chr4:141022780-141022839	0	NA	2342	CGCTTGTGATTCCTGTGGGGACAAGTTCCTGGATGCCAATAGCCTAGCCCAGCATGTTCG	1707	0	A_51_P463849	Zbtb17	NM_009541	ref|Mus musculus zinc finger and BTB domain containing 17 (Zbtb17), mRNA [NM_009541]	0.922095	0.0400274	1.08141	0.083193	2.98891	2	0	0	0	0.941573	0.876057	0.948656	1.14048	1.0096	1.02362	1.09644	0.964149	0.755206	1.0743	1.002	1.16793
4863	840	DATA	1900	12	96	ref|NM_021890|ens|ENSMUST00000115995|gb|AK080414|gb|AK172509	mm|chr19:10132641-10132700	0	NA	1748	TAAAATGACACGGTGAGCATAGCATGTTTTCCTAGAGCAAGAACTGGAAGGAAAACTTGT	1775	0	A_51_P464029	Fads3	NM_021890	ref|Mus musculus fatty acid desaturase 3 (Fads3), mRNA [NM_021890]	0.860414	0.174522	1.08987	0.0884583	2.03118	2	0	0	0	0.982642	0.938057	0.660544	1.0829	1.10985	1.35923	1.10179	1.04184	0.453562	1.0363	1.19197	1.04133
4870	877	DATA	1990	13	22	ref|NM_025375|ens|ENSMUST00000134180|ens|ENSMUST00000147756|ens|ENSMUST00000085984	mm|chr5:135529280-135529221	0	NA	1062	ACACCCAGTACACCGGCCGAAAGCGCAAGCCCCGCTTCTGAGTGCGCTGTATTTAATCAA	1942	0	A_51_P456590	Wbscr22	NM_025375	ref|Mus musculus Williams Beuren syndrome chromosome region 22 (Wbscr22), mRNA [NM_025375]	1.08371	0.0959382	0.946432	0.100106	1.71482	3	0	0	0	1.19391	1.03835	1.01886	1.00279	1.09535	1.19863	1.12963	0.921363	0.561817	0.830941	1.00836	1
4881	956	DATA	2162	14	30	ref|NM_007943|ref|NM_001159964|ens|ENSMUST00000030281|ens|ENSMUST00000102729	mm|chr4:109058616-109058675	0	NA	3376	TTCTGCATAGATCTACTCCACTATTGAAAACTGGATAAGTTAAACCATTATTGCTCCAGC	1958	0	A_55_P2815434	Eps15	NM_007943	ref|Mus musculus epidermal growth factor receptor pathway substrate 15 (Eps15), transcript variant 1, mRNA [NM_007943]	0.865095	0.130361	1.16853	0.127335	2.88409	3	0	0	0	0.930729	0.949594	0.714962	0.957391	1.17354	1.27561	1.13602	0.97156	0.385002	1.30592	1.05448	1.1452
4917	1182	DATA	2660	17	36	ref|NM_008112|ens|ENSMUST00000059515|gb|AK079690|gb|AK143681	mm|chr13:3565007-3565066	0	NA	2180	TGTTCCAAAATGGCTCCAGATGATTTCTGTACTGCAAAATAAAGCCAAACTCTGGAAACC	2594	0	A_55_P2732693	Gdi2	NM_008112	ref|Mus musculus guanosine diphosphate (GDP) dissociation inhibitor 2 (Gdi2), mRNA [NM_008112]	0.899352	0.0759404	1.09749	0.0386518	4.02749	2	0	0	0	0.964989	0.916889	0.816177	1.06528	1.07396	1.2767	1.01573	1.0328	0.544997	1.13907	1.06265	1.09076
4954	1410	DATA	3210	20	94	ref|NM_172484|ref|NM_001081756|ref|NM_176957|ens|ENSMUST00000112583	mm|chr1:127810468-127810409	0	NA	6818	TTTATAATTCCTTCTGTACAGAAGCCTACAGACCAGGCAGACTAGAGCTATGTTTAGGAT	3018	0	A_51_P379478	Nckap5	NM_172484	ref|Mus musculus NCK-associated protein 5 (Nckap5), transcript variant 2, mRNA [NM_172484]	0.696497	0.370512	1.34238	0.137473	2.83076	2	0	0	0	0.617019	1.1003	0.372173	1.06842	1.2911	1.28384	0.663423	0.897894	0.678703	1.25686	1.50096	1.26931
4955	1413	DATA	3216	20	100	ref|NM_009642|ref|NM_001301281|ens|ENSMUST00000030865|ref|XM_006544748	mm|chr4:147454490-147454431	0	NA	708	CTGAGTCATGTGCCCTTGGAGGTCAAGAGCCTCTAGCTTCTCAGTGGAGAAGAGCCCAGT	3029	0	A_52_P552550	Agtrap	NM_009642	ref|Mus musculus angiotensin II, type I receptor-associated protein (Agtrap), transcript variant 1, mRNA [NM_009642]	1.04846	0.101986	0.899974	0.0288182	2.42676	2	0	0	0	1.04764	0.94689	1.15086	0.875641	1.07076	1.4908	1.0598	1.32717	0.330524	0.916036	0.866705	0.917183
4957	1416	DATA	3222	20	106	ens|ENSMUST00000119999	mm|chr2:149936409-149936350	0	NA	903	GCAGAATCCTGGTGGGGCATGCACTACACAATGATCTAAAGGTTTTGTCCATCCAAAAAA	3041	0	A_55_P2148385	ENSMUST00000119999	ENSMUST00000119999	ens|predicted gene 14140 [Source:MGI Symbol;Acc:MGI:3649719] [ENSMUST00000119999]	1.21156	0.323897	0.845949	0.0359329	1.94322	2	0	0	0	0.91574	1.55766	1.16129	0.909372	0.795713	1.39542	1.10234	0.927463	0.697153	0.884769	0.813852	0.839228
4958	1421	DATA	3234	20	118	ref|NM_001099637|ens|ENSMUST00000195717|ens|ENSMUST00000057037|ref|XM_006496938	mm|chr1:178664035-178663976	0	NA	6678	CGTTTGGTACTGAGTCTATCTACATGAAGAATACAAGATAAGGAGTCTAAGAAGGTATTA	3065	0	A_55_P2801325	Cep170	NM_001099637	ref|Mus musculus centrosomal protein 170 (Cep170), mRNA [NM_001099637]	1.10027	0.0358309	0.905518	0.0828722	3.73611	2	0	0	0	1.10446	1.06253	1.13382	0.892111	1.0305	1.4289	0.960163	1.28575	0.385209	0.813575	0.97446	0.92852
4994	1668	DATA	3797	24	25	ref|NM_024217|ens|ENSMUST00000034343|ref|XM_006531326|ref|XM_006531329	mm|chr8:106871417-106871476	0	NA	1460	AATACAAAAACAATGTAACAAATGGTCTTTTCTGTAACCTAAGAGGCCCCATGAATAAGG	3489	0	A_51_P321886	Cmtm3	NM_024217	ref|Mus musculus CKLF-like MARVEL transmembrane domain containing 3 (Cmtm3), mRNA [NM_024217]	0.948081	0.0744329	1.05639	0.0481934	2.11566	3	0	0	0	0.986158	0.862312	0.995772	1.02388	1.01707	1.30582	0.934416	1.01507	0.69033	1.00111	1.07849	1.08957
5010	1755	DATA	3984	25	48	ens|ENSMUST00000118417|nap|NAP114407-1	mm|chr2:149569786-149569845	0	NA	875	CTTCGATGCCGGGGCTGGCATCTTTGTCAAGCTCATTTCCTGTTATGACAATGAATACAG	3832	0	A_66_P111217	ENSMUST00000118417	ENSMUST00000118417	ens|predicted gene 14130 [Source:MGI Symbol;Acc:MGI:3652217] [ENSMUST00000118417]	0.868894	0.10606	1.13999	0.0888068	3.39446	3	0	0	0	0.956618	0.899039	0.751025	1.06239	1.11339	1.13874	1.0749	1.09493	0.48898	1.12028	1.0627	1.237
5020	1817	DATA	4139	26	39	ref|NM_001290335|ref|NM_001256000|ref|NM_001256001|ref|NM_001256002	mm|chr6:118691922-118685016	0	NA	785	TTGTACTTAACTTGGTTCTCGGTGTTCTTAGCGGGGAGTTTTCCAAAGAGAGGGAGAAAG	3815	0	A_55_P2741079	Cacna1c	NM_001290335	ref|Mus musculus calcium channel, voltage-dependent, L type, alpha 1C subunit (Cacna1c), transcript variant 11, mRNA [NM_001290335]	0.926516	0.037166	1.43581	0.144212	5.92335	2	0	0	0	0.887399	0.961361	0.930788	1.12998	1.42042	1.40143	0.000371	0.960435	0.000371	1.31404	1.59506	1.39834
5021	1824	DATA	4150	26	50	ref|NM_023370|ref|NM_001252635|ens|ENSMUST00000156501|ens|ENSMUST00000153525	mm|chr10:59767671-59767612	0	NA	9941	GCAGTCAAGCCCGATGATGACAGATACCTGCGTGCAGCCATCCAGGAATACGACAACATC	3837	0	A_52_P416341	Cdh23	NM_023370	ref|Mus musculus cadherin 23 (otocadherin) (Cdh23), transcript variant 1, mRNA [NM_023370]	0.999034	0.24548	1.36348	0.235881	1.85419	3	0	0	0	0.733864	1.21836	1.04488	1.10116	0.965088	2.23675	0.000795	0.607856	0.000795	1.22565	1.22896	1.63585
5039	1914	DATA	4369	27	105	ref|NM_198703|ref|NM_001185020|ref|NM_001185021|ref|NM_001199083	mm|chr6:119922819-119921070	0	NA	2389	TTGAAGGATGTATCCGACAAAACAAAGATGAAAGATATTCCATCAAAGACCTTTTGAACC	4236	0	A_52_P82209	Wnk1	NM_198703	ref|Mus musculus WNK lysine deficient protein kinase 1 (Wnk1), transcript variant 1, mRNA [NM_198703]	0.784389	0.12846	1.17877	0.114977	3.96224	3	0	0	0	0.772283	0.918473	0.66241	1.10561	1.19976	1.43664	1.00305	0.992142	0.373321	1.09375	1.13297	1.30959
5045	1942	DATA	4425	27	161	ref|NM_001033219|ens|ENSMUST00000150409|ens|ENSMUST00000130765|ens|ENSMUST00000076224	mm|chr15:73436437-73436378	0	NA	488	CAAGAGAAGTAACTACAGCGCCTTCACAGTCATGATGATGAAACTGGTATTAACTGAGTG	4343	0	A_55_P2720015	Slc45a4	NM_001033219	ref|Mus musculus solute carrier family 45, member 4 (Slc45a4), transcript variant 1, mRNA [NM_001033219]	0.746314	0.296302	1.18989	0.110824	2.42861	2	0	0	0	0.417241	0.829745	0.991956	1.05891	1.11077	1.76422	0.625029	0.850998	0.781479	1.26517	1.24186	1.06263
5048	1952	DATA	4449	28	21	ref|NM_010872|ref|NM_001126182|ens|ENSMUST00000117913|ens|ENSMUST00000067975	mm|chr13:100914271-100914212	0	NA	4599	TTCTAGTACATTTCACTCTAGACAGGCATGGTGCAATCCTAGTACTTAGGAGCCTGAGCA	4079	0	A_55_P1984243	Naip2	NM_010872	ref|Mus musculus NLR family, apoptosis inhibitory protein 2 (Naip2), transcript variant 1, mRNA [NM_010872]	0.715078	0.223027	1.32175	0.0861479	4.395	2	0	0	0	0.944853	0.700908	0.499474	1.44083	1.36247	0.627012	0.888299	1.24399	0.3269	1.29337	1.41851	1.25338
5051	1958	DATA	4464	28	36	ref|NM_001293673|ref|NM_009145|ens|ENSMUST00000177380|ens|ENSMUST00000176126	mm|chr9:58475672-58475731	0	NA	487	GAATACCACTGTGTATATCATTTTGTCAGCGCTCCTAAAGCAAATGCCACCATTGAAGTG	4105	0	A_66_P107985	Nptn	NM_001293673	ref|Mus musculus neuroplastin (Nptn), transcript variant 2, mRNA [NM_001293673]	0.815206	0.083289	1.1061	0.0882679	4.15161	3	0	0	0	0.820579	0.72936	0.895678	1.3156	1.02523	1.30852	0.942074	0.994761	0.649897	1.08637	1.20256	1.02936
5071	2115	DATA	4815	30	59	ref|NM_009679|ref|NM_001302970|ens|ENSMUST00000007216|gb|BC089342	mm|chr16:20543921-20543980	0	NA	1875	GCTTCGTTTTGTACACGTGTGACTTTGTCCAGTTACAAACCCAATAAACAATAGAGTGGA	4459	0	A_55_P1969857	Ap2m1	NM_009679	ref|Mus musculus adaptor-related protein complex 2, mu 1 subunit (Ap2m1), transcript variant 1, mRNA [NM_009679]	0.820369	0.188653	1.1992	0.00746872	3.47542	2	0	0	0	1.03699	0.731935	0.692179	1.2427	1.05213	0.834072	1.12623	1.1369	0.54925	1.20542	1.19092	1.20127
5074	2135	DATA	4862	30	106	ref|NM_174988|ens|ENSMUST00000065438|ref|XM_011239238|ref|XM_006498534	mm|chr2:164937545-164937486	0	NA	3047	TGATGACCAATGTCAGGAAAAAGGAGGGGAACCTGGCCTGTGCGGATCTGGGGTTGGACA	4543	0	A_55_P2743475	Cdh22	NM_174988	ref|Mus musculus cadherin 22 (Cdh22), mRNA [NM_174988]	0.663354	0.351886	1.23152	0.152911	2.5649	2	0	0	0	0.743073	0.278448	0.968542	1.08427	1.34351	2.12258	0.918487	0.846284	0.000266	1.10963	1.40309	1.18183
5099	2281	DATA	5179	32	95	ref|NM_172759|ref|NM_001163756|ens|ENSMUST00000109410|ens|ENSMUST00000034355	mm|chr8:107458508-107458567	0	NA	2634	ATGTATGGAAGTGACTTCTTGCCTTTCATAAAATCCTAATAAAACCCATCTTTTCATGGC	4832	0	A_55_P1959500	Ces2e	NM_172759	ref|Mus musculus carboxylesterase 2E (Ces2e), transcript variant 1, mRNA [NM_172759]	0.843528	0.138129	1.16083	0.0769997	3.47532	3	0	0	0	0.944654	0.686148	0.899781	1.1204	1.28353	1.09166	1.13396	0.972231	0.38513	1.22043	1.18818	1.0739
5107	2338	DATA	5312	33	64	ref|NM_001110497|ref|NM_173734|ref|NM_001110496|ens|ENSMUST00000124806	mm|chr2:120188674-120188615	0	NA	1547	GGAATGAAAATGAGAAGTACCAAGCAGGAACCAAATGGGACTAGTAAAGTAAACAAAGCA	5072	0	A_55_P2216997	Tmem87a	NM_001110497	ref|Mus musculus transmembrane protein 87A (Tmem87a), transcript variant 3, mRNA [NM_001110497]	0.629974	0.176161	1.38909	0.214568	4.73606	3	0	0	0	0.757438	0.428957	0.703528	1.66684	1.19108	1.1685	1.09775	0.818255	0.000404	1.26504	1.63685	1.26537
5127	2462	DATA	5629	35	53	ref|NM_020022|ens|ENSMUST00000023867|gb|AK011353|gb|AK011649	mm|chr5:135074068-135074127	0	NA	1387	TACAGTGAGATACTGAGCTCTGGAAGTGACACACCTCTGCTTTTCTGTGTGAATTCAACC	5356	0	A_55_P2870994	Rfc2	NM_020022	ref|Mus musculus replication factor C (activator 1) 2 (Rfc2), mRNA [NM_020022]	0.906653	0.0490259	1.04481	0.0522808	3.33865	3	0	0	0	0.871536	0.88576	0.962665	1.14559	1.08557	1.36965	1.02141	0.872815	0.650594	1.06219	1.08618	0.986048
5129	2483	DATA	5671	35	95	ref|NM_027060|ref|NM_172618|ens|ENSMUST00000168787|ens|ENSMUST00000079924	mm|chr17:30352528-30352469	0	NA	6797	GTTCATGTGTGTACAAGGTCATGACGGGCTCACCATAGAAATAAAGCAGTGTCTTCGATA	5437	0	A_55_P1968553	Btbd9	NM_027060	ref|Mus musculus BTB (POZ) domain containing 9 (Btbd9), transcript variant 1, mRNA [NM_027060]	0.907601	0.0448432	1.12962	0.0161823	8.06632	2	0	0	0	0.868229	0.898161	0.956412	0.875787	1.10113	1.35218	0.908037	1.01446	0.636735	1.12663	1.11514	1.14709
5136	2540	DATA	5794	36	54	ref|NM_138593|ens|ENSMUST00000197698|ens|ENSMUST00000123179|ens|ENSMUST00000195976	mm|chr3:127249636-127249577	0	NA	637	GGGATCCTAAGGGATTTGCCTTTGTGGAATTTGAAACAAAAGAGCAAGCAGCAAAAGCCA	5358	0	A_51_P357486	Larp7	NM_138593	ref|Mus musculus La ribonucleoprotein domain family, member 7 (Larp7), mRNA [NM_138593]	0.912891	0.154941	1.08913	0.0434252	1.89703	2	0	0	0	0.967848	0.737961	1.03286	1.17437	1.10528	0.9786	1.13648	1.0298	0.569411	1.12813	1.09693	1.04233
5145	2610	DATA	5967	37	63	ref|NM_181857|ref|NM_001289803|ref|NM_001289804|ens|ENSMUST00000042954	mm|chr5:34349906-34349847	0	NA	2915	GCTAAACTGATACAGACCACACAAAACCTTTGTGGGACAACTGGGACACCTGAAGTAAAA	5680	0	A_55_P2080531	Poln	NM_181857	ref|Mus musculus DNA polymerase N (Poln), transcript variant 1, mRNA [NM_181857]	0.498382	0.240372	1.24029	0.228466	3.87491	3	0	0	0	0.400898	0.322066	0.772183	1.50073	1.62875	2.28337	0.557651	0.449327	0.36416	1.10484	1.11196	1.50406
5159	2710	DATA	6189	38	121	gb|AK078316|gb|AK021081|tc|TC1600393|riken|C030014I23	mm|chr9:44290197-44290256	0	NA	888	CATTTACCCCTTCCTTGTAAATTCGTGGTGGTAACCATTGAGATAATATAGGCAATGCTT	5792	0	A_55_P2732573	C030014I23Rik	AK078316	gb|Mus musculus adult male olfactory brain cDNA, RIKEN full-length enriched library, clone:6430593K19 product:unclassifiable, full insert sequence. [AK078316]	0.788139	0.122058	1.17255	0.168404	3.20128	3	0	0	0	0.705201	0.730922	0.928294	1.087	1.08504	1.45267	0.782364	0.971176	0.739687	1.35404	1.14225	1.02135
5167	2742	DATA	6278	39	46	ref|NM_027288|ens|ENSMUST00000029814|ref|XM_006500908|ref|XR_867210	mm|chr3:135234096-135234155	0	NA	3402	TTTAGGCTTACCACTGATTCTGATGGACTCTCGAATCCAAAGTTAGGAGCTACATTTAAA	5956	0	A_51_P454103	Manba	NM_027288	ref|Mus musculus mannosidase, beta A, lysosomal (Manba), mRNA [NM_027288]	0.871632	0.000822	1.11306	0.0917227	4.55882	2	0	0	0	0.870753	0.872382	0.871761	1.08355	1.1737	0.935299	0.900078	1.05974	0.893561	1.07913	1.04313	1.21691
5170	2770	DATA	6339	39	107	gb|L28118|tc|NP1216884	mm|chr3:135247958-135247898	0	NA	1648	GGTGCCTTTCTAGCCATCTACTGTAAGTTGTGCATTCAAATTAAGATTAAGGAAAAACAT	6070	0	A_55_P2745489	Nfkb1	L28118	gb|Mouse NF-kappa-B (p105) mRNA. [L28118]	1.05157	0.0173879	0.901726	0.0679354	3.70095	2	0	0	0	1.04816	1.0704	1.03613	0.972031	1.37263	1.1805	0.852991	0.994357	0.767613	0.889357	0.840825	0.974996
5176	2824	DATA	6469	40	73	ref|NM_139311|ens|ENSMUST00000151729|ens|ENSMUST00000143220|ens|ENSMUST00000155835	mm|chr11:97537456-97537515	0	NA	2066	CAGACCTAGAAGACTGCAGCTTCCGGTGTCACGGGACCTCCCCCCAGGAGAGTCTCTCTT	6007	0	A_52_P442191	Mllt6	NM_139311	ref|Mus musculus myeloid/lymphoid or mixed-lineage leukemia (trithorax homolog, Drosophila); translocated to, 6 (Mllt6), mRNA [NM_139311]	0.750262	0.11118	1.2049	0.180854	3.70927	3	0	0	0	0.628617	0.84662	0.77555	1.20916	1.51676	1.39969	0.755426	1.25308	0.000383	1.39379	1.1876	1.03332
5179	2834	DATA	6489	40	93	ens|ENSMUST00000182449|nap|NAP060554-1	mm|chr18:56132666-56132725	0	NA	726	AGATCTGACATGCTGCCTGGAGAAACTTGCCAAGTATAACGACATCAAGAAGGTGGTGAA	6043	0	A_55_P2144003	ENSMUST00000182449	ENSMUST00000182449	ens|predicted gene 6944 [Source:MGI Symbol;Acc:MGI:3645932] [ENSMUST00000182449]	0.892981	0.158523	1.18607	0.103539	2.6811	3	0	0	0	1.0292	0.930764	0.71898	1.02506	1.18295	0.83538	1.08125	1.19601	0.442211	1.15398	1.10237	1.30185
5186	2913	DATA	6682	41	122	ens|ENSMUST00000064353	mm|chr15:10490539-10490480	0	NA	740	ATCTGACGTGCTGTTTGGAGAAACCTGCCAAGTATGAAGACATCAAGAAGGTGGTGAACA	6401	0	A_55_P2103682	ENSMUST00000064353	ENSMUST00000064353	ens|predicted gene 8174 [Source:MGI Symbol;Acc:MGI:3648322] [ENSMUST00000064353]	0.921177	0.0855789	1.10041	0.0776879	2.68585	3	0	0	0	0.962613	0.822767	0.978151	0.943844	1.01661	1.29969	1.02784	1.15446	0.492799	1.07046	1.04215	1.18861
5187	2919	DATA	6693	41	133	ref|NM_013492|ens|ENSMUST00000022616|ref|XM_006518504|ref|XM_006518503	mm|chr14:66600325-66600382	0	NA	1750	CTCGGGAAGAACTGATTCCCCCACGCAACTAATCCAATAAAAGCCGCCTTGCGATACGTG	6422	0	A_55_P2017929	Clu	NM_013492	ref|Mus musculus clusterin (Clu), mRNA [NM_013492]	0.913753	0.0641506	1.0559	0.0398374	3.26047	3	0	0	0	0.983446	0.85717	0.900644	1.05946	1.10269	1.1934	0.949898	0.868604	0.916978	1.07693	1.00996	1.08082
5212	3091	DATA	7150	44	98	ref|NM_145429|ref|NM_001271359|ref|NM_001271360|ref|NM_001271358	mm|chr11:70253715-70253774	0	NA	1339	CTGAAGGGAATGAAGGATGATGACTGTGATGACCAGTTTTGCTAGGACGAGGGGCTGGGA	6656	0	A_51_P146058	Arrb2	NM_145429	ref|Mus musculus arrestin, beta 2 (Arrb2), transcript variant 3, mRNA [NM_145429]	0.881929	0.0214834	0.979326	0.0584328	2.70969	2	0	0	0	0.905296	0.877457	0.863034	1.19434	1.01682	1.87248	0.783539	0.850372	0.698678	0.93452	1.04542	0.958041
5235	3226	DATA	7486	46	106	ref|NM_011585|ref|NM_001164078|ref|NM_001164079|ens|ENSMUST00000134142	mm|chr6:86380500-86380559	0	NA	1577	TCATGAAATTACTTTTCATCCACATTGTTTTAAAAAGGAACACGATGGTGGATGTTTGCC	6972	0	A_52_P516059	Tia1	NM_011585	ref|Mus musculus cytotoxic granule-associated RNA binding protein 1 (Tia1), transcript variant 1, mRNA [NM_011585]	1.00371	0.0501304	1.12118	0.0241971	3.65496	2	0	0	0	1.05694	0.996805	0.957398	1.1968	1.00364	1.22824	0.698356	0.845553	0.65273	1.09384	1.13986	1.12983
5250	3330	DATA	7738	48	30	ref|NM_001081139|ens|ENSMUST00000122960|ens|ENSMUST00000048427|ref|XM_011240062	mm|chr3:96494868-96494927	0	NA	3964	GAAAACCTGGACCCTGGAATCAGCACAGATGAGACCAGAATTGTGGATGTAAATTAGCTC	7136	0	A_66_P136701	Ankrd35	NM_001081139	ref|Mus musculus ankyrin repeat domain 35 (Ankrd35), mRNA [NM_001081139]	0.63909	0.241041	1.26977	0.0598135	4.39847	2	0	0	0	0.52951	0.472306	0.915454	1.48459	1.37609	1.17532	1.00312	0.740161	0.494151	1.29665	1.31142	1.20123
5268	3470	DATA	8103	50	67	ref|NM_023739|ens|ENSMUST00000136717|ens|ENSMUST00000098143|gb|AK007054	mm|chr4:40972103-40972162	0	NA	3633	TGGATTTTTAATCATGTGTTTGAAGAGGCTCCTCACATATCACTGTGATTACTAAGAGAT	7488	0	A_52_P408008	Nfx1	NM_023739	ref|Mus musculus nuclear transcription factor, X-box binding 1 (Nfx1), transcript variant 1, mRNA [NM_023739]	0.932011	0.0602692	1.1698	0.0795125	4.12795	3	0	0	0	0.888882	1.00088	0.906276	1.28072	1.01687	1.04325	0.625082	0.986644	0.742006	1.07948	1.22924	1.20068
5277	3522	DATA	8245	51	45	ens|ENSMUST00000047144|gb|AK030332|tc|TC1645329|tc|TC1717734	mm|chr15:84774700-84774641	0	NA	6510	CTCACTGTATATGCCCATGTCAACTGGAGACATCAGACTTTGTGCTTGTTAAAGGGAAGG	7742	0	A_52_P43727	5031439G07Rik	ENSMUST00000047144	ens|RIKEN cDNA 5031439G07 gene [Source:MGI Symbol;Acc:MGI:2444899] [ENSMUST00000047144]	0.920294	0.119029	1.11605	0.0480028	2.64178	2	0	0	0	1.05748	0.858918	0.844479	1.00625	1.15753	1.05723	1.10291	1.01366	0.553403	1.07384	1.16827	1.10604
5299	3666	DATA	8623	53	95	ref|NM_198093|ref|NM_080288|ens|ENSMUST00000072519|ref|XM_006516544	mm|chr13:20698247-20698306	0	NA	2123	ACATTTTTTGCCAAACAGATATATATTTAATGAAGAGATACATAAATGTGTGTACTTTCC	8131	0	A_52_P613688	Elmo1	NM_198093	ref|Mus musculus engulfment and cell motility 1 (Elmo1), transcript variant 2, mRNA [NM_198093]	0.599419	0.349457	1.39739	0.194757	3.45478	3	0	0	0	0.829248	0.77174	0.197269	1.03622	1.4734	1.10471	1.00831	1.38672	0.000201	1.224	1.60811	1.36006
5347	3925	DATA	9221	57	37	ref|NM_001252434|ref|NM_001252435|ref|NM_001252436|ref|NM_001252433	mm|chr16:31805808-31812800	0	NA	1691	ACGAGATCACTAGGGAACCTAGAAAAGTTGTTCTTCATCGTGGCTCAACAGGACTTGGTT	8617	0	A_55_P2786076	Dlg1	NM_001252434	ref|Mus musculus discs, large homolog 1 (Drosophila) (Dlg1), transcript variant 3, mRNA [NM_001252434]	0.861222	0.0520479	1.11083	0.107191	3.62827	2	0	0	0	0.805624	0.869256	0.908786	1.1502	1.57818	0.989869	0.70092	0.949279	0.715382	1.15088	0.989387	1.19224
5349	3950	DATA	9287	57	103	ref|NM_178929|ens|ENSMUST00000111948|ens|ENSMUST00000026234|ref|XM_006526568	mm|chr19:45153547-45153606	0	NA	1147	AGCAGGGTCCTTACATGGATTGTTTAATGCTCAGTGTAGCCTCAGCTCATCTTTCCTCAA	8729	0	A_51_P493522	Kazald1	NM_178929	ref|Mus musculus Kazal-type serine peptidase inhibitor domain 1 (Kazald1), mRNA [NM_178929]	1.08343	0.0648077	0.942122	0.0582226	2.80943	3	0	0	0	1.01782	1.14741	1.08507	0.823374	1.02243	1.35344	0.99363	1.02629	0.70418	0.875029	0.97938	0.971958
5358	3995	DATA	9393	58	45	ref|NM_009790|ens|ENSMUST00000110082|gb|BC021618|gb|BC018592	mm|chr12:101447936-101447995	0	NA	3920	GGGGGACCAACTCTATGGAAATTGTAAATAAGTTTTATTTATAAACCTGGCACTGTATTC	8629	0	A_55_P2742246	Calm1	NM_009790	ref|Mus musculus calmodulin 1 (Calm1), mRNA [NM_009790]	0.817155	0.0759924	1.12249	0.0183813	6.76434	2	0	0	0	0.902642	0.791554	0.75727	1.20802	1.1784	1.00785	1.00066	1.03203	0.75409	1.13222	1.13397	1.10129
5367	4090	DATA	9630	59	118	ref|NM_021434|ens|ENSMUST00000022728|ref|XM_006519335|gb|AK170316	mm|chr14:118562107-118562166	0	NA	1529	CTCAGCAGAAAGGAATAGAAGCTCCGGAGTGAACTCAAACAGTGAACTTCCCAGAAAGAA	9043	0	A_51_P214882	Gpr180	NM_021434	ref|Mus musculus G protein-coupled receptor 180 (Gpr180), mRNA [NM_021434]	1.06484	0.0795348	0.934674	0.0397161	2.53596	2	0	0	0	0.973036	1.10841	1.11306	0.964362	1.03747	1.34292	0.931215	1.00587	0.719631	0.967769	0.890633	0.94562
5379	4133	DATA	9721	60	45	ref|NM_027760|ens|ENSMUST00000032388|gb|AF424737|gb|AK017214	mm|chr6:145765937-145765996	0	NA	1565	TTGAGACCATTAGGAAAGCATTGATCTACGTTTATACATGAATACACCCTGAATTAAGAG	8916	0	A_52_P48767	Rassf8	NM_027760	ref|Mus musculus Ras association (RalGDS/AF-6) domain family (N-terminal) member 8 (Rassf8), mRNA [NM_027760]	0.880758	0.0873404	1.07588	0.115022	2.34007	3	0	0	0	0.895321	0.959902	0.787052	0.965601	1.25818	1.01349	1.13716	1.34956	0.406076	1.20819	1.0198	0.999655
5389	4243	Mean	10036	62	32	ref|NM_019634|ens|ENSMUST00000149982|ens|ENSMUST00000076354|ref|XM_006527583	mm|chrX:10173646-10173705	0	NA	1689	CTCTGTCTAGCATGCCAACAAGAATGCATTGATATTGTGAACATTTGTGATACATGTATT	9185	0	A_55_P2047275	Tspan7	NM_019634	ref|Mus musculus tetraspanin 7 (Tspan7), mRNA [NM_019634]	0.948912	0.0363106	1.07669	0.0436269	3.89913	3	0	0	0	0.934064	0.990294	0.922379	1.08472	1.08329	1.0456	0.914779	0.996664	0.798131	1.12011	1.03285	1.07711
5393	4268	DATA	10094	62	90	ref|NM_009202|ens|ENSMUST00000024596|gb|AF010259|gb|U38652	mm|chr17:12845321-12845262	0	NA	1596	TGTGTGACCTAGGTGGGATCTTCACCCCCTTCATGGTGTTCAGGCTGATGGAAGTTTGGC	9288	0	A_52_P229972	Slc22a1	NM_009202	ref|Mus musculus solute carrier family 22 (organic cation transporter), member 1 (Slc22a1), mRNA [NM_009202]	0.732237	0.163069	1.28077	0.117511	4.72682	3	0	0	0	0.867529	0.551174	0.778009	1.19131	1.05716	1.87172	0.453772	0.900213	0.486808	1.16531	1.40023	1.27677
5408	4359	DATA	10319	63	151	ref|XM_011242478|ref|XM_006510194|ref|XM_006510195|ref|XM_011242475	mm|chr9:27158724-27158783	0	NA	10146	ACTGTCTGCACCAGATGTTTGGTGTCATGGATTGCCAAGAGGATTGAAGTTGTTTCATGA	9698	0	A_66_P138044	Igsf9b	XM_011242478	ref|PREDICTED: Mus musculus immunoglobulin superfamily, member 9B (Igsf9b), transcript variant X6, mRNA [XM_011242478]	0.913159	0.0437088	1.10617	0.0420384	5.51272	3	0	0	0	0.955842	0.915141	0.868492	1.26486	1.09454	1.13211	0.731362	0.788656	0.930483	1.0745	1.09015	1.15387
5414	4403	DATA	10425	64	93	ref|NM_011618|ref|NM_001277903|ref|NM_001277904|ens|ENSMUST00000169571	mm|chr7:4460145-4460086	0	NA	594	TGAAACTCCGGATTCTGTCTGAGAGGAAAAAGCCCTTGAACATCGACTACATGGGGGAGG	9593	0	A_51_P362627	Tnnt1	NM_011618	ref|Mus musculus troponin T1, skeletal, slow (Tnnt1), transcript variant 2, mRNA [NM_011618]	0.713246	0.118895	1.3748	0.106116	7.19014	3	0	0	0	0.648414	0.850464	0.640859	1.19149	1.38705	0.901137	1.00348	0.809555	0.443156	1.39375	1.26048	1.47016
5415	4409	DATA	10438	64	106	ref|NM_133780|ens|ENSMUST00000147769|ens|ENSMUST00000124973|ref|XM_006529065	mm|chr1:152263215-152263274	0	NA	2515	GATAATGTAGAAGGATATCGTCGAGAAATAACATCTCTACAAGAGAGAAATCAGAAACTC	9617	0	A_65_P08813	Tpr	NM_133780	ref|Mus musculus translocated promoter region, nuclear basket protein (Tpr), mRNA [NM_133780]	0.869362	0.163501	1.10324	0.0925162	2.15628	3	0	0	0	0.978318	0.948409	0.681358	1.08831	1.13865	1.28353	1.09999	0.944078	0.527648	1.10498	1.19487	1.00986
5443	4636	DATA	11002	68	14	ref|NM_030691|ens|ENSMUST00000047194|gb|AK152580|gb|AK040569	mm|chr7:128207814-128207755	0	NA	1899	GGAGTGGGGGCTTGACATGGATTGTTCTTTGAATATAAGTACCAACAAGGACACACTGCT	10046	0	A_51_P258372	Igsf6	NM_030691	ref|Mus musculus immunoglobulin superfamily, member 6 (Igsf6), mRNA [NM_030691]	0.820338	0.148952	1.223	0.182503	2.96056	3	0	0	0	0.667947	0.965595	0.827471	1.34563	1.05908	1.29659	0.713863	0.839422	0.615419	1.01335	1.30925	1.34638
5463	4781	DATA	11353	70	37	ref|NM_007522|ref|NM_001285453|ens|ENSMUST00000025910|gb|L37296	mm|chr19:7026323-7026382	0	NA	1385	GTCATAACTGGGGACCCGAGGTCGCGAGAAACGTGCTTTATAATAAAGCCTGCGCATGTG	10394	0	A_55_P1962234	Bad	NM_007522	ref|Mus musculus BCL2-associated agonist of cell death (Bad), transcript variant 1, mRNA [NM_007522]	0.943813	0.0745823	1.04256	0.0847809	1.51475	3	0	0	0	0.857699	0.987693	0.986049	1.09342	1.02686	1.07808	0.962275	0.931981	0.948251	1.14026	0.999197	0.98824
5479	4883	DATA	11589	71	109	ref|NM_008182|ens|ENSMUST00000034902|ref|XM_011242663|ref|XM_006510814	mm|chr9:78178915-78178856	0	NA	766	GCCACAGATACTGGCCTCTAATTGTTTGCAATTATAAAATACAATTGTTGATTCTGGCTA	10827	0	A_55_P2170454	Gsta2	NM_008182	ref|Mus musculus glutathione S-transferase, alpha 2 (Yc2) (Gsta2), mRNA [NM_008182]	0.738097	0.194515	1.4064	0.0479161	5.77817	2	0	0	0	0.70154	0.564453	0.948297	1.05423	1.03505	1.42609	0.819934	0.612194	0.619	1.46098	1.38698	1.37125
5486	4921	DATA	11667	72	23	ref|NM_007564|ens|ENSMUST00000021552|gb|AK051035|gb|BB546955	mm|chr12:81208862-81208803	0	NA	2868	GCTGGTCACCACCGTCGCTTTCTATTTTTCTTTCTTTGTGTGAATTCATTTAAAAGAAAA	10670	0	A_55_P2849906	Zfp36l1	NM_007564	ref|Mus musculus zinc finger protein 36, C3H type-like 1 (Zfp36l1), mRNA [NM_007564]	1.12962	0.0768171	0.871459	0.1164	3.20628	3	0	0	0	1.13807	1.20187	1.04893	0.932739	0.893743	1.35932	0.948259	0.898385	0.964308	0.999591	0.842543	0.772242
5496	4976	Mean	11802	72	158	ref|NM_001174053|ref|NM_007595|ref|NM_001174054|ens|ENSMUST00000090443	mm|chr11:5869734-5869675	0	NA	3944	TTTCTGAGCCTTGTAGGTGTACAAAACTTATTCTTATTTTGTTCTGTCTCGGGAAACTGC	10916	0	A_55_P2109377	Camk2b	NM_001174053	ref|Mus musculus calcium/calmodulin-dependent protein kinase II, beta (Camk2b), transcript variant 1, mRNA [NM_001174053]	0.617692	0.235553	1.37602	0.0359561	5.51224	2	0	0	0	0.466465	0.497518	0.889094	1.22501	1.39147	1.49764	0.76644	0.636251	0.502046	1.38752	1.40482	1.33572
5500	4992	DATA	11829	73	21	ens|ENSMUST00000110031|ens|ENSMUST00000133906|ref|XM_006516846|ref|XM_011244372	mm|chr13:53008364-53008305	0	NA	449	AGAGTCACAGCTCACAGAAGCCAGAAGTGACTCCTGACTCCCGGTGCTCTCCTCAGATCT	10965	0	A_55_P2100715	Auh	ENSMUST00000110031	ens|AU RNA binding protein/enoyl-coenzyme A hydratase [Source:MGI Symbol;Acc:MGI:1338011] [ENSMUST00000110031]	1.07698	0.0490049	0.858381	0.132903	2.67302	2	0	0	0	1.0229	1.11845	1.0896	0.882854	1.51276	1.98557	0.89434	0.918226	0.000157	0.707301	0.957252	0.91059
5504	5041	DATA	11944	73	136	ref|NM_008773|ref|NM_001302346|ref|NM_001302347|ens|ENSMUST00000037540	mm|chr7:108145612-108145553	0	NA	2480	ATTCCACTGTGGCCAATCCTATTTCAATTTAAAATTACCAATACAAAGGCGAACCCATTG	11170	0	A_52_P587738	P2ry2	NM_008773	ref|Mus musculus purinergic receptor P2Y, G-protein coupled 2 (P2ry2), transcript variant 1, mRNA [NM_008773]	0.832311	0.0774182	1.0038	0.0278758	3.60987	2	0	0	0	0.843526	0.749897	0.90351	1.28811	1.34248	1.008	1.01764	1.01764	0.817779	0.987233	0.988192	1.03599
5507	5057	DATA	11989	74	17	gb|AK046445|tc|TC1607523|riken|B230385N05|nap|NAP083304-1	mm|chr19:21345706-21345647	0	NA	872	CAGACTTAGTTTGGGTCATTTGTCCTAGGATCTTTGGGATTTATTTCTGTAAACTAGTAA	10958	0	A_55_P1998816	Zfand5	AK046445	gb|Mus musculus adult male corpora quadrigemina cDNA, RIKEN full-length enriched library, clone:B230385N05 product:unclassifiable, full insert sequence. [AK046445]	0.827055	0.0783193	1.10428	0.247994	1.84632	2	0	0	0	0.754671	0.910197	0.816296	1.22363	1.21724	0.885503	0.605426	1.24074	1.03345	0.942255	1.38977	0.980812
5517	5097	DATA	12076	74	104	ref|NM_001290624|ens|ENSMUST00000123172|ens|ENSMUST00000033485|ref|XM_006527652	mm|chrX:7244943-7245002	0	NA	2040	CACTCCATCTTGTTTGTATTAGCGAAGCAATGTAATAGTTGTTAAAGAAACAGGCCTGGC	11112	0	A_51_P133792	Prickle3	NM_001290624	ref|Mus musculus prickle homolog 3 (Drosophila) (Prickle3), mRNA [NM_001290624]	0.909017	0.197252	1.14228	0.0510731	1.98288	2	0	0	0	0.950602	1.08216	0.694289	1.30459	1.17745	1.34065	0.692769	0.796018	0.534637	1.16253	1.18012	1.08419
5542	5220	DATA	12399	76	99	ref|NM_009867|ens|ENSMUST00000000314|ref|XM_011239921|ref|XM_011239922	mm|chr2:179630828-179630887	0	NA	3090	GGCACAGCCCTAACTTGAATTTCTTACCACAAAAGCACTGTTAAAACAAAACAAAAAACA	11403	0	A_55_P2150831	Cdh4	NM_009867	ref|Mus musculus cadherin 4 (Cdh4), mRNA [NM_009867]	0.598308	0.0300494	1.3514	0.23588	5.48556	2	0	0	0	0.569705	0.5956	0.62962	1.10831	1.49916	1.82311	0.729395	0.742596	0.248319	1.12392	1.3354	1.59487
5545	5257	DATA	12498	77	34	ref|NM_009546|ens|ENSMUST00000107896|gb|AK160898|gb|BC006908	mm|chr11:88878330-88878389	0	NA	2285	ATTAGTGTTCCTGTTGTCTTACAGAAAAATCTATAGCTGTTAGTCATGTTCTTTCTCAGG	11578	0	A_52_P654161	Trim25	NM_009546	ref|Mus musculus tripartite motif-containing 25 (Trim25), mRNA [NM_009546]	0.916228	0.205692	1.27737	0.0955534	2.75794	2	0	0	0	0.865873	1.14242	0.740389	0.930108	0.909941	1.31748	0.703043	0.784458	0.774188	1.35072	1.16931	1.31207
5570	5404	DATA	12850	79	58	ref|NM_080285|ens|ENSMUST00000148602|ens|ENSMUST00000090601|ens|ENSMUST00000152499	mm|chr6:18316917-18316858	0	NA	5490	GAACAATGCGAATGGGGCAATAACAAGACATTTCTAAACAGTTATTTTCCATTAAAAGCC	11922	0	A_51_P106779	Cttnbp2	NM_080285	ref|Mus musculus cortactin binding protein 2 (Cttnbp2), mRNA [NM_080285]	1.384	0.678904	0.710735	0.125458	1.68906	2	0	0	0	2.16493	1.05284	0.934219	0.626697	2.09143	0.745194	1.27496	0.97723	0.000297	0.849313	0.604881	0.678012
5618	5748	DATA	13704	84	92	ref|NM_010686|ens|ENSMUST00000151698|gb|AK171149|gb|AK171105	mm|chr4:130490785-130490844	0	NA	1123	AAGAGAATCTGGCCAAGCAATAGTTCCTGGTGTCAGTTTATACTCAGCTGTCAGACGACA	12569	0	A_51_P401668	Laptm5	NM_010686	ref|Mus musculus lysosomal-associated protein transmembrane 5 (Laptm5), mRNA [NM_010686]	0.833725	0.056719	1.11764	0.152442	3.02338	2	0	0	0	0.834916	0.776421	0.88984	1.29931	1.28876	1.091	0.945954	0.718606	0.802267	0.951906	1.25186	1.14916
5633	5818	DATA	13867	85	91	ref|NM_030712|ens|ENSMUST00000049810|ref|XM_006512401|gb|AK052901	mm|chr9:123720605-123720664	0	NA	1625	TGCTTATGTTTTACTGGAATTGTCTTGTAAAGTGCAGCAATATGGGACTGAAAACAGGCC	12862	0	A_51_P412027	Cxcr6	NM_030712	ref|Mus musculus chemokine (C-X-C motif) receptor 6 (Cxcr6), mRNA [NM_030712]	0.912519	0.375618	1.42252	0.232585	1.99942	3	0	0	0	1.07142	1.18257	0.483567	1.10414	1.55707	0.680744	0.297285	1.35536	0.000294	1.22791	1.35953	1.68011
5640	5864	DATA	13987	86	47	ref|NM_027402|ens|ENSMUST00000102600|ref|XM_006537009|ref|XM_006503212	mm|chr4:128821749-128821808	0	NA	2613	CCAAGGCTCCTTAAGGGAGGTCCTTACCTCCAATCCAGTTAGAGCAATAACCACTTTTTA	12782	0	A_52_P213696	Fndc5	NM_027402	ref|Mus musculus fibronectin type III domain containing 5 (Fndc5), mRNA [NM_027402]	0.836274	0.0279107	1.07414	0.0440547	7.89979	3	0	0	0	0.842836	0.805667	0.86032	1.09823	1.23084	1.64786	0.903886	0.792121	0.595839	1.10729	1.09097	1.02415
5644	5870	DATA	14001	86	61	ref|NM_018762|ens|ENSMUST00000032133|ref|XM_011241410|ref|XM_006506394	mm|chr6:87729650-87729709	0	NA	704	GCTGTCCAGTCTAAAGACCTGGGTTTTATCCCCAGGAGAGACCTAAATCTCACCTCCACA	12808	0	A_51_P153995	Gp9	NM_018762	ref|Mus musculus glycoprotein 9 (platelet) (Gp9), mRNA [NM_018762]	0.323294	0.0953727	1.02237	0.275659	4.15108	2	0	0	0	0.217547	0.402797	0.349538	1.53855	2.886	1.22862	0.549047	0.643744	1.11705	1.26104	1.08542	0.720647
5710	6305	DATA	15022	92	98	ref|NM_027264|ens|ENSMUST00000145622|ref|XM_006541180|ref|XM_006541182	mm|chr7:50552792-50552733	0	NA	3290	TTTACAGGTGCTGTTCTACATAACAGGTTTTACTGAGAAATGAATTCCTAGCTTATTAGC	13768	0	A_52_P613167	Zfp715	NM_027264	ref|Mus musculus zinc finger protein 715 (Zfp715), mRNA [NM_027264]	0.880352	0.170658	1.18571	0.15879	2.26891	3	0	0	0	1.00429	0.951067	0.685704	0.982514	1.27803	1.24679	0.860355	0.998641	0.435479	1.07202	1.36713	1.11798
5745	6496	DATA	15469	95	53	ref|NM_001162896|ref|XM_006496969|ref|XM_011238859|ref|XM_011238858	mm|chr1:162008377-162008436	0	NA	3693	TCTTTTTCGAAAATTTGAAAAGAAGATGCATAAAGAAGAGACCTTCTCAACTGGCATGGA	14281	0	A_52_P13783	4930523C07Rik	NM_001162896	ref|Mus musculus RIKEN cDNA 4930523C07 gene (4930523C07Rik), transcript variant 1, mRNA [NM_001162896]	1.09139	0.055594	1.01658	0.0338696	1.99042	3	0	0	0	1.15544	1.06304	1.05568	1.16273	0.912162	1.20346	1.0155	1.38207	0.000165	0.982064	1.01791	1.04976
5756	6561	DATA	15616	96	36	ref|NM_001159637|ref|NM_138671|ens|ENSMUST00000030939|ens|ENSMUST00000105613	mm|chr4:154963854-154963913	0	NA	1780	CGTATCCCCCTGAGATTCCCAGGTCAGGAATTCCCATAAATCAGTCTGTTGAAATTCTGA	14249	0	A_66_P136899	Nadk	NM_001159637	ref|Mus musculus NAD kinase (Nadk), transcript variant 1, mRNA [NM_001159637]	1.0696	0.127166	0.887285	0.0485044	2.32012	2	0	0	0	1.20205	0.948476	1.05827	1.03062	0.89304	1.30456	1.12962	0.960076	0.811438	0.839493	0.936472	0.885892
5766	6653	DATA	15845	97	101	ref|NM_175450|ens|ENSMUST00000045247|gb|AK133716|gb|AK168691	mm|chr10:79431472-79431531	0	NA	2434	CCTTGAGGACAAAGGCCACTGAAGGGTTCCATGGCAGGAAATGTCTGGAACAGTATTCGG	14656	0	A_51_P317115	Wdr18	NM_175450	ref|Mus musculus WD repeat domain 18 (Wdr18), mRNA [NM_175450]	1.19309	0.49683	0.733824	0.0185564	1.59999	2	0	0	0	1.75982	0.986917	0.832544	0.590664	1.17823	1.77746	0.926138	1.7465	0.000248	0.739672	0.748753	0.713049
5767	6654	DATA	15848	97	104	ref|NM_013712|ens|ENSMUST00000033674|gb|AK003906|gb|BC030035	mm|chrX:98647915-98648214	0	NA	808	AGTCAAACTGAGCTTCATGTCCACATTGTCTTTGATGGTAACCGTGTGTTCCAAGCACAG	14662	0	A_52_P298088	Itgb1bp2	NM_013712	ref|Mus musculus integrin beta 1 binding protein 2 (Itgb1bp2), mRNA [NM_013712]	0.932964	0.104533	1.05557	0.0314076	1.94559	2	0	0	0	1.02195	0.959096	0.817845	1.05967	1.06475	1.32465	0.977459	1.07422	0.533647	1.02746	1.04978	1.08947
5789	6791	DATA	16176	99	104	ref|NM_007872|ref|NM_001271753|ref|NM_153743|ens|ENSMUST00000174817	mm|chr12:3908227-3908286	0	NA	3518	CTATATATCTCTTTGGTTGTCTCTAGCCTGATCAGATAGGAGCACAAACAGGAAGAGAAT	14963	0	A_52_P169048	Dnmt3a	NM_007872	ref|Mus musculus DNA methyltransferase 3A (Dnmt3a), transcript variant 1, mRNA [NM_007872]	0.778423	0.138707	1.20313	0.251366	2.56224	3	0	0	0	0.623432	0.890891	0.820945	1.08511	1.35725	2.36842	0.000417	1.24374	0.000417	1.1639	0.973679	1.4718
5794	6831	DATA	16275	100	39	ref|NM_008854|ref|NM_001277898|ens|ENSMUST00000005606|ens|ENSMUST00000120823	mm|chr8:86518744-86518802	0	NA	1024	CCTTCTGCAGGTGGATCTCACCAAGCGCCTTTGGGAACCTCAAGAACGGGGTCAATGACA	14846	0	A_55_P2739831	Prkaca	NM_008854	ref|Mus musculus protein kinase, cAMP dependent, catalytic, alpha (Prkaca), transcript variant 1, mRNA [NM_008854]	0.840584	0.12389	1.15528	0.101975	3.39686	3	0	0	0	0.838333	0.965584	0.717834	1.26567	1.16668	1.11194	0.979402	0.81585	0.67287	1.19494	1.23146	1.03943
5804	6913	DATA	16475	101	75	ref|NM_007444|ref|NM_009665|ens|ENSMUST00000072796|ens|ENSMUST00000080898	mm|chr10:40021887-40021828	0	NA	105	AGACTCACGTTCAACTTTCGCTCACGAAAATAGCCGGGAAAATTTTATTAGTCCTTTTTT	15206	0	A_55_P2762075	Amd2	NM_007444	ref|Mus musculus S-adenosylmethionine decarboxylase 2 (Amd2), mRNA [NM_007444]	0.812424	0.112041	1.24491	0.24216	2.80742	2	0	0	0	0.935562	0.716489	0.78522	1.02219	1.05456	1.35057	0.944681	0.780091	0.675912	1.36322	1.40517	0.966337
5822	7031	DATA	16737	103	9	ref|NM_025651|ref|NM_001164828|ens|ENSMUST00000177402|ens|ENSMUST00000137208	mm|chr9:105307599-105307658	0	NA	2265	GCCTGAAAGCTTGGAGGAGCATGTAGAGAACTCAGAGCTTGAATAAACAGTCTGTAGTAC	15383	0	A_55_P2482803	Aste1	NM_025651	ref|Mus musculus asteroid homolog 1 (Drosophila) (Aste1), transcript variant 1, mRNA [NM_025651]	0.819122	0.124243	1.12575	0.171316	2.50959	3	0	0	0	0.951598	0.80057	0.705198	1.32543	1.25885	1.13028	0.875941	0.987826	0.587056	0.969826	1.09828	1.30914
5824	7045	DATA	16774	103	46	ref|NM_033146|ens|ENSMUST00000022828|ens|ENSMUST00000173169|ref|XM_006519739	mm|chr14:56200439-56200380	0	NA	726	AATCACTCAATGGAGTGGTTCCACAGATGGAAATGCCTAAGTCAGAAGGGTCCACATACA	15451	0	A_51_P272147	Emc9	NM_033146	ref|Mus musculus ER membrane protein complex subunit 9 (Emc9), mRNA [NM_033146]	0.849901	0.158897	1.14075	0.0638876	2.94152	2	0	0	0	0.999963	0.866299	0.683442	1.22292	1.24943	1.11391	0.956358	0.963918	0.52151	1.19761	1.15302	1.07162
5828	7062	DATA	16820	103	92	ref|NM_030702|ref|NM_001163571|ens|ENSMUST00000005336|ens|ENSMUST00000123084	mm|chr11:69486679-69486620	0	NA	2374	TATATAAATATATATAAAAATGCCACGGTCCTGCTCTGGTCAATAAAGGATCCTTTGAAG	15535	0	A_55_P2070054	Senp3	NM_030702	ref|Mus musculus SUMO/sentrin specific peptidase 3 (Senp3), transcript variant 1, mRNA [NM_030702]	0.979337	0.0161081	1.05747	0.0395536	3.16857	2	0	0	0	0.997937	0.970088	0.969986	1.0195	1.05418	1.06268	0.905685	0.934486	0.913064	1.08267	1.07785	1.01188
5834	7095	DATA	16895	104	3	ref|NM_153762|ens|ENSMUST00000056328|gb|AK033164|gb|AK157821	mm|chr9:43919158-43919099	0	NA	1976	CTGGAGTCAGGAGTTTATCCCTGAGTACAGGGGTGCAGCTACACCTGGCTTTGGGACCAT	15374	0	A_51_P201607	Rnf26	NM_153762	ref|Mus musculus ring finger protein 26 (Rnf26), mRNA [NM_153762]	1.14322	0.112473	0.959752	0.0862011	2.24247	3	0	0	0	1.16443	1.02165	1.24358	1.10593	0.984523	1.58572	1.10593	0.908837	0.000143	1.01174	0.860249	1.00727
5845	7227	DATA	17201	105	145	ref|NM_019694|ens|ENSMUST00000149886|gb|AK161638|gb|AK215386	mm|chr5:34086337-34085249	0	NA	2172	TGGATGATAATAAGGACGGCAATATCAACATCGATGACCTTGTCAAGGTAATCGACTTGG	15929	0	A_65_P11059	Letm1	NM_019694	ref|Mus musculus leucine zipper-EF-hand containing transmembrane protein 1 (Letm1), mRNA [NM_019694]	0.939069	0.0735308	1.03999	0.0151528	2.32831	2	0	0	0	0.932257	0.869181	1.01577	1.14318	1.10445	1.01791	0.927211	1.01451	0.855557	1.05235	1.04453	1.02309
5861	7334	DATA	17484	107	100	ref|NM_133977|ens|ENSMUST00000035158|gb|AK168368|gb|AK085754	mm|chr9:103111266-103111207	0	NA	2271	TCTTCGCTGCTGTGCCTTACCACATACACAGAGCACAAAATAAAAACGACTGCTGACTTT	16142	0	A_55_P2037584	Trf	NM_133977	ref|Mus musculus transferrin (Trf), mRNA [NM_133977]	0.809909	0.0857721	1.06672	0.108039	3.22449	3	0	0	0	0.877735	0.838499	0.713494	1.09955	1.21881	1.90001	0.897055	0.856269	0.398415	0.942134	1.12341	1.13462
5904	7645	DATA	18275	112	71	ens|ENSMUST00000135671|ref|XM_006506529|gb|AK010642|gb|AK007495	mm|chr6:39548336-39549425	0	NA	355	CTGACACTGTAAACTCTCTGGACGAGAGCAAGGTGAGACATTTCAAGAAATTACAGACTT	16674	0	A_65_P13910	Ndufb2	ENSMUST00000135671	ens|NADH dehydrogenase (ubiquinone) 1 beta subcomplex, 2 [Source:MGI Symbol;Acc:MGI:1915448] [ENSMUST00000135671]	0.909287	0.132933	1.0638	0.0299126	1.96405	2	0	0	0	1.02984	0.931293	0.766725	1.06175	1.09633	1.22098	1.16455	0.987092	0.550052	1.07527	1.08627	1.02984
5924	7790	DATA	18630	114	98	ref|NM_199025|ens|ENSMUST00000067043|gb|AK079762|gb|AK173205	mm|chr2:37287768-37287709	0	NA	5186	CTAAATCTGTTGTATGTTAGACATACTTGAACTACCTCTTTACTTAATGGGGAAGTTTCC	17024	0	A_52_P488919	Zbtb26	NM_199025	ref|Mus musculus zinc finger and BTB domain containing 26 (Zbtb26), mRNA [NM_199025]	0.857804	0.324213	1.22767	0.0743682	1.92595	2	0	0	0	1.14748	0.918337	0.507591	1.07251	1.36325	1.56302	0.808987	0.935679	0.000124	1.30541	1.2204	1.15721
5925	7791	DATA	18632	114	100	ref|NM_007658|ens|ENSMUST00000094324|ref|XM_006511929|ref|XM_006511930	mm|chr9:109796280-109796339	0	NA	3512	TTGTAGAGATTCTGTTAGCTGAATGCTTTCCAGGAGAATGGCTTGCAGATTGTACCAGCA	17028	0	A_55_P2724630	Cdc25a	NM_007658	ref|Mus musculus cell division cycle 25A (Cdc25a), mRNA [NM_007658]	0.87068	0.216361	1.11492	0.0696123	1.86128	2	0	0	0	0.990956	1.00018	0.620904	1.00652	1.16722	1.4507	0.974817	1.08549	0.358455	1.07188	1.07765	1.19523
5942	7895	DATA	18876	116	16	ens|ENSMUST00000122068|ens|ENSMUST00000181063|nap|NAP057964-1	mm|chr11:4464498-4464557	0	NA	863	CCTTCGATGCTGGGGCTGGCATTGACCTCACAATTTCCATCCCAGACCCCCATAACAGGA	17173	0	A_55_P2048221	ENSMUST00000122068	ENSMUST00000122068	ens|predicted gene 11960 [Source:MGI Symbol;Acc:MGI:3652301] [ENSMUST00000122068]	0.919676	0.0763297	1.1235	0.131741	2.3187	3	0	0	0	0.9811	0.943705	0.834223	1.11221	1.1287	0.941452	1.03697	1.06869	0.58246	1.03616	1.05931	1.27503
6026	8464	DATA	20174	124	2	ref|NM_023142|ens|ENSMUST00000144375|gb|AK002274|gb|AK005378	mm|chr5:145888791-145888850	0	NA	1286	GAGGCTAAGGGCTGCTTTGCTAAATGTTTCTAGGATGCAGTACACTGCTACAAAGGAAGA	18324	0	A_51_P331279	Arpc1b	NM_023142	ref|Mus musculus actin related protein 2/3 complex, subunit 1B (Arpc1b), mRNA [NM_023142]	0.91763	0.0464106	1.02436	0.0670205	2.2677	3	0	0	0	0.878881	0.904945	0.969064	1.21113	1.05469	1.34784	0.946461	0.810725	0.803171	0.978982	0.992763	1.10134
6039	8543	DATA	20350	125	14	ens|ENSMUST00000136976|ens|ENSMUST00000013737|ens|ENSMUST00000150108|ens|ENSMUST00000138069	mm|chr1:173165043-173164984	0	NA	1785	TGCATGAACTAGAAAAGGAGACATTATATTAAATTAGCCACCTTTTGGCCCCTAAGCTCA	18643	0	A_55_P2106063	Ndufs2	ENSMUST00000136976	ens|NADH dehydrogenase (ubiquinone) Fe-S protein 2 [Source:MGI Symbol;Acc:MGI:2385112] [ENSMUST00000136976]	0.928682	0.0788816	1.11682	0.0204691	3.99874	2	0	0	0	1.01338	0.915353	0.857313	1.0183	1.16258	0.93639	1.01756	1.07022	0.658427	1.12617	1.09335	1.13095
6047	8581	DATA	20439	125	103	ref|NM_001005767|ens|ENSMUST00000120117|ens|ENSMUST00000123070|ens|ENSMUST00000155832	mm|chr16:20282886-20282827	0	NA	966	AAGCCATCATTGCCATGGATACAGCTGGGATGATCCTGGGATGGAAATGTTTTGATCATG	18805	0	A_55_P2130877	Parl	NM_001005767	ref|Mus musculus presenilin associated, rhomboid-like (Parl), mRNA [NM_001005767]	1.04263	0.0935028	0.956358	0.0244745	1.54602	2	0	0	0	1.15034	0.982345	0.995202	0.910851	0.984775	1.40833	0.940483	1.15175	0.606842	0.928097	0.970508	0.970469
6054	8639	DATA	20569	126	69	ref|NM_021433|gb|AK198164|gb|AK019106|gb|AK151549	mm|chr1:157050297-157050356	0	NA	2108	ACCTCAGATGTGCTCATGAATGTGGGATTTCTTATAATGTCCCAAATGCATAGCCTGGTA	18745	0	A_52_P214891	Stx6	NM_021433	ref|Mus musculus syntaxin 6 (Stx6), mRNA [NM_021433]	0.952616	0.098486	1.03843	0.0275398	1.45338	2	0	0	0	1.00948	1.00948	0.838894	0.998961	1.00519	1.32883	0.960016	0.964689	0.769181	1.01688	1.02895	1.06945
6057	8649	DATA	20591	126	91	ref|NM_145216|ens|ENSMUST00000037218|ref|XM_006514875|gb|BC107200	mm|chr11:4960167-4960226	0	NA	888	GGACAGGTCAGTTTTACCTGAGACCTTATTGGGTCATAAGCACAGATGGAAAGGACTTGA	18785	0	A_51_P302942	Rasl10a	NM_145216	ref|Mus musculus RAS-like, family 10, member A (Rasl10a), mRNA [NM_145216]	0.466085	0.191852	1.55481	0.279304	5.56511	3	0	0	0	0.405118	0.312125	0.681012	1.53231	1.86215	1.75547	0.27274	0.514483	0.000161	1.23387	1.6877	1.74285
6066	8723	DATA	20765	127	101	ref|NM_023868|ens|ENSMUST00000021750|ens|ENSMUST00000170156|ref|XM_011244297	mm|chr13:11793104-11792652	0	NA	8735	ATTCAGACTCTTCTAAGATCCAACCGCTAATGAAGCCATATAAACTCTTGTCTGAAAAGG	19105	0	A_55_P2737124	Ryr2	NM_023868	ref|Mus musculus ryanodine receptor 2, cardiac (Ryr2), mRNA [NM_023868]	0.712324	0.173393	1.35504	0.181215	4.43858	3	0	0	0	0.808512	0.816302	0.512158	1.14727	1.17572	1.48744	0.690342	0.895259	0.401866	1.30943	1.55471	1.201
6092	8942	DATA	21323	131	3	ref|NM_153126|ens|ENSMUST00000133016|ens|ENSMUST00000143017|ens|ENSMUST00000137050	mm|chr2:103561496-103561437	0	NA	3775	TGGGAGAGACTATCGAGAAAGACTCTTACTACAAAAATGAGGGGAGAGAGAATATTTTTA	19511	0	A_55_P1999172	Nat10	NM_153126	ref|Mus musculus N-acetyltransferase 10 (Nat10), mRNA [NM_153126]	0.911614	0.0287573	1.07824	0.0510894	4.9229	3	0	0	0	0.879221	0.934137	0.921482	1.15471	1.05098	1.20284	0.920013	0.878826	0.823063	1.08137	1.02566	1.1277
6107	9054	DATA	21566	132	82	ref|NM_009294|ens|ENSMUST00000033075|ens|ENSMUST00000121705|ens|ENSMUST00000152310	mm|chr7:134992420-134992479	0	NA	1298	CTGCGAGACAGTTTTCAATGTCCTGTTTGTCTGGGATACATGGTTTTGTAAAAAATTTAA	19660	0	A_55_P2156741	Stx4a	NM_009294	ref|Mus musculus syntaxin 4A (placental) (Stx4a), mRNA [NM_009294]	0.922709	0.0448959	1.09761	0.0799704	3.30319	3	0	0	0	0.910481	0.885194	0.972452	1.13759	1.06862	1.17781	0.842838	0.876225	0.835952	1.11098	1.17006	1.0118
6121	9123	DATA	21717	133	69	ref|NM_177186|ens|ENSMUST00000043829|ens|ENSMUST00000105608|ref|XM_006538953	mm|chr4:154994110-154994169	0	NA	2951	AGATATTGTGAAGATGTTCTCTCATTTGACTTTGCCCAGGTTTCTAGTTCCTTCCTCTTT	19927	0	A_66_P134988	Slc35e2	NM_177186	ref|Mus musculus solute carrier family 35, member E2 (Slc35e2), mRNA [NM_177186]	0.897297	0.145773	1.14994	0.108374	2.40902	3	0	0	0	1.01174	0.733178	0.946978	1.10968	0.964159	1.94102	0.600433	0.771209	0.4718	1.02517	1.20395	1.22069
6143	9291	DATA	22152	136	12	ref|NM_025597|ens|ENSMUST00000027193|gb|AK007930|gb|AK013608	mm|chr1:58652622-58652681	0	NA	361	CCAGAATGGTGATAAGAAGCATCACTGAAGAGAGCGCCTTGTGACGTCTCTTCCATAAAA	20120	0	A_51_P160744	Ndufb3	NM_025597	ref|Mus musculus NADH dehydrogenase (ubiquinone) 1 beta subcomplex 3 (Ndufb3), mRNA [NM_025597]	0.891695	0.111863	1.13105	0.0570949	3.30097	2	0	0	0	0.98557	0.921595	0.76792	1.1998	1.16315	0.90748	1.04727	0.966446	0.647621	1.08597	1.11192	1.19525
6144	9293	DATA	22155	136	15	ref|NM_001099628|ref|XM_006515115|ref|XM_006515116|ref|XM_006515117	mm|chr12:5053983-5054042	0	NA	7868	GTATGTCTACTTTGTAGATTAAGTACACTTCATCAACTATGGTCTATTCTGGGTTTGTAG	20126	0	A_55_P2843259	Atad2b	NM_001099628	ref|Mus musculus ATPase family, AAA domain containing 2B (Atad2b), mRNA [NM_001099628]	1.05068	0.0215093	0.919445	0.141856	1.58431	2	0	0	0	1.0546	1.02749	1.06996	1.04935	0.976498	1.27498	0.883917	1.14795	0.756922	1.00273	0.755652	0.999953
6152	9327	DATA	22237	136	97	ref|NM_019684|ens|ENSMUST00000136664|ens|ENSMUST00000002081|ens|ENSMUST00000139630	mm|chrX:71024011-71024070	0	NA	1710	CCTGGCTTAATCCATAGGTTTTGCTGCAGCTGTGGACAGTAGAGACTATGCTAGCTCTTG	20269	0	A_51_P375862	Srpk3	NM_019684	ref|Mus musculus serine/arginine-rich protein specific kinase 3 (Srpk3), mRNA [NM_019684]	0.916654	0.18836	1.15758	0.0248164	2.19646	2	0	0	0	1.06895	0.97498	0.70603	1.21443	1.03814	1.23985	0.845386	0.950722	0.488765	1.1673	1.17607	1.12938
6160	9391	DATA	22395	137	91	ens|ENSMUST00000071101|gb|AK039686|tc|TC1640285|riken|A330086O21	mm|chr6:128137932-128137873	0	NA	2249	GTGCCCACATCAATTTGTGTGATTGATTGTGCTCAGTTTTCTTCTCGTTTGAGATAATCT	20555	0	A_66_P119045	ENSMUST00000071101	ENSMUST00000071101	ens|predicted gene 10010 [Source:MGI Symbol;Acc:MGI:3641978] [ENSMUST00000071101]	0.717856	0.0618221	1.21971	0.203225	4.0921	2	0	0	0	0.66081	0.783544	0.709214	1.34348	1.23613	1.3939	0.694901	0.908946	0.609933	1.13158	1.45213	1.07543
6172	9472	DATA	22577	138	109	ref|NM_178405|ens|ENSMUST00000085913|gb|BC028553|tc|TC1717045	mm|chr1:174201917-174201858	0	NA	6149	CCCTCGGAGTCTTTAAAAACATCAGTTTTCTTTGTAATGGTTAAGAATAAACCCGGATTA	20587	0	A_55_P2030373	Atp1a2	NM_178405	ref|Mus musculus ATPase, Na+/K+ transporting, alpha 2 polypeptide (Atp1a2), mRNA [NM_178405]	0.79293	0.107635	1.16982	0.031818	5.81601	2	0	0	0	0.821393	0.673924	0.883473	1.13108	1.15022	1.32082	0.836286	0.800771	0.872578	1.20459	1.14215	1.16271
6181	9541	DATA	22731	139	99	ref|NM_001199113|ref|NM_022880|ref|NM_001199115|ref|NM_001199116	mm|chr17:45722230-45722171	0	NA	2012	CATTTTACTGCCTTTTTTATACTGACAGAAACCAGGTGCCTTCAGAGGCCATCTGATTAA	20866	0	A_55_P2038737	Slc29a1	NM_001199113	ref|Mus musculus solute carrier family 29 (nucleoside transporters), member 1 (Slc29a1), transcript variant 1, mRNA [NM_001199113]	0.962025	0.106324	1.11862	0.0169425	2.51926	2	0	0	0	1.07028	0.958058	0.857739	1.00647	1.03109	1.16813	0.979804	1.07643	0.496118	1.10843	1.13818	1.10926
6190	9606	DATA	22861	140	65	ref|NM_013812|ens|ENSMUST00000031341|gb|AK004852|gb|BC006910	mm|chr11:48638938-48638879	0	NA	1170	CACAACATCTGGAAGAAAGCGACTGAAACTGTTGCATCTTTGTATTTATTACTTGATGTA	20806	0	A_55_P2048563	Cdk2ap1	NM_013812	ref|Mus musculus CDK2 (cyclin-dependent kinase 2)-associated protein 1 (Cdk2ap1), mRNA [NM_013812]	0.918081	0.095062	1.15493	0.0124224	4.27901	2	0	0	0	0.824549	0.915092	1.0146	1.08243	0.829597	1.27055	1.01552	0.78975	0.793133	1.1632	1.16094	1.14064
6212	9832	DATA	23380	143	92	ens|ENSMUST00000182678|nap|NAP063054-1	mm|chr8:100089587-100089528	0	NA	905	AAAGGTAGTTTCCTGGTATGACAATGAATACAGCTACAGCAACAGGGTGGTGGACCTCAT	21441	0	A_55_P2167005	ENSMUST00000182678	ENSMUST00000182678	ens|predicted gene 7191 [Source:MGI Symbol;Acc:MGI:3779693] [ENSMUST00000182678]	0.895194	0.0888098	1.14634	0.135172	2.68956	3	0	0	0	0.984557	0.894077	0.806948	1.0489	1.12017	0.984557	1.03974	1.11346	0.568572	1.08073	1.05649	1.3018
6260	10250	DATA	24371	149	99	ref|NM_026884|ref|NM_001146347|ref|NM_029978|ens|ENSMUST00000079423	mm|chr7:133973476-133973535	0	NA	1636	ATTTATTCACCCATATCAAACTAATTTGTTGGGGTGAGGGGAGGAAGGCAGTTGCTCCCC	22347	0	A_51_P179697	Fam57b	NM_026884	ref|Mus musculus family with sequence similarity 57, member B (Fam57b), transcript variant 2, mRNA [NM_026884]	0.986675	0.10143	1.16251	0.0624527	2.55686	3	0	0	0	1.09193	0.97854	0.889558	1.46922	1.2203	1.09795	0.560562	0.7841	0.420308	1.09872	1.22354	1.16527
6267	10312	DATA	24503	150	67	ref|NM_011652|ref|NM_028004|ens|ENSMUST00000111882|ens|ENSMUST00000099981	mm|chr2:76542714-76542655	0	NA	101000	GATGTTTAAGTATGCCTCAGTGGGTTGAGAAATTCCCCACTGAAGATTTCCTATCCACCT	22288	0	A_55_P2797193	Ttn	NM_011652	ref|Mus musculus titin (Ttn), transcript variant N2-A, mRNA [NM_011652]	0.947875	0.039999	1.05793	0.0107575	4.6022	2	0	0	0	0.964431	0.976937	0.902256	1.04447	1.09361	1.12916	0.993732	0.953711	0.7679	1.06127	1.06663	1.0459
6276	10407	DATA	24737	151	137	ref|NM_183408|ref|NM_019798|ens|ENSMUST00000039413|ref|XM_006510092	mm|chr9:21017591-21017650	0	NA	4551	TTGATCAATTGGTCCGTCGATTGACAATCAGTCCTCCAGTCTTGTCCCTGATTAAAGCGA	22705	0	A_55_P2029191	Pde4a	NM_183408	ref|Mus musculus phosphodiesterase 4A, cAMP specific (Pde4a), transcript variant 5, mRNA [NM_183408]	0.923348	0.0529847	1.03205	0.0801113	1.96019	3	0	0	0	0.878618	0.909562	0.981863	1.14521	1.06666	1.06145	0.961184	0.92786	0.971449	1.12453	0.984094	0.987516
6285	10491	DATA	24931	153	3	gb|AK085813|tc|TC1613574|riken|D830013H20	mm|chrX:106300571-106300630	0	NA	3033	GGCTACCAATTGGAAATTTGTGGTTGGTATTCAGAAATGTAATATTAGAGTTGAGAAGAG	22757	0	A_51_P333309	AK085813	AK085813	gb|Mus musculus 16 days neonate heart cDNA, RIKEN full-length enriched library, clone:D830013H20 product:unclassifiable, full insert sequence. [AK085813]	0.918489	0.136685	1.20688	0.196941	2.08366	3	0	0	0	0.76606	0.959252	1.03016	1.76358	1.4815	1.21618	0.000366	1.1619	0.000366	1.43331	1.07544	1.11188
6293	10595	DATA	25142	154	50	ref|NM_021365|ref|NM_001293680|ref|NM_001293676|ref|NM_001293679	mm|chrX:70467736-70467792	0	NA	1263	CCCTGGGAAATCCTTACTTGGGAACGTTTGATTTAATAAACATGAAATAGTTTCAGACTT	22837	0	A_51_P457244	Xlr4b	NM_021365	ref|Mus musculus X-linked lymphocyte-regulated 4B (Xlr4b), transcript variant 1, mRNA [NM_021365]	0.650725	0.0184337	1.50016	0.578335	2.54267	2	0	0	0	0.64078	0.639398	0.671995	1.04557	1.44683	1.29219	0.645308	0.594507	0.522951	1.86525	0.833357	1.80187
6309	10677	DATA	25356	155	100	gb|AK148448|riken|C820001M24	mm|chr9:21734254-21734313	0	NA	768	GCTTGCATCTTCTGAATGCTAGGATTCTAGGATGGAGACATTATGTCTTTGTGGGTTGTT	23219	0	A_55_P2736210	Ccdc159	AK148448	gb|Mus musculus adult pancreas islet cells cDNA, RIKEN full-length enriched library, clone:C820001M24 product:hypothetical protein, full insert sequence. [AK148448]	0.601598	0.190499	1.31689	0.266586	3.7812	3	0	0	0	0.748955	0.669356	0.386483	1.33353	1.34841	1.67109	0.97147	0.919829	0.000197	1.04515	1.32753	1.578
6318	10731	DATA	25488	156	68	ref|XM_006513538|ref|XM_006513539|tc|TC1641932	mm|chr10:114868938-114868997	0	NA	6224	CCTGTCTTTTACAGCAACTCTTGTTTGAAGCATCAGAAGGAGGTAAAACTGATAACCTGA	23162	0	A_55_P2523429	Zfc3h1	XM_006513538	ref|PREDICTED: Mus musculus zinc finger, C3H1-type containing (Zfc3h1), transcript variant X1, mRNA [XM_006513538]	0.822203	0.243784	1.48847	0.107245	4.33297	2	0	0	0	0.859528	1.04517	0.561909	1.5077	1.05218	0.960631	0.571562	0.975669	0.000244	1.47194	1.60302	1.39045
6319	10742	DATA	25515	156	95	ref|NM_001103179|ref|NM_145125|ens|ENSMUST00000131322|ens|ENSMUST00000023631	mm|chr16:96226216-96226157	0	NA	4990	TGAAAAATAGAAAATGTGGAAGTAGCCGGAAAGTTCTGCGGAAGTGTGCTGCTGTTGCTG	23211	0	A_55_P2927917	Brwd1	NM_001103179	ref|Mus musculus bromodomain and WD repeat domain containing 1 (Brwd1), transcript variant 2, mRNA [NM_001103179]	0.956315	0.0829641	1.12675	0.0595242	2.89114	3	0	0	0	0.890228	1.04942	0.929296	1.13498	0.937694	1.25649	0.929347	0.817006	0.675275	1.12182	1.06985	1.18859
6343	10843	DATA	25747	157	163	ref|NM_172857|ref|XM_006499492|ref|XR_374466|gb|AK030132	mm|chr2:119345264-119345205	0	NA	3018	CAGGTGATGTCACTGTAGAGGGTATTTGCTCAACTTTCTTTATATTGCATTAATCTTAAG	23621	0	A_51_P131281	Exd1	NM_172857	ref|Mus musculus exonuclease 3'-5' domain containing 1 (Exd1), mRNA [NM_172857]	0.611787	0.161855	1.16528	0.0962574	5.09078	3	0	0	0	0.760986	0.634665	0.439711	2.16812	1.11392	2.07319	0.000459	0.914485	0.398637	1.12751	1.27469	1.09363
6346	10878	DATA	25849	158	101	ref|NM_009409|ens|ENSMUST00000017629|gb|AK087535|gb|D38046	mm|chr14:17239303-17239634	0	NA	2402	CGCATTTTGTTTAGATATGCTGGACCTGAAGATGATGCTGCCATCACCTTGGCATTTAGT	23510	0	A_55_P2733402	Top2b	NM_009409	ref|Mus musculus topoisomerase (DNA) II beta (Top2b), mRNA [NM_009409]	0.850585	0.175459	1.16633	0.158292	2.31426	3	0	0	0	0.908012	0.990135	0.653608	1.02549	0.99351	1.448	1.00412	0.971653	0.506494	1.11115	1.34482	1.04301
6350	10903	DATA	25901	158	153	ref|NM_001162946|ref|NM_008797|ens|ENSMUST00000068004|ens|ENSMUST00000113825	mm|chr19:4621610-4621669	0	NA	4005	AGAGGGAAGACCTAATTCACAGGTCCTGGGAAATTTGCTCAATAAAAGTGGCCTTCCCTT	23603	0	A_55_P2008599	Pcx	NM_001162946	ref|Mus musculus pyruvate carboxylase (Pcx), transcript variant 1, mRNA [NM_001162946]	0.866934	0.1165	1.10501	0.0577437	3.17134	2	0	0	0	0.806931	0.792666	1.0012	1.17288	1.13273	1.14459	0.911292	1.01009	0.712608	1.14733	1.12847	1.03923
6352	10943	DATA	26004	159	92	ref|NM_182997|ens|ENSMUST00000152731|ens|ENSMUST00000132719|ens|ENSMUST00000045743	mm|chr3:97476843-97476902	0	NA	4113	CAGACTCCAGTTACTCATGAATATGAGACCAGGAAGAAATAAGGGTCTTTCAGGACTCTG	23790	0	A_52_P126266	Prkab2	NM_182997	ref|Mus musculus protein kinase, AMP-activated, beta 2 non-catalytic subunit (Prkab2), mRNA [NM_182997]	0.849956	0.136049	1.23337	0.109693	3.79993	3	0	0	0	0.932357	0.924587	0.692924	1.21837	1.11035	0.936713	1.02753	0.979291	0.477788	1.1849	1.15625	1.35894
6359	10999	DATA	26131	160	55	ref|NM_001008791|ref|NM_001008792|ref|NM_028640|ref|NM_001008793	mm|chr4:63076038-63075979	0	NA	3994	TATCCCAGAGGCCTTGCAGGCGACCAGCAATGTCAGTGTATTTATATACAGAGCTTATGA	23721	0	A_51_P303620	Whrn	NM_001008791	ref|Mus musculus whirlin (Whrn), transcript variant 2, mRNA [NM_001008791]	0.810795	0.0554944	1.24473	0.116458	5.82614	2	0	0	0	0.852357	0.832251	0.747775	1.19225	1.0125	0.929337	0.845359	0.901238	0.952747	1.18344	1.17172	1.37903
6362	11018	DATA	26175	160	99	ref|NM_145215|ref|NM_001190437|ref|NR_033794|ens|ENSMUST00000148831	mm|chr5:135487765-135487824	0	NA	1212	ACCACTCAGAGATTAGGCGACTCTTCCCTCAAGCCCAGATTCAGACCGTGCCTAACGCTG	23804	0	A_52_P560620	Abhd11	NM_145215	ref|Mus musculus abhydrolase domain containing 11 (Abhd11), transcript variant 1, mRNA [NM_145215]	0.89323	0.0189636	1.04911	0.0121912	11.9764	3	0	0	0	0.907544	0.900423	0.871722	1.11078	0.991904	1.53897	0.928035	1.01784	0.585435	1.05047	1.06057	1.0363
6376	11124	DATA	26440	162	36	ref|NM_013847|ens|ENSMUST00000006544|gb|AK007395|gb|BC024107	mm|chr15:78867788-78867847	0	NA	1374	TCAGCCCAGATCAGAGGCTGTGACTCAACCCAGACTTCTAGAGCCTGGTTGAAAATGGGC	23980	0	A_51_P159402	Gcat	NM_013847	ref|Mus musculus glycine C-acetyltransferase (2-amino-3-ketobutyrate-coenzyme A ligase) (Gcat), transcript variant 1, mRNA [NM_013847]	0.909765	0.0871688	1.09091	0.0700396	2.80579	3	0	0	0	0.964485	0.809243	0.955568	0.984879	1.24302	1.06583	1.12314	0.991005	0.590105	1.14578	1.01202	1.11492
6387	11245	DATA	26778	164	46	ref|NM_175105|ens|ENSMUST00000084986|ref|XM_011241879|gb|AK075757	mm|chr7:104874948-104874889	0	NA	1262	CTCGAGTGATGTATTAAATGCTGCTAGAAAAGGCTCATTCATTAAACATCTACCTATCCC	24293	0	A_55_P1995507	Aqp11	NM_175105	ref|Mus musculus aquaporin 11 (Aqp11), mRNA [NM_175105]	0.718402	0.0858677	1.31343	0.236965	4.08908	2	0	0	0	0.817414	0.664343	0.673448	1.0283	0.982235	1.41647	0.898968	1.57833	0.000187	1.11904	1.24386	1.5774
6418	11548	DATA	27603	169	51	ref|NM_001197046|ref|NM_201230|ens|ENSMUST00000024636|ens|ENSMUST00000097419	mm|chr17:8389274-8389333	0	NA	3092	GACAGGTTCTGCATGTAATAAATGTCTCTTTGAACAGTGGATTAAAATGTTGGCCGGCAG	25185	0	A_55_P2044104	Fgfr1op	NM_001197046	ref|Mus musculus Fgfr1 oncogene partner (Fgfr1op), transcript variant 1, mRNA [NM_001197046]	0.845879	0.112657	1.21617	0.0449725	5.28728	2	0	0	0	0.974909	0.76704	0.795688	1.14992	0.877721	1.18278	0.918444	0.962638	0.722357	1.22096	1.25855	1.16899
6422	11568	DATA	27651	169	99	ref|NM_001252292|ref|NM_008590|ref|NM_001252293|ens|ENSMUST00000163949	mm|chr6:30697385-30697444	0	NA	1584	CCTCTCATTTCTGTGACATCTGACCAAATAAATAGAGCTGCTGTTGTTTTGTGTTATTAG	25271	0	A_55_P2090025	Mest	NM_001252292	ref|Mus musculus mesoderm specific transcript (Mest), transcript variant 1, mRNA [NM_001252292]	0.885719	0.0397863	1.15288	0.109951	3.95738	2	0	0	0	0.865475	0.860126	0.931557	1.27971	0.9921	1.83442	0.809275	0.968562	0.000151	1.07089	1.27782	1.10991
6423	11575	DATA	27670	169	118	ref|NM_011276|ens|ENSMUST00000121153|ens|ENSMUST00000070705|ref|XM_006527920	mm|chrX:101152599-101152540	0	NA	7341	TATTAATAGCTATCTTTTAGGAAGAAGCTTTTTCCCTATGTACGATGTCATACTGCAGAC	25309	0	A_51_P363668	Rlim	NM_011276	ref|Mus musculus ring finger protein, LIM domain interacting (Rlim), mRNA [NM_011276]	1.11996	0.143366	0.916356	0.0535345	2.30433	2	0	0	0	1.28549	1.03533	1.03905	0.817515	1.12204	1.23957	1.07871	1.17325	0.459972	0.957692	0.855883	0.935494
6428	11612	DATA	27757	170	41	ref|XM_011246737|ref|XM_011246736|ref|XM_011246738|ref|XM_011246739	mm|chr17:14238944-14238885	0	NA	2519	CCAGCTCTGACACTAGTTTGGCATGGGGAAGGTCCAATTCTTCAGGTCCCTGGCTCTCAG	25168	0	A_51_P252230	4930488N24Rik	XM_011246737	ref|PREDICTED: Mus musculus RIKEN cDNA 4930488N24 gene (4930488N24Rik), transcript variant X4, mRNA [XM_011246737]	1.12581	0.246431	0.780997	0.144131	2.09199	3	0	0	0	1.3954	0.912148	1.06988	0.763451	1.44059	1.38594	1.22348	0.848404	0.617708	0.814257	0.90559	0.623143
6453	11769	DATA	28143	172	99	ref|NM_146159|ens|ENSMUST00000060049|gb|AK161756|gb|BC023882	mm|chr5:34506220-34496745	0	NA	1694	TTGTGATGCTTTGTATCGTGGAGGGAATCAGCTATTGCTTTGTGATCAGGAGTTAAAGGA	25569	0	A_51_P392546	Haus3	NM_146159	ref|Mus musculus HAUS augmin-like complex, subunit 3 (Haus3), mRNA [NM_146159]	0.91085	0.0843483	1.11509	0.053186	3.54755	3	0	0	0	0.934898	0.980564	0.81709	1.16841	0.930695	1.50727	0.73122	0.963754	0.620837	1.05369	1.14684	1.14474
6457	11799	DATA	28207	172	163	ref|NM_009003|ens|ENSMUST00000117702|ens|ENSMUST00000118535|ref|XM_006530773	mm|chr8:126356738-126356797	0	NA	620	GAGAACGTCGAAGAGGCTTTCATGCAGTGTGCAAGGAAAATACTTAACAAAATTGAATCA	25682	0	A_55_P2148641	Rab4a	NM_009003	ref|Mus musculus RAB4A, member RAS oncogene family (Rab4a), mRNA [NM_009003]	0.817621	0.125477	1.11017	0.166572	2.42975	3	0	0	0	0.675059	0.911293	0.866511	1.04647	1.41504	1.43423	0.711548	0.730267	0.879069	1.29159	0.964132	1.07479
6473	11930	DATA	28534	174	162	ref|NM_001293791|ref|NM_001293792|ref|NM_027590|ens|ENSMUST00000034328	mm|chr8:71351406-71351465	0	NA	2375	CAAGTTCTAACTCCCTTAGTTGCTTAAAAGTCAATCCGAAGAGTATAGGAAGTTATTTCT	25971	0	A_55_P2076927	Ints10	NM_001293791	ref|Mus musculus integrator complex subunit 10 (Ints10), transcript variant 1, mRNA [NM_001293791]	0.88814	0.0558616	1.09113	0.129815	2.48787	2	0	0	0	0.909955	0.824662	0.929802	1.26846	1.09687	1.16985	0.802177	0.855438	0.869381	1.21872	0.959196	1.09549
6474	11937	DATA	28550	175	14	ref|NM_175311|ref|NM_001177901|ens|ENSMUST00000114590|ens|ENSMUST00000031562	mm|chr5:31501419-31501360	0	NA	2162	GAGCTGCCCAGCCTTTTACTGTTTTAACTTATTTCAGTGCTTTATAATAAAGGAAACACT	26000	0	A_55_P2077535	Zfp513	NM_175311	ref|Mus musculus zinc finger protein 513 (Zfp513), transcript variant 1, mRNA [NM_175311]	0.909422	0.126235	1.08707	0.0485788	2.27486	2	0	0	0	1.02875	0.922247	0.777265	1.03103	1.04747	1.25961	0.823435	0.932624	0.916359	1.04828	1.07137	1.14156
6488	12040	DATA	28795	176	95	ref|NM_016665|ens|ENSMUST00000106154|ens|ENSMUST00000128543|ens|ENSMUST00000106155	mm|chr11:120572315-120572256	0	NA	575	CCCTGAGCTGTAAATTTGTTCTTACAAAGCAACATCAATAAATCAACACCATCTCTCTGA	26151	0	A_55_P1967138	Stra13	NM_016665	ref|Mus musculus stimulated by retinoic acid 13 (Stra13), mRNA [NM_016665]	0.873971	0.287004	1.17394	0.0201972	1.80585	2	0	0	0	0.984452	1.08932	0.548144	1.10442	0.968853	1.1785	1.04952	1.13696	0.418007	1.15409	1.19447	1.17327
6493	12072	DATA	28872	177	8	ens|ENSMUST00000145102|gb|AK013339|tc|NP743528|tc|TC1705852	mm|chr4:45826301-45826242	0	NA	324	ACTCCTCAGTTCCGGGTGACCTCCTGTGACGAACGTGGTACATTCACATCCAAAGCCATT	26287	0	A_66_P130733	Igfbpl1	ENSMUST00000145102	ens|insulin-like growth factor binding protein-like 1 [Source:MGI Symbol;Acc:MGI:1933198] [ENSMUST00000145102]	1.20691	0.329191	0.763827	0.145692	2.13185	2	0	0	0	1.13765	1.56522	0.917864	0.597218	1.30744	1.42231	0.954856	0.978843	0.827118	0.755446	0.622506	0.913529
6525	12365	DATA	29625	181	105	ref|NM_001081176|ens|ENSMUST00000161093|ens|ENSMUST00000161920|ens|ENSMUST00000048993	mm|chr13:81833706-81833647	0	NA	376	AGTTGAGGGAAACAGTGAAACGATTGCCGTACTTTATTGAACCACCCGAAGAAAAACAAG	27042	0	A_52_P405090	Polr3g	NM_001081176	ref|Mus musculus polymerase (RNA) III (DNA directed) polypeptide G (Polr3g), mRNA [NM_001081176]	0.806385	0.109775	1.15761	0.0255987	5.39691	2	0	0	0	0.928726	0.773938	0.71649	1.25023	1.05828	1.63038	0.858662	0.768142	0.542302	1.14216	1.18716	1.14352
6570	12680	DATA	30435	186	95	ref|NM_177646|ens|ENSMUST00000027517|ref|XM_006529472|gb|BC048957	mm|chr1:89840990-89841049	0	NA	5619	TGTACATAGTCTGCATCAGAGAGTTGTAAATAAGTTCTTCTGTGTATAATAAAACAGGCC	27619	0	A_52_P582858	Dgkd	NM_177646	ref|Mus musculus diacylglycerol kinase, delta (Dgkd), mRNA [NM_177646]	0.832388	0.241257	1.19097	0.117713	2.31367	2	0	0	0	0.987645	0.955075	0.554444	1.26515	1.12499	1.10315	0.818958	1.07331	0.544372	1.10202	1.14645	1.32445
6590	12931	DATA	31129	190	133	ref|NM_013709|ref|NM_001289480|ref|NR_110343|ens|ENSMUST00000142693	mm|chr12:31644747-31644806	0	NA	1468	CAGGAGACAGAATCATAGTTATATCAAAGACCGACTCAAATTTTGATTGGTGGGAAGGAA	28265	0	A_51_P340226	Sh3yl1	NM_013709	ref|Mus musculus Sh3 domain YSC-like 1 (Sh3yl1), transcript variant 1, mRNA [NM_013709]	0.879609	0.192057	1.08085	0.0379609	1.78047	2	0	0	0	1.02137	0.661034	0.956423	0.983276	1.21684	0.927071	1.18156	1.48631	0.323554	1.05384	1.12426	1.06446
6635	13309	DATA	32083	196	103	ens|ENSMUST00000032508|ens|ENSMUST00000139448|gb|AK197994|gb|X17069	mm|chr6:128380178-128380121	0	NA	2159	TGAAGGTCCAGGCACACCTCAAGTCCTGTGCTTGAGCAATAAAGTGGAAACAACAAAAAA	29069	0	A_55_P2740114	Fkbp4	ENSMUST00000032508	ens|FK506 binding protein 4 [Source:MGI Symbol;Acc:MGI:95543] [ENSMUST00000032508]	0.898717	0.169027	1.13071	0.0183288	2.36346	2	0	0	0	0.962117	0.707156	1.02688	1.17641	1.13584	1.50108	0.853561	0.796968	0.447838	1.15095	1.12595	1.11524
6637	13330	DATA	32134	196	154	ref|NM_001290528|ens|ENSMUST00000036453|ref|XM_011250587|gb|BC057197	mm|chr7:28441467-28441408	0	NA	3595	ATACTCAGGGACAGAATATTGTGGGGGATCTGGCACAAGGCGCAGCATTAAAGGTAAGCC	29160	0	A_52_P301591	Map3k10	NM_001290528	ref|Mus musculus mitogen-activated protein kinase kinase kinase 10 (Map3k10), mRNA [NM_001290528]	0.868748	0.0740248	1.15747	0.02622	6.36802	2	0	0	0	0.838623	0.814536	0.953086	1.16409	1.03537	1.08836	0.859627	0.962528	0.811356	1.16024	1.1822	1.12998
6644	13372	DATA	32242	197	98	ref|NM_017378|ens|ENSMUST00000195747|gb|AK028374|gb|AK165752	mm|chr18:38426927-38426868	0	NA	5405	AGGGTGATCTTGTAAGACCTGCGATTGTCAAGCTGGTTCACAGAGCTGTTGGGTTCCAGG	29355	0	A_52_P515769	Pcdh12	NM_017378	ref|Mus musculus protocadherin 12 (Pcdh12), mRNA [NM_017378]	0.772343	0.121431	1.14283	0.117303	3.80074	3	0	0	0	0.808986	0.871233	0.636811	1.45092	1.22156	1.66224	0.757322	0.632543	0.529898	1.11271	1.04352	1.27226
6652	13442	DATA	32405	198	97	ref|NM_177820|ens|ENSMUST00000089465|ref|XM_006521088|ref|XM_006543254	mm|chr15:77414652-77414593	0	NA	1921	CCTGAGATAACAATTCCTTCACTTTCTGGTATTCCTCTTGAAATATAAACCTTGTTTGGT	29354	0	A_55_P2006494	Apol10b	NM_177820	ref|Mus musculus apolipoprotein L 10B (Apol10b), mRNA [NM_177820]	0.669615	0.0555732	1.35115	0.20836	5.47404	2	0	0	0	0.625422	0.651418	0.732006	1.19116	1.1695	1.63244	0.605708	0.815951	0.522954	1.13235	1.37389	1.5472
6676	13733	DATA	33114	202	150	ref|NM_025862|ens|ENSMUST00000060513|ens|ENSMUST00000129490|ens|ENSMUST00000120367	mm|chr9:26782849-26782791	0	NA	1738	AGATCATGATGAAATAAATATTTGGGAACCTACTGCTAAGCAATGAGTTAGGGTGCACCC	30036	0	A_55_P2904786	Acad8	NM_025862	ref|Mus musculus acyl-Coenzyme A dehydrogenase family, member 8 (Acad8), mRNA [NM_025862]	0.914955	0.0380508	1.09008	0.0457221	5.09936	3	0	0	0	0.937047	0.871018	0.936799	0.983379	1.08472	1.13922	0.948196	0.982884	0.846489	1.09116	1.04383	1.13526
6684	13818	DATA	33384	204	92	ref|NM_172267|ref|NM_001252568|ref|NM_001281829|ref|NM_001252570	mm|chr2:30137418-30137477	0	NA	1427	TCTATGGGCTTTCTTTCTGATGGTGTCTGTGACCTTGGTCCAGCAGACAGGGAGCCAAGA	30221	0	A_55_P2744479	Phyhd1	NM_172267	ref|Mus musculus phytanoyl-CoA dioxygenase domain containing 1 (Phyhd1), transcript variant 1, mRNA [NM_172267]	0.884788	0.0804484	1.11741	0.136238	2.54663	3	0	0	0	0.806805	0.967494	0.880064	1.23867	0.971577	1.35372	0.670136	0.839952	0.919335	0.984428	1.11113	1.25669
6696	13961	DATA	33723	206	103	ref|NM_013512|ens|ENSMUST00000025234|ref|XM_006525631|ref|XM_006525630	mm|chr18:33957105-33957046	0	NA	2728	ACAGCTTGATTGAAGAAAAGTCTCAGCTATCTACAATCAACCCGGCTGGGAAACCTACAG	30535	0	A_55_P2735100	Epb4.1l4a	NM_013512	ref|Mus musculus erythrocyte protein band 4.1-like 4a (Epb4.1l4a), mRNA [NM_013512]	0.830738	0.06321	1.06484	0.0504265	5.01464	3	0	0	0	0.903647	0.797235	0.791332	1.20882	1.08105	1.62911	0.919492	0.966173	0.508602	1.09783	1.0068	1.08991
6738	14299	DATA	34542	211	102	ref|NM_033524|ens|ENSMUST00000028829|gb|AK017680|gb|BB086377	mm|chr2:117007850-117007909	0	NA	6153	CTGGCTGAGAGTTGTGAGTATATCATGTAAATACGCACATAGGAGTTTGTAACTGCTTTT	31419	0	A_51_P119857	Spred1	NM_033524	ref|Mus musculus sprouty protein with EVH-1 domain 1, related sequence (Spred1), transcript variant 1, mRNA [NM_033524]	1.12036	0.105372	0.916677	0.0245647	3.26056	2	0	0	0	1.23489	1.09867	1.02751	0.909749	0.90606	1.29889	0.939266	1.02262	0.812314	0.889268	0.936706	0.924056
6777	14655	DATA	35399	216	139	ref|NM_172708|ref|XM_006503898|ref|XM_006503899|ref|XM_006503900	mm|chr5:35430382-35430441	0	NA	2384	TCTGTTTCCACTTGTCATCTTGTTGGGACCTACTCCAGCAGTCGGGTACATGGTTTTAAA	32074	0	A_51_P322941	Dok7	NM_172708	ref|Mus musculus docking protein 7 (Dok7), mRNA [NM_172708]	0.821471	0.097426	1.20046	0.0592024	5.75795	3	0	0	0	0.933927	0.767885	0.7626	1.34533	1.0811	1.21223	0.836534	0.761909	0.697112	1.19223	1.1458	1.26334
6834	15191	DATA	36723	224	151	ref|NM_028275|ref|XM_006519680|ref|XM_011245223|gb|AK007175	mm|chr14:23875226-23875285	0	NA	826	TAACAGGTTTATCCGAGATGATCAGCTCTGAAGCTAAACTCTGCACGCCTTAGCCTGTTT	33259	0	A_51_P346874	1700112E06Rik	NM_028275	ref|Mus musculus RIKEN cDNA 1700112E06 gene (1700112E06Rik), mRNA [NM_028275]	0.661676	0.154648	1.08046	0.115053	3.76313	3	0	0	0	0.551392	0.595189	0.838449	1.44923	1.49191	1.17689	0.933658	0.905527	0.816381	0.957424	1.18538	1.09856
6839	15236	DATA	36825	225	89	ref|NM_130455|ens|ENSMUST00000045085|ref|XM_006513287|gb|AY062435	mm|chr10:79439842-79439901	0	NA	3180	AGAGCTGAGGAACTACACGGCCACACTGTCCACGACAGTTTATTCTATATACAAACACGA	33443	0	A_51_P397934	Grin3b	NM_130455	ref|Mus musculus glutamate receptor, ionotropic, NMDA3B (Grin3b), mRNA [NM_130455]	0.434697	0.270288	1.56351	0.561424	3.13782	2	0	0	0	0.378415	0.196981	0.728695	1.63432	1.18088	2.07103	0.509323	0.609582	0.000232	1.2909	1.19045	2.20919
6849	15319	DATA	37032	226	132	ref|NM_019932|ens|ENSMUST00000031320|gb|AK159278|gb|AK160040	mm|chr5:91202275-91202334	0	NA	453	CTGGAGAGTTAGGTATCAGCTGCCTAAATGTCAATTGTGTTACAAGACTCCTGGAATCTT	33517	0	A_51_P441426	Pf4	NM_019932	ref|Mus musculus platelet factor 4 (Pf4), mRNA [NM_019932]	0.856691	0.11077	1.06877	0.0769804	2.7231	3	0	0	0	0.780722	0.805561	0.983791	1.10127	1.16924	1.26003	0.971707	0.902228	0.819154	0.984798	1.08549	1.13601
6900	15838	DATA	38331	234	119	ref|NM_198894|ens|ENSMUST00000176179|tc|TC1632144|nap|NAP105017-1	mm|chr11:76391078-76391019	0	NA	163	TCATTGGGATTTGAGAATTCTTGTGTCTTCTTCGGGTGGCATCTTTCCAAATACTGATGG	34668	0	A_52_P184095	Abr	NM_198894	ref|Mus musculus active BCR-related gene (Abr), transcript variant 2, mRNA [NM_198894]	1.36297	0.318307	0.626829	0.106494	3.79873	2	0	0	0	1.70525	1.30783	1.07584	0.629065	1.27997	2.05727	0.917973	0.805333	0.340981	0.548411	0.748067	0.584009
6906	15893	DATA	38448	235	72	ref|NM_009783|ref|NM_001112813|ref|NM_001177888|ref|NM_001177890	mm|chr11:94270518-94270459	0	NA	7409	AAGAAAGATGCGCTGAGTCTCTCTGGTTTGTCTTCTGACCCAACAGACCTGGATCCCTGA	34866	0	A_55_P2132756	Cacna1g	NM_009783	ref|Mus musculus calcium channel, voltage-dependent, T type, alpha 1G subunit (Cacna1g), transcript variant 1, mRNA [NM_009783]	0.653457	0.318532	1.29493	0.221104	2.86543	3	0	0	0	0.295556	0.758972	0.905844	1.22803	1.15947	1.43369	0.810765	0.776639	0.746238	1.36483	1.47264	1.04733
6929	16102	DATA	38960	238	92	ref|NM_024290|ref|NM_001308111|ref|NR_131763|ens|ENSMUST00000035742	mm|chr7:150851773-150851714	0	NA	3224	CCTGGGTCAGTGAACTCAACTGAGAGCAATATTCCAATAAAACTGTGTTTAATATAATCT	35200	0	A_55_P2071132	Tnfrsf23	NM_024290	ref|Mus musculus tumor necrosis factor receptor superfamily, member 23 (Tnfrsf23), transcript variant 1, mRNA [NM_024290]	0.845405	0.335067	1.22292	0.0738885	1.90571	2	0	0	0	1.13759	0.918948	0.479675	1.27852	1.27971	1.05988	1.07205	0.850619	0.25424	1.26128	1.13774	1.26975
6969	16436	DATA	39806	243	118	ref|NM_007557|ens|ENSMUST00000009143|gb|BC010771|gb|X56906	mm|chr2:172695262-172695203	0	NA	1920	GCTGGCGTCTGTGTTGAAGGGAAACCAAGCAGAAGCCACTGTAATGATATGTCACAATAA	36119	0	A_52_P278354	Bmp7	NM_007557	ref|Mus musculus bone morphogenetic protein 7 (Bmp7), mRNA [NM_007557]	0.828978	0.189685	1.11839	0.100152	2.33696	3	0	0	0	0.925553	0.610439	0.950941	1.13706	1.19773	1.27744	1.36555	1.00116	0.17895	1.02655	1.10346	1.22517
6973	16447	DATA	39824	243	136	ref|NM_026893|ens|ENSMUST00000030145|ref|XM_006538228|ref|XM_006538229	mm|chr4:41240105-41240046	0	NA	1681	CTGGACTGTGGAGTTAATGACAACTAACTTTCTCCCAAAATGCAGATTTACACTAACTTC	36152	0	A_52_P78123	Dcaf12	NM_026893	ref|Mus musculus DDB1 and CUL4 associated factor 12 (Dcaf12), mRNA [NM_026893]	0.87705	0.124598	1.07957	0.0512949	2.6033	2	0	0	0	0.795445	0.815237	1.02047	1.1727	1.01288	1.12946	1.01993	1.00759	0.787583	1.02345	1.12403	1.09123
6979	16505	DATA	39948	244	96	gb|AK143253|riken|E230019D19	mm|chr8:11627728-11627669	0	NA	1300	ATGGATGCGGTTTTTTCACCCCAAAATGTTGAGTGTAAGCTATAGAGAGCTGTAATAACC	36080	0	A_55_P2735440	Ankrd10	AK143253	gb|Mus musculus 2 days pregnant adult female oviduct cDNA, RIKEN full-length enriched library, clone:E230019D19 product:ankyrin repeat domain 10, full insert sequence. [AK143253]	0.877083	0.280817	1.20145	0.108325	1.86657	2	0	0	0	1.05755	1.02016	0.553543	1.13499	1.01114	1.2612	0.357767	0.696934	1.30239	1.08469	1.29868	1.22096
6984	16556	DATA	40074	245	58	ref|NM_001040111|ref|NM_001040112|ref|NM_027180|ref|NM_198096	mm|chr7:108560077-108560136	0	NA	4813	TGCTTACCTAGGGTCATGCTCTTTGAATCCGTGGAATTGGAAAGATGGACAGAAATCAGG	36301	0	A_66_P104323	Arap1	NM_001040111	ref|Mus musculus ArfGAP with RhoGAP domain, ankyrin repeat and PH domain 1 (Arap1), transcript variant 3, mRNA [NM_001040111]	0.9128	0.0132835	1.17454	0.21499	2.10465	2	0	0	0	0.913083	0.925939	0.899376	1.12899	0.947734	0.968507	0.93922	1.02589	0.727657	1.13622	0.981277	1.40611
7001	16785	DATA	40576	248	68	ref|NM_001081105|ens|ENSMUST00000031106|ref|XM_011240779|gb|BC094937	mm|chr5:66284623-66284681	0	NA	1643	GGGTTCAACCATATGTTTGTGGCGTTATTGTTACTCCTGAATTTAATTTGGTTGGAACTT	36622	0	A_55_P2798054	Rhoh	NM_001081105	ref|Mus musculus ras homolog gene family, member H (Rhoh), mRNA [NM_001081105]	0.596902	0.249554	1.36312	0.454587	2.55914	3	0	0	0	0.357756	0.57725	0.855701	1.10323	1.25892	1.92104	1.10283	0.733611	0.000321	0.944591	1.84674	1.29801
7021	16972	DATA	40996	250	160	ref|XM_011247887|ref|XM_011247891|ref|XM_011247892|ref|XM_011247886	mm|chrX:165807900-165807959	0	NA	3785	GAGTATGATAATTCTCAAGATTTCGGAGACCCTTTTAAGAAGTAGTACACAGGTCAAAAA	37078	0	A_55_P2032633	LOC101055907	XM_011247887	ref|PREDICTED: Mus musculus periphilin-1-like (LOC101055907), transcript variant X8, mRNA [XM_011247887]	0.772684	0.167452	1.24051	0.0709335	4.45569	2	0	0	0	0.619386	0.951387	0.747279	1.27484	1.01831	1.23543	0.82684	1.27484	0.330178	1.2094	1.19044	1.32168
7030	17021	DATA	41145	251	145	ref|XM_006539206|ref|XM_006539205|ref|XM_006539207|gb|AK076876	mm|chr4:138447117-138447058	0	NA	5686	TGGCTATCTGCACTGTTTTAAGAACCAAATGTTTTTGTGTTTTTAATCCTCAACACTTGG	37342	0	A_52_P843910	Otud3	XM_006539206	ref|PREDICTED: Mus musculus OTU domain containing 3 (Otud3), transcript variant X2, mRNA [XM_006539206]	0.862491	0.107143	1.14051	0.0907356	3.42979	3	0	0	0	0.936254	0.739593	0.911625	0.996906	1.08439	1.1671	0.853913	0.993965	0.894716	1.17629	1.2079	1.03734
7040	17090	DATA	41308	252	144	ref|NM_007444|ref|NM_009665|ens|ENSMUST00000080898|ens|ENSMUST00000118392	mm|chr10:40009195-40009136	0	NA	1276	CAACGATTACAATTTTGTTTTTACCAGTTTTGCTAAGAAACAGCAACAACAGCAGAGTTG	37341	0	A_55_P2014511	Amd2	NM_007444	ref|Mus musculus S-adenosylmethionine decarboxylase 2 (Amd2), mRNA [NM_007444]	0.870286	0.0711331	1.18802	0.0436794	6.59291	3	0	0	0	0.951071	0.842746	0.81704	1.18316	1.04508	1.00832	0.89994	0.791222	0.897358	1.22525	1.19887	1.13994
7042	17095	DATA	41316	252	152	ens|ENSMUST00000193634|ref|XM_006511856|ref|XM_006511854|ref|XM_006511853	mm|chr9:108699954-108700013	0	NA	1608	CTGGTGTTCATTTTGTTCTTTTGTGACACAAACTACAAAAACCAATAAATGCATAACTGA	37357	0	A_66_P113339	Ip6k2	ENSMUST00000193634	ens|inositol hexaphosphate kinase 2 [Source:MGI Symbol;Acc:MGI:1923750] [ENSMUST00000193634]	0.865515	0.138182	1.20544	0.178689	2.6065	3	0	0	0	0.864173	0.728008	1.00436	1.31954	1.08022	1.05867	0.867641	0.823615	0.637448	1.23347	1.36846	1.01439
7060	17230	DATA	41674	255	18	ref|NM_146173|ref|NM_001301407|ens|ENSMUST00000046750|gb|AK172176	mm|chr6:29668480-29668539	0	NA	1922	CTGCACCAGAACTCAGTGTTTCTACAGTGTAAGAATCGGGAATCTGGCAGAAATGGCAAT	37701	0	A_51_P367240	Tspan33	NM_146173	ref|Mus musculus tetraspanin 33 (Tspan33), transcript variant 1, mRNA [NM_146173]	0.705395	0.0753328	1.25293	0.164438	5.24326	2	0	0	0	0.79014	0.646032	0.680012	1.34436	1.25609	1.34027	1.10077	0.762736	0.32079	1.06802	1.30803	1.38275
7079	17353	DATA	42007	257	23	ref|NM_025924|ens|ENSMUST00000043767|ref|XM_006508860|gb|BC116988	mm|chr8:13798195-13798254	0	NA	1058	TAAAGAGCCAAGGGACAAGAGATCTCGAGAGAAAGACCCTGAAACTTCTAGATGTCATCC	37989	0	A_55_P2483341	Upf3a	NM_025924	ref|Mus musculus UPF3 regulator of nonsense transcripts homolog A (yeast) (Upf3a), mRNA [NM_025924]	0.891153	0.0222716	1.07066	0.0794107	3.76979	2	0	0	0	0.867114	0.89526	0.911086	1.33806	1.10326	0.972317	1.16546	0.949081	0.586391	0.997474	1.05941	1.1551
7093	17445	DATA	42216	258	68	gb|AK080219|gb|AK040650|tc|TC1630875|riken|A530084I08	mm|chr7:126678435-126678494	0	NA	1051	AAGAAAAATCTAGTGCTGGGTTTCTGAGCTTTGCACACGTTGGGTAAATGTCCTATCATT	38071	0	A_55_P2732768	Acsm5	AK080219	gb|Mus musculus adult male aorta and vein cDNA, RIKEN full-length enriched library, clone:A530084I08 product:hypothetical Firefly luciferase-like structure containing protein, full insert sequence. [AK080219]	0.836222	0.133632	1.12514	0.0384171	3.59904	2	0	0	0	0.908467	0.68202	0.918181	0.946654	1.33506	1.20007	0.860229	1.07478	0.699104	1.13592	1.08249	1.15702
7112	17625	DATA	42627	260	151	ref|NM_172903|ens|ENSMUST00000098346|ref|XM_006540598|ref|XM_006540599	mm|chr7:87494070-87494011	0	NA	6466	CGCCTACAGCAAGACTTATTTGCTACCATATGGTTTGTAATCAAATGATAGGGAACTGTG	38510	0	A_52_P287219	Man2a2	NM_172903	ref|Mus musculus mannosidase 2, alpha 2 (Man2a2), mRNA [NM_172903]	0.93089	0.0362857	1.0794	0.0766947	3.03175	2	0	0	0	0.890264	0.942324	0.960081	1.23733	1.09164	1.06319	0.914478	0.87513	0.787355	1.16792	1.03757	1.03272
7114	17646	DATA	42707	261	67	ens|ENSMUST00000124825|gb|AK050924|riken|D030036L15|nap|NAP118603-1	mm|chr2:75827295-75827236	0	NA	2111	AAAGAGATCAGTGCACTAAGAAACAATGTTGCTAGGTGCCCTTTACAGCTGTGTCTGCAG	38658	0	A_55_P2718720	Pde11a	ENSMUST00000124825	ens|phosphodiesterase 11A [Source:MGI Symbol;Acc:MGI:3036251] [ENSMUST00000124825]	0.805463	0.153035	1.33276	0.151632	4.23937	3	0	0	0	0.730282	0.981548	0.70456	1.09018	1.10365	1.35453	1.09912	0.93772	0.000132	1.48452	1.3325	1.18126
7115	17653	DATA	42723	261	83	ref|NM_026272|ens|ENSMUST00000103015|gb|AK003855|gb|AK076232	mm|chr11:121115813-121115872	0	NA	3054	TATATCCCTTGGGTATCCATCCCCAAAGTAACTGGTTATGGAATAAACAATGCAATGGGG	38686	0	A_55_P2868246	Narf	NM_026272	ref|Mus musculus nuclear prelamin A recognition factor (Narf), mRNA [NM_026272]	0.867074	0.0388252	1.12013	0.0550715	6.50481	3	0	0	0	0.824733	0.875486	0.901004	1.20738	1.00572	1.04803	1.0865	0.873121	0.817635	1.18204	1.10177	1.07659
7128	17818	DATA	43142	264	10	ens|ENSMUST00000120079|nap|NAP029730-1|nap|NAP061253-1	mm|chrX:148978817-148978796	0	NA	180	AGGAGGCTGGAGACCTTGGACATCCCAATGTTGTACGCGTGGATGTCTGTGCTACTTTCC	38848	0	A_52_P395544	ENSMUST00000120079	ENSMUST00000120079	ens|predicted gene 7158 [Source:MGI Symbol;Acc:MGI:3647927] [ENSMUST00000120079]	1.18184	0.131324	0.673072	0.280124	2.8483	2	0	0	0	1.27452	1.23943	1.03156	0.821992	1.17158	1.80184	1.43238	0.649269	0.558215	0.76708	0.894101	0.358037
7130	17846	DATA	43220	264	88	ref|NM_019577|ens|ENSMUST00000004936|ref|XM_006504444|ref|XM_006504445	mm|chr5:136046544-136046485	0	NA	551	TTAGGGGATGTGTTTATTCTGTGAGAACCTGAGTGAGCTGCAAGCATGCCAGAGTTCTGG	38986	0	A_52_P18116	Ccl24	NM_019577	ref|Mus musculus chemokine (C-C motif) ligand 24 (Ccl24), mRNA [NM_019577]	0.754101	0.170717	1.24374	0.149919	3.73278	3	0	0	0	0.725333	0.599596	0.937374	1.33172	1.04323	1.63265	0.774465	0.658101	0.566303	1.1979	1.1221	1.41123
7137	17973	DATA	43515	266	55	ref|NM_025907|ens|ENSMUST00000055303|ref|XM_011245153|ref|XM_006519432	mm|chr14:32292264-32292205	0	NA	1624	GAGCCAATGAGAATTGTTTTTCTGACCTCACATGTGCACAAATAAGTAAATAAAGTGGAT	39216	0	A_52_P151284	Mettl6	NM_025907	ref|Mus musculus methyltransferase like 6 (Mettl6), mRNA [NM_025907]	0.872801	0.0260949	1.07951	0.145642	2.41971	2	0	0	0	0.847834	0.899894	0.870676	1.3015	1.09928	0.996577	1.00047	1.0458	0.699445	1.24129	0.95886	1.03837
7141	17985	DATA	43556	266	96	ref|NM_001001980|ref|NM_001256122|ens|ENSMUST00000140428|ens|ENSMUST00000038188	mm|chr5:67408972-67413145	0	NA	2164	GAAGATGAGATGAGTGGGAAGGTGGAGTTAGTGTTGTCACAGAAGGTGGCAAAGCCAAAA	39290	0	A_52_P456392	Limch1	NM_001001980	ref|Mus musculus LIM and calponin homology domains 1 (Limch1), transcript variant 1, mRNA [NM_001001980]	0.87476	0.0147919	1.20068	0.127079	4.41244	2	0	0	0	0.864725	0.891747	0.867808	1.10265	1.04139	1.16692	0.831291	0.74998	0.881441	1.17731	1.33782	1.08691
7177	18246	DATA	44199	270	83	ref|NM_001163447|ref|NM_001163449|ref|NM_001163450|ref|NM_001163451	mm|chr17:25035998-25035939	0	NA	4028	TGAAACTGAGGAATGTGCCGGGGACGTGAACCAGACAAAGCCCTCGTTGTCCAAGGCTGA	39859	0	A_55_P2085751	Mapk8ip3	NM_001163447	ref|Mus musculus mitogen-activated protein kinase 8 interacting protein 3 (Mapk8ip3), transcript variant 2, mRNA [NM_001163447]	0.757692	0.0156447	1.14259	0.137327	4.82337	2	0	0	0	0.7658	0.739658	0.767619	1.34551	1.26277	1.06724	0.773346	0.97251	0.877779	0.987064	1.19357	1.24714
7208	18555	DATA	44937	275	1	ref|NM_001033256|gb|AK169460|gb|AK048180|tc|TC1598012	mm|chr2:122458324-122458383	0	NA	1204	ATCTCCAGTCATATTGATTTAGGTCTCCTGGCAGAAATGACGGTTGGCTATGTTGGTGCT	40587	0	A_55_P2095573	Spata5l1	NM_001033256	ref|Mus musculus spermatogenesis associated 5-like 1 (Spata5l1), mRNA [NM_001033256]	1.03554	0.129656	0.827185	0.0561117	2.55444	2	0	0	0	1.16134	0.902344	1.04294	0.821381	2.03582	1.13653	1.66844	0.749124	0.000522	0.785688	0.80484	0.891027
7212	18580	DATA	44997	275	61	ref|NM_025819|ens|ENSMUST00000124880|ens|ENSMUST00000111883|ens|ENSMUST00000064771	mm|chr1:153219470-153217747	0	NA	2680	GAGACTCTCTATAACTTCCTAATCAAGTATGAGGTAAACAAAAATGTCAAATTCACTGCC	40698	0	A_65_P10773	Swt1	NM_025819	ref|Mus musculus SWT1 RNA endoribonuclease homolog (S. cerevisiae) (Swt1), mRNA [NM_025819]	0.698927	0.211017	1.15925	0.137864	3.16317	3	0	0	0	0.904338	0.709723	0.482719	2.02436	1.00335	1.39782	0.880046	1.11966	0.000221	1.16695	1.0177	1.29311
7229	18763	DATA	45421	277	157	ref|NM_153410|ref|NM_001199147|ref|NM_001199146|ens|ENSMUST00000066889	mm|chr2:26203618-26203677	0	NA	3226	GACATGGTGGCCGCCCCGCATACTTGAATGTACATGCGTATTTATTGCTTACATGTGTTT	41168	0	A_51_P386585	Gpsm1	NM_153410	ref|Mus musculus G-protein signalling modulator 1 (AGS3-like, C. elegans) (Gpsm1), transcript variant 1, mRNA [NM_153410]	0.886789	0.111111	1.14911	0.034836	3.90185	2	0	0	0	0.800539	0.847658	1.01217	1.27265	1.10838	1.04928	0.772155	0.851959	0.837888	1.17781	1.15916	1.11035
7232	18780	DATA	45458	278	30	ref|NM_183408|ref|NM_019798|ens|ENSMUST00000039413|ens|ENSMUST00000131769	mm|chr9:21015961-21016020	0	NA	2921	TTGAAGTGGGGTATGGAGAGCCAGGAACTGAAGTCCCCCAAAAAAGGGATTTTATTTTTT	40940	0	A_55_P2029187	Pde4a	NM_183408	ref|Mus musculus phosphodiesterase 4A, cAMP specific (Pde4a), transcript variant 5, mRNA [NM_183408]	0.825519	0.0968419	1.13903	0.0917749	4.06994	3	0	0	0	0.75283	0.788272	0.935454	1.20476	1.14351	1.15035	0.993537	0.959899	0.6543	1.1684	1.21252	1.03616
7261	19091	DATA	46227	282	143	ref|NM_021351|ens|ENSMUST00000086629|ens|ENSMUST00000112385|ref|XM_006534749	mm|chr5:112675819-112675760	0	NA	485	CCTGGCTACCGAGGTTTTCAGTACATCCTGGAGAGCGATCACCACTCAGGTGACTACAAG	41728	0	A_51_P285299	Cryba4	NM_021351	ref|Mus musculus crystallin, beta A4 (Cryba4), mRNA [NM_021351]	0.517877	0.144227	1.38287	0.127416	7.78498	3	0	0	0	0.479486	0.39673	0.677416	1.53985	1.29882	1.47352	0.893866	0.658896	0.43281	1.51914	1.36276	1.2667
7263	19093	DATA	46229	282	145	ref|NM_133808|ref|NM_001301364|ens|ENSMUST00000189025|ens|ENSMUST00000186787	mm|chr1:95337277-95334922	0	NA	362	TGGTTCCACAACAAATCAAAGTTGCCACCTTAAATTCAGAAGAGGAAAATGACCCTCCAA	41731	0	A_52_P36586	Hdlbp	NM_133808	ref|Mus musculus high density lipoprotein (HDL) binding protein (Hdlbp), transcript variant 1, mRNA [NM_133808]	0.924035	0.062992	1.10499	0.0511035	3.8639	3	0	0	0	0.859412	0.927434	0.985259	1.05427	1.06387	1.01059	0.997824	0.956445	0.829941	1.05874	1.15985	1.09637
7264	19157	DATA	46396	283	148	ref|NM_022982|ens|ENSMUST00000059589|gb|AF283462|gb|BC052317	mm|chr16:18152423-18152482	0	NA	1795	TCGCGGTATATAGAGATATGAATTTTATTTTACTTGTGTAAAATATCGGATGACGTGGAA	42033	0	A_51_P450888	Rtn4r	NM_022982	ref|Mus musculus reticulon 4 receptor (Rtn4r), mRNA [NM_022982]	0.387533	0.289235	1.33351	0.265017	4.17673	3	0	0	0	0.292852	0.157504	0.712242	1.93053	1.22252	1.86205	1.12478	0.445925	0.251059	1.10404	1.62358	1.27292
7267	19195	DATA	46487	284	75	ref|NM_146025|ens|ENSMUST00000055947|ref|XM_006533010|ref|XM_006533011	mm|chr11:94887191-94887250	0	NA	3107	CAGGGCCCTATGTTTGTGCTCAGTCACCTTCACTGGAAGAGGGGGCCTCATAGGGAAAAC	41902	0	A_51_P101137	Samd14	NM_146025	ref|Mus musculus sterile alpha motif domain containing 14 (Samd14), mRNA [NM_146025]	1.16477	0.169918	0.937509	0.0442278	2.24189	2	0	0	0	1.30311	1.2161	0.975106	0.847789	1.15548	1.32252	1.10835	0.889512	0.3695	0.887363	0.970956	0.954208
7269	19209	DATA	46515	284	103	tc|TC1695966|nap|NAP020522-001	mm|chr4:034690964-034690905	0	NA	180	TATAGTTATCTGTGTTTTTCTTTTCCCTTCTTTCCTGTCTTTCATTCTCTTCTTTCTCTC	41953	0	A_55_P2085518	TC1695966	TC1695966	tc|MUSCNCG cGMP-gated cation channel protein {Mus musculus} (exp=-1; wgp=0; cg=0), partial (4%) [TC1695966]	1.80983	0.32893	0.650962	0.593091	2.95964	3	0	0	0	2.00078	1.9987	1.43002	0.000998	0.000998	4.61263	0.000998	0.000998	0.000998	1.1628	0.789086	0.000998
7285	19346	DATA	46847	286	107	ref|NM_027758|ref|NM_001111304|ens|ENSMUST00000093393|gb|AK173050	mm|chr8:85796750-85796809	0	NA	5059	GCAGAATGATTTTTAAACTGTCAAATGAAGGAGTTATGAACCTCAGCTAGGATAAATGTG	42253	0	A_55_P2811079	Tbc1d9	NM_027758	ref|Mus musculus TBC1 domain family, member 9 (Tbc1d9), transcript variant 2, mRNA [NM_027758]	0.675687	0.240224	1.13682	0.222529	2.43913	3	0	0	0	0.813452	0.815307	0.398302	1.15148	1.55812	1.57945	0.679448	1.00325	0.59073	0.914457	1.13648	1.35951
7316	19635	DATA	47572	291	12	ref|NM_178652|ens|ENSMUST00000050630|ref|XM_006523480|ref|XM_006523475	mm|chr17:45170231-45173688	0	NA	806	AGAATTCTGTGAAAGCCGACAGTTAAGTTTCTCCAAAAAAGCTTCCAAATTCCGAGACTG	42958	0	A_51_P510663	Supt3	NM_178652	ref|Mus musculus suppressor of Ty 3 (Supt3), mRNA [NM_178652]	1.00345	0.0576868	1.21349	0.0464311	4.91286	3	0	0	0	1.03678	0.936836	1.03673	0.795747	0.886191	1.27334	1.34786	1.04595	0.000112	1.23209	1.16064	1.24773
7318	19647	DATA	47600	291	40	ref|NM_009037|ens|ENSMUST00000127019|ens|ENSMUST00000006128|gb|AK211610	mm|chr2:105227267-105227208	0	NA	1900	TAGTGGATTTATTATTTGTTGAGTCCTGAATCTCTGAGCCTGCTTCTAGCACAGCTTATG	43011	0	A_51_P305437	Rcn1	NM_009037	ref|Mus musculus reticulocalbin 1 (Rcn1), mRNA [NM_009037]	0.942326	0.0436598	1.0507	0.0603294	2.52052	3	0	0	0	0.89721	0.984367	0.9454	0.953657	1.08775	1.11455	1.07288	1.18447	0.607637	1.00465	1.11899	1.02845
7319	19648	DATA	47601	291	41	ref|NM_001290457|ref|NM_009046|ens|ENSMUST00000098754|ens|ENSMUST00000148040	mm|chr7:20191998-20191939	0	NA	1767	TACTGCTAGCCTTGTGGGCAGCAACATGTTTCCCAACCAGTACCGAGAGGCAGCTTTCGG	43013	0	A_55_P2744644	Relb	NM_001290457	ref|Mus musculus avian reticuloendotheliosis viral (v-rel) oncogene related B (Relb), transcript variant 2, mRNA [NM_001290457]	0.826811	0.0940234	1.12513	0.038803	5.0798	2	0	0	0	0.891609	0.869854	0.718972	0.814413	1.42382	1.97322	0.868801	1.06372	0.000211	1.08056	1.14337	1.15144
7327	19719	DATA	47753	292	29	ref|NM_001081024|ens|ENSMUST00000159640|ens|ENSMUST00000095775|ref|XM_006519344	mm|chr14:60025542-60025483	0	NA	2568	GAATGTTTTTGTAGAAACACATGACAGGAATTTCCCATTGGTGGCCTTCTTCACCAACAG	42992	0	A_55_P2744930	Setdb2	NM_001081024	ref|Mus musculus SET domain, bifurcated 2 (Setdb2), mRNA [NM_001081024]	0.922608	0.0909628	1.08688	0.065412	2.53952	3	0	0	0	0.82438	0.939508	1.00394	1.10698	1.13407	1.18203	0.849959	1.37815	0.320353	1.0119	1.13224	1.1165
7341	19808	DATA	47963	293	75	gb|AK045559|gb|BB306991|riken|B230210L07|nap|NAP116788-1	mm|chr9:57387893-57387834	0	NA	1641	TTCCTTAGTTTTTGACAATCTTAATGTCTTAGACATATAAGGAGGGTACAATGTGCAAGC	43364	0	A_52_P183021	AK045559	AK045559	gb|Mus musculus adult male corpora quadrigemina cDNA, RIKEN full-length enriched library, clone:B230210L07 product:unclassifiable, full insert sequence. [AK045559]	0.719942	0.177214	1.21647	0.0872512	4.35382	2	0	0	0	0.910068	0.690407	0.559351	1.05088	1.73051	0.782721	1.02336	0.989599	0.613706	1.19575	1.31221	1.14144
7356	19919	DATA	48249	295	33	ref|NM_172695|ens|ENSMUST00000135696|ens|ENSMUST00000127656|ens|ENSMUST00000107107	mm|chr4:94241873-94240732	0	NA	1760	AGTTGATCCATTTACAGGGAACAGTGCCTACCGATCAGCTGCATCTAAAACAGTGAACAT	43573	0	A_55_P2632492	Plaa	NM_172695	ref|Mus musculus phospholipase A2, activating protein (Plaa), mRNA [NM_172695]	0.870333	0.168791	1.13505	0.100178	2.33595	3	0	0	0	0.675485	0.971793	0.96372	1.38236	1.05351	1.28721	1.07221	0.811036	0.37753	1.20105	1.18432	1.01978
7360	19939	DATA	48299	295	83	ref|XM_006527295|ref|XM_006527294|gb|AK178550|gb|AK182869	mm|chr19:18745827-18745886	0	NA	416	GTGTGCACTTTTTGTAGAGAACTGAACGGTGCTGCCGAGTGGCTCTGACCGGATGGTGGA	43665	0	A_66_P128204	2410127L17Rik	XM_006527295	ref|PREDICTED: Mus musculus RIKEN cDNA 2410127L17 gene (2410127L17Rik), transcript variant X4, mRNA [XM_006527295]	0.872169	0.105556	1.12577	0.0946945	3.09748	3	0	0	0	0.755306	0.960593	0.900607	1.43097	1.04106	1.19322	1.03567	0.878981	0.4263	1.15984	1.19871	1.01875
7367	19988	DATA	48412	296	32	ref|NM_008156|ens|ENSMUST00000021773|ens|ENSMUST00000143010|ref|XM_011244282	mm|chr13:25082382-25082441	0	NA	3235	CTTAGCTTAAAGAAGGTAGGAACTGTGGAGTAGGACTCTGTTGAGGAGAGTTACGTACTG	43572	0	A_51_P402583	Gpld1	NM_008156	ref|Mus musculus glycosylphosphatidylinositol specific phospholipase D1 (Gpld1), mRNA [NM_008156]	0.756294	0.145578	1.28485	0.161494	4.21062	3	0	0	0	0.806601	0.870045	0.592234	1.94831	0.730581	1.11991	1.01258	1.06485	0.000335	1.16351	1.46815	1.2229
7373	20040	DATA	48530	296	150	ref|NM_009405|ens|ENSMUST00000129618|ens|ENSMUST00000105971|ref|XM_006508539	mm|chr7:149630241-149630300	0	NA	597	AGCATTGGGGAAGCACCCAACATCCAGTCTGGGAGTACTTGGCCTCGCTCCAATAAAGGA	43792	0	A_51_P355122	Tnni2	NM_009405	ref|Mus musculus troponin I, skeletal, fast 2 (Tnni2), mRNA [NM_009405]	0.677123	0.345099	1.22243	0.182062	2.42067	3	0	0	0	0.410507	0.553955	1.06691	1.36869	1.33207	1.50107	0.945188	0.543131	0.611193	1.14195	1.43086	1.09447
7375	20060	DATA	48577	297	33	ref|NM_201230|ref|NM_001197046|ens|ENSMUST00000162586|ens|ENSMUST00000024636	mm|chr17:8362938-8362997	0	NA	446	TGGGTGGACCCTTATTATTAGAAGTGATTAGACGCTGTCAACAGAAAGAAAAAGGACCGG	43875	0	A_52_P147778	Fgfr1op	NM_201230	ref|Mus musculus Fgfr1 oncogene partner (Fgfr1op), transcript variant 2, mRNA [NM_201230]	0.859226	0.0977782	1.11368	0.113299	2.94495	3	0	0	0	0.900339	0.929734	0.747604	1.29902	0.998435	1.29634	1.14481	0.942724	0.39995	1.15234	1.20259	0.986114
7380	20087	DATA	48644	297	100	ref|NM_133804|ens|ENSMUST00000025645|ref|XM_006527503|gb|AK036651	mm|chr19:10932383-10932324	0	NA	3424	CTTATTTATGGGAACCACTTCATTCTACTGTTGGGTACAGAATAAATGAGAAAAGAATGG	43995	0	A_55_P2113081	Tmem132a	NM_133804	ref|Mus musculus transmembrane protein 132A (Tmem132a), mRNA [NM_133804]	0.711287	0.0680309	1.16288	0.0488822	9.33715	3	0	0	0	0.77474	0.639454	0.719667	1.32888	1.20775	1.58104	0.899235	0.748518	0.612072	1.14424	1.21834	1.12606
7389	20151	DATA	48812	298	104	ref|NM_027412|ens|ENSMUST00000088092|ens|ENSMUST00000096751|gb|AK008753	mm|chr19:8885904-8885845	0	NA	1130	GACAGGCAAACAGGAATCTTCTGTAGTATCTTCAGATGCTTTTGTTTTGCTTAGTGGGAT	44003	0	A_51_P178872	Ttc9c	NM_027412	ref|Mus musculus tetratricopeptide repeat domain 9C (Ttc9c), mRNA [NM_027412]	0.929448	0.0158837	1.00634	0.052545	2.42618	2	0	0	0	0.924024	0.916987	0.947334	1.15976	1.02166	1.38472	0.91083	0.854535	0.861132	0.99967	1.0619	0.957449
7397	20200	DATA	48913	299	41	ref|NM_172402|ens|ENSMUST00000022908|ref|XM_006521385|gb|AK172597	mm|chr15:38944179-38944120	0	NA	83	TCCGGTCCCGGAAGTGGGCTCGCGTCCTGCGGTTCCAGGCCCCGGGCCGCGACAGTCGCC	44182	0	A_66_P134650	Slc25a32	NM_172402	ref|Mus musculus solute carrier family 25, member 32 (Slc25a32), mRNA [NM_172402]	0.698819	0.236789	1.06852	0.109126	2.45603	2	0	0	0	0.666217	0.480021	0.95022	2.05618	1.07078	1.98472	0.727781	0.858056	0.00044	1.08324	1.16954	0.952785
7405	20292	DATA	49133	300	97	ref|NM_175427|ens|ENSMUST00000151224|gb|AK162827|tc|TC1677436	mm|chr2:26965967-26965908	0	NA	2877	ATGGGACTTGCCAGGGACCCACACAGCACCCTGAAAAAGCAAAAGCCAATAAATTTGTTT	44290	0	A_55_P2487764	Fam163b	NM_175427	ref|Mus musculus family with sequence similarity 163, member B (Fam163b), mRNA [NM_175427]	0.806922	0.138197	1.22561	0.291736	2.24648	2	0	0	0	0.870904	0.901534	0.648329	1.35243	1.18218	1.39148	0.909574	1.06642	0.000306	0.989212	1.13598	1.55165
7410	20318	DATA	49196	300	160	ref|NM_007933|ref|NM_001276285|ref|NM_001136062|ens|ENSMUST00000170716	mm|chr11:70475953-70476012	0	NA	1529	CTTTCACAGGAAAGACACAGGCCTTCAAGCCCTTCTCCCAGAAATAAACACTGCCAAACC	44403	0	A_55_P1977533	Eno3	NM_007933	ref|Mus musculus enolase 3, beta muscle (Eno3), transcript variant 1, mRNA [NM_007933]	0.90368	0.0925544	1.06267	0.0256166	2.86757	2	0	0	0	0.872794	0.830517	1.00773	1.08389	1.12056	1.18442	1.08234	0.905791	0.72394	1.0914	1.0422	1.05442
7411	20323	DATA	49219	301	19	ref|NM_174988|ens|ENSMUST00000065438|ref|XM_011239238|ref|XM_006498534	mm|chr2:164937116-164937057	0	NA	3476	AACAGCACCTACCTCGAAGATTTGAGAGGATCAAAAGGGTTCATGTGTCAAGTTGTTGGG	44442	0	A_55_P2050390	Cdh22	NM_174988	ref|Mus musculus cadherin 22 (Cdh22), mRNA [NM_174988]	0.412968	0.251399	1.40586	0.479667	3.17555	3	0	0	0	0.278631	0.257276	0.702997	2.16187	1.47642	2.07226	0.517794	0.315113	7.63e-05	1.09377	1.95817	1.16562
7413	20332	DATA	49238	301	38	ref|NM_001081407|ref|NM_172147|ens|ENSMUST00000101376|ref|XM_006504047	mm|chr5:32666473-32666532	0	NA	4596	GGCCTGGCAGTTGGCATCCTTGGAGTGATGTTGTGGAGAACTGTGAAACCCGTCCAACAG	44476	0	A_52_P686218	Plb1	NM_001081407	ref|Mus musculus phospholipase B1 (Plb1), transcript variant 1, mRNA [NM_001081407]	0.611683	0.131559	1.35863	0.271594	4.28705	2	0	0	0	0.461242	0.668643	0.705164	1.39928	0.928571	1.72256	1.06812	0.970276	0.000271	1.0839	1.36501	1.62697
7433	20458	DATA	49549	303	21	ref|NM_013710|ref|NM_001159538|ens|ENSMUST00000024810|ens|ENSMUST00000123989	mm|chr17:29516099-29516158	0	NA	2240	CCACCTGATGTCTATACCGAGACAATTCATCCTGACTCTGTATCCAGCAGACACAGGCCC	44736	0	A_52_P260994	Fgd2	NM_013710	ref|Mus musculus FYVE, RhoGEF and PH domain containing 2 (Fgd2), transcript variant 2, mRNA [NM_013710]	0.824743	0.109565	1.45889	0.345184	3.0329	2	0	0	0	0.716686	0.935755	0.821788	1.35339	1.03799	1.24524	0.615463	0.896781	0.000222	1.22889	1.29197	1.85581
7435	20464	DATA	49564	303	36	ref|NM_027134|ens|ENSMUST00000132966|ens|ENSMUST00000074792|gb|AK009430	mm|chr9:65300144-65300203	0	NA	1324	GTAGCAGTCAAGGGCGGACTTTTCTACTTGAATCACACAAGAAGTTTAAATAAAATTTGT	44764	0	A_55_P2129856	Mtfmt	NM_027134	ref|Mus musculus mitochondrial methionyl-tRNA formyltransferase (Mtfmt), mRNA [NM_027134]	0.949358	0.0526876	1.12478	0.105105	2.58432	2	0	0	0	0.89365	0.956037	0.998388	1.0337	0.927472	1.16105	0.962285	1.11681	0.57626	1.12713	1.22869	1.01852
7436	20470	DATA	49576	303	48	ref|NM_175255|ref|NM_001290785|ens|ENSMUST00000109097|ref|XM_011249310	mm|chr11:51514337-51510217	0	NA	3693	TGCATCAATTCCACAGACAATGACAGATCTTCCAGAACTTGATACACCAGAATCTGCCAG	44787	0	A_52_P409711	Sec24a	NM_175255	ref|Mus musculus Sec24 related gene family, member A (S. cerevisiae) (Sec24a), transcript variant 1, mRNA [NM_175255]	0.718859	0.118133	1.25598	0.434655	2.06543	2	0	0	0	0.842446	0.707064	0.607066	1.1509	1.02337	1.82166	0.747217	1.33198	0.000369	1.02183	1.75751	0.988598
7463	20659	DATA	50002	305	146	ref|NM_026282|ens|ENSMUST00000098942|ref|XM_011242588|ref|XR_379132	mm|chr9:21560607-21560548	0	NA	627	ACAGAACTGGGGTTGAGGGAGCCAAGGAGGGGATCACTCTAAAATTAAATGTCTGTATGT	45255	0	A_55_P2738634	Spc24	NM_026282	ref|Mus musculus SPC24, NDC80 kinetochore complex component, homolog (S. cerevisiae) (Spc24), mRNA [NM_026282]	0.718174	0.313634	1.23849	0.14806	2.59846	2	0	0	0	0.517831	0.557074	1.07962	1.28449	1.17795	1.56029	0.824759	0.693876	0.588644	1.38282	1.24569	1.08696
7479	20794	DATA	50327	307	143	ref|NM_011031|ref|NM_001136076|ens|ENSMUST00000093107|ens|ENSMUST00000019050	mm|chr11:53945032-53945091	0	NA	2146	CAGATATTTCAGGTAGAAGATGTCTCAGTGAAACCAAAGTTCTGATGCTGTTTACATGTG	45548	0	A_52_P663413	P4ha2	NM_011031	ref|Mus musculus procollagen-proline, 2-oxoglutarate 4-dioxygenase (proline 4-hydroxylase), alpha II polypeptide (P4ha2), transcript variant 2, mRNA [NM_011031]	0.772289	0.168536	1.18307	0.104897	3.58409	3	0	0	0	0.682261	0.667887	0.966721	1.2848	1.27755	1.29688	0.805265	0.701607	0.76782	1.18132	1.28883	1.07906
7485	20816	DATA	50392	308	44	ref|NM_001163194|ens|ENSMUST00000174534|ens|ENSMUST00000171166|ref|XM_006536655	mm|chr17:35787450-35787509	0	NA	441	TGAACACGCCTTGATCTAGCAGGCTCCTGCCCTGCTGCAAGCTAATAAACGTGGAATTCA	45366	0	A_66_P115467	Sfta2	NM_001163194	ref|Mus musculus surfactant associated 2 (Sfta2), mRNA [NM_001163194]	1.22705	0.184884	0.805141	0.172187	2.89247	3	0	0	0	1.43165	1.07196	1.17755	0.94154	0.943847	1.60733	1.62241	0.78787	0.000426	0.962833	0.831167	0.621423
7507	20961	DATA	50716	310	40	ref|NM_026298|ens|ENSMUST00000041565|ref|XR_376822|gb|AY339616	mm|chr5:31556819-31556676	0	NA	4872	AACATGGCTTTCATTTTCCTCAATCGGTTCTTGGATCTGACTGATGCAATCGAAGAAGGG	45664	0	A_52_P509906	Ift172	NM_026298	ref|Mus musculus intraflagellar transport 172 (Ift172), mRNA [NM_026298]	1.10268	0.0091842	1.00413	0.0493986	3.39729	2	0	0	0	1.10043	1.11278	1.09482	0.921469	0.909548	1.25555	1.05149	1.062	0.479529	0.947837	1.04026	1.02428
7522	21121	DATA	51124	312	120	ref|NM_015732|ens|ENSMUST00000052915|ens|ENSMUST00000139682|ref|XM_006532057	mm|chr11:108811980-108812039	0	NA	4142	TTCTACTTTAGACTGTAAATTATGCATTATAAAGAGTTCATTTAAAGAAAACTACTTGGT	46094	0	A_52_P54176	Axin2	NM_015732	ref|Mus musculus axin2 (Axin2), mRNA [NM_015732]	1.01652	0.127407	1.25657	0.0757493	2.80507	3	0	0	0	1.10863	1.06981	0.871123	0.375364	1.32224	0.943805	1.11043	0.910691	0.518188	1.27378	1.1737	1.32224
7526	21151	DATA	51196	313	28	gb|AK171905|tc|TC1672196|riken|F830018L13|nap|NAP020287-001	mm|chr10:88872449-88872390	0	NA	2865	TGTATGGACTTTTAGTGCCCTTGGCCTGTCATCTCCACAAAGTCTCATCACACAGATACA	46224	0	A_55_P2064676	Gas2l3	AK171905	gb|Mus musculus activated spleen cDNA, RIKEN full-length enriched library, clone:F830018L13 product:unclassifiable, full insert sequence. [AK171905]	0.801384	0.318067	1.30633	0.139704	2.51757	2	0	0	0	0.88844	1.06686	0.448854	1.69369	0.643982	1.96077	0.000438	1.37754	0.000438	1.21937	1.46748	1.23214
7527	21179	DATA	51263	313	95	ens|ENSMUST00000189383|gb|AK045158|tc|TC1628731|riken|B130041N16	mm|chr1:60558586-60558527	0	NA	1523	ACTTATGAGTGCTGAGTCAGTAGAGTTAAAAGCCTGACAGCCACGTGATTGGCCGTTATA	46345	0	A_55_P2718242	Raph1	ENSMUST00000189383	ens|Ras association (RalGDS/AF-6) and pleckstrin homology domains 1 [Source:MGI Symbol;Acc:MGI:1924550] [ENSMUST00000189383]	0.991392	0.0985371	1.27457	0.28025	1.65107	2	0	0	0	1.08529	1.0001	0.88879	1.08857	0.890734	1.22503	0.615858	0.848689	0.533225	1.10655	1.5981	1.11907
7551	21453	DATA	51958	317	134	ref|NM_153744|ens|ENSMUST00000160732|ens|ENSMUST00000188073|ref|XM_006495988	mm|chr1:74785599-74785540	0	NA	2728	ATTAATCTCAGTCAATTCTGGGTCTCTTCATCTGCCTTTACCCTACCCTGTGATGACAGG	46993	0	A_55_P2496699	Prkag3	NM_153744	ref|Mus musculus protein kinase, AMP-activated, gamma 3 non-catatlytic subunit (Prkag3), mRNA [NM_153744]	0.746173	0.204465	1.20015	0.159315	3.03355	3	0	0	0	0.662966	0.596431	0.979123	1.27845	1.08369	1.41035	0.863351	0.904935	0.620249	1.38403	1.10352	1.1129
7580	21698	DATA	52545	321	65	ref|NM_181402|ens|ENSMUST00000039680|ref|XM_006505231|ref|XM_006505234	mm|chr6:127443888-127443947	0	NA	3354	TCGTGTTAACGTTGTACTGTTTTGTCTGTTCCATGTATAGAAGAACATCACTCCCTCTGC	47462	0	A_51_P452227	Parp11	NM_181402	ref|Mus musculus poly (ADP-ribose) polymerase family, member 11 (Parp11), mRNA [NM_181402]	0.857025	0.0644553	1.16759	0.119613	3.95893	3	0	0	0	0.917384	0.864557	0.789135	1.09891	1.10096	1.02291	0.870783	1.18929	0.643298	1.24141	1.02959	1.23178
7608	21900	DATA	53038	324	66	ref|NM_027756|ref|NM_001177881|ref|NM_001177882|ref|NM_001293769	mm|chr8:63150717-63150776	0	NA	1560	AGAAACACCTGCATTATTTATGAAAGCCATGTCTAATCTTAACTCCGAAAAGCTATGCAT	47752	0	A_51_P219166	Mfap3l	NM_027756	ref|Mus musculus microfibrillar-associated protein 3-like (Mfap3l), transcript variant 1, mRNA [NM_027756]	0.770132	0.147694	1.23214	0.269103	2.60685	3	0	0	0	0.883238	0.60304	0.824119	1.28964	1.27306	1.04347	1.0788	1.30795	0.000258	1.26121	1.48552	0.94968
7613	21930	DATA	53120	324	148	ref|NM_173441|ens|ENSMUST00000025243|ref|XM_006526292|ref|XM_011247009	mm|chr18:32256817-32256876	0	NA	2454	CCAAGAAAGGTATCAGTCGACTGGATAAACAGATGAGAAAGTTCACAGATATCAGGAAAA	47895	0	A_55_P2943490	Iws1	NM_173441	ref|Mus musculus IWS1 homolog (S. cerevisiae) (Iws1), mRNA [NM_173441]	0.963902	0.0280102	1.04725	0.0152939	4.5233	3	0	0	0	0.959773	0.938186	0.993748	1.00012	1.07444	1.22343	1.05957	0.857497	0.751504	1.03922	1.06488	1.03763
7635	22090	DATA	53492	327	28	ref|NM_001205331|ref|NM_001205332|ref|NM_008633|ref|NM_001205330	mm|chr9:109881508-109881567	0	NA	321	GAGTTTATTCCTCTCCTGGATGGTGATGAGAAAACCGGGAACTCAGAGTCCAAAAAGAAA	48283	0	A_55_P2921682	Map4	NM_001205331	ref|Mus musculus microtubule-associated protein 4 (Map4), transcript variant 3, mRNA [NM_001205331]	0.807389	0.220367	1.18384	0.070906	2.81664	2	0	0	0	0.898668	0.967451	0.556049	1.3724	1.12383	1.04977	0.807976	0.817946	0.85439	1.10514	1.24275	1.20363
7636	22091	DATA	53493	327	29	ref|NM_001077495|ref|NM_001024955|ens|ENSMUST00000035532|ens|ENSMUST00000055518	mm|chr13:102460448-102459406	0	NA	1627	GAGACATCTCAAGGGAAGAAGTGAATGAAAAACTCCGAGACACTGCTGATGGGACCTTTT	48285	0	A_52_P307938	Pik3r1	NM_001077495	ref|Mus musculus phosphatidylinositol 3-kinase, regulatory subunit, polypeptide 1 (p85 alpha) (Pik3r1), transcript variant 2, mRNA [NM_001077495]	0.796098	0.214805	1.20271	0.0408627	3.22093	2	0	0	0	0.919306	0.920923	0.548064	1.31109	0.978761	1.10179	0.806497	0.837951	0.96748	1.16205	1.20232	1.24377
7638	22101	DATA	53512	327	48	ref|NM_026866|ref|NM_001278218|ref|NM_001278219|ref|NM_001278220	mm|chr1_random:97348-97289	0	NA	602	TGCAACTTAATGGCACAGTTAAGTCATCCTTTCTGCCTTTAGACAACCAAAGAACACCTC	48320	0	A_66_P100639	Disp1	NM_026866	ref|Mus musculus dispatched homolog 1 (Drosophila) (Disp1), transcript variant 1, mRNA [NM_026866]	0.769516	0.186318	1.17522	0.195305	2.60332	3	0	0	0	0.596056	0.746025	0.966465	1.62484	1.13587	1.71336	0.83316	0.858155	0.000417	1.14976	1.382	0.99389
7673	22452	DATA	54347	332	63	ref|NM_011210|ref|NM_001111316|ref|NM_001268286|ens|ENSMUST00000188596	mm|chr1:140010344-140010285	0	NA	342	GGAACATTACTGTGAATTACACCTATGAATCTAGTAATCAGACTTTTAAGGCAGACCTCA	48927	0	A_52_P11901	Ptprc	NM_011210	ref|Mus musculus protein tyrosine phosphatase, receptor type, C (Ptprc), transcript variant 2, mRNA [NM_011210]	0.586316	0.229955	1.4709	0.203651	4.98796	3	0	0	0	0.375945	0.551191	0.831813	1.6005	1.37626	0.597388	0.991914	1.26197	0.000305	1.2691	1.46725	1.67635
7681	22501	DATA	54457	333	9	ref|NM_009615|ref|NM_001277266|ref|NM_001291871|ref|NR_120376	mm|chr12:21330604-21330545	0	NA	3216	ATCTACATTAAGAGCAGTCCTTTCCAAGAGGAACAGTTTATAGAAACAGCCACATGAACT	49129	0	A_52_P734595	Adam17	NM_009615	ref|Mus musculus a disintegrin and metallopeptidase domain 17 (Adam17), transcript variant 1, mRNA [NM_009615]	0.872467	0.0483448	1.11662	0.0735417	4.80504	3	0	0	0	0.927785	0.838319	0.851295	1.37204	1.17023	1.00334	0.951347	0.835417	0.700364	1.07138	1.07701	1.20148
7688	22581	DATA	54640	334	28	ens|ENSMUST00000109596|gb|AK169934|gb|AK146669|gb|AK172975	mm|chr11:20138450-20138391	0	NA	2109	TTGTTTATCCACGGGGATGGGAGTTAAGTCACTTTTACAAAATAAAATCTCAAGTAACTG	49168	0	A_66_P102076	Cep68	ENSMUST00000109596	ens|centrosomal protein 68 [Source:MGI Symbol;Acc:MGI:2667663] [ENSMUST00000109596]	0.838981	0.329812	1.18461	0.0768298	1.76776	2	0	0	0	1.08883	0.96297	0.465143	1.18249	1.13322	1.13932	0.791889	0.893698	0.788621	1.14932	1.13176	1.27274
7708	22813	DATA	55193	337	89	ref|NM_177073|ens|ENSMUST00000008462|ref|XM_006507932|ref|XM_006507936	mm|chr7:107994488-107994429	0	NA	2690	CCATATGTGTGATTGAATGTGTTCCCATAGTCATTCCAAAAAGTTGTCTAAAAAAGGGTA	49859	0	A_55_P2903239	Relt	NM_177073	ref|Mus musculus RELT tumor necrosis factor receptor (Relt), mRNA [NM_177073]	0.745572	0.303919	1.26115	0.152181	2.62736	2	0	0	0	0.840044	0.405637	0.991036	1.32944	0.818314	1.98891	1.06551	0.777403	0.000245	1.37841	1.08918	1.31587
7726	23005	DATA	55660	340	64	ref|NM_010942|ens|ENSMUST00000031009|ref|XM_006503773|gb|AX775765	mm|chr5:38529052-38528993	0	NA	1519	GCTGATGTGGCACCTTGCAAATAGAATATCTAAGTCCACAATCTTTGTAAGAAAAGTATG	50114	0	A_52_P467726	Nsg1	NM_010942	ref|Mus musculus neuron specific gene family member 1 (Nsg1), mRNA [NM_010942]	0.891078	0.0350588	1.10125	0.123104	2.84396	2	0	0	0	0.909505	0.850649	0.913082	1.16704	1.2272	1.04705	1.13355	0.996976	0.451208	1.08315	0.988196	1.2324
7744	23095	DATA	55875	341	115	ref|NM_001077707|ref|NM_001284354|ref|NM_172937|ens|ENSMUST00000160461	mm|chr10:10884388-10884447	0	NA	2000	TGTTCATGTGTCAGAAAATACATGTGTCTCTGAAGACAAGCAAACCCAAGAAGCAAAAGA	50503	0	A_51_P171347	Shprh	NM_001077707	ref|Mus musculus SNF2 histone linker PHD RING helicase (Shprh), transcript variant 1, mRNA [NM_001077707]	0.85031	0.228426	1.49411	0.330592	2.77503	3	0	0	0	0.830602	1.08795	0.632377	1.6612	0.93457	1.34173	0.000343	1.02854	0.000343	1.70476	1.66449	1.11309
7745	23098	DATA	55879	341	119	ref|NM_001290528|ens|ENSMUST00000138243|ens|ENSMUST00000133551|ens|ENSMUST00000108341	mm|chr7:28453537-28453478	0	NA	1250	GAGGCCATTGAGAACCACAACCTCGCTGACACGGTGCTCAAGATCACAGACTTCGGCCTT	50511	0	A_66_P103533	Map3k10	NM_001290528	ref|Mus musculus mitogen-activated protein kinase kinase kinase 10 (Map3k10), mRNA [NM_001290528]	0.892536	0.101241	1.08502	0.149548	1.84607	3	0	0	0	0.933855	0.77717	0.966583	1.08608	1.03395	1.23321	0.872108	0.969768	0.872224	1.25696	1.01292	0.985176
7759	23188	DATA	56106	343	18	ref|NM_009832|ref|XM_006515443|ref|XM_006515444|gb|AK138654	mm|chr12:109420407-109424633	0	NA	163	AGATCTTCAGAGGATTACAACATTCCAGAGTCCCACTGGGGAAGAACAAGATACTTCAAT	50624	0	A_55_P2935570	Ccnk	NM_009832	ref|Mus musculus cyclin K (Ccnk), mRNA [NM_009832]	0.797681	0.0431248	1.28617	0.23941	3.47811	2	0	0	0	0.794266	0.756365	0.842411	1.37559	1.38059	1.07129	0.885563	1.03525	0.000154	1.01412	1.46471	1.37969
7796	23585	DATA	57089	349	17	gb|M14215|gb|AK169887|gb|AK171289|tc|TC1581981	mm|chr1:172981722-172981647	0	NA	934	TTACAAGCAGGCCGGGATGTTTGGTTCTTCAATCACAACGACTTAGGATCACCAGTTCAA	51511	0	A_51_P328613	Fcgr3	M14215	gb|Mouse Fc gamma receptor (IgG 2.4G2 receptor mRNA, complete cds. [M14215]	0.747633	0.0631558	1.1897	0.349943	2.15325	2	0	0	0	0.731163	0.694343	0.817391	1.34997	1.10743	1.49059	0.994719	0.92975	0.315531	0.932601	1.04828	1.58822
7806	23669	DATA	57297	350	61	ref|NM_019937|ens|ENSMUST00000135719|ens|ENSMUST00000122919|ens|ENSMUST00000154585	mm|chr3:65750333-65750274	0	NA	1884	AAATGCCCTAGCAGTATCTAATTGAAAACCATGGTCAGGTTCAATTGTACTTTATTATAG	51595	0	A_66_P121676	Ccnl1	NM_019937	ref|Mus musculus cyclin L1 (Ccnl1), mRNA [NM_019937]	0.947416	0.0980627	1.11236	0.113111	1.90842	3	0	0	0	1.00562	0.834197	1.00243	1.45462	1.23665	1.09554	0.614626	0.916283	0.502955	1.24288	1.05116	1.04304
7818	23791	DATA	57581	352	17	ref|NM_021285|ref|NM_001113387|ens|ENSMUST00000150542|ens|ENSMUST00000119429	mm|chr1:66972798-66971597	0	NA	672	CTGCATCAACTATGAAGCTTTTGTCAAACACATCATGTCTGTCTAAACGGAGTTTTCAAG	51808	0	A_55_P2499158	Myl1	NM_021285	ref|Mus musculus myosin, light polypeptide 1 (Myl1), transcript variant 1f, mRNA [NM_021285]	0.537781	0.106151	1.40839	0.272927	5.14932	2	0	0	0	0.65989	0.467503	0.485951	1.33844	1.46689	1.59534	0.827327	0.571586	0.361886	1.11114	1.46636	1.64768
7835	23935	DATA	57940	354	48	ref|NM_001012400|ens|ENSMUST00000046260|gb|AK167445|gb|BC089614	mm|chr4:118899079-118899020	0	NA	530	TGACATGTCGTGGACTCCATATGAAGACGTGGAGAAGCAAGATGCTAAAATCGGCATGAT	52153	0	A_55_P2141311	AU022252	NM_001012400	ref|Mus musculus expressed sequence AU022252 (AU022252), mRNA [NM_001012400]	0.761244	0.166782	1.18028	0.0369576	4.24869	2	0	0	0	0.790603	0.581732	0.911397	1.51383	1.09849	1.59102	1.0554	0.91656	0.000123	1.14992	1.1695	1.22143
7837	23938	DATA	57947	354	55	ref|NM_172722|ens|ENSMUST00000151458|ens|ENSMUST00000172908|gb|AK041906	mm|chr5:121889431-121889490	0	NA	2759	GCACATCTGATTGCACTTAGACTTGAGGAGCTCACGTTAGAGGAAACTTCTATCTCTACG	52164	0	A_55_P2486239	Naa25	NM_172722	ref|Mus musculus N(alpha)-acetyltransferase 25, NatB auxiliary subunit (Naa25), mRNA [NM_172722]	0.824101	0.0741829	1.10823	0.0241397	6.30843	2	0	0	0	0.897958	0.82475	0.749596	1.08	1.21688	1.43689	0.986157	1.06384	0.419229	1.08137	1.12809	1.11524
7868	24170	DATA	58498	357	114	gb|AK136767|ens|ENSMUST00000150434|riken|9330003I22	mm|chrX:105932448-105932389	0	NA	1318	GGAAGAGTGCCCTTTGCTTTCTATATTATTTATCACTTACTCCTTAAAGCTACTTTCCAA	52863	0	A_55_P2229351	Gm10452	AK136767	gb|Mus musculus adult male diencephalon cDNA, RIKEN full-length enriched library, clone:9330003I22 product:hypothetical protein, full insert sequence. [AK136767]	0.794335	0.158465	1.14525	0.141832	2.85798	3	0	0	0	0.669784	0.740522	0.972698	1.38453	0.979481	1.22677	0.959713	1.07328	0.557475	1.15022	1.00099	1.28453
7873	24201	DATA	58572	358	24	ref|NM_001043355|ref|NM_010837|ens|ENSMUST00000107100|ens|ENSMUST00000068973	mm|chr7:106485587-106485646	0	NA	2274	CTGCATGAAACTGTGCTGTATAGTCTTGCTGGAATCTAATAAAATTGGTTCCTCTGGCTC	52701	0	A_55_P1958537	Map6	NM_001043355	ref|Mus musculus microtubule-associated protein 6 (Map6), transcript variant 3, mRNA [NM_001043355]	0.852579	0.0713117	1.04726	0.0713028	3.34368	4	0	0	0	0.934601	0.817873	0.805264	1.33983	1.33327	1.10904	0.797465	0.588707	1.13218	1.03365	1.12438	0.983735
7875	24210	DATA	58599	358	51	ref|NM_030702|ref|NM_001163571|ens|ENSMUST00000117504|ens|ENSMUST00000153516	mm|chr11:69487707-69487134	0	NA	1860	AATGAATGTGGCCAGGCAGAATAATGACAGTGACTGTGGTGCCTTTGTGTTACAGTACTG	52746	0	A_55_P1986386	Senp3	NM_030702	ref|Mus musculus SUMO/sentrin specific peptidase 3 (Senp3), transcript variant 1, mRNA [NM_030702]	0.890793	0.0261163	1.24817	0.373894	1.65151	2	0	0	0	0.898471	0.861699	0.91221	0.875969	0.925542	1.25684	0.909769	1.00278	0.612209	1.67558	1.08728	0.981655
7885	24289	DATA	58788	359	76	ref|NM_133721|ref|NM_001113514|ens|ENSMUST00000044165|ref|XM_006511918	mm|chr9:118807900-118807959	0	NA	4779	TACCTTCAGCTTTGTGTAGCCAAAAAAGCCATGAGTCTAAGCTGGTCCTAGGAGTCAAAC	53092	0	A_51_P382970	Itga9	NM_133721	ref|Mus musculus integrin alpha 9 (Itga9), transcript variant 1, mRNA [NM_133721]	0.829038	0.0979582	1.15734	0.111774	3.82595	3	0	0	0	0.84047	0.725866	0.920779	1.28803	1.17821	0.900755	1.08353	0.957471	0.632882	1.27578	1.14253	1.0537
7888	24298	DATA	58799	359	87	ref|NM_001302475|ref|NM_008876|ens|ENSMUST00000018429|ref|XM_011248795	mm|chr11:70371548-70371607	0	NA	3661	CTGCTGACAGACACTAACTTTGTACTGGTTCATCAAGCATTTCATAAATAAAAGTGTAGA	53109	0	A_55_P2049572	Pld2	NM_001302475	ref|Mus musculus phospholipase D2 (Pld2), transcript variant 1, mRNA [NM_001302475]	0.958457	0.160555	1.16738	0.0638545	2.09428	2	0	0	0	1.09499	0.99881	0.781575	1.2735	1.15724	1.04807	0.839817	0.881657	0.422196	1.09571	1.21822	1.18821
7894	24354	DATA	58934	360	58	gb|GU164735	mm|chr17:34737403-34737669	0	NA	324	TAGAGCTATACCCTCAATCTTCCCTATGTCCCTACAGGCTCTGTGGGCCCCGGAAAGCCA	53061	0	A_55_P2745215	Ager	GU164735	gb|Mus musculus advanced glycosylation end product-specific receptor variant 9 (Ager) mRNA sequence, alternatively spliced. [GU164735]	0.907018	0.183458	1.29371	0.0432425	3.55338	2	0	0	0	0.706481	1.06641	0.948161	1.00944	1.72456	1.68399	0.000518	0.978803	0.000518	1.32535	1.31133	1.24443
7896	24368	DATA	58964	360	88	ref|NM_001289580|ref|NM_001289579|ref|NM_001289577|ref|NM_172717	mm|chr5:110600898-110600957	0	NA	3252	CTTGCTCTTGATACAGACTGAGAGGCAGTACTCTGTGTTTGTGGGAGATGGTTCTTTTTT	53112	0	A_55_P1989251	Chfr	NM_001289580	ref|Mus musculus checkpoint with forkhead and ring finger domains (Chfr), transcript variant 5, mRNA [NM_001289580]	0.892214	0.123505	1.14269	0.0436378	3.31199	2	0	0	0	1.03307	0.802465	0.841108	1.16535	1.05486	1.12662	0.777317	0.980678	0.790477	1.12092	1.19293	1.11421
7897	24369	DATA	58966	360	90	ref|NM_030558|ens|ENSMUST00000118960|ens|ENSMUST00000150068|gb|AF231122	mm|chr16:17835428-17835369	0	NA	1045	GGTCCCTAGGTCCAGCAATGATTCTACAATAGTATTTCCCCAATAAATCGTGCATAGTGA	53115	0	A_55_P2154416	Car15	NM_030558	ref|Mus musculus carbonic anhydrase 15 (Car15), mRNA [NM_030558]	0.795949	0.148895	1.24148	0.14658	3.69337	3	0	0	0	0.916671	0.841603	0.629573	1.4125	1.13431	1.01625	0.495782	0.733676	1.09519	1.11379	1.40154	1.20911
7910	24479	DATA	59237	362	33	ref|NM_173866|ens|ENSMUST00000140189|ens|ENSMUST00000143846|ens|ENSMUST00000132932	mm|chr8:88043487-88045262	0	NA	1269	AACCAGGAGAGGAGTCCTTTGAGCAATTCAGCAGGGAAAAAGAATTCGTCCTTGGTAATC	53308	0	A_66_P123215	Gpt2	NM_173866	ref|Mus musculus glutamic pyruvate transaminase (alanine aminotransferase) 2 (Gpt2), mRNA [NM_173866]	0.72273	0.108201	1.26751	0.0829928	6.91959	3	0	0	0	0.638509	0.684917	0.844763	1.76056	1.25864	1.28689	0.773507	0.402689	0.546984	1.31706	1.1717	1.31377
7926	24601	DATA	59577	364	45	ref|NM_029022|ens|ENSMUST00000123621|ens|ENSMUST00000090811|ref|XM_006500313	mm|chr2:73169062-73169121	0	NA	997	TTTGTACCACACATTTCACCACTGTTGGATACAAAATCACCAACATTTGAACCTGAAAGG	53609	0	A_52_P99502	Scrn3	NM_029022	ref|Mus musculus secernin 3 (Scrn3), mRNA [NM_029022]	0.87712	0.0694777	1.21134	0.393855	1.44743	2	0	0	0	0.80777	0.876865	0.946724	0.998451	1.11736	1.1563	1.08835	0.780666	0.593497	1.66612	0.984135	0.983754
7930	24628	DATA	59665	364	133	ens|ENSMUST00000058162|gb|AK083165|gb|AK047224|tc|TC1597855	mm|chr11:120486524-120486465	0	NA	4829	CCCCCCGGGTATTTATTGCTGTACATAGTGTATGTTTGTGATATATAAGGTTTTCTTTAT	53758	0	A_55_P2047748	Mafg	ENSMUST00000058162	ens|v-maf musculoaponeurotic fibrosarcoma oncogene family, protein G (avian) [Source:MGI Symbol;Acc:MGI:96911] [ENSMUST00000058162]	0.836395	0.0589411	1.20173	0.0488444	8.26625	3	0	0	0	0.790713	0.815544	0.902927	1.28993	1.14245	1.00927	0.664253	0.903429	0.876291	1.24152	1.14722	1.21644
7938	24658	DATA	59731	365	35	ref|NM_001276361|ref|NM_001276360|ref|NM_001276359|ens|ENSMUST00000134970	mm|chr2:25789136-25785515	0	NA	4824	AGCCTCACAAGAATTCAATATTGGAGGAGCTGGAGAAGTGTGATGCCAACCACTATATTA	53872	0	A_66_P137221	Camsap1	NM_001276361	ref|Mus musculus calmodulin regulated spectrin-associated protein 1 (Camsap1), transcript variant 3, mRNA [NM_001276361]	0.958517	0.0836826	1.05277	0.0150646	1.91995	2	0	0	0	1.03061	0.866751	0.978189	1.52468	1.03872	1.36525	0.944574	0.637336	0.455587	1.03656	1.05542	1.06633
7943	24672	DATA	59769	365	73	ref|NM_010315|ref|NM_001285910|ref|NM_001285909|ref|NM_001038637	mm|chr14:20710543-20695134	0	NA	413	CAGCTGAAGATGGAAGCCAACATCGACAGGATAAAGGTGTCCAAGGCAGCTGCTGACTTG	53938	0	A_51_P220813	Gng2	NM_010315	ref|Mus musculus guanine nucleotide binding protein (G protein), gamma 2 (Gng2), transcript variant 1, mRNA [NM_010315]	0.729771	0.06097	1.60996	0.873796	1.74049	2	0	0	0	0.704889	0.799247	0.685176	1.36294	1.00385	1.86393	0.000753	0.748584	0.000753	2.56203	0.844636	1.42321
7960	24813	DATA	60068	367	44	ref|NM_001134426|ref|NM_001134427|ref|NM_175565|ref|NM_175833	mm|chr9:103257562-103257503	0	NA	1901	TAAACTTCAGCTAGACCACCAGTATGCTGTGCTTGAGAATCAGAAGTACAGCCACACACA	54176	0	A_55_P2509668	Cdv3	NM_001134426	ref|Mus musculus carnitine deficiency-associated gene expressed in ventricle 3 (Cdv3), transcript variant 3, mRNA [NM_001134426]	0.811717	0.108956	1.15059	0.308732	1.79277	2	0	0	0	0.68596	0.877807	0.871383	1.1799	1.49501	1.62505	1.27296	0.539949	0.000208	0.972081	1.50708	0.972602
7962	24815	DATA	60072	367	48	ens|ENSMUST00000154886|gb|BQ570449|tc|TC1647197	mm|chr19:55255258-55255428	0	NA	35	AGAAAGGCAGGAACATGAGCCACCGCCTGTGACACTCACATCCTCAGTGAACAACCGCGA	54183	0	A_55_P2928827	Tectb	ENSMUST00000154886	ens|tectorin beta [Source:MGI Symbol;Acc:MGI:109574] [ENSMUST00000154886]	1.26511	0.207166	0.788776	0.115725	3.4768	3	0	0	0	1.13021	1.50364	1.16148	0.741323	1.40282	1.80289	1.07034	0.820693	0.000277	0.674182	0.9056	0.786546
7963	24819	DATA	60079	367	55	ref|NM_029784|ens|ENSMUST00000034749|ref|XM_006511551|ref|XM_006511550	mm|chr9:69937901-69937842	0	NA	2098	GATATTTATATCCACCTAGGGGTACCGGCTTTTACTATTTAAAGCTATTTTTGAAACCAC	54196	0	A_51_P221510	Fam81a	NM_029784	ref|Mus musculus family with sequence similarity 81, member A (Fam81a), mRNA [NM_029784]	0.527503	0.318938	1.32042	0.171023	3.79492	3	0	0	0	0.229575	0.488981	0.863953	2.10368	0.569047	2.12244	0.835001	0.825817	0.00024	1.51546	1.1961	1.24971
7983	24958	DATA	60407	369	55	ref|NM_001081160|ens|ENSMUST00000073556|ens|ENSMUST00000171691|ref|XM_006525040	mm|chr17:29964963-29964904	0	NA	7505	CAAAATGTAACCTCTAGTTGCGGACGCGGTTGTTCCAATCAATAAAGATGCAGTGTTCTA	54493	0	A_55_P2184339	Mdga1	NM_001081160	ref|Mus musculus MAM domain containing glycosylphosphatidylinositol anchor 1 (Mdga1), mRNA [NM_001081160]	0.52761	0.313834	1.27681	0.203698	3.46833	3	0	0	0	0.512709	0.221493	0.848629	2.0857	0.757342	1.88532	1.11092	0.747274	0.00018	1.43024	1.0457	1.3545
7984	24966	DATA	60428	369	76	ref|NM_138646|ens|ENSMUST00000177121|ens|ENSMUST00000112359|ens|ENSMUST00000133708	mm|chr5:112807330-112807389	0	NA	2731	ACCGTTTACTTGAGATACCCATGGTGCTTTGTAACCGTATGGTGCCCAGTTCCAGTTTTA	54527	0	A_51_P324134	Hps4	NM_138646	ref|Mus musculus Hermansky-Pudlak syndrome 4 homolog (human) (Hps4), mRNA [NM_138646]	0.879024	0.0277561	1.04873	0.0361031	6.45452	3	0	0	0	0.903598	0.848919	0.884556	1.27853	1.18851	0.952283	0.833349	0.927283	1.03679	1.04969	1.08434	1.01215
7994	25003	DATA	60508	369	156	ref|NM_178608|ens|ENSMUST00000121469|gb|AK045056|gb|BC046826	mm|chr6:71760628-71760687	0	NA	3727	GGCTGAAGCTCTGCTGTTTTGTTATAATGCCTGATAAACATCTTGAATAAAGTCTTAACA	54669	0	A_55_P2011146	Reep1	NM_178608	ref|Mus musculus receptor accessory protein 1 (Reep1), mRNA [NM_178608]	0.896738	0.117449	1.15174	0.0900798	2.984	3	0	0	0	1.03236	0.828557	0.829303	0.956669	1.12669	1.25752	0.704446	0.828896	0.980338	1.11089	1.08932	1.25501
7998	25019	DATA	60539	370	23	ref|NM_001005767|ens|ENSMUST00000155832|ens|ENSMUST00000136252|ens|ENSMUST00000048642	mm|chr16:20282842-20280146	0	NA	1010	AAATTTTTTGATCATGCAGCCCATCTTGGGGGAGCTCTCTTTGGAATATGGTATATCACG	54436	0	A_55_P2740346	Parl	NM_001005767	ref|Mus musculus presenilin associated, rhomboid-like (Parl), mRNA [NM_001005767]	1.02458	0.0233565	0.971766	0.0277275	2.52307	3	0	0	0	1.02781	1.04615	0.999771	0.937919	0.992221	1.04669	1.06394	1.22356	0.746646	0.939752	0.988177	0.987368
8009	25090	DATA	60713	371	33	ref|NM_009813|ens|ENSMUST00000170638|ens|ENSMUST00000003554|gb|AK049865	mm|chr1:174140315-174140256	0	NA	1583	TCCCTCTCCGAGGAGAAAAGGAGCTGCTTTTTCTTAGATCCCAGCCCAGTTCTCTCATCT	54744	0	A_55_P2856642	Casq1	NM_009813	ref|Mus musculus calsequestrin 1 (Casq1), mRNA [NM_009813]	0.719039	0.24093	1.31817	0.0410286	4.24602	2	0	0	0	0.745906	0.94541	0.465802	0.787129	1.36503	1.87876	0.731128	1.12586	0.000467	1.31253	1.36173	1.28025
8026	25195	DATA	60932	372	88	ref|XM_011245136|gb|AK014089|gb|AK043487|tc|TC1721950	mm|chr14:119382417-119382358	0	NA	8257	CCAGAGTGCTGGACTCAAAGGTACTGATGACTCCGTGTGAGAAGCGAGAACTCTGGTGCT	54842	0	A_52_P27003	Uggt2	XM_011245136	ref|PREDICTED: Mus musculus UDP-glucose glycoprotein glucosyltransferase 2 (Uggt2), transcript variant X3, mRNA [XM_011245136]	0.889005	0.168936	1.17356	0.11721	2.39702	3	0	0	0	0.970625	1.00163	0.694758	1.0223	1.09688	1.18197	0.910195	1.04164	0.559313	1.25172	1.23016	1.03879
8085	25559	DATA	61794	377	130	ref|NM_010937|ens|ENSMUST00000128264|ens|ENSMUST00000029445|ref|XM_006501118	mm|chr3:102871695-102871754	0	NA	4327	GACCCTCATGAAGGGGCTGATATTTTAAGTTGACTGTTTGATTGTAAATTAATCCTTTCT	55807	0	A_55_P2826573	Nras	NM_010937	ref|Mus musculus neuroblastoma ras oncogene (Nras), mRNA [NM_010937]	0.953149	0.0531817	1.03011	0.0146209	2.41699	2	0	0	0	0.891921	0.979674	0.987851	1.03748	1.08936	1.10635	0.918696	0.903553	0.99476	1.01664	1.02804	1.04566
8094	25625	DATA	61939	378	111	ref|NM_001025309|ref|NM_144859|ens|ENSMUST00000024888|ens|ENSMUST00000172733	mm|chr17:64632424-64632365	0	NA	2636	GAAGACTGTGGTCACAACAGTAGTAGTACAACTTGGTTTCATTGAAAATAAACTGAATTC	55772	0	A_55_P1978795	Pja2	NM_001025309	ref|Mus musculus praja 2, RING-H2 motif containing (Pja2), transcript variant 1, mRNA [NM_001025309]	1.1109	0.0192778	0.986998	0.0513454	3.91283	2	0	0	0	1.09018	1.11421	1.1283	0.954534	0.966362	1.05809	1.08137	1.17612	0.469843	0.988004	0.935156	1.03783
8096	25629	DATA	61960	378	132	ref|NM_138668|ens|ENSMUST00000130412|ens|ENSMUST00000151983|ens|ENSMUST00000034051	mm|chr8:47082062-47082121	0	NA	1389	TGTGGATGGAAGAGTCCAGACTTTTGGAACAAGGATGCATACTATAACTTATGCCTTCCT	55812	0	A_51_P245454	Ufsp2	NM_138668	ref|Mus musculus UFM1-specific peptidase 2 (Ufsp2), mRNA [NM_138668]	0.987349	0.0167952	1.03686	0.0260824	2.76436	3	0	0	0	0.997599	0.996482	0.967966	1.07317	0.965584	1.06096	1.03088	0.991605	0.805175	1.03892	1.00981	1.06185
8102	25683	DATA	62104	379	112	ref|NM_028453|ens|ENSMUST00000097830|gb|AK014098|tc|TC1584542	mm|chr4:138454009-138453950	0	NA	767	GAAGACAAAAGGGGTGGACGTTAAAGATGGCCTGAGAGATGACGTGGAAGATGCTGTCCA	56074	0	A_66_P130798	Otud3	NM_028453	ref|Mus musculus OTU domain containing 3 (Otud3), mRNA [NM_028453]	0.471672	0.145381	0.89958	0.137482	3.70409	3	0	0	0	0.40992	0.367361	0.637736	0.940841	4.7195	0.837271	0.85155	0.536855	0.000223	1.0255	0.92035	0.752895
8123	25792	DATA	62359	381	39	ref|NM_030133|ens|ENSMUST00000095187|ref|XM_011246728|ref|XM_011246729	mm|chr17:86535845-86535786	0	NA	346	TTGGAAGAGAAAAGCCACAAGTTGCAGACGACAAAGACTCTTAAAACTGCAGCAAAAAAG	56236	0	A_55_P2172688	Srbd1	NM_030133	ref|Mus musculus S1 RNA binding domain 1 (Srbd1), mRNA [NM_030133]	0.865773	0.0310121	1.07626	0.0848679	4.0349	2	0	0	0	0.889822	0.876726	0.83077	1.16675	1.57653	1.05626	0.883393	0.530893	0.960065	0.993877	1.0715	1.16341
8135	25866	DATA	62526	382	42	ref|NM_026240|ens|ENSMUST00000070166|ref|XM_006525494|ref|XM_011246800	mm|chr18:56657022-56662255	0	NA	1354	GGTCCTCTGCCAAGAACTTACAGCTAACATAGTGAAATTGGAAAAGATACAAAACAACTT	56243	0	A_52_P465886	Gramd3	NM_026240	ref|Mus musculus GRAM domain containing 3 (Gramd3), mRNA [NM_026240]	0.892302	0.0229937	1.139	0.238878	1.78053	2	0	0	0	0.895226	0.867986	0.913694	0.948321	1.05936	1.58177	1.12007	0.768352	0.428222	1.03604	1.41209	0.968866
8138	25884	DATA	62565	382	81	gb|AK084992|gb|AK086585|riken|D430022A14|riken|D930039A15	mm|chr14:76834382-76834441	0	NA	3625	CATGAATATTACCTGTTGTCTTTTCTTATTCTGTGTATTCATACAGTGTACAACTTGGGG	56314	0	A_52_P51936	D430022A14Rik	AK084992	gb|Mus musculus 13 days embryo lung cDNA, RIKEN full-length enriched library, clone:D430022A14 product:unclassifiable, full insert sequence. [AK084992]	0.826927	0.140911	1.25161	0.232351	2.70691	3	0	0	0	0.774946	0.986445	0.719391	1.02026	1.01213	1.46052	0.490513	0.54648	1.23447	1.25568	1.48191	1.01726
8152	25957	DATA	62748	383	100	ref|NM_027211|ens|ENSMUST00000068515|gb|AK007692|gb|AJ306451	mm|chr15:58173534-58173475	0	NA	892	GATAAAGGCCAAGTTCCAGGAGAAGTATCAGAAGTCTCTCTCTGACATGGTTCACTCAGA	56635	0	A_52_P662711	Anxa13	NM_027211	ref|Mus musculus annexin A13 (Anxa13), mRNA [NM_027211]	0.865951	0.0334271	1.19644	0.269963	2.1043	2	0	0	0	0.904415	0.843935	0.849502	1.07877	1.03575	1.42065	0.874555	1.13811	0.264998	0.946928	1.15937	1.48302
8155	25961	DATA	62752	383	104	ref|NM_029409|ens|ENSMUST00000162794|ens|ENSMUST00000160786|ens|ENSMUST00000073025	mm|chr1:82748286-82748345	0	NA	1186	CGCTAGAGGTAACCTCAGCATTCACATATATTGTCTCAACACCTGGAAATATAAAGGATT	56641	0	A_66_P136234	Mff	NM_029409	ref|Mus musculus mitochondrial fission factor (Mff), mRNA [NM_029409]	1.06305	0.0336633	0.968397	0.0641995	2.26159	3	0	0	0	1.06039	1.0308	1.09796	0.910731	1.02982	1.21156	1.09316	1.21604	0.444345	0.902385	0.972191	1.03062
8159	26002	DATA	62859	384	47	gb|AK049931|gb|AK039448|riken|C630012L17|riken|A330044D13	mm|chr3:35993490-35993549	0	NA	3342	GATGTTACTACTATGTAATTGTCATACTATCCAGTAATCCTTCGATTTCAGTAGTTGTGG	56540	0	A_52_P73208	Acad9	AK049931	gb|Mus musculus adult male hippocampus cDNA, RIKEN full-length enriched library, clone:C630012L17 product:inferred: RIKEN cDNA 2600017P15 gene, full insert sequence. [AK049931]	1.0166	0.253522	1.54937	0.159348	3.08171	3	0	0	0	0.740271	1.23846	1.07106	0.784376	1.50009	2.01582	0.000601	0.000601	0.000601	1.43644	1.48004	1.73164
8170	26121	DATA	4010	25	74	ref|NM_009261|ens|ENSMUST00000028279|ref|XM_011239046|ref|XM_011239045	mm|chr2:37426787-37426728	0	NA	14948	ATGATAGAACTTTGCCTGTTGACTGTGTCATAGCCTTCAGTTAATGCCATGATGATGATC	3881	0	A_55_P2915740	Strbp	NM_009261	ref|Mus musculus spermatid perinuclear RNA binding protein (Strbp), mRNA [NM_009261]	0.694572	0.604741	1.47482	0.25205	2.06273	2	0	0	0	0.976556	1.10682	0.000339	1.08308	1.33174	1.57617	0.000339	1.50016	0.000339	1.2611	1.75277	1.41058
8171	26136	DATA	4509	28	81	ref|NM_029475|ref|NM_001290811|ref|NM_001290812|ens|ENSMUST00000110662	mm|chr2:120976923-120978200	0	NA	756	GAAGTTGGCATTGCATCTTGCCGAGATTCCAAACAGGGAAAAAGAAAATCAGATGCTGCT	4191	0	A_52_P622694	Adal	NM_029475	ref|Mus musculus adenosine deaminase-like (Adal), transcript variant 1, mRNA [NM_029475]	0.421565	0.375897	1.45233	0.235191	4.02638	3	0	0	0	0.540237	0.723804	0.000654	2.00163	1.35713	0.721025	1.289	1.00886	0.000654	1.45469	1.21597	1.68633
8175	26158	DATA	5400	33	152	ref|NM_023045|ens|ENSMUST00000167242|ens|ENSMUST00000022696|gb|AK135189	mm|chr14:71054144-71054085	0	NA	15026	AGTTCAAAAACAGCCTTGCTACATACCCAGACCTTGCTACATACCCAGACCTTGTTTTGG	5236	0	A_55_P2435613	Xpo7	NM_023045	ref|Mus musculus exportin 7 (Xpo7), mRNA [NM_023045]	0.479594	0.415221	1.39682	0.111585	3.69502	2	0	0	0	0.000341	0.707161	0.731282	1.91944	1.57777	1.1856	0.000341	0.629975	1.05762	1.51989	1.36835	1.30223
8179	26181	DATA	6220	38	152	ref|NM_011973|ens|ENSMUST00000021701|ens|ENSMUST00000070565|ref|XM_006515890	mm|chr12:112046068-112046009	0	NA	1632	TTGCAGCTCCAGAGCGGCTGCACTGAATGTTTCCGTTTAATATATTTGTAAAACCACCTT	5851	0	A_55_P2065529	Mok	NM_011973	ref|Mus musculus MOK protein kinase (Mok), mRNA [NM_011973]	0.592115	0.524757	1.16137	0.217307	1.73595	2	0	0	0	0.000223	0.77573	1.00039	1.29431	1.61088	1.56112	0.508551	1.27082	0.493883	1.04922	1.41184	1.02304
8195	26394	DATA	17438	107	54	ref|NM_009168|ref|NM_001159523|ens|ENSMUST00000044216|ref|XM_011246334	mm|chr17:56115810-56115870	0	NA	1300	GGACAAGGGGACCCATGACGCACAGACTTCTTTAATGCCCTCTAGTGGGGTGCTCCAGAT	16059	0	A_51_P374818	Shd	NM_009168	ref|Mus musculus src homology 2 domain-containing transforming protein D (Shd), transcript variant 2, mRNA [NM_009168]	0.548045	0.501937	1.41264	0.208051	2.75613	2	0	0	0	0.986553	0.657003	0.000579	1.19775	1.92682	1.6809	0.000579	1.31131	0.000579	1.1992	1.4239	1.61484
8198	26417	DATA	18919	116	59	ref|NM_153556|ens|ENSMUST00000128337|ens|ENSMUST00000135246|ens|ENSMUST00000027267	mm|chr1:53331965-53324767	0	NA	394	AACTTATGGTTTTCGTGGTGAAGCCTTGGGGTCAATATGTAATGTTGCGGAGGTGGTAGT	17251	0	A_55_P2646028	Pms1	NM_153556	ref|Mus musculus postmeiotic segregation increased 1 (S. cerevisiae) (Pms1), mRNA [NM_153556]	0.624799	0.559628	1.41458	0.279945	2.18611	2	0	0	0	0.792042	1.08174	0.000616	1.57176	1.19371	0.836215	1.16444	1.11513	0.000616	1.28257	1.73612	1.22505
8209	26556	DATA	26498	162	94	gb|AF032130	mm|chr17:10507499-10507440	0	NA	3238	TAGTATCCAAAAGGGAAGCAGAGTCCTGTGACAAAATCTGACAAGTATAACCCTGCGCTG	24087	0	A_55_P2271058	Dep1	AF032130	gb|Mus musculus diabetic embryopathy (Dep-1) mRNA. [AF032130]	0.652447	0.613545	1.44103	0.144379	2.16699	2	0	0	0	0.738349	1.21851	0.000477	1.72852	1.2571	1.47073	0.000477	1.26227	0.000477	1.35139	1.60758	1.36412
8220	26666	DATA	30318	185	142	gb|AK007781|tc|TC1616934|riken|1810045C04|nap|NAP022082-001	mm|chr17:26395167-26395226	0	NA	597	TGACTCATATAGTCCATGTGGTAGCACTTGTTATGTAGTCAATTACAATCTTGAACTCTT	27708	0	A_55_P2727277	Luc7l	AK007781	gb|Mus musculus 10 day old male pancreas cDNA, RIKEN full-length enriched library, clone:1810045C04 product:Luc7 homolog (S. cerevisiae)-like, full insert sequence. [AK007781]	0.542035	0.472768	1.34429	0.533729	1.94885	3	0	0	0	0.750972	0.874338	0.000796	2.55816	0.819037	0.847549	0.000796	1.4916	0.623892	0.989316	1.95808	1.08546
8225	26727	DATA	32029	196	49	ens|ENSMUST00000150222|gb|AK038655|riken|A230052M14	mm|chr14:61823638-61823697	0	NA	4632	CTGCAGAATGGCTAAAAGTTCCGTGCCTTAGTACAAGACTGATCAATCCTGAAAACATGG	28980	0	A_55_P2646618	Sacs	ENSMUST00000150222	ens|sacsin [Source:MGI Symbol;Acc:MGI:1354724] [ENSMUST00000150222]	0.448997	0.403084	1.68139	0.395863	3.77823	3	0	0	0	0.780712	0.565896	0.000385	1.70506	1.08306	0.763238	1.03464	1.02246	0.000385	1.23728	1.80974	1.99715
8226	26733	DATA	32101	196	121	ref|NM_015790|ens|ENSMUST00000105393|gb|AK041421|gb|AK220220	mm|chr10:77541662-77541721	0	NA	2139	AATGAGTGTAGAGAGAACTACTTAAGTCCTTCCCGAGTACAAAGCATTACCTACCTGCAG	29100	0	A_55_P2747083	Icosl	NM_015790	ref|Mus musculus icos ligand (Icosl), mRNA [NM_015790]	0.546589	0.479186	1.23833	0.251398	2.21415	3	0	0	0	0.740728	0.898241	0.000797	0.87592	1.69338	2.2946	0.000797	1.77974	0.000797	0.94873	1.40041	1.36586
8238	26859	DATA	36453	223	45	ref|NM_021423|ens|ENSMUST00000154240|ens|ENSMUST00000039074|ref|XM_006521224	mm|chr15:89355661-89361789	0	NA	1565	CTGTGTGGAAGAAGTGCAGATGCGACAGTATGACACCCGGCATGAAACCAGAGAGGACCG	33077	0	A_55_P2745254	Shank3	NM_021423	ref|Mus musculus SH3/ankyrin domain gene 3 (Shank3), mRNA [NM_021423]	0.569768	0.492783	1.72233	0.507847	2.82109	3	0	0	0	0.861119	0.847379	0.000806	1.36599	1.36666	2.38864	0.000806	0.000806	0.000806	1.20608	2.22133	1.73957
8240	26933	DATA	39461	241	101	ref|NM_001164763|ens|ENSMUST00000054825|gb|AK077393|gb|AV244583	mm|chr3:67282978-67282919	0	NA	1240	GCTAATCTCAGGCAAATATTTCCTTTTAGCGTGATACCCACTTTCGAATAAGTGTTTATA	35794	0	A_55_P2932650	Rarres1	NM_001164763	ref|Mus musculus retinoic acid receptor responder (tazarotene induced) 1 (Rarres1), mRNA [NM_001164763]	0.571614	0.51504	1.29684	0.0479299	2.42841	2	0	0	0	0.000407	0.71384	1.0006	1.09279	1.56462	1.78748	0.768412	1.18092	0.000407	1.31362	1.24278	1.33413
8244	26969	DATA	41842	256	22	ref|NM_009677|ref|NM_001301211|ens|ENSMUST00000172892|ens|ENSMUST00000034171	mm|chr8:112367339-112368229	0	NA	1566	GTGAGCCAGAATTTAAAGCTGATTGTGCATCTGGAATCTTCCTTGCTGCAGAAAAGTACG	37707	0	A_55_P2637326	Ap1g1	NM_009677	ref|Mus musculus adaptor protein complex AP-1, gamma 1 subunit (Ap1g1), transcript variant 1, mRNA [NM_009677]	0.450526	0.400066	1.74378	0.683268	2.82906	3	0	0	0	0.584661	0.766288	0.000628	2.38157	0.905518	1.12274	0.000628	1.00602	0.000628	1.11489	2.47081	1.64564
8245	26974	DATA	41985	257	1	ref|NM_011884|ref|NM_001305273|ens|ENSMUST00000029942|ens|ENSMUST00000108153	mm|chr4:33455579-33455638	0	NA	1285	TTCGTCTACAGTGTATTGAACGTGAAATTATAAGTCCACGACATGAAAAAATGAAGACTG	37953	0	A_52_P466799	Rngtt	NM_011884	ref|Mus musculus RNA guanylyltransferase and 5'-phosphatase (Rngtt), transcript variant 1, mRNA [NM_011884]	0.765188	0.662192	1.31482	0.0915896	1.42409	2	0	0	0	1.15488	1.14008	0.000602	1.10419	1.49166	1.13581	1.2106	0.817102	0.000602	1.32252	1.21963	1.40232
8249	27005	DATA	43644	267	20	gb|AK155420|gb|AK169472|riken|F630226B12|riken|A630031G14	mm|chr16:36880223-36880282	0	NA	4998	CCAACATCATATACCATACGGACTATATAGCTATCAATAAAACTTCCTAATGGATGGCTT	39448	0	A_55_P2134992	Golgb1	AK155420	gb|Mus musculus NOD-derived CD11c +ve dendritic cells cDNA, RIKEN full-length enriched library, clone:F630226B12 product:hypothetical protein, full insert sequence. [AK155420]	0.709722	0.619794	1.50604	0.179987	2.13708	2	0	0	0	1.14953	0.978766	0.000869	1.12781	0.808942	2.45976	0.000869	0.954443	0.000869	1.29937	1.62838	1.59038
8252	27056	DATA	45525	278	97	ens|ENSMUST00000018884|gb|AK035739|tc|TC1600528|riken|9530097O21	mm|chr11:68787730-68787789	0	NA	3510	AAGATTCAGACCTCAAGCCTTGATACCTAACCCGAGGATTACGGTTCTAATCCCCTCAAA	41056	0	A_52_P590756	Slc25a35	ENSMUST00000018884	ens|solute carrier family 25, member 35 [Source:MGI Symbol;Acc:MGI:1919248] [ENSMUST00000018884]	0.604664	0.533541	1.21636	0.00553691	1.98566	2	0	0	0	1.01034	0.803372	0.000283	1.71811	1.13984	1.97335	0.458195	0.45843	0.789009	1.21612	1.21094	1.22201
8258	27200	DATA	52005	318	17	ref|NM_001013817|ens|ENSMUST00000080204|ref|XM_011249732|ref|XM_011249823	mm|chr1:87507329-87507388	0	NA	667	TGTAGGAACCTGCTCCCAGTGGATAGAGTCGTGTACGACATCCTCAGCAATGTACAGAAG	46786	0	A_55_P2137121	Sp140	NM_001013817	ref|Mus musculus Sp140 nuclear body protein (Sp140), mRNA [NM_001013817]	0.540467	0.525733	1.47357	0.200413	2.87251	2	0	0	0	0.569762	1.05094	0.000699	1.07628	0.979597	2.26029	0.000699	1.64033	0.000699	1.24546	1.6214	1.55384
8261	27209	DATA	52366	320	50	ref|NM_030726|ens|ENSMUST00000075296|gb|AF295365|gb|BC116696	mm|chr17:13070525-13070584	0	NA	1625	CCTACCTGAACATGCTGTCCACTATAAACTGCAGCATCAACCCAATTGTCTACTTTGTGG	47141	0	A_51_P284526	Mrgprh	NM_030726	ref|Mus musculus MAS-related GPR, member H (Mrgprh), mRNA [NM_030726]	0.513708	0.469342	1.18479	0.285319	2.1162	3	0	0	0	0.000404	0.619791	0.920929	2.45794	0.735665	1.50249	0.000404	1.5963	0.611707	1.51007	1.06746	0.976845
8265	27269	DATA	55342	338	74	ref|NM_022319|ens|ENSMUST00000035027|ref|XM_006511334|gb|AK220500	mm|chr9:97344893-97344834	0	NA	4271	ACAAACTGATTCATGTTGGTGGTCATTACGACACTTCTGTGAATTGGTTGAATAAATATG	49831	0	A_52_P424784	Clstn2	NM_022319	ref|Mus musculus calsyntenin 2 (Clstn2), mRNA [NM_022319]	0.652667	0.566618	1.39846	0.204496	2.14437	2	0	0	0	0.931869	1.0255	0.000629	1.32135	1.92249	0.794961	0.000629	1.80656	0.000629	1.44252	1.17552	1.57733
8272	27326	DATA	58734	359	22	ref|NM_001110516|ens|ENSMUST00000179919|ref|XM_011250249|ref|XM_006538844	unmapped	0	NA	1102	GAAAAGGGGAGCCTTGGTGTCCAGCCCAGCCAACCCAAGGAGACGACAGGGGCTGGCCTC	52996	0	A_66_P120570	Samd11	NM_001110516	ref|Mus musculus sterile alpha motif domain containing 11 (Samd11), mRNA [NM_001110516]	0.596825	0.516951	1.66785	0.476014	2.6398	3	0	0	0	0.919247	0.870669	0.000561	0.784723	1.94406	1.32142	0.000561	1.15466	0.000561	2.00525	1.87493	1.12337
8275	27338	DATA	59587	364	55	ref|NM_178766|ref|NM_001289596|ref|NM_001289595|ens|ENSMUST00000198119	mm|chr5:8449634-8449693	0	NA	1048	CCATTTGATGTAGTAAAAACACAGAAACAGACGCAACTGTGGACGAATGAATATTGTAAA	53627	0	A_55_P2731836	Slc25a40	NM_178766	ref|Mus musculus solute carrier family 25, member 40 (Slc25a40), transcript variant 1, mRNA [NM_178766]	0.48413	0.449349	1.26414	0.203105	2.73972	2	0	0	0	0.562908	0.888881	0.000602	1.96025	1.12451	1.52458	0.995668	1.14958	0.000602	1.35463	1.03151	1.40627
8276	27371	DATA	62013	379	21	ref|NM_001142747|ref|NM_001142748|ens|ENSMUST00000177420|ens|ENSMUST00000125006	mm|chr10:73969284-73969343	0	NA	3892	GTGGAATCTGGAACTAGAACTGGGTCCTCTACAAGAGCAGCAAGTGTTCCTATCCACTGA	55908	0	A_55_P2176181	Pcdh15	NM_001142747	ref|Mus musculus protocadherin 15 (Pcdh15), transcript variant M, mRNA [NM_001142747]	0.300634	0.261467	0.70015	0.102846	2.46286	2	0	0	0	0.476566	0.425156	0.000181	0.677234	6.18285	0.938508	0.641502	0.557376	0.000181	0.593409	0.798599	0.708442
8278	27388	DATA	62842	384	30	ref|NM_183021|ens|ENSMUST00000047524|ref|XM_006524281|ref|XM_011246460	mm|chr17:84836012-84835953	0	NA	2390	CTGGGTCTTCCTACTCGACTAGATTTTCAGCTTTAACTATCTTAGGATCAGTAGCTGAAG	56511	0	A_52_P168482	Thada	NM_183021	ref|Mus musculus thyroid adenoma associated (Thada), mRNA [NM_183021]	0.713611	0.634543	1.46702	0.217658	1.94525	2	0	0	0	0.923659	1.2165	0.000677	1.34458	1.23963	1.27687	0.000677	1.01168	0.584664	1.70005	1.43204	1.26897
8282	27414	DATA	5104	32	20	ens|ENSMUST00000164606|gb|AK164032|riken|C430022B06	mm|chr2:18228366-18228307	0	NA	2748	GCAATAAGAGTTTAGTCTGCTATTACACTTATAGGCCTAACTAGTAAAAAGGAACATGGT	4691	0	A_55_P2716546	Dnajc1	ENSMUST00000164606	ens|DnaJ (Hsp40) homolog, subfamily C, member 1 [Source:MGI Symbol;Acc:MGI:103268] [ENSMUST00000164606]	0.315335	0.545458	1.5093	0.556357	2.65422	3	0	0	0	0.945175	0.000414	0.000414	1.98977	2.38607	0.821764	0.000414	1.32766	0.000414	2.09817	0.992469	1.43727
8283	27418	DATA	5475	34	63	ens|ENSMUST00000148315|gb|AK042467|tc|TC1599321|riken|A630094L07	mm|chr2:22711504-22711563	0	NA	3958	ATCAAACAAGACTTTAAGGCCTAGTCACGTAGTCAGACATTTGAAACATATATTACCAAG	5071	0	A_52_P300981	Apbb1ip	ENSMUST00000148315	ens|amyloid beta (A4) precursor protein-binding, family B, member 1 interacting protein [Source:MGI Symbol;Acc:MGI:1861354] [ENSMUST00000148315]	0.280481	0.484692	1.13147	0.172875	2.86429	2	0	0	0	0.840155	0.000644	0.000644	2.60148	1.68192	1.01774	0.000644	0.686019	1.77634	1.19854	0.935115	1.26077
8284	27419	DATA	5693	35	117	gb|CA495740	mm|chr4:150465375-150465434	0	NA	599	ACAGACTCTCCTGACTTGCAAAGGCTGAACACTACGCTGGCTTTTAATCCTCAGAAACAA	5476	0	A_55_P2025323	Gm13090	CA495740	gb|AGENCOURT_10826672 NIH_MGC_156 Mus musculus cDNA clone IMAGE:6787664 5', mRNA sequence [CA495740]	0.311907	0.539058	1.79336	0.299517	4.16092	3	0	0	0	0.934358	0.000682	0.000682	1.55518	0.782135	1.94767	0.000682	1.39785	0.000682	2.13852	1.63981	1.60176
8285	27420	DATA	5948	37	44	ref|NM_010048|ref|NM_001109750|ens|ENSMUST00000155611|ens|ENSMUST00000117082	mm|chr16:17856886-17849870	0	NA	1021	CCGAGAGCTGCTCTGAGAAGTCTTCGTTTCTGTGTAAAAGAAGTCAGACGTGTGTTGATA	5646	0	A_66_P105657	Dgcr2	NM_010048	ref|Mus musculus DiGeorge syndrome critical region gene 2 (Dgcr2), transcript variant 1, mRNA [NM_010048]	0.246956	0.426559	1.29495	0.307194	3.45313	3	0	0	0	0.739503	0.000682	0.000682	2.19344	2.0169	1.51346	0.6304	1.0194	0.000682	1.52938	1.40828	0.947192
8287	27429	DATA	8186	50	150	ens|ENSMUST00000197522|gb|AK137494|gb|AK080244|tc|TC1594314	mm|chr5:20764790-20764849	0	NA	2713	TGACTCTTCTTTGGGTCCTAAGAGGCCTTTGAAAACCGATTGTCCAACTGTCCAGAAACA	7637	0	A_51_P434036	Gsap	ENSMUST00000197522	ens|gamma-secretase activating protein [Source:MGI Symbol;Acc:MGI:2442259] [ENSMUST00000197522]	0.401682	0.694514	1.68843	0.489376	2.62323	3	0	0	0	0.000704	1.20364	0.000704	1.4019	1.98143	0.749751	0.000704	1.59517	0.000704	1.4324	1.38019	2.25271
8290	27446	DATA	10390	64	58	ref|XM_006509864|ref|XM_011242364|ref|XM_011242365|ref|XM_006509863	mm|chr9:8076537-8076478	0	NA	7809	AAATTTTGTACAAGTATATAAGAAACTTATTATTAATAACATCCCCATAAATAATAAAGC	9526	0	A_66_P133553	Cep126	XM_006509864	ref|PREDICTED: Mus musculus cDNA sequence AK129341 (AK129341), transcript variant X4, mRNA [XM_006509864]	0.308159	0.531979	1.40669	0.228956	3.28531	2	0	0	0	0.922436	0.00102068	0.00102068	1.72919	1.43745	2.00988	0.00102068	1.67689	0.00102068	1.64584	1.38472	1.18951
8294	27455	DATA	11855	73	47	gb|DV065341	unmapped	0	NA	841	AGAAGGTTAAAGGATTTTCAAAATAAAGCGAAGGGAAGCACAGGGGCCTCACCATGCAAG	11007	0	A_55_P2395732	2810427A07Rik	DV065341	gb|NEONATAL_25_H23.x1 FH NEONATAL Mus musculus cDNA clone NEONATAL_25_H23 similar to Protein phosphatase 1 regulatory subunit 10, mRNA sequence [DV065341]	0.259318	0.448226	1.21155	0.356149	2.88095	3	0	0	0	0.000534	0.776885	0.000534	4.50593	0.967433	1.41887	0.000534	0.694077	0.000534	1.59562	1.14685	0.892193
8296	27470	DATA	13445	82	161	ref|NM_177727|ens|ENSMUST00000058764|ref|XM_006500617|ref|XM_006500618	mm|chr2:179769248-179769307	0	NA	1615	GTTTTGGTATTTTGCAAAAAGGTTTCTATAGGCAAAGGCTCAATCCTCACTTTGTAACTT	12396	0	A_55_P1987131	Lsm14b	NM_177727	ref|Mus musculus LSM14 homolog B (SCD6, S. cerevisiae) (Lsm14b), mRNA [NM_177727]	0.31499	0.544472	1.74048	0.369755	3.75143	3	0	0	0	0.000639	0.943692	0.000639	1.79477	0.885143	1.27529	0.000639	1.36151	0.516236	2.12211	1.71546	1.38387
8300	27486	DATA	17790	109	78	ref|NM_182841|ens|ENSMUST00000063192|ref|XM_006534877|ref|XM_011249426	mm|chr5:100507495-100507436	0	NA	2479	ACAGCCCGGAATGTAATGTGGAAAACGTTGTTTTGTAAATTCACCCTGAAGTATAGCTTC	16396	0	A_51_P154379	Tmem150c	NM_182841	ref|Mus musculus transmembrane protein 150C (Tmem150c), mRNA [NM_182841]	0.425578	0.736028	1.84574	0.406858	2.92486	3	0	0	0	1.27547	0.000632	0.000632	1.53262	1.86083	1.06649	0.000632	0.724854	0.000632	1.49761	1.7466	2.293
8304	27520	DATA	25734	157	150	ref|NM_010127|ref|NM_001304965|ens|ENSMUST00000176492|ens|ENSMUST00000177335	mm|chr15:100408058-100407999	0	NA	2265	AATGTTTTCTCCCGCAAACCAAGTTGGAAGGAAGCAAGAGTAAACTCTCTCACCCTGGAG	23596	0	A_66_P129349	Pou6f1	NM_010127	ref|Mus musculus POU domain, class 6, transcription factor 1 (Pou6f1), transcript variant 2, mRNA [NM_010127]	0.317002	0.546946	1.54226	0.327745	3.32829	3	0	0	0	0.0012225	0.0012225	0.948561	2.28405	2.25094	0.962518	0.0012225	0.0012225	0.922278	1.89488	1.24695	1.48494
8305	27532	DATA	27118	166	58	ref|NM_009198|ref|NM_001170638|ref|NR_121611|ens|ENSMUST00000006785	mm|chr13:23970331-23970390	0	NA	822	GTATTGTTGGGTGTGTTCTGAGTCTTTCCTGGTTCTTTCTATTCTTTGATGACCCCAAGG	24613	0	A_66_P124750	Slc17a1	NM_009198	ref|Mus musculus solute carrier family 17 (sodium phosphate), member 1 (Slc17a1), transcript variant 1, mRNA [NM_009198]	0.077555	0.134058	0.330182	0.0742484	2.85529	3	0	0	0	0.000157	0.232352	0.000157	0.203316	8.44322	0.325854	0.78612	0.278874	0.739402	0.367417	0.244684	0.378444
8306	27537	DATA	27469	168	81	ref|NM_001290708|ref|NM_053123|ens|ENSMUST00000101616|ens|ENSMUST00000077569	mm|chrX:45204898-45204840	0	NA	2152	CACATGTTTTTGCCTGTAAAGAAAGTGAGCTGACAGATGAGGACATTGTAACTATTCTGT	24943	0	A_55_P2731966	Smarca1	NM_001290708	ref|Mus musculus SWI/SNF related, matrix associated, actin dependent regulator of chromatin, subfamily a, member 1 (Smarca1), transcript variant 2, mRNA [NM_001290708]	0.377984	0.653069	1.47493	0.14318	2.84178	2	0	0	0	0.000934	1.13208	0.000934	2.38251	1.05555	2.04538	0.000934	0.955964	0.000934	1.51282	1.59535	1.31661
8318	27600	DATA	35474	217	50	gb|AK045604|riken|B230214O09	mm|chr6:49204956-49204897	0	NA	1506	CACAGCAGCAAAAACAAATGATATACCTGAGGGCCTTTGTTGTTGGTTTTTGTTTATTTT	32214	0	A_55_P2251121	B230214O09Rik	AK045604	gb|Mus musculus adult male corpora quadrigemina cDNA, RIKEN full-length enriched library, clone:B230214O09 product:unclassifiable, full insert sequence. [AK045604]	0.26502	0.458216	1.67346	0.16892	4.99528	2	0	0	0	0.000469	0.794122	0.000469	1.7152	1.33356	1.28044	0.000469	0.569362	1.28552	1.51383	1.65621	1.85035
8321	27626	DATA	39677	242	153	ref|NM_146198|ens|ENSMUST00000033035|ref|XM_011241766|ref|XM_011241768	mm|chr7:130416704-130416763	0	NA	2279	GATACTTCGCATAACTCAGGGTGAGCCAGGAAACGACAATAAAGCTGTGTCTGTTTACTG	35884	0	A_55_P2101088	Slc5a11	NM_146198	ref|Mus musculus solute carrier family 5 (sodium/glucose cotransporter), member 11 (Slc5a11), mRNA [NM_146198]	0.313898	0.541997	1.68387	1.10619	1.92629	2	0	0	0	0.939742	0.000976	0.000976	1.22962	2.51536	2.25878	0.000976	0.000976	0.000976	1.1374	2.95695	0.957268
8328	27679	DATA	48438	296	58	ref|NM_001085440|ens|ENSMUST00000056907|gb|AK164045|gb|BC094221	mm|chr11:60598780-60598839	0	NA	4381	AGCTGCTCGTGTGCATGGAATGCTTCTTGTAATCTTGAAAATGTGAGACCTTTTAAAAAA	43620	0	A_55_P2127592	Smcr8	NM_001085440	ref|Mus musculus Smith-Magenis syndrome chromosome region, candidate 8 homolog (human) (Smcr8), transcript variant 1, mRNA [NM_001085440]	0.303397	0.52352	1.44559	0.191416	3.54913	2	0	0	0	0.00114334	0.907906	0.00114334	1.93701	2.26095	1.0674	0.00114334	1.48539	0.00114334	1.50444	1.23166	1.60067
8329	27688	DATA	49751	304	59	ref|NM_177805|ens|ENSMUST00000066296|ref|XM_006516023|ref|XM_006516022	mm|chr12:66077767-66077826	0	NA	2372	AAAGGTCATCAAGAAACTTATTTCAGAGTAGTCGGGACTTTAACTCAGAGTCAGTTCCTA	44805	0	A_51_P281447	Fam179b	NM_177805	ref|Mus musculus family with sequence similarity 179, member B (Fam179b), mRNA [NM_177805]	0.402608	0.695847	1.69012	0.60665	2.41565	3	0	0	0	0.00086	1.2061	0.00086	0.651883	1.53093	2.20999	0.00086	1.32729	0.00086	1.28713	2.38782	1.39541
8330	27712	DATA	55124	337	20	gb|AK165915|gb|BB813391|riken|G730018P09	mm|chr7:19875363-19875423	0	NA	3520	ATGGTTATTGGGGATTGAACTCAGCACCTCTGAAGAGCAGCCAATGCTTTTAACCTCTGA	49736	0	A_55_P2823980	Rtn2	AK165915	gb|Mus musculus lung RCB-0558 LLC cDNA, RIKEN full-length enriched library, clone:G730018P09 product:reticulon 2 (Z-band associated protein), full insert sequence. [AK165915]	0.224972	0.388375	2.09895	1.0877	2.81033	2	0	0	0	0.673429	0.000744	0.000744	1.42238	0.8334	1.54825	1.22272	0.000744	0.000744	2.58124	2.86212	0.853489
8333	27736	DATA	62448	381	128	ref|NM_001290521|ref|NM_023597|ref|NM_001290522|ens|ENSMUST00000030087	mm|chr4:62116978-62116919	0	NA	1117	AATGTGTGAGTATAAGGGGCATTTCCAGACAGTTGCATCCTGTGTCTTTCTACCGAAGTC	56401	0	A_55_P2134218	Wdr31	NM_001290521	ref|Mus musculus WD repeat domain 31 (Wdr31), transcript variant 1, mRNA [NM_001290521]	0.334334	0.577322	2.08701	0.734445	3.24958	3	0	0	0	1.00097	0.00101681	0.00101681	2.22597	1.33796	1.169	0.00101681	0.00101681	0.00101681	1.92601	1.44642	2.8886
8338	27750	DATA	4585	28	157	ref|NM_144818|ens|ENSMUST00000175885|ens|ENSMUST00000152806|ens|ENSMUST00000110387	mm|chr2:126934341-126934282	0	NA	1817	GACCCTTGACCTTGAGTCTGATCCAAAGACAACACAAGAGAATGGTCACATTTCTCCTGA	4336	0	A_52_P363039	Ncaph	NM_144818	ref|Mus musculus non-SMC condensin I complex, subunit H (Ncaph), mRNA [NM_144818]	0.00195586	0	1.69497	1.47553	1.98734	2	0	0	0	0.00195586	0.00195586	0.00195586	2.45134	2.24858	2.20344	0.00195586	0.00195586	0.00195586	0.00195586	2.37571	2.70723
8339	27752	DATA	5033	31	113	ref|NM_008018|ref|NM_001164717|ens|ENSMUST00000081619|ens|ENSMUST00000111800	mm|chr19:47344404-47344345	0	NA	1624	TAGAATACTACACCATTGCTGAATTCCAGTCCTGCATTTCTGACGGGATCAGCTTTCGAG	4864	0	A_55_P2733207	Sh3pxd2a	NM_008018	ref|Mus musculus SH3 and PX domains 2A (Sh3pxd2a), transcript variant 1, mRNA [NM_008018]	0.00228155	0	1.09666	1.89553	1	2	0	0	0	0.00228155	0.00228155	0.00228155	3.33867	2.73463	2.62302	0.00228155	0.00228155	0.00228155	0.00228155	0.00228155	3.28543
8340	27753	DATA	6333	39	101	gb|AK085288|gb|BX527833|tc|TC1613054|riken|D630005H13	mm|chr11:96127919-96127978	0	NA	667	TGCTTCTTTGAGGACTACTTAGAAACCCAAACAGGCAACAGAAGCCTGGCCACCTTCCCT	6058	0	A_66_P135867	AK085288	AK085288	gb|Mus musculus 0 day neonate kidney cDNA, RIKEN full-length enriched library, clone:D630005H13 product:unclassifiable, full insert sequence. [AK085288]	0.0014917	0	1.0478	0.906377	1.99945	2	0	0	0	0.0014917	0.0014917	0.0014917	1.61899	3.32277	1.3802	0.0014917	2.52719	0.0014917	0.0014917	1.59227	1.54963
8342	27755	DATA	6829	42	105	ref|NM_001034874|ens|ENSMUST00000123454|ref|XM_011249094|ref|XM_006533619	mm|chr11:66025358-66025299	0	NA	7355	CACACCCTATGTGTACTGTAAACAGAGATTGCTTCAGTAAGATTTAGTCTTAAGGATTTT	6370	0	A_55_P2154749	Shisa6	NM_001034874	ref|Mus musculus shisa family member 6 (Shisa6), mRNA [NM_001034874]	0.00074	0	1.32618	1.19393	1.92284	2	0	0	0	0.00074	0.00074	0.00074	1.62099	3.03218	3.36384	0.00074	0.00074	0.00074	0.00074	1.66048	2.31733
8345	27758	DATA	8189	50	153	ref|NM_177820|ref|NM_001143686|ref|NM_001177533|ens|ENSMUST00000181154	mm|chr15:77426484-77426425	0	NA	71	GAACCACACAGCTAAGGACAGCTGGGACACATCCAAACGTGGCTGCAGGAAGATTCCTTG	7640	0	A_66_P120380	Apol10b	NM_177820	ref|Mus musculus apolipoprotein L 10B (Apol10b), mRNA [NM_177820]	0.00100507	0	1.52245	0.358424	7.35225	2	0	0	0	0.00100507	0.00100507	0.00100507	1.8108	2.41802	3.19779	0.00100507	0.00100507	0.00100507	1.13254	1.8376	1.59722
8347	27761	DATA	8959	55	103	ref|NM_009791|ens|ENSMUST00000053364|ref|XM_006529108|gb|AF062378	mm|chr1:141390377-141390436	0	NA	9577	GGATACCTGGAGCAGTTTTTACTGTCAGTGTAAACTGTTTAGATATGACTTTGTGTAAAA	8438	0	A_55_P1988228	Aspm	NM_009791	ref|Mus musculus asp (abnormal spindle)-like, microcephaly associated (Drosophila) (Aspm), mRNA [NM_009791]	0.00155839	0	0.583444	1.00786	1	2	0	0	0	0.00155839	0.00155839	0.00155839	4.90114	1.76488	1.46164	0.00155839	2.11422	0.00155839	0.00155839	1.74722	0.00155839
8348	27762	DATA	10877	67	53	ref|NM_029512|ref|NM_181734|ref|NM_001305803|ref|NR_131225	mm|chr2:163441895-163441954	0	NA	1668	AGGCTTCAAAGCATCCCTGGGAGTCCAGGGTTAAATCTTGCAATAGAAACTTTTCCCAAC	10117	0	A_55_P2054437	Ttpal	NM_029512	ref|Mus musculus tocopherol (alpha) transfer protein-like (Ttpal), transcript variant 1, mRNA [NM_029512]	0.00124175	0	2.01957	0.615066	5.68371	2	0	0	0	0.00124175	0.00124175	0.00124175	1.20999	2.05717	2.66667	0.00124175	0.00124175	0.00124175	1.56047	2.71841	1.77985
8350	27765	DATA	14364	88	96	ref|NM_027452|ens|ENSMUST00000046254|gb|BC139418|gb|BC116651	mm|chr17:49236599-49236658	0	NA	2684	TCAGCACTGGCAAGTATTTGTGGAGTTTCCATGGTGATGTTTACATCCAGGGACAGTCTT	13170	0	A_51_P229498	Lrfn2	NM_027452	ref|Mus musculus leucine rich repeat and fibronectin type III domain containing 2 (Lrfn2), mRNA [NM_027452]	0.00311891	0	0.916353	1.58177	1	2	0	0	0	0.00311891	0.00311891	0.00311891	2.66901	2.88759	3.67563	0.00311891	0.00311891	0.00311891	0.00311891	0.00311891	2.74282
8351	27766	DATA	14927	92	3	ref|NM_178387|ens|ENSMUST00000041422|ens|ENSMUST00000178631|ens|ENSMUST00000113548	mm|chr5:74066498-74066557	0	NA	1601	TTTTATCACGTGTGGCCTGCTCTCATGGAGAATGACTGTGTCATTATGAAGGGAGAAGCT	13600	0	A_55_P2103865	Spata18	NM_178387	ref|Mus musculus spermatogenesis associated 18 (Spata18), mRNA [NM_178387]	0.00117803	0	1.71665	0.551417	5.38846	2	0	0	0	0.00117803	0.00117803	0.00117803	1.48432	2.44441	1.79944	0.00117803	1.11599	0.00117803	2.35311	1.41413	1.38271
8352	27767	DATA	15082	92	158	ref|NM_001290469|ens|ENSMUST00000080882|ref|XM_011250520|gb|BC027000	mm|chr7:25763258-25763199	0	NA	3527	CCCGTCTCCTGGCGTATGCCATCTCCGGTTCTAATTCTGAACAATTATCAAATATATCAG	13874	0	A_52_P653654	Atp1a3	NM_001290469	ref|Mus musculus ATPase, Na+/K+ transporting, alpha 3 polypeptide (Atp1a3), mRNA [NM_001290469]	0.00210406	0	0.968103	1.67316	1	2	0	0	0	0.00210406	0.00210406	0.00210406	2.10389	2.54942	2.78438	0.00210406	0.00210406	1.64748	0.00210406	2.9001	0.00210406
8357	27773	DATA	19021	116	161	ref|NM_010644|ref|NM_010115|ens|ENSMUST00000048945|ref|XM_006540675	mm|chr7:51271516-51271671	0	NA	518	CATTACACCCACAAGATGGCAAAAGTCAGATGATCTTCAGTGTGTGTTCATCACGCTCCT	17431	0	A_52_P543684	Klk1b26	NM_010644	ref|Mus musculus kallikrein 1-related petidase b26 (Klk1b26), mRNA [NM_010644]	0.00148302	1.43e-10	1.78383	1.67994	1.83764	2	0	0	0	0.00148302	0.00148302	0.00148302	1.64616	3.20456	1.7889	0.00148302	0.00148302	0.00148302	0.00148302	2.01197	3.33804
8359	27778	DATA	27781	170	65	gb|BF303045	mm|chr15:62614251-62614310	0	NA	594	TTATACAATAGCAGACCTTGCATGGTTTATGGAAACATATCATCTCACTTATGAAGGGGA	25210	0	A_66_P102424	BF303045	BF303045	gb|602030975F1 NCI_CGAP_SG2 Mus musculus cDNA clone IMAGE:4166011 5'. [BF303045]	0.0012926	0	1.83276	3.1722	1	2	0	0	0	0.0012926	0.0012926	0.0012926	0.943866	2.9859	2.56419	0.0012926	0.0012926	0.0012926	5.4957	0.0012926	0.0012926
8363	27787	DATA	32247	197	103	gb|AK082264|gb|BU703706|tc|TC1592004|tc|TC1611735	mm|chr1:34781058-34781117	0	NA	2588	AGACCAAATCTGGTGTGATTCAAGTAGGGACATCTGGGGACCTCAGCGGTGAAGGACCTT	29365	0	A_66_P117128	C230030N03Rik	AK082264	gb|Mus musculus 0 day neonate cerebellum cDNA, RIKEN full-length enriched library, clone:C230030N03 product:hypothetical protein, full insert sequence. [AK082264]	0.0022428	0	0.752147	1.29887	1	2	0	0	0	0.0022428	0.0022428	0.0022428	2.79228	2.53997	2.03403	0.0022428	2.36606	0.0022428	0.0022428	0.0022428	2.25196
8368	27797	DATA	39943	244	91	ref|NM_001201378|ref|NM_145574|ens|ENSMUST00000181464|ens|ENSMUST00000096084	mm|chr6:29349273-29349332	0	NA	181	AGCAAGTAGAGAAAGGAGGCAGTTTGGGCTCCCTTTCAATGGGCAAGCATCGGGGCCTGA	36070	0	A_55_P2744903	Ccdc136	NM_001201378	ref|Mus musculus coiled-coil domain containing 136 (Ccdc136), transcript variant 2, mRNA [NM_001201378]	0.00190587	0	1.1422	0.995194	1.98458	2	0	0	0	0.00190587	0.00190587	0.00190587	1.69845	2.6841	1.89777	0.00190587	2.28355	0.00190587	0.00190587	1.58902	1.83567
8372	27803	DATA	41320	252	156	ref|NM_010207|ens|ENSMUST00000129103|ens|ENSMUST00000122054|ens|ENSMUST00000153166	mm|chr7:137386025-137385966	0	NA	1466	CAACAATAGGACAGTGCTTATTGGGGAGTATCTCCAGATAAAAGGTGCCACACCTAGAGA	37365	0	A_52_P158800	Fgfr2	NM_010207	ref|Mus musculus fibroblast growth factor receptor 2 (Fgfr2), transcript variant 1, mRNA [NM_010207]	0.00160234	0	1.16301	1.00583	1.99997	2	0	0	0	0.00160234	0.00160234	0.00160234	3.36358	2.35678	1.62785	0.00160234	0.00160234	1.15475	1.73801	0.00160234	1.74942
8373	27804	DATA	41748	255	92	ref|NM_001081412|ens|ENSMUST00000164107|ref|XM_006513060|ref|XM_006513061	mm|chr10:74617739-74617798	0	NA	2460	GGTGCCAGATGAGGAACTGGATGCCTTGAAGATCAAAATCTCCCAAATCAAGAGCGACAT	37828	0	A_66_P106028	Bcr	NM_001081412	ref|Mus musculus breakpoint cluster region (Bcr), mRNA [NM_001081412]	0.00098	0	1.58125	0.421835	6.48858	2	0	0	0	0.00098	0.00098	0.00098	2.04715	1.81243	2.19655	0.00098	1.19522	0.00098	2.06388	1.28299	1.39688
8379	27816	DATA	47763	292	39	ref|NM_001256115|ens|ENSMUST00000110884|ref|XM_006504762|ref|XM_006504765	mm|chr5:139706766-139709457	0	NA	975	TTTCCAGAGTGGACGGGGAGTCCCTGTGTGACCTCTTGGTTCAAGCACTGCGAAGGACTA	43010	0	A_55_P2745246	Sun1	NM_001256115	ref|Mus musculus Sad1 and UNC84 domain containing 1 (Sun1), transcript variant 2, mRNA [NM_001256115]	0.00170748	0	2.28901	0.693196	5.71517	2	0	0	0	0.00170748	0.00170748	0.00170748	1.46245	1.96004	1.70022	0.00170748	0.00170748	0.00170748	3.08057	1.99618	1.79029
8381	27821	DATA	50754	310	78	ref|NM_134252|ens|ENSMUST00000113114|ens|ENSMUST00000171176|ens|ENSMUST00000040210	mm|chr1:90285366-90285425	0	NA	3783	TAAGTGTTGACACTCCTTTCCCACGACTGTGACTCTGGCCCTGATTTTATACTTATACTG	45732	0	A_55_P2038013	Trpm8	NM_134252	ref|Mus musculus transient receptor potential cation channel, subfamily M, member 8 (Trpm8), mRNA [NM_134252]	0.00102895	0	1.7615	0.366029	8.33054	2	0	0	0	0.00102895	0.00102895	0.00102895	1.64974	2.05489	1.01728	0.00102895	1.98844	0.00102895	1.8684	1.35392	2.06218
8383	27826	DATA	52895	323	87	ref|NM_183046|ens|ENSMUST00000087341|ref|XM_011247247|ref|XM_006527082	mm|chr19:35017012-35022112	0	NA	2315	GCACTCAAGACATCAAGTAAGGTTGATACATCTTTAACCAGCAATAAGCCAACTTGTAAT	47785	0	A_51_P205242	Kif20b	NM_183046	ref|Mus musculus kinesin family member 20B (Kif20b), mRNA [NM_183046]	0.000983	0	1.83575	1.24118	2.56041	2	0	0	0	0.000983	0.000983	0.000983	2.7452	1.27105	1.10717	0.000983	1.36441	0.000983	3.22348	0.831749	1.45204
8385	27831	DATA	59089	361	49	ref|NM_146904|ens|ENSMUST00000086476|gb|BC148325|gb|BC152976	mm|chr9:19975416-19975357	0	NA	597	TATATTGTGATATGGGTCCTTGGCTTCATCCCTTTCTCAGGGATCCTTTATTCATACTAT	53335	0	A_51_P201751	Olfr870	NM_146904	ref|Mus musculus olfactory receptor 870 (Olfr870), mRNA [NM_146904]	0.00147045	0	1.6139	1.40767	1.984	2	0	0	0	0.00147045	0.00147045	0.00147045	2.58738	1.07049	1.69053	0.00147045	1.80253	0.00147045	2.5978	0.00147045	2.24244
8387	27833	DATA	62042	379	50	gb|AK142114|gb|BB471708|riken|D230040F06	mm|chr16:52417305-52417246	0	NA	5019	CCAGAGGCAAAAAAGGAAATGAATAAAAAGTGCCAGATTTTCTTAAGCCTTAAAGTAGGT	55958	0	A_55_P2193064	6720473M08Rik	AK142114	gb|Mus musculus 12 days embryo eyeball cDNA, RIKEN full-length enriched library, clone:D230040F06 product:hypothetical protein, full insert sequence. [AK142114]	0.00113561	0	1.55774	1.4053	1.91854	2	0	0	0	0.00113561	0.00113561	0.00113561	2.69708	2.1993	2.42358	0.00113561	0.00113561	0.00113561	2.73304	1.93906	0.00113561
8388	27835	DATA	62360	381	40	ref|NM_147099|ens|ENSMUST00000106886|gb|BC106821|gb|BC106822	mm|chr7:110712909-110712850	0	NA	882	AGCTTAAAAACCAAACAGATAAGGTCTGCAGTGTGCAAAATATTTAAAGTTTGGGGAAAC	56238	0	A_55_P2072168	Olfr616	NM_147099	ref|Mus musculus olfactory receptor 616 (Olfr616), mRNA [NM_147099]	0.00104564	0	1.74033	1.64516	1.83115	2	0	0	0	0.00104564	0.00104564	0.00104564	1.57849	3.03586	2.15839	0.00104564	0.00104564	0.00104564	3.27156	0.00104564	1.94839
8389	27836	DATA	62698	383	50	ref|XM_006499408|ref|XM_011239510|ref|XM_006499391|gb|AK080667	mm|chr2:165704446-165704387	0	NA	441	TTAGAAGCCCAGATTTCTTGCTCAGGGAAGGAGTTATGTGGGAGTCTTCTTTTTGGGCAA	56545	0	A_55_P2933224	Zmynd8	XM_006499408	ref|PREDICTED: Mus musculus zinc finger, MYND-type containing 8 (Zmynd8), transcript variant X27, mRNA [XM_006499408]	0.000373	3.56e-11	0.498627	0.109415	7.88744	2	0	0	0	0.000373	0.000373	0.000373	0.459228	6.1417	3.90095	0.000373	0.000373	0.000373	0.373325	0.575279	0.547277
8391	27839	DATA	62848	384	36	gb|AI662168	mm|chr9:63903861-63903802	0	NA	358	AGGAAGGGAGGGTGCTTTAGCCTCAGCCTTCTGAGGATGCCTCTGTCAGAGCTGGAAACT	56523	0	A_55_P2233818	AI662168	AI662168	gb|mz93c04.x1 Soares mouse lymph node NbMLN Mus musculus cDNA clone IMAGE:720966 3'. [AI662168]	0.00119088	0	1.7324	1.13514	2.64155	2	0	0	0	0.00119088	0.00119088	0.00119088	2.10389	1.39005	1.25161	0.00119088	2.05129	0.00119088	1.26382	3.02682	0.906557
8484	28649	DATA	39504	241	144	ens|ENSMUST00000159563|ref|XM_006497238|gb|AB022600|tc|TC1721915	mm|chr1:196903903-196902794	0	NA	833	GGTGATCTGTAGTGCTAATAACTCTTGGGAGCCATCTATCCCAAAATGTCTTAAAGTTAC	35866	0	A_55_P2058230	Cd46	ENSMUST00000159563	ens|CD46 antigen, complement regulatory protein [Source:MGI Symbol;Acc:MGI:1203290] [ENSMUST00000159563]	0.405638	0.700455	1.38505	0.216796	2.31357	2	0	0	0	0.00123003	1.21445	0.00123003	2.84548	0.00123003	1.18063	0.00123003	1.68515	0.914222	1.29799	1.63184	1.22532
8509	28689	DATA	25744	157	160	ref|NM_001033333|ens|ENSMUST00000048229|gb|BC150915|gb|BC150923	mm|chr10:116214499-116214440	0	NA	2669	ACTGATAGTCTTCCAGTGCAAATACACGCTAGGGAATATATGTTTCCGCAGTCAACGGGA	23615	0	A_66_P102072	Myrfl	NM_001033333	ref|Mus musculus myelin regulatory factor-like (Myrfl), mRNA [NM_001033333]	0.0011112	0	1.34578	0.171376	13.5902	2	0	0	0	0.0011112	0.0011112	0.0011112	2.42333	3.35072	0.0011112	0.0011112	1.36677	0.816267	1.31181	1.19393	1.5316
8543	28878	DATA	11614	71	134	ens|ENSMUST00000174015|gb|AK164876|gb|AK015297|tc|TC1628570	mm|chr17:22147197-22147256	0	NA	560	TGTCCTTCTCATAGTATTCAAGTTTCTGATAACAAAGCAAAAAATCAAGATTGAAGGGGG	10872	0	A_52_P456296	Zfp943	ENSMUST00000174015	ens|zinc finger prtoein 943 [Source:MGI Symbol;Acc:MGI:1921920] [ENSMUST00000174015]	0.798048	0.731779	1.54961	0.111159	1.7587	2	0	0	0	0.000979	1.4395	0.953661	0.000979	1.10128	3.09555	0.000979	0.000979	0.757269	1.67684	1.47131	1.50067
8547	28929	DATA	29845	182	161	ref|NM_001163455|ens|ENSMUST00000169172|ref|XM_006501552|ref|XR_375528	mm|chr3:132504085-132504144	0	NA	6010	CAGGGAAATGTTTTAACAGATAAATTTTAAGTAATATTTAATATTCTCAACTACAACATT	27141	0	A_52_P333487	Tbck	NM_001163455	ref|Mus musculus TBC1 domain containing kinase (Tbck), mRNA [NM_001163455]	0.802109	0.695419	1.62104	0.341941	1.83038	2	0	0	0	1.15308	1.2521	0.00114705	1.36719	0.00114705	1.64602	0.00114705	1.71389	0.00114705	1.96529	1.28145	1.61639
8550	28962	DATA	42833	262	29	ref|NM_007864|ref|NM_001109752|ens|ENSMUST00000108588|ens|ENSMUST00000108589	mm|chr11:69858757-69858816	0	NA	3049	ACCTCCCACCTTTTTTCTTTGCCGGTTTGCATGAGTGGAAGGTCTAACTGTGGCTTTTTT	38588	0	A_55_P2008053	Dlg4	NM_007864	ref|Mus musculus discs, large homolog 4 (Drosophila) (Dlg4), transcript variant 1, mRNA [NM_007864]	0.731294	0.699415	1.65644	0.179408	2.21921	2	0	0	0	1.39476	0.798355	0.000765	1.66823	0.000765	2.00545	0.000765	1.16082	0.000765	1.60608	1.50759	1.85565
8554	28984	DATA	51685	316	25	ens|ENSMUST00000148425|tc|TC1775218	mm|chr6:54767463-54813924	0	NA	199	GGAGTCCTTCTGGAACCAGTAGTCTAATGGATTTAAGTGCCCGGTATGCTCAAAATTTGT	46512	0	A_55_P2612769	Znrf2	ENSMUST00000148425	ens|zinc and ring finger 2 [Source:MGI Symbol;Acc:MGI:1196246] [ENSMUST00000148425]	0.614589	0.550353	1.64923	0.340716	2.76858	3	0	0	0	0.778776	1.06416	0.000828	1.76349	0.000828	2.50523	0.000828	0.937332	0.000828	1.31796	1.99867	1.63107
8561	29022	DATA	7114	44	62	ref|NM_010031|gb|M33225|tc|TC1581778	unmapped	0	NA	366	GGCCACTGATGCTGGTGCCTGATGACCACTTCTCAATAAATTGTTCGCAATATGAAAAAA	6592	0	A_55_P1999108	Defa1	NM_010031	ref|Mus musculus defensin, alpha 1 (Defa1), mRNA [NM_010031]	0.463576	0.800685	1.84365	0.161576	2.92641	2	0	0	0	1.38813	0.00129974	0.00129974	1.10099	1.76332	0.00129974	0.00129974	2.21011	0.00129974	1.65717	1.94203	1.93175
8562	29027	DATA	8842	54	150	ens|ENSMUST00000133875|gb|AK036939|tc|TC1627783|riken|9930028D11	mm|chrX:103317692-103317751	0	NA	4125	GGGCACATAAATGCCTACAAAGCAATGTCCAGTAAGATTAAATCATGCAGTAAAAGATTT	8228	0	A_55_P2715973	Atp7a	ENSMUST00000133875	ens|ATPase, Cu++ transporting, alpha polypeptide [Source:MGI Symbol;Acc:MGI:99400] [ENSMUST00000133875]	0.47379	0.818208	1.76372	0.136335	2.69349	2	0	0	0	0.00139773	1.41858	0.00139773	1.87062	0.00139773	1.57465	0.00139773	1.83801	0.00139773	1.65007	1.72619	1.91488
8573	29084	DATA	42894	262	90	ref|NM_028761|ens|ENSMUST00000058884|ref|XM_006522652|ref|XM_011246023	mm|chr16:13603188-13603129	0	NA	1532	TCAGATATCCTGGATTGATGATACATCAGCCTTCGTTTCTCTCAGCCAGCCAGAACAAGT	38700	0	A_66_P134513	Parn	NM_028761	ref|Mus musculus poly(A)-specific ribonuclease (deadenylation nuclease) (Parn), mRNA [NM_028761]	0.38804	0.670114	1.73997	0.358199	3.08171	3	0	0	0	1.16182	0.00114966	0.00114966	1.79825	2.44206	0.00114966	0.00114966	1.37221	0.00114966	1.69095	1.40881	2.12015
[truncated: 1,923 more rows]

## Sheet: SOTA-cluster2
Original row	Original row	FEATURES	FeatureNum	Row	Col	accessions	chr_coord	SubTypeMask	SubTypeName	Start	Sequence	ProbeUID	ControlType	ProbeName	GeneName	SystematicName	Description	GroupA mean	GroupA std.dev.	GroupB mean	GroupB std.dev.	Absolute t value	Degrees of freedom	Raw p value	Adj p value	False Discovery Rate	Diab+Parg-24	Diab+Parg-22	Diab+Parg-19	Ctrl+Parg-10	Ctrl+Parg-8	Ctrl+Parg-6	Diab-18	Diab-12	Diab-11	Ctrl-5	Ctrl-4	Ctrl-2
[truncated: 365 more rows]

[truncated: 9 more sheets: SOTA-cluster3, SOTA-cluster4, SOTA-cluster5, SOTA-cluster6, SOTA-cluster7, SOTA-cluster8, SOTA-cluster9, SOTA-cluster10, SOTA-cluster11]
