# Supplementary material for: Monoamine Oxidase-Dependent Pro-Survival Signaling in Diabetic Hearts Is Mediated by miRNAs
Source: Cells. 2022 Aug 30;11(17):2697. doi: 10.3390/cells11172697 (PMC9454570; doi:10.3390/cells11172697)
Supplement: Supplementary file 1 [file cells-11-02697-s001.zip › 4.Pathways altered-Supplementary Table S4.xlsx]

## Sheet: SOTA-cluster5
pathway_o	pathway	pval	padj	overlap	size	overlapGenes
KEGG_Cellular_senescence%mmu04218	KEGG_Cellular_senescence%mmu04218	9.71997e-13	2.69243e-10	21	183	PIK3R2;H2-Q7;H2-Q8;H2-T23;H2-D1;H2-K1;H2-L;GM11127;RHEB;HIPK2;RAF1;ETS1;ATR;SQSTM1;CAPN1;CAPN2;PPP3CB;ITPR1;ITPR2;ITPR3;MCU
WP_EGFR1_Signaling_Pathway%WP572	WP_EGFR1_Signaling_Pathway%WP572	4.97954e-12	6.92155e-10	20	178	STAT5B;CAV2;ATF1;PIK3R2;MAPK8;CBLB;TNK2;ASAP1;PLCG1;CTNND1;ITCH;CREB1;PITPNA;SOS1;MAP3K4;MAP3K3;EPS15L1;RPS6KA2;APPL2;RAF1
KEGG_Phosphatidylinositol_signaling_system%mmu04070	KEGG_Phosphatidylinositol_signaling_system%mmu04070	1.65478e-11	2.29187e-09	15	95	PI4KA;INPP5B;SYNJ1;PIK3R2;PLCG1;IPMK;IP6K1;PPIP5K2;IMPA1;DGKA;DGKD;ITPR1;ITPR2;ITPR3;PRKCG
KEGG_Autophagy%mmu04140	KEGG_Autophagy%mmu04140	5.30172e-09	4.89526e-07	15	142	PIK3R2;RAF1;HIF1A;RHEB;MLST8;RPS6KB2;SUPT20;SMCR8;SQSTM1;MAPK8;TRAF6;STX17;ITPR1;EIF2AK4;ATG16L1
KEGG_Protein_processing_in_endoplasmic_reticulum%mmu04141	KEGG_Protein_processing_in_endoplasmic_reticulum%mmu04141	7.45479e-09	5.16244e-07	16	168	SEC61A2;RRBP1;GANAB;PRKCSH;LMAN2;SEC24A;UGGT2;UBXN1;DNAJB12;DNAJC5B;BAG2;EIF2AK4;MAP3K5;MAPK8;CAPN1;CAPN2
WP_Alzheimers_Disease%WP2075	WP_Alzheimers_Disease%WP2075	1.8597e-08	1.14861e-06	11	75	LPL;GRIN1;ITPR2;APP;ITPR1;ITPR3;MME;CAPN1;CAPN2;PPP3CB;ATP2A2
WP_Insulin_Signaling%WP65	WP_Insulin_Signaling%WP65	2.47902e-08	1.14861e-06	15	159	RHEB;EHD2;PIK3R2;MAPK8;CBLB;PFKL;RPS6KB2;MAP3K5;SOS1;MAP3K4;MAP3K3;RPS6KA2;MINK1;MAP4K5;RAF1
KEGG_Leukocyte_transendothelial_migration%mmu04670	KEGG_Leukocyte_transendothelial_migration%mmu04670	2.99504e-08	1.25434e-06	13	117	ITGAM;MSN;PIK3R2;CYBA;CTNND1;CTNNA3;CTNNA1;PLCG1;PRKCG;ROCK2;VCL;CXCL12;RAPGEF3
KEGG_Spinocerebellar_ataxia%mmu05017	KEGG_Spinocerebellar_ataxia%mmu05017	3.77103e-08	1.25434e-06	14	141	TRPC3;PRKCG;ITPR1;ITPR2;ITPR3;GRIN1;MCU;PSMC5;MAP3K5;MAPK8;ATP2A2;TBPL1;NFYA;PIK3R2
KEGG_GnRH_secretion%mmu04929	KEGG_GnRH_secretion%mmu04929	3.78229e-08	1.25434e-06	10	63	PRKCG;ITPR1;ITPR2;ITPR3;CACNA1G;TRPC1;GABBR1;RAF1;PIK3R2;ESR2
KEGG_Thyroid_hormone_signaling_pathway%mmu04919	KEGG_Thyroid_hormone_signaling_pathway%mmu04919	4.06462e-08	1.25434e-06	13	120	RAF1;NCOR1;RXRA;MED12;MED13L;HIF1A;ATP2A2;PLCG1;PRKCG;ATP1B2;PIK3R2;RHEB;PFKL
KEGG_Tight_junction%mmu04530	KEGG_Tight_junction%mmu04530	4.07547e-08	1.25434e-06	15	165	MPDZ;ARHGAP17;DLG1;MAPK8;CFTR;MSN;MAP3K5;ACTR2;WHAMM;ARHGEF18;ROCK2;PRKAG3;MYL6B;MAGI1;RAPGEF2
WP_IL-3_Signaling_Pathway%WP373	WP_IL-3_Signaling_Pathway%WP373	3.80614e-08	1.32263e-06	12	99	STAT5B;ATF1;PIK3R2;RXRA;MAPK8;VCL;SYK;RPS6KB2;CREB1;SOS1;SOCS2;RAF1
KEGG_Sphingolipid_signaling_pathway%mmu04071	KEGG_Sphingolipid_signaling_pathway%mmu04071	6.02254e-08	1.66824e-06	13	124	SGMS1;NSMAF;ASAH2;ACER2;MAP3K5;MAPK8;PPP2R3A;PPP2R5A;PIK3R2;ABCC1;RAF1;PRKCG;ROCK2
KEGG_AMPK_signaling_pathway%mmu04152	KEGG_AMPK_signaling_pathway%mmu04152	7.28942e-08	1.83561e-06	13	126	CAB39;STRADB;PRKAG3;PFKL;CREB1;EEF2K;PPP2R3A;PPP2R5A;TBC1D1;CFTR;PIK3R2;RHEB;RPS6KB2
KEGG_Focal_adhesion%mmu04510	KEGG_Focal_adhesion%mmu04510	8.73637e-08	2.01665e-06	16	200	COL4A5;LAMA2;FN1;TNXB;KDR;ROCK2;PPP1R12C;MYLK2;CAPN2;VCL;PRKCG;PIK3R2;MAPK8;CAV2;SOS1;RAF1
KEGG_Phagosome%mmu04145	KEGG_Phagosome%mmu04145	1.2889e-07	2.55018e-06	15	180	STX12;SEC22B;H2-Q7;H2-Q8;H2-T23;H2-D1;H2-K1;H2-L;GM11127;ATP6V0E;ATP6V0A1;M6PR;SEC61A2;ITGAM;CYBA
KEGG_Axon_guidance%mmu04360	KEGG_Axon_guidance%mmu04360	1.2889e-07	2.55018e-06	15	180	PLCG1;TRPC1;TRPC3;PPP3CB;ABLIM2;ROCK2;UNC5B;EPHB4;RGS3;CXCL12;NRP1;SEMA6A;RAF1;PTCH1;PIK3R2
KEGG_Spliceosome%mmu03040	KEGG_Spliceosome%mmu03040	1.38308e-07	2.55409e-06	13	133	CDC40;PRPF40A;RBM25;FUS;SF3B1;DDX42;PUF60;PRPF3;PRPF31;SNRNP200;AQR;SRSF2;SRSF6
KEGG_Apoptosis%mmu04210	KEGG_Apoptosis%mmu04210	1.64846e-07	2.8539e-06	13	135	HTRA2;PARP4;ITPR1;ITPR2;ITPR3;CAPN1;CAPN2;CTSH;DAB2IP;MAP3K5;MAPK8;PIK3R2;RAF1

## Sheet: SOTA-cluster8
pathway_o	pathway	pval	padj	overlap	size	overlapGenes
KEGG_Protein_processing_in_endoplasmic_reticulum%mmu04141	KEGG_Protein_processing_in_endoplasmic_reticulum%mmu04141	9.27786e-18	2.56997e-15	31	168	SEC61B;SEC62;RPN2;TUSC3;STT3B;CKAP4;SIL1;HYOU1;CALR;MAN1C1;LMAN1L;SEC31A;SEC23A;SEC24D;EDEM3;P4HB;ERP29;UBXN2A;SVIP;DNAJB2;HSPA4L;BAG2;PLAA;UBQLN4;NGLY1;BCL2;UBE2J1;SEL1L;UBE2D2A;RBX1;FBXO2
KEGG_Phagosome%mmu04145	KEGG_Phagosome%mmu04145	2.26424e-13	3.13597e-11	27	180	STX7;ACTG1;SEC22B;H2-M11;H2-AB1;RAB5B;PIK3C3;ATP6V1A;ATP6V1C1;ATP6V1D;ATP6V1G2;ATP6AP1;RAB7;TUBA4A;TUBA1C;TUBA1B;TUBB4B;TUBB3;TUBB6;M6PR;NOS1;SEC61B;CALR;ITGAV;THBS4;MRC2;MSR1
KEGG_Hepatocellular_carcinoma%mmu05225	KEGG_Hepatocellular_carcinoma%mmu05225	1.60264e-10	1.47977e-08	23	173	PRKCA;MAP2K1;MTOR;RPS6KB1;MYC;TERT;WNT5B;WNT9A;FZD1;FZD9;LRP5;PEG12;CSNK1A1;TCF7;GSTM5;GSTM6;GSTM4;TXNRD2;MET;ACTG1;DPF3;SMARCA4;BRD7
WP_Purine_metabolism%WP2185	WP_Purine_metabolism%WP2185	1.26448e-10	1.75762e-08	23	171	PDE6H;POLR3B;NME6;POLR3C;RRM2B;PDE1C;POLR2I;TAF9;PPAT;PDE7B;POLR3D;APRT;POLR2D;PDE4D;PDE6G;POLR2A;POLR3K;GUCY2D;NT5C;NUDT5;POLA1;GUK1;ADK
KEGG_RNA_polymerase%mmu03020	KEGG_RNA_polymerase%mmu03020	2.40474e-09	1.66528e-07	10	30	POLR2A;POLR2D;POLR2I;POLR2M;POLR3B;POLR3C;POLR3D;CRCP;POLR3K;POLR2K
KEGG_Cell_cycle%mmu04110	KEGG_Cell_cycle%mmu04110	3.6746e-09	2.03573e-07	18	124	RBL2;TFDP2;MYC;CDKN2C;RBX1;CDC45;DBF4;YWHAB;YWHAQ;YWHAG;CDC23;ANAPC15;STAG2;STAG1;CDC14B;ATR;CDC25A;MCM2
KEGG_Ubiquitin_mediated_proteolysis%mmu04120	KEGG_Ubiquitin_mediated_proteolysis%mmu04120	7.78231e-09	3.59283e-07	19	145	RPS27A;UBA3;UBE2D2A;UBE2E3;UBE2E1;UBE2F;UBE2J1;UBE2QL1;UBE3A;WWP2;TRIP12;XIAP;PIAS2;NHLRC1;RBX1;FBXO2;RNF7;CDC23;ANAPC15
KEGG_Tight_junction%mmu04530	KEGG_Tight_junction%mmu04530	1.2322e-08	4.87598e-07	20	165	CLDN3;CLDN18;PARD6G;LLGL2;PPP2CA;TJAP1;GATA4;ACTG1;RAB13;ARHGEF18;PRKAA1;PRKAB1;MYH9;MYL6;MYL6B;SYNPO;MARVELD2;TUBA4A;TUBA1C;TUBA1B
KEGG_Thyroid_hormone_signaling_pathway%mmu04919	KEGG_Thyroid_hormone_signaling_pathway%mmu04919	1.4409e-08	4.98911e-07	17	120	ITGAV;MAP2K1;SIN3A;NCOA2;MED4;MED16;MED27;GATA4;MYC;PLCB2;PLCD3;PLCE1;PRKCA;FXYD2;MTOR;DIO2;ACTG1
WP_Calcium_Regulation_in_the_Cardiac_Cell%WP553	WP_Calcium_Regulation_in_the_Cardiac_Cell%WP553	9.78538e-09	6.80084e-07	19	147	YWHAQ;GJB1;CALR;YWHAB;CACNA1B;PRKCA;GNAS;YWHAG;CHRM1;GJA1;RGS9;GNB1;PRKAR1A;PRKAR2A;GJC2;RYR1;CAMK1;FXYD2;RGS11
KEGG_Hippo_signaling_pathway%mmu04390	KEGG_Hippo_signaling_pathway%mmu04390	2.61441e-08	8.0406e-07	19	156	PARD6G;PPP2CA;PPP1CC;LLGL2;TRP73;TEAD2;BIRC5;SERPINE1;ID2;WNT5B;WNT9A;FZD1;FZD9;YWHAB;YWHAQ;YWHAG;TCF7;MYC;ACTG1
KEGG_mTOR_signaling_pathway%mmu04150	KEGG_mTOR_signaling_pathway%mmu04150	2.90274e-08	8.0406e-07	19	157	ATP6V1A;ATP6V1C1;ATP6V1D;ATP6V1G2;LAMTOR1;MTOR;DEPTOR;LPIN2;RPS6KB1;CAB39;PRKAA1;WNT5B;WNT9A;FZD1;FZD9;LRP5;MAP2K1;MAPKAP1;PRKCA
WP_MicroRNAs_in_Cardiomyocyte_Hypertrophy%WP1560	WP_MicroRNAs_in_Cardiomyocyte_Hypertrophy%WP1560	2.37004e-08	1.09812e-06	14	82	IKBKG;IL6ST;NFATC4;MAP2K1;FGFR2;GATA4;NRG1;EDN1;PLCB2;MTOR;LRP5;FZD1;PRKG1;HDAC9
KEGG_Gastric_cancer%mmu05226	KEGG_Gastric_cancer%mmu05226	7.59095e-08	1.91154e-06	18	150	WNT5B;WNT9A;FZD1;FZD9;LRP5;PEG12;CSNK1A1;TCF7;MYC;TERT;MAP2K1;MTOR;RPS6KB1;BCL2;MET;FGF16;FGF18;FGFR2
KEGG_Oxytocin_signaling_pathway%mmu04921	KEGG_Oxytocin_signaling_pathway%mmu04921	1.03005e-07	2.37771e-06	18	153	MAP2K1;PLA2G4A;RYR1;KCNJ2;KCNJ4;PLCB2;PRKCA;EEF2K;CACNA2D1;NFATC4;PRKAA1;PRKAB1;CAMK1;MYL6;MYL6B;ACTG1;PPP1CC;GNAS
KEGG_Vasopressin-regulated_water_reabsorption%mmu04962	KEGG_Vasopressin-regulated_water_reabsorption%mmu04962	1.13064e-07	2.40913e-06	10	43	GNAS;ARHGDIB;CREB3L1;CREB3L2;AQP2;RAB11B;DCTN1;DCTN4;RAB5B;AQP4
WP_Regulation_of_Actin_Cytoskeleton%WP523	WP_Regulation_of_Actin_Cytoskeleton%WP523	8.41139e-08	2.92296e-06	18	151	FGF18;MAP2K1;ACTG1;FGFR2;FGF16;SSH1;PIK3C2A;GNA13;PIK3C2B;FGF12;WASF1;CHRM1;FGF14;PIK3C3;CFL1;CFL2;NCKAP1;CYFIP2
KEGG_AMPK_signaling_pathway%mmu04152	KEGG_AMPK_signaling_pathway%mmu04152	1.80239e-07	3.56616e-06	16	126	CAB39;PRKAA1;PRKAB1;CREB3L1;CREB3L2;EEF2K;ACACA;MLYCD;PPP2CA;PPP2R3A;PPP2R5C;PPP2R5E;RAB11B;IRS4;MTOR;RPS6KB1
KEGG_Ribosome%mmu03010	KEGG_Ribosome%mmu03010	2.37169e-07	4.37972e-06	19	179	MRPS14;MRPS17;MRPS18C;RPS3A1;RPS18;RPS25;RPS27;RPS27A;MRPL9;MRPL34;RPL6;RPL9;RPL31;RPL39;RPL41;RPL36A;RPL36AL;RPLP1;RPLP2
KEGG_Melanogenesis%mmu04916	KEGG_Melanogenesis%mmu04916	3.09212e-07	4.77541e-06	14	100	A;GNAS;CREB3L1;CREB3L2;WNT5B;WNT9A;FZD1;FZD9;TCF7;MAP2K1;DCT;EDN1;PLCB2;PRKCA
KEGG_Inositol_phosphate_metabolism%mmu00562	KEGG_Inositol_phosphate_metabolism%mmu00562	3.10217e-07	4.77541e-06	12	72	PIK3C3;MTM1;MTMR2;SYNJ2;PIK3C2A;PIK3C2B;FIG4;PLCB2;PLCD3;PLCE1;MIOX;TPI1
KEGG_Wnt_signaling_pathway%mmu04310	KEGG_Wnt_signaling_pathway%mmu04310	3.24108e-07	4.77541e-06	18	165	WNT5B;WNT9A;RSPO1;LGR4;FZD1;FZD9;LRP5;PEG12;CSNK2A1;CSNK1A1;TCF7;MYC;RBX1;GPC4;PRICKLE2;PLCB2;PRKCA;NFATC4
KEGG_Peroxisome%mmu04146	KEGG_Peroxisome%mmu04146	3.27555e-07	4.77541e-06	13	86	PEX3;PEX1;MPV17;PXMP4;PEX11G;HACL1;EHHADH;ACAA1A;NUDT7;CRAT;MLYCD;CAT;DHRS4

## Sheet: SOTA-cluster10
pathway_o	pathway	pval	padj	overlap	size	overlapGenes
KEGG_Ubiquitin_mediated_proteolysis%mmu04120	KEGG_Ubiquitin_mediated_proteolysis%mmu04120	6.29071e-11	1.74253e-08	19	145	UBA1;UBA2;UBE2D3;UBE2I;UBE2J2;UBE2L3;UBE2K;UBE3B;UBE3C;CBLB;SIAH1B;PIAS1;MID1;BTRC;KLHL9;DET1;ANAPC11;CDC23;CDC26
WP_TNF-alpha_NF-kB_Signaling_Pathway%WP246	WP_TNF-alpha_NF-kB_Signaling_Pathway%WP246	7.21973e-10	1.00354e-07	20	186	UBE2I;CHUK;SKP1A;TAB2;YWHAH;CCAR2;POLR1C;IKBKG;HDAC2;POLR1D;RPS11;BTRC;RPL30;DDX3X;CFLAR;CASP8AP2;KCNQ1;CRADD;GTF2I;TRPC4AP
WP_Cytoplasmic_Ribosomal_Proteins%WP163	WP_Cytoplasmic_Ribosomal_Proteins%WP163	4.9256e-09	3.42329e-07	14	96	RPL37A;RPS20;RPS28;GM5621;RPL37;RPS14;RPS11;RPL28;RPS3A1;RPL30;RPL23A;RPS7;RPS27;RPL37RT
WP_Purine_metabolism%WP2185	WP_Purine_metabolism%WP2185	4.31473e-08	1.99916e-06	17	171	GUCY1B2;POLE3;PRIM1;AK2;AK4;ENTPD5;NT5E;POLR1C;PDE1C;POLR1D;NT5C3;NME5;GMPS;PNP;PDE5A;POLR3F;PRPS1
KEGG_Fluid_shear_stress_and_atherosclerosis%mmu05418	KEGG_Fluid_shear_stress_and_atherosclerosis%mmu05418	2.98307e-08	4.13155e-06	16	147	CALM2;GSTA4;GSTM1;GSTM5;MGST3;MGST2;TXN1;ARHGEF2;IKBKG;CHUK;MAPK8;MAP2K6;CTSL;ACVR2B;NCF1;SUMO2
KEGG_Hepatocellular_carcinoma%mmu05225	KEGG_Hepatocellular_carcinoma%mmu05225	5.12231e-08	4.7296e-06	17	173	PRKCA;PTEN;E2F3;BAX;POLK;WNT5A;WNT11;AXIN1;GSTA4;GSTM1;GSTM5;MGST3;MGST2;PHF10;ARID1B;SMARCA2;PBRM1
KEGG_Ribosome%mmu03010	KEGG_Ribosome%mmu03010	8.44482e-08	5.84804e-06	17	179	MRPS18C;RPS3A1;RPS7;RPS11;RPS14;RPS20;RPS27;RPS28;MRPL1;MRPL18;RPL23A;RSL24D1;RPL28;RPL30;RPL37;RPL37RT;RPL37A
KEGG_Hepatitis_B%mmu05161	KEGG_Hepatitis_B%mmu05161	1.27473e-07	7.01062e-06	16	163	MAPK8;CHUK;IKBKG;FAS;BAX;CCNE1;E2F3;PRKCA;ATF2;PCNA;TAB2;MAP2K3;MAP2K6;DDX3X;IFNA2;IFNA15
KEGG_Pyrimidine_metabolism%mmu00240	KEGG_Pyrimidine_metabolism%mmu00240	1.51855e-07	7.01062e-06	10	58	UMPS;ENTPD5;CTPS;CTPS2;NT5E;UPB1;NT5C3;HDDC2;DTYMK;PNP
WP_Oxidative_Stress_and_Redox_Pathway%WP4466	WP_Oxidative_Stress_and_Redox_Pathway%WP4466	2.43835e-07	8.47325e-06	12	93	SOD2;GSTK1;NCF1;GSTA4;TXN1;LAP3;NRF1;GSTM1;GSTM5;PRDX1;MGST3;MGST2
WP_Amino_Acid_metabolism%WP662	WP_Amino_Acid_metabolism%WP662	3.46817e-07	9.64152e-06	12	96	PCK1;PDHX;LARS2;MDH1;GSTA4;SDHA;PPM1L;ACADM;CTH;SDHD;MPST;GLUL
KEGG_Nucleocytoplasmic_transport%mmu03013	KEGG_Nucleocytoplasmic_transport%mmu03013	3.36647e-07	1.33216e-05	13	114	UBE2I;SUMO2;NUPL1;NUP188;NUP93;NUP50;KPNA1;KPNB1;IPO5;XPO7;MAGOHB;THOC7;THOC3
KEGG_Peroxisome%mmu04146	KEGG_Peroxisome%mmu04146	8.41586e-07	2.91399e-05	11	86	PEX26;PEX7;PEX10;PXMP2;PHYH;ACSL4;AGPS;PMVK;SOD2;PRDX1;GSTK1
KEGG_TNF_signaling_pathway%mmu04668	KEGG_TNF_signaling_pathway%mmu04668	2.03448e-06	6.26166e-05	12	113	TAB2;MAPK8;CFLAR;MAP2K3;MAP2K6;CEBPB;IKBKG;CHUK;ATF2;CSF1;FAS;IL15
KEGG_Cytosolic_DNA-sensing_pathway%mmu04623	KEGG_Cytosolic_DNA-sensing_pathway%mmu04623	2.85798e-06	7.91662e-05	9	62	POLR1C;POLR1D;POLR3F;POLR2K;IFNA2;IFNA15;IKBKG;CHUK;IL33
KEGG_Spinocerebellar_ataxia%mmu05017	KEGG_Spinocerebellar_ataxia%mmu05017	3.81089e-06	9.31207e-05	13	141	PRKCA;AFG3L2;OMA1;PSMA2;PSMB4;MAPK8;ATP2A3;ATP2A2;CIC;RBPJL;PIK3R4;KCNC3;KCND3
KEGG_DNA_replication%mmu03030	KEGG_DNA_replication%mmu03030	4.03411e-06	9.31207e-05	7	35	RPA1;PCNA;DNA2;PRIM1;POLE3;RFC5;RFC3
WP_Exercise-induced_Circadian_Regulation%WP544	WP_Exercise-induced_Circadian_Regulation%WP544	4.11965e-06	9.54386e-05	8	49	RBPMS;TUBB4A;CLOCK;CEBPB;QK;TAB2;NR1D1;PPP2CB
WP_Glycolysis_and_Gluconeogenesis%WP157	WP_Glycolysis_and_Gluconeogenesis%WP157	5.62239e-06	0.000104877	8	51	PGK1;PCK1;PDHX;LDHB;MDH1;MPC2;SLC2A3;MPC1
WP_Calcium_Regulation_in_the_Cardiac_Cell%WP553	WP_Calcium_Regulation_in_the_Cardiac_Cell%WP553	6.03609e-06	0.000104877	13	147	GNB5;ATP2A3;RGS18;PRKCA;YWHAH;GJA1;PKIB;ADRA1A;ADRB1;GNG12;RGS19;PRKAR1A;ATP2A2
