# Supplementary material for: Monoamine Oxidase-Dependent Pro-Survival Signaling in Diabetic Hearts Is Mediated by miRNAs
Source: Cells. 2022 Aug 30;11(17):2697. doi: 10.3390/cells11172697 (PMC9454570; doi:10.3390/cells11172697)
Supplement: Supplementary file 1 [file cells-11-02697-s001.zip › 5.DE-Genes-Supplementary Table S5.xlsx]

## Sheet: DvsC+P
Original row	FEATURES	FeatureNum	Row	Col	accessions	chr_coord	SubTypeMask	SubTypeName	Start	Sequence	ProbeUID	ControlType	ProbeName	GeneName	SystematicName	Description	GroupA mean	GroupA std.dev.	GroupB mean	GroupB std.dev.	Absolute t value	Degrees of freedom	Raw p value	Adj p value	False Discovery Rate	Diab+Parg-24	Diab+Parg-22	Diab+Parg-19	Ctrl+Parg-10	Ctrl+Parg-8	Ctrl+Parg-6	Diab-18	Diab-12	Diab-11	Ctrl-5	Ctrl-4	Ctrl-2
1	DATA	4	1	4	ref|NM_015742|ref|NM_001142322|ref|NM_001142323|ens|ENSMUST00000170242	mm|chr8:73884459-73884518	0	NA	6947	ACGGAGCCAGGGACTTGGAACCTTTAGGAACAATCAGTGCATCCGGTGACAGCCTGGGTT	3	0	A_51_P399985	Myo9b	NM_015742	ref|Mus musculus myosin IXb (Myo9b), transcript variant 3, mRNA [NM_015742]	1.05919	0.269119	0.664816	0.0777071	2.43859	2	0	0	0	1.32695	1.33248	1.19712	1.26405	1.15913	0.754403	0.652655	0.747887	0.593906	0.93143	1.04213	0.997853
5	DATA	9	1	9	ref|NM_013747|ref|NM_001199004|ens|ENSMUST00000179218|ens|ENSMUST00000021609	mm|chr12:103735935-103735994	0	NA	2489	ATTAAGCTCAACTTTTTCTGAGTTCAGTTCCCTAGATATGTATAGAGAAAGAGAAAAGGC	13	0	A_51_P211903	Golga5	NM_013747	ref|Mus musculus golgi autoantigen, golgin subfamily a, 5 (Golga5), transcript variant 2, mRNA [NM_013747]	0.781443	0.269738	1.04252	0.0506831	1.64759	2	0	0	0	1.54337	0.806393	1.06481	0.873946	0.992758	0.477624	1.02586	1.09943	1.00226	0.973239	1.02178	1.11853
8	DATA	14	1	14	ref|NM_026655|ens|ENSMUST00000059438|ref|XM_011241888|ref|XM_011241889	mm|chr7:138486811-138486752	0	NA	1634	GGACTTCTAATGCACTTCGTTAGCTTGTGTTGTATATTACATGTGTTTGAAGTGGATTTT	23	0	A_55_P2728466	2310057M21Rik	NM_026655	ref|Mus musculus RIKEN cDNA 2310057M21 gene (2310057M21Rik), mRNA [NM_026655]	0.811173	0.115797	1.13885	0.144467	3.06539	3	0	0	0	1.30371	0.791541	0.887901	0.751455	0.944638	0.737425	0.981178	1.17051	1.26486	0.923824	1.11377	1.12919
11	Mean	17	1	17	ref|NM_007907|ens|ENSMUST00000047864|gb|AK195498|gb|AK190272	mm|chr10:80645059-80645118	0	NA	2904	CGCGCAGATGTCCAAAAGTCTAAATAAATGCATTCAGAGGTTTTTGGGGTCCATGGCCAA	29	0	A_66_P135936	Eef2	NM_007907	ref|Mus musculus eukaryotic translation elongation factor 2 (Eef2), mRNA [NM_007907]	0.91171	0.0649509	1.01222	0.0343197	2.36976	3	0	0	0	1.10673	1.11726	0.990837	0.957344	0.940438	0.83735	0.972623	1.0306	1.03343	1.01982	0.957691	1.03589
12	DATA	18	1	18	ref|NM_008209|ens|ENSMUST00000027744|ens|ENSMUST00000191773|ens|ENSMUST00000194612	mm|chr1:156975091-156975032	0	NA	2425	CACCACCACCACTAATAACAAACAAAAACTAAAACTTTGGATCTTTCTTCTGTAAGTGGT	31	0	A_55_P2805396	Mr1	NM_008209	ref|Mus musculus major histocompatibility complex, class I-related (Mr1), mRNA [NM_008209]	0.819681	0.0320201	1.08437	0.181108	2.4927	2	0	0	0	1.21592	1.23761	0.835189	0.837886	0.782709	0.838448	0.923743	1.04871	1.28065	0.882388	1.035	1.08175
14	DATA	20	1	20	ref|NM_153560|ens|ENSMUST00000048375|ens|ENSMUST00000136816|gb|BC024513	mm|chr2:32425212-32425270	0	NA	4158	AAATCAGCCTAGTGTCAATGTTTGGTTTGGGGGTGGAATTAAATGCCGATGTTTTTGTTA	35	0	A_55_P2909714	Fam102a	NM_153560	ref|Mus musculus family with sequence similarity 102, member A (Fam102a), mRNA [NM_153560]	0.986014	0.0636005	0.743166	0.0749172	4.28017	3	0	0	0	1.39763	1.55206	1.25139	1.059	0.94243	0.956616	0.755405	0.662883	0.81121	0.777935	0.936693	0.896743
15	DATA	21	1	21	ref|NM_011827|ens|ENSMUST00000075062|gb|BC145545|gb|BC145824	mm|chr7:31202865-31202806	0	NA	307	AAGATGGTAGAGTCTACATCAACATGCCTGGCAGAGGCTGACCACGGCACCTTCTGACCC	37	0	A_55_P2744310	Hcst	NM_011827	ref|Mus musculus hematopoietic cell signal transducer (Hcst), mRNA [NM_011827]	1.18513	0.166308	0.60057	0.043687	5.88822	2	0	0	0	0.864692	0.987109	1.28182	0.995637	1.25289	1.30686	0.550445	0.620721	0.630545	0.764081	1.14364	1.60157
20	DATA	27	1	27	ref|NM_175659|ref|NM_178182|ref|NM_178188|ref|NM_178189	mm|chr13:22127094-22127035	0	NA	418	CCCAACATCCAGGCCGTGCTGCTGCCCAAGAAGACCGAGAGCCACCACAAGGCCAAGTGA	49	0	A_55_P2084656	Hist1h2ah	NM_175659	ref|Mus musculus histone cluster 1, H2ah (Hist1h2ah), mRNA [NM_175659]	1.14917	0.144662	0.761336	0.161202	3.10142	3	0	0	0	0.906845	1.06811	1.20522	1.12696	1.0169	1.30366	0.915058	0.775376	0.593573	1.01244	1.044	1.03186
29	DATA	51	1	51	ref|NM_013859|ens|ENSMUST00000162726|gb|AK086863|gb|AK164029	mm|chr19:6062186-6062245	0	NA	979	TGTGATTGGTGGAGAGCGAGATCGACTTTACCGGGCTCGGAAGAAGTGCCAGTTCCTGCT	97	0	A_51_P290601	Znhit2	NM_013859	ref|Mus musculus zinc finger, HIT domain containing 2 (Znhit2), mRNA [NM_013859]	1.12259	0.0452446	0.798469	0.23949	2.30339	2	0	0	0	1.12178	1.29291	0.975032	1.17383	1.08815	1.10579	0.976365	0.892878	0.526163	0.89084	0.942108	1.01415
44	DATA	83	1	83	ref|NM_146866|ens|ENSMUST00000054868|tc|NP646734|nap|NAP057858-1	mm|chr2:85530201-85530260	0	NA	613	TGAATTTGCTCTCCTCTCTTCTGATAGTCCTTGGATTATATGTCCTGATTCTGATAGCCA	161	0	A_55_P2112403	Olfr1008	NM_146866	ref|Mus musculus olfactory receptor 1008 (Olfr1008), mRNA [NM_146866]	0.723933	0.0753267	1.42766	0.0779269	11.2463	3	0	0	0	1.25436	1.09013	0.735944	0.655574	0.804689	0.711534	1.49613	1.34286	1.44399	1.00329	0.580751	0.880741
58	DATA	111	1	111	ref|NM_011653|ens|ENSMUST00000097014|gb|M13445|gb|M28729	mm|chr15:98780293-98780278	0	NA	1504	TTCATACAGTTACTGACTTATGAATGATTGATTTTGACAGAGACCCCAAGCTGCCCATTT	217	0	A_51_P169745	Tuba1a	NM_011653	ref|Mus musculus tubulin, alpha 1A (Tuba1a), mRNA [NM_011653]	1.17681	0.148165	0.873894	0.0584709	3.29387	2	0	0	0	0.952998	0.923736	1.26311	1.23046	1.00929	1.29068	0.90964	0.806418	0.905625	0.993056	0.83113	0.883857
59	DATA	112	1	112	gb|AK050111|tc|TC1606755|riken|C730016I12|nap|NAP077299-1	mm|chr8:46352115-46352056	0	NA	2443	GGTGCCTGACACCAATGGATTAAAATGTAACTTCTGAACAACTACCTTCTAACAAAATAA	219	0	A_55_P2412349	AW111846	AK050111	gb|Mus musculus adult male liver tumor cDNA, RIKEN full-length enriched library, clone:C730016I12 product:unclassifiable, full insert sequence. [AK050111]	0.00127641	0	1.32229	2.28807	1	2	0	0	0	3.19742	2.12629	2.70174	0.00127641	0.00127641	0.00127641	0.00127641	0.00127641	3.96433	0.00127641	0.00127641	0.00127641
63	DATA	117	1	117	ref|NM_016693|ens|ENSMUST00000134895|ens|ENSMUST00000030677|ref|XM_006539040	mm|chr4:132808672-132808731	0	NA	4161	ACAGATACGGATGGATGAACAGAGAAGACACAAACAGCTTTGGACACACCTGTCCTAGAA	229	0	A_55_P2106039	Map3k6	NM_016693	ref|Mus musculus mitogen-activated protein kinase kinase kinase 6 (Map3k6), mRNA [NM_016693]	1.30125	0.367726	0.642093	0.122348	2.94597	2	0	0	0	1.20527	0.96318	1.17473	1.72446	1.11955	1.05975	0.637442	0.766701	0.522138	0.79134	1.05002	0.985428
73	DATA	136	1	136	ref|NM_001284410|ref|NM_001291016|ens|ENSMUST00000089634|gb|AK162975	mm|chr2:127957112-127957171	0	NA	2204	TTGTTTACTGTTTGGAAGTCGTTTTACTCGATAGCAGCCTCCATATACTTTGGGGGGATC	267	0	A_55_P2504051	Bcl2l11	NM_001284410	ref|Mus musculus BCL2-like 11 (apoptosis facilitator) (Bcl2l11), transcript variant 4, mRNA [NM_001284410]	0.644717	0.0116596	1.18209	0.556759	1.67136	2	0	0	0	1.32981	1.20515	0.954381	0.641595	0.65762	0.634936	1.82094	0.800382	0.924934	1.27716	0.933987	0.819111
77	DATA	144	1	144	ref|NM_001110239|ref|NM_021330|ens|ENSMUST00000118119|ens|ENSMUST00000062740	mm|chr12:31581042-31580983	0	NA	417	AAATTGAGCTACTTGGGAGCTATGATCCATAGAAACAGCTCATCATTGAAGATCCCTATT	283	0	A_55_P2186615	Acp1	NM_001110239	ref|Mus musculus acid phosphatase 1, soluble (Acp1), transcript variant 1, mRNA [NM_001110239]	0.839478	0.145786	1.25396	0.144857	3.49318	3	0	0	0	0.512363	1.35283	1.067	0.842709	0.983622	0.692104	1.37852	1.28837	1.095	0.963623	0.846093	0.977776
79	DATA	148	1	148	ref|NM_199447|ens|ENSMUST00000038677|gb|AK122346|gb|BC062977	mm|chr19:41937401-41937342	0	NA	4259	GTCTGCGTGTGTAAGATCTGCTCTAACCAGGCGTAGAATAAATGTGCATGACCATGTTTC	291	0	A_55_P2759760	Rrp12	NM_199447	ref|Mus musculus ribosomal RNA processing 12 homolog (S. cerevisiae) (Rrp12), mRNA [NM_199447]	1.27924	0.102587	0.947265	0.166222	2.94373	3	0	0	0	0.573537	0.720149	0.944916	1.17101	1.37505	1.29166	1.08413	0.995368	0.762297	0.96449	1.05552	1.06187
80	DATA	151	1	151	ref|NM_175277|ens|ENSMUST00000134765|ens|ENSMUST00000055875|ens|ENSMUST00000148875	mm|chr6:83308210-83308269	0	NA	353	CTGACTGACTGCTCACGCTTAAAACCTGGAGTGCACTTCACTCACAGCAGTATTTTAGAA	297	0	A_51_P408162	Bola3	NM_175277	ref|Mus musculus bolA-like 3 (E. coli) (Bola3), mRNA [NM_175277]	1.21702	0.232986	0.913307	0.100252	2.07402	2	0	0	0	0.689396	0.854513	0.974952	1.00517	1.17936	1.46655	0.941748	0.996265	0.801908	1.02526	1.0529	1.01198
85	DATA	159	1	159	ref|NM_145437|ens|ENSMUST00000045075|gb|BC019814|gb|AK028662	mm|chr11:114843855-114843796	0	NA	2341	GTTCTAGGTCAGTCTGCTTTACAGAGTGAGTTATAGGACTACACAGAGAAATCCAAAAAA	313	0	A_55_P1983523	Cd300ld	NM_145437	ref|Mus musculus CD300 molecule-like family member d (Cd300ld), mRNA [NM_145437]	1.2989	0.164247	0.721273	0.0333827	5.96927	2	0	0	0	1.1729	0.769452	0.978817	1.1809	1.22932	1.48649	0.734062	0.683387	0.746371	1.04324	1.02888	0.946197
86	DATA	168	2	4	ref|NM_025692|ens|ENSMUST00000035166|ref|XM_006511791|gb|AK017787	mm|chr9:103949912-103949853	0	NA	1407	TATTTTCTCTGCTTATGCTAGTCCCTTGGAATTGAACAATCGGAACTAATAAAACTTAGC	4	0	A_51_P403693	Uba5	NM_025692	ref|Mus musculus ubiquitin-like modifier activating enzyme 5 (Uba5), mRNA [NM_025692]	0.964728	0.0727055	0.785042	0.0925464	2.64444	3	0	0	0	1.52341	1.27249	1.11117	0.952032	1.04295	0.899207	0.802165	0.867832	0.685131	0.836749	0.986398	1.02047
93	DATA	189	2	25	ref|NM_010755|ref|NM_001304832|ref|NM_001304831|ref|NM_001304830	mm|chr15:79189442-79189501	0	NA	1893	GCCAGTTATCTGCCTTGAGTATTTTGTAGACTTTCTGAATAAAGTCAAGTTCTCTTTTTC	46	0	A_52_P608322	Maff	NM_010755	ref|Mus musculus v-maf musculoaponeurotic fibrosarcoma oncogene family, protein F (avian) (Maff), transcript variant 1, mRNA [NM_010755]	1.53042	0.228325	0.907506	0.31154	2.79331	3	0	0	0	1.07168	0.69225	0.638956	1.34016	1.46749	1.78361	0.974173	1.18032	0.56803	0.832143	0.639089	0.812107
94	Mean	190	2	26	ens|ENSMUST00000084281|nap|NAP092747-001	mm|chr5:134939201-134939260	0	NA	91	TAGTGGAATTTATGGATGACACCAGCCGCTCTATCATCCGAAATGTCAAAGGTCCCGTAA	48	0	A_55_P2055881	ENSMUST00000084281	ENSMUST00000084281	ens|predicted gene 16020 [Source:MGI Symbol;Acc:MGI:3801865] [ENSMUST00000084281]	0.949389	0.0392426	1.01579	0.00843565	2.86545	2	0	0	0	0.926131	1.11972	1.00578	0.973152	0.904094	0.970922	1.00722	1.02408	1.01608	1.02611	1.00437	1.02235
97	DATA	197	2	33	ens|ENSMUST00000156595|gb|AK008728|tc|TC1655843|riken|2210015B19	mm|chr13:3633969-3634028	0	NA	396	GCTGAAGAAGTGTCCTCTGTACCTTTGGGCTGTTTTAATCCATAAAATGAATTTGAAGGC	62	0	A_55_P2716771	Asb13	ENSMUST00000156595	ens|ankyrin repeat and SOCS box-containing 13 [Source:MGI Symbol;Acc:MGI:2145525] [ENSMUST00000156595]	0.437742	0.405283	1.06584	0.199041	2.40941	2	0	0	0	0.992187	1.82046	1.96416	0.800299	0.512724	0.00020468	0.836118	1.1868	1.17461	0.725761	1.00276	0.983914
98	DATA	198	2	34	gb|AK015366|riken|4930442P07|nap|NAP074225-1	mm|chr17:27463895-27463954	0	NA	1597	GCCTGGGCAGGTCCCATCCTCTTTGCATTCCATTTTAGAAGAATAAATACTTTCTAGAGC	64	0	A_55_P2205306	4930442P07Rik	AK015366	gb|Mus musculus adult male testis cDNA, RIKEN full-length enriched library, clone:4930442P07 product:unclassifiable, full insert sequence. [AK015366]	0.52397	0.459443	1.42251	0.391057	2.57952	3	0	0	0	0.910861	1.16577	0.810655	0.712427	0.85922	0.000263699	1.86216	1.11347	1.29191	0.89416	1.22181	1.15731
103	DATA	205	2	41	ref|NM_011756|ens|ENSMUST00000051241|gb|X14678|gb|AK154825	mm|chr7:29162022-29161963	0	NA	1545	CCCCCAACCAGTGGGCCCTTTATTTATGACGACTTTATTTATTGTATTAAGATTTAATAG	78	0	A_55_P2797255	Zfp36	NM_011756	ref|Mus musculus zinc finger protein 36 (Zfp36), mRNA [NM_011756]	1.7343	0.503556	0.814769	0.246314	2.84118	2	0	0	0	0.66866	0.868289	0.721924	1.30651	1.60716	2.28925	0.609893	0.746355	1.08806	0.721924	0.653583	0.718402
113	Mean	225	2	61	ens|ENSMUST00000186115|nap|NAP097232-001	mm|chr1:134922828-134922887	0	NA	450	AAGAAATATGAGGAAAGGAAAAAGAATGCCAAAATCAGCAGCCTCCTGGAGGAGCAGCTC	118	0	A_55_P2138436	ENSMUST00000186115	ENSMUST00000186115	ens|predicted gene 29257 [Source:MGI Symbol;Acc:MGI:5579963] [ENSMUST00000186115]	0.950557	0.0392435	1.04652	0.0451609	2.77808	3	0	0	0	0.908885	1.08866	0.946643	0.917604	0.940096	0.993971	1.05361	0.998231	1.08771	1.02499	0.993564	1.04602
132	Mean	268	2	104	ref|NM_024218|ens|ENSMUST00000117563|ens|ENSMUST00000134617|ens|ENSMUST00000023269	mm|chr16:55970228-55970287	0	NA	491	TGCCAAGGAAGCAAAAAAGGCTAAGCAGGCATCAAAGAAGACAGCAATGGCTGCTGCCAA	204	0	A_55_P2004333	Rpl24	NM_024218	ref|Mus musculus ribosomal protein L24 (Rpl24), mRNA [NM_024218]	1.0691	0.0336162	0.935286	0.105743	2.08884	2	0	0	0	1.0069	0.950442	0.967441	1.04755	1.05191	1.10783	1.0165	0.973635	0.815719	0.999283	1.04204	1.02073
138	DATA	278	2	114	ref|NM_001017968|gb|BG173659|tc|TC1630990|nap|NAP099235-001	mm|chr4:133162968-133162909	0	NA	2785	CCTTTCGTTCGAGCCAGTATCTTTGTTCCCGTTTGTAATAAAGCTTCTGTTTTAAGAGCT	224	0	A_55_P1953650	Zdhhc18	NM_001017968	ref|Mus musculus zinc finger, DHHC domain containing 18 (Zdhhc18), mRNA [NM_001017968]	1.11514	0.0626335	0.797808	0.125079	3.92921	2	0	0	0	1.02376	0.937132	1.19596	1.16804	1.04598	1.1314	0.701723	0.752468	0.939234	1.03232	1.02736	1.04463
146	DATA	293	2	129	ref|NM_011073|ens|ENSMUST00000035419|gb|BC137962|gb|BC132300	mm|chr10:60766941-60767000	0	NA	1983	ACTGCCTCAGCCCTGCAATGCCCGAAAGCTTGGCAACTACTGCCACGAAGCGTAAACATG	254	0	A_55_P2000039	Prf1	NM_011073	ref|Mus musculus perforin 1 (pore forming protein) (Prf1), mRNA [NM_011073]	0.678015	0.0339357	1.42842	0.302651	4.26776	2	0	0	0	0.985716	0.889684	1.00088	0.716124	0.65106	0.666861	1.74996	1.14909	1.3862	0.89488	0.900035	1.0095
150	DATA	301	2	137	ref|NM_026147|ens|ENSMUST00000103009|ens|ENSMUST00000130128|gb|AK150867	mm|chr4:3761679-3761620	0	NA	442	TTGAGGTTGAAGTCACCATTGCAGATGCCTAAGACAACTGAATAAATCGTCTTAATGGTC	270	0	A_55_P2121543	Rps20	NM_026147	ref|Mus musculus ribosomal protein S20 (Rps20), mRNA [NM_026147]	0.85699	0.126785	1.04968	0.0771097	2.24909	3	0	0	0	1.52144	1.08651	0.877275	0.87845	0.971675	0.720845	1.13263	0.980175	1.03624	0.950697	0.947804	0.896263
151	DATA	302	2	138	gb|AK090142|riken|G630005B13|nap|NAP072863-1	mm|chr9:54544571-54544512	0	NA	1665	CAGTTACATGTTTATCTTCATGGTTGCTATCCCTTCCCCAAATCTTTATTGCAGATGGCG	272	0	A_55_P2576195	AK090142	AK090142	gb|Mus musculus 13 days embryo spinal cord cDNA, RIKEN full-length enriched library, clone:G630005B13 product:unclassifiable, full insert sequence. [AK090142]	0.793588	0.179754	1.18079	0.174136	2.67973	3	0	0	0	1.4638	1.24603	0.750104	0.604577	0.962374	0.813813	1.32704	0.988161	1.22717	0.83486	0.707299	1.07477
170	DATA	349	3	21	ref|NM_013607|ref|NM_001161775|ens|ENSMUST00000090287|ref|XM_006521844	mm|chr16:14198147-14195223	0	NA	5969	ACCAGGAGAGGAAACGAGGCTTCATTTGTTCCTTCCAGAAGGGCTGGGGGCCGTAGAGTT	355	0	A_51_P362429	Myh11	NM_013607	ref|Mus musculus myosin, heavy polypeptide 11, smooth muscle (Myh11), transcript variant 1, mRNA [NM_013607]	1.05628	0.299819	0.515167	0.155324	2.77564	3	0	0	0	1.14454	1.77051	1.60514	1.39199	0.961665	0.81518	0.672953	0.51012	0.362428	0.641489	1.30115	0.822845
179	DATA	368	3	40	ref|NM_020035|ref|NM_001305386|ref|NM_001305387|ens|ENSMUST00000098109	mm|chr4:43030569-43030510	0	NA	4194	TACATCTGACGGACAACAGGGGCGGCTACCAAAGTGGAATAAAAGAACAATGTGAATGTT	393	0	A_55_P2042202	Pigo	NM_020035	ref|Mus musculus phosphatidylinositol glycan anchor biosynthesis, class O (Pigo), transcript variant 1, mRNA [NM_020035]	1.07925	0.0734305	0.833359	0.0989481	3.45645	3	0	0	0	0.908266	1.12305	0.939542	1.10447	0.996534	1.13675	0.897305	0.883386	0.719387	1.02347	1.14478	1.12305
182	DATA	378	3	50	gb|BC068261|tc|TC1610616	mm|chr17:47435753-47435812	0	NA	3047	AGGTCATTCCTGAGTGTTAATGTCTCCTCTCTGAGATAGAGTAGTTCTGACTGGCAGGAT	413	0	A_65_P08987	BC068261	BC068261	gb|Mus musculus cDNA clone IMAGE:30011828, partial cds. [BC068261]	0.169463	0.29274	2.01009	1.50876	2.07435	2	0	0	0	1.27941	1.50815	1.44196	0.50749	0.000449969	0.000449969	3.55401	0.539138	1.93712	0.000449969	0.496053	0.735324
183	Mean	383	3	55	ens|ENSMUST00000121305|nap|NAP093966-001	mm|chr2:166912964-166912905	0	NA	275	TGCGCATGCTTAAAAATGCCGAGAGTAACGCTGAACTTAAGGGTTTAGATGTAGATTCTC	423	0	A_52_P350306	ENSMUST00000121305	ENSMUST00000121305	ens|predicted gene 11472 [Source:MGI Symbol;Acc:MGI:3650288] [ENSMUST00000121305]	0.98877	0.0230633	1.10186	0.0453526	3.84996	2	0	0	0	0.972392	0.914118	0.813712	0.981945	0.969888	1.01447	1.15423	1.0752	1.07616	1.00221	0.893386	1.13228
187	DATA	398	3	70	ref|NM_001290814|ens|ENSMUST00000039827|ref|XM_011238443|ref|XM_011238444	mm|chr1:38238112-38236364	0	NA	3663	AAACAGAGAGTTCTTCAATGACCTGGATTTGCTCATGGGACCTGTCACCCTGCACAGCAG	453	0	A_51_P388329	Aff3	NM_001290814	ref|Mus musculus AF4/FMR2 family, member 3 (Aff3), mRNA [NM_001290814]	0.592681	0.247242	2.13641	1.04039	2.50038	2	0	0	0	0.558568	0.687096	0.259939	0.396258	0.511471	0.870315	2.95163	0.96462	2.49298	0.728912	0.658926	0.919283
192	DATA	406	3	78	ref|NM_021476|ref|NM_001281859|ref|NM_001281862|ens|ENSMUST00000064892	mm|chrX:103773276-103773217	0	NA	1550	TGGAAACTTTAGGAGAAGGCTATCTACATTTAGAAAGCATTCTTTGTCCAGTATGACTTA	469	0	A_51_P140017	Cysltr1	NM_021476	ref|Mus musculus cysteinyl leukotriene receptor 1 (Cysltr1), transcript variant 1, mRNA [NM_021476]	0.705842	0.0596394	1.50583	0.369028	3.7067	2	0	0	0	1.5374	0.59702	0.348505	0.708623	0.764042	0.64486	1.87325	1.13522	1.50903	0.639714	1.02994	1.2124
195	DATA	412	3	84	ref|NM_181415|ens|ENSMUST00000077282|ref|XM_006527049|ref|XM_011247244	mm|chr19:58207517-58207577	0	NA	6269	CATGTTGATTTCCCCATGAAATTGGCAGCATGGTCCTGTAAAGAAATAGTTATTGAAAAA	481	0	A_55_P2819657	Atrnl1	NM_181415	ref|Mus musculus attractin like 1 (Atrnl1), mRNA [NM_181415]	0.788198	0.12191	1.14087	0.122024	3.54141	3	0	0	0	1.393	1.15071	0.726774	0.770868	0.917846	0.67588	1.06109	1.28134	1.08018	0.828123	0.880553	1.23363
199	DATA	425	3	97	ref|NM_001205234|ref|NM_020253|ref|NM_001205235|ens|ENSMUST00000154580	mm|chr19:6532125-6532184	0	NA	5567	AAAGACAAAGAGTATTACGTCTGAGCACCCAGTCCAGGCACCCCACTGCCAGCTGCTCCT	505	0	A_55_P1954067	Nrxn2	NM_001205234	ref|Mus musculus neurexin II (Nrxn2), transcript variant 1, mRNA [NM_001205234]	0.850496	0.0517913	1.06743	0.0493102	5.25434	3	0	0	0	1.0431	1.20285	1.13301	0.83397	0.908533	0.808984	1.08225	1.01241	1.10763	0.949848	0.780261	1.13714
200	DATA	428	3	100	gb|AK085441|gb|BI855049|tc|TC1620575|riken|D630025K20	mm|chr8:84862444-84862385	0	NA	2118	TCTAAACATGTTTCATGTTGGGCAGGTCCAACTATTTTTCCTTGGAGAGATGATAAAATT	511	0	A_55_P2733222	Il15	AK085441	gb|Mus musculus 0 day neonate kidney cDNA, RIKEN full-length enriched library, clone:D630025K20 product:interleukin 15, full insert sequence. [AK085441]	1.14284	0.21671	0.420434	0.149782	4.74976	3	0	0	0	0.938849	1.69366	1.14699	1.35488	1.15192	0.921741	0.356902	0.591511	0.312889	1.1514	1.29707	1.08219
205	DATA	438	3	110	ref|NM_001033488|ens|ENSMUST00000085790|ens|ENSMUST00000150764|gb|AK171660	mm|chr12:4869305-4869246	0	NA	3063	CCTCTTCTGGTGTGCCTGAAGACAGCTAGAGTGTACTTATGTATATTAATAAATAAATCT	530	0	A_55_P2159740	Mfsd2b	NM_001033488	ref|Mus musculus major facilitator superfamily domain containing 2B (Mfsd2b), mRNA [NM_001033488]	1.0237	0.0724798	0.836323	0.0596754	3.4568	3	0	0	0	1.02801	1.04718	1.15443	1.01201	0.957774	1.10131	0.772539	0.890796	0.845634	1.06578	1.04045	1.08408
207	Mean	443	3	115	ref|XM_011251191|ref|XR_379934|ref|XR_406087|gb|BC058114	mm|chr16:55971494-55971553	0	NA	493	GGAAACGCTAGTGTGGTAGAGCAGAGTTGGAAATAAAGCTCTATCTTTAACTCTAAAAAA	540	0	A_55_P2059556	LOC102641064	XM_011251191	ref|PREDICTED: Mus musculus 60S ribosomal protein L24-like (LOC102641064), mRNA [XM_011251191]	1.12574	0.0319801	0.893198	0.163972	2.41091	2	0	0	0	0.984615	1.07619	0.83356	1.11844	1.16073	1.09803	1.05048	0.90585	0.723267	1.08762	1.01332	0.947899
209	DATA	447	3	119	gb|AK142964|riken|E030020L17	mm|chr2:66551301-66551242	0	NA	2121	GCACATCAGAATTAGCTTTGAACATTGTGCTCAAATGTAAACAATGACCTCCTCAATTTT	548	0	A_55_P2735390	Scn7a	AK142964	gb|Mus musculus 0 day neonate lung cDNA, RIKEN full-length enriched library, clone:E030020L17 product:sodium channel, voltage-gated, type VI, alpha polypeptide, full insert sequence. [AK142964]	0.524233	0.0318993	1.13999	0.588725	1.80893	2	0	0	0	0.612376	4.76692	0.280696	0.540423	0.544791	0.487485	1.81978	0.803567	0.796628	0.491083	0.47515	0.381097
215	DATA	460	3	132	ref|NM_001081194|ens|ENSMUST00000107363|ens|ENSMUST00000107361|ref|XM_006533646	mm|chr11:100608122-100608063	0	NA	2194	TGCCTTCCGGGCTGGCCTACCCCGGGACCTAACCTTCAACCTGCGCCAAGGTTCTGAAAA	573	0	A_66_P112714	Kcnh4	NM_001081194	ref|Mus musculus potassium voltage-gated channel, subfamily H (eag-related), member 4 (Kcnh4), mRNA [NM_001081194]	0.84547	0.0695085	1.15099	0.164487	2.96338	2	0	0	0	1.29818	0.880196	0.79494	0.861911	0.769214	0.905283	1.29797	0.973318	1.18167	1.08557	0.965239	0.986499
218	DATA	467	3	139	ref|NM_001144855|ens|ENSMUST00000168515|ref|XM_006529851|ref|XM_006529849	mm|chr1:136229121-136229062	0	NA	384	AAGGCTCTCTCCATTCCCATCATGTGTGAGGTGATGCCCACAATCAATGAGGGGGACCCC	586	0	A_55_P2016924	Ppfia4	NM_001144855	ref|Mus musculus protein tyrosine phosphatase, receptor type, f polypeptide (PTPRF), interacting protein (liprin), alpha 4 (Ppfia4), mRNA [NM_001144855]	0.618537	0.0486846	0.916694	0.120491	3.97386	2	0	0	0	1.96633	2.06907	1.02096	0.654069	0.638499	0.563045	0.986027	0.777563	0.986493	0.791137	0.658793	0.888016
219	DATA	468	3	140	ref|NM_007652|ref|NM_001111060|ens|ENSMUST00000153312|ens|ENSMUST00000168176	mm|chr2:103954170-103954229	0	NA	349	TGTCATGGTGAGATCATTATGGACCAATTAGAAGAGACAAAATTAAAATTCAGATGCTGC	588	0	A_52_P40257	Cd59a	NM_007652	ref|Mus musculus CD59a antigen (Cd59a), transcript variant 2, mRNA [NM_007652]	0.746569	0.179082	0.991412	0.0790255	2.16652	2	0	0	0	2.04926	0.859417	0.895752	0.813581	0.88248	0.543645	1.04334	1.03043	0.900466	1.05219	0.930201	0.999244
220	DATA	469	3	141	ref|NM_026531|ref|NM_001162939|ens|ENSMUST00000107425|ens|ENSMUST00000107421	mm|chr7:86053197-86053256	0	NA	2057	TTACTGGGAGAAGTCAGCTTGCTCATAGTACCAGACCATCGGCATAGGAATAAAGTGCAT	590	0	A_55_P2141860	Aen	NM_026531	ref|Mus musculus apoptosis enhancing nuclease (Aen), transcript variant 1, mRNA [NM_026531]	1.12561	0.10864	0.885042	0.109126	2.70597	3	0	0	0	1.27673	0.944838	0.951559	1.25094	1.05836	1.06752	1.01058	0.831682	0.812863	0.975143	0.923697	0.89608
227	DATA	485	3	157	ref|NM_133795|ens|ENSMUST00000147984|ens|ENSMUST00000048578|gb|AK019021	mm|chr11:43558669-43558610	0	NA	332	AAGCCAGCGATGATTTTAGTTCTGAACTGGATGAAGAATACCTAATTGAACTGGAAAAAA	620	0	A_55_P2796441	Ttc1	NM_133795	ref|Mus musculus tetratricopeptide repeat domain 1 (Ttc1), mRNA [NM_133795]	1.15753	0.021803	0.836648	0.11289	4.83395	2	0	0	0	0.771405	0.973208	1.24317	1.15212	1.18153	1.13895	0.953897	0.827355	0.728691	1.12897	1.08351	0.817188
235	DATA	515	4	23	ref|NM_001100109|ens|ENSMUST00000110708|gb|AK136033|tc|TC1678638	mm|chr12:56290133-56290192	0	NA	3218	TTATCCATAGAGCCATGTCATTGGCCACAGTTCCAAAGAAAGAGAGGAAGGAAGGAAAGG	360	0	A_55_P1979818	Srp54b	NM_001100109	ref|Mus musculus signal recognition particle 54B (Srp54b), mRNA [NM_001100109]	1.54641	0.408386	0.526348	0.468703	2.84208	3	0	0	0	0.844139	0.84662	0.719433	1.83689	1.72288	1.07947	0.898863	0.680099	8.04772e-05	1.42344	0.929377	1.01871
243	DATA	529	4	37	ref|NM_025812|ens|ENSMUST00000034879|ref|XM_006511368|gb|BC068257	mm|chr9:56335455-56336436	0	NA	734	TGATATCCCTATATTTACCGAAGAATTCCTGAACCACAGCAAAGCTCGTGAGGCAGAGCT	388	0	A_55_P2743035	Hmg20a	NM_025812	ref|Mus musculus high mobility group 20A (Hmg20a), mRNA [NM_025812]	1.10302	0.0634568	0.909483	0.0746922	3.42019	3	0	0	0	0.818283	1.13976	0.913869	1.17583	1.05953	1.07369	0.845279	0.891712	0.991458	0.962902	1.00602	1.12168
254	DATA	546	4	54	ens|ENSMUST00000029125|gb|AK034483|tc|TC1659938|riken|9330198P08	mm|chr3:19031490-19031431	0	NA	3584	GAAGCTTGTGTTCCAATCTCAGATCTACCCATATTCTGATTTTAAAGAATTGTTACAGGA	422	0	A_66_P136846	Armc1	ENSMUST00000029125	ens|armadillo repeat containing 1 [Source:MGI Symbol;Acc:MGI:1921502] [ENSMUST00000029125]	0.000862467	7.12895e-11	1.04639	1.13958	1.5891	2	0	0	0	1.42091	1.93228	1.74506	0.000862467	0.000862467	0.000862467	0.000862467	0.8772	2.2611	1.43888	0.929308	1.39181
258	DATA	552	4	60	ref|NM_148944|ens|ENSMUST00000034854|ref|XM_011242655|ref|XM_006510757	mm|chr9:54876044-54875985	0	NA	3404	GTCTCCAGCCCCTGAGGGAGAATATTTTAAAGTGTTTTGTTTTTAGAATTAACCTACAAT	434	0	A_55_P2182835	Chrnb4	NM_148944	ref|Mus musculus cholinergic receptor, nicotinic, beta polypeptide 4 (Chrnb4), mRNA [NM_148944]	0.516824	0.118581	1.88846	1.59232	1.48788	2	0	0	0	0.89581	0.662133	1.08649	0.621038	0.387801	0.541632	3.72711	0.966792	0.97148	0.956683	0.476583	0.706451
259	DATA	553	4	61	ref|NM_175199|ens|ENSMUST00000066285|ref|XM_006527379|ref|XM_011247368	mm|chr19:58870360-58870301	0	NA	5613	CTTGTTCACTACAAGATAGATCCAAACGTCACAGAATTCTGCAGCAGTTCACAACTAGAC	436	0	A_55_P2723230	Hspa12a	NM_175199	ref|Mus musculus heat shock protein 12A (Hspa12a), mRNA [NM_175199]	0.865397	0.0780955	1.06211	0.0833979	2.98202	3	0	0	0	1.00814	0.979008	0.967721	0.954194	0.834609	0.807389	1.01859	1.00946	1.15826	1.05917	1.05938	1.14407
264	DATA	559	4	67	gb|AK047252|gb|AK079841|tc|TC1624294|tc|TC1628770	mm|chr8:23755528-23755469	0	NA	1172	AGACATTAGAAGGTAAATATGATAGAAGTCACTAAGTCCAAGTTAAAATCTCCAGGAAGG	448	0	A_52_P129140	Polb	AK047252	gb|Mus musculus 10 days neonate cerebellum cDNA, RIKEN full-length enriched library, clone:B930042D15 product:unclassifiable, full insert sequence. [AK047252]	1.03823	0.188271	0.586554	0.295644	2.23201	3	0	0	0	1.75513	0.492283	1.24175	1.20653	1.07325	0.834908	0.246627	0.729266	0.78377	1.21838	1.21993	1.19818
265	DATA	570	4	78	ref|NM_009206|ens|ENSMUST00000114533|ref|XM_006503808|ref|XM_006503809	mm|chr5:31856303-31856362	0	NA	2316	CCTGCCCATTGGATTCTCCTCAATTTCCGTGTTTATATTTAAGTGTTTGTGTATATATGT	470	0	A_55_P1971199	Slc4a1ap	NM_009206	ref|Mus musculus solute carrier family 4 (anion exchanger), member 1, adaptor protein (Slc4a1ap), mRNA [NM_009206]	0.926245	0.108683	1.18993	0.162452	2.33666	3	0	0	0	0.989203	0.88447	1.00894	0.823818	0.914662	1.04026	1.10729	1.08541	1.37709	0.887151	0.879965	1.00175
266	DATA	573	4	81	gb|AK053951|tc|TC1600922|riken|E230006M18|nap|NAP124995-1	mm|chr7:105354959-105354900	0	NA	3924	TACATCTATCTATGCCTCATTCCCCTTCCTCTCTTATACGGGAATAAAGCCAAAGAGTTC	476	0	A_55_P2340206	E230006M18Rik	AK053951	gb|Mus musculus 2 days pregnant adult female oviduct cDNA, RIKEN full-length enriched library, clone:E230006M18 product:unclassifiable, full insert sequence. [AK053951]	0.784624	0.0704802	1.258	0.0397288	10.134	3	0	0	0	0.81313	1.33339	0.978304	0.730254	0.864254	0.759366	1.24259	1.30312	1.22828	1.00926	0.767372	0.970683
268	DATA	577	4	85	ref|NM_172405|ens|ENSMUST00000145429|ens|ENSMUST00000117364|ens|ENSMUST00000200657	mm|chr5:101235475-101235416	0	NA	844	ACATCCTTCTTTGTCAAGCTTTGCGAACATTTTTTCCAGAGTCTGAAGTTCTTCATTCTT	484	0	A_55_P2613353	Fam175a	NM_172405	ref|Mus musculus family with sequence similarity 175, member A (Fam175a), mRNA [NM_172405]	0.593124	0.122723	1.58417	0.538535	3.10774	2	0	0	0	1.04452	0.848158	0.548225	0.625597	0.696345	0.457431	1.40817	1.15565	2.18868	0.984379	0.779696	1.26315
269	DATA	579	4	87	ref|NM_010113|ens|ENSMUST00000029653|ref|XM_011240010|ref|XM_011240011	mm|chr3:129380636-129380577	0	NA	4613	CTTCTTGAAGTCTTTCCCAGTGAAAACGCTCAATTCTGCTGTTTCCATAGAATTTTTAAT	488	0	A_55_P2822952	Egf	NM_010113	ref|Mus musculus epidermal growth factor (Egf), mRNA [NM_010113]	1.05336	0.104151	0.789847	0.12988	2.74156	3	0	0	0	0.554452	0.729684	1.22607	0.971082	1.01854	1.17046	0.803341	0.912454	0.653747	1.13487	1.31959	1.50571
278	DATA	600	4	108	ref|NM_011454|ens|ENSMUST00000017184|ens|ENSMUST00000164541|ens|ENSMUST00000110293	mm|chr13:33070776-33070835	0	NA	1728	CCTTCATCCTCTCTGCAGCAATACTGGGATCTCAATTTTTTGGTTACTTAGTAATTTATT	527	0	A_55_P2013043	Serpinb6b	NM_011454	ref|Mus musculus serine (or cysteine) peptidase inhibitor, clade B, member 6b (Serpinb6b), mRNA [NM_011454]	0.792585	0.309317	1.3378	0.107646	2.88336	2	0	0	0	1.20423	1.11893	0.965135	0.563059	0.670357	1.14434	1.27523	1.27607	1.4621	0.708978	0.667707	0.943865
280	DATA	603	4	111	ens|ENSMUST00000167927|ens|ENSMUST00000171561|gb|AK029840|tc|TC1597866	mm|chr19:42015642-42015583	0	NA	7808	TTCTGATTTCCCTTCTCAGTAAATAGAGCTATGTTCTTTTGTGATCAATAAAACAGGAGC	533	0	A_52_P214936	Mms19	ENSMUST00000167927	ens|MMS19 (MET18 S. cerevisiae) [Source:MGI Symbol;Acc:MGI:1919449] [ENSMUST00000167927]	0.000401998	3.56448e-11	0.940273	1.6279	1	2	0	0	0	6.25944	1.25825	0.362401	0.000401998	0.000401998	0.000401998	0.000401998	0.000401998	2.82001	0.571842	0.351346	0.374695
282	DATA	608	4	116	ref|NM_009274|ens|ENSMUST00000196929|ens|ENSMUST00000088392|ref|XM_011249759	mm|chr5:23013246-23013187	0	NA	2363	CTCAGACCTTTGTAGTGCTTTGAGGTACTGTTGTTTGACACTTTGCTTCCTGTGCACCAT	543	0	A_52_P680856	Srpk2	NM_009274	ref|Mus musculus serine/arginine-rich protein specific kinase 2 (Srpk2), mRNA [NM_009274]	1.19093	0.260844	0.873684	0.127631	1.89217	2	0	0	0	0.785572	0.88877	1.01162	1.0503	1.03057	1.49191	1.01248	0.847193	0.761378	0.96746	1.04701	1.10574
285	DATA	614	4	122	gb|AK038322|tc|TC1593700|riken|A130095K04|nap|NAP079950-1	mm|chr3:115419560-115419619	0	NA	1492	CAGAGGAGACTTCTGCACTTGGACTCCTTACATTTGTACTTCTGATTGTACTTGTCTTTA	555	0	A_66_P122621	Gm9889	AK038322	gb|Mus musculus 16 days neonate thymus cDNA, RIKEN full-length enriched library, clone:A130095K04 product:hypothetical Proline-rich region containing protein, full insert sequence. [AK038322]	0.281301	0.251854	2.54825	2.88588	1.35542	2	0	0	0	0.555927	0.999132	0.573924	0.486396	0.357312	0.000196325	5.87176	0.676667	1.09631	0.413592	0.550201	0.418582
288	DATA	618	4	126	gb|AK089613|riken|F830005B01|nap|NAP072598-1	mm|chr13:103494284-103494343	0	NA	1729	AATGTATGCTTAGCATGTGCTAGGTCCTGGATTCAATCTTTAATAACACTGCCCTCCACG	563	0	A_55_P2935500	Cd180	AK089613	gb|Mus musculus activated spleen cDNA, RIKEN full-length enriched library, clone:F830005B01 product:lymphocyte antigen 78, full insert sequence. [AK089613]	0.755679	0.115792	1.20671	0.222771	3.11152	3	0	0	0	1.35728	0.883416	1.38305	0.622586	0.833294	0.811156	1.21259	0.98105	1.42648	0.7276	0.738158	1.02334
290	DATA	623	4	131	ref|NM_028516|ens|ENSMUST00000050306|ens|ENSMUST00000193919|gb|AK006811	mm|chr1:185857016-185856957	0	NA	861	TAAAGAATCCTAAAGCAATAGAGCTTTTTATACCTCCCTACCCCCTCAGAGAGGAAGACC	572	0	A_51_P270891	1700056E22Rik	NM_028516	ref|Mus musculus RIKEN cDNA 1700056E22 gene (1700056E22Rik), mRNA [NM_028516]	0.893434	0.141794	1.169	0.0734066	2.98931	3	0	0	0	1.41852	0.950659	0.849119	0.739002	0.923545	1.01775	1.25182	1.14323	1.11196	0.805681	0.880107	0.908605
291	DATA	625	4	133	ref|NM_010270|ens|ENSMUST00000122119|ens|ENSMUST00000031978|gb|AK019000	mm|chr6:39755388-39752503	0	NA	295	GTTTCCTTGGCCTTTACAGAGATGAGCATCAGGACTTTAAGGATGAGCAACGACGTCTAA	576	0	A_52_P579658	Mrps33	NM_010270	ref|Mus musculus mitochondrial ribosomal protein S33 (Mrps33), transcript variant 1, mRNA [NM_010270]	0.887687	0.0594662	1.08462	0.0971842	2.99374	3	0	0	0	1.44466	0.969781	0.794534	0.924617	0.919355	0.819089	1.19063	1.06347	0.999744	0.902108	0.932218	1.03979
294	DATA	630	4	138	gb|AK137940|gb|BB158704|riken|A130041K16	mm|chr15:97581523-97581582	0	NA	1232	AGACATCCGCCTTCCTGACCCTCGATTTCCTCTTCAATAAACCAAAGCCTGTAAGGCTCA	585	0	A_55_P2182462	Gm10835	AK137940	gb|Mus musculus 16 days neonate thymus cDNA, RIKEN full-length enriched library, clone:A130041K16 product:hypothetical protein, full insert sequence. [AK137940]	0.658454	0.0506374	1.14319	0.402664	2.06879	2	0	0	0	1.90172	1.66545	0.709333	0.715515	0.618869	0.64098	1.60768	0.929016	0.892878	0.829933	0.544631	0.943994
299	DATA	638	4	146	ref|NM_146214|ens|ENSMUST00000001720|gb|AK090244|gb|BC024120	mm|chr8:112523207-112523266	0	NA	1879	GAAGTCACCTTGGTTCCTGCCTCACTTCAGCAATACCTCACGCCCTGCGGTAGAGCTACA	600	0	A_51_P228574	Tat	NM_146214	ref|Mus musculus tyrosine aminotransferase (Tat), mRNA [NM_146214]	0.793601	0.24652	1.19293	0.0406079	2.76839	2	0	0	0	1.21883	0.884959	0.7762	0.605117	0.703106	1.07258	1.19293	1.23354	1.15232	1.03527	1.03992	1.08523
318	DATA	689	5	33	ref|NM_033572|ens|ENSMUST00000076228|ref|XM_006504538|ref|XM_006504537	mm|chr5:134639573-134639514	0	NA	933	CTTTGTCCGCTGATGGAGGTGTCTTTGGCTGGGGAAATTCCGAGTACCTGCAGTTGGCCT	695	0	A_66_P106466	Wbscr16	NM_033572	ref|Mus musculus Williams-Beuren syndrome chromosome region 16 homolog (human) (Wbscr16), mRNA [NM_033572]	0.465171	0.0702906	0.75357	0.0573299	5.50709	3	0	0	0	0.803238	4.71161	1.17219	0.384866	0.515525	0.495121	0.750825	0.812224	0.697662	0.418186	0.549407	0.689145
324	DATA	700	5	44	ref|NM_013415|ens|ENSMUST00000130394|ens|ENSMUST00000047889|gb|BC058763	mm|chr11:69413312-69413253	0	NA	2898	CCTGTGTCAGATCTACTGTAAAAAGAGGGTAAAGTACAATAAACTGAGAGCGATTATATA	717	0	A_55_P2492258	Atp1b2	NM_013415	ref|Mus musculus ATPase, Na+/K+ transporting, beta 2 polypeptide (Atp1b2), mRNA [NM_013415]	0.979663	0.0484044	0.807084	0.0865782	3.01356	3	0	0	0	1.23258	0.747597	1.18615	1.00546	0.923825	1.00971	0.735863	0.903452	0.781936	1.16664	1.08515	1.22164
332	DATA	725	5	69	ref|NM_025860|ens|ENSMUST00000001724|ens|ENSMUST00000062429|ref|XM_006529794	mm|chr1:123450529-123450470	0	NA	2131	CCTCCCCAGTACCCTTTAAAAAGAAACTTTATCACCTTTAGGATCTTTTAGTCTTTACTA	767	0	A_55_P2002702	Ddx18	NM_025860	ref|Mus musculus DEAD (Asp-Glu-Ala-Asp) box polypeptide 18 (Ddx18), mRNA [NM_025860]	0.826815	0.0924336	1.11486	0.0296499	5.13959	2	0	0	0	1.19845	1.04437	1.18513	0.730616	0.834873	0.914956	1.09124	1.10522	1.14813	0.90213	0.838162	1.00671
340	DATA	745	5	89	ref|NM_001007579|ens|ENSMUST00000105765|ens|ENSMUST00000180918|ens|ENSMUST00000105774	mm|chr4:143163568-143163627	0	NA	1969	GTGTCTGTCCTCCCCTGAAGGTTTGCATTATAAATGTCCAGTGGGGATCTCTATTTTGTT	806	0	A_55_P1959379	BC080695	NM_001007579	ref|Mus musculus cDNA sequence BC080695 (BC080695), mRNA [NM_001007579]	0.771389	0.0895513	1.15071	0.19969	3.0021	2	0	0	0	1.0266	1.09747	1.03703	0.780861	0.677478	0.855828	1.19953	0.931142	1.32147	0.997632	0.975191	1.09976
346	DATA	760	5	104	ref|NM_145934|ref|NR_102313|ens|ENSMUST00000043785|ref|XM_006523446	mm|chr17:56136567-56136508	0	NA	1463	GTGAGTTCCACGGTAGCCTGTGCTACAAAGTAAGATCTTGTTTAATAAAGCTAAAACCAA	834	0	A_55_P2852578	Stap2	NM_145934	ref|Mus musculus signal transducing adaptor family member 2 (Stap2), transcript variant 1, mRNA [NM_145934]	1.18133	0.0604304	0.676918	0.182156	4.55231	2	0	0	0	0.95988	0.977861	1.42322	1.24964	1.13484	1.15951	0.684387	0.855225	0.491143	0.987773	1.01198	1.06454
350	DATA	769	5	113	gb|AK144317|riken|G630018L09	mm|chr17:22921824-22921765	0	NA	1363	CTGCCATGATGATAATGGACTGAACCTTCGAACCTATATGACTACACCTATTAAATACCC	851	0	A_55_P2021490	Gm16386	AK144317	gb|Mus musculus cDNA, RIKEN full-length enriched library, clone:G630018L09 product:hypothetical protein, full insert sequence. [AK144317]	0.716948	0.0271628	1.17172	0.177335	4.3906	2	0	0	0	0.847458	0.815333	0.98938	0.745956	0.692113	0.712776	1.10777	1.03523	1.37216	1.20264	1.20566	1.27352
355	DATA	780	5	124	ref|NM_001039515|ref|NM_007487|ens|ENSMUST00000101472|ens|ENSMUST00000144910	mm|chr12:40763216-40763157	0	NA	354	CTGCAGTTCAACGAATTTGTAAATACCGTACCTACCAAAGGATTTAACACTGAGAAAATT	873	0	A_55_P2097665	Arl4a	NM_001039515	ref|Mus musculus ADP-ribosylation factor-like 4A (Arl4a), transcript variant 2, mRNA [NM_001039515]	0.779318	0.135394	1.26466	0.271798	2.76843	2	0	0	0	1.01436	1.3886	0.698093	0.674617	0.731119	0.932216	1.57816	1.09504	1.1208	0.867088	1.0163	0.883613
357	DATA	784	5	128	ref|NM_019511|ens|ENSMUST00000139540|ens|ENSMUST00000045374|ref|XM_006514761	mm|chr11:6577416-6577475	0	NA	1158	TGAGTGTGCTCAAGGGTTCTGTCTGCTGATGTCAGTTCTTTTTGATTAAAGTGTCTCCTT	881	0	A_55_P2101340	Ramp3	NM_019511	ref|Mus musculus receptor (calcitonin) activity modifying protein 3 (Ramp3), mRNA [NM_019511]	1.21821	0.153672	0.796627	0.0709949	4.31357	2	0	0	0	1.13696	0.884678	0.930535	1.39138	1.16513	1.09811	0.793216	0.727399	0.869266	0.996352	0.943863	1.06312
359	DATA	789	5	133	ref|NM_028132|ens|ENSMUST00000102783|ens|ENSMUST00000058351|gb|AK147982	mm|chr4:99659834-99659893	0	NA	2268	CTGTGTTATTTTGCATCTCCCATCTGCACAGATATTTGGGGTATTAAAGCAGAATGTGCT	890	0	A_55_P1987483	Pgm2	NM_028132	ref|Mus musculus phosphoglucomutase 2 (Pgm2), mRNA [NM_028132]	0.920889	0.0260938	1.02059	0.0571768	2.74759	2	0	0	0	1.37472	0.947545	0.87148	0.941349	0.929814	0.891504	0.963162	1.07751	1.02109	0.941904	0.972481	1.06744
360	DATA	791	5	135	ref|NM_008149|ens|ENSMUST00000061856|gb|AK137067|gb|AK047295	mm|chr19:55145462-55145403	0	NA	2595	GCAGAAACTCCTAGAGTATATTCTGAGTTTTGTGGTGCTGTAGCGATCTCTCAGCACCTA	893	0	A_52_P11388	Gpam	NM_008149	ref|Mus musculus glycerol-3-phosphate acyltransferase, mitochondrial (Gpam), mRNA [NM_008149]	0.619178	0.149039	1.63166	0.322016	4.94223	2	0	0	0	1.34111	0.666683	0.614982	0.459494	0.754593	0.643447	1.41198	1.48169	2.00131	0.831272	0.741426	1.05202
363	Mean	795	5	139	ref|NM_020600|ens|ENSMUST00000127568|ens|ENSMUST00000137400|ens|ENSMUST00000118551	mm|chr18:60936592-60936651	0	NA	250	TCTGCCGAGTGACTGGTGGGATGAAGGTGAAGGCTGACCGAGATGAGTCCTCTCCATATG	900	0	A_66_P134025	Rps14	NM_020600	ref|Mus musculus ribosomal protein S14 (Rps14), mRNA [NM_020600]	0.947273	0.0787757	1.07391	0.0281569	2.62186	2	0	0	0	1.07809	1.01441	0.949414	0.87031	0.943766	1.02774	1.05706	1.05824	1.10641	0.941604	0.937553	1.01538
364	DATA	803	5	147	ens|ENSMUST00000120032	mm|chr2:72970213-72970272	0	NA	411	ACATGAGTCAATACAGTCACCACCTTGGTGGAGAACAAGAATGTTCAGCTGGTGCTGATT	916	0	A_55_P2024799	ENSMUST00000120032	ENSMUST00000120032	ens|predicted gene 13666 [Source:MGI Symbol;Acc:MGI:3651577] [ENSMUST00000120032]	0.989579	0.084667	1.1495	0.0888876	2.25635	3	0	0	0	0.651182	1.27361	0.930462	0.891834	1.04014	1.03676	1.25105	1.11162	1.08582	0.905791	0.875903	0.945829
365	DATA	808	5	152	ref|NM_001081363|ens|ENSMUST00000171929|ref|XM_006497119|gb|AF194970	mm|chr1:191465993-191465934	0	NA	9621	ACTAGTTAGTCTGATTGTTTCATACACTTTTGTGGTGGTGTAGGTCATGTTTACTGTCAC	926	0	A_51_P246119	Cenpf	NM_001081363	ref|Mus musculus centromere protein F (Cenpf), mRNA [NM_001081363]	0.566215	0.105683	1.52213	0.274746	5.62449	2	0	0	0	1.05152	1.2144	0.751852	0.530524	0.685122	0.482998	1.25405	1.80309	1.50923	0.828806	0.710405	1.178
366	DATA	809	5	153	ref|NM_026391|ens|ENSMUST00000041097|ref|XM_006508015|ref|XM_006508017	mm|chr7:146074348-146074407	0	NA	1661	AAGGGAAAACCTGCTCGAAGCTGAATTGGTGGACTCTGCTCAATAAAGGCCATTACTCAA	928	0	A_51_P497061	Ppp2r2d	NM_026391	ref|Mus musculus protein phosphatase 2, regulatory subunit B, delta (Ppp2r2d), mRNA [NM_026391]	1.18703	0.177795	0.923216	0.0740944	2.3723	2	0	0	0	0.717255	0.966706	0.990705	1.04327	1.13199	1.38584	1.00051	0.916343	0.852797	0.958594	1.06371	0.972283
367	DATA	814	5	158	ref|NM_027996|ref|NM_001252081|ref|NM_001252082|ens|ENSMUST00000022358	mm|chr14:21542778-21542837	0	NA	6009	GGCGTTGGGTGGCCTCTGGTATTTATTTGGCATTTATAAATATATAAACTCCTTTTTTAC	938	0	A_55_P2039180	Zswim8	NM_027996	ref|Mus musculus zinc finger SWIM-type containing 8 (Zswim8), transcript variant 1, mRNA [NM_027996]	1.17707	0.107291	0.816344	0.0492186	5.29293	2	0	0	0	1.01739	0.962214	1.16257	1.13131	1.10024	1.29965	0.763746	0.824002	0.861285	0.951293	1.06917	0.857143
377	DATA	834	6	14	ref|NM_022011|ens|ENSMUST00000142182|ens|ENSMUST00000134842|ens|ENSMUST00000145266	mm|chr13:101250959-101250544	0	NA	834	GGCACATACCATGTTATCTTAGATGAAACCCATTACAAGGAGTTGTTGGCACATCATGTG	658	0	A_51_P323435	Gtf2h2	NM_022011	ref|Mus musculus general transcription factor II H, polypeptide 2 (Gtf2h2), mRNA [NM_022011]	0.655086	0.136565	1.48894	0.301797	4.35998	2	0	0	0	2.32755	0.531474	0.432015	0.532372	0.80221	0.630677	1.14126	1.68329	1.64227	0.662121	0.638538	0.976221
378	DATA	835	6	15	ref|NM_011207|ens|ENSMUST00000150445|ens|ENSMUST00000153926|ens|ENSMUST00000075637	mm|chr4:57275379-57275320	0	NA	472	GAGGTTTTCCCTGTACCCTGCATTTTCGAGTAAGATATTTTATACCTGATCCCAACACAC	660	0	A_51_P343757	Ptpn3	NM_011207	ref|Mus musculus protein tyrosine phosphatase, non-receptor type 3 (Ptpn3), mRNA [NM_011207]	0.58324	0.130048	1.11422	0.412023	2.12862	2	0	0	0	2.51229	0.924217	0.692857	0.650509	0.665874	0.433336	1.17406	1.49306	0.675556	0.836783	0.854716	1.08675
379	DATA	841	6	21	ref|NM_001048008|ref|NM_001284218|ens|ENSMUST00000165851|ens|ENSMUST00000167593	mm|chr13:59615613-59615554	0	NA	901	GCTTCTAACCATCTATGTAGATTGGCACCGGCATGATAATCGGCATAGAAACATGCTCAT	672	0	A_52_P445538	Agtpbp1	NM_001048008	ref|Mus musculus ATP/GTP binding protein 1 (Agtpbp1), transcript variant 2, mRNA [NM_001048008]	0.867282	0.217287	1.10772	0.0482212	1.8711	2	0	0	0	0.921054	0.89431	1.11839	1.01871	0.964817	0.618318	1.07828	1.08152	1.16337	0.869997	1.19295	1.07828
385	DATA	856	6	36	ref|NM_027409|ref|NM_001290514|ref|NR_110964|ens|ENSMUST00000023836	mm|chrX:50698845-50698786	0	NA	1172	TTTTATTTTGCACTCACTTTGATAAGGGTCATGGGTCCTTCAAAGTTTTAGACCTAAATG	702	0	A_51_P411223	Mospd1	NM_027409	ref|Mus musculus motile sperm domain containing 1 (Mospd1), transcript variant 1, mRNA [NM_027409]	0.8355	0.221832	1.15134	0.0219233	2.4541	2	0	0	0	1.16094	1.2983	0.886065	0.594014	1.03022	0.882262	1.15014	1.17384	1.13004	0.780679	0.897336	1.01617
390	DATA	873	6	53	gb|AK037310|tc|TC1614206|riken|A130005E13	mm|chr11:33968166-33968225	0	NA	1918	TATAGGTCAGCACATGACAGAGGCTTCATGGGAGCAAGAGATGTGATTGGTATTGAGTCA	736	0	A_55_P2214348	4930469K13Rik	AK037310	gb|Mus musculus 16 days neonate thymus cDNA, RIKEN full-length enriched library, clone:A130005E13 product:unclassifiable, full insert sequence. [AK037310]	0.485861	0.422871	0.000544094	0	1.98783	2	0	0	0	3.35117	4.06348	1.82362	0.681932	0.775108	0.000544094	0.000544094	0.000544094	0.000544094	0.57742	0.724552	0.000544094
396	DATA	889	6	69	gb|AK045908|riken|B230322F03|nap|NAP124772-1	mm|chr7:36341740-36341799	0	NA	1355	ACTGATCACATATTTTTAGGGTTTCGGATGAGTTAGGCTGTATTCTTGGGGCTATAGAGA	768	0	A_66_P106848	B230322F03Rik	AK045908	gb|Mus musculus adult male corpora quadrigemina cDNA, RIKEN full-length enriched library, clone:B230322F03 product:hypothetical protein, full insert sequence. [AK045908]	0.42217	0.150864	1.89492	1.06441	2.37279	2	0	0	0	0.845421	1.27515	0.937949	0.477133	0.537846	0.25153	1.77653	3.01358	0.894648	0.55152	0.61515	0.823542
401	DATA	900	6	80	ens|ENSMUST00000041638|gb|AK145040|gb|BU519104|tc|TC1718915	mm|chr1:54453067-54453008	0	NA	4362	ACTGCTATAATGTATGATTGATTCTAAGACTGATCCAGTTGTAAAGGAAAACCATGTGAG	789	0	A_52_P1116825	Gtf3c3	ENSMUST00000041638	ens|general transcription factor IIIC, polypeptide 3 [Source:MGI Symbol;Acc:MGI:2138383] [ENSMUST00000041638]	0.669482	0.205873	1.67286	0.976767	1.74099	2	0	0	0	1.05307	0.667198	0.660625	0.749465	0.82336	0.43562	2.79989	1.14717	1.07152	0.762473	0.85242	0.977192
403	DATA	906	6	86	ref|NM_011980|ref|XM_006540009|ref|XM_006540008|ref|XM_011238063	mm|chr7:30946346-30946287	0	NA	1970	AAACCTGCACACCACAAACTATAACCGATAGTAAAAGTCAGATATATGGGGGGTATTGAA	801	0	A_55_P1969530	Zfp146	NM_011980	ref|Mus musculus zinc finger protein 146 (Zfp146), mRNA [NM_011980]	0.732245	0.186126	1.4231	0.603649	1.89426	2	0	0	0	0.835775	1.13855	0.971815	0.808148	0.868425	0.520162	2.11637	1.01381	1.13911	0.816241	0.876517	0.895075
406	DATA	913	6	93	ref|NM_184088|ens|ENSMUST00000045512|ens|ENSMUST00000142837|ref|XM_006538022	mm|chr4:86471413-86471472	0	NA	3961	CGGGACTAGATCCGTTGTCTCTTTTAGCCACTGAATGTGTAGAAAAAACGTCTGATTCTG	813	0	A_55_P2736690	Dennd4c	NM_184088	ref|Mus musculus DENN/MADD domain containing 4C (Dennd4c), mRNA [NM_184088]	1.00915	0.0677613	0.667895	0.121637	4.24502	3	0	0	0	0.528456	2.65055	1.02971	0.996552	0.948567	1.08232	0.755538	0.719123	0.529023	0.722382	0.92618	1.1116
411	DATA	923	6	103	ref|NM_001033217|ens|ENSMUST00000109255|ens|ENSMUST00000048982|ref|XM_006520264	mm|chr15:93329605-93329546	0	NA	4024	TAAAGGTCCCGGTGTCACCCTGGGCTTTTCAGGGAGGTGTTTAATAAAGGCTTAATAAAC	833	0	A_55_P1954758	Prickle1	NM_001033217	ref|Mus musculus prickle homolog 1 (Drosophila) (Prickle1), mRNA [NM_001033217]	0.793591	0.020494	1.07569	0.329701	1.47912	2	0	0	0	1.01773	1.41053	1.33043	0.770706	0.799818	0.810249	0.815597	0.964971	1.4465	0.952741	0.869049	0.811688
412	DATA	924	6	104	ref|NM_028994|ens|ENSMUST00000048781|ref|XM_006519632|ref|XM_006519633	mm|chr14:56167465-56167524	0	NA	2010	ATCCCCAAGGACTTCTGGGAGCAGGAGGTTCGTGATATTCGGGGCTACCTGACAGAGCAA	835	0	A_52_P21659	Pck2	NM_028994	ref|Mus musculus phosphoenolpyruvate carboxykinase 2 (mitochondrial) (Pck2), mRNA [NM_028994]	1.00015	0.0809376	0.80481	0.0469729	3.61541	3	0	0	0	1.11571	1.22728	1.39563	1.08767	0.927995	0.984778	0.779469	0.859012	0.77595	0.973163	0.872269	1.00109
413	DATA	925	6	105	ref|NM_001033389|ref|NM_001290548|ens|ENSMUST00000055244|ens|ENSMUST00000132534	mm|chr2:31472017-31472076	0	NA	2791	TTTAGTTACAGTTTGGGGTGGGTTTGTTGTTGTTGTTGTTGTTGTTGTTGTTGGGTTTTT	837	0	A_55_P1975210	Fubp3	NM_001033389	ref|Mus musculus far upstream element (FUSE) binding protein 3 (Fubp3), transcript variant 1, mRNA [NM_001033389]	0.733578	0.0685942	1.07407	0.386212	1.50349	2	0	0	0	1.04966	1.49687	1.278	0.673738	0.718557	0.808437	0.888844	0.815361	1.51801	0.844875	1.01006	0.897589
418	DATA	937	6	117	ens|ENSMUST00000139800|nap|NAP063053-1	mm|chr8:79386823-79386764	0	NA	124	AGCAGGACATCAAGCCCAAAAGAGATCTAACATGCTTCTTTAAATGGCCCCGCTATACCA	860	0	A_55_P1970461	ENSMUST00000139800	ENSMUST00000139800	ens|predicted gene 5353 [Source:MGI Symbol;Acc:MGI:3643866] [ENSMUST00000139800]	0.63639	0.143959	1.77562	0.815539	2.38266	2	0	0	0	0.709853	1.44138	0.327069	0.541945	0.565144	0.802079	1.60169	1.06107	2.66409	0.85247	0.628657	0.804551
424	DATA	952	6	132	ref|NM_134114|ens|ENSMUST00000154156|ens|ENSMUST00000145276|ens|ENSMUST00000128087	mm|chr17:8520196-8520255	0	NA	936	TTAAAAATGTGAAACTTTATATACTTCAAGCTTAAAATTACTTATTAAGTGTAATAAAAA	889	0	A_55_P2139886	Sft2d1	NM_134114	ref|Mus musculus SFT2 domain containing 1 (Sft2d1), mRNA [NM_134114]	0.663191	0.124285	1.33428	0.0589337	8.45046	2	0	0	0	0.960711	1.12128	0.800138	0.694085	0.769114	0.526373	1.38259	1.26862	1.35163	0.985245	0.847583	1.29263
427	Mean	956	6	136	ens|ENSMUST00000079153|nap|NAP000010-001	mm|chr13:88618601-88618660	0	NA	410	CTTTGTGAGGACTAATGGAAAAGAGCTGTTGGGGCCCATTCCATACCAATTCATGGCCTA	895	0	A_66_P122877	ENSMUST00000079153	ENSMUST00000079153	ens|predicted gene 8526 [Source:MGI Symbol;Acc:MGI:3645225] [ENSMUST00000079153]	0.99147	0.00874736	1.01496	0.00260179	4.45853	2	0	0	0	1.05677	1.10241	0.938438	0.996133	0.996897	0.981379	1.01722	1.01212	1.01555	1.0058	0.996059	0.881222
433	DATA	970	6	150	ref|NM_182992|ens|ENSMUST00000095580|gb|AK039718|gb|AK220521	mm|chr10:62579084-62579025	0	NA	4704	TGCATTATCCTACCTGTGGAGTCACGTAATAAGAAGCCAAAATGTGCCTGAGATTTAAAG	923	0	A_55_P2730406	Mypn	NM_182992	ref|Mus musculus myopalladin (Mypn), mRNA [NM_182992]	1.10085	0.00434063	0.926584	0.0622359	4.83822	2	0	0	0	0.590934	1.05145	1.12326	1.10327	1.09584	1.10345	0.976106	0.946924	0.856723	1.06967	1.10893	0.973453
438	DATA	980	6	160	gb|AK039458|gb|BC004808|gb|BC057690|ens|ENSMUST00000189347	mm|chr1:52212046-52212105	0	NA	2626	GGAAAGTTTGTAACTAGTCCTGGTGTCAATGCTTACTGGCATTTTATTGCCATGAGATAA	943	0	A_65_P09765	Stat1	AK039458	gb|Mus musculus adult male spinal cord cDNA, RIKEN full-length enriched library, clone:A330045H06 product:signal transducer and activator of transcription 1, full insert sequence. [AK039458]	1.16593	0.0190414	0.669168	0.0878572	9.57108	2	0	0	0	1.09043	1.03494	1.29753	1.18015	1.17334	1.14429	0.577501	0.677361	0.752641	0.860857	1.19848	1.01247
449	DATA	999	7	15	ref|NM_173350|ref|NM_133885|ref|NM_001134791|ens|ENSMUST00000162787	mm|chr4:108739526-108738791	0	NA	1330	CCGCCCATTTCAGCCTTTTATGCTGAGTGTTTTAACAAGAAGATACAATTCAATGCTCAT	976	0	A_52_P194763	Osbpl9	NM_173350	ref|Mus musculus oxysterol binding protein-like 9 (Osbpl9), transcript variant b, mRNA [NM_173350]	0.772757	0.0981323	1.23028	0.165878	4.11171	3	0	0	0	1.35468	0.771427	0.945648	0.760699	0.876361	0.68121	1.39004	1.24191	1.0589	0.926534	0.947559	1.04504
451	DATA	1001	7	17	ref|NM_008672|ref|NM_001285490|ref|NM_001285489|ens|ENSMUST00000072727	mm|chr7:150700275-150700216	0	NA	1521	TGCCTGAAGATCACTTGGGGTGGACCGAGGTTGTGCCTGGGATTGACAGAGCCTGTGATT	980	0	A_52_P339054	Nap1l4	NM_008672	ref|Mus musculus nucleosome assembly protein 1-like 4 (Nap1l4), transcript variant 2, mRNA [NM_008672]	0.808582	0.15083	1.05782	0.0431224	2.75188	2	0	0	0	1.3539	1.24169	0.883597	0.635353	0.910804	0.879587	1.04503	1.10589	1.02254	0.846954	1.01405	1.0606
466	DATA	1036	7	52	ref|NM_148917|ref|NM_130881|ens|ENSMUST00000081204|ens|ENSMUST00000183940	mm|chr4:122975265-122975324	0	NA	2118	CACCATGCCAAGAAAGAAGCTGCCCAGAAGGTGGGCACTGTTGCTGCTGCTACCTCTTAG	1049	0	A_55_P1953093	Pabpc4	NM_148917	ref|Mus musculus poly(A) binding protein, cytoplasmic 4 (Pabpc4), transcript variant 2, mRNA [NM_148917]	1.09178	0.0398184	0.89794	0.0845475	3.59254	2	0	0	0	1.02528	1.29192	0.932179	1.1368	1.0612	1.07734	0.995544	0.850988	0.847288	0.922358	0.966552	0.892559
472	DATA	1064	7	80	ref|NM_001033135|ens|ENSMUST00000062525|ref|XM_006496226|ref|XM_011238568	mm|chr1:39608235-39608176	0	NA	2339	ACATACTTTGAAGAGCAAGGAGTCCATTGTTGTTGATTCTAAACTTGTGTTGTATGTCTA	1104	0	A_51_P186161	Rnf149	NM_001033135	ref|Mus musculus ring finger protein 149 (Rnf149), mRNA [NM_001033135]	0.780784	0.105975	1.38198	0.271465	3.57322	2	0	0	0	0.763623	0.815822	1.14465	0.68174	0.892543	0.768069	1.42572	1.0913	1.62892	0.92108	0.955067	0.911472
474	DATA	1074	7	90	ref|NM_175173|ens|ENSMUST00000170386|ref|XM_011246617|ref|XM_006524931	mm|chr17:15038869-15038810	0	NA	1813	AGATGCTTTTCCCAAGCCAGTAACATCTGCACAGTTCTACTACATGGACACCTTCATACT	1123	0	A_52_P485218	Wdr27	NM_175173	ref|Mus musculus WD repeat domain 27 (Wdr27), mRNA [NM_175173]	0.296878	0.512895	0.000758094	0	1	2	0	0	0	6.56004	1.86744	2.67734	0.889118	0.000758094	0.000758094	0.000758094	0.000758094	0.000758094	0.000758094	0.000758094	0.000758094
476	DATA	1080	7	96	gb|AK172155|riken|F830048N08|nap|NAP036505-1	mm|chr13:38307117-38307176	0	NA	1072	CAACATGAGCATTCCTGTAATAGTGGTGCTCTCAGTTCTCACCGGGAAGACTTGTTCTAA	1134	0	A_65_P12860	Snrnp48	AK172155	gb|Mus musculus activated spleen cDNA, RIKEN full-length enriched library, clone:F830048N08 product:hypothetical protein, full insert sequence. [AK172155]	1.11	0.0469224	0.544117	0.209305	4.56943	2	0	0	0	1.23386	1.43433	1.25334	1.16101	1.10031	1.06868	0.364821	0.774115	0.493415	0.934497	1.02938	1.15223
480	DATA	1098	7	114	ref|NM_181415|ens|ENSMUST00000077282|ref|XM_006527052|ref|XM_006527051	mm|chr19:57789122-57789181	0	NA	3400	TGAGCAGTGTAAGAATCTCACCACTGGGCGACAGTGTCAGGAATGCATGCCAGGGTACTA	1170	0	A_52_P526537	Atrnl1	NM_181415	ref|Mus musculus attractin like 1 (Atrnl1), mRNA [NM_181415]	1.09052	0.212073	0.636267	0.152797	3.01008	3	0	0	0	0.9752	1.45443	1.96553	1.26776	0.855563	1.14824	0.473276	0.776264	0.659263	0.728363	0.810298	0.885816
482	DATA	1102	7	118	ens|ENSMUST00000184196|gb|AK169800|gb|AK143246|gb|AK053559	mm|chr9:71791287-71791228	0	NA	1157	ATTTTTGCTAATGGTCATCTTTTTCACTGTTTTCTCATGGAATTCTGAATTTAGCCCCGC	1177	0	A_52_P859153	Tcf12	ENSMUST00000184196	ens|transcription factor 12 [Source:MGI Symbol;Acc:MGI:101877] [ENSMUST00000184196]	1.04832	0.11926	0.632984	0.295081	2.26029	2	0	0	0	1.17086	1.68811	1.14664	1.17333	1.03583	0.935793	0.292267	0.805922	0.800763	0.907531	1.0466	0.996355
484	DATA	1108	7	124	ref|NM_133979|ref|NM_001271873|ens|ENSMUST00000042546|ref|XM_011242929	mm|chr9:122085071-122085012	0	NA	2573	TTCTGTATGGTGTTATGTTGACACTTTGCAACTGAGCTATTAAAGGCAGCCCTTGGCTCC	1189	0	A_55_P2912540	Ano10	NM_133979	ref|Mus musculus anoctamin 10 (Ano10), transcript variant 1, mRNA [NM_133979]	0.779649	0.0334836	1.05308	0.0627907	6.65523	3	0	0	0	1.17788	1.17825	0.834208	0.795313	0.802429	0.741204	0.995307	1.04402	1.1199	1.32315	1.01801	0.970338
487	Mean	1115	7	131	gb|M60419|gb|BC049977|gb|BC013620|gb|BC029747	mm|chr4:118950878-118950819	0	NA	1214	CCGCTGACCAGATAACATTAGAACTATCTGCATTATCTATGCAGAATGGGGTTTTTATTA	1203	0	A_66_P117605	Ybx1	M60419	gb|Mouse Y-box binding protein 1/DNA binding protein B mRNA, complete cds. [M60419]	0.955389	0.0213442	1.0758	0.0407476	4.53376	3	0	0	0	1.0414	1.1066	0.935753	0.945076	0.979931	0.94116	1.0315	1.08419	1.11169	1.01948	0.935865	0.867346
489	Mean	1117	7	133	ref|NM_011986|ens|ENSMUST00000030637	mm|chr4:126421054-126420995	0	NA	3640	CAAGTTCAAAGCTGTGCACATGTGGACACTCAATAAATGTTTATTGGTGATGAGAAGCCT	1207	0	A_55_P1998545	Ncdn	NM_011986	ref|Mus musculus neurochondrin (Ncdn), mRNA [NM_011986]	1.02564	0.0503828	0.850733	0.205742	1.4302	2	0	0	0	1.19364	0.925399	0.852976	1.01226	0.983296	1.08136	0.96435	0.974612	0.613236	1.15062	1.10903	1.13921
490	DATA	1118	7	134	gb|AK160440|tc|TC1652796|tc|TC1767878|riken|1810009N12	mm|chr1:196937303-196925006	0	NA	1082	CATTTGGATGATTCTGAAGTATAAAAAACGACCAAGATTTTAAACTCTCATCTCCTCCTC	1209	0	A_65_P14021	Cr1l	AK160440	gb|Mus musculus 10 day old male pancreas cDNA, RIKEN full-length enriched library, clone:1810009N12 product:complement receptor related protein, full insert sequence. [AK160440]	0.546504	0.0889891	1.58521	0.18335	8.82751	2	0	0	0	1.48299	1.54703	0.466851	0.483992	0.507132	0.648388	1.58848	1.40024	1.7669	0.724196	0.522014	0.86179
493	DATA	1124	7	140	ref|NM_009829|ens|ENSMUST00000000188|ref|XM_006505459|ref|XM_006505460	mm|chr6:127080327-127080268	0	NA	1170	AGGCGTGTTCGTCATTTGCTAGCCCCTTCTTTCTCTAGTTATGTCTTGTTCTTTGTGTTT	1220	0	A_55_P2917114	Ccnd2	NM_009829	ref|Mus musculus cyclin D2 (Ccnd2), mRNA [NM_009829]	1.05854	0.0413264	0.827307	0.0376951	7.16025	3	0	0	0	1.8336	0.799756	0.934058	1.10626	1.03516	1.03421	0.868939	0.81749	0.795491	1.10594	0.876033	0.79306
496	DATA	1128	7	144	ref|NM_183171|ens|ENSMUST00000163816|ens|ENSMUST00000159137|ens|ENSMUST00000034630	mm|chr9:36683909-36686171	0	NA	1171	AGAAGGTGCCTACTTTGCTAACGGACTACATTTTAAAAGTGCTTTGTCCAACCTAACCTC	1228	0	A_66_P136787	Fez1	NM_183171	ref|Mus musculus fasciculation and elongation protein zeta 1 (zygin I) (Fez1), mRNA [NM_183171]	0.768672	0.159514	1.34572	0.159688	4.42816	3	0	0	0	0.281044	1.31211	1.31868	0.699939	0.95103	0.655047	1.31211	1.51954	1.20551	0.861535	1.05388	0.829562
498	DATA	1133	7	149	ens|ENSMUST00000187573|gb|AK054559|tc|TC1597057|riken|E530017N07	mm|chr9:105581582-105581641	0	NA	4860	ACATTATGCAAAGTATTTTGAACATACACACACCTCCCTTCTCCCTGTCCACTCCCAACA	1238	0	A_66_P106281	Pik3r4	ENSMUST00000187573	ens|phosphatidylinositol 3 kinase, regulatory subunit, polypeptide 4, p150 [Source:MGI Symbol;Acc:MGI:1922919] [ENSMUST00000187573]	0.959136	0.0219954	1.08448	0.013164	8.46972	3	0	0	0	1.09468	1.21034	0.667017	0.956651	0.982268	0.938489	1.09009	1.09392	1.06945	0.927592	0.981886	0.987621
500	DATA	1138	7	154	ref|NM_001145960|ref|NM_020258|ens|ENSMUST00000161114|ens|ENSMUST00000115068	mm|chr9:37037960-37037901	0	NA	3209	GATGTTGTGTCAGTCAGTGTGTTAGCTAGATACACTGGCCTCAGCAATAAAATATAAAGC	1248	0	A_55_P2350617	Slc37a2	NM_001145960	ref|Mus musculus solute carrier family 37 (glycerol-3-phosphate transporter), member 2 (Slc37a2), transcript variant 1, mRNA [NM_001145960]	1.30492	0.51766	0.344844	0.368477	2.61706	3	0	0	0	0.865041	1.3759	1.57998	1.01931	0.992992	1.90247	0.000322226	0.733332	0.300878	1.09584	1.28756	0.846379
511	DATA	1160	8	12	ref|NM_001033262|gb|AK158026|gb|BC019560|ens|ENSMUST00000040307	mm|chr10:126493166-126493107	0	NA	1937	ACTTCCCCCTGCTCCGCCCCCCACTGCATGGGGGAAGGGCATAAAGAATCATTTATATGC	971	0	A_55_P2011922	9-Mar	NM_001033262	ref|Mus musculus membrane-associated ring finger (C3HC4) 9 (March9), mRNA [NM_001033262]	0.812538	0.147669	1.19907	0.1451	3.23381	3	0	0	0	0.893061	1.52792	0.938551	0.735284	0.719521	0.982809	1.23562	1.03918	1.32239	0.846339	0.834735	0.924586
521	DATA	1173	8	25	gb|AK041267|gb|BB226054|riken|A530095I10	mm|chr7:140944662-140944721	0	NA	676	TGTCAGCAATGACTACCAGCCTTAGAAACCATCTGGAAAAATAAAATTGTTAATGGAACT	997	0	A_55_P2730621	AK041267	AK041267	gb|Mus musculus adult male aorta and vein cDNA, RIKEN full-length enriched library, clone:A530095I10 product:unclassifiable, full insert sequence. [AK041267]	1.30796	0.337269	0.804377	0.363716	1.75843	3	0	0	0	0.99469	0.520419	0.72598	1.10034	1.12641	1.69711	1.03873	0.989023	0.385376	1.09654	1.15758	1.16779
530	DATA	1206	8	58	gb|AF099016|gb|AF099020|gb|AF099019|tc|TC1586959	mm|chr7:30041401-30041342	0	NA	1340	CTGAAAGAATGTGTTTAATAAAGTGGGCCTTTTAAAATGCTAAAATTATGTCGCGTGGTG	1061	0	A_51_P497350	Spint2	AF099016	gb|Mus musculus hepatocyte growth factor activator inhibitor type 2 (Hai2) mRNA, complete cds. [AF099016]	0.634206	0.127488	1.20599	0.402491	2.34572	2	0	0	0	1.97215	0.776192	0.569778	0.59558	0.530497	0.776539	1.60306	1.21662	0.798291	1.13504	0.979135	1.04711
536	DATA	1228	8	80	ref|NM_177846|ens|ENSMUST00000110674|gb|AK084642|gb|AK054392	mm|chr2:120964319-120964260	0	NA	2115	ACACAGTGGCATTAGACCTTTTTTCCTTACGTTCAGGGCAATAAAGAATGGACTTGATAT	1105	0	A_55_P2905362	Lcmt2	NM_177846	ref|Mus musculus leucine carboxyl methyltransferase 2 (Lcmt2), mRNA [NM_177846]	0.847696	0.168742	1.23932	0.289066	2.02653	3	0	0	0	0.981137	1.14108	0.744724	0.876382	1.00026	0.666449	1.57233	1.05316	1.09246	1.02997	0.922246	0.91981
552	DATA	1261	8	113	ref|NM_029749|ens|ENSMUST00000141396|ens|ENSMUST00000053287|ref|XM_006504754	mm|chr5:144475561-144475502	0	NA	3701	AGGACACGCTAGAGGAGCCAAGGGTGAAGAAGCACAAAAAGTCTAAAAAGAAAAAGAAGT	1169	0	A_51_P115749	Usp42	NM_029749	ref|Mus musculus ubiquitin specific peptidase 42 (Usp42), mRNA [NM_029749]	1.14841	0.148605	0.732497	0.0541105	4.55502	2	0	0	0	0.944266	1.15849	1.4856	1.30654	1.12703	1.01165	0.768531	0.758686	0.670275	0.955262	0.937618	0.876056
558	DATA	1276	8	128	ref|NM_008248|ens|ENSMUST00000020504|gb|AK198095|gb|AK012433	mm|chr11:54683858-54683917	0	NA	435	CAGGTTGGGGATAAAGTGTCCTTCTCTAGATAGTTGGCAAGCTCCAGTAAGATAAATGGC	1198	0	A_51_P192860	Hint1	NM_008248	ref|Mus musculus histidine triad nucleotide binding protein 1 (Hint1), mRNA [NM_008248]	0.957509	0.0973092	1.0655	0.00552967	1.91917	2	0	0	0	1.2082	0.947251	0.883643	0.863165	0.951827	1.05753	1.05914	1.06829	1.06909	0.985461	0.97997	0.92643
562	DATA	1281	8	133	gb|AK006576|gb|AK046652|tc|TC1638837|riken|1700031C06	mm|chr14:70700522-70700581	0	NA	313	CACGGCCAACATCCTTTTGACAACACCAGCAAACGTGGAGCGATTTGGTGCAAATTAAAA	1208	0	A_52_P142327	1700031C06Rik	AK006576	gb|Mus musculus adult male testis cDNA, RIKEN full-length enriched library, clone:1700031C06 product:inferred: protein phosphatase 3, catalytic subunit, gamma isoform, full insert sequence. [AK006576]	0.776957	0.150177	1.26808	0.317866	2.41967	2	0	0	0	1.14569	1.39968	0.85445	0.728511	0.945377	0.656982	0.957129	1.25467	1.59244	0.817445	0.733147	0.914472
563	DATA	1282	8	134	ref|NM_001033343|ens|ENSMUST00000111985|ens|ENSMUST00000063632|gb|AK158017	mm|chr19:44591948-44591889	0	NA	3421	GAAGTTGCCCGATGTGTGGATGCCGGAAGCTTTGAGCAGGGCCTCGCGGTGCATGCGCAG	1210	0	A_66_P105958	Sec31b	NM_001033343	ref|Mus musculus Sec31 homolog B (S. cerevisiae) (Sec31b), mRNA [NM_001033343]	0.491855	0.127184	1.50204	0.646285	2.65635	2	0	0	0	1.48959	1.45568	1.30852	0.635017	0.391915	0.448635	0.80481	2.08106	1.62023	0.632943	0.500109	0.631479
569	DATA	1291	8	143	ref|NM_026513|ens|ENSMUST00000055316|ens|ENSMUST00000154271|ens|ENSMUST00000034391	mm|chr8:109570190-109570179	0	NA	863	CTGACAGAATACGATTACAGCAGGACTACAAATGTACCATTAAAGGAGGCTATTTCCTGA	1227	0	A_52_P172145	Pdf	NM_026513	ref|Mus musculus peptide deformylase (mitochondrial) (Pdf), mRNA [NM_026513]	0.951524	0.0885996	1.11041	0.0744699	2.37774	3	0	0	0	0.562801	1.04439	0.926572	1.0047	1.00063	0.849245	1.16363	1.14229	1.02531	1.07981	1.04338	1.15724
571	DATA	1297	8	149	ref|NM_001101560|ens|ENSMUST00000168560|nap|NAP026485-1	mm|chr17:3532619-3532678	0	NA	65	CGCTGCCACTCTGCTGCCAAACTGGAAGGTTAATGCATACGCAGGACCCAACATTGTAAC	1239	0	A_66_P129593	Cldn20	NM_001101560	ref|Mus musculus claudin 20 (Cldn20), mRNA [NM_001101560]	0.808882	0.0105331	0.989082	0.196496	1.58613	2	0	0	0	1.37742	1.44381	0.755598	0.810152	0.797772	0.818723	0.888288	1.21552	0.863437	0.958034	1.16002	0.911234
573	DATA	1303	8	155	ref|NM_139152|ens|ENSMUST00000151330|ens|ENSMUST00000154228|ens|ENSMUST00000097656	mm|chr1:91851061-91851002	0	NA	1120	CACAGGTGCCTGAAGTCATTGAAGTTCTGTTCAACTCCTACACTCAGCTCCCAGTGTCTG	1251	0	A_51_P501998	Asb18	NM_139152	ref|Mus musculus ankyrin repeat and SOCS box-containing 18 (Asb18), mRNA [NM_139152]	0.819527	0.2761	1.53721	0.34085	2.83385	3	0	0	0	0.801451	0.813982	0.68673	0.544554	0.817286	1.09674	1.26068	1.91801	1.43293	0.860805	0.94488	0.821957
576	DATA	1312	8	164	ref|NM_029098|ens|ENSMUST00000109127|ens|ENSMUST00000023736|ref|XM_011245758	mm|chr15:98734411-98734352	0	NA	2107	GAGGAGGCGGCTGCACCCACGAGCAATAAAATTGATCCCAGGGTTTTCTTGGTTCTTTTG	1269	0	A_55_P2085641	Lmbr1l	NM_029098	ref|Mus musculus limb region 1 like (Lmbr1l), mRNA [NM_029098]	1.14163	0.0939348	0.845938	0.151052	2.87925	3	0	0	0	1.29915	1.09204	1.28393	1.12987	1.24089	1.05413	0.69837	0.839196	1.00025	0.859343	0.836454	0.666382
581	DATA	1329	9	17	ens|ENSMUST00000185570|gb|AK153775|riken|A630084N11	mm|chr1:140068616-140068557	0	NA	3150	AATCCTTCTAAATGGGAAAGCCCTCTTCCTATGTGCAGTCATCCACATGCTCCACAGATA	1302	0	A_55_P2716281	Ptprc	ENSMUST00000185570	ens|protein tyrosine phosphatase, receptor type, C [Source:MGI Symbol;Acc:MGI:97810] [ENSMUST00000185570]	1.17051	0.193405	0.574767	0.219131	3.53042	3	0	0	0	1.19571	0.967049	1.27282	0.947181	1.28186	1.28248	0.327944	0.649938	0.746418	0.721218	1.37755	1.22983
583	DATA	1335	9	23	ref|NM_030060|ens|ENSMUST00000191621|ens|ENSMUST00000027943|ens|ENSMUST00000193771	mm|chr1:192932528-192932587	0	NA	417	CTCCTTTGTCCGGCTCGGAACCTTGGTTTGCACACTCAGGAGTTTCCCTACACACCTGTG	1314	0	A_51_P419286	Batf3	NM_030060	ref|Mus musculus basic leucine zipper transcription factor, ATF-like 3 (Batf3), mRNA [NM_030060]	1.23974	0.238834	0.253837	0.438764	3.41833	3	0	0	0	0.6868	1.37274	0.938857	1.11034	1.09354	1.51536	0.000517039	0.760478	0.000517039	1.58214	1.34559	1.59313
591	DATA	1349	9	37	gb|AK020764|gb|DT902180|gb|AA254104|tc|TC1673039	mm|chr11:87570708-87570767	0	NA	204	AAGGGAGCCGGATGGATGGGTAAGGGTCACGGGGCCCTCAACACTAATAAAGAATGGACT	1341	0	A_66_P138645	Mir142hg	AK020764	gb|Mus musculus 0 day neonate thymus cDNA, RIKEN full-length enriched library, clone:A430104N18 product:unclassifiable, full insert sequence. [AK020764]	1.23544	0.201225	0.549572	0.064314	5.6234	2	0	0	0	0.748611	1.13801	1.517	1.27065	1.01894	1.41674	0.547573	0.48628	0.614862	0.85211	1.17908	1.21015
594	Mean	1358	9	46	ens|ENSMUST00000119317|ens|ENSMUST00000116438|nap|NAP061238-1	mm|chrX:133634534-133634593	0	NA	479	AAAGCATAGCAGAGCAACGTGGAACACAAGGTCGGAACTTTTTCTGGTGTGTACAAGAAG	1358	0	A_55_P2083566	ENSMUST00000119317	ENSMUST00000119317	ens|predicted gene 8019 [Source:MGI Symbol;Acc:MGI:3645628] [ENSMUST00000119317]	0.908462	0.0472554	1.07719	0.0995067	2.65304	2	0	0	0	1.03537	0.994375	0.872158	0.922007	0.947466	0.855913	1.16645	0.969903	1.09523	1.03642	1.02432	1.0804
599	DATA	1369	9	57	ref|NM_177235|ens|ENSMUST00000062289|ref|XM_011238536|gb|AK044633	mm|chr1:33909458-33909399	0	NA	1730	TGCTAAACTGCTTAATTTTGACCTGTTTATTTCCACTGTAGCAGAAGGAAAATTAACTGG	1380	0	A_52_P629625	Bend6	NM_177235	ref|Mus musculus BEN domain containing 6 (Bend6), mRNA [NM_177235]	0.400768	0.361521	2.03701	1.55391	1.77638	2	0	0	0	0.531116	1.32501	1.00378	0.498826	0.703145	0.000334035	0.822005	1.50107	3.78796	0.522487	0.796953	0.507316
603	DATA	1378	9	66	ref|NM_172462|ens|ENSMUST00000049778|gb|AK032872|gb|BC094590	mm|chr5:130160849-130160790	0	NA	3536	GTGTATGTGATATTTTAATCCACCCTTTTTGCACTTAACCCAGAAATTACAAAGGATGTG	1398	0	A_52_P587948	Zfp11	NM_172462	ref|Mus musculus zinc finger protein 11 (Zfp11), mRNA [NM_172462]	0.682705	0.0626453	1.40313	0.674203	1.84286	2	0	0	0	1.37707	0.578144	0.945385	0.613765	0.698206	0.736145	0.926542	2.17453	1.10832	0.896161	0.933343	1.01239
607	DATA	1388	9	76	ref|NM_029887|ref|NM_001110201|ens|ENSMUST00000142519|ens|ENSMUST00000032809	mm|chr7:30030780-30030839	0	NA	693	CTGTCAACACCGACCTCACCACCATTGACCTGGTGGCCTTCTTGGGCTACAAATATGTGG	1418	0	A_55_P2113774	Yif1b	NM_029887	ref|Mus musculus Yip1 interacting factor homolog B (S. cerevisiae) (Yif1b), transcript variant 1, mRNA [NM_029887]	0.931665	0.11467	1.1185	0.0953518	2.16995	3	0	0	0	1.04623	1.16829	0.800328	0.837117	0.89866	1.05922	1.06708	1.0599	1.22853	0.921225	0.886625	1.02681
611	DATA	1398	9	86	ref|NM_026056|ens|ENSMUST00000021802|ref|XM_006516946|gb|AK049813	mm|chr13:46744654-46744713	0	NA	2661	GTTTTCTAGTCTTGATAGTACACAGACTTCCAGGCAAGCAACAACACTCTTCGTGTCTCT	1437	0	A_66_P122805	Cap2	NM_026056	ref|Mus musculus CAP, adenylate cyclase-associated protein, 2 (yeast) (Cap2), mRNA [NM_026056]	0.75512	0.263867	1.2992	0.240911	2.6375	3	0	0	0	1.05361	1.10442	0.926264	0.744108	1.02432	0.496932	1.15552	1.16475	1.57733	0.870658	0.793645	1.08843
612	DATA	1402	9	90	ref|NM_024272|ref|NM_024186|ens|ENSMUST00000042122|ens|ENSMUST00000004094	mm|chr13:91840709-91840768	0	NA	1584	GCTCCTGCCCTTCCCCAACTATTTTGTGCTGTGTACATCACTGCTTTATATAAGTTATTT	1445	0	A_55_P2155041	Ssbp2	NM_024272	ref|Mus musculus single-stranded DNA binding protein 2 (Ssbp2), transcript variant 2, mRNA [NM_024272]	0.797324	0.184064	1.29593	0.140031	3.73414	3	0	0	0	0.962795	0.867802	0.988228	0.643497	0.747223	1.00125	1.23368	1.19782	1.4563	0.984398	0.854626	1.06238
614	DATA	1407	9	95	gb|AK040447|gb|BB210360|riken|A430096P05	mm|chr8:130884009-130884068	0	NA	857	GTAAACCGTCTGTGATCAGTCTGAAGTATGAATGAAAGTCGCACTGTCAATAAAGGCTTT	1455	0	A_52_P174942	Nrp1	AK040447	gb|Mus musculus 0 day neonate thymus cDNA, RIKEN full-length enriched library, clone:A430096P05 product:neuropilin, full insert sequence. [AK040447]	0.791696	0.147498	1.10569	0.171928	2.40086	3	0	0	0	1.42145	1.11202	1.10245	0.665745	0.755383	0.953958	1.03227	0.982668	1.30214	0.773885	0.942953	0.955075
620	DATA	1417	9	105	ref|NM_001289926|ens|ENSMUST00000091560|gb|AK141931|gb|BC048855	mm|chr13:63400842-63400901	0	NA	3421	GAAATTTTACATCAATCACTGTGTTACTCTGTTGTTCTCTATGATTACCAATTAATGAAT	1475	0	A_52_P589169	2010111I01Rik	NM_001289926	ref|Mus musculus RIKEN cDNA 2010111I01 gene (2010111I01Rik), transcript variant 2, mRNA [NM_001289926]	1.07309	0.141963	0.883625	0.0174814	2.29427	2	0	0	0	1.05552	1.1615	1.0441	0.955716	1.03267	1.23088	0.903473	0.870518	0.876884	0.897669	0.99251	0.97856
622	DATA	1426	9	114	gb|AI450270	mm|chr17:80909787-80909728	0	NA	95	CCCCTGCAAATGGAGTTTGTGACAGAGAGTGGTGAGCCTCCCTGTGGTAAGGGAACCCAA	1492	0	A_66_P101053	AI450270	AI450270	gb|mt95f04.x1 Soares mouse 3NbMS Mus musculus cDNA clone IMAGE:637663 3'. [AI450270]	1.01048	0.144934	0.619352	0.310429	1.97742	2	0	0	0	1.05036	1.82929	1.52597	0.91162	1.17686	0.94297	0.837095	0.757071	0.263889	1.13162	0.716096	0.85717
626	DATA	1435	9	123	ref|NR_002839|gb|AF022079|tc|NP1217892	mm|chr6:6814542-6814483	0	NA	608	CTGGACAACGGAGAGCTATCAACCCCAGGCCCTCTGCTTCACTTCCAAGAACAAAGGAGC	1509	0	A_51_P236738	Dlx6os2	NR_002839	ref|Mus musculus distal-less homeobox 6, opposite strand 2 (Dlx6os2), antisense RNA [NR_002839]	0.712745	0.0979869	1.89334	0.878257	2.31394	2	0	0	0	0.778497	0.622884	0.635936	0.759208	0.60017	0.778857	2.0901	2.65652	0.933389	0.712589	0.720449	0.711399
632	DATA	1445	9	133	ref|NM_147075|ens|ENSMUST00000098172|gb|BC110473|gb|BC110472	mm|chr7:111766660-111766719	0	NA	489	CTACTCATGCTTCCATGTCCCTTCCTCATTGGTCGTCTGAGCTTCTGCCAAAGCCACGTG	1528	0	A_51_P351828	Olfr656	NM_147075	ref|Mus musculus olfactory receptor 656 (Olfr656), mRNA [NM_147075]	0.508803	0.0956714	1.29135	0.176429	6.75348	3	0	0	0	1.53137	1.70549	0.253294	0.398345	0.562544	0.565521	1.21091	1.49367	1.16949	1.03257	1.06754	1.00926
643	DATA	1474	9	162	ref|NM_134135|ens|ENSMUST00000117276|ens|ENSMUST00000059551|ens|ENSMUST00000168076	mm|chr10:80491344-80491285	0	NA	3402	CAGCCAGGGTTGCAAGTGGGCCCTTTTGCAAAATAAATAAACAAGTGAAGATTTAAACTA	1585	0	A_55_P2020143	Slc39a3	NM_134135	ref|Mus musculus solute carrier family 39 (zinc transporter), member 3 (Slc39a3), mRNA [NM_134135]	1.1798	0.202134	0.881956	0.131882	2.13749	3	0	0	0	0.948106	0.939392	1.15357	1.01887	1.11388	1.40667	1.01527	0.879051	0.751551	0.9536	0.937213	0.882841
649	DATA	1488	10	12	ref|NM_030013|ens|ENSMUST00000060608|ens|ENSMUST00000148443|ref|XM_006496328	mm|chr1:60444156-60444215	0	NA	1425	TTAGGTAAATGAAGGGAAATGCCCAGTTAGAGTATGTGCTGAGACCTTTTATAAACCCAG	1293	0	A_51_P370470	Cyp20a1	NM_030013	ref|Mus musculus cytochrome P450, family 20, subfamily a, polypeptide 1 (Cyp20a1), mRNA [NM_030013]	0.714019	0.0811917	1.15921	0.315157	2.36933	2	0	0	0	1.07337	1.4091	1.06366	0.792202	0.719735	0.630121	0.797482	1.37455	1.3056	0.734269	0.969018	1.1309
654	DATA	1499	10	23	ref|NM_026572|ref|NR_027860|ens|ENSMUST00000040484|ref|XM_006543036	mm|chr8:119505931-119505872	0	NA	1133	TCCCACCGTGAAGCACCGGCTTTGCAACACTGCGAAACAAATAAAACATTCATCCTCTTT	1315	0	A_66_P109800	Gcsh	NM_026572	ref|Mus musculus glycine cleavage system protein H (aminomethyl carrier) (Gcsh), mRNA [NM_026572]	0.912652	0.0368265	1.11251	0.0882178	3.62104	2	0	0	0	1.00846	0.910131	0.889441	0.87765	0.951066	0.909241	1.12281	1.01959	1.19512	1.06341	1.04261	1.01047
657	DATA	1510	10	34	ref|NM_001109657|ref|NM_001277079|ref|NM_008088|ref|NM_001277080	mm|chr11:67502368-67502427	0	NA	6978	CCCCCACCCCATGATAGCATCTGTGTGTATTAATTCTGAAGAATTAAATGTTTAAATTAG	1336	0	A_55_P2749695	Gas7	NM_001109657	ref|Mus musculus growth arrest specific 7 (Gas7), transcript variant 2, mRNA [NM_001109657]	0.822285	0.11899	1.28227	0.105431	5.01148	3	0	0	0	0.938672	1.05489	0.899693	0.752117	0.755066	0.959672	1.16356	1.365	1.31825	0.917888	0.857189	1.018
658	DATA	1512	10	36	ref|NM_025575|ens|ENSMUST00000072452|ref|XM_011239733|ref|XM_011239732	mm|chr2:164290348-164290407	0	NA	945	TGGAACCATGTCACATGAGCCATCATACTGTCACCAGCCTGTTATTTTAAAAAGAAAAAA	1340	0	A_55_P2742895	Sys1	NM_025575	ref|Mus musculus SYS1 Golgi-localized integral membrane protein homolog (S. cerevisiae) (Sys1), mRNA [NM_025575]	1.09231	0.0738001	0.85072	0.285021	1.42125	2	0	0	0	0.969625	0.998935	1.05828	1.04146	1.05852	1.17696	1.01767	1.01287	0.521618	1.05179	1.01215	1.08014
661	DATA	1517	10	41	ens|ENSMUST00000134867|gb|AK051283|gb|BB694565|tc|TC1644826	mm|chr5:5008981-5008922	0	NA	2991	CACAGACACTTGATATACAAAACGCTCTTTAAGATAAAATGTCCTGTGATAGTTAGAAGC	1350	0	A_52_P309211	Cdk14	ENSMUST00000134867	ens|cyclin-dependent kinase 14 [Source:MGI Symbol;Acc:MGI:894318] [ENSMUST00000134867]	1.1743	0.319855	0.776609	0.114403	2.02773	2	0	0	0	1.14242	0.986037	1.14655	1.50935	0.872193	1.14135	0.648177	0.867603	0.814047	0.683677	0.841284	1.34731
668	DATA	1532	10	56	ref|XM_011249011|ref|XM_006533306|ref|XM_006533307|gb|AK040933	mm|chr11:46784746-46784687	0	NA	9953	CCTTGCACACTCTATGCAAAACTTTTGTAAGCATTGCAATAATGCTATGAATTACAAGGA	1379	0	A_55_P2234704	Sgcd	XM_011249011	ref|PREDICTED: Mus musculus sarcoglycan, delta (dystrophin-associated glycoprotein) (Sgcd), transcript variant X3, mRNA [XM_011249011]	0.798159	0.0789544	1.31942	0.155537	5.17603	2	0	0	0	1.10139	0.599268	0.852789	0.740069	0.888056	0.766352	1.19175	1.49265	1.27386	1.03684	0.960319	1.09666
676	DATA	1551	10	75	ref|NM_001081293|ens|ENSMUST00000200428|ens|ENSMUST00000198740|ens|ENSMUST00000090791	mm|chr3:95578123-95578064	0	NA	1581	AACTTTGGTTTTGCCAAACCTGGCAAATGTGGATCTGGCAAAGATCAGTTCCATCCTTAG	1417	0	A_55_P2039205	Rprd2	NM_001081293	ref|Mus musculus regulation of nuclear pre-mRNA domain containing 2 (Rprd2), mRNA [NM_001081293]	0.705279	0.0630186	0.997108	0.274524	1.79455	2	0	0	0	2.0734	1.42504	0.925433	0.707126	0.767354	0.641357	0.847924	0.829477	1.31392	0.874757	0.854268	0.739938
678	DATA	1557	10	81	gb|AK079443|tc|TC1622727|riken|9930028G22|nap|NAP089648-1	mm|chr13:72609168-72609227	0	NA	3746	GATAATCCACCTTTTGTAAAACAATAATGGAAACTTATGGTCACGTGGCTTACATAGTTC	1428	0	A_66_P115873	AK079443	AK079443	gb|Mus musculus adult female vagina cDNA, RIKEN full-length enriched library, clone:9930028G22 product:unclassifiable, full insert sequence. [AK079443]	0.00189528	1.42579e-10	0.00189528	1.42579e-10	0	4	0	0	0	5.73956	2.50809	3.73529	0.00189529	0.00189529	0.00189529	0.00189529	0.00189529	0.00189529	0.00189529	0.00189529	0.00189529
687	DATA	1571	10	95	ens|ENSMUST00000153120	mm|chr10:61313949-61313890	0	NA	324	ATGGTCCTTAACCTCTGCTTCCTTTCACCTCCCCAGGGTACTCCAGGACCAATCGGGGTT	1456	0	A_55_P2721673	Col13a1	ENSMUST00000153120	ens|collagen, type XIII, alpha 1 [Source:MGI Symbol;Acc:MGI:1277201] [ENSMUST00000153120]	0.532934	0.158154	1.37081	0.708997	1.9978	2	0	0	0	2.07356	0.836028	1.07404	0.350785	0.612654	0.635365	1.14555	0.801811	2.16507	0.777112	0.632895	0.895125
690	DATA	1575	10	99	gb|AK033028|gb|AV352438|tc|TC1612346|riken|7030408E01	mm|chr7:108099778-108099837	0	NA	449	CCTTGCCTGGACAGTATAGCTCCTAGCTCTTGCCTGGACAGTATAGCTCCTAGCCCTTGC	1464	0	A_66_P109130	AK033028	AK033028	gb|Mus musculus 11 days embryo gonad cDNA, RIKEN full-length enriched library, clone:7030408E01 product:unclassifiable, full insert sequence. [AK033028]	0.725509	0.0117057	0.586747	0.0617737	3.82268	2	0	0	0	1.7359	3.0782	0.71204	0.712178	0.730244	0.734106	0.642739	0.597021	0.52048	0.695835	1.03765	0.803613
692	DATA	1577	10	101	ref|NM_019564|ens|ENSMUST00000006367|ens|ENSMUST00000153290|gb|AF172994	mm|chr7:138129081-138129140	0	NA	1947	TTCTGAGATGACCAAAAATGCCTCTTAGGAATCCTGGAACCCGGAGTACAGTGACTTTGA	1468	0	A_51_P225224	Htra1	NM_019564	ref|Mus musculus HtrA serine peptidase 1 (Htra1), mRNA [NM_019564]	1.2408	0.345947	0.785537	0.222994	1.91586	3	0	0	0	0.789306	0.852592	1.14	0.972245	1.11899	1.63118	0.94018	0.886514	0.529917	1.11232	0.886261	1.1405
697	DATA	1588	10	112	ens|ENSMUST00000155120|gb|BC046519|tc|TC1586667	mm|chr11:115936989-115936930	0	NA	712	TTTCCTGCTCCCATCTCTCTCCAGCACCTCAGGGTATAAGGTTTTTCTAGATAAGAGGAT	1489	0	A_55_P1976934	Unc13d	ENSMUST00000155120	ens|unc-13 homolog D (C. elegans) [Source:MGI Symbol;Acc:MGI:1917700] [ENSMUST00000155120]	0.799022	0.111185	1.25195	0.238918	2.97696	2	0	0	0	0.771067	1.31891	0.852726	0.687694	0.799308	0.910064	1.34035	0.981431	1.43407	1.00192	0.865651	1.03681
701	DATA	1598	10	122	ref|NM_028710|ref|NM_001166177|ens|ENSMUST00000106697|ens|ENSMUST00000106696	mm|chr11:109434582-109434641	0	NA	3215	GGGATTTCTTCCCAGCCCCTAAAACTTCTAAGAAACAAAATAAAAATGTAAACAACTCAC	1508	0	A_55_P2043122	Arsg	NM_028710	ref|Mus musculus arylsulfatase G (Arsg), transcript variant 1, mRNA [NM_028710]	0.616141	0.115493	1.92516	0.919801	2.44577	2	0	0	0	0.807337	0.855258	0.775287	0.52975	0.571353	0.74732	2.15413	2.70884	0.912501	0.545082	0.725979	0.667157
706	DATA	1604	10	128	gb|AK087850|gb|XR_107888|riken|E330029N23|nap|NAP119501-1	mm|chr7:35025036-35025095	0	NA	3986	CAGCATGGAGATGGCACTGGCTGTTTGCACAGCTAAGTTAACCCCCTTTAGCTTTTTATT	1520	0	A_66_P122756	Gm12758	AK087850	gb|Mus musculus 2 days pregnant adult female ovary cDNA, RIKEN full-length enriched library, clone:E330029N23 product:unclassifiable, full insert sequence. [AK087850]	0.75567	0.0321123	1.27988	0.687161	1.31989	2	0	0	0	1.25627	1.12689	0.999024	0.792204	0.742894	0.731912	0.930103	0.837983	2.07156	0.878496	0.772984	0.859668
711	DATA	1612	10	136	ref|XM_003084492|ref|XM_006543627|ref|XR_374232|ref|XR_399654	mm|chr2:30513747-30513688	0	NA	873	CACAGGCCCAGGGGCTCATGCTTGAAGGAGAAAAAGGCGACAAAAATAAATAAATAAAAG	1535	0	A_55_P2132162	Gm14486	XM_003084492	ref|PREDICTED: Mus musculus predicted gene 14486 (Gm14486), transcript variant X1, mRNA [XM_003084492]	0.227043	0.197019	0.728278	0.183062	3.22812	3	0	0	0	0.82392	0.531086	7.0827	0.356221	0.324631	0.000278116	0.587289	0.66238	0.935166	0.293946	0.000278116	0.40211
713	DATA	1617	10	141	gb|AK018993|tc|TC1644688|riken|1700127G21|nap|NAP092031-1	mm|chr19:20615781-20615840	0	NA	425	CCTGGAAGATGTTTGTCCTCACTGTTTCATTTTCAGATGGAAACAAGATTTTCCATTTAT	1545	0	A_55_P2728800	E030003E18Rik	AK018993	gb|Mus musculus adult male testis cDNA, RIKEN full-length enriched library, clone:1700127G21 product:unclassifiable, full insert sequence. [AK018993]	0.710223	0.152886	1.17569	0.172387	3.49896	3	0	0	0	1.34586	1.10176	1.01633	0.820929	0.773959	0.53578	1.06533	1.37434	1.0874	0.866173	1.0784	0.933731
724	DATA	1648	11	8	ref|XM_006504607|ref|XM_006504608|ref|XM_011240954|ref|XM_011240950	mm|chr5:137958640-137958699	0	NA	390	ACTGGAGAGGCACACTGGTCCAGCCTCCTGCCCAGCCTGTGATAAAAAACCCACGTATTC	1604	0	A_55_P2138222	Gigyf1	XM_006504607	ref|PREDICTED: Mus musculus GRB10 interacting GYF protein 1 (Gigyf1), transcript variant X3, mRNA [XM_006504607]	0.825454	0.125888	1.1521	0.24394	2.061	2	0	0	0	1.03257	1.15968	0.882339	0.860044	0.930431	0.685888	1.42827	0.966032	1.06198	1.02673	0.912922	1.05311
744	DATA	1703	11	63	ref|NM_001042438|ref|NM_009572|ens|ENSMUST00000070143|ens|ENSMUST00000110168	mm|chr15:57879474-57879415	0	NA	4314	CCTAACATGTTAAAAATTACCTTTTCGTGTAAGAATCGGGGCTTTTTAACGGTAAGTATG	1712	0	A_51_P388973	Zhx1	NM_001042438	ref|Mus musculus zinc fingers and homeoboxes 1 (Zhx1), transcript variant 2, mRNA [NM_001042438]	0.773335	0.339769	1.39869	0.167409	2.85963	2	0	0	0	1.17193	1.27347	0.823615	0.478322	0.69686	1.14482	1.4523	1.21104	1.53272	0.573891	0.636263	1.00475
753	DATA	1718	11	78	ref|NM_001100452|ens|ENSMUST00000040624|ref|XM_006523974|ref|XM_006523976	mm|chr17:46935329-46935270	0	NA	6314	GGCGTGGCTTTATTTGCTTAAATACCTTCATTTGTATAGTATGTCTCACTTGAAATTGCT	1739	0	A_55_P2806144	Gltscr1l	NM_001100452	ref|Mus musculus GLTSCR1-like (Gltscr1l), mRNA [NM_001100452]	1.05064	0.0662909	0.892827	0.1289	1.88579	2	0	0	0	1.01795	0.948512	1.11538	1.00141	1.12602	1.02449	0.749284	0.930516	0.998682	0.978959	1.03922	1.06958
755	Mean	1727	11	87	ref|XM_011251183|gb|BC025219|tc|TC1755804|tc|TC1639469	mm|chr4:145100979-145101038	0	NA	760	TCTCCTTATGGTGGCGGCCGTCTAGGGCGAATGAAGAGGAAGAATGCCAAGAAAGGCCAG	1757	0	A_55_P1961870	LOC100862444	XM_011251183	ref|PREDICTED: Mus musculus 40S ribosomal protein S9-like (LOC100862444), mRNA [XM_011251183]	0.936005	0.0224682	1.03164	0.0787497	2.02273	2	0	0	0	1.05169	1.17469	0.91448	0.911006	0.954514	0.942494	1.11539	1.02043	0.959096	1.04065	0.942906	0.972649
757	DATA	1730	11	90	ref|NM_021427|ens|ENSMUST00000051179|gb|AK141493|gb|AK140685	mm|chr7:100230092-100230151	0	NA	1702	AAGGGTCAAGAGTAAGACAGCTTTTACTGTCTCATCTCAGTTCAGCCAAGGTCAGTGTGT	1763	0	A_51_P158678	Fam181b	NM_021427	ref|Mus musculus family with sequence similarity 181, member B (Fam181b), mRNA [NM_021427]	0.652003	0.107804	1.02099	0.148015	3.4902	3	0	0	0	1.62564	1.83064	0.940036	0.692041	0.73406	0.529908	0.962203	1.18937	0.911396	0.793695	0.963184	0.827828
774	DATA	1767	11	127	ref|NM_173382|ens|ENSMUST00000058577|gb|AK034174|gb|AK038404	mm|chr3:53285151-53285210	0	NA	3795	GGTGTTTTCAACTAAAAATGTATACCCAGAACTACTTACAGATCTATAAGTAAAGGAGGC	1834	0	A_52_P258218	Proser1	NM_173382	ref|Mus musculus proline and serine rich 1 (Proser1), mRNA [NM_173382]	0.603644	0.148769	0.966444	0.159123	2.88469	3	0	0	0	3.08004	0.803921	1.1345	0.692178	0.686866	0.431888	0.893846	1.14892	0.856567	0.645034	0.731734	0.89451
775	DATA	1768	11	128	ref|NM_175307|ens|ENSMUST00000051676|gb|AK163215|gb|AK135706	mm|chr4:133043730-133043789	0	NA	2162	CCCCACTTGCTTGGTAATAGGACTCTCACTTATCGGGAAGGCGGCAGATCCCATCCCCTT	1836	0	A_51_P511250	Fam46b	NM_175307	ref|Mus musculus family with sequence similarity 46, member B (Fam46b), mRNA [NM_175307]	0.868432	0.111275	1.40734	0.253549	3.37108	2	0	0	0	1.04852	0.995576	1.00793	0.814269	0.996419	0.794607	1.63317	1.13307	1.4558	0.568218	0.764553	0.787866
784	DATA	1785	11	145	ref|NM_026145|ref|NM_001159941|ens|ENSMUST00000134532|ens|ENSMUST00000102581	mm|chr5:114814593-114814534	0	NA	2082	CAATCTCTGACAGGTTTTAAAATTTCTATTTAGCGACGGTTTGTACAGCTCGCTTTGTAC	1868	0	A_51_P338397	Kctd10	NM_026145	ref|Mus musculus potassium channel tetramerisation domain containing 10 (Kctd10), transcript variant 2, mRNA [NM_026145]	0.864363	0.0811327	1.27201	0.157108	3.99317	2	0	0	0	0.613606	1.07166	0.952154	0.771006	0.904277	0.917807	1.42705	1.11291	1.27608	0.951019	0.997288	1.00514
787	DATA	1788	11	148	ref|NM_001085503|ens|ENSMUST00000105749|nap|NAP023811-001	mm|chr4:144045685-144045626	0	NA	1141	ATATGGAAGATGGCTTCCATGGAGTGCTTAGTGCCCTTGACTATGGATTATTGAGCTTCC	1874	0	A_55_P2076876	Aadacl3	NM_001085503	ref|Mus musculus arylacetamide deacetylase-like 3 (Aadacl3), mRNA [NM_001085503]	0.000623185	0	0.867855	1.50209	1	2	0	0	0	1.28272	1.50577	6.6042	0.000623185	0.000623185	0.000623185	0.000623185	2.60232	0.000623185	0.000623185	0.000623185	0.000623185
791	DATA	1796	11	156	ref|NM_001001182|ens|ENSMUST00000153136|ens|ENSMUST00000090925|ens|ENSMUST00000112550	mm|chr2:59786195-59781080	0	NA	2698	GAATTCCTAGATAACACAGATGCAAAATTACTAAGGAAACTGCAGGCTCAAGAAATAGCC	1889	0	A_51_P295961	Baz2b	NM_001001182	ref|Mus musculus bromodomain adjacent to zinc finger domain, 2B (Baz2b), mRNA [NM_001001182]	1.07106	0.0848435	0.860555	0.0119014	4.25561	2	0	0	0	0.695229	1.31161	1.23076	1.12824	1.11136	0.973572	0.871051	0.847625	0.86299	0.98264	1.09423	0.890699
802	DATA	1817	12	13	ref|NM_009801|ens|ENSMUST00000029078|ref|XM_006530050|gb|AK002333	mm|chr3:14900206-14900265	0	NA	1225	CCTCTCATCCGTTGTGCTTACTAACAAAATGTGAAAAGCAAGACCCAGGTGTCTCATGTG	1615	0	A_51_P455647	Car2	NM_009801	ref|Mus musculus carbonic anhydrase 2 (Car2), mRNA [NM_009801]	1.46012	0.232414	0.953503	0.105856	3.43594	2	0	0	0	0.927627	0.951176	0.727726	1.50373	1.20899	1.66764	1.06686	0.936427	0.857224	0.53284	0.811206	0.808551
804	DATA	1821	12	17	ref|NM_020497|ens|ENSMUST00000150356|ens|ENSMUST00000001092|ens|ENSMUST00000156896	mm|chr8:125780379-125780438	0	NA	1140	ATGCAGTCAGCTGTGGGTCTCTGCCCAGCCTCCAGAGGACACTGTCCTCTGAGTACTGCG	1623	0	A_55_P2740188	Zfp276	NM_020497	ref|Mus musculus zinc finger protein (C2H2 type) 276 (Zfp276), mRNA [NM_020497]	1.07028	0.0529697	0.755365	0.0245406	9.34325	2	0	0	0	1.36702	0.692758	1.19752	1.00952	1.10673	1.09458	0.727338	0.76576	0.772997	0.979672	1.26391	1.0222
807	DATA	1830	12	26	ref|NM_009825|ref|NM_001285776|ref|NM_001111043|ref|NM_001111044	mm|chr7:106494030-106493971	0	NA	2254	GGGGAGGGGAAATATGAGCCTTTGTTGCTTTCAAAACGAGAACAGTTTGTACAAGTTTTT	1640	0	A_51_P287069	Serpinh1	NM_009825	ref|Mus musculus serine (or cysteine) peptidase inhibitor, clade H, member 1 (Serpinh1), transcript variant 1, mRNA [NM_009825]	1.19143	0.138506	0.882987	0.0462787	3.65834	2	0	0	0	0.851907	0.642501	1.12211	1.24779	1.29286	1.03363	0.923	0.893655	0.832306	1.11712	0.988003	1.05511
816	DATA	1843	12	39	ref|NM_001081409|ens|ENSMUST00000048188|ref|XM_006520923|ref|XM_006520922	mm|chr15:66436402-66436461	0	NA	1094	ACAAGAGGAAAAATAATCAAGGCAACTCATTTCAGGCAAAGAGAGCCCGACTTAACAAGA	1666	0	A_51_P334344	Phf20l1	NM_001081409	ref|Mus musculus PHD finger protein 20-like 1 (Phf20l1), mRNA [NM_001081409]	1.08352	0.076036	0.825225	0.116288	3.21999	3	0	0	0	1.05253	0.851046	1.07739	1.10987	1.14288	0.997819	0.909571	0.873536	0.692568	0.98927	1.19917	1.10435
821	DATA	1853	12	49	ref|NM_172417|ens|ENSMUST00000105572|ref|XM_006539211|ref|XM_006539212	mm|chr4:155595141-155595200	0	NA	3566	AGGGTTGGATATTCTCCAAGAGCCCCGGACAGGATATCCATAGAATGTAATAGCATCCTA	1685	0	A_51_P322473	Perm1	NM_172417	ref|Mus musculus PPARGC1 and ESRR induced regulator, muscle 1 (Perm1), mRNA [NM_172417]	1.05186	0.0182135	0.881961	0.161759	1.80776	2	0	0	0	1.057	1.09373	0.922199	1.07215	1.03694	1.04648	0.988618	0.961426	0.69584	1.00208	1.00939	1.11415
823	Mean	1859	12	55	ref|NM_011296|ens|ENSMUST00000119199|ens|ENSMUST00000080443|ens|ENSMUST00000077163	mm|chr17:34089202-34089041	0	NA	367	AAATTCGAGCCCATAGAGGGCTGCGCCACTTTTGTGGCCTTCTTGTCCGAGGTCAGCACA	1697	0	A_55_P2135632	Rps18	NM_011296	ref|Mus musculus ribosomal protein S18 (Rps18), mRNA [NM_011296]	1.10213	0.0814461	0.892509	0.144409	2.18995	3	0	0	0	1.2288	1.15626	0.95605	1.05522	1.19618	1.055	1.05166	0.856038	0.769831	0.892744	0.845449	0.936777
824	DATA	1862	12	58	ens|ENSMUST00000097419|ens|ENSMUST00000024636|ref|XM_006523355|ref|XM_006523356	mm|chr17:8389281-8389340	0	NA	3116	TCTGCATGTAATAAATGTCTCTTTGAACAGTGGATTAAAATGTTGGCCGGCAGTATCCTC	1703	0	A_55_P2153827	Fgfr1op	ENSMUST00000097419	ens|Fgfr1 oncogene partner [Source:MGI Symbol;Acc:MGI:1922546] [ENSMUST00000097419]	1.20429	0.310887	0.831144	0.14898	1.87475	2	0	0	0	1.06996	0.640713	0.912615	1.04659	1.00386	1.56242	0.888013	0.943314	0.662106	1.11125	1.08226	1.07691
825	DATA	1863	12	59	ref|NM_199310|ens|ENSMUST00000036470|ref|XM_011239574|gb|AK147152	mm|chr2:118844045-118843986	0	NA	1339	ATGGTTTAGTGTTTGACACAACTCTTGATTAATTCCAAACTTGCTTCTCATGGTAAGTTC	1705	0	A_52_P305182	Ccdc32	NM_199310	ref|Mus musculus coiled-coil domain containing 32 (Ccdc32), mRNA [NM_199310]	0.79097	0.0578636	1.22319	0.154133	4.54717	2	0	0	0	1.22116	0.830029	1.20049	0.808595	0.726343	0.837971	1.21768	1.07189	1.38001	0.935455	0.823392	0.946988
827	DATA	1865	12	61	ref|NM_145219|ens|ENSMUST00000047331|gb|AF515590|gb|AK087125	mm|chr14:70937619-70937678	0	NA	2668	AGCAGCAACTGGGTTCTTCACAGTGCAGTATAGCTCTCCTCACTAGAGTTTTCTTCCACG	1709	0	A_51_P356967	Lgi3	NM_145219	ref|Mus musculus leucine-rich repeat LGI family, member 3 (Lgi3), mRNA [NM_145219]	1.47078	0.28134	0.524389	0.541157	2.68757	3	0	0	0	1.12648	0.693087	0.628077	1.56292	1.15493	1.6945	1.08132	0.491327	0.000521118	0.928676	1.38596	1.2522
834	DATA	1883	12	79	ref|NM_054070|ref|NR_028260|ens|ENSMUST00000146795|ens|ENSMUST00000001520	mm|chr8:126025188-126025247	0	NA	1858	AGCAGTTCCTCTACACACGAGAGCAGCTCTTCGACCGCATGTGTATGATGCTGGGGGGTA	1742	0	A_52_P193291	Afg3l1	NM_054070	ref|Mus musculus AFG3-like AAA ATPase 1 (Afg3l1), transcript variant 1, mRNA [NM_054070]	0.90809	0.102127	1.14492	0.142815	2.33638	3	0	0	0	1.02278	1.05933	0.962615	0.814818	1.01722	0.892235	1.07659	1.30907	1.04911	0.933555	0.833775	1.02891
837	DATA	1888	12	84	ref|NM_029570|ens|ENSMUST00000196700|ens|ENSMUST00000196409|ens|ENSMUST00000029257	mm|chr3:35754748-35754807	0	NA	4413	AGTGCAAAGGGAGTTTTGCATCTCATGTCCAAGTCAGAATTAGGGCCATTTACTAGACTT	1752	0	A_51_P146505	Atp11b	NM_029570	ref|Mus musculus ATPase, class VI, type 11B (Atp11b), mRNA [NM_029570]	0.678767	0.189163	1.12435	0.257248	2.41699	3	0	0	0	1.30583	1.25724	0.72853	0.75993	0.813803	0.462566	1.16917	1.35624	0.847633	0.82346	1.07321	1.4024
838	Mean	1895	12	91	ref|NM_016844|ens|ENSMUST00000087342|gb|BC125646|gb|AK002919	mm|chr17:33960197-33960058	0	NA	191	CTCACCCTATTGGAGTCAGAAAGAGAAGCTCGAAGGTTGCGTTGATCTTGCAGCTGGGTT	1766	0	A_55_P1972841	Rps28	NM_016844	ref|Mus musculus ribosomal protein S28 (Rps28), mRNA [NM_016844]	0.917811	0.0453569	1.05637	0.0201651	4.83489	2	0	0	0	0.992181	1.10407	0.954664	0.949493	0.938086	0.865853	1.04004	1.07891	1.05016	1.00925	1.03543	0.981872
841	DATA	1902	12	98	gb|AK017987|riken|5830443J22	mm|chr9:71758427-71758368	0	NA	1035	GCTTAAACCCTAATATCACTGTCAATATATCCATCAGTAGAAAACCAATTTGTCCCTTTC	1778	0	A_55_P2199777	5830443J22Rik	AK017987	gb|Mus musculus adult male thymus cDNA, RIKEN full-length enriched library, clone:5830443J22 product:unclassifiable, full insert sequence. [AK017987]	1.3628	0.22634	0.559063	0.204721	4.56148	3	0	0	0	0.956711	1.32675	0.713079	1.1125	1.42282	1.55308	0.323558	0.6591	0.69453	0.893459	1.27881	1.06561
842	DATA	1903	12	99	ens|ENSMUST00000124348|gb|AK168693|tc|TC1618184|riken|I920045N07	mm|chr4:102816633-102816692	0	NA	1522	TTTCTACCGTTTTTAGGTGGGTTATAGAAAGACTGTGTATGAGTTCATAAACAGTGCGGC	1780	0	A_65_P03200	Mier1	ENSMUST00000124348	ens|mesoderm induction early response 1 homolog (Xenopus laevis [Source:MGI Symbol;Acc:MGI:1918398] [ENSMUST00000124348]	1.36554	0.151975	0.600341	0.292778	4.0178	3	0	0	0	1.24849	1.14471	0.569999	1.41928	1.48334	1.19399	0.400404	0.936399	0.464222	0.92436	1.1514	1.0634
852	DATA	1927	12	123	ref|NM_026850|ens|ENSMUST00000193073|ens|ENSMUST00000027247|gb|AK168509	mm|chr1:39053293-39053352	0	NA	917	TGTTGGAACTCTTTAATTAATCATGTTTCTTTAAGAGAAATTTAAGCAAGCTTGTTATGT	1827	0	A_52_P622442	Pdcl3	NM_026850	ref|Mus musculus phosducin-like 3 (Pdcl3), mRNA [NM_026850]	0.708576	0.231069	1.22429	0.301175	2.35307	3	0	0	0	1.24767	1.11378	0.992068	0.811379	0.870404	0.443946	1.37211	1.42298	0.877761	0.906306	1.02402	0.917573
856	DATA	1940	12	136	ref|NM_011908|ens|ENSMUST00000079324|ref|XM_006504832|gb|AF044222	mm|chr5:149316590-149316531	0	NA	2283	AGATTGGCGTGTAGCATTATAGACCAGTATTCCATATCAATAACTTTATCCAGCCTTTTG	1852	0	A_66_P112886	Ubl3	NM_011908	ref|Mus musculus ubiquitin-like 3 (Ubl3), mRNA [NM_011908]	0.668595	0.150306	1.26388	0.0299221	6.72768	2	0	0	0	1.62405	0.908632	0.801992	0.68671	0.809023	0.510052	1.2328	1.26634	1.29249	0.852895	0.932069	1.08295
861	DATA	1952	12	148	gb|BC023919|tc|TC1602007|nap|NAP069336-1	mm|chr8:036798099-036798158	0	NA	828	CAGAATCTATGTCACATAGTACAGAAGGGAAGGTCTGACATCAAGGCTGTCCTCTAGCTT	1875	0	A_66_P120552	BC023919	BC023919	gb|Mus musculus, clone IMAGE:5323314, mRNA. [BC023919]	0.000598387	0	0.171754	0.29645	1	2	0	0	0	3.34897	3.1712	4.25229	0.000598387	0.000598387	0.000598387	0.000598387	0.000598387	0.514064	0.000598387	0.709288	0.000598387
862	DATA	1954	12	150	gb|AK039645|tc|TC1606221|riken|A330077J02|nap|NAP080591-1	mm|chr8:27053002-27052943	0	NA	1658	TTGTGGTACCAAATGCACTGCCTTGTACTTAGCAAGTGCTAAATAAACATTTATTAAAGC	1879	0	A_66_P121304	AK039645	AK039645	gb|Mus musculus adult male spinal cord cDNA, RIKEN full-length enriched library, clone:A330077J02 product:hypothetical protein, full insert sequence. [AK039645]	1.23985	0.0930744	0.929455	0.0615047	4.81909	3	0	0	0	0.644914	0.951826	0.911104	1.15309	1.2283	1.33816	0.986153	0.938145	0.864068	0.867549	1.19891	0.917783
863	DATA	1959	12	155	ref|NM_007621|ens|ENSMUST00000149450|ens|ENSMUST00000026148|gb|D26123	mm|chr11:120592118-120592059	0	NA	294	CAATGCAGCGCTGGTTATAATGCAGCCCTTCCTGGAAGTTACCAAGGAAGCCTTTGACAG	1888	0	A_55_P2122604	Cbr2	NM_007621	ref|Mus musculus carbonyl reductase 2 (Cbr2), mRNA [NM_007621]	1.58125	0.976133	0.841808	0.0756251	1.30815	2	0	0	0	0.253947	0.760621	0.726049	1.03675	0.998818	2.70818	0.921678	0.832445	0.771299	1.06728	0.894274	1.02866
871	DATA	1973	13	5	ref|XM_006524994|gb|AK156088|gb|BB214400|riken|F830007K09	mm|chr17:85529686-85529744	0	NA	4390	GAAGTGGCTCCTGAAAAGATGGGGTAGAAGACAAATTACCTTTTCATTTATTACTTTTTG	1909	0	A_55_P2805853	Camkmt	XM_006524994	ref|PREDICTED: Mus musculus calmodulin-lysine N-methyltransferase (Camkmt), transcript variant X4, mRNA [XM_006524994]	0.82368	0.116214	1.21621	0.210199	2.83065	3	0	0	0	1.37401	0.729573	1.00114	0.75124	0.957727	0.762074	1.18511	1.02329	1.44023	0.999768	0.852139	0.92369
874	Mean	1981	13	13	ens|ENSMUST00000119616|ens|ENSMUST00000101199|ens|ENSMUST00000085163|ens|ENSMUST00000197129	mm|chr4:126818627-126818568	0	NA	105	GATGACACCAGCCGCTCTATCATCCGAAATGTCAAAGGACCTGTTCGAGAGGGTGACATG	1924	0	A_55_P1972839	ENSMUST00000119616	ENSMUST00000119616	ens|predicted gene 12943 [Source:MGI Symbol;Acc:MGI:3650497] [ENSMUST00000119616]	0.926976	0.0269717	1.05117	0.0181872	6.61265	3	0	0	0	0.941014	1.0701	0.952623	0.932911	0.897531	0.950486	1.05008	1.06988	1.03355	1.02812	1.03068	1.04301
876	DATA	1984	13	16	ref|NM_008254|ens|ENSMUST00000134135|ens|ENSMUST00000135644|ens|ENSMUST00000030432	mm|chr4:135516759-135516818	0	NA	839	GGGCATCAGGGAACTTGGCTACTGAGGACCTGGTCTACATGCTGAATGGCTTAGGGATTC	1930	0	A_55_P2917815	Hmgcl	NM_008254	ref|Mus musculus 3-hydroxy-3-methylglutaryl-Coenzyme A lyase (Hmgcl), mRNA [NM_008254]	0.890858	0.0645422	1.03263	0.0161745	3.69046	2	0	0	0	1.35902	0.974925	0.968449	0.818374	0.942108	0.912093	1.04978	1.03047	1.01764	0.925419	0.953628	1.04809
884	DATA	2004	13	36	gb|AK133468|gb|AK134264|riken|5031401G23|riken|5930418B08	mm|chr16:31090001-31090060	0	NA	2183	ATATAAGAGTGAGAGGCCCGGGCTAGAGGGAGGATTATTATTCAAGAGAGGATTACTATT	1969	0	A_55_P2042184	AK133468	AK133468	gb|Mus musculus 11 days pregnant adult female ovary and uterus cDNA, RIKEN full-length enriched library, clone:5031401G23 product:unclassifiable, full insert sequence. [AK133468]	1.21797	0.42609	0.554763	0.264803	2.28975	3	0	0	0	0.708498	1.02097	1.43858	1.70109	1.057	0.895806	0.371587	0.434325	0.858379	1.23125	1.23004	1.05248
892	DATA	2017	13	49	ref|NM_001127169|ref|XM_006528467|gb|AK003800|ens|ENSMUST00000113116	mm|chrX:132760580-132760639	0	NA	911	TCAACTGTCACCTGCCTTTGGATTTCTTAGCCAGAGGAATAAAGTGACCATTATAAAATG	1994	0	A_55_P2012011	Tceal7	NM_001127169	ref|Mus musculus transcription elongation factor A (SII)-like 7 (Tceal7), mRNA [NM_001127169]	0.533308	0.464498	1.43403	0.546999	2.17401	3	0	0	0	0.865778	1.8555	1.03388	0.852144	0.747408	0.000371845	1.98085	1.43439	0.886849	0.891343	1.0455	0.405977
904	DATA	2042	13	74	gb|AK008009|tc|TC1701585|riken|2010001H16|nap|NAP090836-1	mm|chr3:57551925-57551984	0	NA	239	GAGCCATCTCTTCAGCCCCCATAGTATCCAATGTATGCATACTTATGTATATTTTTAATA	2040	0	A_55_P2727282	Rnf13	AK008009	gb|Mus musculus adult male small intestine cDNA, RIKEN full-length enriched library, clone:2010001H16 product:unclassifiable, full insert sequence. [AK008009]	0.859502	0.0301571	1.07902	0.0555457	6.01562	3	0	0	0	0.819296	0.987484	0.801079	0.839136	0.845223	0.894146	1.07225	1.02716	1.13764	1.21812	1.25081	1.10765
910	DATA	2051	13	83	ref|XM_006526085|ref|XM_006526088|ref|XM_006526086|ref|XM_006526089	mm|chr18:68419456-68419515	0	NA	7846	GGGGGGAATAAAAGCTCCAAGCTAGTACTAATTATTCTTAATGTGCGACTCTTAATGCTG	2058	0	A_52_P244908	Ldlrad4	XM_006526085	ref|PREDICTED: Mus musculus low density lipoprotein receptor class A domain containing 4 (Ldlrad4), transcript variant X1, mRNA [XM_006526085]	0.497479	0.1835	0.988985	0.391096	1.97061	2	0	0	0	3.60247	0.589529	1.36989	0.593231	0.613298	0.285909	0.727098	0.80131	1.43855	0.56273	0.593694	0.822303
912	Mean	2056	13	88	ens|ENSMUST00000185744|ens|ENSMUST00000187749|nap|NAP026680-1|nap|NAP112548-1	mm|chr1:45659372-45659431	0	NA	357	TTGATTCTCTAGTCATTGAACGCATCCAGGTGAACAAGGCACCTAAGATGCACCTAGGAA	2067	0	A_55_P1988951	ENSMUST00000185744	ENSMUST00000185744	ens|predicted gene 8304 [Source:MGI Symbol;Acc:MGI:3646945] [ENSMUST00000185744]	0.953973	0.062581	1.06257	0.0423789	2.48858	3	0	0	0	1.04941	1.0393	0.875425	1.01471	0.957506	0.8897	1.109	1.05271	1.02598	0.929287	0.993284	1.06368
929	DATA	2095	13	127	ref|NM_001081273|ens|ENSMUST00000031837|gb|BC085280|gb|AK005467	mm|chr6:48883490-48883549	0	NA	2287	TTCAACCTCCCTGGCTTCTAGATACAGCTACAACAACATCAGCCACTGCATCCCTGGAGA	2142	0	A_51_P512061	1600015I10Rik	NM_001081273	ref|Mus musculus RIKEN cDNA 1600015I10 gene (1600015I10Rik), mRNA [NM_001081273]	0.485851	0.420743	1.21903	0.127893	2.88776	2	0	0	0	0.974467	0.962077	1.67942	0.711233	0.000430942	0.745888	1.36555	1.12979	1.16175	0.590749	1.42498	1.25368
930	DATA	2096	13	128	ref|NM_001033132|ref|NM_001168592|ens|ENSMUST00000168587|ens|ENSMUST00000100339	mm|chr14:102033590-102033531	0	NA	267	AAGAAATTGCCGCTGTAATTGAGACTGTGTGAAAACTGATTCGTTATTCTAAAGTAATGG	2144	0	A_52_P446120	Commd6	NM_001033132	ref|Mus musculus COMM domain containing 6 (Commd6), transcript variant 1, mRNA [NM_001033132]	0.806813	0.178336	1.22566	0.0232074	4.03397	2	0	0	0	1.31935	0.843025	0.796486	0.841063	0.96554	0.613835	1.19893	1.23734	1.24071	0.784711	0.956288	1.20272
931	DATA	2097	13	129	ref|NM_183308|ens|ENSMUST00000057792|ref|XM_006505122|gb|AK007350	mm|chr6:5214690-5214631	0	NA	1783	GAAAGCTCTATGTAAAGGGGCTCTTTATTGGAAAAATAAAATAAAACAACCGAATACTGT	2146	0	A_66_P114811	Pon2	NM_183308	ref|Mus musculus paraoxonase 2 (Pon2), mRNA [NM_183308]	0.88092	0.119362	1.05729	0.0602081	2.28508	2	0	0	0	1.19931	1.01121	0.980804	0.936431	0.962418	0.743912	1.03136	1.01439	1.12612	1.00273	1.0303	0.961004
934	DATA	2102	13	134	ref|NM_010685|ens|ENSMUST00000061755|gb|AK163933|gb|AK088804	mm|chrX:35772833-35772774	0	NA	3460	AAGAAACTGGTCCATGTAAGTACTTTCCATGTTTTCTCTTCAAATGTTTAAAGTGCTAGC	2155	0	A_52_P483280	Lamp2	NM_010685	ref|Mus musculus lysosomal-associated membrane protein 2 (Lamp2), transcript variant 2, mRNA [NM_010685]	0.754665	0.0239834	1.19091	0.0378473	16.8635	3	0	0	0	1.52927	1.03261	0.81862	0.760919	0.774902	0.728174	1.15669	1.23156	1.18448	0.871189	0.929599	0.98199
935	DATA	2103	13	135	ens|ENSMUST00000178604|nap|NAP103238-1|nap|NAP060127-1	mm|chr15:45810022-45809963	0	NA	1561	AGATCATGTTTGGCAAGAGGCACAAAGTCCGAGAGGCCAACAAGCTGGCAGAGAAGGGGA	2157	0	A_66_P113768	ENSMUST00000178604	ENSMUST00000178604	ens|predicted gene 5472 [Source:MGI Symbol;Acc:MGI:3648309] [ENSMUST00000178604]	0.736862	0.0915218	1.38154	0.333445	3.22929	2	0	0	0	1.4203	0.842287	0.939897	0.818957	0.753448	0.638182	1.17039	1.20828	1.76595	0.787602	0.82157	0.833141
937	DATA	2106	13	138	ref|NM_026685|ens|ENSMUST00000050389|gb|AK002365|gb|AK057630	mm|chr13:99405815-99405756	0	NA	1369	AGTGACTTATCTTAGACAACTTGGGCTGTTATCTGGTCTCCCTGGAAGCCTTTGGATCTT	2163	0	A_51_P492346	Tmem174	NM_026685	ref|Mus musculus transmembrane protein 174 (Tmem174), mRNA [NM_026685]	0.861547	0.0574228	1.25134	0.342786	1.94249	2	0	0	0	0.971137	0.715225	0.754263	0.923174	0.809545	0.851921	1.63125	0.965204	1.15755	1.09846	1.01366	1.1086
938	DATA	2109	13	141	ref|NM_172965|ens|ENSMUST00000178164|ens|ENSMUST00000025109|ref|XM_006525949	mm|chr18:31882572-31882631	0	NA	3871	AGGTTGAGAGCAGACAACACTAACTGCTCTGGGATCCTGTTCTAGAGGACATTTCAGTTA	2169	0	A_51_P141521	Sap130	NM_172965	ref|Mus musculus Sin3A associated protein (Sap130), mRNA [NM_172965]	0.999074	0.030825	0.937087	0.0384457	2.1788	3	0	0	0	1.67654	0.909824	0.898391	0.985296	0.977541	1.03438	0.96387	0.893034	0.954356	0.906306	0.807648	0.992811
939	DATA	2111	13	143	ens|ENSMUST00000155516|gb|DQ141211|tc|NP1480408	mm|chr2:52595351-52595292	0	NA	132	TCTCATGTGTCAGAAAAGCGCTCTCCCACTCTGCTACACCCCTGTTACATCCCTGCTACA	2173	0	A_55_P2174339	Stam2	ENSMUST00000155516	ens|signal transducing adaptor molecule (SH3 domain and ITAM motif) 2 [Source:MGI Symbol;Acc:MGI:1929100] [ENSMUST00000155516]	0.783284	0.110639	1.53542	0.312797	3.92644	2	0	0	0	1.21008	0.975069	0.684245	0.692179	0.751274	0.906399	1.79652	1.18874	1.62101	0.673301	0.692452	0.808727
943	DATA	2123	13	155	ref|NM_153166|ens|ENSMUST00000126993|ens|ENSMUST00000024805|ref|XM_006524249	mm|chr17:29294933-29294874	0	NA	2898	TGTCTGGTCCTGTGCCTGTCTGAGACTGTCTCTGTGGAACTTGCCTTAAATTGAAGTAAA	2197	0	A_51_P124345	Cpne5	NM_153166	ref|Mus musculus copine V (Cpne5), mRNA [NM_153166]	0.804822	0.0987529	1.06972	0.0381735	4.33366	2	0	0	0	1.32531	1.01157	0.930668	0.800293	0.905762	0.708412	1.02774	1.10235	1.07909	0.902415	1.17497	1.03143
948	DATA	2133	14	1	gb|AK077776|riken|5830435H10|nap|NAP089317-1	mm|chr4:149948303-149948362	0	NA	564	CCCAGTGTAGCAAGTGTTCTTAATCTGTAAGCCACTTCTTGAGCCTCAAAATATTTTACA	1903	0	A_66_P129168	AK077776	AK077776	gb|Mus musculus adult male thymus cDNA, RIKEN full-length enriched library, clone:5830435H10 product:unclassifiable, full insert sequence. [AK077776]	1.15227	0.165042	0.338816	0.314453	3.96735	3	0	0	0	1.70033	0.94243	1.66365	1.29211	1.19447	0.97022	0.000165496	0.621575	0.394708	0.888024	1.17344	1.15889
952	DATA	2143	14	11	ref|NM_001142410|ens|ENSMUST00000109922|nap|NAP028210-1	mm|chr2:150094850-150094909	0	NA	1831	GGAGAGAAACCTTATGAATGTAAACAATGTGGTAAAGCCTTTGCATGTTCTCGTCGTCTC	1921	0	A_66_P129351	Gm14124	NM_001142410	ref|Mus musculus predicted gene 14124 (Gm14124), mRNA [NM_001142410]	0.781018	0.191529	1.12067	0.235051	1.94024	3	0	0	0	1.13609	0.933535	1.24326	0.870641	0.911303	0.561109	0.926694	1.05324	1.38206	1.10151	0.7154	1.16516
957	DATA	2163	14	31	ref|NM_026102|ref|NM_001286452|ref|NM_172464|ens|ENSMUST00000085299	mm|chr12:73090764-73090823	0	NA	3423	AGGAGAGGTGTTCGACAAAGACCTTTCAAAACTCAAACGGAACCGGAAACGCATTTCCAA	1960	0	A_51_P302192	Daam1	NM_026102	ref|Mus musculus dishevelled associated activator of morphogenesis 1 (Daam1), transcript variant 1, mRNA [NM_026102]	1.17499	0.0888149	0.862403	0.125027	3.53027	3	0	0	0	0.974019	0.807571	0.809159	1.23999	1.21117	1.07379	0.932255	0.936895	0.718058	1.20812	0.900992	1.18797
963	DATA	2183	14	51	ref|NM_011034|gb|AK184215|gb|AK163984|gb|AK010688	mm|chr4:116372029-116372088	0	NA	840	GGGCAGACCAATCTTCTATCAGTCACAGAAAACAACCTGTTAATTCTTTTTTCTTCTTTT	1998	0	A_55_P2904683	Prdx1	NM_011034	ref|Mus musculus peroxiredoxin 1 (Prdx1), mRNA [NM_011034]	0.909103	0.0593282	1.18021	0.23366	1.9478	2	0	0	0	1.001	0.55636	0.92915	0.840756	0.939241	0.947313	0.990905	1.10836	1.44135	1.04055	1.04862	1.15639
968	DATA	2195	14	63	ref|NM_013685|ref|NM_001083967|ens|ENSMUST00000114985|ens|ENSMUST00000078486	mm|chr18:69847074-69847133	0	NA	6914	GAATCATTATGAGTAAAAGTTTGTTACTTTATTTTGCTATTTAAAAGATGTTATTTTACC	2021	0	A_65_P10725	Tcf4	NM_013685	ref|Mus musculus transcription factor 4 (Tcf4), transcript variant 1, mRNA [NM_013685]	0.921886	0.109483	1.38243	0.519828	1.50158	2	0	0	0	0.866174	0.261945	1.06979	0.825811	0.898764	1.04108	1.04228	1.1242	1.98081	0.934045	0.903548	1.05155
970	Mean	2199	14	67	ens|ENSMUST00000117955	mm|chr2:170779725-170779666	0	NA	599	TTTCTAAGACTTACAGCTACCTGACCCCAGACCTCTGGAAAGAGACTGTCCTCACCAGGA	2028	0	A_55_P2184478	ENSMUST00000117955	ENSMUST00000117955	ens|predicted gene 14263 [Source:MGI Symbol;Acc:MGI:3649393] [ENSMUST00000117955]	0.965941	0.0473556	1.04543	0.0246414	2.57917	3	0	0	0	0.939811	0.953974	0.957992	1.01169	0.917126	0.969007	1.03547	1.0735	1.02733	1.04	1.02461	1.04949
978	DATA	2211	14	79	ref|NM_145502|ref|NM_001164359|ref|NM_001164360|ens|ENSMUST00000071698	mm|chr19:44109550-44109491	0	NA	3215	GACCATCCTTCAGGGACGTTCCTTTTGGTAAATATACACTGTAATCTTTAAGTCTAAATT	2051	0	A_55_P2141287	Erlin1	NM_145502	ref|Mus musculus ER lipid raft associated 1 (Erlin1), transcript variant 1, mRNA [NM_145502]	0.91491	0.113228	1.31016	0.210359	2.86567	3	0	0	0	1.04085	0.882617	0.494239	0.874392	1.04282	0.827515	1.20007	1.55272	1.1777	0.920777	0.956305	1.02999
988	DATA	2230	14	98	ref|NM_009208|ref|XM_006496458|ref|XM_006496455|ref|XM_006496454	mm|chr1:75555599-75555658	0	NA	4033	TGACTTTCACAGCCCAGACGGCACCGGCTTTGAAGTCATTACAACACACTCCGTGTCTTG	2088	0	A_55_P2112991	Slc4a3	NM_009208	ref|Mus musculus solute carrier family 4 (anion exchanger), member 3 (Slc4a3), mRNA [NM_009208]	1.2606	0.031077	0.717369	0.139318	6.59169	2	0	0	0	0.884244	1.06461	1.23305	1.22474	1.2796	1.27747	0.790899	0.804517	0.556691	0.979714	0.99227	0.912204
990	DATA	2237	14	105	ref|NM_172762|ens|ENSMUST00000045994|ref|XM_006531182|ref|XR_387759	mm|chr8:129493897-129489478	0	NA	393	AAGACTGGCAAACAGGGAAAGTGCTCTAGCAAGTGCTGATCTAGAAGAAGAGCTTCATCA	2101	0	A_55_P2793591	Rbm34	NM_172762	ref|Mus musculus RNA binding motif protein 34 (Rbm34), mRNA [NM_172762]	1.27233	0.200238	0.668618	0.42254	2.23629	2	0	0	0	0.736745	2.17641	0.527365	1.47784	1.26133	1.07781	1.03056	0.771004	0.204294	1.1029	0.836392	0.797351
992	Mean	2242	14	110	ref|NM_011296|ens|ENSMUST00000119199|ens|ENSMUST00000121730|ens|ENSMUST00000174620	mm|chr17:34092119-34092060	0	NA	26	TCTAGTGATCTCTAAGAAGTTCCAGCACATTTTGCGAGTACTCAACACCGACATCGATGG	2110	0	A_55_P2135631	Rps18	NM_011296	ref|Mus musculus ribosomal protein S18 (Rps18), mRNA [NM_011296]	0.922062	0.030675	1.10003	0.0769625	3.72052	2	0	0	0	1.04062	1.08553	0.886123	0.88942	0.950292	0.926474	1.13126	1.15646	1.01236	0.937225	0.934979	1.04925
998	DATA	2257	14	125	ref|NM_177391|ens|ENSMUST00000050349|ens|ENSMUST00000161178|gb|AK083325	mm|chr15:82176043-82176102	0	NA	2647	TTTGAACTCACAGAGATCCTCCTGCCTCTGCATCCCAAGTAGTGTAAGATTAAAGGTGTG	2139	0	A_55_P2809495	Fam109b	NM_177391	ref|Mus musculus family with sequence similarity 109, member B (Fam109b), mRNA [NM_177391]	0.806617	0.162363	1.35601	0.247983	3.21036	3	0	0	0	0.871277	0.861135	0.761232	0.701101	0.725168	0.993583	1.64121	1.19127	1.23555	1.0623	0.966147	0.990025
1007	DATA	2270	14	138	ref|NM_026116|ens|ENSMUST00000170208|ens|ENSMUST00000034206|gb|AK010779	mm|chr8:96593978-96593919	0	NA	2401	ATGACCTTAATAAAGATTTGCTGAATGGATACAAGATTCGCTGTAACAACCACACAGAAC	2164	0	A_66_P108392	Bbs2	NM_026116	ref|Mus musculus Bardet-Biedl syndrome 2 (human) (Bbs2), mRNA [NM_026116]	0.663506	0.066054	1.07854	0.320726	2.19527	2	0	0	0	1.66258	0.900216	1.77253	0.705696	0.697441	0.587383	0.790123	1.02156	1.42394	0.735184	0.81752	0.885833
1008	DATA	2271	14	139	ref|NM_029936|ens|ENSMUST00000065630|gb|BC080729|gb|AK019495	mm|chr9:52907126-52907067	0	NA	2800	AAACAGCTTTGGAAAACAGTTTTGAGTTTTGAAACATCAAGGAACGTACTCAGAATAAGG	2166	0	A_51_P384609	Ddx10	NM_029936	ref|Mus musculus DEAD (Asp-Glu-Ala-Asp) box polypeptide 10 (Ddx10), mRNA [NM_029936]	0.607698	0.259449	1.57248	0.847053	1.88627	2	0	0	0	1.23441	0.553411	1.21881	0.65529	0.840057	0.327748	0.925413	1.26081	2.53121	0.788226	0.758334	0.906285
1009	DATA	2272	14	140	ref|NM_011176|ens|ENSMUST00000034478|ref|XM_006510098|ref|XM_006510099	mm|chr9:30897308-30897249	0	NA	2883	CTCAGAGTTCTTCCAAAGTGGGACCCCCTCAAGAGTTGGAGAGAGAACTTGCGTGCTAGC	2168	0	A_51_P282837	St14	NM_011176	ref|Mus musculus suppression of tumorigenicity 14 (colon carcinoma) (St14), mRNA [NM_011176]	0.10071	0.174082	3.27797	4.8739	1.12839	2	0	0	0	0.374065	0.498443	0.699986	0.301723	0.000203066	0.000203066	0.395133	0.533472	8.9053	0.000203066	0.000203066	0.291062
1017	DATA	2286	14	154	ref|NM_009453|ens|ENSMUST00000112289|ref|XM_006528797|ref|XM_011247814	mm|chrX:160374654-160374595	0	NA	1532	AGTCTGACAGGAAGAGCAGTAGCAGACACAGGGTGAAGAAATCTCACAGATATGGAATGA	2196	0	A_52_P1662	Zrsr2	NM_009453	ref|Mus musculus zinc finger (CCCH type), RNA binding motif and serine/arginine rich 2 (Zrsr2), transcript variant 1, mRNA [NM_009453]	1.23115	0.169954	0.836275	0.154008	2.98204	3	0	0	0	0.634726	1.06625	1.21637	1.03502	1.32341	1.33502	0.659561	0.907388	0.941878	0.922249	1.0502	0.907944
1018	DATA	2287	14	155	ref|NM_001029993|ref|NM_001029994|ens|ENSMUST00000177123|ens|ENSMUST00000017622	mm|chr8:124940482-124940541	0	NA	3025	ACATTGTCACGGCGAGAGGAGCTCCTTAAACAGCTCAAAGCGGTTGAGGACGCCATCGCT	2198	0	A_51_P121359	Zc3h18	NM_001029993	ref|Mus musculus zinc finger CCCH-type containing 18 (Zc3h18), transcript variant 1, mRNA [NM_001029993]	1.22419	0.122771	0.875458	0.0552977	4.48587	2	0	0	0	0.459719	1.05041	1.11178	1.2073	1.11074	1.35453	0.927733	0.881074	0.817566	1.00796	1.06337	1.00783
1023	DATA	2297	15	1	ref|NM_011361|ref|NM_001161845|ref|NM_001161847|ref|NM_001161850	mm|chr10:21719390-21719449	0	NA	2136	CAGTTGTCAGTCAAAGCCGTTGGTGTTTTCATTGTTTAAAATGTCACCTATAAAACGGGC	2217	0	A_51_P118237	Sgk1	NM_011361	ref|Mus musculus serum/glucocorticoid regulated kinase 1 (Sgk1), transcript variant 6, mRNA [NM_011361]	1.18545	0.128169	0.899447	0.155042	2.46257	3	0	0	0	1.1926	1.28863	0.869587	1.1089	1.33342	1.11403	0.748885	0.890843	1.05861	0.694987	0.887237	0.812273
1027	DATA	2301	15	5	ref|NM_001159724|ens|ENSMUST00000108450|gb|BC009088|gb|AK075815	mm|chr7:20309924-20309866	0	NA	1580	CAAGGTCTCATGCTACCTCCACACGAGTCACCTAAGGACGACATGGAGTCCCATCTGGAT	2224	0	A_52_P188678	Pvrl2	NM_001159724	ref|Mus musculus poliovirus receptor-related 2 (Pvrl2), transcript variant 2, mRNA [NM_001159724]	0.792161	0.0665181	1.15399	0.0707062	6.45575	3	0	0	0	1.28602	1.3306	1.0476	0.778385	0.864489	0.73361	1.10424	1.23493	1.1228	0.812635	0.85033	0.834353
1039	DATA	2339	15	43	ref|NM_025447|ens|ENSMUST00000022203|ens|ENSMUST00000118116|ref|XM_006517735	mm|chr13:107747251-107748764	0	NA	945	CCGTTCCATGGACATAGATGACTTCATCAGGTTGCTACATGGATTCAATGCAGAAGGCAT	2296	0	A_52_P537381	Dimt1	NM_025447	ref|Mus musculus DIM1 dimethyladenosine transferase 1-like (S. cerevisiae) (Dimt1), mRNA [NM_025447]	1.10845	0.010519	0.90664	0.12389	2.81123	2	0	0	0	1.07709	0.723828	1.08757	1.1036	1.10122	1.12051	0.940868	1.00982	0.769235	0.969259	1.03851	1.05849
1043	DATA	2347	15	51	gb|AK087687|tc|TC1590903|riken|E330005K07	mm|chr5:3615865-3615923	0	NA	1227	ATTTATGGGAGAATCTAGTCTGCAGTTCTGGCTGCTGCTCCTGTCTTGTCTAGTTGTACA	2311	0	A_51_P137688	Pex1	AK087687	gb|Mus musculus 2 days pregnant adult female ovary cDNA, RIKEN full-length enriched library, clone:E330005K07 product:hypothetical protein, full insert sequence. [AK087687]	0.850163	0.105464	1.30046	0.221022	3.18478	2	0	0	0	0.979286	0.921613	0.852021	0.762436	0.820878	0.967175	1.45528	1.04734	1.39876	0.919306	0.830105	1.0458
1051	DATA	2365	15	69	ens|ENSMUST00000121568	mm|chrX:87989954-87989895	0	NA	442	GACCAACTTAAGCAAGTTGGGCACCCCTGAATCTGGCATGGCAGAAAATCTCTTTCACAA	2343	0	A_66_P104696	ENSMUST00000121568	ENSMUST00000121568	ens|predicted gene 6977 [Source:MGI Symbol;Acc:MGI:3647597] [ENSMUST00000121568]	0.889193	0.05629	1.11822	0.0275214	6.33095	2	0	0	0	1.25517	0.880399	0.77915	0.844145	0.952295	0.871139	1.11461	1.09268	1.14737	1.07355	0.939453	1.05005
1056	DATA	2377	15	81	ref|NM_031499|ens|ENSMUST00000178961|ens|ENSMUST00000076061|gb|BC172602	mm|chr6:132550457-132550516	0	NA	687	ACTCAAGGCCCACCCCCAACAGGCCCACAGCCGAGACCCACTCAAGGCCCACCCCCAACA	2367	0	A_51_P383857	Prp2	NM_031499	ref|Mus musculus proline rich protein 2 (Prp2), mRNA [NM_031499]	0.856199	0.0663054	1.30585	0.2631	2.87039	2	0	0	0	0.804567	0.922874	0.789931	0.806193	0.830993	0.931411	1.57214	1.04606	1.29934	0.996663	0.970847	1.02898
1058	DATA	2383	15	87	ref|NM_011802|ref|NM_001044389|ens|ENSMUST00000015501|ens|ENSMUST00000113824	mm|chr9:65168664-65168723	0	NA	1414	TCCAGAAAAGAATTCTCGAAAACTACGTGGAGAGACAGTTCAAGTTGATACAACAAATGT	2377	0	A_55_P2576160	Clpx	NM_011802	ref|Mus musculus caseinolytic mitochondrial matrix peptidase chaperone subunit (Clpx), transcript variant 1, mRNA [NM_011802]	0.698583	0.36939	1.41763	0.19469	2.98264	3	0	0	0	1.16487	1.0484	0.455497	0.869565	0.951504	0.274679	1.21804	1.42783	1.60702	0.968997	1.02286	0.990747
1065	DATA	2402	15	106	ens|ENSMUST00000153982	mm|chr11:106065956-106065897	0	NA	572	TTTCTGCCATTCTAATTGAGGCATTGGCTAGCTCTCATGTTGAGCTGGTGATCTCCTACA	2414	0	A_55_P2721509	Ccdc47	ENSMUST00000153982	ens|coiled-coil domain containing 47 [Source:MGI Symbol;Acc:MGI:1914413] [ENSMUST00000153982]	1.11174	0.334776	0.37483	0.337282	2.68586	3	0	0	0	1.12631	2.11391	1.41149	1.43628	1.13135	0.767595	0.000346023	0.469438	0.654705	0.661193	1.10569	1.12169
1071	DATA	2411	15	115	ref|NM_033616|ens|ENSMUST00000078827|ref|XM_003084455|ref|XM_006496523	mm|chr8_random:111631-111572	0	NA	2659	TGTGTCTATCTCTATGGAGTCCCTACAAACAATGACCAATAAACAATGGTAAGGCGTACC	2432	0	A_55_P2019601	Csprs	NM_033616	ref|Mus musculus component of Sp100-rs (Csprs), mRNA [NM_033616]	1.07886	0.158751	0.79368	0.1094	2.56201	3	0	0	0	0.718832	0.709316	1.2693	1.26198	0.994434	0.980159	0.667592	0.850045	0.863404	1.05263	0.834856	1.79745
1081	DATA	2430	15	134	ref|NM_008486|ens|ENSMUST00000049004|ens|ENSMUST00000107392|ref|XM_006540678	mm|chr7:86966775-86966716	0	NA	3336	CACGAGATCCAGAACCAAAGAATCAACAGGGCACAAGATCTATATATATTTTTAAGAGAA	2469	0	A_55_P2085905	Anpep	NM_008486	ref|Mus musculus alanyl (membrane) aminopeptidase (Anpep), mRNA [NM_008486]	0.724842	0.110635	1.10861	0.111885	4.2244	3	0	0	0	1.57927	0.941497	1.02507	0.803608	0.772563	0.598356	1.09824	1.22532	1.00227	0.971026	0.961403	1.02138
1082	DATA	2434	15	138	ens|ENSMUST00000153331|gb|AK051411|riken|D130046P17|nap|NAP085608-1	mm|chr5:5131935-5131876	0	NA	4090	GACTACCACAAGTTCATGCCTACGATGTAAAAGACCTTGGAATCAATTTCCACTACCACC	2476	0	A_55_P2718618	Cdk14	ENSMUST00000153331	ens|cyclin-dependent kinase 14 [Source:MGI Symbol;Acc:MGI:894318] [ENSMUST00000153331]	1.19638	2.06873	0.00200147	0	1	2	0	0	0	1.97879	2.5402	1.83618	3.58514	0.00200147	0.00200147	0.00200147	0.00200147	0.00200147	0.00200147	2.04567	0.00200147
1084	DATA	2455	15	159	ref|NM_011864|ref|NM_001201470|ens|ENSMUST00000025833|ref|XM_006527064	mm|chr19:32741618-32741677	0	NA	3575	ATAACTGTTTCAGTGTCCCGCTGGTACCTGTTCTTATTCAATAAATCTCTCAAAAGACCA	2514	0	A_55_P2080021	Papss2	NM_011864	ref|Mus musculus 3'-phosphoadenosine 5'-phosphosulfate synthase 2 (Papss2), transcript variant 1, mRNA [NM_011864]	1.08916	0.0434039	0.901213	0.075852	3.725	3	0	0	0	0.914355	1.03062	1.10237	1.08213	1.13565	1.04971	0.893923	0.82927	0.980447	1.01009	1.09182	0.87963
1091	DATA	2473	16	13	ens|ENSMUST00000117834|ens|ENSMUST00000117490|nap|NAP061984-1|nap|NAP114786-1	mm|chr12:056167728-056167669	0	NA	203	ATTCTTCCTTGAAGAGACACAGCGTGGTGAAGAGTTATTAGCACCAGGTGACTACGAGAA	2239	0	A_55_P2009994	ENSMUST00000117834	ENSMUST00000117834	ens|predicted gene 12859 [Source:MGI Symbol;Acc:MGI:3651649] [ENSMUST00000117834]	0.869266	0.088344	1.16518	0.201258	2.33193	2	0	0	0	1.40491	0.801017	1.16097	0.768558	0.933692	0.905549	1.30298	1.25834	0.934224	0.908209	0.391581	1.22996
1094	DATA	2478	16	18	gb|AK077411|riken|5730403B01|nap|NAP119324-1	mm|chr5:120997418-120997359	0	NA	1627	TGAGCCCTTCATTCTTGAAGGTAGAGAGACAAACAATCCAGAAAACGCCAAGCACTGGAT	2249	0	A_51_P304296	Tpcn1	AK077411	gb|Mus musculus 8 days embryo whole body cDNA, RIKEN full-length enriched library, clone:5730403B01 product:two pore channel 1, full insert sequence. [AK077411]	1.22747	0.321223	0.570977	0.228131	2.88608	3	0	0	0	1.29348	0.547037	1.08804	1.52379	1.27254	0.886099	0.502497	0.38493	0.825505	1.06438	1.50484	1.10687
1095	DATA	2483	16	23	ref|NM_146118|ref|NM_001164357|ref|NM_001164358|ref|NM_001290558	mm|chr2:32270334-32270275	0	NA	3014	GAGGATTTCTTTATTTTGCCCTTTGGAACGACAAGGCAGTGAGGTGCTTCACCAGGAATT	2258	0	A_51_P193173	Slc25a25	NM_146118	ref|Mus musculus solute carrier family 25 (mitochondrial carrier, phosphate carrier), member 25 (Slc25a25), transcript variant 1, mRNA [NM_146118]	1.69301	0.346362	0.647906	0.17712	4.65315	2	0	0	0	0.73334	0.631796	1.02747	1.33112	2.02142	1.72649	0.743781	0.756421	0.443515	0.795927	0.965432	0.823283
1097	DATA	2486	16	26	ref|NM_021519|ens|ENSMUST00000015236|ens|ENSMUST00000142288|ref|XM_006498208	mm|chr2:25417542-25417601	0	NA	608	TAGGCCTGTGTGCCCCCTCAACCCATAACTGCTGTCAAACAAAGCAAACCTTGTAAAGTG	2264	0	A_55_P2007535	Edf1	NM_021519	ref|Mus musculus endothelial differentiation-related factor 1 (Edf1), mRNA [NM_021519]	1.10896	0.164544	0.865075	0.128988	2.02043	3	0	0	0	0.903067	1.04458	1.03614	0.984129	1.04733	1.29542	0.915825	0.960969	0.71843	0.969212	1.0701	1.05479
1101	DATA	2494	16	34	ref|NM_177687|ens|ENSMUST00000046303|ref|XM_011241325|ref|XM_011241329	mm|chr6:134807823-134807882	0	NA	2457	CAGTGGGGCGACTCAGTCGTAGACTCTTACTTTGCAGAACTTTGTGTTGCTTTGTTTGTT	2279	0	A_52_P541270	Crebl2	NM_177687	ref|Mus musculus cAMP responsive element binding protein-like 2 (Crebl2), mRNA [NM_177687]	0.912952	0.0587749	1.02239	0.0442415	2.57658	3	0	0	0	0.98776	1.12565	0.883206	0.922051	0.966646	0.850158	0.99694	0.996747	1.07347	1.16923	0.973604	1.05453
1103	DATA	2496	16	36	ref|NM_134002|ref|NM_001159591|ens|ENSMUST00000079773|ens|ENSMUST00000085435	mm|chr10:80103397-80103456	0	NA	2316	AGAAATGAACTTATGTTTCTCTGGCGCTTCCTTGAAGCCGTAGAGTTTAGGGGCTTTTTT	2283	0	A_55_P2041045	Csnk1g2	NM_134002	ref|Mus musculus casein kinase 1, gamma 2 (Csnk1g2), transcript variant 1, mRNA [NM_134002]	1.14988	0.0948113	0.934596	0.0621864	3.28856	3	0	0	0	0.940719	1.03027	0.714459	1.14861	1.0557	1.24531	0.92968	0.875014	0.999095	1.07672	0.975162	1.00925
1116	DATA	2518	16	58	ref|NM_001081194|ens|ENSMUST00000107363|ens|ENSMUST00000107361|tc|TC1703767	mm|chr11:100601775-100601716	0	NA	3700	TGGTTTCCAGCCCTCCTTTCTCACTCAATGCCCCACCCAGGCGCACTTTTGGATAAAAAA	2325	0	A_55_P2182458	Kcnh4	NM_001081194	ref|Mus musculus potassium voltage-gated channel, subfamily H (eag-related), member 4 (Kcnh4), mRNA [NM_001081194]	0.85338	0.115874	1.38443	0.232661	3.53883	2	0	0	0	0.845875	0.92211	0.806128	0.834075	0.74837	0.977694	1.30887	1.19894	1.64548	0.908291	0.857675	0.946486
1119	DATA	2528	16	68	ref|NM_001253847|ref|NM_134048|ref|NM_001253848|ens|ENSMUST00000064240	mm|chr12:32170476-32170417	0	NA	3224	GCACTATTTCTAGTGAGAAATTCTTGTTATTAGAAGCATGGACGTGAAATAGTGTGACAT	2342	0	A_52_P368244	Cbll1	NM_001253847	ref|Mus musculus Casitas B-lineage lymphoma-like 1 (Cbll1), transcript variant 1, mRNA [NM_001253847]	0.858561	0.143128	1.21857	0.166486	2.84015	3	0	0	0	1.22411	0.338359	0.444201	0.982325	0.891533	0.701824	1.36379	1.25506	1.03687	1.16848	1.114	1.47945
1120	DATA	2530	16	70	ref|NM_175352|ens|ENSMUST00000060798|gb|AK082614|gb|BC112388	mm|chr5:115572676-115572617	0	NA	3541	GGAAACATCTCTGTCCTTAAAATCCTCAGTCCAAGACAAATCAGTTGATTCTATTTGTAT	2346	0	A_55_P2760042	Unc119b	NM_175352	ref|Mus musculus unc-119 homolog B (C. elegans) (Unc119b), mRNA [NM_175352]	1.08426	0.0589757	0.971573	0.041744	2.70118	3	0	0	0	1.0742	0.924445	0.97851	1.02932	1.07687	1.14657	0.979207	0.926538	1.00897	0.942118	0.921887	0.991357
1127	DATA	2543	16	83	ref|NM_009451|ens|ENSMUST00000071135|gb|AK013717|gb|BC049112	mm|chr17:57219665-57219606	0	NA	2051	CCGTAAGTCCCCGTATGTTCCTGCCCTTGTGCCTTAGTTCAGTTCCTACCAGAGAAGTGC	2371	0	A_55_P2793063	Tubb4a	NM_009451	ref|Mus musculus tubulin, beta 4A class IVA (Tubb4a), mRNA [NM_009451]	0.839662	0.107662	1.3139	0.25902	2.9283	2	0	0	0	0.748838	0.935976	0.688919	0.824374	0.74046	0.95415	1.2668	1.08165	1.59323	1.05013	1.03167	1.08378
1130	DATA	2547	16	87	ens|ENSMUST00000182998	mm|chr14:64048059-64048000	0	NA	508	TGGCCACAGTCTATGCCAGCACTACAACTCAGAAGACTGTCGATGGCCTCTCTGAGAAGC	2378	0	A_66_P128490	ENSMUST00000182998	ENSMUST00000182998	ens|predicted gene, 21430 [Source:MGI Symbol;Acc:MGI:5434785] [ENSMUST00000182998]	0.821061	0.0984865	1.29523	0.042482	7.65714	2	0	0	0	0.979448	0.635528	0.599541	0.761576	0.934742	0.766863	1.30593	1.33134	1.24843	1.05402	1.00523	1.37735
1136	DATA	2558	16	98	ref|NM_001113387|ens|ENSMUST00000186346|ens|ENSMUST00000119429|ref|XM_006536914	mm|chr1:66981100-66976853	0	NA	107	AGATTGCCGACTTCAAGGAGGCATTTCTCCTGTTTGACAGAACAGGTGAATGCAAGATCA	2399	0	A_52_P273120	Myl1	NM_001113387	ref|Mus musculus myosin, light polypeptide 1 (Myl1), transcript variant 3f, mRNA [NM_001113387]	1.9052	1.04626	0.477247	0.432929	2.18433	2	0	0	0	0.644316	0.404768	0.421027	1.09941	1.52857	3.08764	0.845151	0.586403	0.000185816	0.900276	1.19216	1.2901
1138	DATA	2562	16	102	ref|NM_172755|ref|NM_001168290|ens|ENSMUST00000130492|ens|ENSMUST00000093458	mm|chr8:72781450-72781509	0	NA	3262	AAGTCGCTGAAAGTTGGCATGATCACTGCCCCAAAGAGGGTGTGTCTCATCCAGGAGTCA	2407	0	A_51_P147714	Sugp2	NM_172755	ref|Mus musculus SURP and G patch domain containing 2 (Sugp2), transcript variant 2, mRNA [NM_172755]	1.10128	0.195672	0.811752	0.155341	2.00723	3	0	0	0	1.2686	0.981649	1.30619	0.950955	1.03037	1.32252	0.887877	0.914347	0.633031	0.873516	0.964753	0.866194
1140	DATA	2564	16	104	ref|NM_027161|ref|NM_001253856|ref|NM_001253858|ens|ENSMUST00000023920	mm|chr4:154844906-154844965	0	NA	906	AGCTCAAACCCCACTGGCATGCCAGCCCTTTGAGGGGAAAATAAAGTTTACGTAAACATG	2411	0	A_55_P2089015	Tmem52	NM_027161	ref|Mus musculus transmembrane protein 52 (Tmem52), transcript variant 1, mRNA [NM_027161]	1.41761	0.140535	0.630103	0.557743	2.37144	2	0	0	0	0.697416	1.60689	0.683524	1.49661	1.25535	1.50086	0.828252	0.000340203	1.06172	1.11941	1.1496	0.600033
1147	DATA	2580	16	120	ref|NM_198037|ens|ENSMUST00000030257|gb|AK004514|gb|BC058676	mm|chr4:100676055-100676114	0	NA	4666	TGGACGGACTCCCGTGTTTCCTAGCGGTACCTGGACACCACCATTACTGTACAGAGCTCA	2443	0	A_51_P200339	Cachd1	NM_198037	ref|Mus musculus cache domain containing 1 (Cachd1), mRNA [NM_198037]	1.30328	0.171953	0.856609	0.199627	2.93636	3	0	0	0	0.941088	0.932568	1.18729	1.27	1.1504	1.48944	0.635323	0.911348	1.02316	0.851625	0.770844	0.836916
1148	DATA	2583	16	123	ref|NM_008793|ens|ENSMUST00000147132|ens|ENSMUST00000130521|ens|ENSMUST00000137177	mm|chr10:79784366-79784307	0	NA	2175	CAGTGCCCAAAACCATGCATGCACAGATCCCTGGAGGCTGGAGAGCCAGAGATGCCTGGC	2449	0	A_51_P205286	Pcsk4	NM_008793	ref|Mus musculus proprotein convertase subtilisin/kexin type 4 (Pcsk4), mRNA [NM_008793]	0.625264	0.136344	1.08535	0.277067	2.58062	2	0	0	0	1.51355	1.50208	1.31734	0.53877	0.782435	0.554587	0.828078	1.37868	1.04928	0.851985	0.792337	0.890866
1152	DATA	2591	16	131	ens|ENSMUST00000178021|gb|AK017110|riken|4933438K12|nap|NAP001848-001	mm|chr16:13982971-13982912	0	NA	1743	CTAGTTCTAGTATAAGCGCTGTCTATAGCAGTGTGTGTGTGTGTGTGTGTGTGTGTGTGT	2464	0	A_55_P2097161	Ifitm7	ENSMUST00000178021	ens|interferon induced transmembrane protein 7 [Source:MGI Symbol;Acc:MGI:1921732] [ENSMUST00000178021]	0.887504	0.100684	1.13464	0.169902	2.16741	3	0	0	0	1.09508	1.02894	0.877588	0.771558	0.952864	0.93809	1.13568	0.964221	1.30402	0.889347	0.975879	1.06673
1154	DATA	2594	16	134	ref|NM_023371|ens|ENSMUST00000034689|gb|AK160228|gb|AK003369	mm|chr9:20467782-20467841	0	NA	561	TCCTGCTACTGTCACACAGTATTTATTGTTCCTAAAATGACTGGGAGGGGCTCTGAGCAT	2470	0	A_51_P199866	Pin1	NM_023371	ref|Mus musculus protein (peptidyl-prolyl cis/trans isomerase) NIMA-interacting 1 (Pin1), mRNA [NM_023371]	0.880477	0.0220977	1.0788	0.10109	3.31962	2	0	0	0	1.50002	0.920625	0.777927	0.856524	0.900069	0.884837	1.16819	1.09911	0.969096	0.958168	0.885007	1.08042
1161	Mean	2604	16	144	ref|NM_009077|ens|ENSMUST00000172506|ens|ENSMUST00000120418|ens|ENSMUST00000141618	mm|chr7:52975771-52975829	0	NA	470	ACACTGTGCTTCTGTCTGGTCTTCGGAAGGGCCGAGAGGTGTACCGACATTTTGGCAAGG	2488	0	A_55_P2128225	Rpl18	NM_009077	ref|Mus musculus ribosomal protein L18 (Rpl18), mRNA [NM_009077]	1.0492	0.0311066	0.928253	0.0537344	3.37389	3	0	0	0	1.02482	1.00781	1.00131	1.02158	1.08289	1.04312	0.978219	0.935129	0.871412	1.00196	0.995997	1.03574
1166	DATA	2612	16	152	ref|NM_001081218|ref|XM_006514010|ref|XM_011243543|ref|XM_011243546	mm|chr10:82197189-82201045	0	NA	1764	TTTATTTGCTACCAAAAGGAAAACAAAGTATGTCAAAGGTAGGAAATGCAGACGTGCCTG	2502	0	A_52_P581326	Hcfc2	NM_001081218	ref|Mus musculus host cell factor C2 (Hcfc2), mRNA [NM_001081218]	0.862329	0.163842	1.15663	0.0274902	3.06833	2	0	0	0	0.977251	1.07462	0.592368	0.894089	1.00797	0.684932	1.1256	1.17795	1.16635	1.1839	0.969102	1.14587
1170	Mean	2619	16	159	ref|NM_207523|ens|ENSMUST00000148102|ens|ENSMUST00000096020|ens|ENSMUST00000099431	mm|chr11:77995005-77994946	0	NA	340	GGATGTCAAGGCCAATAAGCATCAGATCAAACAGGCTGTCAAGAAACTCTATGACATCGA	2515	0	A_55_P2109874	Rpl23a	NM_207523	ref|Mus musculus ribosomal protein L23A (Rpl23a), mRNA [NM_207523]	0.9025	0.0897387	1.10146	0.0552204	3.27062	3	0	0	0	1.06951	0.96237	0.928913	0.824795	0.881985	1.00072	1.03771	1.13407	1.13262	1.02641	1.00365	0.997252
1175	DATA	2643	17	19	ref|NM_007484|ref|NM_001291859|ens|ENSMUST00000002303|gb|AK011599	mm|chr3:104597300-104597359	0	NA	978	GTTTCTGCTTTGGGTAGTAGCCTTGTTATTTGACTTAACTTGGTGGGGACATGAATAAAG	2561	0	A_51_P282508	Rhoc	NM_007484	ref|Mus musculus ras homolog gene family, member C (Rhoc), transcript variant 2, mRNA [NM_007484]	1.12624	0.0895291	0.828181	0.0261308	5.53542	2	0	0	0	0.904215	0.700796	1.46934	1.12062	1.21845	1.03966	0.855241	0.826213	0.80309	0.976813	1.04724	1.03832
1181	DATA	2657	17	33	gb|BB476958	mm|chr2:59960228-59960169	0	NA	567	TTGATAACGCATAGGTGTAAAGATTTCATCCAAGAAAGGGCTTTGAAATTGTAGTTTCAG	2588	0	A_65_P06622	BB476958	BB476958	gb|BB476958 RIKEN full-length enriched, 13 days embryo heart Mus musculus cDNA clone D330022D14 3'. [BB476958]	1.16734	0.120049	0.732637	0.230619	2.89591	3	0	0	0	1.07587	0.889018	1.21838	1.30525	1.11048	1.08628	0.480499	0.932903	0.784507	1.30616	0.715331	1.09532
1182	DATA	2660	17	36	ref|NM_008112|ens|ENSMUST00000059515|gb|AK079690|gb|AK143681	mm|chr13:3565007-3565066	0	NA	2180	TGTTCCAAAATGGCTCCAGATGATTTCTGTACTGCAAAATAAAGCCAAACTCTGGAAACC	2594	0	A_55_P2732693	Gdi2	NM_008112	ref|Mus musculus guanosine diphosphate (GDP) dissociation inhibitor 2 (Gdi2), mRNA [NM_008112]	1.13865	0.119637	0.864508	0.276837	1.57445	2	0	0	0	0.964989	0.916889	0.816177	1.06528	1.07396	1.2767	1.01573	1.0328	0.544997	1.13907	1.06265	1.09076
1200	DATA	2702	17	78	ref|NM_018760|ref|NM_001197147|ref|NM_001136260|ens|ENSMUST00000148750	mm|chr5:89667693-89667752	0	NA	6503	CCTTTGTCAGTCACGTGTTGCTGTTTAATATAGCAAATGATTGTCTTCCATGTTTTTGTT	2677	0	A_55_P2912219	Slc4a4	NM_018760	ref|Mus musculus solute carrier family 4 (anion exchanger), member 4 (Slc4a4), transcript variant 1, mRNA [NM_018760]	0.888475	0.115035	1.30649	0.228666	2.82855	2	0	0	0	1.12118	0.897331	0.765499	0.781074	0.874487	1.00986	1.063	1.3398	1.51668	0.814193	0.853506	0.96339
1222	DATA	2777	17	153	ref|NM_177322|ens|ENSMUST00000066412|ref|XM_006516534|ref|XM_011244264	mm|chr13:30474638-30474697	0	NA	2185	TCCTCCACATATATGTACATATGTATCTCTAAGCTGTCATTTGATGAAGTTTTGGCAATG	2818	0	A_52_P645862	Agtr1a	NM_177322	ref|Mus musculus angiotensin II receptor, type 1a (Agtr1a), mRNA [NM_177322]	0.777164	0.0983717	1.24444	0.113068	5.40028	3	0	0	0	0.681856	1.12166	0.854568	0.663588	0.835531	0.832371	1.12166	1.26739	1.34427	1.05964	1.02631	1.19116
1239	DATA	2823	18	35	ref|NM_028027|ref|NM_001166413|ens|ENSMUST00000019611|ens|ENSMUST00000167353	mm|chr10:126619670-126619611	0	NA	2167	AGGATGAGGGCAGGGACCAGATAGAAATTATTGGCCTGGGTTGTGATTTTGTTTTCGAGT	2593	0	A_51_P451516	Arhgef25	NM_028027	ref|Mus musculus Rho guanine nucleotide exchange factor (GEF) 25 (Arhgef25), transcript variant 1, mRNA [NM_028027]	1.02113	0.0567739	0.786575	0.0897304	3.82611	3	0	0	0	0.91782	1.24877	1.34571	1.06687	0.957593	1.03893	0.76888	0.707011	0.883835	1.02069	1.11677	0.927114
1248	DATA	2842	18	54	ref|NM_001083921|ref|NM_019705|ens|ENSMUST00000028964|ens|ENSMUST00000109847	mm|chr2:152142134-152142075	0	NA	2332	AAACAGCCCATGGGGTTCAGCTCTGCATCCTCCTCTTTAAGTGAATTAAAGTGGTTTTCC	2631	0	A_55_P2039105	Rbck1	NM_001083921	ref|Mus musculus RanBP-type and C3HC4-type zinc finger containing 1 (Rbck1), transcript variant 1, mRNA [NM_001083921]	1.07911	0.14264	0.788079	0.151521	2.42232	3	0	0	0	1.07022	1.16634	1.10405	1.1733	1.14902	0.915001	0.884554	0.866246	0.613436	1.00535	0.992213	1.06027
1250	DATA	2846	18	58	ref|NM_001195544	mm|chr11:98459645-98460098	0	NA	40	CTCCCTGGTGTTTACCTGGCCTCCCTTGGCAGTCATACAGGTTCGTCTATTCCCCAGCTT	2639	0	A_66_P125949	Gm12	NM_001195544	ref|Mus musculus predicted gene 12 (Gm12), mRNA [NM_001195544]	0.82805	0.0733466	1.1156	0.191932	2.42399	2	0	0	0	1.03439	1.29781	1.0281	0.763299	0.907703	0.813149	1.31599	1.09738	0.933429	0.940289	0.891353	0.977105
1251	DATA	2852	18	64	ref|NM_023409|ens|ENSMUST00000021668|gb|AK209343|gb|AK165263	mm|chr12:86098006-86097947	0	NA	764	AGACCCGAAATGGAATCAGTGCCATATGATGAACAGAATTTCAAGAATGCTGTTTTATGC	2650	0	A_51_P347961	Npc2	NM_023409	ref|Mus musculus Niemann-Pick type C2 (Npc2), mRNA [NM_023409]	0.893312	0.0824296	1.16465	0.104463	3.53179	3	0	0	0	1.21001	0.812581	0.538197	0.834534	0.857867	0.987536	1.18078	1.26011	1.05306	1.01354	1.05306	1.19873
1265	DATA	2885	18	97	ens|ENSMUST00000084662|ens|ENSMUST00000037872|ens|ENSMUST00000098112|ref|XM_006538111	mm|chr4:42972193-42972252	0	NA	3197	AGATAGATAGAATAAAGATAGATAGATACAGGTGAAAGGTCCTGGCTGGGGACCTGGGCT	2713	0	A_55_P2058557	Dnajb5	ENSMUST00000084662	ens|DnaJ (Hsp40) homolog, subfamily B, member 5 [Source:MGI Symbol;Acc:MGI:1930018] [ENSMUST00000084662]	1.41155	0.468042	0.679012	0.142001	2.5941	2	0	0	0	0.681245	1.2192	0.592645	1.38462	0.957558	1.89248	0.839708	0.626898	0.570431	1.19292	0.804946	1.23735
1266	DATA	2886	18	98	ref|NM_001034895|ens|ENSMUST00000132174|gb|AK122438|gb|AK033649	mm|chr10:80714807-80714866	0	NA	3279	GGAGTCTGTAGAATCATCCAGAACTTGGCTAGGGTGGGGAATAAAGCAGATCTGCCCGTG	2715	0	A_55_P2053320	Zfr2	NM_001034895	ref|Mus musculus zinc finger RNA binding protein 2 (Zfr2), mRNA [NM_001034895]	1.12946	0.0420557	0.763349	0.311214	2.01924	2	0	0	0	1.02085	1.014	0.936827	1.15072	1.15665	1.08102	0.845303	1.02538	0.41936	0.923896	1.35832	1.06768
1267	DATA	2888	18	100	gb|AK135544|gb|AK037804|riken|6820447A03|riken|A130050O13	mm|chr16:31272084-31272025	0	NA	3231	GGCATATGCTCTTATGTTCTTCTTTTGATTGAATTAGTACTATTCCACTGAGTAGTTTCC	2719	0	A_51_P417257	Ppp1r2	AK135544	gb|Mus musculus 12 days embryo female mullerian duct includes surrounding region cDNA, RIKEN full-length enriched library, clone:6820447A03 product:protein phosphatase 1, regulatory (inhibitor) subunit 2, full insert sequence. [AK135544]	1.72641	0.680059	0.301542	0.521957	2.87882	3	0	0	0	1.06339	1.17723	0.518525	2.36589	1.80135	1.01198	0.000190401	0.904246	0.000190401	1.13844	0.935503	1.08306
1278	DATA	2919	18	131	ref|NM_001013366|ens|ENSMUST00000081214|ens|ENSMUST00000146968|gb|BC043682	mm|chr6:34830619-34830560	0	NA	2443	TACTCCCTGGAGACTAGAACCGTGGCTATAGCGGAGCATGCTCCAGAGCACAGGACTGAT	2776	0	A_66_P119884	Wdr91	NM_001013366	ref|Mus musculus WD repeat domain 91 (Wdr91), mRNA [NM_001013366]	1.07709	0.0853082	0.864506	0.0885647	2.99431	3	0	0	0	1.07089	0.994824	1.08218	1.14828	0.982534	1.10045	0.771611	0.873917	0.947989	1.07786	0.977884	0.971572
1283	DATA	2934	18	146	ref|NM_213659|ref|NM_213660|ref|NM_011486|ens|ENSMUST00000092671	mm|chr11:100749657-100749598	0	NA	2953	CACTCTGTGAGCTGATACCCCAGGCTGGGAACTCCTGGCTCTGCACTTTCAACCTTGCTA	2805	0	A_51_P201480	Stat3	NM_213659	ref|Mus musculus signal transducer and activator of transcription 3 (Stat3), transcript variant 1, mRNA [NM_213659]	1.17844	0.0584089	1.00811	0.0657933	3.35341	3	0	0	0	0.338818	1.0698	1.16382	1.22314	1.11235	1.19984	1.08347	0.962107	0.978749	0.943802	0.994796	0.9293
1287	DATA	2949	18	161	ref|NM_009484|ens|ENSMUST00000143958|ens|ENSMUST00000069309|ens|ENSMUST00000154666	mm|chrY:494463-494404	0	NA	2210	GAACTTAGAGAGTTCTGCCAGTGTTAATGTTGGCCTCAGACCTAGATCTCAAATCATACC	2834	0	A_55_P2735325	Uty	NM_009484	ref|Mus musculus ubiquitously transcribed tetratricopeptide repeat gene, Y chromosome (Uty), mRNA [NM_009484]	1.09725	0.265707	0.765345	0.0394437	2.14011	2	0	0	0	0.446374	0.772321	2.79688	0.813324	1.13851	1.33991	0.720745	0.779653	0.795639	0.820372	0.791548	0.784719
1292	DATA	2959	19	7	ens|ENSMUST00000122443|nap|NAP019092-001	mm|chr2:15403851-15403910	0	NA	312	GCCTATGAAAAGCTTCCAGAGCATGCTAAAATCAATGAAACTGATACATTTGGTTCTGGA	2851	0	A_55_P2141889	ENSMUST00000122443	ENSMUST00000122443	ens|predicted gene 13368 [Source:MGI Symbol;Acc:MGI:3651966] [ENSMUST00000122443]	0.856106	0.0733208	1.28262	0.148768	4.45411	2	0	0	0	1.21835	0.902144	0.986027	0.832954	0.938208	0.797156	1.24756	1.15451	1.44578	0.907041	0.639542	0.930728
1301	DATA	2977	19	25	ref|NM_026666|ens|ENSMUST00000052449|ref|XM_006521816|ref|XM_006521817	mm|chr16:5086316-5086375	0	NA	6392	GGGGGTGGTGTGGAAATTGTTAATCTTGTATAAAGCAACTCAATAAATTGTTTTGAGGTT	2886	0	A_55_P1960431	Ubn1	NM_026666	ref|Mus musculus ubinuclein 1 (Ubn1), mRNA [NM_026666]	1.09935	0.0612752	0.923068	0.0981472	2.63886	3	0	0	0	0.97788	1.07804	0.988162	1.03282	1.11175	1.15347	0.830439	0.912833	1.02593	0.922625	0.997604	0.968438
1307	DATA	2988	19	36	ref|NM_026221|ref|NM_001170433|ens|ENSMUST00000126774|ens|ENSMUST00000016631	mm|chr6:146946692-146946751	0	NA	1008	GAATTGGCATCTTTAAAAGAGCAACTGGAGGAGAAGGAATGTGAAGTAAAGAGGCTGCAG	2907	0	A_52_P443846	Ppfibp1	NM_026221	ref|Mus musculus PTPRF interacting protein, binding protein 1 (liprin beta 1) (Ppfibp1), transcript variant 2, mRNA [NM_026221]	1.16876	0.0843938	0.827948	0.16827	3.13576	2	0	0	0	1.12763	0.843686	1.38722	1.24764	1.07976	1.17888	0.994699	0.830946	0.658199	0.888372	0.843874	0.919099
1312	DATA	2997	19	45	ref|NM_001042675|ens|ENSMUST00000033995|ref|XM_011242127|gb|AK012265	mm|chr8:34914573-34914514	0	NA	934	TTTGTCACATATCAACCTACTGCAGACCAGCAGAGGGAGCTCCCGTGTTGAATTTATTAG	2924	0	A_55_P2097448	Rbpms	NM_001042675	ref|Mus musculus RNA binding protein gene with multiple splicing (Rbpms), transcript variant 3, mRNA [NM_001042675]	0.922739	0.0867872	1.11238	0.189971	1.57266	2	0	0	0	1.1266	1.2253	0.816173	0.96435	0.980886	0.822982	0.991262	1.01454	1.33132	0.79633	0.969408	0.960848
1314	DATA	3004	19	52	ref|NM_153806|ens|ENSMUST00000196338|ens|ENSMUST00000199449|ens|ENSMUST00000035776	mm|chr3:121987377-121987989	0	NA	2143	AAAGACGATTGTGGAAGAACTGCTGGCTGACTCTGAGTTCAGGAGATTTAATCGAAGGAA	2937	0	A_51_P426633	Dnttip2	NM_153806	ref|Mus musculus deoxynucleotidyltransferase, terminal, interacting protein 2 (Dnttip2), mRNA [NM_153806]	1.18358	0.199152	1.02147	0.030335	1.39381	2	0	0	0	0.884118	0.814043	0.904679	1.05868	1.07882	1.41325	1.05406	0.994055	1.01629	0.942863	0.929855	0.909294
1319	DATA	3017	19	65	ref|NM_019936|ens|ENSMUST00000024959|gb|AF151637|gb|AK008523	mm|chr17:87434906-87434965	0	NA	928	GACAAGTTGCATATTTTACTTAAATTTGCTGTTGACACTAAAGTCCAACATGTGACTGAG	2963	0	A_51_P353392	Cript	NM_019936	ref|Mus musculus cysteine-rich PDZ-binding protein (Cript), mRNA [NM_019936]	0.919153	0.118361	1.28816	0.164054	3.15942	3	0	0	0	1.00159	0.281643	0.603059	0.912318	0.804357	1.04078	1.23167	1.47299	1.15981	1.06564	1.16453	1.26161
1332	DATA	3048	19	96	ref|NM_013691|ens|ENSMUST00000136881|ens|ENSMUST00000153129|ens|ENSMUST00000126315	mm|chr3:89030522-89030581	0	NA	2945	ACCCAGATCCTGATCGGAGACCTTTGGCCATTGAACTCTGTTCTGGAGACCCTGGGGTCT	3020	0	A_51_P267053	Thbs3	NM_013691	ref|Mus musculus thrombospondin 3 (Thbs3), mRNA [NM_013691]	1.19393	0.204576	0.936067	0.0383352	2.14584	2	0	0	0	0.896269	1.00784	1.18549	1.14699	1.0169	1.41789	0.923853	0.97902	0.905326	0.793344	0.838631	0.888447
1347	Mean	3072	19	120	ref|NM_026007|ens|ENSMUST00000052248|ens|ENSMUST00000135025|gb|AK007869	mm|chr19:9052445-9052504	0	NA	1339	TTGGCAGGTGGACTATGAGTCGTATACATGGCGGAAACTGGATCCTGGGAGCGAGGAAAC	3068	0	A_52_P609138	Eef1g	NM_026007	ref|Mus musculus eukaryotic translation elongation factor 1 gamma (Eef1g), mRNA [NM_026007]	1.05915	0.017778	0.917895	0.0279075	7.39413	3	0	0	0	1.0282	0.914712	1.02011	1.047	1.0509	1.07956	0.885673	0.933633	0.934379	1.01136	1.06246	1.03203
1348	DATA	3074	19	122	ens|ENSMUST00000135098|gb|AK161770|riken|5830487F11	mm|chrX:54589201-54589142	0	NA	1180	ATCTTACCTGTTGAGTCATCTTGCCAGCCTGAGGCCATAAATTTGAAGGAGAGTGGAAAG	3072	0	A_55_P2719574	Arhgef6	ENSMUST00000135098	ens|Rac/Cdc42 guanine nucleotide exchange factor (GEF) 6 [Source:MGI Symbol;Acc:MGI:1920591] [ENSMUST00000135098]	1.18596	0.325034	0.655694	0.0759023	2.75169	2	0	0	0	0.959749	0.88164	1.10887	1.54287	1.10807	0.906958	0.605566	0.74302	0.618495	1.03139	1.41619	1.07718
1354	Mean	3087	19	135	ref|NM_024175|ens|ENSMUST00000182000|ens|ENSMUST00000118718|ens|ENSMUST00000161951	mm|chr13:91063336-91063974	0	NA	222	TTGTGCTGGAAAAAGTAGGGGTTGAGGCCAAACAGCCAAACTCTGCCATCAGGAAGTGTG	3096	0	A_55_P2033462	Rps23	NM_024175	ref|Mus musculus ribosomal protein S23 (Rps23), mRNA [NM_024175]	0.939344	0.0568541	1.05796	0.0808797	2.0782	3	0	0	0	1.14784	1.03359	0.927497	0.877249	0.951936	0.988846	0.99196	1.03375	1.14819	0.922105	0.982873	0.994179
1356	DATA	3092	19	140	ref|NM_146126|ens|ENSMUST00000110551|gb|AK152169|gb|AK166988	mm|chr2:122091013-122091072	0	NA	2198	ATCATGGCCCAGACCTGAGCTTTCTCAAACTGCTTCGCATAATAAACTGTTGATGGTGTC	3105	0	A_55_P1953301	Sord	NM_146126	ref|Mus musculus sorbitol dehydrogenase (Sord), mRNA [NM_146126]	0.870773	0.153726	1.07026	0.0612237	2.08817	2	0	0	0	1.43997	1.0479	0.869414	0.945306	0.973025	0.693989	1.04363	1.02687	1.14029	1.04305	0.870688	0.905862
1358	DATA	3096	19	144	ref|NM_178655|ens|ENSMUST00000182025|ens|ENSMUST00000183075|ens|ENSMUST00000044443	mm|chr3:126656131-126655417	0	NA	1988	TTGCAACTTAAACATCACCCTGCCAATTTATGCCAAGGAATCGGAGTCAGATCAAGAGCC	3110	0	A_55_P2729868	Ank2	NM_178655	ref|Mus musculus ankyrin 2, brain (Ank2), transcript variant 2, mRNA [NM_178655]	1.11009	0.111876	0.966518	0.0208952	2.18498	2	0	0	0	1.01538	0.967825	0.887908	1.08206	1.01489	1.23331	0.986456	0.944782	0.968315	1.00803	0.915855	0.975179
1359	DATA	3097	19	145	ref|NM_010221|ref|NM_001163481|ens|ENSMUST00000001595|gb|L07063	mm|chr11:100286080-100286139	0	NA	2528	CTCAAAGGCTAAACTGATCCAGTCCTTTCTCCTTTTGGTCAATAAAAGGCTAAACTGAAG	3112	0	A_55_P2089530	Fkbp10	NM_010221	ref|Mus musculus FK506 binding protein 10 (Fkbp10), transcript variant 1, mRNA [NM_010221]	0.779583	0.0994236	1.24929	0.0855743	6.20183	3	0	0	0	0.466837	1.38623	1.12153	0.748598	0.890809	0.699341	1.23986	1.33918	1.16882	1.03742	0.950925	0.95045
1364	DATA	3108	19	156	ref|NM_028451|ens|ENSMUST00000071487|ens|ENSMUST00000178636|ref|XM_006534334	mm|chr11:57872862-57872921	0	NA	3942	GAGACGCTGCTCACACCAGAAGAGACTATTGAAAGATGATTCATTTTATTTTTTCTCTGA	3130	0	A_65_P04602	Larp1	NM_028451	ref|Mus musculus La ribonucleoprotein domain family, member 1 (Larp1), mRNA [NM_028451]	1.20672	0.0432892	0.904229	0.024071	10.5776	3	0	0	0	0.695707	0.918486	1.06675	1.17358	1.19088	1.25569	0.931982	0.891684	0.889023	0.921622	1.10154	0.96306
1370	Mean	3133	20	17	ens|ENSMUST00000105067	mm|chr11:99571454-99571395	0	NA	81	ACCTGCTGCCGCCCCTGCTGCTGCCAGCCCTGCTGCTGTGGGTCCAACTGCTGCCAGTCT	2871	0	A_55_P1963578	ENSMUST00000105067	ENSMUST00000105067	ens|predicted gene 14193 [Source:MGI Symbol;Acc:MGI:3651818] [ENSMUST00000105067]	0.901131	0.0662168	1.12924	0.106613	3.14814	3	0	0	0	1.12752	0.983614	1.01849	0.842203	0.888401	0.972788	1.11543	1.03021	1.24209	0.927561	0.864112	0.98758
1384	DATA	3157	20	41	ref|NM_177192|ens|ENSMUST00000111557|ref|XM_006507062|ref|XM_006507063	mm|chr6:148936684-148936625	0	NA	9739	CAGACAAACTGACATGGGTTTTCAGGTTTTGGAGTACATTTAAATATGACTTTTCATGCT	2918	0	A_55_P2081585	Dennd5b	NM_177192	ref|Mus musculus DENN/MADD domain containing 5B (Dennd5b), mRNA [NM_177192]	1.25555	0.105846	0.831816	0.121935	4.54537	3	0	0	0	0.951727	0.830191	1.01996	1.20433	1.18505	1.37726	0.876602	0.925025	0.693822	0.905317	1.0134	1.01732
1389	DATA	3167	20	51	ens|ENSMUST00000178429|ref|XM_011244861	mm|chr14:6772278-6772337	0	NA	0	AAACTATTTTGGCTGCTCAGGCTATGTCAGAAAGAGAATGGCGATGAAGGAGAGACCAGA	2936	0	A_55_P1999972	ENSMUST00000178429	ENSMUST00000178429	ens|predicted gene 3187 [Source:MGI Symbol;Acc:MGI:3781366] [ENSMUST00000178429]	1.19629	0.356929	0.642835	0.0826271	2.61654	2	0	0	0	0.860706	0.770294	1.48116	1.49838	1.28807	0.80244	0.587488	0.737812	0.603205	0.925521	1.13052	1.31441
1390	DATA	3168	20	52	ref|NM_007780|ens|ENSMUST00000096355|ref|XM_006520387|ref|XM_006520388	mm|chr15:78176856-78177118	0	NA	1625	CCTCACCTTGCTCCTGATCCTTCGCTTTGGCTGTGTCTCTGTATACAGGACGTACAGGAA	2938	0	A_52_P664853	Csf2rb	NM_007780	ref|Mus musculus colony stimulating factor 2 receptor, beta, low-affinity (granulocyte-macrophage) (Csf2rb), mRNA [NM_007780]	0.8486	0.104461	1.20737	0.213224	2.61713	2	0	0	0	0.653319	0.696229	1.13468	0.73224	0.879262	0.934298	1.4535	1.08953	1.07907	1.14691	1.11341	1.08754
1398	DATA	3182	20	66	ref|NM_029398|ref|NM_001290679|ens|ENSMUST00000027065|ref|XM_006495579	mm|chr1:21220180-21220239	0	NA	1099	TCTATTCTCAGCACATCAGCATCCTGACACAATGCACTCAGTGTTGAAATAAAATGCATC	2966	0	A_51_P422893	Tmem14a	NM_029398	ref|Mus musculus transmembrane protein 14A (Tmem14a), transcript variant 2, mRNA [NM_029398]	0.81559	0.0746793	1.24894	0.120887	5.28233	3	0	0	0	1.11528	0.964387	0.660156	0.826767	0.735952	0.884051	1.14322	1.22286	1.38074	1.15719	0.974167	0.935221
1400	DATA	3185	20	69	ref|NM_181545|ref|NM_001167743|ens|ENSMUST00000038141|ens|ENSMUST00000108152	mm|chr11:82815863-82815804	0	NA	3807	GAAGGACATAAATAATTCCCTTAAAGAAATACAGGGACAGGAGGGATGGCTTAGTGGTTA	2972	0	A_55_P2117656	Slfn8	NM_181545	ref|Mus musculus schlafen 8 (Slfn8), transcript variant 1, mRNA [NM_181545]	1.07689	0.119642	0.829151	0.0861126	2.91094	3	0	0	0	0.884069	0.988382	1.26896	0.997303	1.01889	1.21448	0.856355	0.898375	0.732721	0.941346	0.992869	1.20625
1403	DATA	3193	20	77	ref|NM_010308|ens|ENSMUST00000034198	mm|chr8:96493228-96493287	0	NA	2887	CTGCCAGCCTACTTCTCTAATGGATTCCTGTGTAGCTCAATAAAGAGAATGTTTGTCTGT	2986	0	A_55_P2096144	Gnao1	NM_010308	ref|Mus musculus guanine nucleotide binding protein, alpha O (Gnao1), transcript variant A, mRNA [NM_010308]	1.29291	0.155122	0.919373	0.118803	3.31128	3	0	0	0	0.616367	0.752408	0.69699	1.25792	1.46254	1.15827	0.965732	0.78438	1.00801	1.09628	1.24122	0.959871
1406	DATA	3200	20	84	ref|NM_001081055|ens|ENSMUST00000000384|gb|BY592377|tc|TC1613320	mm|chr10:77649580-77649521	0	NA	4937	AAGTTGCACCAAAAATCAAGGACAAAATAAATGTGTGTTTGTTTTTACTGGTGTGGAAGT	2999	0	A_66_P138765	Trappc10	NM_001081055	ref|Mus musculus trafficking protein particle complex 10 (Trappc10), mRNA [NM_001081055]	0.811917	0.116557	1.33936	0.467076	1.89771	2	0	0	0	0.855521	0.533366	1.0307	0.783698	0.939993	0.71206	1.08864	1.05118	1.87826	1.03983	1.03181	1.05495
1408	DATA	3204	20	88	ref|NM_001033140|gb|AK155437|gb|AK002462|tc|TC1601584	mm|chr7:31106653-31106594	0	NA	741	AGACTTTTTGCCGCGCTCGTTTAATAGAATACCCTGATGAACCGTGAGAAACTTGGCAGT	3007	0	A_51_P338728	Sdhaf1	NM_001033140	ref|Mus musculus succinate dehydrogenase complex assembly factor 1 (Sdhaf1), mRNA [NM_001033140]	0.885533	0.0356583	1.18379	0.129468	3.84684	2	0	0	0	0.939364	0.991842	0.804685	0.858738	0.871857	0.926005	1.08583	1.13497	1.33057	1.00806	0.998044	1.05005
1410	DATA	3210	20	94	ref|NM_172484|ref|NM_001081756|ref|NM_176957|ens|ENSMUST00000112583	mm|chr1:127810468-127810409	0	NA	6818	TTTATAATTCCTTCTGTACAGAAGCCTACAGACCAGGCAGACTAGAGCTATGTTTAGGAT	3018	0	A_51_P379478	Nckap5	NM_172484	ref|Mus musculus NCK-associated protein 5 (Nckap5), transcript variant 2, mRNA [NM_172484]	1.21445	0.126521	0.746673	0.131184	4.44552	3	0	0	0	0.617019	1.1003	0.372173	1.06842	1.2911	1.28384	0.663423	0.897894	0.678703	1.25686	1.50096	1.26931
1411	DATA	3214	20	98	ref|NM_026174|ens|ENSMUST00000184973|ens|ENSMUST00000185072|ref|XM_003688928	mm|chr14:69984685-69984744	0	NA	2969	AAGCCCACACCGTGGAAGAGCCTGAATTTAAAATAAGAAATAAATGCACACGTTGAAAAC	3025	0	A_55_P1992505	Entpd4	NM_026174	ref|Mus musculus ectonucleoside triphosphate diphosphohydrolase 4 (Entpd4), mRNA [NM_026174]	1.22029	0.308335	0.792362	0.244897	1.88237	3	0	0	0	0.832215	0.916333	1.04901	1.03475	1.04991	1.57622	0.87644	0.984145	0.516502	0.995638	1.07079	1.09805
1414	DATA	3219	20	103	ref|NM_008831|ens|ENSMUST00000125172|ens|ENSMUST00000122108|gb|AK152933	mm|chr11:95541283-95541342	0	NA	994	AATCACTGTGAAATTTCATGATTGGCTTAAAGTGAAGGAAATAAAGGTAAAATCACTTCA	3035	0	A_55_P2145908	Phb	NM_008831	ref|Mus musculus prohibitin (Phb), mRNA [NM_008831]	1.27649	0.188821	0.897984	0.276613	1.95747	3	0	0	0	0.840457	0.766627	0.518064	1.11242	1.23416	1.48288	1.03266	1.08146	0.579824	1.1502	1.14653	1.0547
1420	DATA	3233	20	117	ref|NM_146706|ref|NM_146707|ens|ENSMUST00000079827|ens|ENSMUST00000052254	mm|chr11:73935624-73935683	0	NA	831	GGTATTTTCAACACTGTCATCAACCCTATGCTAAACCCACTCATCTACAGTCTTAGGAAC	3063	0	A_55_P2098170	Olfr401	NM_146706	ref|Mus musculus olfactory receptor 401 (Olfr401), mRNA [NM_146706]	0.00109393	0	0.634147	1.09648	1	2	0	0	0	1.60125	1.0767	6.22175	0.00109393	0.00109393	0.00109393	0.00109393	1.90025	0.00109393	0.00109393	1.19239	0.00109393
1423	DATA	3237	20	121	ref|NR_004411|gb|M10945|gb|AK134035|gb|FM991912	mm|chr3:96292678-96292738	0	NA	26	TGATCACGAAGGTGGTTTTCCCAGGGCGAGGCTTATCCATTGCACTCCGGATGTGCTGAC	3071	0	A_55_P2723769	Rnu1a1	NR_004411	ref|Mus musculus U1a1 small nuclear RNA (Rnu1a1), small nuclear RNA [NR_004411]	1.12147	0.0679719	0.901421	0.0634967	4.09754	3	0	0	0	0.747717	1.02818	1.16989	1.15411	1.04334	1.16697	0.914377	0.832446	0.957441	1.04155	1.05472	0.889269
1433	DATA	3260	20	144	ens|ENSMUST00000119135	mm|chr7:48746862-48746921	0	NA	1141	TTTGAGAACATGGGTGCATACACCATTGCTGCTGCTTCTACTTTCAATGGGTTCCAATGG	3111	0	A_55_P1998797	ENSMUST00000119135	ENSMUST00000119135	ens|predicted gene 15470 [Source:MGI Symbol;Acc:MGI:3641891] [ENSMUST00000119135]	0.916797	0.153393	1.12847	0.0574845	2.23809	2	0	0	0	1.03413	1.28734	0.855072	0.741517	0.982374	1.0265	1.19447	1.10159	1.08934	0.765429	0.916759	1.00548
1436	DATA	3264	20	148	ref|NM_183106|ens|ENSMUST00000111238|ens|ENSMUST00000111237|ens|ENSMUST00000055081	mm|chr2:94141004-94140945	0	NA	4509	GAGAATCAAAAACTCCAACATTTTGGATTCTTTACGGGCACATCCTGAGAACAAAAATAA	3118	0	A_55_P1996553	Ttc17	NM_183106	ref|Mus musculus tetratricopeptide repeat domain 17 (Ttc17), mRNA [NM_183106]	1.1278	0.0123089	1.03169	0.092745	1.77923	2	0	0	0	0.4202	0.945691	0.981677	1.14153	1.12408	1.11778	1.05248	0.930314	1.11228	1.04137	1.12392	1.00869
1437	DATA	3265	20	149	ref|NM_001110017|ref|NM_027341|ens|ENSMUST00000133377|ens|ENSMUST00000114516	mm|chr16:48948582-48948523	0	NA	2294	AATAAAGATGTAGCCTCGATACCTAGTGAATCTTCAACAGAATCTGTTAAAGATCTTCAG	3120	0	A_52_P513477	Dzip3	NM_001110017	ref|Mus musculus DAZ interacting protein 3, zinc finger (Dzip3), transcript variant 1, mRNA [NM_001110017]	1.17931	0.0427364	0.936233	0.108565	3.60854	2	0	0	0	0.502529	0.782845	0.927308	1.1787	1.22235	1.13688	1.06156	0.871201	0.875936	1.03635	1.44001	0.964322
1438	DATA	3270	20	154	ens|ENSMUST00000044113|gb|AK075904|gb|AK148725|tc|TC1652695	mm|chr15:72929194-72929135	0	NA	10784	ATCTGTGTGACGACGTCTTGTGCTTGCGGTTTAGAAACCACGCAGTGCTGTTTTGTAAAT	3127	0	A_51_P166107	Ago2	ENSMUST00000044113	ens|argonaute RISC catalytic subunit 2 [Source:MGI Symbol;Acc:MGI:2446632] [ENSMUST00000044113]	1.12944	0.0505158	0.975154	0.0798669	2.82776	3	0	0	0	0.632064	0.971899	0.960919	1.09558	1.10523	1.1875	0.993036	1.04456	0.887862	0.948998	1.0777	1.09464
1446	DATA	3283	21	3	ref|NM_029736|ref|NM_001282108|ref|NM_001009981|ref|NR_104094	mm|chr8:81055014-81102633	0	NA	599	TGTCTTCTGCCGTGATTTTAACCAAGGCAGTTGGTGGAAATGAGGCAGCTGCGATATTTA	3150	0	A_52_P158546	Slc10a7	NM_029736	ref|Mus musculus solute carrier family 10 (sodium/bile acid cotransporter family), member 7 (Slc10a7), transcript variant a, mRNA [NM_029736]	0.978975	0.852615	0.00120189	0	1.9863	2	0	0	0	1.76778	1.89398	1.09673	1.56747	1.36825	0.00120189	0.00120189	0.00120189	0.00120189	2.56905	1.73073	0.00120189
1455	DATA	3315	21	35	ref|NM_001081228|ens|ENSMUST00000099995|gb|BC157934|gb|BC172090	mm|chr2:75814348-75814289	0	NA	1888	CCTGCTGTCATAGAACAGCCCTTGGAGGAAGAAAGAATGCACATTGGAAAAAATACAGTC	3208	0	A_55_P2080378	Ttc30a2	NM_001081228	ref|Mus musculus tetratricopeptide repeat domain 30A2 (Ttc30a2), mRNA [NM_001081228]	0.64221	0.198339	1.74372	0.28109	5.54583	3	0	0	0	1.13435	0.38063	0.811019	0.484242	0.8648	0.577587	1.91356	1.89834	1.41927	0.78833	0.92612	0.801757
1460	DATA	3326	21	46	gb|AK137811|gb|AK087984|tc|TC1599645|riken|A130015C10	mm|chr10:57882243-57882302	0	NA	1813	CTTCAAACAAGAGAACTAGTCTCACTAAAGGAGGAATCATATATTTTAAGCTTTTGCCAC	3226	0	A_52_P206836	AK137811	AK137811	gb|Mus musculus 16 days neonate thymus cDNA, RIKEN full-length enriched library, clone:A130015C10 product:LIM and senescent cell antigen-like domains 1, full insert sequence. [AK137811]	1.65444	0.417995	0.481235	0.418097	3.43711	3	0	0	0	0.946076	0.663381	0.882065	1.92881	1.86113	1.17336	0.684813	0.758553	0.000338388	1.08453	1.01206	1.00487
1467	DATA	3342	21	62	ref|NM_178743|ens|ENSMUST00000151612|ens|ENSMUST00000050880|ref|XM_006533421	mm|chr11:119241942-119242001	0	NA	2243	AAGAGATTGGGCATCTCGGAGATGTGTCTGACCATGTCATGAAGTCTAATCTGAGCTGAA	3254	0	A_55_P2743872	Slc26a11	NM_178743	ref|Mus musculus solute carrier family 26, member 11 (Slc26a11), mRNA [NM_178743]	1.10047	0.102484	0.724774	0.138434	3.77801	3	0	0	0	1.13044	1.05938	1.0635	1.21266	1.077	1.01176	0.742391	0.853557	0.578375	0.989797	1.12222	1.15892
1471	DATA	3354	21	74	ref|NM_001270609|ens|ENSMUST00000180436|nap|NAP058702-1	mm|chr1:137947888-137947947	0	NA	507	TCCAGTGGATCCCCCTTTTCCTCGTCGCCTTTTTTGGAGTCGGAGGAACCCAGCCTTTGA	3275	0	A_55_P2481223	Ascl5	NM_001270609	ref|Mus musculus achaete-scute complex homolog 5 (Drosophila) (Ascl5), mRNA [NM_001270609]	0.69115	0.184343	1.58687	0.598001	2.47923	2	0	0	0	0.359049	0.459481	0.886266	0.529213	0.652474	0.891763	2.2744	1.29858	1.18762	1.49447	0.90623	1.06045
1474	DATA	3363	21	83	ref|NM_016850|ref|NM_001252601|ref|NM_001252600|ens|ENSMUST00000127223	mm|chr7:148451014-148450664	0	NA	796	GCATAAGGTGTACGAACTTAGCCGGGAGCTTGGATCTACTGTGGGCCCAGCCACGGAAAA	3289	0	A_51_P421876	Irf7	NM_016850	ref|Mus musculus interferon regulatory factor 7 (Irf7), transcript variant 1, mRNA [NM_016850]	0.682856	0.249547	1.22937	0.104221	3.50022	2	0	0	0	1.29597	1.62654	1.02352	0.727851	0.906845	0.413873	1.18077	1.34901	1.15832	0.594639	0.827804	0.894853
1476	DATA	3372	21	92	ref|NM_001167593|ens|ENSMUST00000165133|gb|BC089513|gb|AK133300	mm|chr13:59816739-59816798	0	NA	369	AGATCCCCTCTTGCCTGTGTGTGATAGATCTGGCAATATCAGTCATCAGCTCTCCCAGGA	3305	0	A_55_P2080592	Spata31d1b	NM_001167593	ref|Mus musculus spermatogenesis associated 31 subfamily D, member 1B (Spata31d1b), mRNA [NM_001167593]	0.660188	0.0385677	1.79072	0.505012	3.86614	2	0	0	0	0.659383	0.408324	0.517886	0.679578	0.685214	0.615773	2.1966	1.95037	1.22517	0.8143	1.11521	1.13218
1478	DATA	3376	21	96	ref|XM_006496170|gb|AK054546|gb|BG404117|tc|TC1613381	mm|chr1:74647433-74647374	0	NA	521	AGCTCTCCTATTCTCTCGAGCATTCTTAATAAGAAACCAAAAGCCTTTAAAGACTTTGGG	3313	0	A_52_P596360	Rnf25	XM_006496170	ref|PREDICTED: Mus musculus ring finger protein 25 (Rnf25), transcript variant X2, mRNA [XM_006496170]	1.18222	0.181721	0.734291	0.171109	3.1083	3	0	0	0	0.940885	1.08739	1.25424	1.37963	1.14512	1.02191	0.620799	0.931102	0.650972	0.867026	1.11921	0.981713
1486	DATA	3397	21	117	ens|ENSMUST00000156763	mm|chr2:93846520-93846461	0	NA	845	TCTCCTGCCTCTCACTTTCCACCTGATGTAAATAAATCATCAGTATGAACTATCCTTTTA	3353	0	A_55_P2594671	Alkbh3	ENSMUST00000156763	ens|alkB, alkylation repair homolog 3 (E. coli) [Source:MGI Symbol;Acc:MGI:1916363] [ENSMUST00000156763]	0.775354	0.154986	1.27824	0.334708	2.36146	2	0	0	0	1.09028	0.853021	0.902613	0.693794	0.678179	0.95409	1.66153	1.12955	1.04364	0.986755	0.964295	1.04225
1490	DATA	3405	21	125	ref|XM_890719|nap|NAP114914-1|nap|NAP114782-1|nap|NAP095021-001	mm|chr12:088879238-088879297	0	NA	412	GTGGAGAAAGTGCTTAAGAGTCCACTATGAGGGGAAACATTTCATTCTCAAAAAATTTTT	3368	0	A_55_P1985464	Gm12271	XM_890719	ref|PREDICTED: Mus musculus predicted gene 12271 (Gm12271), mRNA [XM_890719]	0.884775	0.0334572	1.09349	0.0404956	6.88202	3	0	0	0	1.13949	1.04272	1.0284	0.857125	0.875232	0.921966	1.06437	1.07636	1.13973	0.915605	0.978366	0.960626
1491	DATA	3409	21	129	ref|NM_001081047|ens|ENSMUST00000124181|ens|ENSMUST00000144504|ens|ENSMUST00000030645	mm|chr4:133789080-133788934	0	NA	976	CTGCCCCTGAACCCACCGTCTCCCAGGGTTCCGTCTGAAGGTCTTTTAGCAGATGGAACT	3376	0	A_66_P127717	Cnksr1	NM_001081047	ref|Mus musculus connector enhancer of kinase suppressor of Ras 1 (Cnksr1), mRNA [NM_001081047]	0.86443	0.023808	1.19061	0.279335	2.01523	2	0	0	0	0.89891	0.78306	1.09334	0.846776	0.855007	0.891508	1.48234	1.16392	0.925583	0.937835	1.06692	1.0548
1503	DATA	3434	21	154	ref|NM_031183|ens|ENSMUST00000107622|ens|ENSMUST00000047997|ref|XM_006534531	mm|chr11:96885252-96885311	0	NA	2574	TGTGTGTATGCGTGTGTTGTCTGCACCTGTATGTGTGCATGTATGTGTTTCTCTACTGAG	3422	0	A_55_P2070441	Sp6	NM_031183	ref|Mus musculus trans-acting transcription factor 6 (Sp6), mRNA [NM_031183]	0.702739	0.267149	1.45712	0.447504	2.50704	3	0	0	0	1.8477	0.865805	0.270651	0.424572	0.957303	0.726341	1.37045	1.05928	1.94161	0.635515	0.807359	1.09341
1504	DATA	3436	21	156	ens|ENSMUST00000160038|ens|ENSMUST00000159850|tc|TC1635148|nap|NAP105009-1	mm|chr14:102331868-102331927	0	NA	381	GACTGCTATCTCCGATTCAAATGTAAGAGAGCAAATCAGAGAGAAAATTTCTTGTCTTTT	3426	0	A_65_P10947	Lmo7	ENSMUST00000160038	ens|LIM domain only 7 [Source:MGI Symbol;Acc:MGI:1353586] [ENSMUST00000160038]	0.635402	0.12158	1.39274	0.0504456	9.96545	2	0	0	0	0.964509	0.965384	0.732371	0.569694	0.775697	0.560815	1.41024	1.33588	1.43211	1.10689	1.17491	0.971508
1509	DATA	3449	22	5	ref|NM_025823|ens|ENSMUST00000032065|ref|XM_006506486|gb|AK004840	mm|chr6:86337145-86337086	0	NA	3145	CAAGGAATAAAAATCAAAACTCTTCACCAGGTTATAGCGTTGCTTCAATAAAGCGGTCTT	3154	0	A_55_P2156293	Pcyox1	NM_025823	ref|Mus musculus prenylcysteine oxidase 1 (Pcyox1), mRNA [NM_025823]	0.792193	0.135774	1.22462	0.284291	2.37737	2	0	0	0	1.20412	0.917351	0.944124	0.78218	0.932696	0.661703	1.07815	1.04343	1.55228	0.969536	0.916426	0.997996
1515	DATA	3457	22	13	gb|AK169958|gb|AK030491|riken|F630005K06|riken|5330418N22	mm|chr15:67006477-67006418	0	NA	1812	TACTAAATTAAAATTCATCCAGTGACTTCCAGGAGAGCGCTGAGCACCCACCCTGCTAAA	3169	0	A_55_P2935850	St3gal1	AK169958	gb|Mus musculus NOD-derived CD11c +ve dendritic cells cDNA, RIKEN full-length enriched library, clone:F630005K06 product:hypothetical Retroviral integrase, C-terminal containing protein, full insert sequence. [AK169958]	0.912024	0.189151	0.599983	0.232866	1.80152	3	0	0	0	1.45648	1.4304	1.18773	1.12536	0.764814	0.845897	0.331186	0.728238	0.740526	0.950553	1.13986	1.29896
1539	DATA	3513	22	69	ref|NM_133872|ens|ENSMUST00000116273|ref|XM_006539329|ref|XM_006539330	mm|chr4:136106565-136106506	0	NA	2897	GAGAAGCAAGTGGTGTGAGATAACCTCTTAGTCTATGGTGTTTGTTTGTTTTTGTTTTTT	3267	0	A_55_P1993820	Kdm1a	NM_133872	ref|Mus musculus lysine (K)-specific demethylase 1A (Kdm1a), mRNA [NM_133872]	0.88563	0.143299	1.07988	0.113956	1.83765	3	0	0	0	1.08051	0.664579	1.22072	0.930967	1.00078	0.725146	1.00303	1.21081	1.0258	1.03861	1.08809	1.01096
1542	Mean	3522	22	78	ens|ENSMUST00000118644|ens|ENSMUST00000077111|ens|ENSMUST00000120821|ens|ENSMUST00000117199	mm|chrX:154687171-154687230	0	NA	442	GATATTGAACTTGTTTCAAATTCAGCTGCCCTGATTCAGCAAGCCACAACACTTAAAAAC	3282	0	A_55_P2022116	ENSMUST00000118644	ENSMUST00000118644	ens|predicted gene 8662 [Source:MGI Symbol;Acc:MGI:3645694] [ENSMUST00000118644]	0.939333	0.0280304	1.0505	0.0112961	6.37155	2	0	0	0	1.16754	1.05866	0.893497	0.906968	0.955225	0.955806	1.04236	1.04575	1.0634	0.934269	0.93332	1.04321
1552	DATA	3542	22	98	gb|AK040596|riken|A430108E01|nap|NAP116687-1	mm|chr8:19791989-19792048	0	NA	2194	TGAAATGACAATCAGACACACGCAAGAGAGGTGTTGAATCTGAATGTAATGTTCTGGTTG	3318	0	A_55_P2073905	AK040596	AK040596	gb|Mus musculus 0 day neonate thymus cDNA, RIKEN full-length enriched library, clone:A430108E01 product:unclassifiable, full insert sequence. [AK040596]	1.21961	0.112197	0.546564	0.23257	4.51457	2	0	0	0	0.829837	1.35425	0.570389	1.24842	1.31459	1.09582	0.400369	0.814749	0.424575	1.28679	1.64588	1.01434
1554	DATA	3547	22	103	ref|NM_133847|ens|ENSMUST00000089027|ens|ENSMUST00000152807|ens|ENSMUST00000149390	mm|chr2:153034448-153034506	0	NA	2143	TACATGTTTTTCCCCAAGATATATGCTGCTGTGAAGATAGACTGAGTGGGTGGACCAACC	3328	0	A_55_P2805379	Tm9sf4	NM_133847	ref|Mus musculus transmembrane 9 superfamily protein member 4 (Tm9sf4), mRNA [NM_133847]	1.31118	0.264864	0.888107	0.274703	1.92033	3	0	0	0	0.846864	0.689379	0.858403	1.15143	1.1652	1.61692	1.10419	0.981172	0.578961	0.960014	1.0412	1.00627
1565	DATA	3570	22	126	gb|AK163576|tc|TC1663468|riken|B230388L24	mm|chr19:17268178-17268237	0	NA	830	ATTTTGGCAAGAGACCCAGCAGAGGGCAAAGTGTGTCTTGTATTTCCAGTGTTTTACCTG	3371	0	A_55_P2737887	Prune2	AK163576	gb|Mus musculus adult male corpora quadrigemina cDNA, RIKEN full-length enriched library, clone:B230388L24 product:hypothetical protein, full insert sequence. [AK163576]	1.3176	0.295321	0.575375	0.323952	2.93269	3	0	0	0	0.853047	0.975432	1.24441	1.60759	1.32799	1.01722	0.260392	0.558129	0.907606	0.995663	1.45038	0.802136
1567	DATA	3573	22	129	ens|ENSMUST00000118838|ref|XM_011243931|ref|XM_011244364|nap|NAP000009-001	mm|chr13:28929437-28929496	0	NA	693	GGCTAAGCTTGTGGAAGCTATTAGGACCAATTATAATGACATATATGATAAGATTCGTTG	3377	0	A_66_P111840	ENSMUST00000118838	ENSMUST00000118838	ens|predicted gene 11362 [Source:MGI Symbol;Acc:MGI:3651391] [ENSMUST00000118838]	0.761223	0.243493	1.14726	0.0781734	2.61461	2	0	0	0	1.15959	0.961501	0.986256	0.918203	0.884739	0.480726	1.09139	1.1138	1.2366	1.05499	1.08332	1.02887
1571	DATA	3578	22	134	ref|XM_011247059|ref|XM_011251649|ref|XR_386126|ref|XR_397870	mm|chr18:26904535-26904594	0	NA	1244	GATGTGGCATCCAGCAGCGGACAAAATTCCAAGTGAGGAAATGATCAAATCTTAACATCA	3387	0	A_55_P2562593	Gm33437	XM_011247059	ref|PREDICTED: Mus musculus predicted gene, 33437 (Gm33437), transcript variant X1, mRNA [XM_011247059]	0.360447	0.622533	0.00102691	0	1	2	0	0	0	7.22049	1.52753	0.73296	0.00102691	0.00102691	1.07929	0.00102691	0.00102691	0.00102691	1.43254	0.00102691	0.00102691
1572	DATA	3579	22	135	gb|AK019690|gb|BC065392|ens|ENSMUST00000100937|tc|TC1591823	mm|chr5:110167984-110167925	0	NA	288	CCAGAAGACATGGAAGGTAATCTTCATGTTCAAGTTGGTATGGATATGCTTATAAAGAAA	3389	0	A_55_P2032318	4930522L14Rik	AK019690	gb|Mus musculus adult male testis cDNA, RIKEN full-length enriched library, clone:4930522L14 product:similar to KRUPPEL-RELATED ZINC FINGER PROTEIN F80-L [Mus musculus], full insert sequence. [AK019690]	0.602226	0.275865	1.01149	0.0781869	2.47223	2	0	0	0	2.48897	1.13309	0.892142	0.765719	0.757237	0.283723	0.939309	1.00061	1.09454	0.945143	0.876434	0.823074
1573	DATA	3580	22	136	gb|AK076271|tc|TC1616665|riken|4632406J10|nap|NAP001303-003	mm|chr9:61770788-61770729	0	NA	2861	GCTCTGCCTCATGCAAGGGTGCTTAAATGAACTCAATTTATATTTCTTCAGTATTGATAA	3391	0	A_55_P2732276	Kif23	AK076271	gb|Mus musculus 0 day neonate skin cDNA, RIKEN full-length enriched library, clone:4632406J10 product:kinesin-like 5 (mitotic kinesin-like protein 1), full insert sequence. [AK076271]	0.678259	0.091423	1.20796	0.267406	3.24647	2	0	0	0	1.33083	0.980705	0.883566	0.679287	0.586327	0.769164	1.49038	0.958646	1.17485	1.12456	1.05483	0.966867
1577	DATA	3584	22	140	ref|NM_008361|ens|ENSMUST00000028881|ref|XM_006498795|gb|BC013644	mm|chr2:129190406-129190347	0	NA	1236	AGGTTCCTATAATATGGATGAGAATTTTTATGAATGAAGCACCAGCACATTGCTTTGATG	3398	0	A_51_P212782	Il1b	NM_008361	ref|Mus musculus interleukin 1 beta (Il1b), mRNA [NM_008361]	2.7243	0.460458	0.534931	0.472306	5.74894	3	0	0	0	1.01074	0.742991	0.46679	2.42806	3.25479	2.49006	0.896628	0.707571	0.000592812	0.000592812	0.000592812	0.000592812
1580	DATA	3591	22	147	ens|ENSMUST00000119183	mm|chr2:21990925-21990984	0	NA	1472	TTTCCTACCAAACCTCCATGGTGTCTGATGGAGAGCCCTGGCACATCATGGGCCTCTCCT	3411	0	A_55_P2186929	ENSMUST00000119183	ENSMUST00000119183	ens|predicted gene 13337 [Source:MGI Symbol;Acc:MGI:3650269] [ENSMUST00000119183]	0.855606	0.165779	1.5051	0.41325	2.52649	2	0	0	0	0.865231	1.07378	0.653904	1.02612	0.845687	0.695009	1.59441	1.86639	1.05449	1.19798	0.714175	0.412819
1585	DATA	3614	23	6	gb|AK149285|riken|A930011C01	mm|chr14:24344143-24344084	0	NA	2074	GCCAGCATCTCCTTATCCCTGTCCCCCAATGAAGTCAATAAAATCAATTGCTTTGAAATC	3452	0	A_55_P2736300	Kcnma1	AK149285	gb|Mus musculus adult retina cDNA, RIKEN full-length enriched library, clone:A930011C01 product:potassium large conductance calcium-activated channel, subfamily M, alpha member 1, full insert sequence. [AK149285]	0.752035	0.122703	1.34139	0.392884	2.48008	2	0	0	0	0.998924	0.922503	0.885314	0.822764	0.822991	0.61035	1.15965	1.07228	1.79224	1.02775	0.869683	1.01555
1597	DATA	3639	23	31	gb|BC011338|tc|TC1589149	mm|chr9:7856221-7856162	0	NA	2559	ACAGATAATGCCCAGCTAATAGAACAGGGTCTGAAGGAGAACGTGAAGAGACAACTGTCT	3500	0	A_52_P434055	Birc3	BC011338	gb|Mus musculus baculoviral IAP repeat-containing 3, mRNA (cDNA clone MGC:18386 IMAGE:3661563), complete cds. [BC011338]	1.78452	0.648969	0.189958	0.328294	3.79751	2	0	0	0	1.16276	0.782471	0.838089	2.51253	1.26669	1.57433	0.000417133	0.569038	0.000417133	1.05152	1.18605	1.05569
1603	DATA	3652	23	44	ref|NM_198005|ref|NM_001165981|ens|ENSMUST00000102701|ens|ENSMUST00000064141	mm|chr2:70922580-70924643	0	NA	1329	AAACCAAGTCAAAGTCTTGAAGCTAAGTGAGGTAGAAAATGATAGTTCTCAGCATCAGAT	3525	0	A_52_P633269	Dcaf17	NM_198005	ref|Mus musculus DDB1 and CUL4 associated factor 17 (Dcaf17), transcript variant 3, mRNA [NM_198005]	1.76422	0.382476	0.207548	0.35878	5.14143	3	0	0	0	1.24333	0.690849	1.02985	1.45664	1.64356	2.19248	0.000405984	0.621832	0.000405984	0.917862	0.835988	1.36681
1606	DATA	3658	23	50	ref|NM_172554|ens|ENSMUST00000041723|ref|XM_006513762|ref|XM_006513761	mm|chr10:110380689-110380630	0	NA	2696	GTTACTGTCCAGTGAAGCATAAATTAGGATTTAATTTCATGTGCAAGACAGCCCAATTTT	3534	0	A_55_P2805666	Zdhhc17	NM_172554	ref|Mus musculus zinc finger, DHHC domain containing 17 (Zdhhc17), mRNA [NM_172554]	1.19988	0.0765677	1.00611	0.0416661	3.85019	3	0	0	0	0.929434	0.574693	0.572548	1.14957	1.16207	1.288	0.987267	0.977193	1.05387	1.14957	1.13726	1.01852
1615	DATA	3680	23	72	ref|NM_145563|ref|NR_040366|ens|ENSMUST00000170826|ens|ENSMUST00000146564	mm|chr5:110436279-110437653	0	NA	238	CAATTGGGAAGACAGTAATATTGAAGAACATTGTGAAAGCTCCAGAAGACATGGAAGGTA	3572	0	A_55_P2649862	Zfp932	NM_145563	ref|Mus musculus zinc finger protein 932 (Zfp932), mRNA [NM_145563]	0.637248	0.070566	1.32742	0.587649	2.01971	2	0	0	0	0.978828	0.83261	1.18229	0.653606	0.698199	0.55994	1.00729	0.96934	2.00562	1.04999	1.17017	0.89212
1617	DATA	3685	23	77	ref|NM_025691|ens|ENSMUST00000150661|ens|ENSMUST00000101087|gb|AK138875	mm|chr5:77405509-77407632	0	NA	218	AATGTCATCAATACTCACACCAAAGTGTTAGCCAATAACTCCCTGTCCTTTGAGAAGGCA	3581	0	A_66_P107579	Srp72	NM_025691	ref|Mus musculus signal recognition particle 72 (Srp72), mRNA [NM_025691]	0.843459	0.181276	1.13638	0.0743747	2.58937	2	0	0	0	0.933121	0.849795	1.01323	0.857403	1.01736	0.655613	1.07435	1.21884	1.11596	0.900178	1.1986	1.16555
1623	DATA	3702	23	94	ref|NM_009755|ref|NR_033241|ens|ENSMUST00000022693|ref|XM_006518460	mm|chr14:70874429-70874370	0	NA	3691	AGGCCCACTGGCTCATCAGCCACACCAGGGCACCCCAGCCAATAAACAGAAAGTGTTACA	3613	0	A_55_P2006703	Bmp1	NM_009755	ref|Mus musculus bone morphogenetic protein 1 (Bmp1), transcript variant 1, mRNA [NM_009755]	1.18103	0.111345	0.725163	0.147567	4.27121	3	0	0	0	0.837637	1.07291	1.50879	1.30872	1.13017	1.10419	0.588452	0.705435	0.881601	0.920647	1.0115	0.929947
1628	DATA	3715	23	107	ref|NM_197988|gb|AK004494|gb|BC027666|ens|ENSMUST00000123927	mm|chr8:123132584-123132525	0	NA	651	CAGGGCCTCTGTTTTTTACAAGTTGTTTTACAGGTATGGGACCTACATCCTGAGCGAGAT	3636	0	A_51_P234044	1190005I06Rik	NM_197988	ref|Mus musculus RIKEN cDNA 1190005I06 gene (1190005I06Rik), mRNA [NM_197988]	0.916796	0.17799	1.1688	0.0300392	2.41811	2	0	0	0	0.87616	0.847823	1.25587	0.830444	0.798455	1.12149	1.17715	1.19378	1.13547	0.982578	0.859158	0.921624
1629	DATA	3718	23	110	ref|NM_009668|ref|NM_001083334|ens|ENSMUST00000091967|ens|ENSMUST00000025239	mm|chr18:32572341-32572783	0	NA	480	GGATGAAGCAAACAAGATTGCAGAGAACAATGACCTACTCTGGATGGACTACCACCAGAA	3642	0	A_52_P384956	Bin1	NM_009668	ref|Mus musculus bridging integrator 1 (Bin1), transcript variant 1, mRNA [NM_009668]	0.747486	0.687024	0.00059276	0	1.88299	2	0	0	0	1.24084	0.489447	6.80883	0.889387	0.00059276	1.35248	0.00059276	0.00059276	0.00059276	0.00059276	0.653468	0.562578
1631	DATA	3725	23	117	ref|NM_007714|ref|NM_001304744|ens|ENSMUST00000147007|ens|ENSMUST00000140628	mm|chr11:51088746-51088805	0	NA	731	AAATGTAGGCCGTTACCGGGAGGCAGCTCGTTCTGAAATCCAAGTATTGGAGCACTTGAA	3654	0	A_52_P128262	Clk4	NM_007714	ref|Mus musculus CDC like kinase 4 (Clk4), transcript variant 1, mRNA [NM_007714]	1.13986	0.17875	0.777748	0.0461481	3.39737	2	0	0	0	0.749755	1.54766	1.16452	1.01746	1.34499	1.05712	0.776909	0.824311	0.732026	1.12757	0.836068	0.821605
1633	DATA	3729	23	121	ref|NM_020491|ens|ENSMUST00000160141|ens|ENSMUST00000025885|gb|AK011957	mm|chr19:5730387-5730328	0	NA	619	GAAACAGCTGGATCACTGAGACTTCTATCCTGATCCCTGTTCCCCTGAGAAAAACCCTCC	3662	0	A_55_P2903910	Sssca1	NM_020491	ref|Mus musculus Sjogren's syndrome/scleroderma autoantigen 1 homolog (human) (Sssca1), mRNA [NM_020491]	1.20942	0.163995	0.912586	0.101266	2.66745	3	0	0	0	0.866275	0.934904	1.0864	1.13272	1.09783	1.39771	1.02593	0.880823	0.831009	0.957869	0.866961	0.921574
1635	DATA	3734	23	126	ref|NM_001145879|ens|ENSMUST00000109541|ens|ENSMUST00000182446|ref|XM_006517290	mm|chr13:91023215-91023156	0	NA	1014	AGCCAGGGAGCCGAATGCTATGAGCTAAGGAACCAACAGATCTGCAAAATCTACATTTAA	3671	0	A_55_P2016139	Atp6ap1l	NM_001145879	ref|Mus musculus ATPase, H+ transporting, lysosomal accessory protein 1-like (Atp6ap1l), mRNA [NM_001145879]	0.431944	0.147596	1.18761	0.112038	7.06329	3	0	0	0	1.11429	4.31815	0.415391	0.271269	0.463065	0.561498	1.05956	1.26761	1.23565	0.4559	0.33972	0.497897
1645	DATA	3745	23	137	gb|CA857419|tc|TC1675305	mm|chr9:123622054-123622112	0	NA	73	CCCCCCACTTTCTGTTACTTCTCTAACATTTTAATGATCATATGAATTACTTAAATATTA	3693	0	A_65_P06482	CA857419	CA857419	gb|il98e09.x1 Kaestner ngn3 - - Mus musculus cDNA clone IMAGE: 3'. [CA857419]	0.792327	0.0350636	1.43249	0.0493305	18.3205	3	0	0	0	0.896705	0.851245	0.567521	0.809634	0.751974	0.815371	1.48928	1.40795	1.40025	1.2829	0.720821	1.00636
1646	DATA	3746	23	138	ref|NM_054068|ens|ENSMUST00000046095|gb|BC057647	mm|chr2:150506541-150506482	0	NA	3464	CCTTTGCTTCTTAAGTGCTGCGATCAAAGGCCTGGCCATGAGATCTTGTTTTTTAAAAAA	3695	0	A_55_P2085015	Vsx1	NM_054068	ref|Mus musculus visual system homeobox 1 homolog (zebrafish) (Vsx1), mRNA [NM_054068]	0.267687	0.280345	1.80792	0.456285	4.98155	3	0	0	0	1.52021	2.13508	0.462556	0.000269581	0.559381	0.243409	2.33435	1.52605	1.56335	0.713941	0.374493	0.566907
1647	DATA	3748	23	140	gb|AB023957|gb|AK204225|gb|AK172004|gb|AK191556	mm|chr18:63113321-63113380	0	NA	577	TAACGAAGGCATGGAGTACCAGGGTGCTTTATATTTAGATTATATTTTAAGTCATGGTGC	3698	0	A_66_P102592	Apcdd1	AB023957	gb|Mus musculus EIG 180 mRNA, complete cds. [AB023957]	0.735122	0.28242	1.08839	0.0812396	2.08215	2	0	0	0	1.35464	1.35418	1.00395	0.919358	0.876036	0.409972	1.14851	1.1207	0.995972	0.894733	1.10109	0.820856
1655	DATA	3764	23	156	ref|NM_007581|ref|NM_001286226|ref|NM_001044741|ens|ENSMUST00000003442	mm|chr15:98474610-98474669	0	NA	2464	CTTAGCATCTGGTGAGACTGGGGAACTGGGGCATATTCAAGCCAAGAGCCAGCCTGGACT	3728	0	A_51_P259009	Cacnb3	NM_007581	ref|Mus musculus calcium channel, voltage-dependent, beta 3 subunit (Cacnb3), transcript variant 1, mRNA [NM_007581]	1.07424	0.0561256	0.59472	0.515874	1.60056	2	0	0	0	0.659992	1.27035	1.65942	1.13877	1.04725	1.03672	0.000290532	0.858523	0.925345	0.874139	1.30873	1.22048
1667	DATA	3795	24	23	ref|NM_133349|ref|NM_001159908|ens|ENSMUST00000079996|ens|ENSMUST00000110851	mm|chr5:139947267-139947208	0	NA	3008	GCAAAATCACCAGGCTTTAGAGACAATATCAAATGCAAGACATTGTGTGTTGAAATATCT	3485	0	A_55_P2063396	Zfand2a	NM_133349	ref|Mus musculus zinc finger, AN1-type domain 2A (Zfand2a), transcript variant 1, mRNA [NM_133349]	0.942727	0.0505874	1.15496	0.0970501	3.35886	3	0	0	0	1.19918	0.691356	0.689179	0.897696	0.997465	0.933021	1.18671	1.23216	1.04602	1.16794	0.790036	1.16924
1668	DATA	3797	24	25	ref|NM_024217|ens|ENSMUST00000034343|ref|XM_006531326|ref|XM_006531329	mm|chr8:106871417-106871476	0	NA	1460	AATACAAAAACAATGTAACAAATGGTCTTTTCTGTAACCTAAGAGGCCCCATGAATAAGG	3489	0	A_51_P321886	Cmtm3	NM_024217	ref|Mus musculus CKLF-like MARVEL transmembrane domain containing 3 (Cmtm3), mRNA [NM_024217]	1.11559	0.164779	0.879938	0.169084	1.72879	3	0	0	0	0.986158	0.862312	0.995772	1.02388	1.01707	1.30582	0.934416	1.01507	0.69033	1.00111	1.07849	1.08957
1671	DATA	3801	24	29	gb|AK038241|gb|XR_141788|tc|TC1592188|riken|A130089I23	mm|chr16:4868899-4868840	0	NA	1827	ACCAAGGGTGCTATACTAGTCTTGTGGATTAGTTAAGACATAAAAACAATTAAATGGTTA	3497	0	A_52_P1140098	Gm10914	AK038241	gb|Mus musculus 16 days neonate thymus cDNA, RIKEN full-length enriched library, clone:A130089I23 product:hypothetical protein, full insert sequence. [AK038241]	1.41017	0.145445	0.528369	0.470897	3.09897	2	0	0	0	0.747178	1.09122	0.782122	1.26041	1.4192	1.55088	0.000308327	0.680117	0.904682	1.03033	1.64582	0.887724
1678	DATA	3824	24	52	ens|ENSMUST00000178282|gb|BC004786|gb|AB644393|gb|AK007826	mm|chr12:114497044-114496985	0	NA	968	TCGGGTAAACCCACCAATGTCAGCGTGTCTGTGATCATGTCAGAGGGAGATGGCATCTGC	3538	0	A_51_P509679	ENSMUST00000178282	ENSMUST00000178282	ens|immunoglobulin heavy constant alpha [Source:MGI Symbol;Acc:MGI:96444] [ENSMUST00000178282]	1.29852	0.333698	0.495503	0.439457	2.52063	3	0	0	0	0.834572	0.368775	1.07438	1.38738	1.5788	0.929388	0.000143029	0.838505	0.64786	1.37033	1.53732	1.43255
1687	DATA	3840	24	68	ref|NM_029988|ens|ENSMUST00000072154|ref|XM_011243987|gb|AK030744	mm|chr12:80182670-80182611	0	NA	1338	CCCCAAGATAAATATCCACAACACACAGTTATTGTCTGGTTCACTGACAGTTTTATTGAC	3566	0	A_52_P606826	Pigh	NM_029988	ref|Mus musculus phosphatidylinositol glycan anchor biosynthesis, class H (Pigh), mRNA [NM_029988]	0.486161	0.433094	1.14874	0.447163	1.84353	3	0	0	0	0.810683	1.48076	1.6306	0.626647	0.831571	0.000263851	0.878845	0.902481	1.6649	1.0011	0.942169	1.22999
1691	DATA	3849	24	77	ref|NM_025843|ens|ENSMUST00000127162|ens|ENSMUST00000036996|gb|AK003300	mm|chr8:86095445-86095504	0	NA	455	GCCCTGAGGTGGCCCTGTAGGGATTACCCGCCAGCCTGTGGACCTATCAGTGAAATAAAA	3582	0	A_51_P519276	Ndufb7	NM_025843	ref|Mus musculus NADH dehydrogenase (ubiquinone) 1 beta subcomplex, 7 (Ndufb7), mRNA [NM_025843]	1.05072	0.0597191	0.90634	0.0445591	3.35626	3	0	0	0	0.871796	1.02956	1.28224	1.07309	1.09603	0.983049	0.956886	0.889395	0.872739	0.993734	0.985249	0.966235
1696	DATA	3868	24	96	ref|NM_172628|ens|ENSMUST00000051720|ref|XM_006525882|ref|XM_006525881	mm|chr18:62175070-62175129	0	NA	4236	GACCCTTTAGTGCCTGTGGAAGAACCCATTGTTTCTTTTTCGCTTTCTTCAAAACCAAAA	3618	0	A_51_P202596	Sh3tc2	NM_172628	ref|Mus musculus SH3 domain and tetratricopeptide repeats 2 (Sh3tc2), mRNA [NM_172628]	1.18079	0.148074	0.785194	0.132328	3.45033	3	0	0	0	0.941625	0.823821	1.27197	1.34544	1.05856	1.13836	0.761757	0.927675	0.66615	0.991971	0.918188	1.15448
1699	DATA	3875	24	103	ref|NM_001304432|ref|NM_145941|ens|ENSMUST00000142344|ens|ENSMUST00000150333	mm|chr16:20682236-20682295	0	NA	2570	ACCTCATCTTTGAGAAAGCCATTTCAGAGCCCAACTTCTCTGTGGCTTATGCCAACATGT	3630	0	A_55_P2734057	Eif4g1	NM_001304432	ref|Mus musculus eukaryotic translation initiation factor 4, gamma 1 (Eif4g1), transcript variant 3, mRNA [NM_001304432]	1.10672	0.159233	0.825698	0.0969802	2.61073	3	0	0	0	0.929172	1.00154	1.32406	1.03854	0.992932	1.28869	0.890078	0.872858	0.714157	0.9372	1.0653	0.945461
1707	DATA	3890	24	118	ref|NM_009088|ens|ENSMUST00000055296|ref|XM_006505804|gb|AK147379	mm|chr6:71929251-71929310	0	NA	6005	AAAGACAGAGGCTTTATGAAGCCAGACCGTTTCTATTTTTGTCCACTGTTATTCCAGCGT	3657	0	A_51_P236197	Polr1a	NM_009088	ref|Mus musculus polymerase (RNA) I polypeptide A (Polr1a), mRNA [NM_009088]	1.14813	0.0473112	0.783246	0.270943	2.29784	2	0	0	0	0.807519	0.927613	1.10475	1.14592	1.10197	1.19651	0.915724	0.962459	0.471554	1.17754	1.08369	1.10475
1709	DATA	3895	24	123	ref|NM_009239|ref|NM_001166385|ens|ENSMUST00000026367|gb|BC076630	mm|chr12:119473861-119473802	0	NA	5314	CATGTCACTAAGTTGTCATCCCACATAAATTGATGTCCAGCATAGGGTATTAAATTTACA	3666	0	A_55_P2805240	Sp4	NM_009239	ref|Mus musculus trans-acting transcription factor 4 (Sp4), transcript variant 1, mRNA [NM_009239]	0.83911	0.0605501	1.31169	0.0945124	7.29239	3	0	0	0	1.04854	0.949118	0.868951	0.770068	0.864079	0.883183	1.22249	1.41074	1.30184	0.956427	0.847759	0.876802
1711	DATA	3898	24	126	ref|NM_146118|ref|NM_001164357|ref|NM_001164358|ref|NM_001290558	mm|chr2:32270549-32270490	0	NA	2799	CATATTTATGTTCATGGTTGATTGTACCTTCCTGTCATCACCTGGTGGGGCATGGGAAGA	3672	0	A_55_P2046198	Slc25a25	NM_146118	ref|Mus musculus solute carrier family 25 (mitochondrial carrier, phosphate carrier), member 25 (Slc25a25), transcript variant 1, mRNA [NM_146118]	1.69096	0.255325	0.917494	0.0894035	4.95215	2	0	0	0	1.14821	0.425727	0.562969	1.41866	1.72921	1.925	0.84212	1.01627	0.89409	0.482151	0.822711	0.732878
1714	DATA	3904	24	132	ref|NM_001083938|ref|NM_026611|ens|ENSMUST00000097420|ens|ENSMUST00000089119	mm|chr17:8321570-8321511	0	NA	854	CTACAAAGACCCAACATTGATGTTCACATTTTGGAAATATTTTGTGTCCCACAAAGTAAG	3684	0	A_55_P2040371	Rnaset2a	NM_001083938	ref|Mus musculus ribonuclease T2A (Rnaset2a), mRNA [NM_001083938]	0.856476	0.129931	1.04746	0.0457772	2.40127	2	0	0	0	1.27151	0.929777	0.968027	0.901849	0.957636	0.709942	1.00476	1.04183	1.09579	0.996922	0.98805	1.1339
1715	DATA	3906	24	134	ref|NM_011287|ens|ENSMUST00000116410|ens|ENSMUST00000071184|ens|ENSMUST00000120360	mm|chr17:28467854-28467913	0	NA	705	ATTTCTTGGTGTCCTTGCTCAAGAAAAACTGGCAAAACGTGCGGGCTCTGTACATCAAGA	3688	0	A_55_P1981499	Rpl10a	NM_011287	ref|Mus musculus ribosomal protein L10A (Rpl10a), mRNA [NM_011287]	0.898605	0.0974099	1.03596	0.0282083	2.34594	2	0	0	0	1.36	0.98742	0.991793	0.969054	0.939318	0.787444	1.04296	1.06001	1.00491	0.913298	0.955498	0.988295
1717	DATA	3908	24	136	ref|NM_011424|ref|NM_001253904|ref|NM_001253905|ens|ENSMUST00000086083	mm|chr5:125497631-125497573	0	NA	8636	GAAATGGACTTGATGCGTATTCTGTGGCCGCTCTCTGTGCACGGCGGCATTCTGTCATTT	3692	0	A_51_P286814	Ncor2	NM_011424	ref|Mus musculus nuclear receptor co-repressor 2 (Ncor2), transcript variant 1, mRNA [NM_011424]	1.08153	0.112042	0.908549	0.0433819	2.49366	2	0	0	0	1.36482	0.86619	1.04019	1.20955	1.00137	1.03366	0.866295	0.952977	0.906375	0.833158	0.90648	1.01894
1726	DATA	3919	24	147	ref|NM_025551|ens|ENSMUST00000179990|ens|ENSMUST00000020209|gb|AK032774	mm|chr10:93683562-93683621	0	NA	429	AAGAAGATTCATGAATGGGTTCCACCTTTGACACCTTACAAGTGACCGCAGTGAAGACTG	3712	0	A_52_P724940	Ndufa12	NM_025551	ref|Mus musculus NADH dehydrogenase (ubiquinone) 1 alpha subcomplex, 12 (Ndufa12), mRNA [NM_025551]	1.14079	0.0336513	1.02106	0.106448	1.85756	2	0	0	0	0.443803	0.942743	0.949732	1.1224	1.17963	1.12035	1.06697	1.09685	0.899366	1.04564	1.08999	1.04251
1728	DATA	3923	24	151	ref|NM_001267625|ens|ENSMUST00000178756|gb|AK039011|ens|ENSMUST00000147469	mm|chr12:84314797-84314738	0	NA	3095	GAGTATCTTCAGAGACTAACTACTTGTTTGGGGGATCATATTAAATTAATTTCAGAAGGG	3720	0	A_55_P2489244	Dpf3	NM_001267625	ref|Mus musculus D4, zinc and double PHD fingers, family 3 (Dpf3), transcript variant 1, mRNA [NM_001267625]	0.933191	0.217935	1.4399	0.0790301	3.78589	2	0	0	0	0.21939	1.08729	1.09646	0.696999	1.12649	0.976085	1.37469	1.52779	1.41724	0.888893	0.88828	0.700395
1734	DATA	3935	24	163	ens|ENSMUST00000024816|gb|BC056481|gb|AK086881|gb|BC080305	mm|chr17:29842655-29842714	0	NA	6110	GAACCCCAGGTTAGCTGTGTCTTGTAGGAACAGGGCACCAGTTGTTTCCACCAGAGCCTG	3743	0	A_52_P309418	Cmtr1	ENSMUST00000024816	ens|cap methyltransferase 1 [Source:MGI Symbol;Acc:MGI:1921407] [ENSMUST00000024816]	1.2683	0.1362	0.805579	0.0303919	5.74317	2	0	0	0	0.486891	0.902654	1.38129	1.11987	1.29749	1.38754	0.822812	0.770487	0.823437	0.967278	0.999382	1.04087
1746	DATA	3961	25	25	ens|ENSMUST00000174495|gb|AK020361|tc|TC1621633|riken|9230119C12	mm|chr7:89614198-89614257	0	NA	688	AGAGTAAGTGTTGAACCCTAGCCCTGTAGTACCATAAGCAAGCTGTGTTTTCCACTCTGA	3789	0	A_51_P213077	Adamtsl3	ENSMUST00000174495	ens|ADAMTS-like 3 [Source:MGI Symbol;Acc:MGI:3028499] [ENSMUST00000174495]	1.09406	1.03575	0.00079613	0	1.82822	2	0	0	0	1.71301	1.44431	1.61084	2.06065	1.22073	0.00079613	0.00079613	0.00079613	0.00079613	0.00079613	1.92763	2.01885
1750	DATA	3970	25	34	ref|NM_177385|ens|ENSMUST00000102819|ref|XM_006538032|ref|XM_006538031	mm|chr4:84602972-84603031	0	NA	893	AAATGAGAGATTACGAACACGCTGCACTGACCTGCTAAATGACCTGGAGAAACTGAGGAA	3805	0	A_55_P2096933	Cntln	NM_177385	ref|Mus musculus centlein, centrosomal protein (Cntln), transcript variant 2, mRNA [NM_177385]	1.05144	0.0268979	0.826014	0.0957583	3.92545	2	0	0	0	0.941047	0.965728	1.52976	1.08019	1.0269	1.04722	0.744987	0.801369	0.931686	0.980089	1.05775	0.893282
1753	DATA	3974	25	38	ref|NM_148939|ens|ENSMUST00000062657|gb|AJ315554|gb|AJ315553	mm|chr17:35251543-35251484	0	NA	401	ACAGTTTTACCAGGCCCTGAACCTCTCTCTGCCTCAGCCTGGCTTCCATGCTCATAAGGT	3813	0	A_51_P369443	Ly6g5b	NM_148939	ref|Mus musculus lymphocyte antigen 6 complex, locus G5B (Ly6g5b), mRNA [NM_148939]	0.881244	0.0436025	1.19432	0.228014	2.33591	2	0	0	0	0.768835	0.885567	1.03031	0.850244	0.862386	0.931101	1.23949	0.947107	1.39638	1.00009	0.981326	1.10717
1754	DATA	3982	25	46	gb|BC005429	mm|chr15:34365736-34365795	0	NA	3185	GGGAAGGAATCCTGAATTCTGAGTTTACCATGAGAATAAATAAGTTGCGCAGTGAAAAAA	3828	0	A_55_P2742136	Matn2	BC005429	gb|Mus musculus matrilin 2, mRNA (cDNA clone MGC:5875 IMAGE:3492881), complete cds. [BC005429]	0.930213	0.0705868	1.2101	0.0836637	4.42863	3	0	0	0	1.0292	0.938928	0.662285	0.925856	0.861906	1.00288	1.19667	1.13396	1.29966	1.01842	0.921263	1.00897
1763	DATA	4008	25	72	gb|AK015435|riken|4930449M09|nap|NAP023986-001	mm|chr7:53601211-53601152	0	NA	788	CCCCATCCCACCTCATTTTTCTCTTTGTGGATACTGTTTACAATGAGAATTTTAAAATGT	3877	0	A_55_P2253195	1700025L06Rik	AK015435	gb|Mus musculus adult male testis cDNA, RIKEN full-length enriched library, clone:4930449M09 product:unclassifiable, full insert sequence. [AK015435]	0.855932	0.289995	1.36455	0.253975	2.28529	3	0	0	0	0.914411	0.591181	0.937942	0.942271	0.532574	1.09295	1.62381	1.35363	1.11621	0.852251	0.957978	1.08479
1768	DATA	4017	25	81	ref|NM_013568|ens|ENSMUST00000040751|ens|ENSMUST00000185333|ens|ENSMUST00000128137	mm|chr6:126658483-126658424	0	NA	5702	GAGAGTTGCTGGTCTGATCAAAGGAGAGGAGGTGTTAGGATGATCTGGGATCGGAAGAAT	3894	0	A_52_P130787	Kcna6	NM_013568	ref|Mus musculus potassium voltage-gated channel, shaker-related, subfamily, member 6 (Kcna6), mRNA [NM_013568]	0.628222	0.253807	1.35482	0.616251	1.88832	2	0	0	0	0.947039	1.30318	1.25816	0.873822	0.643908	0.366936	1.07635	0.926956	2.06116	0.987393	1.07267	0.482428
1769	DATA	4023	25	87	ref|NM_175340|ens|ENSMUST00000052747|gb|AK045746|gb|BC062644	mm|chr13:47108064-47108005	0	NA	2155	AGCACATTGATGGCAGAAGTGATTTTGTTTGGTGTGGTAAATCTCTGACGCCTGAAGCAC	3905	0	A_52_P20727	Nhlrc1	NM_175340	ref|Mus musculus NHL repeat containing 1 (Nhlrc1), mRNA [NM_175340]	0.805099	0.136685	1.18276	0.153139	3.18668	3	0	0	0	0.90588	0.985132	0.832628	0.738992	0.962271	0.714035	1.27766	1.26452	1.00609	1.1343	1.03066	1.14783
1770	DATA	4028	25	92	ref|NM_175305|ens|ENSMUST00000107101|ens|ENSMUST00000053419|ref|XM_006502614	mm|chr4:94303850-94303791	0	NA	2273	CTCTCTCTCTCTCTCTCTCTGTATGTGTATTCCATACACACACAGAAACATTAAAATTTA	3913	0	A_55_P2001023	Lrrc19	NM_175305	ref|Mus musculus leucine rich repeat containing 19 (Lrrc19), mRNA [NM_175305]	0.864982	0.101921	1.18101	0.130962	3.29844	3	0	0	0	1.05494	1.00646	0.910054	0.76359	0.863932	0.967424	1.06057	1.16203	1.32042	0.89768	0.912079	1.08082
1773	DATA	4034	25	98	ref|NM_001302970|ref|NM_009679|ens|ENSMUST00000119733|ens|ENSMUST00000007216	mm|chr16:20537792-20539424	0	NA	223	ACAGAGATGACATCGGGAGGAATGCTGTGGATGCCTTTCGGGTCAATGTCATTCATGCAC	3924	0	A_65_P19250	Ap2m1	NM_001302970	ref|Mus musculus adaptor-related protein complex 2, mu 1 subunit (Ap2m1), transcript variant 2, mRNA [NM_001302970]	1.23823	0.304456	0.749407	0.224975	2.23657	3	0	0	0	0.823442	1.13189	1.06676	1.12054	1.0102	1.58397	0.886594	0.871859	0.489768	0.921864	1.05516	1.03796
1775	DATA	4037	25	101	gb|AK083001|tc|TC1617783|riken|C530030I18|nap|NAP119483-1	mm|chr18:65785009-65785068	0	NA	2639	GAAGAAGACAAAAGAAGACAAGTAGGCTTCCATCACACAGAACATAAACCACGAGTGGAA	3930	0	A_51_P139257	Zfp532	AK083001	gb|Mus musculus 12 days embryo spinal cord cDNA, RIKEN full-length enriched library, clone:C530030I18 product:ZINC FINGER PROTEIN homolog [Homo sapiens], full insert sequence. [AK083001]	1.42483	0.62447	0.467198	0.374853	2.27733	3	0	0	0	0.906554	2.43819	0.10618	2.09544	1.31905	0.860011	0.681188	0.686041	0.0343635	1.28897	0.777896	0.806122
1780	DATA	4054	25	118	ref|NM_013746|ref|NM_001163182|ref|NM_001163183|ref|NM_001163186	mm|chr7:107792613-107792554	0	NA	1858	AACCCCTCATGTGCCTGTCTATAGGTAGCAAGCAATCTCTCCATTTGATCCTGTTCCAAA	3958	0	A_51_P451588	Plekhb1	NM_013746	ref|Mus musculus pleckstrin homology domain containing, family B (evectins) member 1 (Plekhb1), transcript variant 1, mRNA [NM_013746]	0.663518	0.119949	1.08922	0.126356	4.23219	3	0	0	0	1.27247	1.09715	1.9377	0.664347	0.543157	0.783051	1.17365	1.15006	0.943958	0.922219	0.894806	0.617426
1784	DATA	4067	25	131	ref|NM_011291|ens|ENSMUST00000125005|ens|ENSMUST00000058437|ens|ENSMUST00000141217	mm|chr1:16092833-16092774	0	NA	488	TTAAGCTCAACAAGGCTTCAATTAACATGCTGCGGATTGTGGAGCCATACATTGCATGGG	3981	0	A_55_P2909620	Rpl7	NM_011291	ref|Mus musculus ribosomal protein L7 (Rpl7), mRNA [NM_011291]	0.880211	0.0972651	1.08781	0.0721739	2.96877	3	0	0	0	1.3276	1.04847	0.882205	0.815527	0.833039	0.992067	1.01715	1.08488	1.1614	0.90117	0.88346	1.05303
1790	DATA	4080	25	144	ref|NM_001162855|ens|ENSMUST00000161076|ens|ENSMUST00000161470|ens|ENSMUST00000160289	mm|chr7:137681700-137680557	0	NA	917	TTGCAGACATACTTTCGAGAAGACCCTGATACTCCAATGTCATTTTTTGATTTTGTGGTT	4004	0	A_55_P2491234	Nsmce4a	NM_001162855	ref|Mus musculus non-SMC element 4 homolog A (S. cerevisiae) (Nsmce4a), mRNA [NM_001162855]	0.768286	0.094262	1.1853	0.10131	5.21964	3	0	0	0	1.22146	1.03936	0.869982	0.726598	0.876204	0.702056	1.08264	1.2852	1.18807	1.003	0.993179	1.01226
1794	DATA	4090	25	154	ens|ENSMUST00000118615|nap|NAP026734-1|nap|NAP018688-001	mm|chr2:3597764-3597705	0	NA	98	AAAGACCCACGAACGTCGGCATTGGGCAGGACATCCAACTTAAAAGAGATCTCACATGCT	4024	0	A_52_P664965	ENSMUST00000118615	ENSMUST00000118615	ens|predicted gene 13183 [Source:MGI Symbol;Acc:MGI:3650466] [ENSMUST00000118615]	0.581281	0.1248	1.51239	0.295011	5.03471	2	0	0	0	0.771939	0.551593	0.798744	0.439536	0.629652	0.674655	1.85149	1.31471	1.37098	1.24826	1.17872	1.16973
1798	DATA	4097	25	161	ens|ENSMUST00000142141|gb|AK002723|gb|BB638523|tc|TC1679816	mm|chr17:27159225-27159284	0	NA	160	GGATGCGGTATCAGGTGGCCTCTTAGAAGCCATCCAGTTGCAATTGGGCTGGCGGAAGTT	4037	0	A_51_P158638	Ggnbp1	ENSMUST00000142141	ens|gametogenetin binding protein 1 [Source:MGI Symbol;Acc:MGI:3055306] [ENSMUST00000142141]	1.30756	0.245632	0.906512	0.151335	2.40769	3	0	0	0	0.571308	0.967793	1.02099	1.16851	1.163	1.59117	1.06268	0.896321	0.760529	1.0215	0.918899	0.85729
1801	DATA	4105	26	5	ref|NM_009316|ref|NM_172688|ens|ENSMUST00000037607|ens|ENSMUST00000080933	mm|chr4:32107645-32107704	0	NA	2965	CTGAGTCTGTTGCCTTCCCATGCTTTTAAGAGAATTTGAACACTTACAAAGAGAATATTT	3755	0	A_55_P2049086	Map3k7	NM_009316	ref|Mus musculus mitogen-activated protein kinase kinase kinase 7 (Map3k7), transcript variant B, mRNA [NM_009316]	1.10202	0.119175	0.814627	0.0405009	3.95476	2	0	0	0	1.04633	1.00764	1.3145	1.02626	1.04041	1.23939	0.819307	0.852585	0.77199	0.936104	0.966133	0.979343
1802	DATA	4107	26	7	ref|NM_010734|ens|ENSMUST00000097336|gb|M18187|gb|BC086881	mm|chr17:35323951-35323892	0	NA	119	GGGCTCCTCCTCCTGCTTGTCATCATCCTGTTCATCTGCTTGTGCCGGTTCAGTCAGAGA	3759	0	A_55_P2044953	Lst1	NM_010734	ref|Mus musculus leukocyte specific transcript 1 (Lst1), mRNA [NM_010734]	0.857227	0.0134022	1.20404	0.165739	3.61254	2	0	0	0	0.767093	1.01691	0.930157	0.871048	0.844288	0.856345	1.39244	1.08072	1.13895	1.13924	0.899133	1.06367
1805	DATA	4112	26	12	ref|NM_030249|ref|NM_001163332|ref|NM_001163333|ens|ENSMUST00000077548	mm|chr3:104806798-104806739	0	NA	2980	CATGGGAACTTCTGATTCTGGTTGCTTTTACTTGAATAGGAAATGACATAATGAACTCTT	3767	0	A_55_P1973046	Cttnbp2nl	NM_030249	ref|Mus musculus CTTNBP2 N-terminal like (Cttnbp2nl), transcript variant 1, mRNA [NM_030249]	1.33954	0.0920154	0.814493	0.105176	6.5076	3	0	0	0	0.957625	0.446836	1.19578	1.23337	1.39616	1.3891	0.74625	0.935615	0.761615	0.939768	0.983372	1.01452
1809	DATA	4122	26	22	ref|NM_177087|ens|ENSMUST00000097284|ens|ENSMUST00000129072|ref|XM_006524400	mm|chr17:72078928-72078987	0	NA	3421	CACATGACCTACTTTTCCCGTTAGGGTCCCCAATGTATATAGTATATTTTAAAGTAGAAA	3784	0	A_55_P2071354	Fam179a	NM_177087	ref|Mus musculus family with sequence similarity 179, member A (Fam179a), mRNA [NM_177087]	1.16232	0.184717	0.906969	0.0479921	2.31744	2	0	0	0	0.624961	0.731628	1.06705	1.02243	1.09283	1.37171	0.858566	0.907803	0.954539	1.05955	1.29054	1.01839
1817	DATA	4139	26	39	ref|NM_001290335|ref|NM_001256000|ref|NM_001256001|ref|NM_001256002	mm|chr6:118691922-118685016	0	NA	785	TTGTACTTAACTTGGTTCTCGGTGTTCTTAGCGGGGAGTTTTCCAAAGAGAGGGAGAAAG	3815	0	A_55_P2741079	Cacna1c	NM_001290335	ref|Mus musculus calcium channel, voltage-dependent, L type, alpha 1C subunit (Cacna1c), transcript variant 11, mRNA [NM_001290335]	1.31728	0.162485	0.320392	0.554293	2.98927	2	0	0	0	0.887399	0.961361	0.930788	1.12998	1.42042	1.40143	0.000370586	0.960435	0.000370586	1.31404	1.59506	1.39834
1818	DATA	4140	26	40	ref|NM_153402|gb|AK087577|gb|BX517280|tc|TC1605605	mm|chr4:126018059-126018000	0	NA	7497	AGAAATCAGAAAAGCAGCTGGGTTTAGTGCTTGCCTGTGATCCTAACCAGAAGATCTGGA	3817	0	A_55_P2835190	Ago3	NM_153402	ref|Mus musculus argonaute RISC catalytic subunit 3 (Ago3), mRNA [NM_153402]	1.20045	0.22635	0.698216	0.117905	3.40845	3	0	0	0	1.01006	1.03838	0.842928	1.44016	1.17081	0.99038	0.681491	0.82359	0.589566	1.01006	1.19878	1.20379
1824	DATA	4150	26	50	ref|NM_023370|ref|NM_001252635|ens|ENSMUST00000156501|ens|ENSMUST00000153525	mm|chr10:59767671-59767612	0	NA	9941	GCAGTCAAGCCCGATGATGACAGATACCTGCGTGCAGCCATCCAGGAATACGACAACATC	3837	0	A_52_P416341	Cdh23	NM_023370	ref|Mus musculus cadherin 23 (otocadherin) (Cdh23), transcript variant 1, mRNA [NM_023370]	1.43433	0.698238	0.203149	0.350487	2.72951	2	0	0	0	0.733864	1.21836	1.04488	1.10116	0.965088	2.23675	0.000794584	0.607856	0.000794584	1.22565	1.22896	1.63585
1829	DATA	4159	26	59	ens|ENSMUST00000101402|gb|AK145307|tc|TC1593183|riken|G930045G22	mm|chr6:50796920-50796861	0	NA	275	CTTGCCTCATCCAGGGACCGCACTTCCTTCCACAAGCATTATTATTGGCGTAATCATTCT	3853	0	A_66_P114797	ENSMUST00000101402	ENSMUST00000101402	ens|RIKEN cDNA G930045G22 gene [Source:MGI Symbol;Acc:MGI:3588242] [ENSMUST00000101402]	0.880984	0.115423	1.31747	0.0906214	5.15181	3	0	0	0	0.805466	0.663513	0.915295	0.839104	0.792347	1.0115	1.41179	1.30953	1.23107	1.17877	0.905624	0.935982
1832	DATA	4165	26	65	ref|NM_008150|ens|ENSMUST00000033450|gb|BC006622|gb|X83577	mm|chrX:49406447-49406388	0	NA	2072	TGTTCTGCGTGGCTAGCAGTGTAGGTACAGAACTGTAGTTAGTTGTGCATTGGTGATCTT	3865	0	A_51_P252725	Gpc4	NM_008150	ref|Mus musculus glypican 4 (Gpc4), mRNA [NM_008150]	0.888865	0.0873366	1.14154	0.0599268	4.13188	3	0	0	0	1.08403	0.957723	1.09011	0.800075	0.89185	0.974671	1.16654	1.18492	1.07316	0.939016	0.851558	0.986343
1833	Mean	4166	26	66	ens|ENSMUST00000119247|ref|XR_377022|ref|XR_402559|nap|NAP062110-1	mm|chr5:73867929-73867870	0	NA	663	TATAGATGACTGCTACATTTCAGACAGAGGCTACACTGCCACCCTAGGCAATTTTGCCAA	3867	0	A_55_P1980165	ENSMUST00000119247	ENSMUST00000119247	ens|predicted gene 15653 [Source:MGI Symbol;Acc:MGI:3783097] [ENSMUST00000119247]	0.931563	0.0394843	1.08634	0.0376487	4.91374	3	0	0	0	1.04006	0.969096	0.921067	0.903215	0.914812	0.976661	1.04322	1.11269	1.1031	1.01287	0.972156	1.03105
1836	DATA	4172	26	72	ref|XM_006519922|ref|XM_006543185|gb|XR_106859	mm|chr14:61894231-61894290	0	NA	376	TGGCTCCTCAGCTCCTATTCTGGGGACATCAGGCTTCCCACTGCCGGAGACTTAGCTTAA	3878	0	A_55_P1961391	Gm17778	XM_006519922	ref|PREDICTED: Mus musculus predicted gene, 17778 (Gm17778), mRNA [XM_006519922]	0.804325	0.125382	1.33478	0.201928	3.86548	3	0	0	0	0.89609	0.642821	0.54898	0.884051	0.869122	0.659803	1.55769	1.16409	1.28256	1.00704	1.2206	1.26715
1837	DATA	4173	26	73	ref|NM_026408|ref|NM_001199154|ref|NM_001199151|ref|NM_001199153	mm|chr18:53075430-53075489	0	NA	3397	CTCAGCTCATTGAGGCCAGGTCACTGGTTTTATTTTCTGTCCAGAGTGTTTCTCTGTCAT	3880	0	A_52_P59264	Sncaip	NM_026408	ref|Mus musculus synuclein, alpha interacting protein (synphilin) (Sncaip), transcript variant 2, mRNA [NM_026408]	1.16343	0.0513031	0.882311	0.0889835	4.74047	3	0	0	0	1.13608	1.24359	0.837913	1.22226	1.14	1.12803	0.952391	0.912346	0.782197	0.914522	0.844442	0.886229
1839	DATA	4175	26	75	ref|NM_011580|ens|ENSMUST00000039559|ref|XM_006499152|gb|AK145202	mm|chr2:117952585-117952644	0	NA	5517	GCCTGTAGAGTTAGTATTTCTGGTTTTTATATGTTGCACACTGAATTGAAGAAATGTTGG	3884	0	A_55_P2746459	Thbs1	NM_011580	ref|Mus musculus thrombospondin 1 (Thbs1), mRNA [NM_011580]	2.47807	0.472176	0.639505	0.120711	6.53415	2	0	0	0	0.392697	0.120163	0.412751	2.35221	2.08158	3.00043	0.778871	0.571807	0.567836	0.47109	0.603772	0.646797
1859	DATA	4224	26	124	ref|NM_201359|ref|NM_001252153|ens|ENSMUST00000064200|ref|XM_006521117	mm|chr15:97795281-97795340	0	NA	285	ATGGGGTCTCAGCACTCCTCTGCCCTCACATTTTGTCAGCGAAAGAAGGATGACAACCCG	3969	0	A_55_P2739316	Tmem106c	NM_201359	ref|Mus musculus transmembrane protein 106C (Tmem106c), transcript variant 1, mRNA [NM_201359]	0.852166	0.0720155	1.40314	0.191689	4.6604	2	0	0	0	0.760292	0.781264	0.764486	0.792089	0.832411	0.931997	1.60231	1.38717	1.21993	1.0416	0.9688	0.917654
1862	DATA	4233	26	133	ref|NM_026403|ens|ENSMUST00000019441|gb|AK146687|riken|I920041N19	mm|chr14:56374169-56374228	0	NA	3525	GCTCTACCTCCAGGTGTTTTGCCATCTTCCCTGTAGGGGTTTTGTTTGTTTATTTCTTTT	3986	0	A_55_P2146279	Nop9	NM_026403	ref|Mus musculus NOP9 nucleolar protein (Nop9), mRNA [NM_026403]	0.840188	0.026361	1.30121	0.293765	2.70734	2	0	0	0	0.867444	0.740181	0.85547	0.818473	0.832572	0.869518	1.49686	0.96341	1.44336	1.12689	0.991407	0.994407
1869	DATA	4252	26	152	ref|NM_011288|ens|ENSMUST00000137345|ens|ENSMUST00000038675|ens|ENSMUST00000173086	mm|chr7:149726578-149726637	0	NA	512	CAGGATTTGGACCACAGACCCTAGTGAGCACAGTGGTTCTGACAAGCCCAAATAAAAATT	4021	0	A_51_P193130	Mrpl23	NM_011288	ref|Mus musculus mitochondrial ribosomal protein L23 (Mrpl23), mRNA [NM_011288]	1.16395	0.0576246	0.970256	0.074219	3.5705	3	0	0	0	0.471658	0.984563	1.05359	1.09762	1.19257	1.20167	1.05563	0.921112	0.934025	1.11026	1.09985	0.877448
1870	DATA	4260	26	160	ref|NM_001302471|ens|ENSMUST00000119365|ens|ENSMUST00000029744|gb|AK037222	mm|chr3:96468377-96468436	0	NA	4975	AGTCCCTCCTGGGGACTGTCATGGTGAGCAAATGGTCAGAACAAATAAAATCCAGTTATC	4036	0	A_55_P2111533	Itga10	NM_001302471	ref|Mus musculus integrin, alpha 10 (Itga10), mRNA [NM_001302471]	1.35778	0.115468	0.522421	0.266389	4.98343	2	0	0	0	0.595458	0.965572	1.34614	1.27523	1.48973	1.30837	0.499798	0.268064	0.7994	1.10965	1.41981	0.922772
1887	DATA	4310	27	46	ref|NM_025557|gb|AY304481|gb|AK075738|gb|AK002772	mm|chr1:173103482-173103423	0	NA	1487	CAGGGCAAACATCGCCACTGTATGTGACTTTAGCATGTTTAATAATGATGACAATAAAAA	4124	0	A_55_P1983754	Pcp4l1	NM_025557	ref|Mus musculus Purkinje cell protein 4-like 1 (Pcp4l1), mRNA [NM_025557]	1.00458	0.0862385	1.15242	0.065186	2.36873	3	0	0	0	0.992098	0.617451	0.77714	0.997003	1.09436	0.922379	1.11208	1.11756	1.22762	1.05201	1.11825	0.972058
1889	DATA	4315	27	51	ref|NM_010194|ens|ENSMUST00000080932|ref|XM_006540604|gb|BC129919	mm|chr7:87523469-87522943	0	NA	2403	CCAACCTCACCAATCAGCAGACACGGGAGTTTGTAGAAAAGGGGCATCGTCTGCCTTGCC	4133	0	A_52_P365011	Fes	NM_010194	ref|Mus musculus feline sarcoma oncogene (Fes), mRNA [NM_010194]	1.24243	0.153068	0.655626	0.129715	5.06574	3	0	0	0	0.96932	0.902045	1.39133	1.38223	1.07887	1.2662	0.658557	0.78385	0.52447	0.924572	1.08073	1.03783
1890	DATA	4316	27	52	ref|NM_183216|ens|ENSMUST00000058856|gb|AY430080|tc|TC1591623	mm|chr19:44420742-44420801	0	NA	2580	TCTGAGAACACATTGTGCTGTGGGGGCTCCAGAAGTTACTGAGTTACTAAGTATTGAGAG	4135	0	A_55_P2011872	Scd4	NM_183216	ref|Mus musculus stearoyl-coenzyme A desaturase 4 (Scd4), mRNA [NM_183216]	0.317616	0.152955	1.88887	0.527995	4.95083	2	0	0	0	1.45886	1.83804	0.937569	0.342832	0.456397	0.15362	1.52551	1.64656	2.49452	0.233292	0.409801	0.502992
1894	Mean	4324	27	60	ref|NM_009429|ens|ENSMUST00000121768|ens|ENSMUST00000121046|ens|ENSMUST00000134040	mm|chr14:76247107-76247166	0	NA	628	TGAAGATGGTGTGACTCCATTCATGATTTTCTTTAAGGATGGCTTAGAGATGGAGAAATG	4150	0	A_55_P2075013	Tpt1	NM_009429	ref|Mus musculus tumor protein, translationally-controlled 1 (Tpt1), mRNA [NM_009429]	0.893589	0.0453619	1.20615	0.1443	3.57904	2	0	0	0	0.978937	1.04044	0.933776	0.841212	0.919319	0.920236	1.12645	1.11928	1.37272	0.907362	0.93683	0.903434
1897	DATA	4331	27	67	ref|NM_023279|ens|ENSMUST00000071134|gb|AK082942|gb|AK014302	mm|chr8:125945701-125945760	0	NA	1513	CATTAGGGCTCCCAGGTTAAAGTCCTTCAGTATTTATGGCCACCCCCACTCCATGTGAGT	4162	0	A_51_P381381	Tubb3	NM_023279	ref|Mus musculus tubulin, beta 3 class III (Tubb3), mRNA [NM_023279]	0.867252	0.0937767	1.16859	0.230416	2.0981	2	0	0	0	1.021	0.783466	0.940259	0.972895	0.793845	0.835015	1.43339	1.05863	1.01376	1.13598	0.927484	1.08428
1899	DATA	4336	27	72	ref|NM_008812|ens|ENSMUST00000030765|ref|XM_006534676|ref|XM_006538632	mm|chr4:140508436-140508495	0	NA	4692	GACTGAGAAGTGTTTGGGGAAGAGCCAAAATAAAGAGCAATAAAATAAGCCGTCCACGGG	4172	0	A_55_P2074656	Padi2	NM_008812	ref|Mus musculus peptidyl arginine deiminase, type II (Padi2), mRNA [NM_008812]	1.31769	0.220396	0.456799	0.397291	3.28199	3	0	0	0	0.56677	0.3512	1.12924	1.46838	1.41994	1.06474	0.645321	0.724732	0.000344018	1.63982	1.14615	1.84336
1903	DATA	4343	27	79	ref|NM_008495|ens|ENSMUST00000089377|gb|BC002063|gb|X66532	mm|chr15:78760566-78760625	0	NA	470	TTTGAGTGAAGCCAGCCAGCCTGTAGCCCTCAATAAAGGCAGCTGCCTCTGCTCCCCATA	4186	0	A_51_P465281	Lgals1	NM_008495	ref|Mus musculus lectin, galactose binding, soluble 1 (Lgals1), mRNA [NM_008495]	1.16863	0.061387	0.884412	0.0423565	6.60055	3	0	0	0	0.761559	0.749998	1.21039	1.16384	1.10978	1.23227	0.887686	0.840514	0.925037	1.08179	0.980715	1.05642
1909	DATA	4353	27	89	ref|NM_026877|ref|NM_198223|ref|NM_001164224|ens|ENSMUST00000026135	mm|chr11:120570249-120570308	0	NA	1494	TATCTGGAACCTGGGCTGCTAGAACACACCGTCTCCCCATCTACAGCTGATGTGCTGGTG	4206	0	A_55_P2062262	Aspscr1	NM_026877	ref|Mus musculus alveolar soft part sarcoma chromosome region, candidate 1 (human) (Aspscr1), transcript variant 1, mRNA [NM_026877]	0.977393	0.0523191	1.11386	0.0720138	2.65541	3	0	0	0	0.845941	0.869786	0.998731	0.928114	0.971768	1.0323	1.07925	1.19664	1.06568	1.09906	0.889595	1.02313
1913	DATA	4368	27	104	ref|NM_001081383|ens|ENSMUST00000045291|ref|XM_006535702|ref|XM_006535701	mm|chr5:24805451-24805392	0	NA	10908	TAGCTAATAGCAATGTCCCTTGTGGCCAAGACCCTGCTGTAACACAGGGACAGAATTATT	4234	0	A_51_P220323	Kmt2c	NM_001081383	ref|Mus musculus lysine (K)-specific methyltransferase 2C (Kmt2c), mRNA [NM_001081383]	1.13009	0.104595	0.760026	0.139905	3.66936	3	0	0	0	0.993642	1.22878	1.39144	1.24606	1.1013	1.0429	0.603	0.805667	0.871412	0.913204	0.915705	0.886876
1914	DATA	4369	27	105	ref|NM_198703|ref|NM_001185020|ref|NM_001185021|ref|NM_001199083	mm|chr6:119922819-119921070	0	NA	2389	TTGAAGGATGTATCCGACAAAACAAAGATGAAAGATATTCCATCAAAGACCTTTTGAACC	4236	0	A_52_P82209	Wnk1	NM_198703	ref|Mus musculus WNK lysine deficient protein kinase 1 (Wnk1), transcript variant 1, mRNA [NM_198703]	1.24734	0.170569	0.789504	0.360466	1.98851	2	0	0	0	0.772283	0.918473	0.66241	1.10561	1.19976	1.43664	1.00305	0.992142	0.373321	1.09375	1.13297	1.30959
1915	DATA	4372	27	108	ref|NM_031165|ens|ENSMUST00000127699|ens|ENSMUST00000140984|ens|ENSMUST00000117405	mm|chr9:40610620-40610679	0	NA	405	GGGGAGACAAAAAGTTTCTACCCAGAGGAAGTGTCCTCCATGGTTCTGACAAAGATGAAG	4242	0	A_66_P137434	Hspa8	NM_031165	ref|Mus musculus heat shock protein 8 (Hspa8), mRNA [NM_031165]	1.22029	0.144528	0.890641	0.0637802	3.61423	2	0	0	0	0.840801	0.940224	1.15033	1.2046	1.08424	1.37202	0.956169	0.828766	0.88699	0.946397	0.931995	0.857466
1920	DATA	4383	27	119	ref|NM_007985|ref|NM_001282942|ens|ENSMUST00000163091|ens|ENSMUST00000161977	mm|chr13:63412885-63412845	0	NA	2396	AGAAATGCTGCAAGGCACCACTATAGTGGAAGGAATGAGAGGTGGCCAGAGAAGGGTCAT	4260	0	A_51_P341647	Fancc	NM_007985	ref|Mus musculus Fanconi anemia, complementation group C (Fancc), transcript variant 1, mRNA [NM_007985]	1.00583	0.0995465	0.650779	0.109458	4.15644	3	0	0	0	2.29247	0.67127	1.34041	0.900976	1.01746	1.09905	0.732476	0.693448	0.526413	0.989688	0.915628	0.820722
1927	DATA	4396	27	132	ref|NM_001252625|ref|NM_029880|ens|ENSMUST00000150720|ens|ENSMUST00000128158	mm|chr12:85636248-85638982	0	NA	404	AAGTGAGGACTCTTTATCTCTCGGTGGATCCTTACATGCCCTGTAAAATGAACGAGGACA	4286	0	A_55_P2931966	Ptgr2	NM_001252625	ref|Mus musculus prostaglandin reductase 2 (Ptgr2), transcript variant 2, mRNA [NM_001252625]	0.833908	0.0555312	1.14372	0.0849103	5.28897	3	0	0	0	1.36545	0.951883	1.01787	0.857088	0.770542	0.874093	1.07307	1.12015	1.23792	0.885007	0.90658	0.940335
1933	DATA	4404	27	140	ref|NM_001199177|ref|NM_133752|ens|ENSMUST00000160597|ref|XM_006522655	mm|chr16:29654613-29654672	0	NA	5926	TTTGCCTGTGCTTGACCTAAGGTCATTTGTGTAGATGGGTAATTAAAGGATACTGAAGTG	4302	0	A_55_P2843001	Opa1	NM_001199177	ref|Mus musculus optic atrophy 1 (Opa1), transcript variant 1, mRNA [NM_001199177]	0.776245	0.154882	1.13721	0.010538	4.02734	2	0	0	0	1.31418	0.88327	0.867178	0.856577	0.874457	0.597701	1.13742	1.14764	1.12656	1.13716	1.03078	1.02708
1934	Mean	4406	27	142	ref|NM_011300|ens|ENSMUST00000190473|ens|ENSMUST00000187973|ens|ENSMUST00000104916	mm|chr12:29319146-29319087	0	NA	325	GAAAATCCAAGTCCAGCTAGTTCGTGAATTGGAGAAAAAGTTCAGTGGCAAGCACGTGGT	4306	0	A_55_P2055411	Rps7	NM_011300	ref|Mus musculus ribosomal protein S7 (Rps7), mRNA [NM_011300]	0.924269	0.0945264	1.1284	0.0414004	3.42613	2	0	0	0	1.1479	1.02168	0.87752	0.839705	0.906786	1.02632	1.09907	1.11036	1.17576	0.880142	0.945894	0.968867
1935	DATA	4407	27	143	ref|NM_013589|ens|ENSMUST00000002073|ens|ENSMUST00000110254|ref|XM_006515501	mm|chr12:86124226-86124167	0	NA	6538	AAATGCACTTCCATACAAGCTAGCTGGGGGTTCAGGAGCATGGGGGAATAAAATGTTCAT	4307	0	A_55_P1970105	Ltbp2	NM_013589	ref|Mus musculus latent transforming growth factor beta binding protein 2 (Ltbp2), mRNA [NM_013589]	1.44611	0.178754	0.760968	0.119763	5.51529	3	0	0	0	0.951228	0.553553	1.13423	1.47496	1.25469	1.60868	0.898791	0.682222	0.701891	0.913954	0.982605	0.843196
1941	DATA	4424	27	160	ref|NM_175171|ens|ENSMUST00000167058|ref|XM_006517693|ref|XM_006517694	mm|chr13:103525147-103525088	0	NA	8091	TTCGTGGTTCGGCAGAGAAGGGGCAAGGAGACCTTAAGGAGCAGTCCTCACAAAAAGGCC	4341	0	A_55_P2053551	Mast4	NM_175171	ref|Mus musculus microtubule associated serine/threonine kinase family member 4 (Mast4), mRNA [NM_175171]	1.25239	0.147893	0.872025	0.0678194	4.04924	2	0	0	0	0.614899	1.15523	1.17274	1.2298	1.1171	1.41029	0.882382	0.799623	0.934071	0.893398	0.9835	0.806967
1942	DATA	4425	27	161	ref|NM_001033219|ens|ENSMUST00000150409|ens|ENSMUST00000130765|ens|ENSMUST00000076224	mm|chr15:73436437-73436378	0	NA	488	CAAGAGAAGTAACTACAGCGCCTTCACAGTCATGATGATGAAACTGGTATTAACTGAGTG	4343	0	A_55_P2720015	Slc45a4	NM_001033219	ref|Mus musculus solute carrier family 45, member 4 (Slc45a4), transcript variant 1, mRNA [NM_001033219]	1.3113	0.393094	0.752502	0.115737	2.36192	2	0	0	0	0.417241	0.829745	0.991956	1.05891	1.11077	1.76422	0.625029	0.850998	0.781479	1.26517	1.24186	1.06263
1949	DATA	4442	28	14	ref|NM_001199136|ref|NM_001199137|ens|ENSMUST00000134458|ens|ENSMUST00000106224	mm|chr4:123110117-123110058	0	NA	15005	CCGAGATGAGAAGGCTGGGCTCAACCAGAACATGGATGCCATAACTGAGGAGCTACAGGC	4069	0	A_66_P105551	Macf1	NM_001199136	ref|Mus musculus microtubule-actin crosslinking factor 1 (Macf1), transcript variant 1, mRNA [NM_001199136]	1.06454	0.0920693	0.767271	0.0497292	4.92057	3	0	0	0	0.885013	1.15208	1.2641	1.13538	1.09778	0.960473	0.717883	0.766596	0.817334	1.09194	1.21368	0.897739
1954	DATA	4455	28	27	ref|NM_025292	mm|chr12:82593240-82593181	0	NA	10338	TGTGTCCAGATTTGCCTCTTGAACTATGACACTCAATAAAGACCTGTTTAACTTATTGAA	4088	0	A_55_P2141306	Synj2bp	NM_025292	ref|Mus musculus synaptojanin 2 binding protein (Synj2bp), mRNA [NM_025292]	1.05157	0.11125	0.800909	0.107722	2.80357	3	0	0	0	1.00374	0.739247	0.900983	1.0279	1.17275	0.954056	0.684041	0.822458	0.896228	1.06803	1.42437	1.3062
1956	DATA	4460	28	32	ref|NM_009150|ref|NM_019414|ens|ENSMUST00000090839|ens|ENSMUST00000090848	mm|chr3:94748621-94748680	0	NA	1625	TGTTTGTGCTTTTCTTAAGTGAGCTCCTGGAAGCACCAAGAAATAAAATGCTGAAACTTC	4097	0	A_55_P1961014	Selenbp1	NM_009150	ref|Mus musculus selenium binding protein 1 (Selenbp1), mRNA [NM_009150]	0.89936	0.0871744	1.07681	0.115431	2.12475	3	0	0	0	1.16477	1.09149	0.615797	0.889053	0.99123	0.817797	0.999439	1.20948	1.02149	1.08487	1.06927	1.0453
1957	DATA	4462	28	34	ref|NM_198100|ens|ENSMUST00000118375|ens|ENSMUST00000107615|ens|ENSMUST00000066078	mm|chr11:96997757-96997698	0	NA	3062	CTCGGCCAGCCGATGGCAGTGAACGCCACTGTCCATCGAATGTGCCATTCTGATCCAAAT	4101	0	A_52_P417846	Tbkbp1	NM_198100	ref|Mus musculus TBK1 binding protein 1 (Tbkbp1), mRNA [NM_198100]	1.27901	0.111566	0.705612	0.246458	3.67109	2	0	0	0	1.10798	1.10122	0.882541	1.40382	1.24425	1.18896	0.856984	0.838627	0.421225	0.883519	1.06313	1.00775
1958	DATA	4464	28	36	ref|NM_001293673|ref|NM_009145|ens|ENSMUST00000177380|ens|ENSMUST00000176126	mm|chr9:58475672-58475731	0	NA	487	GAATACCACTGTGTATATCATTTTGTCAGCGCTCCTAAAGCAAATGCCACCATTGAAGTG	4105	0	A_66_P107985	Nptn	NM_001293673	ref|Mus musculus neuroplastin (Nptn), transcript variant 2, mRNA [NM_001293673]	1.21645	0.165639	0.862244	0.185775	2.46493	3	0	0	0	0.820579	0.72936	0.895678	1.3156	1.02523	1.30852	0.942074	0.994761	0.649897	1.08637	1.20256	1.02936
1966	DATA	4487	28	59	ref|NM_183283|gb|AK009281|ens|ENSMUST00000093183|gb|BY657668	mm|chr16:32274806-32274865	0	NA	1207	TATGAGGCCCTGAGTTCAATCCCTGATACCACCAAATACATAATAAAGAAATTTATATGG	4149	0	A_55_P1956403	Smco1	NM_183283	ref|Mus musculus single-pass membrane protein with coiled-coil domains 1 (Smco1), mRNA [NM_183283]	0.886923	0.112819	1.18179	0.16068	2.60134	3	0	0	0	0.902178	0.948344	0.890962	1.00898	0.865326	0.786464	1.02565	1.17306	1.34666	1.15999	0.935425	0.956956
1967	DATA	4495	28	67	ref|NM_172925|ens|ENSMUST00000057781|gb|AK085911|gb|AK036669	mm|chr9:77506749-77506808	0	NA	5076	GCACTGCCATTAAGGACAAAAATGCAAGAAGATGCAATACGTTCTGTACCCTTCAAAGTC	4163	0	A_52_P176999	Klhl31	NM_172925	ref|Mus musculus kelch-like 31 (Klhl31), mRNA [NM_172925]	0.952744	0.162952	1.29116	0.185104	2.37685	3	0	0	0	1.07518	0.666953	0.608957	0.796799	0.939534	1.1219	1.24595	1.13285	1.49468	0.926646	1.03813	0.952422
1969	DATA	4498	28	70	ref|NM_001251849|ens|ENSMUST00000177684|ref|XM_006527428|ref|XM_006527429	mm|chr19:11071838-11071779	0	NA	1061	CACCCTCCCCAGTAATGTTCCCCTTGAACAAGTATACCAAGATGTAGCCCAGAAATAGTT	4169	0	A_66_P114152	Ms4a18	NM_001251849	ref|Mus musculus membrane-spanning 4-domains, subfamily A, member 18 (Ms4a18), mRNA [NM_001251849]	0.891541	0.230945	1.4129	0.361947	2.10323	3	0	0	0	0.785134	0.605397	1.14016	0.658858	0.895057	1.12071	1.27756	1.13813	1.82301	0.873769	0.810002	0.872221
1974	DATA	4512	28	84	ref|NM_026353|gb|AK207569|gb|AK212823|gb|AK218543	mm|chr15:97621662-97621721	0	NA	1064	TGACAATTGGCTCCTTCCCTAAGCAGCACAGTTGGACAGAATCCAGCGTCCGTCCGTCCT	4197	0	A_52_P528505	Slc48a1	NM_026353	ref|Mus musculus solute carrier family 48 (heme transporter), member 1 (Slc48a1), mRNA [NM_026353]	0.929343	0.117681	1.16929	0.0454023	3.29481	2	0	0	0	0.948579	0.982353	0.817005	0.889319	1.06182	0.836896	1.13113	1.15723	1.2195	0.987119	0.872328	1.09673
1978	DATA	4519	28	91	ref|XM_011248237|gb|AK010593|gb|AK010835|tc|TC1676913	mm|chr5:124895704-124897248	0	NA	191	CGGCCGCGCCGCCATGGGCCTAGCCGGGCTGCAGGAGAACGTGTTTGCTGGGCAGTCAAA	4211	0	A_66_P108055	Setd8	XM_011248237	ref|PREDICTED: Mus musculus SET domain containing (lysine methyltransferase) 8 (Setd8), transcript variant X2, mRNA [XM_011248237]	1.14704	0.0239056	0.834464	0.135962	3.9218	2	0	0	0	0.828995	1.48042	1.13814	1.1658	1.15519	1.12012	0.991127	0.764979	0.747286	0.92518	0.918103	0.764657
1980	DATA	4522	28	94	ref|NM_019653|ens|ENSMUST00000131848|ens|ENSMUST00000145772|ens|ENSMUST00000137890	mm|chr11:79058030-79057971	0	NA	948	TGGGTGTACAGTTGTGCATTCTCTCCCGACTGTTCTATGCTGTGTTCAGTTGGCGCCAGT	4217	0	A_66_P123834	Wsb1	NM_019653	ref|Mus musculus WD repeat and SOCS box-containing 1 (Wsb1), transcript variant 1, mRNA [NM_019653]	1.14076	0.0530639	0.770805	0.23836	2.62403	2	0	0	0	0.824461	1.16273	1.58493	1.09939	1.12229	1.20059	0.52789	0.780192	1.00433	0.758277	0.901604	1.03332
1984	DATA	4529	28	101	ens|ENSMUST00000134941|gb|AK086865|gb|AK162238|tc|TC1610241	mm|chr16:11661480-11661539	0	NA	1405	GGATAGAAGTACTTAAATAACGGTACCACTGGGCATTGCTTACAAGATTTTTTAAAATGC	4229	0	A_55_P2065726	Snx29	ENSMUST00000134941	ens|sorting nexin 29 [Source:MGI Symbol;Acc:MGI:1921728] [ENSMUST00000134941]	1.18433	0.0719233	0.502171	0.21543	5.20225	2	0	0	0	0.946785	1.14703	1.28252	1.18504	1.11205	1.25589	0.394579	0.750204	0.36173	0.806488	1.49749	1.26019
1985	DATA	4532	28	104	ref|NM_133992|ref|NM_001252326|ref|NM_001252327|ens|ENSMUST00000005825	mm|chr10:127757918-127757977	0	NA	3953	TACAGATGGTGCTATTAATAGAACTGGAAAGCAGCAAAATTGTTGCAAAGGTTCTAGCTG	4235	0	A_51_P402261	Pan2	NM_133992	ref|Mus musculus PAN2 polyA specific ribonuclease subunit homolog (S. cerevisiae) (Pan2), transcript variant 1, mRNA [NM_133992]	0.995113	0.174959	0.717847	0.0531779	2.62624	2	0	0	0	1.05609	1.24587	0.835558	1.06069	1.12781	0.796839	0.700489	0.777535	0.675517	1.19402	1.32028	1.20929
1988	DATA	4540	28	112	ref|NM_013748|ens|ENSMUST00000171633|ens|ENSMUST00000169819|gb|BC125637	mm|chr5:39159373-39159314	0	NA	456	CTCCCCTTCTGTTACCTCCCAAGGCTTCTGTCTCCACTGAGAGACAAACCAGGGATGTGA	4249	0	A_52_P646515	Clnk	NM_013748	ref|Mus musculus cytokine-dependent hematopoietic cell linker (Clnk), mRNA [NM_013748]	0.718333	0.266631	1.7033	0.433428	3.35253	3	0	0	0	0.308471	0.586399	0.815366	0.578096	0.551086	1.02582	1.5875	1.33954	2.18287	1.24953	0.694059	1.08127
1991	DATA	4547	28	119	ref|NM_007498|ens|ENSMUST00000027941|ens|ENSMUST00000195117|gb|AK156786	mm|chr1:192994606-192994547	0	NA	1545	CACAGCAGCTTTGTCCTTGGCTACAAACTGTTACAACGTCACACAATGAAGGCACAAAGT	4261	0	A_52_P452689	Atf3	NM_007498	ref|Mus musculus activating transcription factor 3 (Atf3), mRNA [NM_007498]	2.71062	2.2237	0.333044	0.338199	1.83085	2	0	0	0	0.930931	0.181352	0.427397	1.28166	1.57755	5.27264	0.322757	0.676269	0.000106054	0.467344	0.444807	0.417189
1994	DATA	4556	28	128	ref|NM_012006|ens|ENSMUST00000168120|gb|Y14004|gb|BC022951	mm|chr12:85358452-85358511	0	NA	1390	TATCAAAATAGTGCTGATTCAAGGGCTGGGAATGGAGTTTCATTGTCAAGTCCTTGACTG	4279	0	A_51_P451574	Acot1	NM_012006	ref|Mus musculus acyl-CoA thioesterase 1 (Acot1), mRNA [NM_012006]	0.379812	0.0671483	1.4755	0.220781	8.22387	2	0	0	0	2.13674	1.99619	0.754623	0.315019	0.375327	0.44909	1.24678	1.49235	1.68738	0.510622	0.499612	0.536263
1996	DATA	4558	28	130	ref|NM_134082|ens|ENSMUST00000153607|ens|ENSMUST00000026635|ref|XM_006518915	mm|chr14:121629888-121629947	0	NA	810	CAAGGCAGGCTGACGTGTAACGACACCAGTGCCGCTCTCTTGATCTCACACATTGTACAG	4283	0	A_55_P2076984	Farp1	NM_134082	ref|Mus musculus FERM, RhoGEF (Arhgef) and pleckstrin domain protein 1 (chondrocyte-derived) (Farp1), mRNA [NM_134082]	1.45943	0.888447	0.716763	0.131795	1.43217	2	0	0	0	0.740996	0.714217	1.6446	1.00384	2.48325	0.891185	0.85591	0.593819	0.700559	0.882743	0.77326	0.715615
2000	DATA	4564	28	136	ref|NM_172707|ens|ENSMUST00000015100|gb|AK166168|gb|AK166416	mm|chr5:32794896-32794955	0	NA	2834	TATGTGTTACCATAGATGTGTGAAACCTTATAGCGTCCTTGAAAGTGTTAAATTGAGAAC	4295	0	A_51_P342716	Ppp1cb	NM_172707	ref|Mus musculus protein phosphatase 1, catalytic subunit, beta isoform (Ppp1cb), mRNA [NM_172707]	0.763968	0.20131	1.18057	0.0633505	3.41909	2	0	0	0	1.37629	0.960738	0.843302	0.801137	0.944102	0.546664	1.1275	1.16349	1.25071	0.950114	1.02415	1.0118
2010	DATA	4587	28	159	ref|NM_027052|ens|ENSMUST00000166223|ens|ENSMUST00000023101|ref|XM_006521349	mm|chr15:96827315-96827256	0	NA	1870	CGTTTTTCTAGCTCTATCATGGGATACTTGTGGAAGAGAAAATTATGGGTTTTGTTGGGA	4340	0	A_55_P2630393	Slc38a4	NM_027052	ref|Mus musculus solute carrier family 38, member 4 (Slc38a4), mRNA [NM_027052]	0.850399	0.207721	1.4094	0.316456	2.55775	3	0	0	0	0.853382	1.45896	1.02943	0.634658	0.867493	1.04905	1.77457	1.21528	1.23834	0.696266	0.551368	0.631217
2013	DATA	4593	29	1	ens|ENSMUST00000189846|gb|AK172645|gb|AK138707|gb|BB068332	mm|chr1:66847398-66847339	0	NA	1517	TCACCCAATTTTGTATTCTTTCTTTCTTTCAAAAAATAAAACAGAAGAAACAACAAAAAA	4351	0	A_55_P2926122	Kansl1l	ENSMUST00000189846	ens|KAT8 regulatory NSL complex subunit 1-like [Source:MGI Symbol;Acc:MGI:1915941] [ENSMUST00000189846]	1.11153	0.216126	0.531318	0.462498	1.96855	2	0	0	0	1.74524	0.413233	1.33856	1.04118	1.35406	0.939338	0.748172	0.845543	0.000238461	1.10994	1.21754	1.24695
2024	DATA	4630	29	38	ref|NM_144903|ens|ENSMUST00000029987|gb|BC036133|gb|BC030725	mm|chr4:49549467-49549408	0	NA	1352	CCAGTTCCCTATGTTCCAGAACATTCATCCAAGAAAAGAACAGGCCACGACTGAGAAAAG	4418	0	A_51_P337269	Aldob	NM_144903	ref|Mus musculus aldolase B, fructose-bisphosphate (Aldob), mRNA [NM_144903]	1.18387	0.11816	0.755574	0.215214	3.02152	3	0	0	0	0.715546	0.486963	1.05237	1.05466	1.21053	1.28643	0.539683	0.970106	0.756932	1.29305	1.45605	1.17768
2028	DATA	4635	29	43	ref|NM_011432|ens|ENSMUST00000071006|ens|ENSMUST00000137581|gb|AK137213	mm|chr17:27988766-27988825	0	NA	613	GTGCTGAGCCCGAGTGTTTACTAGATGCATGGAAAGGAAACTTCCCTTCCTAACTGAATA	4428	0	A_51_P157595	Snrpc	NM_011432	ref|Mus musculus U1 small nuclear ribonucleoprotein C (Snrpc), mRNA [NM_011432]	1.08298	0.0855489	0.95021	0.0485101	2.33837	3	0	0	0	0.945715	0.880429	1.09121	1.00253	1.07356	1.17285	0.998087	0.951454	0.901091	0.969103	1.03195	0.982016
2032	DATA	4643	29	51	ref|NM_019400|ref|NM_001291143|ref|NM_001291142|ref|NM_001291141	mm|chr11:70748682-70751082	0	NA	2482	CAGTTGGAATCTACATTAAGAGAGAAGTCGCAACAACTTGAGAGTCTCCAAGAAATGAAA	4442	0	A_52_P439129	Rabep1	NM_019400	ref|Mus musculus rabaptin, RAB GTPase binding effector protein 1 (Rabep1), transcript variant 1, mRNA [NM_019400]	1.28068	0.0989393	0.993916	0.196762	2.25529	2	0	0	0	0.692667	0.415096	0.629488	1.21741	1.22994	1.3947	1.20055	0.9724	0.808796	1.14587	1.12005	1.17303
2036	DATA	4653	29	61	ref|NM_001302469|ens|ENSMUST00000105579|ens|ENSMUST00000124872|ens|ENSMUST00000105578	mm|chr4:155374811-155374870	0	NA	681	TTTTTGGCAAGCAAAGGCCACAATGAAAGGGAGATTGCTGAAGCCATCAAGAACCATGAG	4462	0	A_55_P2055232	Sdf4	NM_001302469	ref|Mus musculus stromal cell derived factor 4 (Sdf4), transcript variant 4, mRNA [NM_001302469]	0.807419	0.0804812	1.40557	0.256193	3.85805	2	0	0	0	1.3395	0.773543	0.555002	0.843891	0.863208	0.715159	1.69369	1.31961	1.20342	0.854414	0.888291	0.950278
2037	DATA	4655	29	63	ref|NM_183162|ens|ENSMUST00000149417|ens|ENSMUST00000108831|ref|XM_006500599	mm|chr2:180962496-180962437	0	NA	9932	AGTGAAATATACACCAGGACATCTGGGGCTTCTAAGGCCTGGCTGCAGAACCTCCTGTGA	4466	0	A_55_P1959953	Helz2	NM_183162	ref|Mus musculus helicase with zinc finger 2, transcriptional coactivator (Helz2), mRNA [NM_183162]	1.22117	0.39721	0.694497	0.0499126	2.27867	2	0	0	0	1.16828	1.20977	1.11786	1.58387	1.28296	0.796692	0.645297	0.693101	0.745093	0.837694	0.944291	0.975092
2038	DATA	4656	29	64	ref|NM_001164724|ref|NM_133775|ens|ENSMUST00000120388|ens|ENSMUST00000025724	mm|chr19:30035101-30035160	0	NA	2450	GTGAATCTGTACGATATCTTTAAAGTAGTAACTACGTAGTCAAATGTGTTCTTGACGTTG	4468	0	A_55_P1964960	Il33	NM_001164724	ref|Mus musculus interleukin 33 (Il33), transcript variant 1, mRNA [NM_001164724]	0.770142	0.236743	1.4061	0.226439	3.36236	3	0	0	0	1.25679	0.334771	0.852592	0.679591	0.59204	1.03879	1.30375	1.24891	1.66565	0.943099	0.840047	1.24398
2041	DATA	4663	29	71	ref|NM_145355|ref|NM_001290472|ref|NM_001290473|ref|NR_110959	mm|chr11:3316048-3315989	0	NA	3435	GACCAGCCACTGATTTTCACTGTTGTGAAAGTGATTTGACTTAGAATTAAATGGTTTTAC	4481	0	A_55_P2117711	Rnf185	NM_145355	ref|Mus musculus ring finger protein 185 (Rnf185), transcript variant 1, mRNA [NM_145355]	0.900383	0.182534	1.16846	0.102943	2.21572	3	0	0	0	1.12493	0.577462	1.23664	0.996429	1.01484	0.689879	1.17058	1.06448	1.27033	0.940909	0.943281	0.970235
2045	DATA	4674	29	82	ref|NM_001081090|ens|ENSMUST00000151317|ens|ENSMUST00000137005|ens|ENSMUST00000046030	mm|chr2:139984342-139984283	0	NA	1381	ACCAGTTCAAACGATTGAAATACTATTATGCAGTAGCGGAGTGTGATTCTCCTGAAACAG	4500	0	A_52_P217172	Esf1	NM_001081090	ref|Mus musculus ESF1, nucleolar pre-rRNA processing protein, homolog (S. cerevisiae) (Esf1), mRNA [NM_001081090]	0.746708	0.37596	1.27211	0.0833258	2.36319	2	0	0	0	1.12101	1.28762	0.442008	0.800074	1.09313	0.346917	1.33086	1.30873	1.17675	1.06239	0.998453	1.03206
2051	DATA	4683	29	91	ens|ENSMUST00000129611|gb|AK031544|tc|TC1617397|riken|6030449K06	mm|chr1:45381765-45381824	0	NA	3060	CATGATAGCTATGAGGTTTGGAGTTGACTGACATGGTTATTGTAGAAACTTATACCATAA	4517	0	A_55_P2717454	Col3a1	ENSMUST00000129611	ens|collagen, type III, alpha 1 [Source:MGI Symbol;Acc:MGI:88453] [ENSMUST00000129611]	0.191136	0.330346	0.961155	0.182036	3.53599	3	0	0	0	1.49998	2.92435	0.981284	0.000410579	0.572587	0.000410579	1.01037	0.759572	1.11353	1.57389	0.913881	0.649742
2061	DATA	4701	29	109	ref|NM_026526|ens|ENSMUST00000022518|ref|XM_006519483|gb|AK005312	mm|chr14:58168597-58168538	0	NA	673	CTGGACTGTGAAGCCTAAATTCACATGGCAGCAGTTCCATAGAGGACTCCACATTCATTT	4548	0	A_51_P376149	N6amt2	NM_026526	ref|Mus musculus N-6 adenine-specific DNA methyltransferase 2 (putative) (N6amt2), mRNA [NM_026526]	1.13295	0.179003	0.951256	0.0747951	1.62219	2	0	0	0	0.868477	0.952569	1.1467	1.06145	1.00075	1.33665	0.998205	0.99056	0.865003	0.938206	0.89396	0.947472
2063	DATA	4706	29	114	ref|NM_028275|ref|XM_011245223|ref|XM_006519680|gb|AK007175	mm|chr14:23875251-23875310	0	NA	851	CTCTGAAGCTAAACTCTGCACGCCTTAGCCTGTTTCATGACAATAAAGTGGAAAAGCAAG	4558	0	A_55_P2487834	1700112E06Rik	NM_028275	ref|Mus musculus RIKEN cDNA 1700112E06 gene (1700112E06Rik), mRNA [NM_028275]	1.44384	0.307269	0.825763	0.0275906	3.47008	2	0	0	0	0.507965	0.561862	1.14707	1.304	1.23136	1.79616	0.798637	0.853795	0.824856	0.94741	0.953625	1.07326
2069	DATA	4718	29	126	ref|NM_007702|ens|ENSMUST00000025404|gb|AF041376|gb|BC096649	mm|chr18:67527351-67527410	0	NA	1066	CGGAGTGTGTGGGAACTGCGTGGATACGAATCAGTTTCTTTGGATCCTTACATACTGTAA	4579	0	A_51_P199168	Cidea	NM_007702	ref|Mus musculus cell death-inducing DNA fragmentation factor, alpha subunit-like effector A (Cidea), mRNA [NM_007702]	0.927313	0.0508588	1.11071	0.104833	2.72617	2	0	0	0	1.20733	1.01226	1.04314	0.912216	0.885712	0.984011	1.03993	1.06105	1.23114	0.88979	0.905517	0.827898
2072	DATA	4727	29	135	ref|NM_009072|ens|ENSMUST00000020904|ref|XM_006515019|ref|XM_006515020	mm|chr12:16984727-16984785	0	NA	4193	ATTGTTATTAGCAAATTCAACAGAAGAACAGCAGAAATGGGTTAGTCGGTTGGTGAAAAA	4597	0	A_51_P320444	Rock2	NM_009072	ref|Mus musculus Rho-associated coiled-coil containing protein kinase 2 (Rock2), mRNA [NM_009072]	0.985719	0.0347439	0.86546	0.035288	4.20613	3	0	0	0	1.08764	0.925975	1.03518	0.991959	1.01692	0.948278	0.832256	0.861608	0.902516	1.07216	1.28617	1.03934
2074	DATA	4731	29	139	ref|NM_001039474|ref|NM_001289526|ref|NR_110344|ens|ENSMUST00000173642	mm|chr18:42734432-42734491	0	NA	3401	TTCAGGTTTTTACATATATGCATTAGTCAACCTATTGCAAAATCACCTGACGAACAGAAG	4604	0	A_66_P104972	Tcerg1	NM_001039474	ref|Mus musculus transcription elongation regulator 1 (CA150) (Tcerg1), transcript variant 1, mRNA [NM_001039474]	0.652147	0.180947	1.19974	0.236999	3.18082	3	0	0	0	1.20101	1.74481	0.647901	0.833094	0.471201	0.652147	1.00048	1.13691	1.46182	0.472296	1.64112	0.73721
2077	DATA	4736	29	144	ref|NM_001290196|ref|NM_001177832|ens|ENSMUST00000071320|ens|ENSMUST00000092528	mm|chr13:66532929-66532870	0	NA	525	AGTGGTCTCAGATATCATAAAAGAACCCATACTGGAGAGAAACCTTATGAATGTAATCAA	4614	0	A_55_P1959152	2410141K09Rik	NM_001290196	ref|Mus musculus RIKEN cDNA 2410141K09 gene (2410141K09Rik), transcript variant 1, mRNA [NM_001290196]	0.806426	0.0791325	1.2877	0.049173	8.94734	3	0	0	0	0.422132	1.05418	0.776666	0.829327	0.871581	0.718368	1.29364	1.33363	1.23582	1.25799	1.04985	1.15681
2082	DATA	4744	29	152	ref|NM_009686|ref|NM_001201414|ref|NM_001201413|ref|NM_001201415	mm|chr5:66690393-66690334	0	NA	6241	AGTTGGCCCAGTTTAACCTAACATCTGATGTGTTTACAGCCAGTTAAAAAAGAAAAGTAA	4630	0	A_65_P15418	Apbb2	NM_009686	ref|Mus musculus amyloid beta (A4) precursor protein-binding, family B, member 2 (Apbb2), transcript variant 1, mRNA [NM_009686]	1.05914	0.0395505	0.987495	0.0102553	3.03702	2	0	0	0	0.446747	1.08743	1.07931	1.0716	1.09095	1.01486	0.988615	0.997144	0.976725	1.10801	1.06078	1.07783
2086	DATA	4752	29	160	ref|NM_013759|ens|ENSMUST00000115262|gb|AF195142|tc|TC1575517	mm|chr17:24879663-24879722	0	NA	825	CCCCTTGATTGCTCTCTGGGATGATCAAGTAGAAGTCAATAAACATGCAGCCTGAGCCGT	4645	0	A_55_P1990919	Msrb1	NM_013759	ref|Mus musculus methionine sulfoxide reductase B1 (Msrb1), mRNA [NM_013759]	1.26161	0.18416	0.884007	0.127247	2.92176	3	0	0	0	0.586397	0.644861	1.12506	1.10093	1.22131	1.46258	1.01707	0.871434	0.763513	1.0811	1.15387	0.971876
2089	DATA	4759	30	3	ref|NM_001111053|ref|NM_001195540|ens|ENSMUST00000167204|ens|ENSMUST00000199585	mm|chr3:55275120-55275179	0	NA	5906	TCGTTTCCTCGGAAAATGCTGTACCTTGTGTTTGACATGCAACCATGTTACCCTTTCCTG	4356	0	A_55_P2505946	Dclk1	NM_001111053	ref|Mus musculus doublecortin-like kinase 1 (Dclk1), transcript variant 4, mRNA [NM_001111053]	0.860605	0.0594451	1.35698	0.123558	6.27032	2	0	0	0	0.924681	0.608329	1.14796	0.815855	0.837905	0.928056	1.30441	1.26841	1.49813	0.853655	1.03231	0.780305
2092	DATA	4763	30	7	ref|NM_001081365|ens|ENSMUST00000152804|tc|TC1691942|tc|TC1719598	mm|chr18:36552965-36553024	0	NA	535	AGCCAAGACCCAGTTCTCTCGCAGCCGCTGCTCCTGTTGCTGAATAAACAACTAGTGTTA	4363	0	A_55_P2002846	Cystm1	NM_001081365	ref|Mus musculus cysteine-rich transmembrane module containing 1 (Cystm1), mRNA [NM_001081365]	1.2588	0.0487924	0.872499	0.187125	3.45993	2	0	0	0	0.764627	0.730626	1.19037	1.20312	1.29408	1.27919	1.07468	0.837425	0.705393	0.939304	1.09133	0.889847
2095	DATA	4770	30	14	ref|NM_018820|ens|ENSMUST00000008528|ref|XM_006540217|gb|AF218291	mm|chr7:28274990-28275049	0	NA	844	TAGGACCCAGGGAGAATTGACTTGGATCTGAGTTGAGCCTGGTGGTGACACCAACCCACT	4376	0	A_51_P436878	Sertad1	NM_018820	ref|Mus musculus SERTA domain containing 1 (Sertad1), mRNA [NM_018820]	1.17872	0.158835	0.899474	0.153042	2.19282	3	0	0	0	1.13911	0.828461	1.08881	1.15271	1.34895	1.03449	0.967912	1.00636	0.724156	0.883293	0.888034	0.937713
2097	DATA	4772	30	16	gb|AK034388|gb|AK149102|gb|AK032136|gb|AK170555	mm|chr5:92870651-92870592	0	NA	1997	TTTCACTTCCTTGTGCTTTACAAAGATCACTAACGGTCAAATGGGACAAGCACTACACAA	4379	0	A_65_P18727	Scarb2	AK034388	gb|Mus musculus adult male diencephalon cDNA, RIKEN full-length enriched library, clone:9330185J12 product:unclassifiable, full insert sequence. [AK034388]	0.790002	0.119403	1.25888	0.132637	4.55057	3	0	0	0	1.39817	0.705278	0.996753	0.65242	0.851016	0.866571	1.11259	1.29276	1.37129	0.881673	0.837877	1.0336
2098	DATA	4776	30	20	ref|NM_011980|ens|ENSMUST00000062181|ref|XM_011238063|gb|BC127039	mm|chr7:30947387-30947328	0	NA	929	AGAAGGAAAACTTGCTTACGCATCAGAAAATTCACACTGGAGAGAAACCTTTTGAGTGCA	4387	0	A_52_P5803	Zfp146	NM_011980	ref|Mus musculus zinc finger protein 146 (Zfp146), mRNA [NM_011980]	0.966443	0.215735	1.27523	0.139929	2.07994	3	0	0	0	1.12668	0.310141	0.719	1.04683	1.13044	0.722055	1.25173	1.14854	1.42542	1.04783	1.04501	1.02632
2104	DATA	4788	30	32	ref|NM_178888|ens|ENSMUST00000137381|ens|ENSMUST00000102810|ref|XM_006498481	mm|chr2:32841974-32841915	0	NA	3298	GTCGGTCCCCTTGTAATAAAGGTGGTAGATTTCATTAAGGTTTTAGATCAAAACTTTGAA	4407	0	A_55_P2114133	Garnl3	NM_178888	ref|Mus musculus GTPase activating RANGAP domain-like 3 (Garnl3), mRNA [NM_178888]	0.819136	0.118245	1.24332	0.387924	1.81165	2	0	0	0	0.873866	1.212	0.725594	0.915832	0.854271	0.687306	0.972176	1.07011	1.68767	1.00953	1.01658	0.975066
2109	DATA	4807	30	51	ens|ENSMUST00000182215|tc|TC1760593	mm|chr9:107645723-107645664	0	NA	571	AAATGATAAACAGGGCTGAGAACTAAGGTTTACTAGTCTGTCGTGCCTGTGGGGTTAGTG	4443	0	A_55_P2715869	Rbm5	ENSMUST00000182215	ens|RNA binding motif protein 5 [Source:MGI Symbol;Acc:MGI:1933204] [ENSMUST00000182215]	1.04732	0.284871	0.549316	0.475756	1.55553	3	0	0	0	1.31027	1.16529	1.0834	0.903317	0.863207	1.37545	0.802624	0.844823	0.000501379	0.530877	1.28562	1.83463
2129	DATA	4847	30	91	ref|NM_146191|ens|ENSMUST00000137181|ens|ENSMUST00000015277|ref|XM_006540839	mm|chr7:73403722-73403663	0	NA	7364	AAATTATAAAAAAGAAAACGTTAAGATGTGCCGCGGGGTGCGCATGCTGGTGAGACTGGT	4518	0	A_55_P2056674	Lrrk1	NM_146191	ref|Mus musculus leucine-rich repeat kinase 1 (Lrrk1), mRNA [NM_146191]	1.10358	0.0409947	0.804726	0.0947923	5.01205	2	0	0	0	0.872933	1.22848	1.22922	1.0585	1.1136	1.13863	0.874894	0.842394	0.696889	1.02096	0.91085	1.01265
2130	DATA	4853	30	97	gb|AK086245|tc|TC1703491|tc|TC1681802|riken|D930016C10	mm|chr11:116957008-116956949	0	NA	491	CTTCTTTCAGAGCTTTGGTTTACTGTCTTGGACTTTACAGATGGGACCAACAATACATCC	4526	0	A_66_P101624	Gm11730	AK086245	gb|Mus musculus 15 days embryo head cDNA, RIKEN full-length enriched library, clone:D930016C10 product:unclassifiable, full insert sequence. [AK086245]	1.14419	0.0501766	1.03454	0.0687455	2.2314	3	0	0	0	0.977718	1.19656	0.81887	1.13046	1.19981	1.10231	1.07417	1.0743	0.955164	0.684396	0.981747	0.804506
2131	DATA	4854	30	98	gb|AK171865|riken|F830015I20	mm|chr13:3593028-3592969	0	NA	1381	ATCTATGTACTACAACTTTGTGTTTGGACCATGTATTCCCAACATGGTATTGACCCTGAG	4528	0	A_65_P15385	Fam208b	AK171865	gb|Mus musculus activated spleen cDNA, RIKEN full-length enriched library, clone:F830015I20 product:hypothetical protein, full insert sequence. [AK171865]	1.24768	0.00767972	0.619523	0.272564	3.99011	2	0	0	0	1.10802	1.08331	0.751195	1.2416	1.25631	1.24513	0.393015	0.922018	0.543537	1.04977	1.18805	1.21806
2133	Mean	4860	30	104	ens|ENSMUST00000121482|ens|ENSMUST00000118818|nap|NAP061265-1|nap|NAP115275-1	mm|chrX:151938830-151938771	0	NA	637	TGAAAATTCCCAAACACCTGACTGACACTTACTTCAAGAAGAAGCAGCTGTGCAAGCCCA	4539	0	A_55_P1955346	ENSMUST00000121482	ENSMUST00000121482	ens|predicted gene 8606 [Source:MGI Symbol;Acc:MGI:3646345] [ENSMUST00000121482]	0.939447	0.0401167	1.0434	0.0252007	3.80061	3	0	0	0	1.05234	1.04505	0.997205	0.919048	0.913628	0.985664	1.01755	1.0679	1.04476	0.959949	0.959057	1.03785
2135	DATA	4862	30	106	ref|NM_174988|ens|ENSMUST00000065438|ref|XM_011239238|ref|XM_006498534	mm|chr2:164937545-164937486	0	NA	3047	TGATGACCAATGTCAGGAAAAAGGAGGGGAACCTGGCCTGTGCGGATCTGGGGTTGGACA	4543	0	A_55_P2743475	Cdh22	NM_174988	ref|Mus musculus cadherin 22 (Cdh22), mRNA [NM_174988]	1.51678	0.540406	0.588346	0.51057	2.16302	3	0	0	0	0.743073	0.278448	0.968542	1.08427	1.34351	2.12258	0.918487	0.846284	0.000265779	1.10963	1.40309	1.18183
2136	DATA	4863	30	107	ref|NM_009817|ref|NM_001301157|ref|NM_001301153|ref|NM_001301155	mm|chr13:74841644-74841585	0	NA	1936	AAAGAACTTGATGATGCCTTGGATGAACTTTCTGACAGTCTTGGACAAAGGCCGCCTGAT	4545	0	A_52_P279658	Cast	NM_009817	ref|Mus musculus calpastatin (Cast), transcript variant 2, mRNA [NM_009817]	1.0871	0.139427	0.949566	0.0132979	1.7008	2	0	0	0	0.854535	1.0572	1.26294	1.02172	0.992378	1.2472	0.941246	0.964903	0.94255	0.926903	0.959687	0.828736
2137	DATA	4864	30	108	ref|NM_011200|ref|NR_002688|ens|ENSMUST00000076587|ens|ENSMUST00000027232	mm|chr1:30998558-30998499	0	NA	2718	GTAGCTCTGCAATTTCCAGACCAGTTTTCTCATTTTTAAGTTCATTACATGCCTGTATAT	4547	0	A_55_P1990780	Ptp4a1	NM_011200	ref|Mus musculus protein tyrosine phosphatase 4a1 (Ptp4a1), mRNA [NM_011200]	0.822041	0.218528	1.29186	0.263998	2.37447	3	0	0	0	1.14822	1.22648	1.12227	0.658233	0.737724	1.07017	1.09149	1.19309	1.591	0.693446	0.755787	0.712097
2143	Mean	4880	30	124	ref|NM_001099636|ens|ENSMUST00000094807|tc|TC1662386|tc|TC1609101	mm|chr7:17534109-17534168	0	NA	4078	GGTACCTGTCCTTGTGTGCTGTGTGATCTGGGATCCTCAAATGAAACAATGAAGCATCTT	4576	0	A_65_P01437	Pnmal2	NM_001099636	ref|Mus musculus PNMA-like 2 (Pnmal2), mRNA [NM_001099636]	0.865634	0.0515897	1.09376	0.0461551	5.70809	3	0	0	0	0.906197	1.1064	1.11149	0.881428	0.807994	0.907481	1.04219	1.10793	1.13118	0.932962	0.982949	1.08182
2149	DATA	4892	30	136	ref|NM_011349|ens|ENSMUST00000080560|ref|XM_006511675|ref|XM_011242868	mm|chr9:107583892-107583833	0	NA	3333	CTACCCAGGCCACAGCCACTCTTGGGTTCCATCTTGCTAATAAATGCTGGCTCTGGGACT	4599	0	A_55_P1998442	Sema3f	NM_011349	ref|Mus musculus sema domain, immunoglobulin domain (Ig), short basic domain, secreted, (semaphorin) 3F (Sema3f), mRNA [NM_011349]	1.25697	0.294609	0.78808	0.0767759	2.66755	2	0	0	0	1.04716	0.894038	1.05954	1.58009	1.18754	1.00327	0.872673	0.722814	0.768754	1.00929	0.926738	0.928092
2151	DATA	4897	30	141	ref|NM_001291865|ref|NM_009121|ens|ENSMUST00000134855|ens|ENSMUST00000150046	mm|chrX:151647908-151647849	0	NA	1038	TGTTGCATGTTTGAAATTCGGTCTGTTTAAAGTGGCAGTCATGTATGTGGTTTGGAGGCA	4609	0	A_55_P2714414	Sat1	NM_001291865	ref|Mus musculus spermidine/spermine N1-acetyl transferase 1 (Sat1), transcript variant 2, mRNA [NM_001291865]	1.18652	0.118022	0.861602	0.0306258	4.61548	2	0	0	0	1.1975	0.804941	1.0465	1.28309	1.2215	1.05496	0.859829	0.893076	0.831901	1.00757	0.886607	0.91254
2156	DATA	4918	30	162	ref|NM_139304|ens|ENSMUST00000200373|ens|ENSMUST00000049382|ens|ENSMUST00000199607	mm|chr3:90155993-90158230	0	NA	1169	CGAGTTTATCTACATGGTAGGCTTGGAAGAAGTTGTACAGAGTGTCATTGACAGCCAAGG	4650	0	A_55_P2735230	Gatad2b	NM_139304	ref|Mus musculus GATA zinc finger domain containing 2B (Gatad2b), mRNA [NM_139304]	1.12401	0.0610951	0.820639	0.126933	3.73006	2	0	0	0	0.631517	1.27724	1.24053	1.07533	1.19257	1.10414	0.744122	0.750635	0.967161	1.01157	1.13493	0.870247
2180	DATA	4965	31	45	ref|NM_025794|ens|ENSMUST00000029386|gb|AK002483|gb|AK169686	mm|chr3:79407865-79407806	0	NA	2125	GTATGCCAAACTAACTTCCTGTATGTTTAGATAACTTCTGAACAAGTGTCCTTCAAACAT	4738	0	A_55_P1973723	Etfdh	NM_025794	ref|Mus musculus electron transferring flavoprotein, dehydrogenase (Etfdh), mRNA [NM_025794]	0.856642	0.127695	1.29837	0.223378	2.97357	3	0	0	0	1.12282	0.573755	0.880051	0.71968	0.877825	0.97242	1.07458	1.2992	1.52134	0.955104	0.997899	1.00532
2191	DATA	4986	31	66	ref|NM_028457|ref|NM_001160043|ens|ENSMUST00000177880|ens|ENSMUST00000030375	mm|chr4:120593936-120593877	0	NA	1860	ACATCAGTGCAGCAAAGGTATCCCTCACTAATCACTGTTGGCTCAAGAAAATTCTTTGGA	4776	0	A_51_P197883	Exo5	NM_028457	ref|Mus musculus exonuclease 5 (Exo5), transcript variant 1, mRNA [NM_028457]	0.875305	0.0702805	1.16674	0.087199	4.5071	3	0	0	0	1.17433	0.898062	0.67325	0.908166	0.923137	0.794614	1.2098	1.22403	1.06638	0.992266	0.970095	1.16587
2196	DATA	4998	31	78	ref|NM_001276448|ref|NM_177840|ens|ENSMUST00000114199|ens|ENSMUST00000059693	mm|chr2:25537069-25537128	0	NA	749	TGATTGGCTGCTCTCCTAGGCTCTTGCTTGGGTTCAAAATAAAATGATTTCACAAGTAAA	4800	0	A_55_P2139014	Lcn6	NM_001276448	ref|Mus musculus lipocalin 6 (Lcn6), transcript variant 1, mRNA [NM_001276448]	0.843464	0.209284	1.2628	0.107902	3.08464	2	0	0	0	1.01873	0.875469	0.65969	0.914285	1.00815	0.607959	1.36455	1.27421	1.14965	1.20752	1.03885	0.880939
2199	DATA	5008	31	88	ref|NM_153516|ens|ENSMUST00000009256|ref|XM_006507133|ref|XM_006507134	mm|chr6:120838382-120838441	0	NA	2454	ATTTGACCTCTTAAAAGTATAGCCAGCCAGCCACCCCACGTGCCTATGATTTAGCAATGA	4818	0	A_55_P2729353	Bcl2l13	NM_153516	ref|Mus musculus BCL2-like 13 (apoptosis facilitator) (Bcl2l13), mRNA [NM_153516]	0.913752	0.0297306	1.18796	0.067617	6.4299	2	0	0	0	0.946912	0.974972	0.877712	0.941046	0.918138	0.882072	1.2268	1.10988	1.2272	0.974813	0.917108	1.00335
2203	DATA	5015	31	95	ref|NM_007458|ref|NM_001077264|ens|ENSMUST00000107857|ens|ENSMUST00000085399	mm|chr7:52155814-52155755	0	NA	3371	TCCTCCCTTTCCCCATCCAGGGGCTGTGTATTATTGTGAGCGAATAAACAGAGAGACGCT	4831	0	A_55_P2116105	Ap2a1	NM_007458	ref|Mus musculus adaptor-related protein complex 2, alpha 1 subunit (Ap2a1), transcript variant 1, mRNA [NM_007458]	1.08722	0.0188514	0.861202	0.10294	3.74066	2	0	0	0	0.999481	0.971711	1.25805	1.09108	1.06673	1.10383	0.900692	0.938549	0.744364	0.973566	1.04354	0.908403
2205	DATA	5019	31	99	ref|NM_013781|ref|NM_001252547|ref|NR_045535|ens|ENSMUST00000113242	mm|chr2:32610434-32610493	0	NA	3011	CATCTTACTGTAAATAAGTCTGGTGTAAATGTATGTACAGAAGCCATGCTCTCTTTCATA	4838	0	A_55_P2098935	Sh2d3c	NM_013781	ref|Mus musculus SH2 domain containing 3C (Sh2d3c), transcript variant 1, mRNA [NM_013781]	1.11026	0.0726693	0.740351	0.151255	3.8181	2	0	0	0	1.04208	1.24567	0.815711	1.08223	1.19277	1.05578	0.694073	0.909338	0.617641	0.938389	1.26386	1.14246
2208	DATA	5024	31	104	ref|NM_146152|ens|ENSMUST00000036156|ens|ENSMUST00000134752|ref|XM_011240493	mm|chr4:117567168-117567109	0	NA	3517	TGAGGGACATGTGTGTCCCGCCTCACCCCTTCTTACCCCTTCCTGTTCCCAAAGAGTAAA	4847	0	A_55_P1973926	Ipo13	NM_146152	ref|Mus musculus importin 13 (Ipo13), mRNA [NM_146152]	1.10387	0.15462	0.911415	0.0533546	2.03793	2	0	0	0	0.881858	0.818983	1.09547	1.05073	0.98282	1.27805	0.853645	0.958839	0.921759	1.06685	1.07834	1.01265
2215	DATA	5044	31	124	ref|NM_001081963|ens|ENSMUST00000037029|ref|XM_006525903|ref|XM_006525904	mm|chr18:4682760-4682819	0	NA	6623	TGGGAAACCTCTAAAGATGCAACCAGTTCCTGGGAGGGACCATCAGGATTATTTCCATAA	4884	0	A_52_P336958	9430020K01Rik	NM_001081963	ref|Mus musculus RIKEN cDNA 9430020K01 gene (9430020K01Rik), mRNA [NM_001081963]	1.12101	0.0608573	0.922477	0.0843249	3.30678	3	0	0	0	0.970241	0.920885	1.12468	1.17085	1.05319	1.13901	0.848284	0.904963	1.01418	0.921522	0.961325	0.970877
2217	DATA	5050	31	130	ref|NM_028705|ens|ENSMUST00000041401|ref|XM_006506695|ref|XM_006506696	mm|chr6:58870174-58870233	0	NA	4512	TATAGATTGTGATGCAGCACCGAGTCTTGATGAAGGAATGTAGATTTTTGCTTTTCCTGT	4894	0	A_51_P249313	Herc3	NM_028705	ref|Mus musculus hect domain and RLD 3 (Herc3), mRNA [NM_028705]	0.715194	0.0528146	1.26117	0.0919525	8.91786	3	0	0	0	1.2772	1.00211	0.806344	0.750838	0.654517	0.740226	1.15557	1.30434	1.32359	1.06157	0.92382	0.99987
2218	DATA	5051	31	131	ref|NM_001271532|ref|NM_133748|ref|NM_178082|ref|NM_001271531	mm|chr1:123203752-123203517	0	NA	590	TGTCACCCAACTGTTAGTCTACAATGGTGTTTATCAATACACATCTCCAGATTTTCTCTA	4895	0	A_55_P2616841	Insig2	NM_001271532	ref|Mus musculus insulin induced gene 2 (Insig2), transcript variant 4, mRNA [NM_001271532]	0.697085	0.053332	1.34182	0.073861	12.2578	3	0	0	0	1.19096	1.04205	0.833978	0.74901	0.699796	0.642449	1.41193	1.26471	1.34883	0.886978	0.890343	1.03897
2223	DATA	5059	31	139	ref|NM_175128|ens|ENSMUST00000054471|gb|AK160693|gb|AK036647	mm|chr10:100035169-100035110	0	NA	2157	TGCATGCTTACAGCATCTACACAGACCAGTGACGAGCAGCCAGACCACTAAATGATTTAA	4911	0	A_51_P454691	4930430F08Rik	NM_175128	ref|Mus musculus RIKEN cDNA 4930430F08 gene (4930430F08Rik), mRNA [NM_175128]	0.901396	0.0894883	1.18138	0.165883	2.57292	3	0	0	0	1.24924	0.979544	0.846346	0.901475	0.811869	0.990845	1.12108	1.05408	1.36898	1.08449	0.702788	0.889265
2231	DATA	5073	31	153	ens|ENSMUST00000089534|tc|TC1611878|nap|NAP092621-001|nap|NAP124019-1	mm|chr9:51431885-51431944	0	NA	2355	AAGGACACTAAGAGCAAGAGAGAGGCCCTCGGTTGCTGAGGAGTCCCTATCCCAACTCAG	4936	0	A_55_P2046374	ENSMUST00000089534	ENSMUST00000089534	ens|predicted gene 7293 [Source:MGI Symbol;Acc:MGI:3779717] [ENSMUST00000089534]	1.21913	0.153015	0.786468	0.00818021	4.89051	2	0	0	0	0.364637	1.1725	1.32375	1.35279	1.25236	1.05223	0.778038	0.786992	0.794373	1.09597	1.03523	0.991122
2232	DATA	5074	31	154	ref|NM_138628|ens|ENSMUST00000037964|ref|XM_011243177|gb|AF422245	mm|chr10:17565277-17565336	0	NA	4264	ATAGTTCCTTGTGTTCAAACTTGGCTGTACTAATCATAACAACTCATAAGATCTGAAAGC	4938	0	A_51_P315391	Txlnb	NM_138628	ref|Mus musculus taxilin beta (Txlnb), mRNA [NM_138628]	0.911437	0.168641	1.23918	0.150374	2.51241	3	0	0	0	0.652444	0.962608	0.97595	0.717649	1.0249	0.991765	1.07455	1.2737	1.3693	0.966452	0.998391	0.992295
2238	DATA	5083	31	163	ref|NM_019472|ens|ENSMUST00000110457|ref|XM_006520025|ref|XM_006520027	mm|chr15:25743019-25743078	0	NA	7690	TCTTTGAAGGGTAACTTGTGTTATCACTCTGGCTAGATTGCAGATATAACCATGTCGAAT	4955	0	A_52_P685422	Myo10	NM_019472	ref|Mus musculus myosin X (Myo10), mRNA [NM_019472]	1.14591	0.0123738	0.866963	0.0556553	8.4742	2	0	0	0	0.642029	1.01987	1.26198	1.14648	1.15799	1.13326	0.873483	0.808336	0.919072	0.994695	1.06151	0.981297
2245	DATA	5093	32	9	ref|NM_010948|ens|ENSMUST00000030665|gb|Y15522|gb|AK146323	mm|chr4:133091488-133091429	0	NA	507	AAAGGATGCAGAGGATCAGGAGGCCCAGCTCAAGAACGGCAGCCTTGACTCACCAGGAAA	4670	0	A_55_P1992811	Nudc	NM_010948	ref|Mus musculus nuclear distribution gene C homolog (Aspergillus) (Nudc), mRNA [NM_010948]	0.799043	0.123038	1.12057	0.190411	2.45655	3	0	0	0	1.11025	1.2967	1.10451	0.881038	0.858524	0.657567	1.07157	0.959456	1.3307	0.905364	0.964291	0.860035
2256	DATA	5122	32	38	gb|AK135628|tc|TC1706762|riken|7330424C03	mm|chr10:120253637-120253578	0	NA	3320	CTGACAGGCAATGTAGAGTGATTTCAATGCAGTTGAGAGAAGTTAGTTTTTCTTCCTTCC	4725	0	A_65_P20736	AK135628	AK135628	gb|Mus musculus adult male adrenal gland cDNA, RIKEN full-length enriched library, clone:7330424C03 product:hypothetical protein, full insert sequence. [AK135628]	1.41759	0.107772	0.685508	0.295119	4.03587	2	0	0	0	1.13639	1.14517	0.844608	1.49638	1.4616	1.29477	0.372205	0.726072	0.958247	0.918904	0.854739	0.790912
2264	DATA	5139	32	55	ref|NM_175654|ref|NM_178210|ref|NM_178193|ens|ENSMUST00000102968	mm|chr13:23673515-23673574	0	NA	44	TGCTAAGCGCCACCGCAAAGTTCTGCGCGACAACATCCAGGGCATCACCAAGCCCGCCAT	4757	0	A_55_P2158701	Hist1h4d	NM_175654	ref|Mus musculus histone cluster 1, H4d (Hist1h4d), mRNA [NM_175654]	0.863963	0.0320168	1.0998	0.163363	2.45377	2	0	0	0	1.01051	1.07972	1.1598	0.849468	0.841757	0.900664	1.15791	0.915327	1.22617	0.993701	0.944844	0.920131
2266	DATA	5142	32	58	ref|NM_001170746|ref|NM_015823|ref|NM_001170745|ens|ENSMUST00000115267	mm|chr5:20208674-20208733	0	NA	4800	CAGCTACGGAAGAACCAAAATCACGCAAACATCACAGAGAGACAGTGCAGTGTAGCTTTA	4763	0	A_51_P386182	Magi2	NM_001170746	ref|Mus musculus membrane associated guanylate kinase, WW and PDZ domain containing 2 (Magi2), transcript variant 1, mRNA [NM_001170746]	0.894757	0.110027	1.23773	0.304993	1.83218	2	0	0	0	0.830397	0.428434	0.976871	1.00567	0.892965	0.785636	1.04826	1.07538	1.58956	1.19009	1.17789	0.99885
2275	DATA	5167	32	83	ref|NM_011877|ref|NM_001146199|ens|ENSMUST00000085116|ens|ENSMUST00000170188	mm|chr12:99915287-99915228	0	NA	5360	GCTTCACAGTGTAGACCTTCTAGAATGTCCGATCTAGGACTAGCTCCCAAATGATACTGT	4810	0	A_51_P450740	Ptpn21	NM_011877	ref|Mus musculus protein tyrosine phosphatase, non-receptor type 21 (Ptpn21), transcript variant 1, mRNA [NM_011877]	0.940628	0.0253852	1.11433	0.210533	1.41879	2	0	0	0	0.956487	0.90133	1.22913	0.935313	0.96825	0.918321	0.979883	1.00615	1.35696	0.929562	0.889044	0.929562
2276	Mean	5170	32	86	ens|ENSMUST00000032597|ens|ENSMUST00000129888|ref|XM_006539679|gb|X74856	mm|chr7:4746095-4746154	0	NA	532	ACCAAGAGCTCCTGAGCCCCACACGCCCGAAGCAATAAAGAGTCCACTGACTTCCATTAG	4815	0	A_66_P104479	Rpl28	ENSMUST00000032597	ens|ribosomal protein L28 [Source:MGI Symbol;Acc:MGI:101839] [ENSMUST00000032597]	1.06796	0.0430627	0.955907	0.0289085	3.74186	3	0	0	0	1.05128	1.05458	1.06561	1.10995	1.07002	1.0239	0.955162	0.927378	0.985181	0.957442	0.894178	0.905325
2283	DATA	5188	32	104	ref|NM_019756|ref|NM_001199045|ref|NM_001199047|ref|NM_001199046	mm|chr11:86380601-86380660	0	NA	1609	CATTGTTGGAGCAAGTTGTTGCCAGTTATGGTAGTCTTGGACCCTAAGCCAAGAGGAAAA	4848	0	A_51_P302056	Tubd1	NM_019756	ref|Mus musculus tubulin, delta 1 (Tubd1), transcript variant 2, mRNA [NM_019756]	1.23558	0.171233	0.783746	0.125235	3.68906	3	0	0	0	0.889886	0.974034	1.19897	1.2323	1.06602	1.40843	0.779026	0.911274	0.660937	0.93929	0.960378	0.979457
2293	DATA	5202	32	118	ref|NM_001039647|ens|ENSMUST00000100960|gb|BC111039|tc|TC1590439	mm|chr5:105752204-105752145	0	NA	2548	CTGGAAACTACTTAAACATCCCTGAGTTAGATTGGCAACAAATTTTTATATGGCTTGATC	4875	0	A_55_P2042813	Gbp11	NM_001039647	ref|Mus musculus guanylate binding protein 11 (Gbp11), mRNA [NM_001039647]	1.03897	0.145866	0.621961	0.274081	2.32632	3	0	0	0	0.982309	0.837278	0.959715	0.954165	0.95534	1.2074	0.614213	0.899835	0.351837	1.14203	1.51496	1.58092
2295	DATA	5206	32	122	ens|ENSMUST00000184371|gb|AK133360|tc|TC1598899|riken|4932442P19	mm|chr2:135838850-135838909	0	NA	3598	GACAAAAGCTGTTTTCTTTGTGTTTCTTTTATGTATAGACACGGTGTTACCTGAAACCAC	4882	0	A_51_P225695	Plcb4	ENSMUST00000184371	ens|phospholipase C, beta 4 [Source:MGI Symbol;Acc:MGI:107464] [ENSMUST00000184371]	1.08708	0.0649105	0.787956	0.128299	3.60333	2	0	0	0	0.918766	1.127	1.2761	1.14912	1.09249	1.01964	0.746958	0.931744	0.685167	1.06536	1.03616	0.951506
2311	DATA	5246	32	162	ref|NR_002841|gb|AK040427|gb|X04231|riken|A430093I18	mm|chr9:94770560-94743703	0	NA	34	TGAAGGAGGCAGAGGCAGGAGGATCACGAGTTCGAGGCCAGCCTGGGCTACACATTTTTT	4954	0	A_55_P2041121	Rn4.5s	NR_002841	ref|Mus musculus 4.5S RNA (Rn4.5s), ribosomal RNA [NR_002841]	1.03452	0.0397219	0.835408	0.0603938	4.7709	3	0	0	0	1.27331	1.02541	1.03978	1.03414	1.07443	0.994986	0.765733	0.867711	0.872782	1.02851	1.09809	0.925123
2312	DATA	5247	32	163	ref|NM_145612|ens|ENSMUST00000086278|ref|XM_011242473|ref|XM_011242472	mm|chr9:22081560-22081501	0	NA	2869	TGAAGAAGTTGCAGCAAATTGATCATGACTTTTTGAGTGCTGTCTGTAAAATCACACCTT	4956	0	A_51_P328883	Zfp810	NM_145612	ref|Mus musculus zinc finger protein 810 (Zfp810), mRNA [NM_145612]	0.81104	0.180779	1.24926	0.197034	2.83848	3	0	0	0	0.844076	0.961423	1.23001	0.649371	0.777512	1.00624	1.46949	1.18859	1.08969	0.975897	0.911786	0.895921
2322	Mean	5269	33	21	ref|NM_001039000|ens|ENSMUST00000099172|gb|AK147707|gb|AK147660	mm|chr10:126662856-126662797	0	NA	6205	AAATGTTGCATGCCGGCGTGGAAGACAAAACCAAACCGCACAAATCCCAGTGTGTATTTA	4995	0	A_51_P107020	Kif5a	NM_001039000	ref|Mus musculus kinesin family member 5A (Kif5a), transcript variant 1, mRNA [NM_001039000]	1.22075	0.145752	0.840075	0.0658945	4.12211	2	0	0	0	0.721067	0.556022	1.11336	1.07058	1.23005	1.36163	0.868485	0.764741	0.886999	0.932251	1.35585	1.13897
2324	DATA	5275	33	27	ref|NM_009926|ens|ENSMUST00000114255|ens|ENSMUST00000114252|ens|ENSMUST00000087497	mm|chr17:34203113-34203172	0	NA	5530	AAAGAAGATAAAGAGAGAAATGCCAAAAATCCCAGCAGATATTGGGGGCAGGTGCTGCAA	5006	0	A_55_P2507485	Col11a2	NM_009926	ref|Mus musculus collagen, type XI, alpha 2 (Col11a2), mRNA [NM_009926]	1.04713	0.125714	0.000350228	3.56448e-11	14.4223	2	0	0	0	0.465219	0.770209	0.879655	1.19034	0.954954	0.996106	0.000350228	0.000350228	0.000350228	4.95339	0.879364	0.909717
2325	Mean	5278	33	30	ref|NM_027015|ref|NM_001190258|ref|NR_033727|ens|ENSMUST00000200305	mm|chr9:114891731-114891672	0	NA	127	TTATGGACGTGAAATGCCCAGGATGCTATAAAGTCACCACGGTCTTTAGCCATGCACAAA	5011	0	A_55_P2163622	Rps27	NM_027015	ref|Mus musculus ribosomal protein S27 (Rps27), transcript variant 1, mRNA [NM_027015]	0.971419	0.056164	1.10618	0.0471483	3.18311	3	0	0	0	1.0608	1.00183	0.856963	0.909437	0.985884	1.01894	1.0758	1.08226	1.1605	0.929553	0.958627	0.959423
2329	DATA	5290	33	42	ref|NM_020619|ens|ENSMUST00000032114|ref|XM_006506424|gb|AK144946	mm|chr6:83068810-83068869	0	NA	2687	TCCTTATTGTCATCCCATATAGCTCTGGGGTGAATGTGAACTCAAAGAGTCTATTTTTCT	5033	0	A_52_P536481	Mogs	NM_020619	ref|Mus musculus mannosyl-oligosaccharide glucosidase (Mogs), mRNA [NM_020619]	1.19025	0.215407	0.846724	0.189067	2.076	3	0	0	0	0.924971	0.915079	1.01464	1.02148	1.11641	1.43287	0.990695	0.916868	0.632609	0.986854	0.99722	1.05031
2336	DATA	5308	33	60	ref|NM_009538|gb|AK142210|gb|AK142052|gb|BC065150	mm|chr10:12850832-12850891	0	NA	4591	ATCTCCTAACCTTTGATGACTCTGTACTTTGTTTTTGAGACTGTATTCCCCAGCATATAT	5066	0	A_55_P1961968	Plagl1	NM_009538	ref|Mus musculus pleiomorphic adenoma gene-like 1 (Plagl1), mRNA [NM_009538]	0.70297	0.305481	1.50535	0.483606	2.42962	3	0	0	0	1.1894	0.939211	1.18754	0.4766	0.581877	1.05043	1.17401	1.28174	2.06029	0.696014	0.63912	0.723761
2338	DATA	5312	33	64	ref|NM_001110497|ref|NM_173734|ref|NM_001110496|ens|ENSMUST00000124806	mm|chr2:120188674-120188615	0	NA	1547	GGAATGAAAATGAGAAGTACCAAGCAGGAACCAAATGGGACTAGTAAAGTAAACAAAGCA	5072	0	A_55_P2216997	Tmem87a	NM_001110497	ref|Mus musculus transmembrane protein 87A (Tmem87a), transcript variant 3, mRNA [NM_001110497]	1.34214	0.281422	0.638802	0.570256	1.91568	2	0	0	0	0.757438	0.428957	0.703528	1.66684	1.19108	1.1685	1.09775	0.818255	0.000404326	1.26504	1.63685	1.26537
2343	DATA	5332	33	84	ref|NM_023603|ens|ENSMUST00000030623|gb|AK018483|gb|BC080848	mm|chr4:126707977-126708036	0	NA	2984	CCCAAGCCCTACAAATGGCTTGTACTGAACTTTTGCATTTGAATTAAAGATTGTTAAACA	5109	0	A_55_P2128451	Sfpq	NM_023603	ref|Mus musculus splicing factor proline/glutamine rich (polypyrimidine tract binding protein associated) (Sfpq), transcript variant 1, mRNA [NM_023603]	0.866035	0.111587	1.22879	0.262695	2.20143	2	0	0	0	0.961846	0.951731	0.882454	0.95374	0.90393	0.740435	1.17688	0.99593	1.51357	1.06417	0.936559	0.918755
2349	DATA	5352	33	104	ref|NM_008231|ens|ENSMUST00000005017|ens|ENSMUST00000161616|ens|ENSMUST00000160198	mm|chr3:87710635-87717070	0	NA	392	GGATTGATGAGATGCCTGAGGCTGCAGTGAAGTCAACAGCCAACAAATACCAAGTCTTTT	5144	0	A_52_P339791	Hdgf	NM_008231	ref|Mus musculus hepatoma-derived growth factor (Hdgf), mRNA [NM_008231]	1.30545	0.190534	0.7825	0.28244	2.65861	3	0	0	0	0.810239	0.935461	1.17731	1.2797	1.12911	1.50756	0.973298	0.916164	0.45804	1.00566	0.991331	0.816137
2350	DATA	5354	33	106	ens|ENSMUST00000156414	mm|chr3:10344777-10344718	0	NA	422	ACAGTGATGTCTGGATGTCTCCTCTCTTCCTCTCGCTAATTGAATACAACTTAACCCTCG	5147	0	A_55_P2620402	Zfand1	ENSMUST00000156414	ens|zinc finger, AN1-type domain 1 [Source:MGI Symbol;Acc:MGI:1913611] [ENSMUST00000156414]	0.8273	0.181627	1.39852	0.208537	3.57766	3	0	0	0	0.774049	0.851125	0.766843	0.745851	0.700655	1.0354	1.54583	1.1599	1.48982	1.06199	0.743971	1.12457
2353	DATA	5361	33	113	ref|NM_027511|ens|ENSMUST00000095109|gb|BC096573|gb|BC080752	mm|chr4:43740921-43740980	0	NA	851	AGACTGTGGTACGGGCATTCACTGCTGCTTGGCTGTAAGAAATAAAAGCCACCAGGAAGC	5160	0	A_55_P2091196	Hrct1	NM_027511	ref|Mus musculus histidine rich carboxyl terminus 1 (Hrct1), mRNA [NM_027511]	0.825791	0.108042	1.12423	0.260241	1.83448	2	0	0	0	0.974083	1.4656	1.43057	0.892656	0.883572	0.701145	0.965701	0.982418	1.42458	0.789081	0.842928	0.647672
2360	DATA	5376	33	128	ref|XM_011240632|gb|BC139808|gb|AK015966|tc|TC1590470	mm|chr4:128760979-128762799	0	NA	1840	AACAATATGGAAATCCAAGTGGACATTGAAGCCAAACCAAGTCACTATCAGTTGGTTTAC	5188	0	A_66_P105038	Rnf19b	XM_011240632	ref|PREDICTED: Mus musculus ring finger protein 19B (Rnf19b), transcript variant X1, mRNA [XM_011240632]	0.650347	0.184786	1.30372	0.262802	3.52259	3	0	0	0	0.922857	1.51931	0.253271	0.472701	0.841528	0.636812	1.34756	1.54185	1.02176	1.43628	1.13351	0.872557
2362	DATA	5381	33	133	ref|NM_023735|ref|NM_001205385|ref|NM_001205386|ens|ENSMUST00000186008	mm|chr1:127290456-127290397	0	NA	1771	ATATTTAATGAGTGTGTCAACATGCAGATGTAGAAGAGAGCTAAGACGATTGTTTTCCTT	5198	0	A_66_P110213	Actr3	NM_023735	ref|Mus musculus ARP3 actin-related protein 3 (Actr3), transcript variant 1, mRNA [NM_023735]	0.835318	0.118072	1.09224	0.0237	3.69517	2	0	0	0	1.24891	0.965325	0.958303	0.912939	0.893576	0.699439	1.10414	1.06495	1.10763	1.06282	0.978091	1.00388
2368	DATA	5390	33	142	ref|NM_024189|ref|NR_028315|ens|ENSMUST00000133736|ens|ENSMUST00000080299	mm|chr15:93115354-93115295	0	NA	1157	CCTCTTAATGCACCTGCTGGTACTTGGTGTGATTAAATAGGAAGTTGTTATTAAATAAAG	5216	0	A_51_P292754	Yaf2	NM_024189	ref|Mus musculus YY1 associated factor 2 (Yaf2), transcript variant 1, mRNA [NM_024189]	0.803617	0.101466	1.17159	0.0163927	6.20092	2	0	0	0	1.50018	1.08396	0.937109	0.816456	0.898053	0.696343	1.19049	1.16291	1.16135	0.88171	0.833761	0.837666
2371	DATA	5396	33	148	ref|NM_001001984|ens|ENSMUST00000075856	mm|chr19:4316229-4316170	0	NA	7182	AAAGAAATAGCCTCCAATGGGAAATATTTTGATTTGGTTTTCTTTTTTGTTTTTGTTTTT	5228	0	A_55_P1971278	Kdm2a	NM_001001984	ref|Mus musculus lysine (K)-specific demethylase 2A (Kdm2a), mRNA [NM_001001984]	1.16977	0.0927476	0.998857	0.0682437	2.57084	3	0	0	0	0.377908	0.901953	1.01448	1.06488	1.20349	1.24094	1.03826	0.920056	1.03826	1.05192	1.25407	0.893789
2373	DATA	5403	33	155	ref|NM_001164838|ref|NM_027742|ens|ENSMUST00000198127|ens|ENSMUST00000197241	mm|chr9:111102268-111102327	0	NA	887	CTCAAGGATGTCATTGAAGAGCAGGAGGAGCAGATGGCAGAGTTTTATAGAGAGAACGAA	5242	0	A_55_P2272007	Lrrfip2	NM_001164838	ref|Mus musculus leucine rich repeat (in FLII) interacting protein 2 (Lrrfip2), transcript variant 1, mRNA [NM_001164838]	1.10968	0.0789583	0.802822	0.0345348	6.16727	2	0	0	0	0.468791	0.910658	1.8735	1.18598	1.02831	1.11475	0.835583	0.766752	0.80613	0.996297	1.07041	0.942832
2375	DATA	5406	33	158	ref|NM_001305981|ref|NM_001305980|ref|NM_007858|ens|ENSMUST00000115629	mm|chr18:38049426-38049367	0	NA	2582	AGGTGAAGGAGGACCGCTTTGAGAACAATGAACTTTTTGCCAAACTTACCCTTGCCTTCT	5248	0	A_55_P2112967	Diap1	NM_001305981	ref|Mus musculus diaphanous homolog 1 (Drosophila) (Diap1), transcript variant 3, mRNA [NM_001305981]	1.19334	0.182095	0.909709	0.100629	2.36125	3	0	0	0	0.484179	0.953796	1.16246	1.0824	1.09412	1.40349	0.87429	0.831579	1.02326	1.04279	1.01322	1.03442
2376	DATA	5410	33	162	ref|NM_011302|ens|ENSMUST00000150170|ens|ENSMUST00000033650|gb|AF084561	mm|chrX:157232740-157232799	0	NA	984	TTAAAAGATAGTTTCAAATTTCAAAGGGAGAGAGAGAGAGAGAGAGAGAGAGAGAGAGAG	5254	0	A_55_P2146185	Rs1	NM_011302	ref|Mus musculus retinoschisis (X-linked, juvenile) 1 (human) (Rs1), mRNA [NM_011302]	1.21595	0.297416	0.558044	0.20298	3.16466	3	0	0	0	0.996986	1.20215	1.59106	1.49321	1.25282	0.901819	0.422483	0.460241	0.791409	1.11234	1.04725	0.728232
2386	DATA	5425	34	13	ens|ENSMUST00000128100|ens|ENSMUST00000030091|gb|BC034004|gb|AK007693	mm|chr4:62183756-62183697	0	NA	1871	GGTGAGAGTGACTGGAGACTGTTGAGAAGATTTTAATGCTTTCTACAAATAAAGAACATT	4983	0	A_52_P80593	Pole3	ENSMUST00000128100	ens|polymerase (DNA directed), epsilon 3 (p17 subunit) [Source:MGI Symbol;Acc:MGI:1933378] [ENSMUST00000128100]	0.842994	0.104491	1.20902	0.147571	3.50616	3	0	0	0	0.94955	0.654366	1.07937	0.808991	0.960252	0.75974	1.21735	1.05747	1.35226	1.03492	1.13456	0.991177
2388	DATA	5430	34	18	ref|NM_010284|ref|NM_001286370|ens|ENSMUST00000069451|ref|XM_006519963	mm|chr15:3268166-3268107	0	NA	3890	ATCTCTTTCATGCAGGAGAGACAGTGAAAATCTAGCCTTGGGTGTTTAAGGTTCGCCTTG	4992	0	A_51_P499854	Ghr	NM_010284	ref|Mus musculus growth hormone receptor (Ghr), transcript variant 1, mRNA [NM_010284]	0.790894	0.118471	1.25476	0.377306	2.03163	2	0	0	0	0.957872	0.707533	1.01332	0.686786	0.919803	0.766093	1.04244	1.03146	1.69039	0.983167	1.07642	1.12471
2401	DATA	5478	34	66	ref|NM_008650|ens|ENSMUST00000169611|gb|AK146309|gb|BC019175	mm|chr17:41095817-41097574	0	NA	2251	AGGATTATGAATTTCTGTATGAAGTTGGTGTTTCCAACGTCTTTGGTCCTGGAACCCGGA	5077	0	A_65_P15689	Mut	NM_008650	ref|Mus musculus methylmalonyl-Coenzyme A mutase (Mut), mRNA [NM_008650]	0.911946	0.0505939	1.27098	0.336209	1.82906	2	0	0	0	0.986862	0.932935	0.823654	0.859817	0.96085	0.915171	1.07695	1.07679	1.6592	0.893917	0.884718	0.929128
2411	DATA	5500	34	88	ref|NM_026033|ens|ENSMUST00000007559|gb|AK012921|gb|AK078416	mm|chr5:3641081-3641022	0	NA	1426	ACTTGAGAAAAATGTTACCTACTACCCAGTAGTTGTATTACCTGCTTAGTGCCTGTTGCT	5118	0	A_66_P119247	Gatad1	NM_026033	ref|Mus musculus GATA zinc finger domain containing 1 (Gatad1), mRNA [NM_026033]	0.884368	0.183235	1.27065	0.23812	2.22678	3	0	0	0	0.866626	1.04409	0.723023	0.920181	1.04705	0.685871	1.20679	1.07096	1.53418	0.96043	0.933422	1.00736
2415	DATA	5514	34	102	gb|AK085384|gb|AK143820|gb|AW539625|riken|F430115D03	mm|chr2:9836211-9836270	0	NA	1928	TCCCCCACCCTTTGTCTCCTCCAAAAAGCACTAATGGGTATACTTGTGCATGTGAAAATA	5142	0	A_66_P128839	Gm13262	AK085384	gb|Mus musculus 0 day neonate kidney cDNA, RIKEN full-length enriched library, clone:D630019C10 product:unclassifiable, full insert sequence. [AK085384]	0.778677	0.200556	1.31638	0.164128	3.59372	3	0	0	0	0.686659	0.83778	0.984424	0.622391	0.70882	1.00482	1.35899	1.13515	1.455	1.04959	1.04014	1.11624
2417	DATA	5517	34	105	ref|NM_181404|ens|ENSMUST00000137260|ens|ENSMUST00000049400|ref|XM_006526590	mm|chr19:25483585-25483644	0	NA	460	ACGGAGTTCTGAATGGAGACCATAACAAGGAAAAGAAAGACCCGTATTTTGTGGAAACCC	5146	0	A_52_P470030	Kank1	NM_181404	ref|Mus musculus KN motif and ankyrin repeat domains 1 (Kank1), mRNA [NM_181404]	1.1286	0.0924557	0.941705	0.084267	2.58768	3	0	0	0	0.886106	0.89264	1.04849	1.03412	1.13279	1.21889	1.0302	0.862417	0.932502	1.12952	1.0779	0.754431
2418	DATA	5521	34	109	ref|NM_027569|ref|NM_001199204|ref|NM_001199203|ens|ENSMUST00000132772	mm|chr11:93897922-93897981	0	NA	612	CTTGAAGAGAGAGAAGCAGAACTGAAGAAGGAATATAATGCACTGCATCAGAGACACACT	5153	0	A_55_P2647378	Spag9	NM_027569	ref|Mus musculus sperm associated antigen 9 (Spag9), transcript variant 1, mRNA [NM_027569]	1.15496	0.155525	0.814791	0.0131421	3.77489	2	0	0	0	0.697945	1.24486	1.03597	1.28379	0.982189	1.19889	0.803012	0.828966	0.812393	1.32022	0.973121	0.818647
2422	DATA	5530	34	118	ref|NM_019549|ens|ENSMUST00000020321|ens|ENSMUST00000102881|gb|AK038804	mm|chr11:16871535-16871476	0	NA	3790	GGAAAGTTCAATCTATATTCCCAAGCCATAGTCACTCATATTTTGCTCTAGAATAAACTC	5171	0	A_55_P1966194	Plek	NM_019549	ref|Mus musculus pleckstrin (Plek), mRNA [NM_019549]	1.55466	0.272062	0.784648	0.201053	3.94246	3	0	0	0	0.640499	0.668621	0.864368	1.26501	1.59414	1.80482	0.997273	0.759054	0.597618	0.924079	0.944785	0.939729
2425	DATA	5537	34	125	ref|XM_011250978|gb|AK086914|gb|AK020640|gb|AK142313	mm|chrX:49404633-49404574	0	NA	3924	GGGCTGTTGTAAACAGAGGCTTAATTTTATTAGAAGTAGCCAGTTATTTATTAAAGCACG	5184	0	A_55_P2733337	Gpc4	XM_011250978	ref|PREDICTED: Mus musculus glypican 4 (Gpc4), transcript variant X1, mRNA [XM_011250978]	0.861336	0.0450413	1.16984	0.119494	4.18437	2	0	0	0	1.13425	0.905825	1.07583	0.811742	0.899699	0.872568	1.22921	1.24803	1.03229	0.853751	0.950023	0.986781
2427	DATA	5540	34	128	ref|NM_028234|ens|ENSMUST00000059644|ref|XM_006535733|ref|XM_006535734	mm|chr5:28742398-28742457	0	NA	6116	GCTGCAACCATTATCTCTGTTCTTTGTGTATCATGCATTTAAAATGAGATGGAAAAGCAT	5189	0	A_55_P1958697	Rbm33	NM_028234	ref|Mus musculus RNA binding motif protein 33 (Rbm33), mRNA [NM_028234]	0.834566	0.0512656	1.14729	0.16168	3.19347	2	0	0	0	1.26476	0.934821	1.02304	0.827405	0.889036	0.787257	0.982434	1.30559	1.15384	0.946172	0.958665	0.926974
2430	DATA	5543	34	131	ens|ENSMUST00000141456|tc|TC1638497|nap|NAP039495-1	mm|chr12:66237673-66237614	0	NA	237	ATAAGTTGTATAACTGTCTCTGCCCTCCAGGAACTTACAAACTAATCTAATCCTAATATG	5195	0	A_52_P634522	Mis18bp1	ENSMUST00000141456	ens|MIS18 binding protein 1 [Source:MGI Symbol;Acc:MGI:2145099] [ENSMUST00000141456]	0.856362	0.0427425	1.20468	0.289089	2.06449	2	0	0	0	0.86298	1.04866	0.9531	0.867595	0.809125	0.892367	1.24088	0.899202	1.47397	0.962765	0.970863	1.01849
2433	DATA	5553	34	141	ref|XM_006502492|ref|XM_006543755|ref|XR_867295|ref|XR_886791	mm|chr3:55195791-55195732	0	NA	3217	AACTCAGCTCCCCCATAGACCTGAATTATTTGTATACAGATAAAAGAAAATGCAATCTGT	5215	0	A_55_P2916630	LOC101056032	XM_006502492	ref|PREDICTED: Mus musculus uncharacterized LOC101056032 (LOC101056032), transcript variant X1, mRNA [XM_006502492]	0.69671	0.133962	1.48333	0.569286	2.32967	2	0	0	0	1.72963	0.843385	0.950184	0.838344	0.572035	0.67975	2.13619	1.22337	1.09044	0.000550034	0.707252	1.22887
2435	DATA	5556	34	144	ens|ENSMUST00000103570|tc|TC1757819|nap|NAP071851-1	mm|chr14:53242491-53242550	0	NA	76	AACAGCTCCCTTCCTCCCTGATTGTCCAGGAGGGAGCCAGTGTTCTGATCAACTGCTCCT	5221	0	A_55_P2027360	ENSMUST00000103570	ENSMUST00000103570	ens|T cell receptor alpha variable 5-1 [Source:MGI Symbol;Acc:MGI:3815062] [ENSMUST00000103570]	1.0086	0.164088	1.30474	0.181169	2.09849	3	0	0	0	0.476936	1.07475	0.97626	1.09213	0.81955	1.11411	1.481	1.11903	1.3142	0.948624	0.75493	0.828488
2438	DATA	5567	34	155	ref|NM_177832|ens|ENSMUST00000183048|ens|ENSMUST00000183324|ens|ENSMUST00000171071	mm|chr18:82766765-82766706	0	NA	5696	ATGAACTGGGTCTGAATATCATTGCGGTGAGATTTGTATTAGCAAAAGACACATCAACAT	5243	0	A_52_P473140	Zfp236	NM_177832	ref|Mus musculus zinc finger protein 236 (Zfp236), mRNA [NM_177832]	1.15747	0.290044	0.393204	0.383189	2.75448	3	0	0	0	0.423742	0.698609	3.35448	1.10714	0.895894	1.46939	0.000301775	0.413432	0.765879	0.553254	1.52723	0.79065
2443	DATA	5576	34	164	tc|TC1714310	mm|chr2:155696062-155696003	0	NA	1687	AAAGGCGAGTCATTCTCCACTACATGTAGAATTTCAGAACAGCCTGTTATGTGAGACCCT	5258	0	A_65_P11264	TC1714310	TC1714310	tc|Q96RT9_HUMAN (Q96RT9) HBV preS1(21-47) binding protein (Fragment), partial (64%) [TC1714310]	1.30108	0.203128	0.601393	0.264156	3.63688	3	0	0	0	0.746301	0.970039	1.51722	1.52975	1.23196	1.14154	0.327548	0.621974	0.854656	1.04866	1.1209	0.889448
2444	DATA	5578	35	2	ref|NM_019442|ens|ENSMUST00000160993|ens|ENSMUST00000162055|ens|ENSMUST00000077477	mm|chr17:34969435-34969083	0	NA	315	TTGGATGCTCATGGGATTGTCTTCACGGAAGACTACAGGACCCGGGTCCTCAAGGCCTGT	5261	0	A_52_P256844	Stk19	NM_019442	ref|Mus musculus serine/threonine kinase 19 (Stk19), mRNA [NM_019442]	0.592703	0.0332321	2.06587	2.42025	1.05417	2	0	0	0	0.82098	0.7065	0.767542	0.557139	0.598002	0.622966	0.683796	0.653328	4.86048	0.528479	0.60292	0.597869
2445	DATA	5580	35	4	gb|AK008011|riken|2010001K21|nap|NAP015639-001	mm|chr13:47106011-47106070	0	NA	753	CCTCTGAGCCGCTGGCGATAACCTGATCGTTATGTGGACACCAGTCTATGTCCAGCACTG	5265	0	A_52_P2745	2010001K21Rik	AK008011	gb|Mus musculus adult male small intestine cDNA, RIKEN full-length enriched library, clone:2010001K21 product:hypothetical protein, full insert sequence. [AK008011]	0.000631144	0	1.42607	1.23501	1.99912	2	0	0	0	2.73785	2.56771	1.42113	0.000631144	0.000631144	0.000631144	0.000631144	2.17534	2.10224	0.000631144	0.000631144	0.991949
2456	DATA	5610	35	34	ref|NM_198111|ens|ENSMUST00000095737|gb|AK129115|gb|AK081151	mm|chr12:54251866-54251925	0	NA	10126	TGTCTTCATCCTACATGTAGAGAGGTGTGTGGACACTTAAGTGATAAGTTTTCTCAAAAA	5320	0	A_51_P224362	Akap6	NM_198111	ref|Mus musculus A kinase (PRKA) anchor protein 6 (Akap6), mRNA [NM_198111]	0.867598	0.114406	1.17549	0.150232	2.82408	3	0	0	0	1.17117	0.739487	0.902196	0.874389	0.978457	0.749948	1.15053	1.33664	1.0393	1.05554	0.948173	1.05417
2462	DATA	5629	35	53	ref|NM_020022|ens|ENSMUST00000023867|gb|AK011353|gb|AK011649	mm|chr5:135074068-135074127	0	NA	1387	TACAGTGAGATACTGAGCTCTGGAAGTGACACACCTCTGCTTTTCTGTGTGAATTCAACC	5356	0	A_55_P2870994	Rfc2	NM_020022	ref|Mus musculus replication factor C (activator 1) 2 (Rfc2), mRNA [NM_020022]	1.20027	0.149727	0.848271	0.18662	2.54819	3	0	0	0	0.871536	0.88576	0.962665	1.14559	1.08557	1.36965	1.02141	0.872815	0.650594	1.06219	1.08618	0.986048
2469	DATA	5642	35	66	ref|NM_011784|ens|ENSMUST00000057019|gb|AK133580|gb|AK075706	mm|chr2:84979638-84979697	0	NA	3121	GGGCCTTTGTGAGCTGGACATGGGTGTGCATATTCCGGGTTTTGTTCTTGGAGGGCTCTG	5381	0	A_52_P97572	Aplnr	NM_011784	ref|Mus musculus apelin receptor (Aplnr), mRNA [NM_011784]	0.762032	0.0456309	0.891956	0.0667751	2.78244	3	0	0	0	0.996941	0.724335	1.76802	0.797428	0.710533	0.778135	0.934515	0.926359	0.814995	1.26751	0.905341	1.37589
2472	DATA	5649	35	73	ref|NM_019490|ens|ENSMUST00000031355|ref|XM_006535140|ref|XM_006535141	mm|chr5:92628923-92630192	0	NA	2715	TTTGCTGCAGGAGACCAAAGAGTTAAAGAATGAGATTAAAGCGCTGTCTGAGGAGAGGAC	5394	0	A_55_P2740594	Uso1	NM_019490	ref|Mus musculus USO1 vesicle docking factor (Uso1), mRNA [NM_019490]	0.922705	0.0760916	1.24681	0.158961	3.18532	2	0	0	0	1.07078	0.547507	1.18559	0.83723	0.94782	0.983064	1.11853	1.19725	1.42465	0.728681	0.95391	1.00499
2474	DATA	5651	35	75	ref|NM_016698|ref|NM_001302448|ref|NM_001302449|ens|ENSMUST00000139853	mm|chr5:115691930-115691871	0	NA	2960	TTTTTAAGTATTTGAGTTTGAACAGATTGATTAGCTTGGGGCGGGGGGAGGGGCTTTCCA	5398	0	A_55_P1970154	Rnf10	NM_016698	ref|Mus musculus ring finger protein 10 (Rnf10), transcript variant 2, mRNA [NM_016698]	0.798652	0.196692	1.08499	0.101072	2.24269	2	0	0	0	1.06128	1.1324	0.952318	0.826715	0.979806	0.589437	1.04353	1.2002	1.01124	1.14806	0.988311	1.06671
2486	DATA	5679	35	103	ref|NM_199222|ref|XM_006511092|gb|AB211986|ens|ENSMUST00000093832	mm|chr9:57456073-57456014	0	NA	1428	GCATCTTCCTGTTCTTCCTCCTACTCCAGACTGTAGGCTTCTTCTGCTACGTGAACTTCA	5453	0	A_55_P1991001	Lman1l	NM_199222	ref|Mus musculus lectin, mannose-binding 1 like (Lman1l), mRNA [NM_199222]	0.849652	0.380165	1.45287	0.208306	2.41019	3	0	0	0	0.781868	0.728059	0.65891	0.607639	0.653488	1.28783	1.68692	1.28783	1.38385	0.966305	0.986836	0.970457
2495	DATA	5698	35	122	ref|NM_017464|ref|NM_001111324|ens|ENSMUST00000021794|ens|ENSMUST00000163623	mm|chr13:41405881-41405822	0	NA	3787	TTCCTTTATGACCAACTCAAGAAATATAGTAGTCTCTGATCTATTTCATTCCAGCCTACT	5486	0	A_52_P491544	Nedd9	NM_017464	ref|Mus musculus neural precursor cell expressed, developmentally down-regulated gene 9 (Nedd9), transcript variant 2, mRNA [NM_017464]	1.38265	0.323678	0.825299	0.222602	2.45743	3	0	0	0	1.05184	0.84868	1.01529	1.08856	1.32994	1.72945	0.92118	0.983892	0.570823	0.770981	0.768463	0.920896
2499	DATA	5712	35	136	ens|ENSMUST00000122360|nap|NAP095398-001|nap|NAP112970-1	mm|chr2:116881472-116881531	0	NA	170	TATGAGGCACTACCACCTGAAGAGGAACCAGAGCTTCTGCCCAACTGTCAACCTGAATAA	5513	0	A_66_P128701	ENSMUST00000122360	ENSMUST00000122360	ens|predicted gene 13981 [Source:MGI Symbol;Acc:MGI:3652167] [ENSMUST00000122360]	0.865183	0.182922	1.09531	0.0725815	2.02538	2	0	0	0	1.21673	1.05697	0.944516	0.968814	0.97276	0.653975	1.12473	1.01263	1.14856	1.0184	0.94815	0.933768
2500	DATA	5713	35	137	ref|NM_019490|ens|ENSMUST00000031355|ref|XM_006535140|ref|XM_006535141	mm|chr5:92631585-92631644	0	NA	3661	CTGTTTAAGCTAAAGATGGAAAACAGATTATAGTCAGCAGTTCATATAGCTGGGATTTAG	5515	0	A_55_P2060722	Uso1	NM_019490	ref|Mus musculus USO1 vesicle docking factor (Uso1), mRNA [NM_019490]	0.773241	0.188179	1.19978	0.0326289	3.86827	2	0	0	0	1.32175	1.0539	0.952034	0.817926	0.935056	0.566741	1.19765	1.16827	1.23343	0.943909	0.926775	0.882558
2505	DATA	5722	35	146	gb|AK160355|riken|E130215H24|nap|NAP017802-001	mm|chr2:150494686-150494745	0	NA	1055	GACCATCAGCTCCGTCATGAAGTTCAAGTTTTTGTTACTGAATAATCAAGAGTAAAAAGA	5532	0	A_55_P2417434	E130215H24Rik	AK160355	gb|Mus musculus 0 day neonate eyeball cDNA, RIKEN full-length enriched library, clone:E130215H24 product:unclassifiable, full insert sequence. [AK160355]	0.697503	0.115296	1.10879	0.0649202	5.38377	3	0	0	0	2.46532	1.11183	0.741223	0.588156	0.817947	0.686406	1.07634	1.06649	1.18354	0.867311	0.720941	0.674495
2507	DATA	5732	35	156	ref|NM_013912|ens|ENSMUST00000039026|gb|AK020057|gb|BC020015	mm|chrX:45378652-45378593	0	NA	2818	GTCCTTTGGCATCTGTTCGAATGTCCTCATTTTTCTGGCAGTGTCACTTAAAGGATTTTT	5551	0	A_51_P209327	Apln	NM_013912	ref|Mus musculus apelin (Apln), mRNA [NM_013912]	1.32046	0.270011	0.826538	0.202148	2.53631	3	0	0	0	0.206211	0.387556	1.20897	1.11879	1.21536	1.62721	0.908157	0.975116	0.596342	1.20392	1.09372	1.45864
2508	DATA	5733	35	157	ref|NM_001085530|ref|NM_001277167|ref|NR_033506|ens|ENSMUST00000178192	mm|chr4:41841838-41841897	0	NA	3385	GACAGACTCTGAGCAGGACATGGAAGACAGTCAAAGCAAGGAATCCATTGTCCCAGAACC	5553	0	A_55_P2033480	Gm13298	NM_001085530	ref|Mus musculus predicted gene 13298 (Gm13298), mRNA [NM_001085530]	1.18978	0.401888	0.606371	0.230436	2.18124	3	0	0	0	0.448517	0.65809	1.24921	1.65161	0.998203	0.919524	0.363525	0.633614	0.821974	1.24949	2.10126	0.90498
2512	DATA	5737	35	161	ref|NM_053100|ens|ENSMUST00000026008|ref|XM_006527488|gb|AK052763	mm|chr19:46590678-46590737	0	NA	2973	TTTTTTAAACCAAGAGTGATTTCTATAGACCCTCTTTCTAGCCGGAAGTTCAAGGCCACA	5561	0	A_51_P103650	Trim8	NM_053100	ref|Mus musculus tripartite motif-containing 8 (Trim8), mRNA [NM_053100]	1.20757	0.0875912	0.941452	0.0754022	3.98819	3	0	0	0	0.437222	0.925811	1.21328	1.19724	1.12561	1.29987	1.02543	0.879551	0.919377	1.08323	1.00812	0.885269
2513	DATA	5742	36	2	ref|NM_001033204|ens|ENSMUST00000113092|ref|XM_006505227|gb|BC144733	mm|chr6:113365450-113365391	0	NA	1131	TGGGCTCCTTGGTCTGACAAACTAAGATCAAATCCCAGAGAGGCCACGTGATTGCTGTGT	5262	0	A_55_P2166421	Rpusd3	NM_001033204	ref|Mus musculus RNA pseudouridylate synthase domain containing 3 (Rpusd3), mRNA [NM_001033204]	1.10362	0.0368565	0.820377	0.278147	1.74853	2	0	0	0	1.07169	0.866147	1.20854	1.10506	1.06607	1.13974	1.02333	0.934476	0.503324	0.996712	1.12006	0.964844
2514	DATA	5744	36	4	ens|ENSMUST00000117448|nap|NAP061206-1|nap|NAP026644-1	mm|chrX:111166966-111166907	0	NA	947	TGTGCTGGGATTGACATTCACCTCTGTGATGTCAGTGAGGTGATTCATGAAGTTATAGGC	5266	0	A_52_P612868	ENSMUST00000117448	ENSMUST00000117448	ens|predicted gene 7416 [Source:MGI Symbol;Acc:MGI:3647901] [ENSMUST00000117448]	0.761677	0.14427	1.30815	0.0965703	5.45211	3	0	0	0	1.15788	0.680423	1.14013	0.708247	0.92504	0.651744	1.39584	1.20465	1.32397	1.09404	0.624005	1.09404
2515	DATA	5745	36	5	ref|NM_010608|ens|ENSMUST00000066295|gb|AK084790|gb|AK032542	mm|chr5:30927090-30927149	0	NA	3256	CTGGGAAATCCTTAGGTGGAAGGAATCTGGCCTGTGTGTATCCCATGTCCGTGTGGAGGA	5268	0	A_52_P639402	Kcnk3	NM_010608	ref|Mus musculus potassium channel, subfamily K, member 3 (Kcnk3), mRNA [NM_010608]	0.862026	0.177847	1.15838	0.0862854	2.59669	2	0	0	0	1.01602	1.1074	0.939631	0.700538	0.832902	1.05264	1.21674	1.19913	1.05926	1.00206	0.950094	0.923587
2520	DATA	5756	36	16	gb|AK036281|gb|BB131490|riken|9630053H18|nap|NAP079252-1	mm|chr4:132191489-132191430	0	NA	2094	TCCCTCCTCCTTGGGGCTGCCAAGACTTACAGCTTGCCTGTCCTGTTGTGTTTCTCTTAA	5288	0	A_66_P111434	AK036281	AK036281	gb|Mus musculus 16 days neonate cerebellum cDNA, RIKEN full-length enriched library, clone:9630053H18 product:unclassifiable, full insert sequence. [AK036281]	0.813953	0.128724	1.2945	0.13202	4.51405	3	0	0	0	0.892436	0.977171	0.878944	0.691374	0.802435	0.948048	1.15701	1.30624	1.42026	0.933898	0.994447	0.997738
2521	DATA	5757	36	17	ens|ENSMUST00000126893|ref|XR_385254|ref|XR_390095|gb|AK035731	mm|chr17:29117389-29117330	0	NA	984	GATAATATTTTGTGTCAGCAGTTCTGTTCTGTAAGGATGCATATAAAGAGCCAGGCATGA	5289	0	A_55_P2085727	Stk38	ENSMUST00000126893	ens|serine/threonine kinase 38 [Source:MGI Symbol;Acc:MGI:2442572] [ENSMUST00000126893]	1.14828	0.40845	0.566098	0.219124	2.17547	3	0	0	0	1.29216	0.508624	1.7309	1.6044	1.02411	0.81632	0.337093	0.773783	0.587419	0.928254	1.15791	1.23902
2530	DATA	5770	36	30	ref|NM_153414|ref|NM_001253731|ens|ENSMUST00000043914|gb|AK150195	mm|chr14:65658359-65658418	0	NA	2363	AGGTGTCTCCAGCTAGGATCTGCCAGTGTGACTTCCTCGTACTGCTGACCCCAAGAACGT	5314	0	A_51_P491051	Ints9	NM_153414	ref|Mus musculus integrator complex subunit 9 (Ints9), transcript variant 1, mRNA [NM_153414]	1.07735	0.0404277	0.862285	0.121455	2.91006	2	0	0	0	0.878233	1.11177	1.04766	1.06301	1.04605	1.123	0.969521	0.88694	0.730395	1.073	1.10838	0.962051
2536	DATA	5783	36	43	ref|NM_026063|ens|ENSMUST00000145148|ens|ENSMUST00000025045|ref|XM_006524821	mm|chr17:27259675-27259616	0	NA	407	TCCCGCCCACGGACCTGACCGTGGGGTCTGATACTCATCAATAAAACTGCCTGGTTTCTC	5339	0	A_55_P2055042	Uqcc2	NM_026063	ref|Mus musculus ubiquinol-cytochrome c reductase complex assembly factor 2 (Uqcc2), mRNA [NM_026063]	1.1111	0.0398893	0.962061	0.100638	2.38456	2	0	0	0	0.805429	0.974975	1.18164	1.07861	1.09906	1.15562	1.00851	0.846588	1.03108	0.990244	0.96215	0.866078
2538	DATA	5789	36	49	ref|NM_001163447|ref|NM_001163449|ref|NM_001163450|ref|NM_001163451	mm|chr17:25034559-25034500	0	NA	5467	GGCCAGTGCAACTTTCCTCAGGCTTTGGCCTTGCAAGTGAACTCACATATCTGCTCTGTA	5349	0	A_55_P2059019	Mapk8ip3	NM_001163447	ref|Mus musculus mitogen-activated protein kinase 8 interacting protein 3 (Mapk8ip3), transcript variant 2, mRNA [NM_001163447]	1.2136	0.130683	0.8212	0.0651035	4.65518	2	0	0	0	0.901127	0.997633	1.28758	1.20833	1.08564	1.34684	0.779196	0.788209	0.896195	0.883186	1.01217	0.813888
2542	DATA	5799	36	59	ref|NM_001304758|gb|AK158380|riken|F930111L12	mm|chr7:125653572-125653513	0	NA	870	GCAGTGAACATAGCCTGCCTGGGCCTCAGTGTTCCCACCTGCAAAGTAGAGATGAAGACA	5368	0	A_66_P137134	Coq7	NM_001304758	ref|Mus musculus demethyl-Q 7 (Coq7), transcript variant 2, mRNA [NM_001304758]	0.822637	0.0422263	1.06764	0.158586	2.58577	2	0	0	0	1.48419	0.918781	1.00137	0.860096	0.776876	0.830938	1.03683	0.926714	1.23937	0.924192	0.948833	1.05181
2543	DATA	5800	36	60	ref|NM_009675|ens|ENSMUST00000103105|ref|XM_011248680|ref|XM_006532041	mm|chr11:101200545-101200604	0	NA	4196	GAAAAGCTAAAAATGAGTAGGCGATAAGTGTACATTTGTTTATTTCTGCTGCATTCCTTG	5370	0	A_51_P378051	Aoc3	NM_009675	ref|Mus musculus amine oxidase, copper containing 3 (Aoc3), mRNA [NM_009675]	1.22147	0.197746	0.812403	0.041382	3.50702	2	0	0	0	1.62099	0.548779	0.884458	1.31787	0.994009	1.35253	0.81947	0.849797	0.767943	0.908751	1.02805	0.907358
2544	DATA	5801	36	61	gb|BC018156|nap|NAP121453-001|nap|NAP096583-001	mm|chr11:78355373-78355314	0	NA	1278	GTGGTTGTTACTTATGTGTCTGATCCAAATAAAGGCAGCTGCTGATTTGTTGTTAAAAAA	5372	0	A_55_P1969396	Tmem97	BC018156	gb|Mus musculus transmembrane protein 97, mRNA (cDNA clone MGC:25841 IMAGE:4192256), complete cds. [BC018156]	0.867646	0.0621267	1.25279	0.123483	4.82586	2	0	0	0	0.996286	0.663411	1.10004	0.796094	0.898966	0.90788	1.23885	1.13686	1.38264	0.987518	0.900427	0.991025
2545	DATA	5804	36	64	ref|NM_001305804|ref|NM_172990|ref|NR_131230|ens|ENSMUST00000070953	mm|chr4:154354923-154354982	0	NA	2591	GGGACACCCAACCCAGCATTTGTCCTGTGGGACACTAGTGTTGGAATGTATTTAACTGTT	5378	0	A_55_P2146002	Pank4	NM_001305804	ref|Mus musculus pantothenate kinase 4 (Pank4), transcript variant 1, mRNA [NM_001305804]	1.11535	0.134847	0.884444	0.0879085	2.48458	3	0	0	0	0.954998	0.934302	1.09066	1.27101	1.04091	1.03413	0.794469	0.888734	0.970129	1.01535	1.08422	0.921084
2553	DATA	5822	36	82	ref|NM_175466|ens|ENSMUST00000050668|ref|XM_011239464|gb|AK032578	mm|chr2:114019309-114019250	0	NA	4150	TGTTAAGATAAACATGTTAAATGATGGTTTGCTGCATGCTAGAACTGTACTTACTGAGTC	5413	0	A_51_P165914	Zfp770	NM_175466	ref|Mus musculus zinc finger protein 770 (Zfp770), mRNA [NM_175466]	0.864563	0.136139	1.32859	0.247527	2.84504	3	0	0	0	1.02085	0.843133	0.685618	0.713396	0.9775	0.902794	1.18415	1.18721	1.6144	0.95372	0.899216	1.01801
2562	DATA	5845	36	105	ref|NM_054085|ens|ENSMUST00000107348|gb|AF338872|gb|AK052268	mm|chr7:88250126-88250185	0	NA	5996	GCCAGGGATTAACTCTAGGTGCCTTATACTCTGTTCTGAAAGGAGTGAGGTTGCAGTAAA	5458	0	A_51_P211305	Alpk3	NM_054085	ref|Mus musculus alpha-kinase 3 (Alpk3), mRNA [NM_054085]	1.16966	0.156285	0.893607	0.0939412	2.62218	3	0	0	0	0.832726	0.840172	1.05882	1.04743	1.11581	1.34575	0.952461	0.943091	0.785268	1.04186	1.00083	1.03578
2566	DATA	5856	36	116	ref|NM_009399|ens|ENSMUST00000027559|gb|AK042798|tc|TC1660593	mm|chr1:107743752-107743811	0	NA	4215	ATCTAGACCTTAACAGTAATCCGGCAGGTATCTAGACCTTAACAGTAAGTTAAACATGCT	5475	0	A_52_P1068320	Tnfrsf11a	NM_009399	ref|Mus musculus tumor necrosis factor receptor superfamily, member 11a, NFKB activator (Tnfrsf11a), mRNA [NM_009399]	1.61325	0.590706	0.376624	0.650996	2.4366	3	0	0	0	0.73078	1.94887	0.645834	1.24463	1.30053	2.29457	0.000771068	1.12833	0.000771068	0.000771068	0.864495	1.83964
2569	DATA	5863	36	123	ref|NM_001004721|ens|ENSMUST00000165234|ens|ENSMUST00000077626|ref|XM_006499333	mm|chr2:155104164-155104105	0	NA	1444	AAGTCCAGGGTCACAAATCTCTGGCACCAAAGGGGACTCATAGCTGGCAACAAGGCCCAT	5489	0	A_52_P222709	Pigu	NM_001004721	ref|Mus musculus phosphatidylinositol glycan anchor biosynthesis, class U (Pigu), mRNA [NM_001004721]	1.03749	0.0207326	1.00091	0.0127959	2.60014	3	0	0	0	1.02225	0.97304	1.03389	1.03114	1.02067	1.06065	0.986673	1.00463	1.01144	0.989831	0.993322	0.872461
2579	DATA	5889	36	149	ref|NM_001033284|ens|ENSMUST00000046743|ens|ENSMUST00000119891|gb|AK151310	mm|chr1:159418805-159418864	0	NA	1229	CCTTCTGTGAGCAAAAGGTACTGTGAGTTCCTTGAGAAATAGGTACTGTACTGGCTAGTT	5539	0	A_55_P2736387	BC026585	NM_001033284	ref|Mus musculus cDNA sequence BC026585 (BC026585), mRNA [NM_001033284]	0.834939	0.116704	1.36679	0.141267	5.02735	3	0	0	0	0.389394	1.09444	0.879431	0.700441	0.909427	0.89495	1.4801	1.41177	1.20852	0.982794	1.02732	1.02142
2580	DATA	5893	36	153	ref|NM_001081069|ens|ENSMUST00000122058|ens|ENSMUST00000152676|ens|ENSMUST00000139639	mm|chr17:26348198-26348257	0	NA	1934	ATAGGGCTGCTCTCTAGTCTCCCTTCACAACCCATTTTCACAGAAATAAAACTTTCAGTC	5546	0	A_55_P2000354	Rgs11	NM_001081069	ref|Mus musculus regulator of G-protein signaling 11 (Rgs11), mRNA [NM_001081069]	0.938458	0.0239578	1.20219	0.0803047	5.45095	2	0	0	0	0.983155	0.653023	1.15466	0.930189	0.91973	0.965455	1.28519	1.12489	1.19649	0.892107	1.03719	0.857914
2584	DATA	5904	36	164	ref|NM_001162943|ens|ENSMUST00000078482|ref|XM_006507655|gb|AK014167	mm|chr7:112901765-112901706	0	NA	10388	GTTGGTCATGACCTGTGGCCAGATCCAGTGTGGAGAGAAATAAGAATGAGGCAACAGCCT	5568	0	A_51_P394558	Dchs1	NM_001162943	ref|Mus musculus dachsous 1 (Drosophila) (Dchs1), mRNA [NM_001162943]	1.32443	0.0644781	0.791175	0.0538204	10.9971	3	0	0	0	0.481081	0.938989	1.44219	1.33616	1.2549	1.38225	0.797248	0.841701	0.734576	0.975426	0.903462	0.912025
2587	DATA	5909	37	5	gb|AK090145|tc|TC1667370|riken|G630005I24|nap|NAP072878-1	mm|chr5:145528663-145528604	0	NA	898	GGCCTTCAGGGCTGGACTTCCTTCCCTGAGATTTTATTTTTCCTCTTCCAGCAATGCTGG	5576	0	A_55_P2055834	AK090145	AK090145	gb|Mus musculus 15 days embryo brain cDNA, RIKEN full-length enriched library, clone:G630005I24 product:unclassifiable, full insert sequence. [AK090145]	0.932445	0.102729	1.27584	0.17373	2.94691	3	0	0	0	0.900303	0.4104	1.0414	0.825819	1.03077	0.940742	1.38932	1.07584	1.36236	1.18899	0.838905	0.995154
2590	DATA	5917	37	13	gb|CB182661|tc|TC1618732|nap|NAP100217-001	mm|chr18:61806830-61806771	0	NA	642	TGATTTCAAGCGTGGAATTGAATGTCTGAGACAAAAGAAAAAGTAGAGGCAGGAACTACT	5591	0	A_52_P20391	CB182661	CB182661	gb|AGENCOURT_11383195 NIH_MGC_164 Mus musculus cDNA clone IMAGE:30243035 5', mRNA sequence [CB182661]	1.24964	0.59002	0.50113	0.162102	2.1188	2	0	0	0	1.15731	0.547822	1.86526	1.831	1.26659	0.651327	0.314484	0.606679	0.582227	1.11295	1.08987	0.974466
2591	DATA	5920	37	16	ref|NM_011224|ens|ENSMUST00000113483|ens|ENSMUST00000035269|gb|AK019077	mm|chr19:6398389-6398448	0	NA	2773	TTTTATGTATGGATGGGGTCTAACCAAGTGCACCCACTCCCCAATAAATCGACTCTTCCT	5596	0	A_55_P1961913	Pygm	NM_011224	ref|Mus musculus muscle glycogen phosphorylase (Pygm), mRNA [NM_011224]	1.07075	0.040445	0.843198	0.156627	2.43645	2	0	0	0	0.967123	0.909683	1.12823	1.05283	1.11706	1.04236	0.920692	0.94597	0.66293	1.0654	1.07332	1.1144
2594	DATA	5924	37	20	gb|AK145572|gb|BY736066|tc|TC1620043|riken|I1C0016O20	mm|chr9:109943858-109943917	0	NA	174	TAACAAGTTTGCATGATCCAGCTACTACCTTGAGAAAGTTAAACAAAACAAAAACACTGG	5604	0	A_65_P20823	AK145572	AK145572	gb|Mus musculus blastocyst blastocyst cDNA, RIKEN full-length enriched library, clone:I1C0016O20 product:unclassifiable, full insert sequence. [AK145572]	1.36038	0.209183	0.560276	0.296091	3.82264	3	0	0	0	1.27341	0.403332	0.962695	1.38968	1.55337	1.13809	0.399324	0.901981	0.379523	0.987497	1.29404	1.31706
2596	DATA	5926	37	22	ens|ENSMUST00000188426	mm|chr1:120147476-120147535	0	NA	1036	ATCTGACTTCTCCTGGAATCCCAATGACTCTGTATCAGAAGACAATATCACCCAAGGTGG	5608	0	A_55_P2722915	ENSMUST00000188426	ENSMUST00000188426	ens|predicted gene 7200 [Source:MGI Symbol;Acc:MGI:3644666] [ENSMUST00000188426]	0.753429	0.116739	1.45723	0.471747	2.50839	2	0	0	0	1.18239	0.690087	0.902671	0.665544	0.885888	0.708855	0.955727	1.52382	1.89214	0.801793	0.890038	0.901047
2610	DATA	5967	37	63	ref|NM_181857|ref|NM_001289803|ref|NM_001289804|ens|ENSMUST00000042954	mm|chr5:34349906-34349847	0	NA	2915	GCTAAACTGATACAGACCACACAAAACCTTTGTGGGACAACTGGGACACCTGAAGTAAAA	5680	0	A_55_P2080531	Poln	NM_181857	ref|Mus musculus DNA polymerase N (Poln), transcript variant 1, mRNA [NM_181857]	1.80428	0.419813	0.457046	0.0969762	5.41578	2	0	0	0	0.400898	0.322066	0.772183	1.50073	1.62875	2.28337	0.557651	0.449327	0.36416	1.10484	1.11196	1.50406
2615	DATA	5974	37	70	gb|AK018474|tc|TC1617764|riken|8430437O03	mm|chr1:174115805-174115864	0	NA	1245	TATTAGTTGTTTCAGTGAGAATGAACTCTAAATGGGGCATAAGAGATAGATAGTTCAACC	5693	0	A_55_P2207593	8430437O03Rik	AK018474	gb|Mus musculus 16 days embryo lung cDNA, RIKEN full-length enriched library, clone:8430437O03 product:unclassifiable, full insert sequence. [AK018474]	1.31862	0.370525	0.67737	0.289436	2.36228	3	0	0	0	1.01925	0.677324	1.03726	1.64081	1.40131	0.913736	0.348064	0.792614	0.891433	1.04927	1.20162	1.02731
2619	DATA	5982	37	78	ref|NM_001039967|ref|NM_181274|ref|NM_001039965|ref|XM_006509721	mm|chr8:72229804-72229745	0	NA	2519	GGAATGTAAGGTGTGTTAAGACCTTGAGATAGCATTGTTTGCCTAGATTCCGAGAATGAA	5708	0	A_51_P130383	Zfp869	NM_001039967	ref|Mus musculus zinc finger protein 869 (Zfp869), transcript variant 1, mRNA [NM_001039967]	0.733573	0.154818	1.01071	0.0988222	2.61352	3	0	0	0	2.49318	0.876757	0.732615	0.728588	0.890822	0.581307	0.986907	1.11926	0.92597	0.80291	0.962124	0.899557
2628	DATA	6006	37	102	ref|NM_201245|ref|NM_012027|ens|ENSMUST00000184613|ens|ENSMUST00000108751	mm|chr11:59541189-59545052	0	NA	733	AAGGAGATCATCAGTGGGTGGTTAGAGATGCTCATGGTGTATCCTCGAACCAACAAGCAG	5755	0	A_66_P114969	Mprip	NM_201245	ref|Mus musculus myosin phosphatase Rho interacting protein (Mprip), transcript variant 1, mRNA [NM_201245]	1.1316	0.0490594	0.73307	0.134642	4.81694	2	0	0	0	0.80505	1.09787	1.5912	1.18807	1.10726	1.09947	0.827283	0.793068	0.578859	0.95722	1.1687	0.785946
2629	DATA	6007	37	103	gb|AK016478|riken|4931428A05|nap|NAP024851-001	mm|chr1:92657002-92657061	0	NA	1788	TCCTGCCCTGACTTCCCCACAATCATGGTCTGTAACCTGGAATTATAAGCAGAAAGAAAC	5756	0	A_55_P2247608	4931428A05Rik	AK016478	gb|Mus musculus adult male testis cDNA, RIKEN full-length enriched library, clone:4931428A05 product:unclassifiable, full insert sequence. [AK016478]	0.874672	0.0817514	1.12816	0.0675715	4.13961	3	0	0	0	0.880726	0.852926	1.01484	0.812634	0.844074	0.967309	1.13737	1.05646	1.19066	1.07292	1.13688	1.03321
2635	DATA	6016	37	112	ens|ENSMUST00000196201|ens|ENSMUST00000101325|ens|ENSMUST00000103356|gb|DQ372800	mm|chr6:69193290-69193231	0	NA	215	ATTCAACTTGGCTTCTGGAGTCCCTGCTCGCTTCAGTGGCAGTGGGTCTGGGACCTCTTA	5774	0	A_52_P578436	ENSMUST00000196201	ENSMUST00000196201	ens|immunoglobulin kappa chain variable 4-71 [Source:MGI Symbol;Acc:MGI:4439654] [ENSMUST00000196201]	0.902186	0.151089	1.1921	0.0920951	2.83783	3	0	0	0	0.853324	0.976746	1.21995	0.804866	0.825449	1.07624	1.12303	1.29666	1.1566	0.777143	0.881502	1.00849
2639	DATA	6021	37	117	ref|NM_009459|ref|NM_001169576|ref|NM_001169577|ens|ENSMUST00000178791	mm|chr6:30165018-30164959	0	NA	927	TCATCGGAGAGTTCTATGTCTGACTTCTCAGAAGATGAGGCCCAGGACATGGAGTTGTAG	5784	0	A_55_P2086075	Ube2h	NM_009459	ref|Mus musculus ubiquitin-conjugating enzyme E2H (Ube2h), transcript variant 1, mRNA [NM_009459]	1.17689	0.105783	0.859429	0.168009	2.76956	3	0	0	0	0.755269	0.940639	1.06447	1.05733	1.21504	1.25831	1.01156	0.887611	0.67911	1.23838	1.0354	0.856882
2645	DATA	6032	37	128	ref|NM_010181|ens|ENSMUST00000025497|gb|AK142484|gb|BC063774	mm|chr18:58168499-58168440	0	NA	10257	GAGTAGTAACCAGTTATAGCCAATGTTTTGGGGTTTTTTGTTTTGTTTTGTTTCGTTTCG	5803	0	A_55_P2121096	Fbn2	NM_010181	ref|Mus musculus fibrillin 2 (Fbn2), mRNA [NM_010181]	0.806229	0.249789	1.47899	0.378765	2.56825	3	0	0	0	0.561336	0.686702	0.569069	0.52478	0.892326	1.00158	1.76239	1.0488	1.62578	1.17715	1.07569	1.0744
2649	DATA	6040	37	136	ref|NM_010765|ens|ENSMUST00000111786|ens|ENSMUST00000111782|ens|ENSMUST00000126524	mm|chr5:121975732-121975673	0	NA	1958	TGGAAGTACAACCGCGAATGCAAGCTCCTGAGGGATGCTCTGCAGAGTTTTAGCTGGAAT	5819	0	A_55_P2163009	Mapkapk5	NM_010765	ref|Mus musculus MAP kinase-activated protein kinase 5 (Mapkapk5), mRNA [NM_010765]	1.05826	0.024719	0.979735	0.0105823	5.05848	2	0	0	0	1.12547	0.859224	0.917776	1.04759	1.08653	1.04068	0.974257	0.991933	0.973014	1.04386	0.93269	1.00699
2654	DATA	6045	37	141	ref|NM_011437|ens|ENSMUST00000040019|ref|XM_006520672|ref|XM_011245532	mm|chr15:78985402-78985343	0	NA	2653	TTGCATTAAGCACTCCAAGTAATATAATCAATGCTTCTGGTTGCCTGCTTGGTGGCCTGA	5829	0	A_55_P2740763	Sox10	NM_011437	ref|Mus musculus SRY (sex determining region Y)-box 10 (Sox10), mRNA [NM_011437]	0.500371	0.433059	1.2258	0.33701	2.28976	3	0	0	0	1.77392	1.26575	0.960401	0.751861	0.748931	0.000319601	0.896214	1.21142	1.56977	0.973984	0.903139	0.944287
2660	DATA	6056	37	152	ref|NM_026142|ens|ENSMUST00000036972|ref|XM_006519450|gb|AK032093	mm|chr14:50301767-50301708	0	NA	2674	GGCTGCAATTTAGAAACTCATAGGATACATGTTCAGTGGGAGATAGGTAGAATAAATATT	5850	0	A_55_P2169829	3632451O06Rik	NM_026142	ref|Mus musculus RIKEN cDNA 3632451O06 gene (3632451O06Rik), mRNA [NM_026142]	0.790104	0.269179	1.30031	0.105877	3.05512	2	0	0	0	0.587946	0.900038	0.902826	0.515549	1.05356	0.8012	1.18216	1.3866	1.33216	1.03995	1.21418	1.08382
2662	DATA	6063	37	159	ref|NM_145941|ref|NM_001304432|ens|ENSMUST00000115460|ens|ENSMUST00000073840	mm|chr16:20692815-20692874	0	NA	5297	TTATTTTCTGAAATCACTCTTGGGACTGCCGTCCTCGCTGCTGGGGGCATATGCCCCAGC	5864	0	A_55_P2046378	Eif4g1	NM_145941	ref|Mus musculus eukaryotic translation initiation factor 4, gamma 1 (Eif4g1), transcript variant 1, mRNA [NM_145941]	1.18226	0.130882	0.940912	0.078563	2.73848	3	0	0	0	0.518329	0.897584	1.05115	1.07413	1.14489	1.32776	0.989726	0.982723	0.850285	1.09501	1.04649	1.02191
2665	DATA	6069	38	1	ref|NM_138741|ens|ENSMUST00000051572|gb|AK132324|gb|AK084096	mm|chr1:51359651-51359710	0	NA	2901	AGTGAGGTGAATAATGGGTGTTGATGGTGTAACCTCTTCAGCTGTGTTCCTGTACTGCAA	5570	0	A_51_P277336	Sdpr	NM_138741	ref|Mus musculus serum deprivation response (Sdpr), mRNA [NM_138741]	1.0984	0.115431	0.938863	0.0204903	2.35696	2	0	0	0	1.00076	0.983478	1.19503	1.22903	1.01014	1.05602	0.932888	0.922025	0.961677	0.843784	0.931824	0.933343
2673	DATA	6096	38	28	ref|NM_173760|ens|ENSMUST00000171129|ens|ENSMUST00000042509|ref|XM_006529499	mm|chr1:99620310-99620251	0	NA	3376	TGAGCCAATTCATATACACAGGAAATCACCGCTTCCGAGGTCCAGGAAGATTACTGCAAA	5619	0	A_52_P130415	Ppip5k2	NM_173760	ref|Mus musculus diphosphoinositol pentakisphosphate kinase 2 (Ppip5k2), mRNA [NM_173760]	1.14049	0.292161	0.733699	0.148963	2.1485	2	0	0	0	0.935412	1.25972	0.942461	1.45581	1.0867	0.87897	0.568957	0.858907	0.773233	0.9782	1.31951	0.942116
2686	DATA	6134	38	66	ref|NM_011270|ens|ENSMUST00000030627|gb|AK079335|gb|AK171641	mm|chr4:134452018-134452077	0	NA	1444	TTGGTTTCATGACAGAGACTATTAATACTTTGGGATGAATACACCTCATTAAAGTTCTGG	5687	0	A_51_P241769	Rhd	NM_011270	ref|Mus musculus Rh blood group, D antigen (Rhd), mRNA [NM_011270]	0.758709	0.279572	1.56424	0.485848	2.48905	3	0	0	0	1.09997	0.542771	0.849215	0.923772	0.916439	0.435915	1.33352	1.23674	2.12246	0.860599	0.977798	0.700798
2689	DATA	6141	38	73	ref|NM_019505|ens|ENSMUST00000152772|ens|ENSMUST00000000285|ens|ENSMUST00000107894	mm|chr11:88912009-88911758	0	NA	1215	GATGCCATTGATGAAATGAAGATTAAGGGACAAGAAAAATACATTCCAGAGGTTGCGGTC	5700	0	A_52_P663096	Dgke	NM_019505	ref|Mus musculus diacylglycerol kinase, epsilon (Dgke), mRNA [NM_019505]	0.583424	0.505557	1.57321	0.567433	2.2558	3	0	0	0	0.998467	0.765078	1.01839	0.89899	0.850966	0.000316639	1.10349	1.41247	2.20367	0.409783	1.28582	1.05256
2690	DATA	6143	38	75	ref|NM_026011|ens|ENSMUST00000032196|gb|AK152798|gb|AK159348	mm|chr6:108773239-108773298	0	NA	2449	ACTTGCTTATGCCTAAAAGGAGGGATTGGAACCAGAATGTTTAACTAAGCGGGGACTGCA	5704	0	A_51_P361426	Arl8b	NM_026011	ref|Mus musculus ADP-ribosylation factor-like 8B (Arl8b), mRNA [NM_026011]	0.935174	0.0988027	1.13363	0.0651963	2.90373	3	0	0	0	1.12895	0.892379	0.906923	0.831785	1.02864	0.945096	1.06488	1.14142	1.19457	0.890446	0.96051	1.01439
2693	DATA	6153	38	85	ens|ENSMUST00000135069|ref|XR_885085|nap|NAP058794-1|nap|NAP028212-1	mm|chr1:168700260-168700319	0	NA	1244	AATTCCAGGGTATGGACAGTGGATTTGCAGGTGGACAAGACGAGATTTACAATATTTATG	5723	0	A_52_P205055	ENSMUST00000135069	ENSMUST00000135069	ens|predicted gene 4954 [Source:MGI Symbol;Acc:MGI:3648917] [ENSMUST00000135069]	0.797431	0.268784	1.2441	0.239691	2.14825	3	0	0	0	1.11121	1.20081	0.707075	0.869343	1.02294	0.500006	1.08241	1.13041	1.51948	0.921877	0.986144	0.948277
2698	DATA	6164	38	96	ref|NM_009297|ens|ENSMUST00000108314|ens|ENSMUST00000002121|ref|XM_006532743	mm|chr11:78022622-78022480	0	NA	4806	GCCAACATCAATCTTGCAGATCTCACACGGGCTGTGAATGCCTTGCCTCAGAACATGACT	5745	0	A_66_P115335	Supt6	NM_009297	ref|Mus musculus suppressor of Ty 6 (Supt6), mRNA [NM_009297]	1.33938	0.3238	0.606747	0.449737	2.28982	3	0	0	0	0.964505	0.900708	1.43576	1.14993	1.15496	1.71326	0.350666	1.12604	0.343532	0.422509	1.27878	1.15935
2701	DATA	6172	38	104	ref|NM_001285511|ref|NM_178854|ref|NM_001285514|ref|NM_144910	mm|chr5:96560199-96560140	0	NA	373	GACAATAACCTTGCTCGCATTCCACCTGATATTGCCAAGCTTCATAATCTGGTTTACCTG	5759	0	A_55_P2641253	Cnot6l	NM_001285511	ref|Mus musculus CCR4-NOT transcription complex, subunit 6-like (Cnot6l), transcript variant 3, mRNA [NM_001285511]	1.12953	0.0622738	0.82569	0.123773	3.79818	2	0	0	0	0.953668	0.948452	1.36553	1.12723	1.06843	1.19292	0.68592	0.921421	0.86973	0.903874	0.930431	1.03239
2702	DATA	6173	38	105	ref|NM_028666|ref|NM_146127|ref|NM_001289151|ref|NM_001289150	mm|chr2:151795195-151795137	0	NA	1837	GGTTAGGAGCCTGGTGCTCTGAAGTCTCTGTGGCTAATAAACACAAATGTTCGTTTTCTT	5761	0	A_55_P2824105	Fam110a	NM_028666	ref|Mus musculus family with sequence similarity 110, member A (Fam110a), transcript variant 1, mRNA [NM_028666]	1.13196	0.113041	0.838455	0.147052	2.74083	3	0	0	0	0.794516	0.943377	1.12042	1.12645	1.02177	1.24765	0.981002	0.847086	0.687278	1.1064	0.98559	1.13845
2707	DATA	6185	38	117	ens|ENSMUST00000182255|gb|BC010792|gb|BC023749|tc|TC1580787	mm|chr12:85002423-85002482	0	NA	1603	GTGCATGATGTATTTTGATGTTAGAGGTAATAAGATATCATTGGTTCTGACTAGACTGAG	5785	0	A_52_P259425	Rbm25	ENSMUST00000182255	ens|RNA binding motif protein 25 [Source:MGI Symbol;Acc:MGI:1914289] [ENSMUST00000182255]	0.998597	0.099794	0.706602	0.137168	2.98152	3	0	0	0	0.820269	1.10523	1.46885	0.917096	1.1099	0.968799	0.619773	0.864736	0.635297	1.0524	1.30533	1.13233
2708	DATA	6186	38	118	ref|NM_021461|ref|NM_001285487|ref|NM_001285488|ens|ENSMUST00000144235	mm|chr4:115551768-115551827	0	NA	2455	GCATATATGACATACAACATTAGTCAACCACAATCACCAAAATTCTCTCATAACTTGTGC	5787	0	A_52_P246082	Mknk1	NM_021461	ref|Mus musculus MAP kinase-interacting serine/threonine kinase 1 (Mknk1), transcript variant 3, mRNA [NM_021461]	1.12243	0.111395	0.764012	0.226774	2.45705	2	0	0	0	1.06364	1.03295	1.12269	1.13345	1.00593	1.2279	0.8382	0.9444	0.509435	0.964827	1.08268	1.0739
2710	DATA	6189	38	121	gb|AK078316|gb|AK021081|tc|TC1600393|riken|C030014I23	mm|chr9:44290197-44290256	0	NA	888	CATTTACCCCTTCCTTGTAAATTCGTGGTGGTAACCATTGAGATAATATAGGCAATGCTT	5792	0	A_55_P2732573	C030014I23Rik	AK078316	gb|Mus musculus adult male olfactory brain cDNA, RIKEN full-length enriched library, clone:6430593K19 product:unclassifiable, full insert sequence. [AK078316]	1.20824	0.211687	0.831076	0.123193	2.6672	3	0	0	0	0.705201	0.730922	0.928294	1.087	1.08504	1.45267	0.782364	0.971176	0.739687	1.35404	1.14225	1.02135
2718	DATA	6205	38	137	ref|NM_026890|ens|ENSMUST00000022815|gb|AK005098|gb|BC023770	mm|chr14:55642880-55642939	0	NA	1105	TGGGATGCTTCTAACTTCACTGTGTGTAGGCGTTTGCCTTGGAAATGTGGAAAGTGCTTT	5822	0	A_51_P131025	Ngdn	NM_026890	ref|Mus musculus neuroguidin, EIF4E binding protein (Ngdn), mRNA [NM_026890]	0.933192	0.0318429	1.06465	0.0591298	3.39034	3	0	0	0	1.2071	1.0143	1.01184	0.945253	0.89708	0.957242	1.0341	1.02704	1.1328	0.955315	0.928767	0.889158
2720	DATA	6207	38	139	ref|NM_001290316|ref|XM_355890|ref|XR_391405|gb|AK008908	mm|chr7:50727326-50727384	0	NA	3384	ATACCAGCAGAAACATAGCCTGGCATATAGCAGGCACTCAATAAATACTCGTGGACTGAT	5826	0	A_66_P105605	Vsig10l	NM_001290316	ref|Mus musculus ZV-set and immunoglobulin domain containing 10 like (Vsig10l), mRNA [NM_001290316]	0.411418	0.407338	1.2134	0.2358	2.9513	3	0	0	0	1.70906	0.973347	1.26293	0.814774	0.419269	0.00021202	1.48087	1.12379	1.03554	1.2942	0.993489	0.892515
2729	DATA	6232	38	164	ref|NM_026014|ens|ENSMUST00000006760|gb|AK192707|gb|AK192601	mm|chr8:125096893-125096952	0	NA	2053	TCTGAGAGTGAAATTGGGCCTTCTGTAAATATGTGAAGTGTGGTTTCTTTTCAAACCTTA	5874	0	A_51_P133612	Cdt1	NM_026014	ref|Mus musculus chromatin licensing and DNA replication factor 1 (Cdt1), mRNA [NM_026014]	1.18317	0.186113	0.946871	0.0463752	2.13387	2	0	0	0	0.588223	0.606851	1.35573	0.982636	1.21653	1.35035	0.982636	0.894473	0.963504	1.11989	0.990168	0.949012
2733	DATA	6248	39	16	ref|NM_009795|ens|ENSMUST00000126116|ens|ENSMUST00000129761|ens|ENSMUST00000001845	mm|chr7:30977522-30977245	0	NA	390	CGACATGGAGGTCAGCGCCACCGAACTCATGAATATCCTCAACAAGGTCGTGACCCGACA	5903	0	A_51_P399538	Capns1	NM_009795	ref|Mus musculus calpain, small subunit 1 (Capns1), mRNA [NM_009795]	0.787059	0.0789342	1.15746	0.14456	3.89513	3	0	0	0	1.14393	0.933206	1.0912	0.70141	0.856879	0.802887	1.16743	1.29678	1.00817	0.872222	0.989917	1.13597
2754	Mean	6296	39	64	ens|ENSMUST00000119124|nap|NAP061257-1	mm|chrX:147141681-147141622	0	NA	477	AGGAAAAGGCCAGAGTCATCACAGAAGAGAAGAACTTTAAGGCTTTGCCAGTCTCCGAAT	5989	0	A_55_P2016838	ENSMUST00000119124	ENSMUST00000119124	ens|predicted gene 15131 [Source:MGI Symbol;Acc:MGI:3642416] [ENSMUST00000119124]	0.94867	0.0265359	1.06846	0.0561393	3.34147	2	0	0	0	0.971049	0.988111	1.01545	0.94926	0.974905	0.921843	1.11096	1.00482	1.08961	1.00723	0.987332	0.979438
2772	DATA	6341	39	109	ref|NM_001077705|ref|NM_013545|ens|ENSMUST00000171549|ens|ENSMUST00000112484	mm|chr6:124671173-124671114	0	NA	1943	CGGTCGGCAGACAAGGAGAAGAACAAAGGTTCTCTCAAGAGGAAGTGATCTGGGCATTCG	6074	0	A_52_P114722	Ptpn6	NM_001077705	ref|Mus musculus protein tyrosine phosphatase, non-receptor type 6 (Ptpn6), transcript variant 2, mRNA [NM_001077705]	1.3439	0.311219	0.846725	0.112425	2.60236	2	0	0	0	0.807683	0.85831	1.14272	0.987047	1.48557	1.55907	0.867966	0.947014	0.725195	0.85788	0.67406	1.08748
2780	DATA	6366	39	134	ref|NM_146389|ens|ENSMUST00000070985|gb|BC104063|gb|BC104062	mm|chr7:6523331-6523390	0	NA	627	GCCCTCACTTGCCTGTCTTATGTTCTTATTGTATACACAGTGGTTCACATCCGTTCTGCA	6119	0	A_51_P276715	Olfr1350	NM_146389	ref|Mus musculus olfactory receptor 1350 (Olfr1350), mRNA [NM_146389]	0.700296	0.465178	1.47182	0.430191	2.10907	3	0	0	0	0.99617	0.494999	0.603295	0.75219	1.13735	0.211346	1.96611	1.182	1.26734	1.33697	0.795779	1.25645
2803	DATA	6421	40	25	ref|NM_015755|ens|ENSMUST00000065856|ref|XM_011246130|ref|XR_384941	mm|chr16:90499686-90499745	0	NA	4896	GAAGAGTCTATTTTAGTCATACGATTTGGTCATGAGTAAGGACTATATTTATGTCACCAC	5921	0	A_55_P1967538	Hunk	NM_015755	ref|Mus musculus hormonally upregulated Neu-associated kinase (Hunk), mRNA [NM_015755]	1.25924	0.14303	1.06226	0.0676087	2.15665	2	0	0	0	0.613664	0.370751	0.552389	1.22678	1.41571	1.13523	1.07213	0.990251	1.12438	1.28295	0.912563	1.30319
2810	DATA	6440	40	44	ref|NM_018794|ens|ENSMUST00000144506|ens|ENSMUST00000019231|gb|AB031290	mm|chrX:71548822-71548881	0	NA	1160	TCTATTCTTTCCACTGTGAGTACGTCAGCAGTGTGAGCAAGAAAGGCAATCTCCTTGTGA	5953	0	A_55_P2110978	Atp6ap1	NM_018794	ref|Mus musculus ATPase, H+ transporting, lysosomal accessory protein 1 (Atp6ap1), mRNA [NM_018794]	0.843988	0.162692	1.39785	0.022355	5.84167	2	0	0	0	1.02715	0.774293	0.645652	0.665659	0.984317	0.881988	1.42177	1.37748	1.39431	0.788204	0.973584	1.0656
2818	DATA	6459	40	63	ref|NM_009199|ens|ENSMUST00000162189|ens|ENSMUST00000025875|gb|U75214	mm|chr19:28987016-28987075	0	NA	2273	CACTGGTAGCTGACAGCCAGTGTTCGGTATAGAACTATATGTATATGTGTGTATATTTAT	5988	0	A_52_P637988	Slc1a1	NM_009199	ref|Mus musculus solute carrier family 1 (neuronal/epithelial high affinity glutamate transporter, system Xag), member 1 (Slc1a1), mRNA [NM_009199]	1.80427	0.229381	0.51686	0.4773	4.21081	2	0	0	0	0.367544	0.411456	1.24699	1.88888	1.54461	1.97934	0.000263472	0.608841	0.941474	1.06662	0.989558	0.954428
2819	DATA	6461	40	65	gb|AK046830|tc|TC1609488|riken|B830018G21|nap|NAP076817-1	mm|chr19:17290889-17290948	0	NA	2086	TATGTGCTTACATGTAGTACTGTATGGCTGGGTTCAAAGGACACTGATGCATCCAGGACT	5991	0	A_55_P2067321	Prune2	AK046830	gb|Mus musculus 10 days neonate medulla oblongata cDNA, RIKEN full-length enriched library, clone:B830018G21 product:unclassifiable, full insert sequence. [AK046830]	1.44077	0.51783	0.489922	0.295089	2.76324	3	0	0	0	0.601535	0.704962	1.1907	2.02357	1.26516	1.03357	0.196044	0.487515	0.786207	1.07945	1.73906	0.892228
2820	DATA	6462	40	66	ref|NM_001252437|ref|NM_029657|ens|ENSMUST00000023159|ens|ENSMUST00000070658	mm|chr16:4938209-4938268	0	NA	3205	CACATGTACTATCATCTGATGTACTCTGATTGGCTAGTTTGGGTTCATTTTTACTGTATA	5993	0	A_55_P2045026	Mgrn1	NM_001252437	ref|Mus musculus mahogunin, ring finger 1 (Mgrn1), transcript variant 1, mRNA [NM_001252437]	0.824468	0.0858398	1.22101	0.440557	1.53024	2	0	0	0	1.12101	0.853852	0.992762	0.837064	0.903313	0.733026	0.919849	1.01654	1.72665	1.01647	0.901908	0.97756
2823	DATA	6466	40	70	ref|NM_001025102|ref|NM_173750|ens|ENSMUST00000028536|ref|XM_006499086	mm|chr2:106802866-106802807	0	NA	3128	GTATGTATTCGGAGACCAAACATACCGTAGAGTTTATAGACAAAAGTATATCTGATCTTG	6001	0	A_52_P570006	Arl14ep	NM_001025102	ref|Mus musculus ADP-ribosylation factor-like 14 effector protein (Arl14ep), transcript variant 1, mRNA [NM_001025102]	0.751846	0.250645	1.05596	0.102066	1.94635	2	0	0	0	1.25494	0.438142	1.36736	0.863967	0.926859	0.464713	1.11684	1.11291	0.938126	1.12654	1.31128	1.07832
2829	DATA	6478	40	82	ref|XM_011247743|ref|XM_006528548|ref|XM_011247744	mm|chrX:136919195-136919254	0	NA	2770	GTGGTATAGCAAATCTCCTGCTGTGTGATATCATCTTAAAAAGCAGCTACGAATAAAAAA	6024	0	A_55_P2725254	Frmpd3	XM_011247743	ref|PREDICTED: Mus musculus FERM and PDZ domain containing 3 (Frmpd3), transcript variant X2, mRNA [XM_011247743]	0.961326	0.0230111	1.12507	0.11987	2.32355	2	0	0	0	1.0493	0.73488	0.625536	0.981882	0.936467	0.965629	1.06847	1.26276	1.04397	1.22818	1.15629	0.946643
2837	DATA	6493	40	97	ens|ENSMUST00000138441|gb|AK051911|tc|TC1613823|riken|D230018D20	mm|chr7:129140173-129140114	0	NA	2117	TTCTTTTGACCTTTTGATCAAGCCAGCTCAGTCAGTCAACAGGTTCTCCAGTGTAGGAGT	6051	0	A_55_P2714632	Gga2	ENSMUST00000138441	ens|golgi associated, gamma adaptin ear containing, ARF binding protein 2 [Source:MGI Symbol;Acc:MGI:1921355] [ENSMUST00000138441]	1.02604	0.152149	0.651159	0.215937	2.45805	3	0	0	0	0.964966	1.33139	1.31347	1.16076	1.05634	0.861018	0.404154	0.745163	0.804161	1.1637	1.18925	1.00564
2844	DATA	6515	40	119	ref|NM_145384|ens|ENSMUST00000172747|ens|ENSMUST00000053862|ens|ENSMUST00000139840	mm|chr4:138854668-138854609	0	NA	1298	TCAGACAGATCTGGAGTTGGCTTGTGCTGCACAGGGGCATACCTCTCAGGTGTATGACAG	6094	0	A_51_P306892	Pqlc2	NM_145384	ref|Mus musculus PQ loop repeat containing 2 (Pqlc2), mRNA [NM_145384]	1.20388	0.149239	0.86896	0.189486	2.40503	3	0	0	0	1.01904	0.729103	1.11506	1.17491	1.07124	1.36547	0.975056	0.981631	0.650194	1.05977	0.902286	0.956234
2847	Mean	6525	40	129	ref|NM_029767|ens|ENSMUST00000108625|ens|ENSMUST00000146927|ens|ENSMUST00000006496	mm|chr7:3658287-3658346	0	NA	490	ATTGTTCGCCTGGACTCTCAGAAGCACATCGACTTCTCCCTCCGTTCTCCTTATGGCGGC	6111	0	A_55_P2047571	Rps9	NM_029767	ref|Mus musculus ribosomal protein S9 (Rps9), mRNA [NM_029767]	0.91714	0.0411062	1.06558	0.0748568	3.01049	3	0	0	0	0.960948	1.09764	1.10199	0.914649	0.877336	0.959435	1.01056	1.03535	1.15082	0.984134	0.912354	0.994788
2849	DATA	6529	40	133	ref|NM_028262|ens|ENSMUST00000071095|ref|XM_006516079|ref|XM_006516082	mm|chr12:109344672-109344641	0	NA	2550	AATCAAAGTAGGACTCGAGTCCTCCTCGTTTTCACGCTGGCTTTGTTTCAGAGGTATACT	6118	0	A_55_P2739708	Setd3	NM_028262	ref|Mus musculus SET domain containing 3 (Setd3), mRNA [NM_028262]	0.907659	0.0174077	1.07669	0.0560419	4.98907	2	0	0	0	1.15841	1.03163	0.918959	0.893722	0.902084	0.927171	1.13989	1.03303	1.05716	1.05776	0.889416	0.990765
2850	DATA	6531	40	135	gb|BC051594	mm|chr19:4000850-4000791	0	NA	879	TACCTGACTTCCCCTTTGTGTCTCCCAACCAGGCGACTAGAACGCAGCGTGTAGAGCAAC	6121	0	A_55_P2728461	Nudt8	BC051594	gb|Mus musculus cDNA clone IMAGE:5256122. [BC051594]	0.902811	0.161009	1.27445	0.126032	3.1481	3	0	0	0	0.983814	0.663843	0.90177	0.753556	0.881438	1.07344	1.41945	1.21265	1.19124	0.943149	0.905694	1.06996
2852	DATA	6538	40	142	ref|NM_146129|ref|XM_011239495|ref|XM_011239494|gb|BC031431	mm|chr2:164714746-164714924	0	NA	1628	CGCAGCTACTTCAGCAAACTGTGGCTCCTCTACCGCTATAGCTGTGTGGATGACTCTGCC	6135	0	A_51_P183165	Pcif1	NM_146129	ref|Mus musculus PDX1 C-terminal inhibiting factor 1 (Pcif1), mRNA [NM_146129]	0.78685	0.173085	1.18518	0.141027	3.09017	3	0	0	0	1.61949	0.958582	0.817274	0.603226	0.810324	0.947	1.29367	1.02576	1.2361	0.97086	0.671332	1.04638
2857	DATA	6551	40	155	ref|NM_008618|ens|ENSMUST00000102874|gb|AK008270|gb|AK002404	mm|chr11:21457339-21457280	0	NA	1313	AGCAAAATATTTTAAATAGTGTGTGCTTTATGATTTGTGAAAGTCTATCATGTTGTTAGT	6160	0	A_52_P407796	Mdh1	NM_008618	ref|Mus musculus malate dehydrogenase 1, NAD (soluble) (Mdh1), mRNA [NM_008618]	0.858939	0.108524	1.1662	0.0156317	4.85385	2	0	0	0	0.66335	0.912907	0.908685	0.765852	0.978136	0.832828	1.18285	1.15184	1.16392	1.0837	1.22493	1.13102
2862	DATA	6561	41	1	ref|NM_173444|ens|ENSMUST00000162291|ref|XM_006496031|ref|XM_006496032	mm|chr1:60387905-60387964	0	NA	8463	CACTCTGAAAGTCTCTAAGGTTTTATCCTGAAGAATGGACTTCCATGCTTTGATATTGGA	6178	0	A_52_P62303	Nbeal1	NM_173444	ref|Mus musculus neurobeachin like 1 (Nbeal1), mRNA [NM_173444]	0.942818	0.0811871	1.15711	0.213737	1.62337	2	0	0	0	1.24234	0.717081	1.16831	0.854082	1.01337	0.961	1.0141	1.05442	1.40281	0.870301	0.847014	0.855169
2864	DATA	6563	41	3	ref|NM_172574|ens|ENSMUST00000140933|ens|ENSMUST00000054536|ref|XM_006515056	mm|chr12:16995781-16995722	0	NA	1600	AAGGGCTATATCTCACAATTACCACTGTTGGAACTTTGTATAAGTTTTAGTTACTGGAAG	6182	0	A_51_P332652	Pqlc3	NM_172574	ref|Mus musculus PQ loop repeat containing (Pqlc3), transcript variant 1, mRNA [NM_172574]	0.952143	0.0770475	1.22971	0.0941695	3.9513	3	0	0	0	1.10677	0.383903	1.21081	0.968029	1.02001	0.86839	1.17846	1.33839	1.17229	0.87444	0.716936	1.16159
2865	DATA	6565	41	5	ref|XM_006519160|ref|XM_006519154|ref|XM_006519155|ref|XM_006519157	mm|chr14:75163331-75163272	0	NA	4462	TTCCTCCCAGCATTGTGTTGATGGTGAATACAGGGTTCGTGATGTGAGTTGTGTCTGAAA	6186	0	A_52_P389957	Lrch1	XM_006519160	ref|PREDICTED: Mus musculus leucine-rich repeats and calponin homology (CH) domain containing 1 (Lrch1), transcript variant X7, mRNA [XM_006519160]	1.00279	0.0539663	0.735041	0.0497472	6.31847	3	0	0	0	1.21914	0.770318	1.73669	0.972827	1.06509	0.970457	0.761737	0.765742	0.677645	1.04752	1.11535	0.897479
2872	DATA	6581	41	21	ref|NM_018748|ens|ENSMUST00000084820|ref|XM_006512189|ref|XM_006512187	mm|chr9:118465743-118465802	0	NA	2981	GGAAATCGAGATCCTCAAACAGACATTGTCTTCTAAAGAAGAGAGCATTAGTATTTTGCA	6215	0	A_52_P467096	Golga4	NM_018748	ref|Mus musculus golgi autoantigen, golgin subfamily a, 4 (Golga4), mRNA [NM_018748]	1.19817	0.096694	1.03333	0.0835379	2.23429	3	0	0	0	1.10928	0.494458	0.634855	1.18332	1.30143	1.10976	1.06448	1.09682	0.938698	1.13731	0.836586	1.09299
2883	DATA	6616	41	56	ref|NM_026764|ref|NM_001160411|ens|ENSMUST00000106670|ens|ENSMUST00000178808	mm|chr3:107846847-107846495	0	NA	326	GTGAGAAGTTCAAATTGGGCCTGGACTTTCCCAATTTGCCTTACTTGATTGATGGGTCAC	6281	0	A_65_P02177	Gstm4	NM_026764	ref|Mus musculus glutathione S-transferase, mu 4 (Gstm4), transcript variant 1, mRNA [NM_026764]	0.858262	0.0845951	1.16325	0.204773	2.38425	2	0	0	0	1.18658	1.14836	0.991808	0.761077	0.915373	0.898337	1.25795	1.30353	0.928266	0.796439	0.761077	1.05121
2887	DATA	6625	41	65	ref|NM_001005916|ens|ENSMUST00000120016|gb|BC049933|tc|TC1581323	mm|chr17:27113088-27113147	0	NA	2723	AGAATGGAGGTGAAGGGAAATTTAAGGTTGTTAATAAACTCTGCCCTGAAATCTAAACTG	6297	0	A_55_P1977289	Zbtb9	NM_001005916	ref|Mus musculus zinc finger and BTB domain containing 9 (Zbtb9), mRNA [NM_001005916]	0.824343	0.0684233	1.11059	0.0772481	4.80456	3	0	0	0	0.997929	0.498391	1.53341	0.854931	0.872136	0.745961	1.19885	1.07765	1.05528	1.22351	1.07287	0.869078
2889	DATA	6627	41	67	ref|NM_019681|ens|ENSMUST00000000199|ref|XR_866008|ref|XR_866007	mm|chr2:31150871-31150930	0	NA	3914	GTAGTTGGCATAAGGGCACAGTGGGAAGCTTTGCCCTCCCAACTTTAATTTTTTAAAAAA	6301	0	A_55_P2494623	Ncs1	NM_019681	ref|Mus musculus neuronal calcium sensor 1 (Ncs1), mRNA [NM_019681]	1.18888	0.155445	0.859083	0.197273	2.27438	3	0	0	0	1.03187	0.746754	1.09201	1.17313	1.3516	1.04191	0.995239	0.949158	0.632851	1.11741	0.962628	0.90544
2891	DATA	6629	41	69	ref|NM_145700|ens|ENSMUST00000188000|ens|ENSMUST00000076147|ref|XM_006511734	mm|chr9:104000923-104000864	0	NA	1653	ATTTGTGTTACACCGAGACCCAACCATCAACAAATACTGTTGTTGCAATTTATAACAAAG	6305	0	A_52_P153291	Ackr4	NM_145700	ref|Mus musculus atypical chemokine receptor 4 (Ackr4), mRNA [NM_145700]	0.940814	0.0936385	1.38837	0.224341	3.18877	2	0	0	0	0.858498	0.421434	0.636627	0.892315	0.881374	1.04875	1.45392	1.57263	1.13855	1.01295	1.2491	0.833845
2894	DATA	6635	41	75	ref|NM_016765|ref|NM_001190449|ens|ENSMUST00000007255|ref|XM_006524612	mm|chr17:35198877-35198936	0	NA	1156	GGTTAGGAATAGAGCTGTATAGTGGGTAGAATCAGCTAATAGAGGCTGGGTAGTCGTGGG	6314	0	A_51_P341177	Ddah2	NM_016765	ref|Mus musculus dimethylarginine dimethylaminohydrolase 2 (Ddah2), transcript variant 2, mRNA [NM_016765]	0.898823	0.034205	0.977591	0.0267886	3.14017	3	0	0	0	1.12059	1.02211	1.61231	0.93757	0.886083	0.872817	0.958255	0.966349	1.00817	0.86922	0.888556	0.857978
2895	DATA	6637	41	77	ref|NM_133215|ens|ENSMUST00000119628|ens|ENSMUST00000103179|ref|XM_006532383	mm|chr11:87428379-87428438	0	NA	4272	GTTTCAGAGGGACAGTTTTGAGGATTAAGACACTTGGAAACAGAAGAACTCTGGTAATGC	6318	0	A_52_P450188	Mtmr4	NM_133215	ref|Mus musculus myotubularin related protein 4 (Mtmr4), mRNA [NM_133215]	0.964046	0.0670268	1.18838	0.17961	2.02682	2	0	0	0	0.974121	0.644887	0.764081	0.892274	0.974847	1.02502	1.13821	1.03919	1.38774	1.22457	1.01058	0.924479
2898	DATA	6651	41	91	gb|AK020725|tc|TC1591439|riken|A330042I05|nap|NAP016354-001	mm|chr18:62914746-62914687	0	NA	507	AAAGGACTGTGCCAGTTTGGGTCTCTGATCCAGGGACCAGGGCTACCAGATCCTGCAGTT	6345	0	A_55_P2143572	2700046A07Rik	AK020725	gb|Mus musculus adult male spinal cord cDNA, RIKEN full-length enriched library, clone:A330042I05 product:hypothetical protein, full insert sequence. [AK020725]	0.645611	0.129466	1.78928	0.595607	3.24994	2	0	0	0	0.899787	0.794153	0.543351	0.571815	0.795101	0.569917	2.38214	1.19097	1.79472	0.631063	0.936579	0.890404
2905	DATA	6673	41	113	ens|ENSMUST00000065878|gb|AK087755|gb|AK159053|gb|AK016408	mm|chr6:66844819-66844760	0	NA	812	TTTATTTTATCTCCCCTCACACATTATTCATTTTTTATTTCTTTTCTGTACTAAAATGTC	6384	0	A_66_P114589	ENSMUST00000065878	ENSMUST00000065878	ens|RIKEN cDNA 4930597O21 gene [Source:MGI Symbol;Acc:MGI:1922623] [ENSMUST00000065878]	0.557034	0.167166	1.09995	0.118483	4.58943	3	0	0	0	0.828025	2.77025	0.968506	0.479332	0.442861	0.748908	0.963199	1.17189	1.16475	0.998995	0.563852	0.899424
2908	DATA	6676	41	116	ref|NM_008369|ens|ENSMUST00000090591|ref|XM_011244733|ref|XM_006517942	mm|chr14:15187898-15187957	0	NA	1287	AGCTCTTGAAGACTGCGAGGTGACGCCTGTGACAGACGCCTGAGAACTGTGTGGGGGCTG	6389	0	A_55_P2008181	Il3ra	NM_008369	ref|Mus musculus interleukin 3 receptor, alpha chain (Il3ra), mRNA [NM_008369]	1.0947	0.101288	0.916487	0.0568598	2.65745	3	0	0	0	0.739563	0.905234	1.42475	1.17937	0.98249	1.12225	0.890199	0.877528	0.981734	1.01133	0.907409	0.978141
2912	DATA	6681	41	121	ref|NM_008139|ens|ENSMUST00000025541|gb|AK147393|gb|AK018078	mm|chr19:16461861-16461920	0	NA	5551	CTTTGTTCTCAGTTTCTCAAAAGAACGAATGAAGTGAAACATAGCAGAATGTTAACCCAT	6399	0	A_55_P2164724	Gnaq	NM_008139	ref|Mus musculus guanine nucleotide binding protein, alpha q polypeptide (Gnaq), mRNA [NM_008139]	1.11725	0.0418882	0.775739	0.398932	1.47466	2	0	0	0	0.955982	1.09434	1.20558	1.09343	1.09271	1.16562	0.99385	1.01806	0.315305	1.09899	1.02453	0.941599
2915	DATA	6685	41	125	ens|ENSMUST00000137083|gb|AK088504|riken|E430019B19	mm|chr11:116218976-116218917	0	NA	1119	CAGTACTTGAGAAGCAGAGACAGTTCGATCCATGAATCTGAGTCCAGCCTAGTCTATAAA	6407	0	A_55_P2714489	Rnf157	ENSMUST00000137083	ens|ring finger protein 157 [Source:MGI Symbol;Acc:MGI:2442484] [ENSMUST00000137083]	0.985814	1.02316	0.00052622	0	1.66794	2	0	0	0	4.58469	1.13532	0.415801	2.04305	0.913868	0.00052622	0.00052622	0.00052622	0.00052622	1.24012	0.838005	0.827042
2919	DATA	6693	41	133	ref|NM_013492|ens|ENSMUST00000022616|ref|XM_006518504|ref|XM_006518503	mm|chr14:66600325-66600382	0	NA	1750	CTCGGGAAGAACTGATTCCCCCACGCAACTAATCCAATAAAAGCCGCCTTGCGATACGTG	6422	0	A_55_P2017929	Clu	NM_013492	ref|Mus musculus clusterin (Clu), mRNA [NM_013492]	1.11852	0.0683593	0.911827	0.0408912	4.49431	3	0	0	0	0.983446	0.85717	0.900644	1.05946	1.10269	1.1934	0.949898	0.868604	0.916978	1.07693	1.00996	1.08082
2920	DATA	6695	41	135	ref|NM_009477|ref|NM_001159401|ref|NM_001159402|ens|ENSMUST00000146696	mm|chr11:9034741-9034800	0	NA	732	TGTTGTCATCACGCAGCAGGCAGTGAATGAGTGCTTCAAGCCGGAGTTTGAGCAGATTGT	6425	0	A_66_P127978	Upp1	NM_009477	ref|Mus musculus uridine phosphorylase 1 (Upp1), transcript variant 1, mRNA [NM_009477]	0.711807	0.0169612	1.51597	0.0981289	13.9867	2	0	0	0	1.61432	1.52118	0.890878	0.713592	0.727804	0.694023	1.59056	1.40481	1.55255	0.448311	0.364161	0.477816
2922	DATA	6699	41	139	ref|NM_025730|ens|ENSMUST00000137657|ens|ENSMUST00000133743|ens|ENSMUST00000172797	mm|chr15:91646398-91646457	0	NA	8072	AGATGTTGCTTGATTATCTATGGACTCAGCGGAGTAGAATAAAATATCTGGTCAATTTCC	6433	0	A_55_P1984406	Lrrk2	NM_025730	ref|Mus musculus leucine-rich repeat kinase 2 (Lrrk2), mRNA [NM_025730]	0.81505	0.169312	1.08341	0.0868207	2.44284	2	0	0	0	1.08455	0.861653	0.904977	0.846546	0.966402	0.632201	1.1749	1.00217	1.07315	1.26184	1.06773	1.12388
2927	DATA	6713	41	153	ref|XM_006523251|ref|XM_006523247|ref|XM_006523249|ref|XM_006523248	mm|chr17:6137920-6137979	0	NA	750	TTAATAGACACAGTTCTAAGATTGCTTTTTCATTAACATAGAAACTAGAGAAAGGAGAAA	6460	0	A_66_P122094	Tulp4	XM_006523251	ref|PREDICTED: Mus musculus tubby like protein 4 (Tulp4), transcript variant X5, mRNA [XM_006523251]	0.863756	0.0344725	1.19886	0.0635819	8.02504	3	0	0	0	0.278127	1.20852	1.00826	0.867869	0.895987	0.827411	1.12572	1.24095	1.22991	0.981985	1.40655	0.928702
2928	DATA	6716	41	156	ref|XM_006502556|ref|XM_006543820|ref|XM_006502554|ref|XM_006543818	mm|chr3:137744343-137744402	0	NA	10238	TGACAAGCCTACCTTTAAGTGCCAGCATTTGTAAGGTGTGATCTTGTGTATTGGTTTTTT	6465	0	A_55_P2414524	LOC102634333	XM_006502556	ref|PREDICTED: Mus musculus uncharacterized LOC102634333 (LOC102634333), transcript variant X2, mRNA [XM_006502556]	1.23552	0.240603	0.994673	0.0442483	1.70524	2	0	0	0	0.470578	0.861219	0.864278	1.09029	1.10303	1.51325	1.04577	0.969296	0.968956	1.04882	1.01382	1.05069
2930	Mean	6720	41	160	ens|ENSMUST00000117369|ens|ENSMUST00000118594|ens|ENSMUST00000177615|ens|ENSMUST00000177760	mm|chr11:60464694-60464635	0	NA	262	AGAAGGACAAGTAACAAGATGATCTGCTGCAAGTGCTACACATGCCTGCACCCTCGTGCA	6472	0	A_55_P2064150	ENSMUST00000117369	ENSMUST00000117369	ens|predicted gene 12619 [Source:MGI Symbol;Acc:MGI:3649878] [ENSMUST00000117369]	1.05852	0.00907041	0.973486	0.077167	1.89563	2	0	0	0	0.97437	1.04719	1.0692	1.05307	1.06899	1.05351	1.01821	1.01787	0.884382	0.96542	0.925383	0.922412
2931	Mean	6723	41	163	ens|ENSMUST00000119908|ens|ENSMUST00000118766|ens|ENSMUST00000189720|ens|ENSMUST00000171235	mm|chr13:009595976-009595917	0	NA	289	AGAACAAGAAGGCTCAGCTGGTGGTAACTGCCCATGACATAGACGCCATTGAGCTGGTGG	6476	0	A_55_P2003720	ENSMUST00000119908	ENSMUST00000119908	ens|predicted gene 9005 [Source:MGI Symbol;Acc:MGI:3644003] [ENSMUST00000119908]	0.924027	0.0394987	1.11186	0.0472015	5.28594	3	0	0	0	1.01064	1.08682	0.887595	0.902779	0.8997	0.969601	1.07189	1.09976	1.16394	0.938319	0.9688	1.00016
2942	DATA	6752	42	28	ref|NM_030153|ens|ENSMUST00000172118|ens|ENSMUST00000022038|ref|XM_006517459	mm|chr13:59735941-59736000	0	NA	2412	GGAAGACTTTTCAGTTTACCACCCTTACCTAGAGAGGATGAGAACTGCTGTTTTAAAGTG	6230	0	A_52_P443167	Naa35	NM_030153	ref|Mus musculus N(alpha)-acetyltransferase 35, NatC auxiliary subunit (Naa35), mRNA [NM_030153]	0.922364	0.0868195	1.13813	0.0882356	3.01905	3	0	0	0	1.1508	1.11735	0.688569	0.831931	0.930111	1.00505	1.10019	1.23899	1.07521	0.940103	0.949443	0.972251
2959	DATA	6791	42	67	ref|NM_133878|ens|ENSMUST00000155129|ens|ENSMUST00000105951|ens|ENSMUST00000084250	mm|chr4:131895849-131894104	0	NA	177	AAGGTGAAAGTCTCACACAGGTCCCACAACACAGAACCAGGCTTGGTGCTGACACTGGGC	6302	0	A_55_P2926626	Rcc1	NM_133878	ref|Mus musculus regulator of chromosome condensation 1 (Rcc1), transcript variant 2, mRNA [NM_133878]	0.688863	1.18999	0.00182159	0	1	2	0	0	0	4.11906	1.86728	3.93614	0.00182159	2.06295	0.00182159	0.00182159	0.00182159	0.00182159	0.00182159	0.00182159	0.00182159
2966	DATA	6809	42	85	ref|NM_013727|ref|NM_001286508|ens|ENSMUST00000133814|ens|ENSMUST00000133580	mm|chr9:117968247-117970844	0	NA	1200	AGCAGAACTACTAAGAAAACTGAAAACCTCAGCTGCAGTCAAGAAAGCCTGTACCCCAGT	6335	0	A_55_P2623496	Azi2	NM_013727	ref|Mus musculus 5-azacytidine induced gene 2 (Azi2), transcript variant 1, mRNA [NM_013727]	0.624523	0.109905	1.58767	1.26672	1.31203	2	0	0	0	1.34096	0.826491	0.779259	0.74725	0.591136	0.535183	3.04566	0.960123	0.75723	0.743015	0.855879	0.817821
2969	DATA	6817	42	93	ref|NM_013854|ens|ENSMUST00000043757|ref|XM_006524122|gb|AK145549	mm|chr17:36093974-36093915	0	NA	2939	TGGTCCCTCCTTTTGGAAGGGTACTACTGACTCACTGACACAAACAGCCAGAACCTCAGG	6350	0	A_51_P107234	Abcf1	NM_013854	ref|Mus musculus ATP-binding cassette, sub-family F (GCN20), member 1 (Abcf1), mRNA [NM_013854]	1.07453	0.0600024	0.880705	0.202937	1.58637	2	0	0	0	1.00103	1.08213	1.22831	1.05253	1.14242	1.02863	0.996248	0.999486	0.646382	0.946135	0.905273	0.971423
2972	DATA	6824	42	100	ref|NM_001029983|ens|ENSMUST00000042390|ref|XM_006497860|ref|XM_011239058	mm|chr2:25207673-25207732	0	NA	3681	AAGCAGGAAACCTGAGAGCTAGAGTCCCTGCTTAATTAAATGTCTAAATGGTCTCAGCAA	6361	0	A_55_P2020796	Man1b1	NM_001029983	ref|Mus musculus mannosidase, alpha, class 1B, member 1 (Man1b1), mRNA [NM_001029983]	1.22318	0.151581	0.696668	0.266605	2.97358	3	0	0	0	0.923706	1.01382	1.08069	1.11013	1.16399	1.39543	0.896696	0.799312	0.393998	1.09952	1.14342	0.979295
2977	DATA	6837	42	113	ref|NM_134101|ref|NR_027485|ens|ENSMUST00000167869|ens|ENSMUST00000166071	mm|chr16:20659542-20659601	0	NA	1667	ACTTCCACCATCCTTCAGACCATCATGGAGAAATCTGAGACTGAGCTCAAGGATACCTAT	6385	0	A_55_P2848371	Psmd2	NM_134101	ref|Mus musculus proteasome (prosome, macropain) 26S subunit, non-ATPase, 2 (Psmd2), transcript variant 1, mRNA [NM_134101]	1.03237	0.0450379	0.909805	0.0364226	3.66494	3	0	0	0	0.800901	1.27219	1.24958	1.07855	0.988566	1.02998	0.946143	0.909972	0.873299	0.982203	0.957642	0.910977
2979	DATA	6845	42	121	ref|NM_027017|ens|ENSMUST00000124945|ens|ENSMUST00000051153|gb|AK014369	mm|chr2:150136732-150136673	0	NA	588	GAAGACTAGGTGGGTAAGGATTTGGTGGTGACAAACAGAAATAAACACAGAGGCAATTTG	6400	0	A_55_P2006479	3300002I08Rik	NM_027017	ref|Mus musculus RIKEN cDNA 3300002I08 gene (3300002I08Rik), mRNA [NM_027017]	1.07702	0.223408	0.594464	0.142861	3.15189	3	0	0	0	1.0985	1.17222	1.7596	1.21944	1.19209	0.819539	0.432154	0.701133	0.650106	0.949645	1.07355	0.932025
2980	DATA	6849	42	125	ref|NM_030258|ref|NM_001038703|ens|ENSMUST00000100514|ens|ENSMUST00000051293	mm|chr5:139872290-139872349	0	NA	3991	CAAAATTCTGTGAATGTGAAAAAGAAACTACTGATGGGATCCACACTTCTGAAGACTATT	6408	0	A_55_P2027392	Gpr146	NM_030258	ref|Mus musculus G protein-coupled receptor 146 (Gpr146), transcript variant 1, mRNA [NM_030258]	0.928919	0.0814847	1.14386	0.0810276	3.23969	3	0	0	0	1.03854	0.997627	1.05876	0.837609	0.994237	0.95491	1.06543	1.13889	1.22726	0.933552	0.863374	0.889818
2982	DATA	6851	42	127	ref|NM_013818|ens|ENSMUST00000046463|ref|XM_006520450|gb|AK158342	mm|chr15:79551399-79551458	0	NA	2887	GCCTCAGAGTTCCGGGCTACTAGACTGGGTCTTCCTGGTTTTGTAGTACCTCCTTTGGTG	6412	0	A_52_P375638	Gtpbp1	NM_013818	ref|Mus musculus GTP binding protein 1 (Gtpbp1), mRNA [NM_013818]	0.873742	0.154358	1.17585	0.086799	2.95485	3	0	0	0	1.1362	1.00573	0.872017	0.740153	0.838351	1.04272	1.21268	1.23817	1.07671	1.00023	0.831803	1.00523
2984	Mean	6854	42	130	ref|NM_001163485|ref|NM_009083|ref|NR_028101|ens|ENSMUST00000119573	mm|chr15:34372462-34372403	0	NA	220	AACAGACTCTGAAGATGATCGGACAAGGCAAAGCGAAGTTGGTTATCCTTGCCAACAACT	6417	0	A_55_P2104941	Rpl30	NM_001163485	ref|Mus musculus ribosomal protein L30 (Rpl30), transcript variant 2, mRNA [NM_001163485]	0.953552	0.0139545	1.05163	0.0444761	3.64429	2	0	0	0	1.04943	1.13692	0.931275	0.963308	0.959779	0.937568	1.05789	1.09264	1.00435	0.967422	0.988402	0.911009
2988	DATA	6862	42	138	ref|NM_175532|ens|ENSMUST00000055745|gb|AK028802|gb|BB141516	mm|chr7:116065511-116065452	0	NA	4338	GCAGGCTCAGATGACCAGACATACCTCTCAACTACCCTTTATTGTTTTGTTTTGTTTTTT	6432	0	A_55_P2804497	Nlrp10	NM_175532	ref|Mus musculus NLR family, pyrin domain containing 10 (Nlrp10), mRNA [NM_175532]	0.844354	0.15941	1.21434	0.104274	3.3642	3	0	0	0	1.24375	0.971038	0.814204	0.729388	0.777342	1.02633	1.32191	1.11371	1.2074	0.928544	0.904567	0.961823
2991	DATA	6870	42	146	ref|NM_145131|ens|ENSMUST00000021611|ref|XM_006516508|gb|AK147837	mm|chr13:6579199-6579258	0	NA	3337	CATTAAATGACAGCAGTGAGCAAATTAAGCCTCTGAAACATTACTAAGCCTAGAATATGT	6447	0	A_55_P1979551	Pitrm1	NM_145131	ref|Mus musculus pitrilysin metallepetidase 1 (Pitrm1), mRNA [NM_145131]	0.810239	0.0954917	1.11093	0.0834235	4.10734	3	0	0	0	1.42284	1.00976	0.846694	0.771876	0.918946	0.739895	1.02851	1.10895	1.19532	0.953987	0.971754	1.03147
2993	DATA	6872	42	148	gb|AK132885|riken|4930484A08	mm|chr8:107814117-107814176	0	NA	229	TCCCCTTCCTCGCACCTCACGTCGGGAAATTGCTGCCTCAAGCCTGCCACCTCGAGGCCA	6451	0	A_66_P131291	LOC102636360	AK132885	gb|Mus musculus adult male testis cDNA, RIKEN full-length enriched library, clone:4930484A08 product:unclassifiable, full insert sequence. [AK132885]	0.76983	0.0533369	1.1678	0.118013	5.32252	2	0	0	0	1.08294	1.36161	0.770165	0.720349	0.762814	0.826328	1.29732	1.06637	1.1397	1.08217	0.972718	0.917513
3000	DATA	6886	42	162	ref|NM_178655|ref|NM_001034168|ens|ENSMUST00000182588|ens|ENSMUST00000044443	mm|chr3:126625426-126625367	0	NA	4868	TGCATTTGTGTGACTTTCTGTTTGTTTTAGAGAAGGGACAATGACAGTCTGAGTGCTCCC	6475	0	A_52_P137678	Ank2	NM_178655	ref|Mus musculus ankyrin 2, brain (Ank2), transcript variant 2, mRNA [NM_178655]	1.10044	0.0244309	0.939885	0.0443442	5.49263	3	0	0	0	0.558462	0.896961	1.22358	1.08271	1.0903	1.12831	0.991088	0.913997	0.91457	1.17641	1.0525	0.971118
3003	DATA	6892	43	4	ref|NM_001039521|ens|ENSMUST00000023363|gb|AK080397|gb|AK170340	mm|chr16:13814761-13814820	0	NA	3424	TGGAAAGTAGCTAGAATGTAGAAGGTATGTTGACAAATAAGCCTCTTAGGTTACAAAGGA	6485	0	A_51_P314679	Rrn3	NM_001039521	ref|Mus musculus RRN3 RNA polymerase I transcription factor homolog (yeast) (Rrn3), mRNA [NM_001039521]	0.868405	0.127947	1.17619	0.188414	2.34072	3	0	0	0	1.01145	0.540162	1.34325	0.872173	0.994426	0.738615	1.12896	1.01588	1.38373	1.08758	0.863869	1.0199
3012	DATA	6918	43	30	ref|NM_152922|ens|ENSMUST00000097345|ens|ENSMUST00000015611|ens|ENSMUST00000170850	mm|chr17:34750364-34750305	0	NA	1084	GTCTCTCTTTCTCTTTATTTTCAGTTGCTTGCTGTTATCCAGATAATAAAAACCAACCAC	6530	0	A_55_P2115507	Egfl8	NM_152922	ref|Mus musculus EGF-like domain 8 (Egfl8), mRNA [NM_152922]	0.880669	0.0426303	1.24629	0.318916	1.96819	2	0	0	0	0.815971	0.711823	0.891142	0.836485	0.921554	0.883969	1.01308	1.11608	1.60971	1.08308	1.01652	1.10059
3014	DATA	6924	43	36	ens|ENSMUST00000148999|gb|AK165422|gb|AK165425|tc|TC1642381	mm|chr13:6601859-6601800	0	NA	1513	GGACTATACCAAATACTGATTTGAGTGTTAAGGGTTACCTTCCACTTAGGAACCCTGCCC	6542	0	A_65_P04184	Pfkp	ENSMUST00000148999	ens|phosphofructokinase, platelet [Source:MGI Symbol;Acc:MGI:1891833] [ENSMUST00000148999]	1.68288	0.113157	0.249868	0.43235	5.55375	2	0	0	0	0.920537	1.14158	1.04924	1.55281	1.73707	1.75874	0.000250118	0.749102	0.000250118	0.932731	1.27393	0.883749
3015	DATA	6926	43	38	ref|NM_026509|ens|ENSMUST00000030033|gb|AK009691|gb|BC089601	mm|chr4:48686163-48686222	0	NA	1842	TTGGAGAACTTGAGATCTGAGGTGGTGTCACAGAGTTTGTGAGAACAAGACACACGACAA	6546	0	A_55_P1954331	Murc	NM_026509	ref|Mus musculus muscle-related coiled-coil protein (Murc), mRNA [NM_026509]	0.843442	0.121237	1.28919	0.106402	4.78629	3	0	0	0	1.17734	1.02468	0.828115	0.847999	0.962337	0.719992	1.23285	1.22281	1.41192	0.85556	0.844789	0.871613
3021	DATA	6942	43	54	ref|NM_010916|ens|ENSMUST00000059794|gb|AK149315|gb|M82874	mm|chr1:173982518-173982459	0	NA	2391	TGGGATCTGTGTCTGGTGTCCTGTGTGTCTTTGTCTGGTTGCATTCCTAATTTCCTACAA	6577	0	A_66_P115793	Nhlh1	NM_010916	ref|Mus musculus nescient helix loop helix 1 (Nhlh1), mRNA [NM_010916]	0.756086	0.0435585	1.34092	0.730869	1.38352	2	0	0	0	0.815308	0.69105	1.16011	0.709216	0.795325	0.763716	0.95301	0.885794	2.18397	0.953373	1.04856	1.04057
3023	DATA	6945	43	57	ref|NM_024215|ens|ENSMUST00000129183|ens|ENSMUST00000030644|gb|AK133585	mm|chr4:133799297-133799238	0	NA	1899	TGTGGGCTTGAGGGTGACAAAGGTTTGCTTGTGCCATTAAGCTGTCTATAATGTTATGTT	6582	0	A_55_P2150058	Zfp593	NM_024215	ref|Mus musculus zinc finger protein 593 (Zfp593), mRNA [NM_024215]	0.852523	0.111565	1.21131	0.239936	2.34853	2	0	0	0	0.774626	0.716253	1.35717	0.844043	0.968085	0.74544	0.987806	1.18127	1.46485	1.06294	0.933969	0.96355
3024	DATA	6946	43	58	ref|NM_010212|ref|NM_001289533|ens|ENSMUST00000008280|ref|XM_011238434	mm|chr1:43180053-43179994	0	NA	1428	TGTGTTATGAACTTGAATGTATTTTCACGGGAGAGCTGGGATTTGCAGCTTTGTGACTTC	6584	0	A_51_P140237	Fhl2	NM_010212	ref|Mus musculus four and a half LIM domains 2 (Fhl2), transcript variant 1, mRNA [NM_010212]	0.891217	0.078193	1.10024	0.0316637	4.29159	2	0	0	0	0.878127	0.806874	1.205	0.925423	0.946478	0.801749	1.09152	1.07386	1.13535	1.01285	1.08096	1.04181
3026	DATA	6952	43	64	ref|NM_009199|ens|ENSMUST00000025875|gb|AK083097|gb|AK018188	mm|chr19:28988332-28988391	0	NA	3589	GTTCACAAGATCATTGGGGTCATCTTGTAACCAGCCACTTCACACACTGTGCTGTTAACT	6595	0	A_51_P110759	Slc1a1	NM_009199	ref|Mus musculus solute carrier family 1 (neuronal/epithelial high affinity glutamate transporter, system Xag), member 1 (Slc1a1), mRNA [NM_009199]	1.46936	0.53494	0.462095	0.400481	2.61078	3	0	0	0	0.646848	0.766613	1.21786	2.01258	1.45238	0.943108	0.713084	0.672962	0.000240129	1.19434	1.19674	1.18324
3028	DATA	6963	43	75	ref|NM_028016|ref|NM_001289828|ref|NM_001289830|ref|NM_001289831	mm|chr6:122663676-122663735	0	NA	1238	TAAGTACACTGTAGCTGTCTTCAGACACTCCAGAAGAGGGCGTCAGATCTTGTTACGTAT	6613	0	A_55_P2007699	Nanog	NM_028016	ref|Mus musculus Nanog homeobox (Nanog), transcript variant 1, mRNA [NM_028016]	0.811933	0.338448	1.20763	0.177042	1.79437	3	0	0	0	1.15811	0.889775	0.634422	1.00051	1.01408	0.421206	1.37014	1.23379	1.01897	1.13089	1.11976	1.00835
3043	DATA	7016	43	128	ref|NM_173024|ens|ENSMUST00000085052|ref|XM_006515931|gb|AK037160	mm|chr12:105377694-105377753	0	NA	2008	ACCTCCACCTCCATCACCCAAAATGAAAGGGAGGAGCAAATGATCAATAAACGTATCCCT	6708	0	A_55_P2161450	Serpina3b	NM_173024	ref|Mus musculus serine (or cysteine) peptidase inhibitor, clade A, member 3B (Serpina3b), mRNA [NM_173024]	0.893945	0.112218	1.37382	0.417533	1.92243	2	0	0	0	1.02551	0.927089	0.900506	0.942266	0.76566	0.973908	1.83854	1.25261	1.03029	0.811283	0.891584	0.640748
3047	DATA	7029	43	141	gb|AK133922|riken|5730526N03	mm|chr9:110086584-110086643	0	NA	1713	AGCAAGTCCATGAGCCTTCTCCCCACAATTCCCTCTGGTTGTTTTTGCTTTTTGTTTCTT	6732	0	A_55_P1984625	Smarcc1	AK133922	gb|Mus musculus 8 days embryo whole body cDNA, RIKEN full-length enriched library, clone:5730526N03 product:SWI/SNF related, matrix associated, actin dependent regulator of chromatin, subfamily c, member 1, full insert sequence. [AK133922]	0.717549	0.0737812	1.31906	0.0588047	11.0426	3	0	0	0	1.32364	0.906508	0.722705	0.72106	0.789513	0.642076	1.37334	1.32726	1.25659	0.834682	0.999314	1.10331
3055	DATA	7052	43	164	ref|NM_020004|ref|NM_001038010|ens|ENSMUST00000126299|ens|ENSMUST00000103118	mm|chr11:100566128-100566069	0	NA	2979	GGCAGGAGGACCATTCATTCCTTGGCATTAATCCCTCGGAGGGAACAATAAAGCTTTTTT	6775	0	A_55_P1974412	Kat2a	NM_020004	ref|Mus musculus K(lysine) acetyltransferase 2A (Kat2a), transcript variant 1, mRNA [NM_020004]	1.19802	0.027006	0.841196	0.0756397	7.69515	2	0	0	0	0.577059	0.718396	1.35839	1.19384	1.17335	1.22688	0.920785	0.770248	0.832554	1.17837	1.07289	0.977236
3065	DATA	7077	44	25	gb|BC004748|gb|AB041608|nap|NAP109763-1|nap|NAP001135-001	mm|chr1:60135040-60134982	0	NA	1433	ATATTCCCCTACCACTTCCCATGTTGGGGCTTGAAAATGAATGGCTGAGAAGAGAAAAAA	6522	0	A_55_P2148243	Wdr12	BC004748	gb|Mus musculus WD repeat domain 12, mRNA (cDNA clone MGC:7936 IMAGE:3583955), complete cds. [BC004748]	1.18902	0.162928	0.879956	0.177493	2.22187	3	0	0	0	0.89352	0.913755	0.986622	1.08303	1.10741	1.37663	1.04301	0.905964	0.690894	1.09693	1.04251	0.859721
3072	DATA	7109	44	57	ref|NM_008698|ens|ENSMUST00000136552|ens|ENSMUST00000038570|ref|XM_006514575	mm|chr11:4793499-4793558	0	NA	1169	CTTAGTTGCATAAAAGCAGGCATGACTGGCTGTTAGGAGGTATGGTGTGAAAGGGTATCA	6583	0	A_65_P20312	Nipsnap1	NM_008698	ref|Mus musculus 4-nitrophenylphosphatase domain and non-neuronal SNAP25-like protein homolog 1 (C. elegans) (Nipsnap1), mRNA [NM_008698]	0.832747	0.201798	1.1704	0.191995	2.09962	3	0	0	0	0.915004	0.778616	1.40318	0.943413	0.955002	0.599827	1.12708	1.00376	1.38035	0.937759	0.860873	1.09514
3073	DATA	7112	44	60	ref|NM_029457|ref|NR_027488|ens|ENSMUST00000023561|ref|XM_006522688	mm|chr16:22047889-22047948	0	NA	3045	TTTTGCAAGATCTAGTGCCTAGTGTTGCTTTTATGACGTAATAAAAGACTGGCAGAACCT	6589	0	A_55_P1994907	Senp2	NM_029457	ref|Mus musculus SUMO/sentrin specific peptidase 2 (Senp2), transcript variant 1, mRNA [NM_029457]	1.28136	0.142873	0.997191	0.11422	2.69076	3	0	0	0	0.911753	0.495054	0.655351	1.27099	1.14395	1.42913	1.12871	0.92287	0.939993	1.08236	1.03099	0.988853
3080	DATA	7127	44	75	ref|NM_010513|ens|ENSMUST00000005671|ref|XM_006540641|ref|XM_006540642	mm|chr7:75371556-75371615	0	NA	4980	CAACACTTAATAGCAACAGGACACTCGAGAATTGAGTCTCTTCGTTCTCTGCCTTTTTCT	6614	0	A_51_P318365	Igf1r	NM_010513	ref|Mus musculus insulin-like growth factor I receptor (Igf1r), mRNA [NM_010513]	0.873655	0.00403101	1.15279	0.214377	2.25488	2	0	0	0	1.07896	0.830025	1.1057	0.870136	0.878053	0.872775	0.91834	1.20123	1.33881	0.901627	1.0728	0.931535
3090	Mean	7149	44	97	ref|NM_009092|ens|ENSMUST00000119032|ens|ENSMUST00000119571|ens|ENSMUST00000134425	mm|chr7:88489244-88488675	0	NA	243	AAGTTGCAGAAAGAAGAGAGAGAGAGGAGAGATAATTACGTTCCTGAGGTCTCAGCCCTA	6654	0	A_55_P1989125	Rps17	NM_009092	ref|Mus musculus ribosomal protein S17 (Rps17), mRNA [NM_009092]	1.03905	0.0701768	0.933269	0.0258158	2.4503	2	0	0	0	0.943122	1.08024	1.07596	1.11929	1.00876	0.989104	0.961773	0.926574	0.91146	1.06782	0.988967	0.926927
3091	DATA	7150	44	98	ref|NM_145429|ref|NM_001271359|ref|NM_001271360|ref|NM_001271358	mm|chr11:70253715-70253774	0	NA	1339	CTGAAGGGAATGAAGGATGATGACTGTGATGACCAGTTTTGCTAGGACGAGGGGCTGGGA	6656	0	A_51_P146058	Arrb2	NM_145429	ref|Mus musculus arrestin, beta 2 (Arrb2), transcript variant 3, mRNA [NM_145429]	1.36122	0.451576	0.77753	0.076025	2.2077	2	0	0	0	0.905296	0.877457	0.863034	1.19434	1.01682	1.87248	0.783539	0.850372	0.698678	0.93452	1.04542	0.958041
3094	DATA	7158	44	106	ens|ENSMUST00000125019|gb|AK019899|riken|5330420P17|nap|NAP075369-1	mm|chr16:32033318-32033259	0	NA	1086	GGGCTTATTGGCACTATAATGCTTTTCATGATTAATTAAGGTACCCATGATGCTTCATAA	6670	0	A_55_P2713700	Pak2	ENSMUST00000125019	ens|p21 protein (Cdc42/Rac)-activated kinase 2 [Source:MGI Symbol;Acc:MGI:1339984] [ENSMUST00000125019]	1.23674	0.0946063	0.465451	0.407711	3.19182	2	0	0	0	0.922937	1.08317	1.00369	1.34378	1.1643	1.20215	0.000303764	0.760929	0.63512	1.25024	1.49882	1.13456
3098	DATA	7166	44	114	ref|XM_006516792|gb|AK182625|tc|NP1284986	mm|chr13:21485325-21480538	0	NA	499	AATTAAGATTCCTTCTTCCCAGATCAGGACATGCAGACTAAGGTTAGGGACTTGCCTCGA	6685	0	A_55_P2739559	Zkscan3	XM_006516792	ref|PREDICTED: Mus musculus zinc finger with KRAB and SCAN domains 3 (Zkscan3), transcript variant X4, mRNA [XM_006516792]	1.25602	0.0450047	0.783701	0.295454	2.73731	2	0	0	0	1.04219	0.867645	1.26336	1.21361	1.25122	1.30323	0.499449	0.762446	1.08921	0.885374	0.905747	0.916522
3103	DATA	7179	44	127	ref|NM_134032|ens|ENSMUST00000100523|ref|XM_006531932|gb|BC019414	mm|chr11:96215122-96215181	0	NA	1422	TGGTAAAACTCCTTCCAACGAAATCTCAGGAATAATTAAACTCTAGTGGGAGAGGGTTTT	6707	0	A_52_P15300	Hoxb2	NM_134032	ref|Mus musculus homeobox B2 (Hoxb2), mRNA [NM_134032]	1.08796	0.176021	0.832166	0.143822	1.94909	3	0	0	0	1.57088	1.34432	0.862145	0.952728	1.02416	1.28698	0.899798	0.929705	0.666995	1.0829	0.863651	0.515738
3106	DATA	7191	44	139	ref|NM_181040|ens|ENSMUST00000176047|ens|ENSMUST00000184179|gb|BC044874	mm|chr4:115484465-115484523	0	NA	1875	AACTCTGCCTGTGAGAAGCTGATGAATCACTACAGGTGTAAATAAAACCTTTTTCTAAGG	6729	0	A_55_P2798042	Atpaf1	NM_181040	ref|Mus musculus ATP synthase mitochondrial F1 complex assembly factor 1 (Atpaf1), mRNA [NM_181040]	0.977554	0.00504644	1.00903	0.0399977	1.35243	2	0	0	0	1.21042	0.91328	0.869288	0.980979	0.971759	0.979925	1.055	0.982164	0.989935	1.02971	0.947261	1.07028
3108	DATA	7193	44	141	gb|BB759059|tc|TC1703941	mm|chr10:126726850-126726791	0	NA	406	GGATTCTACCTTACTCATTTGTAAATTAAACAACGATAAAGGTAAAAAGCAGCTCTGTGG	6733	0	A_55_P2038682	BB759059	BB759059	gb|BB759059 RIKEN full-length enriched, melanocyte Mus musculus cDNA clone G270106C04 3', mRNA sequence [BB759059]	1.37362	0.206259	0.579905	0.513367	2.48487	2	0	0	0	0.843675	1.35052	0.483704	1.36574	1.58371	1.17142	0.978226	0.760944	0.000545479	1.46461	0.701395	1.29551
3109	DATA	7195	44	143	ref|NM_177878|ens|ENSMUST00000057773|gb|AK049381|gb|BC038925	mm|chr5:138636477-138636536	0	NA	935	ACACAGTCAAGACAAGCAATATTTGTCACGTGCAGCTTTCTAGGAGGCAGCTTCCAAACA	6737	0	A_51_P162116	Mblac1	NM_177878	ref|Mus musculus metallo-beta-lactamase domain containing 1 (Mblac1), mRNA [NM_177878]	0.745916	0.133429	1.125	0.143519	3.3506	3	0	0	0	1.12538	1.18548	1.08686	0.894659	0.636759	0.70633	0.962986	1.2362	1.17581	0.945665	1.11706	0.926813
3111	DATA	7197	44	145	tc|TC1615392|nap|NAP052385-1	mm|chr10:039609971-039609912	0	NA	2686	TGACTTTCTCAAGTTTTATGCTGAGTGACAATGAATTGCTATGTGACTGCAATATGTTTG	6741	0	A_52_P336768	TC1615392	TC1615392	tc|BC018406 expressed sequence AI317395 {Mus musculus} (exp=-1; wgp=0; cg=0), partial (73%) [TC1615392]	0.711163	0.139912	1.09981	0.259189	2.28543	3	0	0	0	1.69165	0.938249	1.04951	0.717091	0.568381	0.848016	0.864442	1.37759	1.05739	0.94044	1.01622	0.931022
3113	DATA	7210	44	158	gb|AK053272|tc|TC1589336|riken|E130003O13|nap|NAP124987-1	mm|chr9:53383740-53383681	0	NA	1694	GCTGGGATTACTGGCTTGTGCCCCCATCTTGACCTCCATTTGCTATTCAGTATCAATTAA	6765	0	A_55_P2087785	Gm9963	AK053272	gb|Mus musculus 0 day neonate eyeball cDNA, RIKEN full-length enriched library, clone:E130003O13 product:hypothetical protein, full insert sequence. [AK053272]	0.878672	0.143741	1.11328	0.147748	1.97133	3	0	0	0	1.20315	1.03224	0.962875	0.712949	0.953578	0.969489	1.0612	0.998629	1.28002	0.957154	0.960372	0.908349
3114	DATA	7212	44	160	ref|NM_029688|ens|ENSMUST00000041500|gb|AK161066|gb|AK089976	mm|chr2:151937009-151937068	0	NA	2708	GAAGAATGTATGGGAACTCTAGTCTCTGCAACTTTTCTGTAAATCCAAAGTCATTCTAAA	6769	0	A_55_P2033120	Srxn1	NM_029688	ref|Mus musculus sulfiredoxin 1 homolog (S. cerevisiae) (Srxn1), mRNA [NM_029688]	1.1898	0.0821237	0.897729	0.108457	3.7186	3	0	0	0	0.515159	0.905766	1.16865	1.09622	1.24987	1.22331	1.02189	0.849836	0.821463	1.09685	0.879705	1.17128
3118	DATA	7219	45	3	tc|TC1597894|nap|NAP121919-001	mm|chr2:023365128-023365187	0	NA	3384	TTATTAGACCAAACCAGTCCTCATTGCTCTAACATGTTGAAGAAGCCATCTGAGGGGGAG	6781	0	A_55_P2141585	TC1597894	TC1597894	tc|UB2D3_HUMAN (P61077) Ubiquitin-conjugating enzyme E2 D3 (Ubiquitin-protein ligase D3) (Ubiquitin carrier protein D3) (Ubiquitin-conjugating enzyme E2-17 kDa 3) (E2(17)KB 3) , complete [TC1597894]	0.887045	0.0618348	1.40038	0.24239	3.5543	2	0	0	0	1.09258	0.43436	1.11564	0.916058	0.929038	0.816039	1.3114	1.21505	1.67468	0.837723	0.754653	0.902773
3120	DATA	7226	45	10	ref|NM_007688|ens|ENSMUST00000078124|ref|XM_006515452|gb|AK147174	mm|chr12:55961504-55961445	0	NA	1239	TTTCAAAGAAACAGCTGTGCTAATGTCTTTGGTTTCCCGATGAGTGTACACTACTGTATA	6792	0	A_66_P100159	Cfl2	NM_007688	ref|Mus musculus cofilin 2, muscle (Cfl2), mRNA [NM_007688]	0.806045	0.116511	1.23203	0.0286665	6.14926	2	0	0	0	1.26374	0.90355	1.02024	0.703644	0.781679	0.932813	1.26037	1.23267	1.20305	0.875972	0.959668	0.862605
3135	DATA	7273	45	57	ref|NM_011891|ens|ENSMUST00000077221|ref|XM_011249013|gb|AB024923	mm|chr11:46939117-46939058	0	NA	467	TAAAAACTGTTTCTGGAAAATTGCTCTTTTCTGCGGATGACAGTGAAGTGGTCGTGGGAG	6877	0	A_55_P2138714	Sgcd	NM_011891	ref|Mus musculus sarcoglycan, delta (dystrophin-associated glycoprotein) (Sgcd), mRNA [NM_011891]	0.86868	0.0949315	1.30078	0.319785	2.24359	2	0	0	0	1.00931	0.877807	0.716603	0.931336	0.915246	0.759456	1.14081	1.09254	1.66898	0.982235	1.06964	0.836036
3139	DATA	7283	45	67	ens|ENSMUST00000120913|nap|NAP000003-013	mm|chr11:109021233-109021174	0	NA	275	AGAGTATGTCATGGAGTCTACTGGCATCTTTACCACCATGGAGAAGTTCCAGACTCACTT	6897	0	A_52_P272054	ENSMUST00000120913	ENSMUST00000120913	ens|predicted gene 11658 [Source:MGI Symbol;Acc:MGI:3650797] [ENSMUST00000120913]	0.741728	0.0790995	1.32394	0.0869705	8.57789	3	0	0	0	1.1842	0.550422	0.727248	0.797523	0.776456	0.651205	1.25797	1.29136	1.4225	0.980177	1.08111	1.27983
3140	DATA	7284	45	68	ref|NM_019727|ens|ENSMUST00000139872|ens|ENSMUST00000034946|gb|AK149850	mm|chr9:65945250-65944426	0	NA	804	TTCTTCCGCAGAGTTTCTTGAGAAACGGAGGGCTGCTTTGGAAAGGTACCTTCAAAGAAT	6899	0	A_55_P2589657	Snx1	NM_019727	ref|Mus musculus sorting nexin 1 (Snx1), mRNA [NM_019727]	1.2211	0.0981969	0.77292	0.341942	2.18198	2	0	0	0	1.09338	1.02434	1.01267	1.13427	1.32767	1.20135	0.74582	1.1276	0.445334	0.980304	1.12319	0.784067
3142	DATA	7291	45	75	ref|NM_144787|ref|NM_001172095|ens|ENSMUST00000149295|ens|ENSMUST00000156065	mm|chr4:73976574-73976633	0	NA	1161	GACATGGTGAAGATATCAATGGATATATTTGTGAAGAAATTTCAGCCAGATAGATACCAG	6913	0	A_52_P320170	Kdm4c	NM_144787	ref|Mus musculus lysine (K)-specific demethylase 4C (Kdm4c), transcript variant 1, mRNA [NM_144787]	0.994375	0.0556455	0.823835	0.0651892	3.44636	3	0	0	0	1.20062	0.269235	1.71586	0.93808	1.04935	0.995699	0.830088	0.885672	0.755745	1.05332	1.22801	1.07833
3160	Mean	7331	45	115	ens|ENSMUST00000173844|ens|ENSMUST00000173480|ens|ENSMUST00000085163|ref|XM_006524624	mm|chr17:33960193-33960058	0	NA	259	CCCTATTGTAGTCAGAAAGAGAAGCTCGAAGGTTGCGTTAATCTTGCAGCTGGTGGGGTT	6989	0	A_55_P2027640	Rps28	ENSMUST00000173844	ens|ribosomal protein S28 [Source:MGI Symbol;Acc:MGI:1859516] [ENSMUST00000173844]	0.9526	0.0105319	1.0223	0.0553687	2.14202	2	0	0	0	1.01132	1.02264	1.00124	0.940767	0.960945	0.956089	1.01512	1.08091	0.970878	1.0298	1.0441	0.966188
3163	DATA	7335	45	119	ref|NM_001198911|ref|NM_008487|ref|NM_001198912|ref|NM_001198913	mm|chr3:88451911-88451970	0	NA	4358	TCACTGAAGAGGGCATGAATGGATGCAGCTGCTCAAACTCTTATTAAAAATCTTAAAATT	6997	0	A_55_P2125229	Arhgef2	NM_001198911	ref|Mus musculus rho/rac guanine nucleotide exchange factor (GEF) 2 (Arhgef2), transcript variant 2, mRNA [NM_001198911]	1.12025	0.119765	0.838595	0.0300519	3.95086	2	0	0	0	0.969739	1.07435	1.2882	1.25794	1.04025	1.06256	0.807843	0.867894	0.840048	0.933073	0.982047	0.876048
3167	DATA	7343	45	127	ref|NM_001293759|ref|NM_001293757|ref|NM_011722|ref|NM_001293758	mm|chr8:35153757-35153698	0	NA	1067	GCCCGGCTGTTAGCACCGTGCTGACTTTCCATTGGAGACTTGAGTTGGAGAGAGGTGGGT	7011	0	A_66_P123954	Dctn6	NM_001293759	ref|Mus musculus dynactin 6 (Dctn6), transcript variant 4, mRNA [NM_001293759]	0.871958	0.100689	1.15514	0.124748	3.05954	3	0	0	0	1.15409	1.07885	0.867778	0.813825	0.813825	0.988224	1.12521	1.04808	1.29213	0.888538	0.957033	0.972418
3170	DATA	7351	45	135	ref|NM_001123367|ref|NM_001123368|ref|NM_011560|ref|NM_198104	mm|chr17:15132862-15132803	0	NA	671	AAACATGAAACAGAGTCTTACGTGGTATTGGCCTTGGTGTTTGCTCTCTATTGTGAATAG	7025	0	A_55_P1987196	Gm3448	NM_001123367	ref|Mus musculus predicted gene 3448 (Gm3448), mRNA [NM_001123367]	0.589553	0.534533	2.24883	0.298725	4.69337	3	0	0	0	1.10582	0.75745	0.732032	1.04422	0.000717678	0.723719	2.59321	2.05974	2.09353	0.888127	0.000717678	0.000717678
3172	DATA	7354	45	138	ref|NM_001042407|ens|ENSMUST00000125432|ens|ENSMUST00000103180|gb|AK043682	mm|chr4:154445949-154446008	0	NA	1080	TAAAACCTCCACACCGTTCTTTTGTCACATAAGCTACTACAGTTACCTGGAAAAAAGGGG	7031	0	A_51_P493256	Pex10	NM_001042407	ref|Mus musculus peroxisomal biogenesis factor 10 (Pex10), mRNA [NM_001042407]	0.906922	0.0791504	1.189	0.227494	2.0284	2	0	0	0	1.10245	0.765742	0.66562	0.842424	0.883094	0.99525	1.06602	1.45152	1.04948	1.16516	0.944248	1.06901
3173	DATA	7356	45	140	ref|NM_007687|ens|ENSMUST00000065243|ens|ENSMUST00000116560|ens|ENSMUST00000118840	mm|chr19:5493399-5493458	0	NA	551	AAGCTAACTGCTACGAGGAGGTCAAGGACCACTGCACCCTGGCAGAGAAACTAGGTGGCA	7035	0	A_55_P1974788	Cfl1	NM_007687	ref|Mus musculus cofilin 1, non-muscle (Cfl1), mRNA [NM_007687]	0.922991	0.0192712	1.08133	0.1145	2.36193	2	0	0	0	1.1838	0.871892	1.09841	0.916411	0.907871	0.94469	1.15076	1.14404	0.94917	0.927611	0.898492	1.00685
3177	DATA	7369	45	153	gb|BC098458|gb|BC083319|gb|BC005547|gb|AK214079	mm|chr7:135024725-135024784	0	NA	3263	TCCTGTGTCCTGACATCACTTGTACAGATACCACCATTAAAGCAATTCATAGTGAAAAAA	7061	0	A_55_P1959703	Zfp646	BC098458	gb|Mus musculus cDNA clone IMAGE:30101479, **** WARNING: chimeric clone ****. [BC098458]	1.16818	0.0151656	1.06653	0.0693004	2.48199	2	0	0	0	0.520991	1.03698	1.01261	1.16423	1.18493	1.15538	1.12993	0.992548	1.07709	0.916845	0.924179	0.884278
3179	DATA	7374	45	158	gb|AK138764|tc|TC1678216|riken|A430056F21	mm|chr19:4777379-4777320	0	NA	1704	GTATGTCTATGTACCATGCTCATGCCTAATACGCTCAGGTCAGAATAAAGTCATTAGATT	7069	0	A_55_P2287269	AI415730	AK138764	gb|Mus musculus 0 day neonate thymus cDNA, RIKEN full-length enriched library, clone:A430056F21 product:unclassifiable, full insert sequence. [AK138764]	1.17907	0.142153	0.816101	0.161465	2.92241	3	0	0	0	0.508613	0.817481	1.04658	1.20223	1.02676	1.30822	0.631094	0.888599	0.92861	1.28941	1.21227	1.14015
3182	DATA	7379	45	163	ref|NM_028881|ens|ENSMUST00000149422|ens|ENSMUST00000184882|ens|ENSMUST00000130002	mm|chr3:90067812-90067871	0	NA	2393	AATTCAAGGGAGGGCCTAAAAGCACTTGTAACTTTGAAAACCGTCTGTCTGGAGGTCAGA	7079	0	A_51_P520980	Crtc2	NM_028881	ref|Mus musculus CREB regulated transcription coactivator 2 (Crtc2), mRNA [NM_028881]	1.11864	0.13402	0.865113	0.099394	2.63176	3	0	0	0	0.563129	1.16536	1.29308	1.25297	1.11802	0.984932	0.77473	0.849047	0.971561	1.00584	1.06158	0.959745
3185	DATA	7384	46	4	ref|NM_010248|ref|NM_001162477|ens|ENSMUST00000004622|gb|AK149184	mm|chr7:104456470-104456529	0	NA	5016	TATTTGTTGGGAAGAAAAAATGAAATAGAAGCAACCTAGTCTTACATCGTGTCTTGTTAC	6784	0	A_66_P102828	Gab2	NM_010248	ref|Mus musculus growth factor receptor bound protein 2-associated protein 2 (Gab2), transcript variant 1, mRNA [NM_010248]	0.787603	0.269874	1.30617	0.182306	2.75785	3	0	0	0	1.15442	0.517092	1.12498	0.852896	1.01884	0.491073	1.1685	1.23707	1.51292	1.01884	0.960917	0.942444
3187	DATA	7390	46	10	ref|NM_011254|gb|AK011641|gb|BC091751|gb|X60367	mm|chr9:98346908-98346967	0	NA	2565	TGCCTGGTCTCTTTTCCTTTTCTTAAAATGAAGCGACCCCAATAAAAGTGATCTCTGTTT	6793	0	A_55_P2059010	Rbp1	NM_011254	ref|Mus musculus retinol binding protein 1, cellular (Rbp1), mRNA [NM_011254]	0.847429	0.0796211	1.04644	0.211067	1.528	2	0	0	0	1.16829	1.00644	1.31037	0.865521	0.916448	0.760319	1.29014	0.926912	0.922261	0.972955	0.91575	0.944585
3194	DATA	7411	46	31	ref|NM_013915|ref|NM_001012330|ens|ENSMUST00000195612|ens|ENSMUST00000077225	mm|chr1:179380753-179380812	0	NA	4801	GACTGACATCTAGCTTTGACAATCATAGTATGTTTTATTTCCTGAGGGGGAATAACTTAT	6832	0	A_55_P2773669	Zbtb18	NM_013915	ref|Mus musculus zinc finger and BTB domain containing 18 (Zbtb18), transcript variant 2, mRNA [NM_013915]	0.866193	0.044878	1.22442	0.0887438	6.2392	2	0	0	0	0.979137	0.607686	0.890134	0.817414	0.905732	0.875432	1.13865	1.21874	1.31586	1.17516	0.998634	1.07741
3203	DATA	7436	46	56	ens|ENSMUST00000171735|ens|ENSMUST00000164617|gb|AK088377|gb|AK014314	mm|chr14:32015111-32015052	0	NA	1703	GTCAGGATTCAGAGCAAGATACTGAAGACAAGATGAGAACACTGGGAAGAACTTTCATTT	6876	0	A_55_P2719955	Nisch	ENSMUST00000171735	ens|nischarin [Source:MGI Symbol;Acc:MGI:1928323] [ENSMUST00000171735]	1.13084	0.313653	0.651696	0.124478	2.45933	2	0	0	0	1.17247	0.899269	1.20927	1.43483	1.14936	0.808341	0.512156	0.751317	0.691615	1.04151	1.33262	0.997245
3210	DATA	7453	46	73	ref|NM_025651|ref|NM_001164828|ens|ENSMUST00000176597|ens|ENSMUST00000177402	mm|chr9:105303875-105303934	0	NA	1657	ATCCCTACTTTTCTGAAGTTGCCCATTGCTGTGACTTGTTACTGGTTGCAGTCCACAGAA	6910	0	A_66_P133983	Aste1	NM_025651	ref|Mus musculus asteroid homolog 1 (Drosophila) (Aste1), transcript variant 1, mRNA [NM_025651]	1.28873	0.290585	0.987146	0.110237	1.68071	2	0	0	0	0.943305	0.512301	0.836384	1.1093	1.13288	1.62399	0.868307	1.08606	1.00707	0.818592	0.811952	1.24985
3217	DATA	7464	46	84	ref|NM_025661|ens|ENSMUST00000052919|gb|AK009621|gb|AK154085	mm|chr11:98442667-98442608	0	NA	1963	CTTCTGGTCTTTCTAAGCAAAGTGTGAATAGGATTTTTACTCCCTTTGTACAGTATTCTG	6929	0	A_55_P2059347	Ormdl3	NM_025661	ref|Mus musculus ORM1-like 3 (S. cerevisiae) (Ormdl3), mRNA [NM_025661]	0.78805	0.271644	1.19323	0.2432	1.9248	3	0	0	0	1.09667	0.985154	0.842333	0.862161	1.01495	0.487041	1.02964	1.07735	1.4727	1.12284	1.02713	0.982034
3218	DATA	7465	46	85	ref|NM_010292|ref|NM_001287386|ens|ENSMUST00000109823|ens|ENSMUST00000102920	mm|chr11:5800992-5800933	0	NA	2560	ACATCAGTGATCCGGGAAGAGAAGCAAGCCACCCACAGCATCTCTCCAGGAAACCACCCA	6931	0	A_55_P2121956	Gck	NM_010292	ref|Mus musculus glucokinase (Gck), transcript variant 1, mRNA [NM_010292]	1.72918	0.573818	0.559472	0.0876203	3.49026	2	0	0	0	0.646533	0.461613	0.97299	2.38586	1.47726	1.32441	0.589417	0.460805	0.628194	1.01258	1.05006	0.990279
3223	DATA	7479	46	99	ref|NM_009744|ens|ENSMUST00000023151|gb|AK036975|gb|AK039228	mm|chr16:23965219-23965160	0	NA	3203	CAGGGTTTGGCTGTGTCTAAACTGCATTAGTGCGTTGTAAAATAGAGCTGTACAAAACAT	6958	0	A_52_P161495	Bcl6	NM_009744	ref|Mus musculus B cell leukemia/lymphoma 6 (Bcl6), mRNA [NM_009744]	1.37578	0.478895	0.748601	0.207413	2.08152	2	0	0	0	0.910934	0.885212	0.683596	0.999672	1.21277	1.9149	0.694807	0.977612	0.573385	0.968933	0.951574	1.2266
3224	DATA	7480	46	100	ref|NM_021392|ens|ENSMUST00000143241|ens|ENSMUST00000134100|ref|XM_006504551	mm|chr5:138619700-138619759	0	NA	1502	TACGTAATTCGGATTTGAAGCTCCCCAAGCAAGGATATGGACAGCAATGTGAGCAGGCAG	6960	0	A_51_P393067	Ap4m1	NM_021392	ref|Mus musculus adaptor-related protein complex AP-4, mu 1 (Ap4m1), mRNA [NM_021392]	1.28667	0.0413944	0.703406	0.487532	2.06473	2	0	0	0	0.65865	1.01095	0.920385	1.24134	1.29621	1.32246	0.848553	1.10188	0.159784	1.19768	1.2496	0.992511
3225	DATA	7483	46	103	ref|NM_134094|ref|NM_001170866|ref|NM_001170867|ref|NM_001170868	mm|chr15:37298005-37297946	0	NA	1652	GAAAAGATGGCTCAGCTGTTTGTTTTGTTTTGTTTTGTTTTGTTTTTCTCCCACAGGTTT	6966	0	A_55_P2910874	Ncald	NM_134094	ref|Mus musculus neurocalcin delta (Ncald), transcript variant 1, mRNA [NM_134094]	0.933386	0.0996558	1.12921	0.129013	2.08059	3	0	0	0	0.897822	0.950778	1.07344	0.818603	0.983715	0.997841	1.0569	1.05257	1.27816	0.96753	0.990955	0.931682
3226	DATA	7486	46	106	ref|NM_011585|ref|NM_001164078|ref|NM_001164079|ens|ENSMUST00000134142	mm|chr6:86380500-86380559	0	NA	1577	TCATGAAATTACTTTTCATCCACATTGTTTTAAAAAGGAACACGATGGTGGATGTTTGCC	6972	0	A_52_P516059	Tia1	NM_011585	ref|Mus musculus cytotoxic granule-associated RNA binding protein 1 (Tia1), transcript variant 1, mRNA [NM_011585]	1.14289	0.121618	0.732213	0.100772	4.50366	3	0	0	0	1.05694	0.996805	0.957398	1.1968	1.00364	1.22824	0.698356	0.845553	0.65273	1.09384	1.13986	1.12983
3235	DATA	7502	46	122	gb|AK080962|tc|TC1601341|riken|B430219K18	mm|chr14:28248648-28248707	0	NA	2741	AATCACTTTTAATTTTTAGAGCTACTATTGTGATACATGCCTAGTTAGTTAAAGATCCAG	7003	0	A_51_P445336	B130052P14Rik	AK080962	gb|Mus musculus 4 days neonate male adipose cDNA, RIKEN full-length enriched library, clone:B430219K18 product:unclassifiable, full insert sequence. [AK080962]	1.19229	0.364653	0.000791418	7.12895e-11	5.65947	2	0	0	0	0.6977	1.09875	4.37852	1.07963	0.89727	1.59998	0.000791418	0.000791418	0.000791418	0.000791418	1.04731	1.19768
3237	DATA	7504	46	124	ref|NM_023912|ens|ENSMUST00000025890|ref|XM_006531856|ref|XM_006531857	mm|chr19:5758540-5758481	0	NA	2523	CCACTGGAGAGCAGGCCCGGCGGATGTATTTATTGTACAAACCATGTGAGCCTGGTCAGC	7007	0	A_51_P498023	Scyl1	NM_023912	ref|Mus musculus SCY1-like 1 (S. cerevisiae) (Scyl1), mRNA [NM_023912]	1.10461	0.0963887	0.948876	0.0456387	2.52928	2	0	0	0	1.0377	0.940801	1.02839	1.03557	1.06353	1.21473	0.913647	0.932548	1.00043	0.983927	0.880503	0.968221
3238	DATA	7507	46	127	ref|NM_007801|ens|ENSMUST00000127842|ens|ENSMUST00000123320|ens|ENSMUST00000034915	mm|chr9:89970828-89970887	0	NA	1517	ACCTAGAATCGTCTCTCTTTCCAGCTCTCTTCATGTACTGGGAGCTGTAATGGTTACCTT	7012	0	A_52_P51078	Ctsh	NM_007801	ref|Mus musculus cathepsin H (Ctsh), mRNA [NM_007801]	0.95355	0.109651	1.15736	0.0852909	2.54116	3	0	0	0	1.06424	0.920093	0.925376	0.881907	0.898962	1.07978	1.08159	1.14076	1.24973	0.873605	0.889001	0.994956
3239	DATA	7510	46	130	ref|NM_019998|ens|ENSMUST00000044148|ref|XM_006538124|gb|AK010673	mm|chr4:47482813-47482754	0	NA	2946	CCAGTAATAACTGTTCGTTGTTGTTTACCTGTTGCTTGTAAGTGCAAGTATTAAAGCAAT	7018	0	A_55_P1965674	Alg2	NM_019998	ref|Mus musculus asparagine-linked glycosylation 2 (alpha-1,3-mannosyltransferase) (Alg2), mRNA [NM_019998]	0.810126	0.110547	1.13309	0.0828233	4.0497	3	0	0	0	1.21558	0.92421	1.00273	0.839486	0.903029	0.687862	1.09779	1.22772	1.07377	0.898379	1.11845	1.011
3240	DATA	7513	46	133	ref|NM_001163502|ref|NM_001163501|ens|ENSMUST00000046266|ref|XM_006515843	mm|chr12:85490398-85490339	0	NA	6985	CTGCCTTTCATGTGTTTGTTGCCTGTGGCACTCTTTTTAAAAAAGACTGTTACATATTAA	7022	0	A_55_P2037613	Elmsan1	NM_001163502	ref|Mus musculus ELM2 and Myb/SANT-like domain containing 1 (Elmsan1), transcript variant 1, mRNA [NM_001163502]	0.893984	0.116493	1.17466	0.152414	2.5342	3	0	0	0	1.05425	0.982867	0.975614	0.779954	0.889206	1.01279	1.03455	1.15248	1.33695	1.02627	0.813764	0.941291
3246	DATA	7523	46	143	gb|DQ059756	mm|chr1:73441963-73441904	0	NA	905	TAATGCAGGACTTTAAAAAGTCCCTCCCGTTTCCAAAATGAACAGTTTGTCTTGAAAAAA	7042	0	A_55_P2744664	Pinc	DQ059756	gb|Mus musculus pregnancy-induced noncoding RNA mRNA, complete sequence. [DQ059756]	1.66884	0.291802	0.306718	0.297274	5.66373	3	0	0	0	1.5029	1.09731	0.838245	1.41215	1.60818	1.98621	0.000396021	0.594032	0.325727	0.820754	0.664655	1.14945
3263	DATA	7572	47	28	ref|NM_181075|ens|ENSMUST00000100850|gb|BC089033|gb|BC096574	mm|chr5:115272472-115272413	0	NA	418	GATTATAACTCAAGCACTTCCCTGAAGTTTGGTTATCTATGCTCAAGAATTAGTCGGCAT	7131	0	A_65_P09285	2610524H06Rik	NM_181075	ref|Mus musculus RIKEN cDNA 2610524H06 gene (2610524H06Rik), mRNA [NM_181075]	0.577168	0.18406	1.41336	0.359967	3.58234	2	0	0	0	0.669205	0.709583	0.569519	0.39963	0.564752	0.767121	1.70052	1.53002	1.00953	1.30518	1.16021	1.61473
3269	DATA	7583	47	39	ref|NM_033072|ens|ENSMUST00000026476|ens|ENSMUST00000126243|ens|ENSMUST00000136169	mm|chr10:126719081-126719022	0	NA	3976	TGTGGGGCCTCCACTGCTTTTCTATGGGAGACACTCTTAATTTAACAGATGAGAATATTT	7152	0	A_52_P395064	Mbd6	NM_033072	ref|Mus musculus methyl-CpG binding domain protein 6 (Mbd6), mRNA [NM_033072]	1.10783	0.0582013	0.676527	0.0724962	8.03539	3	0	0	0	0.986503	1.17793	1.40136	1.14775	1.04105	1.13469	0.650834	0.758371	0.620377	1.00135	1.21081	0.868973
3275	DATA	7595	47	51	ens|ENSMUST00000184842|ref|XR_378400|gb|AK041647|gb|AK172683	mm|chr7:113654039-113653980	0	NA	1146	GTAAAACAGCAAACAGAAGAGTCTTTGAATGTTTACATCAGGAGCAGCTATAGTGGCTTT	7174	0	A_51_P175681	ENSMUST00000184842	ENSMUST00000184842	ens|predicted gene 8995 [Source:MGI Symbol;Acc:MGI:3644223] [ENSMUST00000184842]	1.24577	0.168457	0.820513	0.252684	2.42539	3	0	0	0	1.47864	0.292093	0.800235	1.18745	1.11422	1.43564	0.587235	0.785378	1.08893	0.941296	1.0001	1.28879
3279	DATA	7604	47	60	gb|AK143367|riken|E330016G04	mm|chr18:32364328-32364387	0	NA	1777	GCACATGGTCATGCATATGTGTAGACTCATACATGCACAGAAATAAAAGTTATAAGGTAA	7190	0	A_55_P2735465	Map3k2	AK143367	gb|Mus musculus 2 days pregnant adult female ovary cDNA, RIKEN full-length enriched library, clone:E330016G04 product:mitogen activated protein kinase kinase kinase 2, full insert sequence. [AK143367]	1.44046	0.287668	0.654947	0.0964	4.48449	2	0	0	0	1.49156	0.44287	0.717705	1.66112	1.11511	1.54516	0.75951	0.569607	0.635722	1.13901	1.13779	0.784838
3280	DATA	7612	47	68	ref|NM_001164231|ens|ENSMUST00000094294|ens|ENSMUST00000130467|ens|ENSMUST00000129229	mm|chr11:43533772-43533831	0	NA	1732	GAACAACAGGACTGAATAAGATTGGAGCTTTAAACTGCACTAAGAAGTAAATGTAAAGGC	7203	0	A_66_P108263	Pwwp2a	NM_001164231	ref|Mus musculus PWWP domain containing 2A (Pwwp2a), transcript variant 1, mRNA [NM_001164231]	1.09166	0.0954424	0.366005	0.414366	2.95584	2	0	0	0	1.75335	0.507445	0.978754	1.1988	1.06045	1.01573	0.281605	0.816074	0.000337453	1.51123	1.71286	1.16337
3283	DATA	7619	47	75	ref|NM_175027|ref|NM_001146081|ens|ENSMUST00000167446|ref|XM_006528832	mm|chrX:161434946-161435005	0	NA	2256	GCCAAAATCCGTCAGTCCAAGCGCAAAGTTCAGAGAGAAAGGATACTGAAGCACCTTAAT	7215	0	A_52_P208613	Fancb	NM_175027	ref|Mus musculus Fanconi anemia, complementation group B (Fancb), transcript variant 2, mRNA [NM_175027]	1.13937	0.144262	0.887583	0.045067	2.88553	2	0	0	0	0.848862	1.00395	0.641264	1.09996	1.01891	1.29924	0.839398	0.928695	0.894656	1.02288	1.15034	1.25185
3288	DATA	7635	47	91	ref|NM_177790|ens|ENSMUST00000103119|ref|XM_006533490|ref|XM_006533488	mm|chr11:100491290-100491231	0	NA	1043	ATCGTGGGGGCCGGCAGGGACCCAGCCCTCCTTTCCATTGTGCCCTCTGTCAGCTCCATG	7246	0	A_66_P108357	Zfp385c	NM_177790	ref|Mus musculus zinc finger protein 385C (Zfp385c), mRNA [NM_177790]	0.952715	0.208505	1.19136	0.0916166	1.81493	2	0	0	0	0.979966	1.17953	0.177215	1.09642	1.04815	0.713573	1.16339	1.11698	1.2937	1.1117	1.08757	1.0318
3294	DATA	7650	47	106	ref|NM_009166|ref|NM_001034962|ref|NM_001034963|ref|NM_001034964	mm|chr19:40448104-40448045	0	NA	731	AGTCCTTTAGTAAACGAAGTTTCTTCTTCCCACATTGAAACCGATTCCCAAGACTTCCCT	7272	0	A_55_P2740818	Sorbs1	NM_009166	ref|Mus musculus sorbin and SH3 domain containing 1 (Sorbs1), transcript variant 1, mRNA [NM_009166]	1.13035	0.153349	0.889824	0.110464	2.20438	3	0	0	0	0.816064	0.919166	1.24236	0.990581	1.1061	1.29439	0.76339	0.967643	0.938438	0.896879	1.16699	0.898002
3300	DATA	7663	47	119	ref|NM_025661|ens|ENSMUST00000120064|ens|ENSMUST00000052919|gb|AK012718	mm|chr11:98444092-98444033	0	NA	538	GACTGTGCTCATGCCCAAGTTTCCCCAGCTCCACGGAGTCCGGATCTTTGGAATCAATAA	7294	0	A_66_P101901	Ormdl3	NM_025661	ref|Mus musculus ORM1-like 3 (S. cerevisiae) (Ormdl3), mRNA [NM_025661]	0.882935	0.177549	1.18642	0.181543	2.07008	3	0	0	0	1.23336	1.04392	0.69456	0.968947	0.678762	1.0011	1.04877	1.39217	1.11834	0.480593	0.845334	1.49416
3303	DATA	7669	47	125	ref|NM_026654|ens|ENSMUST00000030451|ref|XM_006503353|gb|AK046576	mm|chr4:116476845-116476786	0	NA	1770	AGTCATTTGAGTCTTTAATCTAATTATGTCACATTTAACTGCTACAGAGTTGTCGAGCAG	7305	0	A_51_P308814	Toe1	NM_026654	ref|Mus musculus target of EGR1, member 1 (nuclear) (Toe1), mRNA [NM_026654]	0.743356	0.0647593	1.12626	0.216622	2.9333	2	0	0	0	1.11491	0.854978	1.35308	0.713387	0.817672	0.699011	1.10075	1.3545	0.923519	0.97016	1.02571	1.07232
3305	DATA	7684	47	140	gb|AK035904|riken|9630016K09|nap|NAP079043-1	mm|chr3:99904896-99904837	0	NA	2932	ATAAAACCTCAAATTGGAGTTTGTGGTGGTTTGAATATGCTTGCCTCTGGTAGTGGCACT	7331	0	A_55_P2374197	Spag17os	AK035904	gb|Mus musculus 16 days neonate cerebellum cDNA, RIKEN full-length enriched library, clone:9630016K09 product:unclassifiable, full insert sequence. [AK035904]	0.590306	0.510918	1.34567	0.349371	2.11381	3	0	0	0	0.781697	0.956084	0.605858	0.000348194	0.885284	0.885284	1.26627	1.04284	1.72792	1.09246	1.36144	1.39452
3307	DATA	7687	47	143	ref|NM_011970|ens|ENSMUST00000130737|ens|ENSMUST00000150372|ens|ENSMUST00000030642	mm|chr4:126361432-126364275	0	NA	269	CTGTACAGTTTGCAGAATATATCCAGAAAAACGTGCAACTTTATAAAATGCGGAATGGAT	7336	0	A_55_P2922574	Psmb2	NM_011970	ref|Mus musculus proteasome (prosome, macropain) subunit, beta type 2 (Psmb2), mRNA [NM_011970]	0.814024	0.0487737	1.10999	0.0889387	5.05374	3	0	0	0	1.41238	0.808589	0.926184	0.772273	0.867634	0.802166	1.08479	1.20881	1.03637	0.995111	0.966082	1.11962
3308	DATA	7691	47	147	ref|NM_001163144|ref|NM_001190483|ens|ENSMUST00000050715|ens|ENSMUST00000025618	mm|chr19:17639236-17638365	0	NA	2959	ACCACTCTTCAGAGGGTGGCTACAAATCCTGCAAGAGATGTGATAACAGCTGTTTGACAT	7343	0	A_52_P544043	Pcsk5	NM_001163144	ref|Mus musculus proprotein convertase subtilisin/kexin type 5 (Pcsk5), transcript variant 2, mRNA [NM_001163144]	1.18149	0.131567	0.853232	0.0637757	3.88863	2	0	0	0	0.461985	1.03125	2.39262	1.08378	1.1296	1.33109	0.899497	0.780481	0.879717	0.466679	0.926876	0.616428
3312	DATA	7699	47	155	ref|NM_134158|ens|ENSMUST00000141188|ens|ENSMUST00000092464|ref|XM_006532176	mm|chr11:114858178-114858119	0	NA	1043	TCCCTAAACACAGCTCCTCTGGTGGCTGAGGACAGCCAGTAAATACATATTTCTTGAGAA	7355	0	A_51_P484020	AF251705	NM_134158	ref|Mus musculus cDNA sequence AF251705 (AF251705), mRNA [NM_134158]	1.5629	0.499375	0.805408	0.128691	2.54418	2	0	0	0	0.237482	0.550395	0.721804	1.40855	1.15892	2.12122	0.938472	0.796165	0.681587	0.961387	1.13119	1.29282
3313	DATA	7702	47	158	ref|NM_007924|ens|ENSMUST00000093454|gb|U80227|gb|AK159027	mm|chr8:73116563-73116622	0	NA	2890	CGCCTTTGAACTGTGCTGTGGAGAAAGTCTACTTTGAGCCATGGAGTTGGTGTTTACAAA	7359	0	A_51_P292943	Ell	NM_007924	ref|Mus musculus elongation factor RNA polymerase II (Ell), mRNA [NM_007924]	1.15234	0.0717832	0.912007	0.112059	3.12801	3	0	0	0	0.466593	1.1581	1.19981	1.22736	1.14537	1.0843	0.802603	0.906875	1.02654	0.982302	1.01225	0.987889
3323	DATA	7726	48	18	ref|NM_001013374|ens|ENSMUST00000134594|ens|ENSMUST00000001171|ref|XM_006495853	mm|chr1:36480178-36480119	0	NA	2077	TACACTGCCTTATTCCACAAGGGCCACATGCTGCTCACCTATCTTCTCTGTGGTTAAATT	7114	0	A_55_P1976490	Lman2l	NM_001013374	ref|Mus musculus lectin, mannose-binding 2-like (Lman2l), mRNA [NM_001013374]	1.15619	0.180286	0.937597	0.015525	2.09233	2	0	0	0	0.778477	0.79281	0.972288	1.00465	1.10834	1.35557	0.948088	0.919763	0.944941	1.10307	1.03596	1.03604
3330	DATA	7738	48	30	ref|NM_001081139|ens|ENSMUST00000122960|ens|ENSMUST00000048427|ref|XM_011240062	mm|chr3:96494868-96494927	0	NA	3964	GAAAACCTGGACCCTGGAATCAGCACAGATGAGACCAGAATTGTGGATGTAAATTAGCTC	7136	0	A_66_P136701	Ankrd35	NM_001081139	ref|Mus musculus ankyrin repeat domain 35 (Ankrd35), mRNA [NM_001081139]	1.34533	0.156912	0.745812	0.254533	3.47275	3	0	0	0	0.52951	0.472306	0.915454	1.48459	1.37609	1.17532	1.00312	0.740161	0.494151	1.29665	1.31142	1.20123
3350	DATA	7788	48	80	ref|NM_153087|ens|ENSMUST00000041676|ref|XM_006525817|ref|XM_011246891	mm|chr18:13181302-13181361	0	NA	1447	CTCAGGGCTCTCTGTCTCTTTCCTGATACAACATTTATTGTGCTATGCCTGATTTCTTTC	7225	0	A_55_P2143184	Hrh4	NM_153087	ref|Mus musculus histamine receptor H4 (Hrh4), mRNA [NM_153087]	0.63657	0.0401288	1.50359	0.675143	2.22038	2	0	0	0	0.897932	0.810371	0.822328	0.608467	0.682528	0.618716	1.16106	1.06837	2.28134	1.0331	0.908512	1.10728
3352	DATA	7795	48	87	ref|NM_011382|ens|ENSMUST00000043208|ref|XM_006515632|gb|D50416	mm|chr12:74201305-74201246	0	NA	5512	CACACTGACCTTAACTCTCTGTATGTACCCTTGTTATTCTGCATGTTAAAGCTGGAATTC	7239	0	A_55_P2041095	Six4	NM_011382	ref|Mus musculus sine oculis-related homeobox 4 (Six4), mRNA [NM_011382]	0.722656	0.205423	1.51668	0.284105	3.92278	3	0	0	0	0.85009	0.962696	0.735738	0.774266	0.897352	0.496348	1.26229	1.46449	1.82327	0.818754	0.759472	1.15524
3372	DATA	7833	48	125	ref|NM_007804|ens|ENSMUST00000168288|ens|ENSMUST00000197179|ens|ENSMUST00000086317	mm|chr5:122310506-122310447	0	NA	4831	CATGCAGATGTGGACAACAAAGTTAAGCCGTTTACGTTTATTGTTGTATCACTAGTTACC	7306	0	A_51_P180463	Cux2	NM_007804	ref|Mus musculus cut-like homeobox 2 (Cux2), mRNA [NM_007804]	1.25544	0.296958	0.66065	0.221766	2.77962	3	0	0	0	0.723395	0.539675	1.18195	1.58649	1.1673	1.01253	0.711533	0.852554	0.417865	1.26513	1.24858	1.29301
3374	DATA	7840	48	132	ens|ENSMUST00000121734|nap|NAP025480-001	mm|chr7:34352468-34352409	0	NA	265	AATACGACATGCTTGTGTTCATTGTGGATGTCAAGGCCATCAAGCACCAGATCAAAGAGG	7318	0	A_55_P2154097	ENSMUST00000121734	ENSMUST00000121734	ens|predicted gene 12770 [Source:MGI Symbol;Acc:MGI:3649644] [ENSMUST00000121734]	0.750659	0.16383	1.1963	0.0932875	4.09424	3	0	0	0	1.17704	0.986301	0.902938	0.822113	0.866625	0.563238	1.09192	1.22546	1.27153	0.988058	1.06596	1.03882
3378	Mean	7852	48	144	ref|NM_027015|ref|NM_001190258|ref|NR_033727|ens|ENSMUST00000200305	mm|chr9:114891576-114891517	0	NA	282	CACTGAAAGCCCCTGATTGAAGATGAGTGGGAACCTTCCCAATAAACACGTTTTGGATAT	7339	0	A_55_P2155438	Rps27	NM_027015	ref|Mus musculus ribosomal protein S27 (Rps27), transcript variant 1, mRNA [NM_027015]	0.954398	0.0338008	1.08291	0.073763	2.74327	2	0	0	0	1.02196	1.00642	0.982481	0.932011	0.993279	0.937904	1.14661	1.10002	1.00209	0.980265	0.997942	0.899014
3380	DATA	7856	48	148	ref|NM_146169|ref|XM_006505971|gb|AK173114|gb|AK159287	mm|chr6:83756067-83756047	0	NA	3239	CCAAAGTCACAAGACCTAATGATTGCTTCATTAAGATTTGTAAGGTTAACCATGGCTTAA	7345	0	A_55_P2848588	Paip2b	NM_146169	ref|Mus musculus poly(A) binding protein interacting protein 2B (Paip2b), mRNA [NM_146169]	0.818755	0.133784	1.03662	0.0283054	2.75957	2	0	0	0	1.17069	0.756802	1.04026	0.875996	0.914395	0.665873	1.03127	1.06723	1.01138	1.1108	1.10319	1.25213
3382	DATA	7858	48	150	ens|ENSMUST00000126777|ref|XM_011251241|gb|AK003287|tc|TC1595660	mm|chr4:129297779-129297720	0	NA	57	GAGCATCCAGGTTTGTTCTGGGTCCCCTGACATAAACCTTTTCTCTGTGTTGACAGCTGG	7348	0	A_55_P2160081	Ccdc28b	ENSMUST00000126777	ens|coiled coil domain containing 28B [Source:MGI Symbol;Acc:MGI:1913514] [ENSMUST00000126777]	0.93069	0.0433547	1.08869	0.119403	2.15428	2	0	0	0	0.834435	0.811159	0.872393	0.887946	0.974631	0.929494	1.22598	1.03097	1.00911	1.16921	1.13179	1.12288
3388	DATA	7878	49	6	ref|NM_028194|ens|ENSMUST00000094700|ens|ENSMUST00000156661|ens|ENSMUST00000146953	mm|chr5:73412662-73412603	0	NA	10237	TTATGTGTGTGTGAGTTGGAGTGTGTGTGTATGTGTGTGACAGTCCTATTTTCAAGGTGT	7382	0	A_55_P2289800	Fryl	NM_028194	ref|Mus musculus furry homolog-like (Drosophila) (Fryl), mRNA [NM_028194]	0.775927	0.135818	1.35161	0.507339	1.89851	2	0	0	0	0.799657	1.00459	1.06313	0.638414	0.779384	0.909984	1.19213	0.943169	1.91952	0.882553	0.933669	0.933802
3391	DATA	7888	49	16	ref|NM_001277903|ref|NM_011618|ref|NM_001277904|ens|ENSMUST00000178163	mm|chr7:4456324-4456265	0	NA	877	CAGGAGCCACTGGAGCGTGTCCCATCTGTAACTCAAAATAAAGTGCCCCCAGGCATCTGC	7396	0	A_55_P2088385	Tnnt1	NM_001277903	ref|Mus musculus troponin T1, skeletal, slow (Tnnt1), transcript variant 1, mRNA [NM_001277903]	1.13371	0.0320194	0.80565	0.0854455	6.22714	2	0	0	0	0.588119	0.750394	1.02395	1.15449	1.1498	1.09683	0.903248	0.769378	0.744324	1.28901	1.20511	1.32534
3394	DATA	7897	49	25	ref|NM_025954|ens|ENSMUST00000053024|gb|AK010094|gb|AK005906	mm|chr17:24608406-24608465	0	NA	896	AGGATGTGAAGAGCAATCAGGAAAGTGACTGCATGTTCAAGAAGAAAATGGTCCCTGACT	7412	0	A_51_P466964	Pgp	NM_025954	ref|Mus musculus phosphoglycolate phosphatase (Pgp), mRNA [NM_025954]	1.28039	0.0162596	0.905414	0.332461	1.95123	2	0	0	0	1.11073	0.730546	0.568516	1.27652	1.26642	1.29824	1.10956	1.0849	0.521785	1.00929	0.951988	1.07151
3397	DATA	7902	49	30	ref|NM_008210|ref|NM_001081019|ens|ENSMUST00000077016|ens|ENSMUST00000119459	mm|chr1:182733267-182733208	0	NA	507	GTAACAATTATGCCAAAAGATAACCAGCTAGCACGCCACATACGCGGAGAACGTGCTTAA	7421	0	A_55_P2078266	H3f3a	NM_008210	ref|Mus musculus H3 histone, family 3A (H3f3a), mRNA [NM_008210]	0.959251	0.0411471	1.09179	0.0691408	2.85319	3	0	0	0	1.12533	0.831298	0.860491	0.912421	0.989614	0.975719	1.15228	1.10667	1.01642	1.06091	0.90414	1.0647
3401	DATA	7911	49	39	ref|NM_008421|ens|ENSMUST00000025202|gb|AK082119|gb|AK147476	mm|chr7:53688622-53688681	0	NA	7686	GCCTTGCCGTCTTGTACGACAGACTTTTTTAAGTTCCAAAATTATGATGGGAAATTTTTT	7438	0	A_55_P2007243	Kcnc1	NM_008421	ref|Mus musculus potassium voltage gated channel, Shaw-related subfamily, member 1 (Kcnc1), transcript variant 2, mRNA [NM_008421]	1.26296	0.484175	0.537309	0.479673	1.84413	3	0	0	0	0.948294	0.715573	1.62806	0.983361	0.983484	1.82204	0.000294273	0.923281	0.688353	1.17268	1.16409	0.970487
3411	DATA	7937	49	65	ens|ENSMUST00000120286|tc|TC1683430	mm|chrX:72655049-72654990	0	NA	202	GGTCATTCTACTTGCCTCAAGAAAATTCCATATAGATAGGCTACAAAGTCTTTATGACTA	7483	0	A_55_P1991750	Mtcp1	ENSMUST00000120286	ens|mature T cell proliferation 1 [Source:MGI Symbol;Acc:MGI:102699] [ENSMUST00000120286]	1.09418	0.194239	0.703548	0.211228	2.3578	3	0	0	0	1.07856	0.674117	1.31558	1.3035	1.05928	0.919758	0.470999	0.883524	0.756122	1.19605	1.26731	1.07519
3416	DATA	7954	49	82	ref|XM_006511302|gb|AK162584|gb|AK142088|tc|TC1629740	mm|chr9:62726234-62726175	0	NA	5958	GTTGAATGTTACCTGTTTCTGTAGAGCTCTTTAGATGTAATAAAAGAGAAGCCTTCAGTT	7514	0	A_55_P2724594	Pias1	XM_006511302	ref|PREDICTED: Mus musculus protein inhibitor of activated STAT 1 (Pias1), transcript variant X1, mRNA [XM_006511302]	0.697247	0.179872	1.49757	0.692951	1.93626	2	0	0	0	0.882825	0.899234	0.982102	0.739152	0.852468	0.500122	0.988574	1.21739	2.28674	0.912362	0.939346	0.799684
3417	DATA	7955	49	83	ref|NM_024444|ens|ENSMUST00000003574|ens|ENSMUST00000141975|ref|XM_006509748	mm|chr8:74512440-74512381	0	NA	1642	ACTCTCCTATCCATCCACCCACCTGTGCCTTTCCAGGAATAAAATTTTCTTGTCACCTTG	7516	0	A_55_P2083411	Cyp4f18	NM_024444	ref|Mus musculus cytochrome P450, family 4, subfamily f, polypeptide 18 (Cyp4f18), mRNA [NM_024444]	0.780383	0.100395	1.34736	0.247546	3.67624	2	0	0	0	0.863759	0.735481	0.883337	0.879538	0.782818	0.678793	1.48499	1.06158	1.49551	1.05223	0.888012	1.19395
3424	DATA	7977	49	105	ref|NM_023336|ref|NM_001113573|ref|NM_001113574|ens|ENSMUST00000154316	mm|chr2:27315111-27315052	0	NA	1300	ATCCTCCGGGAGATGCTGTCCAAGAAGCATGCTGCCTATGCGTGGCCCTTTTACAAGCCA	7558	0	A_55_P2732394	Brd3	NM_023336	ref|Mus musculus bromodomain containing 3 (Brd3), transcript variant 3, mRNA [NM_023336]	1.15938	0.107277	0.880525	0.0171935	4.44549	2	0	0	0	0.871115	0.988736	1.16137	1.11902	1.07813	1.28098	0.897535	0.863153	0.880887	0.949649	0.909478	0.999955
3433	DATA	8003	49	131	ref|NM_024475|ens|ENSMUST00000129054|ens|ENSMUST00000151875|ens|ENSMUST00000102795	mm|chr11:44268154-44268095	0	NA	2056	GCTCCTTTTAAATGAACAGGTGTACATTGTTCTTATGGGACTATTTCAGTGGTGTAAATA	7603	0	A_55_P1979090	Ublcp1	NM_024475	ref|Mus musculus ubiquitin-like domain containing CTD phosphatase 1 (Ublcp1), mRNA [NM_024475]	0.861807	0.0416438	1.14371	0.092005	4.83478	2	0	0	0	1.02524	0.939094	0.952323	0.860371	0.904151	0.820901	1.0697	1.1147	1.24672	0.981871	1.0754	1.00952
3435	DATA	8005	49	133	ref|NM_021549|ref|NM_001290764|ref|NM_001290766|ref|NM_001290767	mm|chr7:52117912-52117971	0	NA	1746	ATCCTTGAGATTCCATTCCGGTTACAGGAGCATCTGGACCCGGCACTGCAGCGACTGTAC	7606	0	A_55_P1965150	Pnkp	NM_021549	ref|Mus musculus polynucleotide kinase 3'- phosphatase (Pnkp), transcript variant 1, mRNA [NM_021549]	1.05395	0.0250258	0.958676	0.0236535	4.79226	3	0	0	0	1.02887	0.936904	1.03619	1.03697	1.04219	1.08269	0.976878	0.93194	0.967211	1.0226	0.940562	0.996995
3436	DATA	8010	49	138	ens|ENSMUST00000075452|gb|AK015681|gb|AK088891|tc|TC1622521	mm|chr5:75401997-75401938	0	NA	1714	GAAGTAGAGCATTGTTCTTAAAGTTAAAGGTAAAACGTGCCCGATCTAACATAATTGTAG	7615	0	A_52_P574291	Chic2	ENSMUST00000075452	ens|cysteine-rich hydrophobic domain 2 [Source:MGI Symbol;Acc:MGI:1921527] [ENSMUST00000075452]	0.72338	0.11787	1.3016	0.110312	6.20372	3	0	0	0	0.937875	1.08697	0.829956	0.831011	0.741711	0.597418	1.17737	1.38807	1.33937	1.09234	1.02223	0.955677
3438	DATA	8016	49	144	ref|NM_001286028|ref|NM_001286013|ens|ENSMUST00000166280|ens|ENSMUST00000061722	mm|chr17:46440042-46440101	0	NA	1236	CTGTGATGGGAGGAGCCTTTCTAGCTACCTTCCTGCCCTCCTTCACACCTCAGACTGTCA	7625	0	A_51_P254299	Dlk2	NM_001286028	ref|Mus musculus delta-like 2 homolog (Drosophila) (Dlk2), transcript variant 2, mRNA [NM_001286028]	0.946763	0.0903322	1.18222	0.131983	2.54988	3	0	0	0	1.10448	0.999936	0.705973	0.846396	0.972353	1.02154	1.33402	1.11798	1.09464	0.935897	0.942841	0.923937
3442	DATA	8023	49	151	ens|ENSMUST00000116054|nap|NAP059628-1	mm|chr13:21472857-21472798	0	NA	142	AGGACAACAAAAAAGGCCTGAAGAAGATGCAGGTTAACAATGCAAAGGCAATGAGTGCAT	7638	0	A_66_P135638	ENSMUST00000116054	ENSMUST00000116054	ens|predicted gene 11271 [Source:MGI Symbol;Acc:MGI:3652214] [ENSMUST00000116054]	0.824026	0.173293	1.28745	0.0667595	4.32222	2	0	0	0	0.313046	1.17951	0.794871	0.843677	0.986655	0.641745	1.32959	1.32228	1.21047	1.13393	1.03675	1.20746
3458	DATA	8071	50	35	ref|NM_008749|ref|NM_001163662|ens|ENSMUST00000033096|ref|XM_006540696	mm|chr7:52748644-52748585	0	NA	2026	GTACCCAGATATGGCTACACCCCTAGCTGAGGTCCAACCCTGCTCAGGGCTCCTGAAAAT	7432	0	A_51_P433733	Nucb1	NM_008749	ref|Mus musculus nucleobindin 1 (Nucb1), transcript variant 2, mRNA [NM_008749]	0.91991	0.0192373	1.02518	0.0748305	2.35982	2	0	0	0	1.04135	1.21733	1.17323	0.901533	0.918293	0.939905	1.01312	1.1053	0.957107	0.918073	0.874848	0.939905
3470	DATA	8103	50	67	ref|NM_023739|ens|ENSMUST00000136717|ens|ENSMUST00000098143|gb|AK007054	mm|chr4:40972103-40972162	0	NA	3633	TGGATTTTTAATCATGTGTTTGAAGAGGCTCCTCACATATCACTGTGATTACTAAGAGAT	7488	0	A_52_P408008	Nfx1	NM_023739	ref|Mus musculus nuclear transcription factor, X-box binding 1 (Nfx1), transcript variant 1, mRNA [NM_023739]	1.11361	0.145319	0.784578	0.184502	2.4266	3	0	0	0	0.888882	1.00088	0.906276	1.28072	1.01687	1.04325	0.625082	0.986644	0.742006	1.07948	1.22924	1.20068
3476	DATA	8120	50	84	ref|NM_177214|ens|ENSMUST00000131435|ens|ENSMUST00000103220|gb|BC011390	mm|chr2:127064236-127064295	0	NA	6021	GGAGTGGAGAGTGTTTTTGACATCATGGAGATGGAGGATGAAGAACGGAATCCATTGCTT	7519	0	A_51_P292877	Snrnp200	NM_177214	ref|Mus musculus small nuclear ribonucleoprotein 200 (U5) (Snrnp200), mRNA [NM_177214]	0.805684	0.250229	1.22465	0.128475	2.57983	2	0	0	0	1.14731	1.06685	0.849696	0.884718	1.00685	0.525482	1.09397	1.22918	1.3508	0.929715	0.958014	0.957423
3482	DATA	8133	50	97	ref|NM_027797|ref|NM_001141950|ens|ENSMUST00000133012|ens|ENSMUST00000026578	mm|chr7:148522504-148522563	0	NA	1317	TCCCCATCAGGCCAGCCCTGAAATGAAACTGCTTGGTTTCCAAAAGGAAACAAAAGCAAA	7544	0	A_55_P2731646	Tmem80	NM_027797	ref|Mus musculus transmembrane protein 80 (Tmem80), transcript variant 1, mRNA [NM_027797]	1.07348	0.148405	0.829861	0.235101	1.51769	3	0	0	0	1.07846	1.14614	1.19667	0.989441	0.986157	1.24483	0.946755	0.983604	0.559224	0.94566	1.05292	0.870139
3484	DATA	8138	50	102	ref|NM_144522|ens|ENSMUST00000120705|gb|AK047320|gb|AK047327	mm|chr7:134341354-134341295	0	NA	3232	TGGCGCTTTGAGGAACCGGAAAATGAACCTGCTGTTATATCTGTCTCCAGCCTTGTTATT	7554	0	A_51_P233947	Tbc1d10b	NM_144522	ref|Mus musculus TBC1 domain family, member 10b (Tbc1d10b), mRNA [NM_144522]	1.19932	0.189459	0.799189	0.236137	2.28919	3	0	0	0	1.05944	0.933906	0.773473	1.03912	1.1504	1.40844	0.883876	0.981304	0.532386	1.0199	1.13479	1.08297
3491	DATA	8154	50	118	gb|CF532098|tc|TC1652002	mm|chr5:114059554-114059495	0	NA	349	ACAAGAGGGATGTCCACACCCTCCTGAGAGTCAGTTTAAAATATCAGCTTAGATACCTGG	7582	0	A_55_P2289040	AI429363	CF532098	gb|UI-M-FY0-cgr-m-18-0-UI.r1 NIH_BMAP_FY0 Mus musculus cDNA clone IMAGE:30363281 5', mRNA sequence [CF532098]	1.30882	0.241474	0.819226	0.0940356	3.27236	2	0	0	0	0.774915	0.803161	1.2868	1.52274	1.04698	1.35673	0.888737	0.712229	0.856712	1.01747	0.734437	0.999094
3492	DATA	8156	50	120	ref|NM_001039710|ref|NM_026424|ens|ENSMUST00000178708|ens|ENSMUST00000087617	mm|chr1:55121039-55121098	0	NA	385	AAATGCATGACGTAGTATCAGGAATGGAGGACTATCAGCATTTCGTTCCTTGGTGTAAAA	7586	0	A_51_P255764	Coq10b	NM_001039710	ref|Mus musculus coenzyme Q10 homolog B (S. cerevisiae) (Coq10b), transcript variant 1, mRNA [NM_001039710]	1.25101	0.101836	0.746599	0.26692	3.05812	2	0	0	0	0.917001	0.797655	1.27978	1.36669	1.21143	1.1749	0.683788	1.03932	0.516686	0.893904	1.05824	1.06059
3495	DATA	8164	50	128	ref|NM_001033320|ens|ENSMUST00000062574|ref|XM_011248358|ref|XM_006530898	mm|chr8:108220796-108220981	0	NA	1995	TGGTGACATTATGGACAGTTCCACAGAGACCCCTCCCATCTCAATCAAGTCCCGTACCCA	7599	0	A_55_P2745225	Rltpr	NM_001033320	ref|Mus musculus RGD motif, leucine rich repeats, tropomodulin domain and proline-rich containing (Rltpr), mRNA [NM_001033320]	0.829285	0.152973	1.31762	0.10559	4.55049	3	0	0	0	0.72924	0.887499	0.818978	0.701199	0.787988	0.998667	1.37859	1.1957	1.37859	1.11481	0.893967	1.11478
3499	DATA	8175	50	139	ref|NM_016784|ens|ENSMUST00000135813|ens|ENSMUST00000029628|ens|ENSMUST00000150268	mm|chr3:82872982-82873669	0	NA	1142	TACAGGAAGTCACGATACCACAATACGATTATGGGATCTAGTGGCTGGAAAGACACGAGT	7618	0	A_52_P214804	Plrg1	NM_016784	ref|Mus musculus pleiotropic regulator 1, PRL1 homolog (Arabidopsis) (Plrg1), mRNA [NM_016784]	0.892963	0.0833661	1.16102	0.129425	3.01586	3	0	0	0	1.20921	0.961713	0.934016	0.816356	0.880784	0.981749	1.27561	1.18682	1.02064	0.92557	0.762142	1.04539
3504	DATA	8185	50	149	ref|NM_011642|ref|NM_001126330|ref|NM_001126331|ens|ENSMUST00000097762	mm|chr4:153433102-153433043	0	NA	2301	TGAGGAACGTACCTTCTTCTCCTGTCCTTCCTCTGTGAGAAACTGCTCTTGGAAGTGGGA	7635	0	A_52_P410636	Trp73	NM_011642	ref|Mus musculus transformation related protein 73 (Trp73), transcript variant 1, mRNA [NM_011642]	0.909887	0.0747946	1.34591	0.221607	3.22896	2	0	0	0	0.969329	0.575319	0.646468	0.859861	0.873931	0.99587	1.57988	1.13918	1.31868	1.02476	1.01159	1.00514
3507	DATA	8201	51	1	ref|NM_023190|ref|NM_001085473|ens|ENSMUST00000132242|ens|ENSMUST00000134808	mm|chr14:55303878-55298161	0	NA	498	ACCCCATGCTGCATTCCAGCCAAATTCACAGATCGGGGAGGAAATGAGCCAGAACAGCTT	7661	0	A_52_P367675	Acin1	NM_023190	ref|Mus musculus apoptotic chromatin condensation inducer 1 (Acin1), transcript variant 2, mRNA [NM_023190]	1.2464	0.216926	0.73975	0.229855	2.77656	3	0	0	0	0.940212	0.982051	1.44373	1.4941	1.15481	1.09029	0.616456	0.597848	1.00495	0.946249	0.940837	0.788471
3509	DATA	8205	51	5	ref|NM_181858|ens|ENSMUST00000111132|ens|ENSMUST00000129749|ens|ENSMUST00000111131	mm|chr2:103921156-103921215	0	NA	160	GTTAGCCTCAAATGCTACAACTGTTTAGACCCGGTTTCTTCATGCAAAATAAACACTACT	7669	0	A_52_P61691	Cd59b	NM_181858	ref|Mus musculus CD59b antigen (Cd59b), mRNA [NM_181858]	0.815851	0.113402	1.29613	0.18398	3.84905	3	0	0	0	0.775146	0.542864	0.987112	0.800728	0.936055	0.710769	1.47482	1.10728	1.30628	1.19109	0.991882	1.17597
3517	DATA	8224	51	24	ref|NM_001163510|ref|NM_008433|ens|ENSMUST00000171904|ref|XM_006539563	mm|chr7:25170161-25170220	0	NA	1966	GCCAGAAGAGGGTACAGGGTGCTGCTCACCAATCCACCCTCATACTTTGTAATAAATGGT	7706	0	A_55_P2802751	Kcnn4	NM_001163510	ref|Mus musculus potassium intermediate/small conductance calcium-activated channel, subfamily N, member 4 (Kcnn4), transcript variant 2, mRNA [NM_001163510]	0.889609	0.11327	1.18695	0.0632664	3.96956	3	0	0	0	1.33127	0.813303	0.769394	0.855814	0.797082	1.01593	1.25995	1.14794	1.15297	0.688847	1.16821	0.999289
3526	DATA	8250	51	50	ref|NM_023547|ens|ENSMUST00000032109|ens|ENSMUST00000113935|gb|AK010946	mm|chr6:83074744-83074685	0	NA	46	GTGCCCACGGCCACGGAGTACACAAGAAAAAACACAAGAAACATAAAAAGAAACACAAGA	7751	0	A_55_P1957593	Ino80b	NM_023547	ref|Mus musculus INO80 complex subunit B (Ino80b), mRNA [NM_023547]	1.16394	0.107648	0.733074	0.321728	2.19973	2	0	0	0	0.885219	1.14844	1.07308	1.28795	1.1092	1.09466	1.02642	0.783816	0.388991	1.13269	1.23969	0.829843
3533	DATA	8277	51	77	ref|NM_175035|ens|ENSMUST00000055558|ref|XM_006506228|ref|XM_006506230	mm|chr6:48703501-48703560	0	NA	1244	ATTAATTTCACTCTCATTTGATTCCCATGGATCAGACATGCCAGGGAATCTTCTTTTAAA	7798	0	A_51_P176365	Gimap5	NM_175035	ref|Mus musculus GTPase, IMAP family member 5 (Gimap5), mRNA [NM_175035]	1.17683	0.119578	0.889048	0.0717678	3.57409	3	0	0	0	0.906228	0.77448	1.43712	1.07512	1.1468	1.30856	0.881629	0.821277	0.964237	0.922013	0.975392	0.787141
3535	DATA	8282	51	82	ens|ENSMUST00000126262|tc|TC1649763	mm|chr5:117832237-117832178	0	NA	743	AGTGCCCTTCTCCTCCTCAATGGCTGTCCGGAGCTTCCCCGTTCACAGTCTAAGCGGACT	7808	0	A_66_P133203	Rfc5	ENSMUST00000126262	ens|replication factor C (activator 1) 5 [Source:MGI Symbol;Acc:MGI:1919401] [ENSMUST00000126262]	0.749567	0.0674428	1.45059	0.454398	2.64318	2	0	0	0	0.777964	0.78765	0.917751	0.678242	0.758152	0.812306	1.36309	1.04631	1.94238	1.02122	0.848518	1.04642
3536	DATA	8283	51	83	ref|NM_008823|ens|ENSMUST00000001156|gb|BC132369|gb|BC138306	mm|chrX:20502801-20502742	0	NA	1383	GGGGCAGAAGCTGGTGGTGGAAGAGAAACGGTCATGTCTACATGTGCCTGTCTGCAAAGA	7810	0	A_51_P408363	Cfp	NM_008823	ref|Mus musculus complement factor properdin (Cfp), mRNA [NM_008823]	1.15127	0.297044	0.802164	0.0749642	1.97377	2	0	0	0	0.908178	0.767716	1.02583	1.47673	1.08232	0.894769	0.749974	0.768452	0.888065	1.13056	1.17013	1.13727
3537	DATA	8284	51	84	ref|NM_176829|ens|ENSMUST00000104962|gb|BC139107|gb|BC139123	mm|chr11:29723121-29723062	0	NA	2547	GTTTCTGTTTGTTGGACTTAGTAATGACTGAGTTGGGAGTTGTCAGTACTTTGCAGTGGC	7812	0	A_52_P611114	4931440F15Rik	NM_176829	ref|Mus musculus RIKEN cDNA 4931440F15 gene (4931440F15Rik), mRNA [NM_176829]	0.650432	0.0875482	1.50362	0.410915	3.51733	2	0	0	0	1.08781	0.938127	0.745899	0.588107	0.750525	0.612664	1.16194	1.38934	1.95958	0.866227	0.83299	1.06679
3540	DATA	8294	51	94	ref|NM_026794|ens|ENSMUST00000035113|gb|AK003863|gb|BC027548	mm|chr9:121621954-121622013	0	NA	431	TGCGAGGACCTGAGGTGTATGACAGCGGTGTCATTGTCAACAATAGTGATTATCTGATGA	7829	0	A_51_P119715	Deb1	NM_026794	ref|Mus musculus differentially expressed in B16F10 1 (Deb1), mRNA [NM_026794]	1.13013	0.0683042	0.877336	0.211414	1.97076	2	0	0	0	0.847773	0.924501	1.10364	1.05128	1.1679	1.17121	1.0212	0.976205	0.634603	1.03456	1.08201	0.985114
3543	DATA	8304	51	104	ens|ENSMUST00000160470|gb|AK033434|tc|TC1605929|riken|9030203C12	mm|chr10:61115509-61115568	0	NA	1372	GCCTTGGCTAGAAATAGACTCATAGGGCTGGTGCAATGGGTCAAAAAACCAAACAAAACC	7848	0	A_55_P2715266	Ppa1	ENSMUST00000160470	ens|pyrophosphatase (inorganic) 1 [Source:MGI Symbol;Acc:MGI:97831] [ENSMUST00000160470]	1.36497	0.19395	0.34821	0.428702	3.74271	2	0	0	0	0.952338	0.817965	2.27102	1.153	1.40833	1.53356	0.000238532	0.827109	0.217283	1.01694	1.03135	0.770855
3544	DATA	8305	51	105	ref|NM_023668|ens|ENSMUST00000018880|ref|XM_006534540|gb|AK146029	mm|chr11:68635097-68635038	0	NA	2216	TTATTTATTCAGACTCATATGGCATGTTAATTAATGACTTACGATGGTGTCCTACTCTGG	7850	0	A_51_P350073	Ndel1	NM_023668	ref|Mus musculus nuclear distribution gene E-like homolog 1 (A. nidulans) (Ndel1), mRNA [NM_023668]	1.14516	0.160527	0.922305	0.0494084	2.29812	2	0	0	0	0.871469	0.990228	0.948577	0.995781	1.12479	1.31489	0.866343	0.959897	0.940674	0.947936	1.03038	1.00902
3547	DATA	8313	51	113	ref|NM_172522|ens|ENSMUST00000093829|gb|BC151157|gb|BC172024	mm|chr9:64548369-64548428	0	NA	3238	GGCACAAGAAATGCAAATGATACCCAGTGTTAATACTGTATGGCCCTCACCCTCAAGAGA	7865	0	A_51_P487178	Megf11	NM_172522	ref|Mus musculus multiple EGF-like-domains 11 (Megf11), transcript variant 2, mRNA [NM_172522]	0.690883	0.151522	1.52558	0.957669	1.4911	2	0	0	0	0.794601	1.09066	1.0709	0.521446	0.813383	0.73782	1.02292	0.923904	2.62992	0.912396	0.648144	0.833902
3554	DATA	8355	51	155	ref|NM_153170|ens|ENSMUST00000039305|ref|XM_006533324|ref|XM_006533325	mm|chr11:54972193-54972134	0	NA	2207	GCAATGAACATCTTCTGTTACCTGTCGGGCACCAAGCATAATACAGGGCTCTTATATAAT	7941	0	A_51_P366672	Slc36a2	NM_153170	ref|Mus musculus solute carrier family 36 (proton/amino acid symporter), member 2 (Slc36a2), mRNA [NM_153170]	1.18359	0.074788	0.831396	0.0859673	5.35362	3	0	0	0	0.293596	0.642767	0.925345	1.2285	1.09726	1.22502	0.80909	0.926318	0.75878	1.41678	1.43023	1.24632
3566	DATA	8382	52	18	gb|AK040105|tc|TC1628536|riken|A430061O12	mm|chr4:136892439-136892380	0	NA	3573	AACTATACTTCATATACCACACGAGACTCTTTTTATAGCACCTTCCTTGCCCAAGGCAGG	7696	0	A_55_P2410626	A430061O12Rik	AK040105	gb|Mus musculus 0 day neonate thymus cDNA, RIKEN full-length enriched library, clone:A430061O12 product:unclassifiable, full insert sequence. [AK040105]	1.07325	0.232577	0.520644	0.285235	2.60065	3	0	0	0	1.17265	1.18284	1.55783	1.31073	1.0631	0.845912	0.203128	0.755207	0.603599	0.938723	1.31989	1.0464
3567	DATA	8384	52	20	ref|NM_001077363|ref|NM_008956|ref|NM_001283013|ens|ENSMUST00000172282	mm|chr10:79326905-79326963	0	NA	2832	GTGGAAGAGTGTAAATATTTATGATTTTATACCTGTGGGGCTGAGGCGGGTGCAGCAGTT	7700	0	A_51_P462692	Ptbp1	NM_001077363	ref|Mus musculus polypyrimidine tract binding protein 1 (Ptbp1), transcript variant 1, mRNA [NM_001077363]	1.08208	0.132687	0.827258	0.122381	2.44514	3	0	0	0	0.927168	1.1668	1.4404	1.22475	0.962367	1.05913	0.856462	0.932394	0.692917	0.96206	0.925323	0.850237
3571	DATA	8397	52	33	gb|AK142273|tc|TC1645847|riken|D330027A05	mm|chr10:72124449-72124508	0	NA	3599	CTCAGGGATAATGACTAAAGCAGTCGCATGTCTCTTGCATTCCTAGATGGTGGTAGTTAG	7723	0	A_55_P2281624	2610034E01Rik	AK142273	gb|Mus musculus 13 days embryo heart cDNA, RIKEN full-length enriched library, clone:D330027A05 product:unclassifiable, full insert sequence. [AK142273]	1.18453	0.124599	0.610813	0.52991	1.82547	2	0	0	0	0.874261	1.03165	1.40752	1.32777	1.10121	1.12462	0.000132816	0.949413	0.882894	1.08655	1.35826	0.855722
3586	DATA	8445	52	81	ens|ENSMUST00000119629|nap|NAP112641-1|nap|NAP111127-1	mm|chr11:6686284-6686225	0	NA	299	AGAAGAAAGCTGCTGGAAAAGGGGACGTCTCAACAGAGACCACCTGTCCTCCGAGCAGGA	7807	0	A_52_P324344	ENSMUST00000119629	ENSMUST00000119629	ens|predicted gene 11979 [Source:MGI Symbol;Acc:MGI:3650694] [ENSMUST00000119629]	0.884621	0.254226	1.15848	0.0632765	1.81056	2	0	0	0	1.2654	1.26484	0.720764	0.96494	1.08899	0.599937	1.14947	1.10019	1.22578	0.901936	0.798329	0.919437
3588	DATA	8448	52	84	ref|NM_178869|ens|ENSMUST00000109480|ens|ENSMUST00000016897|ref|XM_011245659	mm|chr15:83314328-83314269	0	NA	1944	TTATTATTTTTGAGATAGGTACCTCTGGATGCCCTGGAACTTCCCATGTAGACCAGGCTG	7813	0	A_55_P2846188	Ttll1	NM_178869	ref|Mus musculus tubulin tyrosine ligase-like 1 (Ttll1), mRNA [NM_178869]	0.820091	0.244042	1.32449	0.0645249	3.46098	2	0	0	0	0.800694	0.772024	0.688838	0.847683	1.04916	0.563426	1.39849	1.27999	1.29499	1.2303	1.05269	1.0217
3599	DATA	8478	52	114	ref|NM_177069|ens|ENSMUST00000054925|gb|AK087710|gb|BC099397	mm|chr9:109042099-109042040	0	NA	1354	ATGTAAGCATAATTCAAGTGATAACAATTCGAACCACCCCCTGCTTTCTGATGGCATTTA	7867	0	A_52_P457529	Fbxw21	NM_177069	ref|Mus musculus F-box and WD-40 domain protein 21 (Fbxw21), mRNA [NM_177069]	0.890648	0.149251	1.51815	0.429021	2.39269	2	0	0	0	0.536255	0.504022	0.793355	0.735591	1.03332	0.903032	1.54896	1.07455	1.93093	1.09948	0.786824	1.05368
3611	DATA	8498	52	134	ref|NR_034048|ens|ENSMUST00000148085|gb|AF357409	mm|chr16:23110887-23110946	0	NA	44	TGTAATAATGCTAGCAGAGTACACACAAGAAGAAAAGTAACTGCACTGGATTGCAAAGAC	7903	0	A_55_P2509793	Snora81	NR_034048	ref|Mus musculus small nucleolar RNA, H/ACA box 81 (Snora81), small nucleolar RNA [NR_034048]	0.616036	0.205381	1.39549	0.265757	4.01959	3	0	0	0	0.692184	0.797153	0.741373	0.704257	0.762568	0.381284	1.69068	1.17527	1.32052	1.42707	1.2842	1.02343
3619	DATA	8520	52	156	ref|NM_019811|ens|ENSMUST00000029135|ref|XM_006499973|ref|XM_006499974	mm|chr2:155388385-155388444	0	NA	2738	CCATGAGAGGCACTTGTAGGTGAAACTCTCTTTTCTTGTTCTTTTTGTGCTCAAGACCCA	7944	0	A_66_P108725	Acss2	NM_019811	ref|Mus musculus acyl-CoA synthetase short-chain family member 2 (Acss2), mRNA [NM_019811]	1.22071	0.166308	0.967482	0.0748066	2.4052	2	0	0	0	0.254456	0.739434	0.924934	1.07901	1.17932	1.40381	1.05223	0.939571	0.910643	1.20083	1.19278	1.12299
3625	DATA	8527	52	163	ref|NM_010282|ref|XM_011244279|ref|XM_011244278|ref|XM_011244280	mm|chr13:14144769-14144710	0	NA	2313	TACTCAGCTATATATAAGTTTGTGACCAGTCTGAACTACAGGGGACATTGCATCAAAAAA	7957	0	A_55_P2170569	Ggps1	NM_010282	ref|Mus musculus geranylgeranyl diphosphate synthase 1 (Ggps1), mRNA [NM_010282]	1.13877	0.130567	0.92596	0.0156865	2.80289	2	0	0	0	0.481142	1.08124	1.10673	0.991743	1.18338	1.24118	0.93476	0.907849	0.93527	1.13665	1.01784	0.982212
3627	DATA	8534	53	6	ref|NM_008095|ens|ENSMUST00000124342|ens|ENSMUST00000186265|ens|ENSMUST00000086046	mm|chr5:130263579-130263638	0	NA	1475	ACTAGGAACAAATTCTGAGTGTACCAATGGCTGCGAATGCTATGATTTTGTGACTTCTGG	7969	0	A_51_P228276	Gbas	NM_008095	ref|Mus musculus glioblastoma amplified sequence (Gbas), mRNA [NM_008095]	0.733024	0.16875	1.287	0.115939	4.68651	3	0	0	0	1.09787	0.564127	1.07056	0.748811	0.893326	0.556936	1.3648	1.34245	1.15375	1.03146	1.05997	1.11594
3638	DATA	8560	53	32	ref|NM_028235|ens|ENSMUST00000099996|gb|AK011097|gb|BC157929	mm|chr2:75774347-75774288	0	NA	2172	ACTATTCGATATAACCTGCACTTTTAAATCCTGTCAAGTGAGATTGTGTAAGAACCCAGG	8018	0	A_52_P96748	Ttc30b	NM_028235	ref|Mus musculus tetratricopeptide repeat domain 30B (Ttc30b), mRNA [NM_028235]	0.708288	0.350348	1.51629	0.150592	3.66994	2	0	0	0	1.19081	0.992541	0.813615	0.390767	0.649956	1.08414	1.34307	1.61603	1.58978	0.731582	0.735246	0.862469
3639	DATA	8562	53	34	ens|ENSMUST00000156549	mm|chr8:46892575-46892634	0	NA	283	GGCATCCATGGCTTGTGTTATAATACTGCATTTTACACAGAAGAATGTACAAATACCAAA	8021	0	A_55_P2721832	Sorbs2	ENSMUST00000156549	ens|sorbin and SH3 domain containing 2 [Source:MGI Symbol;Acc:MGI:1924574] [ENSMUST00000156549]	1.08552	0.0529865	0.734914	0.270559	2.20265	2	0	0	0	1.01533	1.09749	1.21217	1.14546	1.06617	1.04493	0.438455	0.968505	0.797781	1.19556	1.08769	0.930457
3641	DATA	8566	53	38	gb|AK164054|gb|AK141331|riken|C430031B22|riken|C430037N05	mm|chr8:46987757-46987816	0	NA	2268	TTCTGTGTGATCTTGGGAGGTGAGTAGCATGTCAGATAAGACTTTCATTCTTAAATGAAG	8029	0	A_55_P2737992	Pdlim3	AK164054	gb|Mus musculus 7 days embryo whole body cDNA, RIKEN full-length enriched library, clone:C430037N05 product:PDZ and LIM domain 3, full insert sequence. [AK164054]	1.45489	0.0415885	0.700274	0.21307	6.0207	2	0	0	0	1.01511	0.903054	1.07173	1.41613	1.44973	1.49883	0.455638	0.799922	0.845262	0.799217	1.0251	0.720282
3646	DATA	8574	53	46	ref|NM_175317|ref|NM_001159672|ens|ENSMUST00000039881|ens|ENSMUST00000179489	mm|chr7:89926266-89926325	0	NA	3540	CCGGGAAAATCTCACTTTGGTAAATTATCTGTGTGGATTCACTTTCAATAATAAACATGG	8045	0	A_55_P1972530	Eftud1	NM_175317	ref|Mus musculus elongation factor Tu GTP binding domain containing 1 (Eftud1), transcript variant 1, mRNA [NM_175317]	0.896717	0.0553421	1.31155	0.392235	1.81389	2	0	0	0	0.903213	0.537673	0.867456	0.912867	0.942187	0.835096	1.13778	1.03623	1.76066	1.13098	1.00619	0.929673
3652	DATA	8590	53	62	ref|NM_153570|ens|ENSMUST00000123380|ens|ENSMUST00000042147|gb|AK090024	mm|chr5:111077956-111077897	0	NA	1520	TGGAGTTCATCCCCGCTAAAGGCCTATTGGGTCGACAGGACGACCTCTGTACCCAGTTCT	8075	0	A_51_P346453	Noc4l	NM_153570	ref|Mus musculus nucleolar complex associated 4 homolog (S. cerevisiae) (Noc4l), mRNA [NM_153570]	0.881074	0.0167245	1.27615	0.359118	1.90342	2	0	0	0	0.940009	0.98621	0.919352	0.861823	0.889366	0.892031	1.05151	1.08661	1.69033	0.924017	0.887589	0.871152
3660	DATA	8610	53	82	ref|NM_134139|ens|ENSMUST00000049424|ref|XM_006526554|gb|AK077521	mm|chr19:8812462-8812679	0	NA	496	AGCCTGTATTCAGGGCCAAAAATGTGCGGAATGATTGGCTTGATCTCCGAGTTCCTATTT	8110	0	A_51_P125050	Wdr74	NM_134139	ref|Mus musculus WD repeat domain 74 (Wdr74), mRNA [NM_134139]	0.749827	0.189714	1.39929	0.112023	5.10583	3	0	0	0	0.960602	0.927125	0.699367	0.889116	0.826607	0.533758	1.37087	1.30422	1.52279	0.955107	0.955888	1.05455
3663	DATA	8616	53	88	ref|NM_172428|ens|ENSMUST00000089174|ref|XM_011245767|gb|AK028514	mm|chr15:81972571-81972630	0	NA	1983	TGTGCTGTGCCTTCATTGGTAAAATAAATTTGATGGTGTCTGAATCCTCTGACAAGCTCT	8121	0	A_55_P2057446	Ccdc134	NM_172428	ref|Mus musculus coiled-coil domain containing 134 (Ccdc134), mRNA [NM_172428]	0.787785	0.224432	1.2062	0.216882	2.32204	3	0	0	0	0.973028	0.97496	1.04488	0.952211	0.879045	0.5321	1.32718	0.955812	1.33561	1.0014	1.04461	0.979176
3669	DATA	8628	53	100	ref|NM_009931|ens|ENSMUST00000033898|ref|XR_378656|gb|AK146487	mm|chr8:11199068-11199009	0	NA	5969	TTTTCGTCTCTGGAGAAACTGTACTATCCTTTCACAGGGTTACCAACATCAGGCCACTGA	8141	0	A_51_P124254	Col4a1	NM_009931	ref|Mus musculus collagen, type IV, alpha 1 (Col4a1), mRNA [NM_009931]	1.31817	0.0908084	0.790696	0.302464	2.89299	2	0	0	0	0.794076	0.947019	0.798855	1.2203	1.3345	1.3997	0.873278	1.04329	0.455518	0.95214	1.00215	1.17916
3676	DATA	8647	53	119	ref|NM_028672|ens|ENSMUST00000173923|ens|ENSMUST00000172602|ens|ENSMUST00000058269	mm|chr11:22920165-22920224	0	NA	656	GCTCATAAACAACATGTGGAACGACTTTTCTGTTGAAGATTATATTCAGTATGACTCAGA	8174	0	A_52_P257705	Fam161a	NM_028672	ref|Mus musculus family with sequence similarity 161, member A (Fam161a), mRNA [NM_028672]	1.0786	0.0554183	0.552893	0.489215	1.84943	2	0	0	0	0.84342	1.47061	1.26192	1.14165	1.05658	1.03758	0.930863	0.727481	0.000335245	1.08591	1.18453	1.25912
3679	DATA	8656	53	128	ref|NM_001205214|ref|NM_011306|ref|NM_001205215|ref|NM_001205216	mm|chr17:34175279-34175338	0	NA	2563	TGGACCTCTTTTGGGGGTTCCCTCCCATCTTTCACTTGCACATAAAGTTGCTTTCCAGTT	8188	0	A_55_P2008609	Rxrb	NM_001205214	ref|Mus musculus retinoid X receptor beta (Rxrb), transcript variant 1, mRNA [NM_001205214]	1.10401	0.061803	0.933133	0.0465073	3.82653	3	0	0	0	0.973678	0.914286	1.04897	1.13056	1.03337	1.14811	0.922985	0.892538	0.983877	1.05047	0.943982	0.95718
3688	DATA	8680	53	152	ref|NM_019975|ens|ENSMUST00000022437|ref|XM_006519320|gb|AK050078	mm|chr14:32421176-32421117	0	NA	1853	GAGGAATTTTCTCTTTCCCGCAAGGTAGAATTTACTTTTCATAGCAAAATTACCATAGTG	8231	0	A_66_P128918	Hacl1	NM_019975	ref|Mus musculus 2-hydroxyacyl-CoA lyase 1 (Hacl1), mRNA [NM_019975]	0.898494	0.0594881	1.26393	0.0279725	9.62868	2	0	0	0	0.346132	1.06895	0.827707	0.836372	0.954941	0.904169	1.2921	1.26353	1.23616	1.05101	1.08598	1.13295
3690	DATA	8688	53	160	ref|NM_010577|ens|ENSMUST00000023128|gb|AK211202|gb|AK142241	mm|chr15:103175081-103175022	0	NA	4002	GGGTTGATCTGGAGCCCAGTCTCGGATTCTAAGAACCTATGCTAGCAGACCCAAGGTGGC	8246	0	A_52_P364140	Itga5	NM_010577	ref|Mus musculus integrin alpha 5 (fibronectin receptor alpha) (Itga5), mRNA [NM_010577]	1.27937	0.254792	0.891575	0.0700104	2.54196	2	0	0	0	0.319407	0.770411	0.808104	1.13494	1.1296	1.57356	0.964221	0.885966	0.824537	1.19181	1.04052	1.35693
3695	DATA	8699	54	7	ref|NM_007906|ens|ENSMUST00000055990|gb|L26479|gb|BC018235	mm|chr2:180884486-180884427	0	NA	1290	CGGGTTCAATGTGAAGAATGTGTCCGTTAAGGATATTCGCCGGGGCAATGTCTGCGGGGA	7971	0	A_51_P485862	Eef1a2	NM_007906	ref|Mus musculus eukaryotic translation elongation factor 1 alpha 2 (Eef1a2), mRNA [NM_007906]	0.788149	0.0870008	1.16822	0.119851	4.44498	3	0	0	0	1.03858	0.95095	0.907856	0.687715	0.840341	0.836391	1.11543	1.08382	1.3054	0.978243	1.0946	1.16068
3700	DATA	8710	54	18	ref|NM_031868|ens|ENSMUST00000046094|ens|ENSMUST00000180575|gb|AK151582	mm|chr19:4195360-4195419	0	NA	1303	GCAGCCAGATCCTGGGGCAACCCATCTGGTCTCTTGAATAAAGGTCAAAGCTGGATTCTC	7993	0	A_55_P2039439	Ppp1ca	NM_031868	ref|Mus musculus protein phosphatase 1, catalytic subunit, alpha isoform (Ppp1ca), mRNA [NM_031868]	1.11624	0.138469	0.838967	0.17228	2.17275	3	0	0	0	0.869979	1.05339	1.21193	1.03294	1.03969	1.27608	0.977104	0.893871	0.645927	1.07293	1.01534	0.910816
3702	DATA	8714	54	22	gb|AK007108|tc|TC1674132|riken|1700101I19|nap|NAP020694-001	mm|chr1:34636314-34636255	0	NA	148	AATGCTGTGGGTTTTGCATCCCTAAACCCCTTTGGTCCTCAGTCCGGGGGTCCCCGTATA	8000	0	A_55_P2007791	1700101I19Rik	AK007108	gb|Mus musculus adult male testis cDNA, RIKEN full-length enriched library, clone:1700101I19 product:hypothetical protein, full insert sequence. [AK007108]	1.66511	0.221903	0.202064	0.349227	6.12443	3	0	0	0	0.945898	1.12385	1.19167	1.6927	1.4307	1.87192	0.000437578	0.605317	0.000437578	0.526917	1.34008	1.27007
3703	DATA	8718	54	26	ref|NM_027490|ens|ENSMUST00000025350|gb|AK141222|tc|TC1667576	mm|chr18:44584158-44584217	0	NA	8177	TGGACCAGAAAGGCTAGGAATGTATAGGATAAACATGAGAAGTTGTTCGCATTCATAGAA	8008	0	A_65_P13739	Dcp2	NM_027490	ref|Mus musculus DCP2 decapping enzyme homolog (S. cerevisiae) (Dcp2), mRNA [NM_027490]	1.01442	0.043437	1.17888	0.0391852	4.86937	3	0	0	0	1.06682	0.540968	0.681854	0.996581	1.06393	0.982739	1.142	1.22002	1.17462	0.918187	0.934212	1.27806
3711	DATA	8732	54	40	ref|NM_001243064|ref|NM_007616|ens|ENSMUST00000115456|ens|ENSMUST00000115454	mm|chr6:17289414-17289473	0	NA	707	TATTCAGCAACATCCGCATCAGCACGCAGAAAGAGATATGAGGGACATTTCAAGGATGAA	8034	0	A_55_P2126662	Cav1	NM_001243064	ref|Mus musculus caveolin 1, caveolae protein (Cav1), transcript variant 2, mRNA [NM_001243064]	1.05125	0.104321	0.913703	0.0209845	2.23893	2	0	0	0	0.965479	0.98821	1.21494	0.953822	1.03863	1.16131	0.923951	0.927594	0.889563	0.863627	1.10274	0.970141
3714	DATA	8736	54	44	ref|NM_007997|ens|ENSMUST00000021078|ens|ENSMUST00000155130|ref|XM_006532186	mm|chr11:115129626-115129567	0	NA	1578	AGCCCCTACCGTGCAAGACAAGAGCCGGACAGTCTGGGTTGGACTCTTCTCTCGTTCATT	8042	0	A_51_P461578	Fdxr	NM_007997	ref|Mus musculus ferredoxin reductase (Fdxr), mRNA [NM_007997]	1.18054	0.199718	0.888739	0.180661	1.87674	3	0	0	0	0.979084	0.93406	0.915991	1.08315	1.0482	1.41027	0.997844	0.988168	0.680205	0.944328	1.07693	0.941761
3720	DATA	8754	54	62	ref|NM_011666|ref|NM_001301857|ref|NM_001111106|ref|NM_001301858	mm|chr6:97134282-97134223	0	NA	1975	GGCAGTGTCTTCATTGCTACTCATATAATTGTGACTATCCATGTGTGTATTAATTATTGC	8076	0	A_51_P341978	Uba3	NM_011666	ref|Mus musculus ubiquitin-like modifier activating enzyme 3 (Uba3), transcript variant 1, mRNA [NM_011666]	0.923192	0.093045	1.18979	0.12101	3.02505	3	0	0	0	1.17033	0.793939	0.789618	0.828849	0.925845	1.01488	1.25157	1.26744	1.05036	0.861143	0.959391	1.08663
3735	DATA	8790	54	98	gb|AK032850|tc|TC1602251|riken|6720462K09	mm|chr4:148629322-148629263	0	NA	1500	TGACTAGCCTATTTCCATACATAATATTAGTATCCCGATTCCTTTCTAAACTTCTCTGGC	8138	0	A_55_P2286650	6720462K09Rik	AK032850	gb|Mus musculus 12 days embryo male wolffian duct includes surrounding region cDNA, RIKEN full-length enriched library, clone:6720462K09 product:unclassifiable, full insert sequence. [AK032850]	1.15739	0.216315	0.579905	0.225928	3.19784	3	0	0	0	1.48969	1.28069	0.707654	1.30723	1.25555	0.909404	0.336105	0.782208	0.621402	1.04437	1.3116	0.954102
3736	DATA	8793	54	101	gb|AK162627|tc|TC1680277|riken|9830121P04	mm|chr16:91469535-91469594	0	NA	4250	GTGTCTAACTCACACTTTAAGGCTACGAGATACAAGGCATTATATATTAATAAAGGCTCA	8143	0	A_52_P1149693	A930006K02Rik	AK162627	gb|Mus musculus adult male bone cDNA, RIKEN full-length enriched library, clone:9830121P04 product:unclassifiable, full insert sequence. [AK162627]	1.13956	0.109758	0.441566	0.384735	3.02178	2	0	0	0	1.06192	1.9027	0.45726	1.24503	1.14769	1.02597	0.618529	0.705979	0.000191322	1.20597	1.47677	1.152
3747	DATA	8817	54	125	ref|NM_032008|ens|ENSMUST00000038522|ens|ENSMUST00000102956|ref|XM_006519724	mm|chr14:27241973-27241914	0	NA	2395	GGATGCAGCTGACCTAAAAACTCTCCTCAGTAAGGCTGAAAACCAAGCAAAGGATGTACA	8185	0	A_51_P487623	Slmap	NM_032008	ref|Mus musculus sarcolemma associated protein (Slmap), mRNA [NM_032008]	1.24566	0.115197	0.890198	0.0868917	4.26681	3	0	0	0	0.795029	0.868903	1.0436	1.28155	1.11679	1.33864	0.952711	0.790976	0.926906	0.979086	1.09167	0.814154
3749	DATA	8828	54	136	ref|NM_001048250|ens|ENSMUST00000095458|ref|XM_006517780|ref|XM_006517781	mm|chr13:108839233-108839292	0	NA	1756	GAGCAACATTCACTGCAGTATTGAAGTGCTTATTACTGTTTTCTGCATCTCTGATAATTT	8203	0	A_55_P1997661	Smim15	NM_001048250	ref|Mus musculus small integral membrane protein 15 (Smim15), mRNA [NM_001048250]	0.87303	0.216479	1.15607	0.0429663	2.22125	2	0	0	0	1.06284	0.933539	0.92651	0.928962	1.05605	0.634074	1.20423	1.14228	1.12168	1.07387	0.914086	1.00187
3759	DATA	8845	54	153	ref|NM_010771|ens|ENSMUST00000190029|ens|ENSMUST00000188767|ens|ENSMUST00000187389	mm|chr18:35747504-35748041	0	NA	2680	GTTGGTATAGACTATGTGATACCTAAAACAGGGTTTTACTGTAAGCTGTGTTCACTCTTT	8234	0	A_55_P2151751	Matr3	NM_010771	ref|Mus musculus matrin 3 (Matr3), mRNA [NM_010771]	0.921911	0.0811499	1.20828	0.0492031	5.22651	3	0	0	0	0.437562	1.22953	0.956814	0.892951	1.01357	0.859214	1.15856	1.20933	1.25695	0.947336	0.999464	1.03873
3760	DATA	8846	54	154	ref|NM_027884|ref|NM_001289895|ens|ENSMUST00000169786|ref|XM_006495863	mm|chr1:73956907-73956848	0	NA	9863	GATATGAATGTATGTACACTGATGCTGCCCCCCTCTGTACAGCGGCTTGGCCTCTCACGA	8236	0	A_51_P365008	Tns1	NM_027884	ref|Mus musculus tensin 1 (Tns1), transcript variant 1, mRNA [NM_027884]	1.09003	0.0162061	0.982458	0.102545	1.7947	2	0	0	0	0.450532	1.08124	1.04191	1.07364	1.0904	1.10605	0.864232	1.04727	1.03587	1.00816	1.09666	1.10404
3762	DATA	8848	54	156	ref|NM_178711|ens|ENSMUST00000034941|ref|XM_006511130|gb|AK165919	mm|chr9:92387212-92387271	0	NA	3116	CATGCAATTTCTGTAACCCAGTAGAATTTCACTGTATCAAGACAGCCTACTTAACTAAAA	8240	0	A_55_P2909044	Plscr4	NM_178711	ref|Mus musculus phospholipid scramblase 4 (Plscr4), mRNA [NM_178711]	0.934611	0.0855438	1.14406	0.146788	2.13531	3	0	0	0	0.49604	1.02705	1.12579	0.964199	1.00143	0.838201	1.03837	1.08215	1.31166	1.0193	1.0482	1.0476
3764	DATA	8850	54	158	ref|NM_013826|ref|NM_001113374|ref|NM_001113375|ens|ENSMUST00000184046	mm|chr13:115618697-115618756	0	NA	957	AACCTGTGATAAGATGTCTGCAATAGACTCAGCCTTCTGTGACTAACTCCTAACTAACCA	8244	0	A_52_P674309	Mocs2	NM_013826	ref|Mus musculus molybdenum cofactor synthesis 2 (Mocs2), transcript variant 1, mRNA [NM_013826]	1.10414	0.114715	1.0033	0.0319999	1.46655	2	0	0	0	0.375821	0.993901	1.00393	1.0346	1.04127	1.23654	1.01293	0.967585	1.02937	1.10275	1.12159	1.07971
3766	DATA	8853	54	161	ens|ENSMUST00000190834|gb|AK053023|gb|BB307942|riken|D930020E22	mm|chr9:86394473-86394532	0	NA	3836	TGAACCGAAGACTTTATGCATGGCTTCTTGGTAGGTAATTAATGAGCATGCTTATAATTG	8249	0	A_55_P2807461	Dopey1	ENSMUST00000190834	ens|dopey family member 1 [Source:MGI Symbol;Acc:MGI:1289294] [ENSMUST00000190834]	1.05859	0.0460511	0.78006	0.223254	2.11636	2	0	0	0	0.439147	1.33065	1.38922	1.07803	1.09174	1.00601	0.52244	0.900709	0.917029	1.09922	1.2162	1.0096
3769	DATA	8858	55	2	ref|NM_134006|ens|ENSMUST00000026406|ref|XM_006513386|ref|XM_006513385	mm|chr10:128350657-128350646	0	NA	1199	AGTGCTGCCTGGTTTCTGATACCAATTAGGCTCTCAATAAATATGTATGCTTTAAATCAA	8257	0	A_66_P138289	Rdh5	NM_134006	ref|Mus musculus retinol dehydrogenase 5 (Rdh5), mRNA [NM_134006]	1.13185	0.118063	0.801847	0.0853399	3.92366	3	0	0	0	0.818817	0.995823	1.27386	1.20264	0.995559	1.19736	0.859442	0.842295	0.703803	1.01139	1.04067	1.05834
3773	DATA	8866	55	10	ref|NM_011808|ref|NM_001038642|ens|ENSMUST00000050797|ens|ENSMUST00000034534	mm|chr9:32561826-32561885	0	NA	1480	ACAAACCTAAGATGAATTATGAGAAACTGAGCCGTGGCCTTCGCTACTATTATGACAAAA	8272	0	A_52_P232830	Ets1	NM_011808	ref|Mus musculus E26 avian leukemia oncogene 1, 5' domain (Ets1), transcript variant 1, mRNA [NM_011808]	1.02593	0.0596335	0.681274	0.260574	2.23324	2	0	0	0	1.02586	1.23507	1.54454	1.07421	1.04432	0.959274	0.870289	0.789508	0.384025	1.01102	1.06648	0.995405
3778	DATA	8881	55	25	ref|XM_011250513|ref|XM_006539829|gb|AK146784|gb|AK122565	mm|chr7:20010518-20010459	0	NA	3605	AATACATGTATTCAATAAACAATCAACGACTGGTGCCGACTCCACGCTAGGCCCAGTTCT	8299	0	A_55_P2142580	Mark4	XM_011250513	ref|PREDICTED: Mus musculus MAP/microtubule affinity-regulating kinase 4 (Mark4), transcript variant X2, mRNA [XM_011250513]	1.19708	0.0913929	0.845072	0.0888761	4.78255	3	0	0	0	0.953793	0.937226	0.868267	1.1341	1.15523	1.3019	0.864453	0.922659	0.748105	1.09127	1.09859	0.924409
3794	DATA	8918	55	62	ref|NM_029610|ref|NM_001285961|ref|NM_001285960|ref|NM_001285959	mm|chr7:127060205-127060264	0	NA	1216	TGGTCTCCTGATTCTTGTAATTTTCAGATTTACCCACTTATAAAGGACAGCTTTAGATTG	8361	0	A_55_P2489914	Lyrm1	NM_029610	ref|Mus musculus LYR motif containing 1 (Lyrm1), transcript variant 1, mRNA [NM_029610]	0.871799	0.0736267	1.20638	0.104173	4.54286	3	0	0	0	0.991831	0.78755	0.695541	0.876272	0.943088	0.796038	1.32454	1.16681	1.12779	1.10643	1.11779	1.06631
3809	DATA	8953	55	97	ref|NM_016876|ens|ENSMUST00000004206|gb|U70733|gb|AK168362	mm|chr9:20699154-20699095	0	NA	896	GGAGGATGCTGCACGTGCCATTGCAGGGGTGTCTGGTTTTGGCTACGACCATCTTATCCT	8426	0	A_51_P489229	Eif3g	NM_016876	ref|Mus musculus eukaryotic translation initiation factor 3, subunit G (Eif3g), mRNA [NM_016876]	1.16936	0.138823	0.835179	0.0839681	3.56761	3	0	0	0	0.869597	0.973977	1.36819	1.02933	1.1718	1.30694	0.795385	0.931646	0.778506	0.872651	0.985068	0.916911
3810	DATA	8954	55	98	ref|NM_032396|ens|ENSMUST00000020662|ref|XM_006514913|ref|XM_006514912	mm|chr11:5110086-5110027	0	NA	565	ATGGAGTCAGGCTATGCCTGCTTCTGTGGGAACAATCCTGACTACTGGAAGCACGGGGAG	8428	0	A_55_P2046149	Kremen1	NM_032396	ref|Mus musculus kringle containing transmembrane protein 1 (Kremen1), mRNA [NM_032396]	0.935518	0.293221	0.188235	0.325502	2.95444	3	0	0	0	4.67908	0.921528	1.44454	0.679921	0.871013	1.25562	0.000306156	0.564092	0.000306156	0.483981	0.622516	0.477093
3811	DATA	8956	55	100	ref|NM_001191004|ref|NM_030145|ens|ENSMUST00000146824|ens|ENSMUST00000126174	mm|chr8:81332060-81332001	0	NA	507	GGTTCTCTTACTATCTTAGTTGGCCTGTTTTCATGGTGGTCGGTGGGGGTTTGTTTGTTT	8432	0	A_55_P2025601	Lsm6	NM_001191004	ref|Mus musculus LSM6 homolog, U6 small nuclear RNA associated (S. cerevisiae) (Lsm6), transcript variant 1, mRNA [NM_001191004]	1.13026	0.17474	0.900805	0.00650091	2.27287	2	0	0	0	0.796279	0.968939	1.14445	0.978372	1.09119	1.32124	0.908306	0.896809	0.8973	1.02878	1.10435	0.863987
3817	DATA	8975	55	119	ref|NM_001045528|ens|ENSMUST00000107461|ens|ENSMUST00000098033|ens|ENSMUST00000084528	mm|chr4:61983280-61983221	0	NA	1867	AGAAAAGCAGTCGGATAGAAGAGCAGAATGACAAGATTAGTGACCTCATTGAACGCAACC	8463	0	A_52_P156578	Fkbp15	NM_001045528	ref|Mus musculus FK506 binding protein 15 (Fkbp15), mRNA [NM_001045528]	1.11096	0.0211648	0.566668	0.506145	1.86095	2	0	0	0	0.963256	0.887669	1.4652	1.08727	1.11759	1.12801	0.725126	0.974625	0.000252657	1.14917	1.31845	1.18338
3823	DATA	8993	55	137	ref|NM_011551|ref|NM_001302954|ref|NM_001302955|ref|NM_001044383	mm|chr11:102167054-102166995	0	NA	3511	TGTGTGTGTGTGTGTGTGTGTGTGTGTGTCTAGAGCCTGTCTCTTTGAATCTGGAAAAAG	8496	0	A_55_P1992680	Ubtf	NM_011551	ref|Mus musculus upstream binding transcription factor, RNA polymerase I (Ubtf), transcript variant 1, mRNA [NM_011551]	0.866968	0.0700332	1.10739	0.138589	2.68176	2	0	0	0	0.944187	0.94729	0.959924	0.787	0.917369	0.896535	1.04791	1.00846	1.26579	0.958816	1.11108	1.15563
3826	DATA	9000	55	144	ref|NM_015824|ref|NM_001159563|ens|ENSMUST00000156987|ens|ENSMUST00000132918	mm|chr4:34527110-34527051	0	NA	1448	TGAACTGGTGAGCATACTTCAGCGCTGTATTGAGGTTTTAGATTCCTCTACTGAAAAGCA	8508	0	A_52_P534411	Orc3	NM_015824	ref|Mus musculus origin recognition complex, subunit 3 (Orc3), transcript variant 1, mRNA [NM_015824]	0.840804	0.102194	1.09062	0.0862283	3.23596	3	0	0	0	1.22286	0.892296	1.06827	0.808788	0.955173	0.758452	1.06394	1.18703	1.02088	0.95055	0.995685	1.07607
3828	DATA	9003	55	147	ref|NM_013902|ens|ENSMUST00000021332|gb|AK012346|gb|AK150802	mm|chr12:66163656-66163597	0	NA	707	CGGACATCAGCAAACATAAAAATGAGCTGTGGCTAATTAGAGCTTGTAAGGGAAGAGTCA	8514	0	A_52_P531175	Fkbp3	NM_013902	ref|Mus musculus FK506 binding protein 3 (Fkbp3), mRNA [NM_013902]	0.764231	0.130283	1.04996	0.0142446	3.77619	2	0	0	0	1.74846	0.935526	0.863696	0.77391	0.889404	0.629378	1.0419	1.04158	1.06641	0.954411	1.01281	1.04251
3831	DATA	9015	55	159	ref|NM_145833|ens|ENSMUST00000051674|gb|AF521097|nap|NAP098592-001	mm|chr4:133559304-133559245	0	NA	3420	TTCCTTCCCTTCTCTTCCCTGGGAAAATAAAGACTTATTGGTACTCCAGAGTTGGTACTG	8536	0	A_55_P2074371	Lin28a	NM_145833	ref|Mus musculus lin-28 homolog A (C. elegans) (Lin28a), mRNA [NM_145833]	0.794546	0.167477	1.08286	0.117445	2.4413	3	0	0	0	2.06205	0.643181	0.615196	0.661605	0.739388	0.982645	1.01694	1.21846	1.01318	0.970767	1.0279	1.0487
3834	DATA	9019	55	163	ref|NM_023622|ens|ENSMUST00000045726|ref|XM_006510613|ref|XM_006510612	mm|chr9:21776030-21775971	0	NA	2490	CCCCAGACCCTGGATGGTTTCTCAGCACTTCTAAAAATAAAAGTCTTCAGGGGTTTTGCA	8544	0	A_55_P2086825	Rgl3	NM_023622	ref|Mus musculus ral guanine nucleotide dissociation stimulator-like 3 (Rgl3), mRNA [NM_023622]	1.21533	0.118324	0.955053	0.0804281	3.15101	3	0	0	0	0.473573	0.858042	1.19453	1.07945	1.27092	1.29563	0.958961	0.872742	1.03346	1.01533	1.05515	0.892222
3839	DATA	9035	56	15	ref|NM_028597|ens|ENSMUST00000151158|ens|ENSMUST00000026990|gb|BC019603	mm|chr13:54567625-54567566	0	NA	577	AGTTTGAGGTCAATGAGATCTCATGGAACAACGACAACAACATGTTCTTCCTGACCAACG	8282	0	A_52_P869802	Thoc3	NM_028597	ref|Mus musculus THO complex 3 (Thoc3), mRNA [NM_028597]	0.906412	0.178708	1.2983	0.113153	3.20907	3	0	0	0	0.882425	0.780098	0.616957	0.700149	1.01487	1.00422	1.16769	1.36661	1.36062	1.02876	0.971108	1.1065
3842	DATA	9045	56	25	gb|BC011192	mm|chr7:123475172-123475113	0	NA	1169	TCCAGTCACCAAGAGAGTTGATGGGTCCTGAAGTCTGGTACTAATCCCAGTTTCTCTTTT	8300	0	A_52_P646112	Rps13	BC011192	gb|Mus musculus ribosomal protein S13, mRNA (cDNA clone MGC:18694 IMAGE:4016679), complete cds. [BC011192]	1.44213	0.0604819	0.60995	0.178415	7.65115	2	0	0	0	1.19813	1.28376	0.686201	1.37491	1.49214	1.45935	0.575742	0.802992	0.451115	0.901478	1.0394	0.734786
3852	DATA	9057	56	37	ref|NM_023230|ens|ENSMUST00000060645|ens|ENSMUST00000109207|ref|XM_006500013	mm|chr2:167433408-167433349	0	NA	1680	TCAGGACCACTAAATGTTGAAATGTGGATGCATACCGAAATAAAGGCAATCCGTTGTGTT	8318	0	A_55_P1990525	Ube2v1	NM_023230	ref|Mus musculus ubiquitin-conjugating enzyme E2 variant 1 (Ube2v1), mRNA [NM_023230]	1.17164	0.0556405	0.910045	0.24477	1.80508	2	0	0	0	0.836428	0.677548	1.06645	1.1423	1.13682	1.23581	1.08101	1.01948	0.629651	1.23072	0.874086	1.0697
3873	DATA	9100	56	80	ref|NM_026167|ref|NM_001290476|ens|ENSMUST00000035973|ens|ENSMUST00000115313	mm|chrX:22796746-22796687	0	NA	2901	AATTCTTCTAAAAAGCAGCTTCCATGAAAAATGGGGATTCAGTATGCACACATTAAATGC	8395	0	A_51_P521304	Klhl13	NM_026167	ref|Mus musculus kelch-like 13 (Klhl13), transcript variant 1, mRNA [NM_026167]	0.668299	0.174289	1.59936	0.247174	5.33204	3	0	0	0	1.13163	1.14926	0.745659	0.525641	0.862564	0.616691	1.36204	1.5807	1.85533	0.629372	0.683495	0.857616
3875	DATA	9106	56	86	ref|NM_026826|ens|ENSMUST00000198453|ens|ENSMUST00000143477|ens|ENSMUST00000016977	mm|chr5:101233418-101233477	0	NA	433	CCGAGAATAAATTTTGTATTTGTGAAGTTCCTGCCAATAAACCTCTAAGTGGTTGTCAGC	8407	0	A_55_P2027147	Mrps18c	NM_026826	ref|Mus musculus mitochondrial ribosomal protein S18C (Mrps18c), mRNA [NM_026826]	0.882824	0.31764	1.18295	0.0741291	1.59375	2	0	0	0	0.880523	0.935875	0.733719	1.01334	1.11442	0.520718	1.16511	1.11938	1.26438	1.14104	1.14645	0.965055
3876	DATA	9108	56	88	ref|NM_153129|ens|ENSMUST00000025786|ref|XM_011248597|gb|BC062886	mm|chr19:5134317-5134258	0	NA	3709	TTGGATGTCCTGTGTTTTGTGTGTGTTTTAGTTGTTTGGGTAACTTGTCCTGTGCACAGG	8411	0	A_52_P417620	Pacs1	NM_153129	ref|Mus musculus phosphofurin acidic cluster sorting protein 1 (Pacs1), mRNA [NM_153129]	0.763551	0.172736	1.24671	0.249666	2.75647	3	0	0	0	1.10283	0.93759	0.886477	0.587286	0.77084	0.932527	0.961181	1.42394	1.355	0.967967	0.972814	1.10154
3880	DATA	9119	56	99	ref|NM_019472|ens|ENSMUST00000110457|ref|XM_006520025|ref|XM_006520027	mm|chr15:25709396-25709455	0	NA	2794	TTCCTTGCGAGGAAGAAATTTTTGCACCTGAAAAAGGCAGCCATCGTGTTCCAGAAGCAA	8431	0	A_55_P2729090	Myo10	NM_019472	ref|Mus musculus myosin X (Myo10), mRNA [NM_019472]	1.26504	0.130814	0.530451	0.21394	5.07383	3	0	0	0	0.855885	1.29	1.06741	1.38656	1.28196	1.12658	0.724264	0.566203	0.300888	1.02233	1.4024	0.975508
3881	DATA	9124	56	104	ref|NM_001081237|ens|ENSMUST00000036003|gb|AK129335|gb|BC011326	mm|chr6:147060976-147061035	0	NA	6246	CTGGCAAAGCAAAGGAAAATGTGATTTGTTGTATCACTTCAGGGTGCGACATTTCTCTGT	8439	0	A_52_P93066	Klhl42	NM_001081237	ref|Mus musculus kelch-like 42 (Klhl42), mRNA [NM_001081237]	1.14508	0.276656	0.753034	0.210619	1.95294	3	0	0	0	0.926894	1.94896	0.820217	0.940798	1.03453	1.45992	0.814703	0.925935	0.518464	0.833402	0.936183	0.839994
3882	DATA	9125	56	105	ref|NM_017393|ens|ENSMUST00000002735|gb|AJ005253|gb|AK168053	mm|chr17:57135532-57135592	0	NA	944	TGGATTGAGGTTGCCCTCAGAGCAGGCAGACTGCCTGAGACACTGTGATTTAAATTAAAT	8441	0	A_51_P139021	Clpp	NM_017393	ref|Mus musculus caseinolytic mitochondrial matrix peptidase proteolytic subunit (Clpp), mRNA [NM_017393]	1.16211	0.141795	0.860397	0.120191	2.8114	3	0	0	0	0.845811	0.86287	1.29304	1.06579	1.09561	1.32494	0.958695	0.896097	0.726401	1.04072	0.987694	0.902327
3893	DATA	9150	56	130	ens|ENSMUST00000188406|nap|NAP058895-1	mm|chr1:25069545-25069601	0	NA	759	GCCCAAGTTACCAACAGTCATGGGAATAATGGGTGCATAAATGTGGTCTTGCTGGTTTGA	8483	0	A_55_P2109599	ENSMUST00000188406	ENSMUST00000188406	ens|predicted gene 9443 [Source:MGI Symbol;Acc:MGI:3779853] [ENSMUST00000188406]	0.836439	0.191441	1.2039	0.135295	2.71497	3	0	0	0	0.981292	0.952551	0.920164	0.950197	0.943708	0.615414	1.31903	1.05488	1.23778	1.00871	0.915455	1.10082
3896	DATA	9155	56	135	ref|NM_027009|ens|ENSMUST00000145106|ens|ENSMUST00000156667|ens|ENSMUST00000127366	mm|chr5:152445653-152445594	0	NA	960	ACTGTGATGGGCAGCTGAAAGGGGAAGTGGCACAGATGGCAGCCTACTATGAGCACCGAC	8493	0	A_66_P140935	Rfc3	NM_027009	ref|Mus musculus replication factor C (activator 1) 3 (Rfc3), mRNA [NM_027009]	0.907673	0.0368646	1.17619	0.129086	3.46438	2	0	0	0	0.985181	0.852491	1.02442	0.945696	0.905235	0.872087	1.32519	1.09827	1.1051	1.0466	0.870137	0.969582
3903	DATA	9165	56	145	ref|NM_001195760|ens|ENSMUST00000179550|gb|BX517223|tc|TC1664370	mm|chr3:90395296-90395355	0	NA	180	TTCCGGATGTATGCCCTGGTTCTGGTGGATTCTGCTATCTGGTTTAATAACTTCCTTGAG	8511	0	A_55_P2039704	S100a2	NM_001195760	ref|Mus musculus S100 calcium binding protein A2 (S100a2), mRNA [NM_001195760]	0.819748	0.0748701	1.37099	0.345845	2.69824	2	0	0	0	0.75325	0.935705	0.328249	0.841709	0.881182	0.736353	1.1927	1.15068	1.7696	1.06009	0.958139	1.39234
3905	DATA	9169	56	149	ref|NM_175374|ens|ENSMUST00000019908|gb|AK078897|gb|AK036424	mm|chr10:4533288-4533347	0	NA	1254	TGTTCGGATTATGAGGCTCTAGTAGAAATGATTTCCAGAAGAGACTAAGCTTCTTTGTAA	8519	0	A_51_P397548	Mtrf1l	NM_175374	ref|Mus musculus mitochondrial translational release factor 1-like (Mtrf1l), mRNA [NM_175374]	0.892813	0.139393	1.01057	0.0341138	1.42125	2	0	0	0	1.43197	0.982207	0.942163	0.972129	0.974448	0.731862	0.97641	1.04464	1.01066	0.925752	1.01351	0.994247
3906	DATA	9170	56	150	gb|AK086482|gb|BC082334|gb|AK083494|gb|BB526135	mm|chr7:6722710-6722769	0	NA	2763	GTTGTCTTTTGATCTCCACAAGTGCCTATCCCCCTTCATGCAAAATAAATAAACTAATGT	8521	0	A_66_P130447	Usp29	AK086482	gb|Mus musculus 15 days embryo head cDNA, RIKEN full-length enriched library, clone:D930031I02 product:inferred: ubiquitin specific protease 29, full insert sequence. [AK086482]	0.899478	0.15175	1.16635	0.0603067	2.83064	2	0	0	0	0.805718	0.943835	0.71392	1.07074	0.781753	0.845941	1.1055	1.16744	1.2261	0.983007	1.33338	1.02267
3910	DATA	9179	56	159	ref|NM_027212|ens|ENSMUST00000037115|gb|AK011104|gb|AK007739	mm|chr15:52561697-52561756	0	NA	581	ATGCTGGCAATGAGGAACTAAAGCGATATTTAAATCTCCTGCTCTACTCATGTGATGAAG	8537	0	A_51_P161874	Med30	NM_027212	ref|Mus musculus mediator complex subunit 30 (Med30), mRNA [NM_027212]	0.979072	0.174601	1.22912	0.021823	2.46135	2	0	0	0	0.432382	1.01041	1.02821	0.880699	0.875853	1.18066	1.21533	1.21775	1.25428	0.929249	0.912941	1.06222
3917	DATA	9194	57	10	ens|ENSMUST00000191387|gb|AK133994|riken|5830401I21	mm|chr16:4086844-4086785	0	NA	2899	TGTGAGTACGCATATTTGTGTGTATGAGCACAGAGGCCAGAGGAGAATTACTCTGTAGCT	8564	0	A_55_P2714384	Crebbp	ENSMUST00000191387	ens|CREB binding protein [Source:MGI Symbol;Acc:MGI:1098280] [ENSMUST00000191387]	1.34654	0.443132	0.239139	0.413466	3.16478	3	0	0	0	0.834345	1.02852	1.03294	1.80221	1.32031	0.917108	0.000424423	0.716568	0.000424423	1.84553	1.42253	1.0791
3922	DATA	9212	57	28	ens|ENSMUST00000126019|gb|AK013444|tc|TC1587967|riken|2810486E17	mm|chrX:98637257-98637316	0	NA	850	GTGCTAACTCAGCTTTTCTAATGTATTTTTCACTATAGTCCTAAATACTTAGGTATTCAA	8599	0	A_52_P61893	Nono	ENSMUST00000126019	ens|non-POU-domain-containing, octamer binding protein [Source:MGI Symbol;Acc:MGI:1855692] [ENSMUST00000126019]	1.18501	0.161014	0.190991	0.329961	4.68931	2	0	0	0	1.87678	1.15899	1.66563	1.37055	1.1025	1.08197	0.00048774	0.571998	0.00048774	1.27869	0.00048774	1.89142
3923	DATA	9218	57	34	ens|ENSMUST00000197863|ens|ENSMUST00000171235|ens|ENSMUST00000145247|nap|NAP062100-1	mm|chr5:61213580-61213521	0	NA	86	AACTTCCGCATTGGACAGGACATCCAGCCCAAAAGAGATTTAATGTGCTTCCTCAAATGG	8611	0	A_55_P2033876	ENSMUST00000197863	ENSMUST00000197863	ens|predicted gene 5459 [Source:MGI Symbol;Acc:MGI:3643518] [ENSMUST00000171235]	0.813502	0.126359	1.28119	0.176719	3.72873	3	0	0	0	1.11967	1.21252	0.575102	0.803401	0.944607	0.692496	1.2273	1.13769	1.47858	0.966317	0.909502	0.932829
3925	DATA	9221	57	37	ref|NM_001252434|ref|NM_001252435|ref|NM_001252436|ref|NM_001252433	mm|chr16:31805808-31812800	0	NA	1691	ACGAGATCACTAGGGAACCTAGAAAAGTTGTTCTTCATCGTGGCTCAACAGGACTTGGTT	8617	0	A_55_P2786076	Dlg1	NM_001252434	ref|Mus musculus discs, large homolog 1 (Drosophila) (Dlg1), transcript variant 3, mRNA [NM_001252434]	1.23942	0.304132	0.788527	0.139403	2.33431	2	0	0	0	0.805624	0.869256	0.908786	1.1502	1.57818	0.989869	0.70092	0.949279	0.715382	1.15088	0.989387	1.19224
3926	DATA	9222	57	38	gb|AK017701|tc|TC1592644|riken|5730478E03|nap|NAP000591-001	mm|chr14:121326768-121326827	0	NA	2033	ATTGAGACAACCGTTTATTTGTGCAGGAGAAAAACTCCACGGACCCATCTGCGATATGTC	8618	0	A_55_P2728023	Ipo5	AK017701	gb|Mus musculus 8 days embryo whole body cDNA, RIKEN full-length enriched library, clone:5730478E03 product:karyopherin (importin) beta 3, full insert sequence. [AK017701]	1.19981	0.205991	0.719576	0.282019	2.38171	3	0	0	0	0.993321	1.01018	1.00595	1.43749	1.07314	1.08879	0.404471	0.948306	0.805952	1.14473	1.00246	1.08522
3928	DATA	9224	57	40	ref|NM_001277255|ref|NM_001277259|ref|NM_009612|ref|NM_001277257	mm|chr15:100974010-100974069	0	NA	1905	TGTGCCTGCTCAGCTTGGCTCCCAGCCCATCCAGCCAAAAATACAGCTGAGCTGAAATTC	8621	0	A_55_P2011380	Acvrl1	NM_001277255	ref|Mus musculus activin A receptor, type II-like 1 (Acvrl1), transcript variant 5, mRNA [NM_001277255]	1.21647	0.131703	0.856827	0.0903428	3.90026	3	0	0	0	0.787013	0.907668	1.12271	1.26817	1.06676	1.31447	0.894856	0.753687	0.921939	0.995726	1.01061	0.9564
3929	DATA	9225	57	41	ref|NM_021322|ens|ENSMUST00000169454|ens|ENSMUST00000170176|ens|ENSMUST00000171171	mm|chr17:31633311-31633252	0	NA	1845	CTGTATGGCTCTGTAGCTGCTTGCTGTTTTGAGGCAGATTCAGTTGGTGCTGTTCGCACT	8622	0	A_52_P355057	Wdr4	NM_021322	ref|Mus musculus WD repeat domain 4 (Wdr4), mRNA [NM_021322]	1.07461	0.0432842	0.933199	0.06724	3.06298	3	0	0	0	0.983942	0.969632	1.08337	1.06721	1.12112	1.03551	0.913379	1.00812	0.878097	0.888459	1.04303	1.00812
3935	DATA	9240	57	56	ref|NM_001290399|ens|ENSMUST00000113286|gb|BC036719|tc|TC1586079	mm|chrX:130610180-130610239	0	NA	2533	AGGTTTAGAAGCTGAAGGTCAGAACGTCAGGTGACTTGGCCAGATTCACTTAACAAAAAA	8648	0	A_55_P2080703	Cstf2	NM_001290399	ref|Mus musculus cleavage stimulation factor, 3' pre-RNA subunit 2 (Cstf2), transcript variant 3, mRNA [NM_001290399]	0.936208	0.0804926	1.19382	0.23862	1.77184	2	0	0	0	1.08672	1.00455	0.967481	0.964882	0.998436	0.845304	1.0446	1.06784	1.46903	0.762146	0.922539	0.866476
3937	DATA	9252	57	68	ref|NM_028263|ens|ENSMUST00000057337|gb|AK011996|gb|AK167949	mm|chr19:36992177-36992118	0	NA	1618	GTATCTGGGTCATTTGGCCCTTCATCTCTTCTGTGATTAAATTTAAAATGTGTGTGTTTT	8669	0	A_55_P2044385	Fgfbp3	NM_028263	ref|Mus musculus fibroblast growth factor binding protein 3 (Fgfbp3), mRNA [NM_028263]	0.584524	0.103781	1.59871	0.933714	1.86981	2	0	0	0	0.741058	1.59894	0.570445	0.507805	0.543157	0.702608	1.07638	1.04305	2.6767	0.810581	0.944317	0.784964
3944	DATA	9268	57	84	ref|NM_019700|ref|NM_001025561|ref|NM_001025562|ens|ENSMUST00000170468	mm|chr5:111203676-111203617	0	NA	1365	TTTCAAGGAGCAGTACATTTACCCTACCATTGTCAGCACTGAGCGGGATGAGCGGTCCAT	8697	0	A_51_P401377	Pus1	NM_019700	ref|Mus musculus pseudouridine synthase 1 (Pus1), transcript variant 2, mRNA [NM_019700]	0.909019	0.229699	1.19193	0.0299003	2.11542	2	0	0	0	1.21326	1.09534	0.693254	1.08584	0.99182	0.6494	1.16902	1.18101	1.22575	0.796197	0.850823	1.04829
3953	DATA	9296	57	112	gb|AK033055|tc|TC1636813|riken|7530422B04|nap|NAP017642-001	mm|chr2:153474504-153474445	0	NA	640	TTTGTTTTCCTGCTTGTCTGTCTCCATACATTAGATGGTGATCACTAAAGTAGACACTAA	8744	0	A_66_P114295	Dnmt3bos	AK033055	gb|Mus musculus adult male eyeball cDNA, RIKEN full-length enriched library, clone:7530422B04 product:hypothetical protein, full insert sequence. [AK033055]	0.64986	0.263594	1.77726	0.635854	2.8369	2	0	0	0	0.590763	0.887961	0.869543	0.464842	0.533065	0.951673	2.25154	1.05473	2.02551	0.80677	0.713739	0.849871
3960	DATA	9310	57	126	ref|NM_008425|ens|ENSMUST00000042970|tc|TC1656644	mm|chr11:110938023-110938082	0	NA	5331	CCATCTGTTTTGTATCTAAAGTCTTCCTATTGTACTGCACAAACCATGGGTTGTATATAT	8767	0	A_55_P2500688	Kcnj2	NM_008425	ref|Mus musculus potassium inwardly-rectifying channel, subfamily J, member 2 (Kcnj2), mRNA [NM_008425]	0.786852	0.144735	1.26103	0.175982	3.60448	3	0	0	0	1.16817	1.03935	0.894664	0.658237	0.758737	0.943581	1.06773	1.41196	1.3034	0.867047	0.926662	0.960469
3963	DATA	9315	57	131	ref|NM_008256|ens|ENSMUST00000090746|gb|AK098104|gb|BC024744	mm|chr3:98113245-98113304	0	NA	1877	GCCATTTGTTACAGCTTATTCTCAGACTCTGGGCTATTATAGTTTATGCTTGTTTCTTAA	8776	0	A_55_P2912004	Hmgcs2	NM_008256	ref|Mus musculus 3-hydroxy-3-methylglutaryl-Coenzyme A synthase 2 (Hmgcs2), mRNA [NM_008256]	0.217415	0.0551336	1.66061	0.529678	4.6939	2	0	0	0	2.48679	2.39903	0.598488	0.217063	0.272724	0.162459	1.07115	1.81407	2.09661	0.244302	0.31722	0.320096
[truncated: 5,377 more rows]

## Sheet: DvsC
Original row	FEATURES	FeatureNum	Row	Col	accessions	chr_coord	SubTypeMask	SubTypeName	Start	Sequence	ProbeUID	ControlType	ProbeName	GeneName	SystematicName	Description	GroupA mean	GroupA std.dev.	GroupB mean	GroupB std.dev.	Absolute t value	Degrees of freedom	Raw p value	Adj p value	False Discovery Rate	Diab+Parg-24	Diab+Parg-22	Diab+Parg-19	Ctrl+Parg-10	Ctrl+Parg-8	Ctrl+Parg-6	Diab-18	Diab-12	Diab-11	Ctrl-5	Ctrl-4	Ctrl-2
[truncated: 7,040 more rows]

[truncated: 5 more sheets: DvsD+P, C+PvsC, D+PvsC+P, D+PvsC, venn_result]
