# Supplementary material for: Monoamine Oxidase-Dependent Pro-Survival Signaling in Diabetic Hearts Is Mediated by miRNAs
Source: Cells. 2022 Aug 30;11(17):2697. doi: 10.3390/cells11172697 (PMC9454570; doi:10.3390/cells11172697)
Supplement: Supplementary file 1 [file cells-11-02697-s001.zip › 6.Enrichment-of-615-genes-Supplementary Table S6.xlsx]

## Sheet: 615 genes enrichment analysis
Annotation Cluster 1	Enrichment Score: 2.081785409955489
Category	Term	Count	%	PValue	Genes	List Total	Pop Hits	Pop Total	Fold Enrichment	Bonferroni	Benjamini	FDR
UP_KEYWORDS	Transcription regulation	59	11.0902	0.000980725	CALCOCO1, ZFP488, CHD7, CTNND1, TTF2, AHR, PRDM1, NOC2L, MED16, MYSM1, ABRA, RCBTB1, ELK3, NKRF, CHEK2, ZFP120, EPC1, TRIM27, SOX9, NKX3-2, KLF10, BCAS3, MYOCD, MED9, COMMD7, POU5F2, CREB3, ERF, TFAM, MZF1, FLII, KMT2B, TAF5L, FSTL3, ZKSCAN6, FAM120B, HIVEP1, E2F2, BEND5, ZFP143, KDM4A, TCF7L1, HACE1, BRF2, NR1H2, PDX1, IRF2BP1, CDC5L, EIF2AK2, MTERF1A, WTIP, USF1, CDK9, MAD2L2, BCL3, ZFP112, MAM…	483	1799	22680	1.53999	0.245429	0.066788	0.0658571
UP_KEYWORDS	Transcription	59	11.0902	0.00208846	CALCOCO1, ZFP488, CHD7, CTNND1, TTF2, AHR, PRDM1, NOC2L, MED16, MYSM1, ABRA, RCBTB1, ELK3, NKRF, CHEK2, ZFP120, EPC1, TRIM27, SOX9, NKX3-2, KLF10, BCAS3, MYOCD, MED9, COMMD7, POU5F2, CREB3, ERF, TFAM, MZF1, FLII, KMT2B, TAF5L, FSTL3, ZKSCAN6, FAM120B, HIVEP1, E2F2, BEND5, ZFP143, KDM4A, TCF7L1, HACE1, BRF2, NR1H2, PDX1, IRF2BP1, CDC5L, EIF2AK2, MTERF1A, WTIP, USF1, CDK9, MAD2L2, BCL3, ZFP112, MAM…	483	1859	22680	1.49028	0.451197	0.0998981	0.0985058
GOTERM_BP_DIRECT	GO:0006351~transcription, DNA-templated	61	11.4662	0.00315481	CALCOCO1, ZFP488, CHD7, CTNND1, TTF2, AHR, PRDM1, NOC2L, MED16, MYSM1, ABRA, RCBTB1, ELK3, NKRF, CHEK2, ZFP120, EPC1, TRIM27, SOX9, NKX3-2, KLF10, BCAS3, MYOCD, MED9, HDGFRP2, COMMD7, POU5F2, CREB3, ERF, TFAM, FLII, KMT2B, TAF5L, FSTL3, ZKSCAN6, FAM120B, HIVEP1, E2F2, BEND5, ZFP143, KDM4A, TCF7L1, HACE1, BRF2, GM10674, NR1H2, PDX1, IRF2BP1, CDC5L, EIF2AK2, MTERF1A, WTIP, USF1, SKI, CDK9, MAD2L2, …	405	1885	18082	1.44481	0.997851	1	1
GOTERM_BP_DIRECT	GO:0006355~regulation of transcription, DNA-templated	70	13.1579	0.00503176	CALCOCO1, ZFP566, ZFP488, CHD7, CTNND1, TTF2, AHR, PRDM1, NOC2L, MED16, MYSM1, ABRA, RCBTB1, ELK3, 9030624G23RIK, NKRF, CHEK2, ZFP120, EPC1, TRIM27, SOX9, NKX3-2, TMPO, KLF10, BCAS3, MYOCD, MED9, ZFP619, COMMD7, POU5F2, CREB3, ERF, TFAM, MZF1, ZFP940, FLII, KMT2B, ZFP948, TAF5L, NTN3, FSTL3, ZKSCAN6, FAM120B, HIVEP1, E2F2, BEND5, ZFP143, KDM4A, IRX2, TCF7L1, ZFP114, HACE1, ZFP235, BRF2, NR1H2, PD…	405	2279	18082	1.37134	0.999945	1	1
UP_KEYWORDS	Activator	22	4.13534	0.0268349	CALCOCO1, TCF7L1, MYOCD, BRF2, FLII, NR1H2, PDX1, CDC5L, MED9, AHR, MED16, MYSM1, ABRA, ELK3, CREB3, FAM120B, BCL3, EPC1, E2F2, TFAM, MAMLD1, ZFP143	483	624	22680	1.65552	0.999593	0.641801	0.632856
UP_KEYWORDS	DNA-binding	45	8.45865	0.0491303	ZFP488, CHD7, KMT2B, AHR, PRDM1, TTF2, MYSM1, ELK3, H1FOO, NKRF, ZKSCAN6, PCBP1, HIST1H3F, ZFP120, HIVEP1, E2F2, TRIM27, SOX9, GM4881, BEND5, NKX3-2, TMPO, ZFP143, KLF10, IRX2, TCF7L1, HIST1H2AN, NR1H2, PDX1, CDC5L, H2AFV, MTERF1A, PRM3, USF1, POU5F2, CREB3, NEIL3, H1F0, CENPC1, SNAI1, ERF, TFAM, NABP1, RNPS1, ZFP112	483	1604	22680	1.31736	0.999999	0.829436	0.817876
GOTERM_MF_DIRECT	GO:0003677~DNA binding	51	9.58647	0.0624289	ZFP488, LDB1, CHD7, TTF2, AHR, PRDM1, MYSM1, ELK3, H1FOO, NKRF, ZFP120, TRIM27, SOX9, NKX3-2, TMPO, KLF10, HIST1H2AN, SPHK1, H2AFV, HDGFRP2, PRM3, POU5F2, CREB3, NEIL3, CENPC1, ERF, TFAM, KMT2B, ZKSCAN6, PCBP1, POLD2, HIVEP1, HIST1H3F, E2F2, BEND5, ZFP143, IRX2, TCF7L1, GM10674, NR1H2, PDX1, CDC5L, MTERF1A, USF1, CDK9, H1F0, BCL3, SNAI1, NABP1, RNPS1, ZFP112	381	1847	17446	1.26437	1	1	1
Annotation Cluster 2	Enrichment Score: 1.541937459946962
Category	Term	Count	%	PValue	Genes	List Total	Pop Hits	Pop Total	Fold Enrichment	Bonferroni	Benjamini	FDR
UP_SEQ_FEATURE	repeat:ANK 7	6	1.12782	0.00617694	ANKRD16, ESPNL, BCL3, ANKEF1, ASB3, RAI14	399	53	18012	5.11051	0.999258	1	1
UP_SEQ_FEATURE	repeat:ANK 6	7	1.31579	0.00756196	ANKRD16, HACE1, ESPNL, BCL3, ANKEF1, ASB3, RAI14	399	78	18012	4.05128	0.999853	1	1
UP_SEQ_FEATURE	repeat:ANK 4	8	1.50376	0.0227729	ANKRD16, HACE1, ESPNL, ANKRD23, BCL3, ANKEF1, ASB3, RAI14	399	127	18012	2.84364	1	1	1
UP_SEQ_FEATURE	repeat:ANK 3	9	1.69173	0.0260031	ANKRD16, HACE1, ESPNL, TRPV4, ANKRD23, BCL3, ANKEF1, ASB3, RAI14	399	160	18012	2.53929	1	1	1
UP_SEQ_FEATURE	repeat:ANK 1	10	1.8797	0.0280078	ANKRD13B, ANKRD16, HACE1, ESPNL, TRPV4, ANKRD23, BCL3, ANKEF1, ASB3, RAI14	399	193	18012	2.33901	1	1	1
UP_SEQ_FEATURE	repeat:ANK 2	10	1.8797	0.0280078	ANKRD13B, ANKRD16, HACE1, ESPNL, TRPV4, ANKRD23, BCL3, ANKEF1, ASB3, RAI14	399	193	18012	2.33901	1	1	1
SMART	SM00248:ANK	11	2.06767	0.0312685	ANKRD13B, ANKRD16, HACE1, ESPNL, TRPV4, ANKRD23, BCL3, GM15319, ANKEF1, ASB3, RAI14	236	225	10425	2.1596	0.998085	1	1
INTERPRO	IPR002110:Ankyrin repeat	11	2.06767	0.0319251	ANKRD13B, ANKRD16, HACE1, ESPNL, TRPV4, ANKRD23, BCL3, GM15319, ANKEF1, ASB3, RAI14	451	232	20594	2.16505	1	1	1
UP_SEQ_FEATURE	repeat:ANK 5	7	1.31579	0.0326846	ANKRD16, HACE1, ESPNL, BCL3, ANKEF1, ASB3, RAI14	399	108	18012	2.92593	1	1	1
UP_KEYWORDS	ANK repeat	11	2.06767	0.0332104	ANKRD13B, ANKRD16, HACE1, ESPNL, TRPV4, ANKRD23, BCL3, GM15319, ANKEF1, ASB3, RAI14	483	240	22680	2.15217	0.999938	0.715037	0.705072
INTERPRO	IPR020683:Ankyrin repeat-containing domain	11	2.06767	0.0407174	ANKRD13B, ANKRD16, HACE1, ESPNL, TRPV4, ANKRD23, BCL3, GM15319, ANKEF1, ASB3, RAI14	451	242	20594	2.07559	1	1	1
UP_SEQ_FEATURE	repeat:ANK 8	4	0.75188	0.0545066	ANKRD16, ESPNL, ANKEF1, ASB3	399	39	18012	4.63004	1	1	1
UP_SEQ_FEATURE	repeat:ANK 9	3	0.56391	0.172709	ANKRD16, ESPNL, ASB3	399	34	18012	3.98319	1	1	1
Annotation Cluster 3	Enrichment Score: 1.4969429824192344
Category	Term	Count	%	PValue	Genes	List Total	Pop Hits	Pop Total	Fold Enrichment	Bonferroni	Benjamini	FDR
UP_KEYWORDS	Mitochondrion	34	6.39098	0.0179301	SLC35F6, ND6, STOML2, NDUFA13, ECHS1, ACSM3, ATP8, TAMM41, NDUFB5, ECI2, HTRA2, MRPL39, ATP5H, MRPL11, SNN, SERAC1, SLC25A23, MPST, NDUFA8, TRAP1, PTCD2, UQCC1, TOMM34, MRPL49, MTERF1A, MRPL21, SLC25A19, NDUFAF5, TFAM, UBA1, 1110008L16RIK, ALDH7A1, SLC25A13, ND4	483	1058	22680	1.509	0.994443	0.532844	0.525418
UP_KEYWORDS	Mitochondrion inner membrane	12	2.25564	0.0204226	NDUFA8, TRAP1, STOML2, NDUFA13, SLC25A19, TAMM41, NDUFB5, UQCC1, NDUFAF5, ATP5H, SLC25A23, SLC25A13	483	254	22680	2.21842	0.99732	0.532844	0.525418
GOTERM_CC_DIRECT	GO:0005743~mitochondrial inner membrane	14	2.63158	0.0882018	MPST, TRAP1, NDUFA8, STOML2, NDUFA13, CNP, TAMM41, NDUFB5, UQCC1, ATP5H, SLC25A19, NDUFAF5, SLC25A23, SLC25A13	435	387	19662	1.63514	1	1	1
Annotation Cluster 4	Enrichment Score: 1.413778447147934
Category	Term	Count	%	PValue	Genes	List Total	Pop Hits	Pop Total	Fold Enrichment	Bonferroni	Benjamini	FDR
GOTERM_MF_DIRECT	GO:0015226~carnitine transmembrane transporter activity	3	0.56391	0.0027579	SLC22A5, SLC22A16, SLC22A21	381	4	17446	34.3425	0.783462	0.509293	0.509293
GOTERM_BP_DIRECT	GO:0015879~carnitine transport	3	0.56391	0.00476208	SLC22A5, SLC22A16, SLC22A21	405	5	18082	26.7881	0.999907	1	1
GOTERM_MF_DIRECT	GO:0022857~transmembrane transporter activity	4	0.75188	0.0783707	SLC22A5, SLC22A16, SLC18B1, SLC22A21	381	46	17446	3.98174	1	1	1
INTERPRO	IPR005828:General substrate transporter	3	0.56391	0.209405	SLC22A5, SLC22A16, SLC22A21	451	39	20594	3.51254	1	1	1
INTERPRO	IPR020846:Major facilitator superfamily domain	5	0.93985	0.395906	SLC46A1, SLC22A5, SLC22A16, SLC18B1, SLC22A21	451	146	20594	1.5638	1	1	1
Annotation Cluster 5	Enrichment Score: 1.2349637552728532
Category	Term	Count	%	PValue	Genes	List Total	Pop Hits	Pop Total	Fold Enrichment	Bonferroni	Benjamini	FDR
UP_SEQ_FEATURE	domain:FHA	4	0.75188	0.0233032	PHLDB1, CHEK2, CEP170B, KIF1A	399	28	18012	6.44898	1	1	1
INTERPRO	IPR000253:Forkhead-associated (FHA) domain	4	0.75188	0.0465676	PHLDB1, CHEK2, CEP170B, KIF1A	451	37	20594	4.93654	1	1	1
SMART	SM00240:FHA	3	0.56391	0.101028	CHEK2, CEP170B, KIF1A	236	24	10425	5.52172	1	1	1
INTERPRO	IPR008984:SMAD/FHA domain	4	0.75188	0.104762	PHLDB1, CHEK2, CEP170B, KIF1A	451	52	20594	3.51254	1	1	1
Annotation Cluster 6	Enrichment Score: 1.2095459636380874
Category	Term	Count	%	PValue	Genes	List Total	Pop Hits	Pop Total	Fold Enrichment	Bonferroni	Benjamini	FDR
GOTERM_CC_DIRECT	GO:0030054~cell junction	27	5.07519	0.00953436	ITGB1, NLGN3, CHRM2, FOCAD, FLII, CLSTN1, FBF1, SCAMP5, RUSC1, 2610301B20RIK, TNS2, CDK5RAP2, MPST, ANXA2, WTIP, TMEM230, GRIN2D, GAK, ENAH, P2RX4, 4930486L24RIK, TRPV4, CDHR2, FSCN1, ARHGEF5, BCAR1, CBLN1	435	718	19662	1.69972	0.974746	0.610199	0.60861
UP_KEYWORDS	Cell junction	22	4.13534	0.0456021	NLGN3, MPST, CHRM2, ITGB1, FOCAD, FLII, FBF1, CLSTN1, WTIP, TMEM230, GRIN2D, SCAMP5, ENAH, GAK, RUSC1, TRPV4, CDHR2, FSCN1, TNS2, ARHGEF5, BCAR1, CBLN1	483	661	22680	1.56285	0.999998	0.817988	0.806587
GOTERM_CC_DIRECT	GO:0045202~synapse	17	3.19549	0.0960864	NLGN3, MPST, CHRM2, ITGB1, ADGRV1, CTNND1, CLSTN1, TMEM230, GRIN2D, SCAMP5, ENAH, CD24A, P2RX4, RUSC1, CPEB2, HCN2, CBLN1	435	505	19662	1.52158	1	1	1
UP_KEYWORDS	Synapse	10	1.8797	0.347438	NLGN3, CHRM2, SCAMP5, ENAH, MPST, RUSC1, CLSTN1, TMEM230, CBLN1, GRIN2D	483	357	22680	1.31531	1	1	0.98951
Annotation Cluster 7	Enrichment Score: 1.197854669924533
Category	Term	Count	%	PValue	Genes	List Total	Pop Hits	Pop Total	Fold Enrichment	Bonferroni	Benjamini	FDR
UP_SEQ_FEATURE	region of interest:S-adenosyl-L-methionine binding	4	0.75188	0.0255764	COMTD1, METTL1, NSUN2, KMT2B	399	29	18012	6.2266	1	1	1
GOTERM_MF_DIRECT	GO:0008168~methyltransferase activity	9	1.69173	0.031037	METTL7A1, COMTD1, METTL24, METTL1, NSUN2, METTL2, KMT2B, NDUFAF5, PRDM1	381	168	17446	2.45304	1	1	1
UP_KEYWORDS	Methyltransferase	9	1.69173	0.0348799	METTL7A1, COMTD1, METTL24, METTL1, NSUN2, METTL2, KMT2B, NDUFAF5, PRDM1	483	176	22680	2.40119	0.999962	0.715037	0.705072
GOTERM_BP_DIRECT	GO:0032259~methylation	9	1.69173	0.0363615	METTL7A1, COMTD1, METTL24, METTL1, NSUN2, METTL2, KMT2B, NDUFAF5, PRDM1	405	169	18082	2.37765	1	1	1
UP_KEYWORDS	S-adenosyl-L-methionine	6	1.12782	0.246296	COMTD1, METTL1, NSUN2, METTL2, KMT2B, PRDM1	483	158	22680	1.78316	1	1	0.98951
UP_SEQ_FEATURE	binding site:S-adenosyl-L-methionine	3	0.56391	0.262106	COMTD1, NSUN2, KMT2B	399	45	18012	3.00952	1	1	1
Annotation Cluster 8	Enrichment Score: 1.1881205564256097
Category	Term	Count	%	PValue	Genes	List Total	Pop Hits	Pop Total	Fold Enrichment	Bonferroni	Benjamini	FDR
GOTERM_MF_DIRECT	GO:0050839~cell adhesion molecule binding	6	1.12782	0.0192478	NLGN3, ITGB1, POSTN, GLYCAM1, CDHR2, CTNND1	381	71	17446	3.86958	0.999979	1	1
UP_KEYWORDS	Cell adhesion	15	2.81955	0.112995	NLGN3, ITGB1, POSTN, TNFRSF12A, GLYCAM1, CTNND1, CLSTN1, PCDHB20, RHOB, PCDHB19, COL6A1, CDHR2, SVEP1, CD44, BCAR1	483	459	22680	1.53453	1	1	0.98951
GOTERM_BP_DIRECT	GO:0007155~cell adhesion	16	3.00752	0.125371	NLGN3, ITGB1, POSTN, TNFRSF12A, GLYCAM1, CTNND1, SDC3, CLSTN1, RHOB, CD24A, COL5A1, COL6A1, CDHR2, SVEP1, CD44, BCAR1	405	485	18082	1.47289	1	1	1
Annotation Cluster 9	Enrichment Score: 1.1780469535204299
Category	Term	Count	%	PValue	Genes	List Total	Pop Hits	Pop Total	Fold Enrichment	Bonferroni	Benjamini	FDR
INTERPRO	IPR003309:Transcription regulator SCAN	4	0.75188	0.0635964	ZKSCAN6, SCAND1, MZF1, ZFP397	451	42	20594	4.34885	1	1	1
INTERPRO	IPR008916:Retrovirus capsid, C-terminal	4	0.75188	0.0673028	ZKSCAN6, SCAND1, MZF1, ZFP397	451	43	20594	4.24772	1	1	1
SMART	SM00431:SCAN	4	0.75188	0.0682957	ZKSCAN6, SCAND1, MZF1, ZFP397	236	42	10425	4.20702	0.999999	1	1
Annotation Cluster 10	Enrichment Score: 1.0110488568057785
Category	Term	Count	%	PValue	Genes	List Total	Pop Hits	Pop Total	Fold Enrichment	Bonferroni	Benjamini	FDR
KEGG_PATHWAY	mmu05012:Parkinson's disease	10	1.8797	0.00586413	NDUFA8, ND6, NDUFA13, ATP8, NDUFB5, HTRA2, UBA1, UBE2G2, ATP5H, ND4	172	149	7691	3.00101	0.724185	1	1
GOTERM_MF_DIRECT	GO:0008137~NADH dehydrogenase (ubiquinone) activity	4	0.75188	0.0401399	NDUFA8, ND6, NDUFA13, ND4	381	35	17446	5.23315	1	1	1
UP_KEYWORDS	Respiratory chain	5	0.93985	0.0427977	NDUFA8, ND6, NDUFA13, NDUFB5, ND4	483	62	22680	3.78682	0.999996	0.817988	0.806587
GOTERM_CC_DIRECT	GO:0005747~mitochondrial respiratory chain complex I	4	0.75188	0.0850227	NDUFA8, NDUFA13, NDUFB5, ND4	435	47	19662	3.84681	1	1	1
KEGG_PATHWAY	mmu00190:Oxidative phosphorylation	7	1.31579	0.0891452	NDUFA8, ND6, NDUFA13, ATP8, NDUFB5, ATP5H, ND4	172	139	7691	2.25184	1	1	1
UP_KEYWORDS	Ubiquinone	3	0.56391	0.0981552	ND6, NDUFB5, ND4	483	25	22680	5.63478	1	1	0.98951
GOTERM_CC_DIRECT	GO:0070469~respiratory chain	4	0.75188	0.136258	NDUFA8, ND6, NDUFB5, ND4	435	58	19662	3.11724	1	1	1
UP_KEYWORDS	Electron transport	5	0.93985	0.193436	NDUFA8, ND6, NDUFA13, NDUFB5, ND4	483	107	22680	2.19423	1	1	0.98951
KEGG_PATHWAY	mmu05010:Alzheimer's disease	7	1.31579	0.200962	NDUFA8, NDUFA13, NCSTN, ATP8, NDUFB5, ATP5H, GRIN2D	172	177	7691	1.76839	1	1	1
KEGG_PATHWAY	mmu05016:Huntington's disease	7	1.31579	0.278639	CREB3, NDUFA8, NDUFA13, ATP8, NDUFB5, TFAM, ATP5H	172	198	7691	1.58084	1	1	1
KEGG_PATHWAY	mmu04932:Non-alcoholic fatty liver disease (NAFLD)	4	0.75188	0.683378	NDUFA8, NDUFA13, NDUFB5, AKT1	172	157	7691	1.13924	1	1	1
Annotation Cluster 11	Enrichment Score: 0.9728205785912747
Category	Term	Count	%	PValue	Genes	List Total	Pop Hits	Pop Total	Fold Enrichment	Bonferroni	Benjamini	FDR
GOTERM_MF_DIRECT	GO:0016491~oxidoreductase activity	20	3.7594	0.0707165	TSTA3, KDM4A, ND6, GPX2, AKR1E1, GSTO2, ATP8, SRD5A3, DHDH, CHM, HMGCR, SOD3, ALDH1A3, DHRS7, LDHA, SESN3, ALDH7A1, PIGF, ACAD10, ND4	381	604	17446	1.51623	1	1	1
GOTERM_BP_DIRECT	GO:0055114~oxidation-reduction process	21	3.94737	0.124128	TSTA3, KDM4A, NDUFA8, ND6, GPX2, AKR1E1, GSTO2, NDUFB5, SRD5A3, DHDH, HSD17B14, CHM, HMGCR, SOD3, ALDH1A3, DHRS7, LDHA, SESN3, ALDH7A1, ACAD10, ND4	405	676	18082	1.38696	1	1	1
UP_KEYWORDS	Oxidoreductase	19	3.57143	0.137451	TSTA3, KDM4A, ND6, GPX2, AKR1E1, GSTO2, ATP8, SRD5A3, DHDH, HMGCR, SOD3, ALDH1A3, DHRS7, LDHA, SESN3, NDUFAF5, ALDH7A1, ACAD10, ND4	483	639	22680	1.3962	1	1	0.98951
Annotation Cluster 12	Enrichment Score: 0.9603892423630752
Category	Term	Count	%	PValue	Genes	List Total	Pop Hits	Pop Total	Fold Enrichment	Bonferroni	Benjamini	FDR
GOTERM_CC_DIRECT	GO:0005681~spliceosomal complex	10	1.8797	0.00325522	SF3B4, SF3A3, HNRNPH1, ALYREF, DHX35, CDC5L, ZCRB1, TTF2, ALYREF2, LSM2	435	136	19662	3.32353	0.71408	0.416668	0.415583
UP_KEYWORDS	Spliceosome	9	1.69173	0.00355733	SF3B4, SF3A3, HNRNPH1, ALYREF, CDC5L, ZCRB1, TTF2, ALYREF2, LSM2	483	117	22680	3.61204	0.640404	0.14585	0.143818
GOTERM_MF_DIRECT	GO:0003723~RNA binding	26	4.88722	0.0352949	SF3B4, CNP, MRPL39, TARS, DDX60, RPS15, PCBP1, RBM7, ALYREF2, RBM12B2, N4BP1, SF3A3, METTL1, NSUN2, ALYREF, CDC5L, EIF2AK2, ZCRB1, MRPL21, LSM2, HNRNPH1, NABP1, RNPS1, EIF4E2, CPEB2, TLR3	381	780	17446	1.52633	1	1	1
UP_KEYWORDS	mRNA splicing	10	1.8797	0.0716611	SF3B4, SF3A3, HNRNPH1, ALYREF, CDC5L, RNPS1, ZCRB1, TTF2, ALYREF2, LSM2	483	240	22680	1.95652	1	1	0.98951
KEGG_PATHWAY	mmu03040:Spliceosome	7	1.31579	0.0756573	SF3B4, SF3A3, ALYREF, PCBP1, CDC5L, ALYREF2, LSM2	172	133	7691	2.35343	1	1	1
GOTERM_BP_DIRECT	GO:0008380~RNA splicing	10	1.8797	0.0923534	SF3B4, SF3A3, HNRNPH1, ALYREF, CDC5L, RNPS1, ZCRB1, TTF2, ALYREF2, LSM2	405	241	18082	1.85257	1	1	1
GOTERM_BP_DIRECT	GO:0006397~mRNA processing	12	2.25564	0.108372	SF3B4, SF3A3, PTCD2, HNRNPH1, ALYREF, PCBP1, CDC5L, RNPS1, ZCRB1, TTF2, ALYREF2, LSM2	405	322	18082	1.66386	1	1	1
UP_KEYWORDS	mRNA processing	11	2.06767	0.120943	SF3B4, SF3A3, PTCD2, HNRNPH1, ALYREF, CDC5L, RNPS1, ZCRB1, TTF2, ALYREF2, LSM2	483	307	22680	1.68248	1	1	0.98951
UP_KEYWORDS	RNA-binding	18	3.38346	0.143865	SF3B4, CNP, METTL1, ALYREF, NSUN2, EIF2AK2, CDC5L, ZCRB1, LSM2, HNRNPH1, PCBP1, RNPS1, RBM7, RBM12B2, ALYREF2, EIF4E2, CPEB2, TLR3	483	601	22680	1.40635	1	1	0.98951
SMART	SM00360:RRM	9	1.69173	0.146174	SF3B4, HNRNPH1, ALYREF, RNPS1, ZCRB1, RBM7, RBM12B2, ALYREF2, CPEB2	236	229	10425	1.73609	1	1	1
INTERPRO	IPR000504:RNA recognition motif domain	9	1.69173	0.158947	SF3B4, HNRNPH1, ALYREF, RNPS1, ZCRB1, RBM7, RBM12B2, ALYREF2, CPEB2	451	241	20594	1.70526	1	1	1
GOTERM_CC_DIRECT	GO:0071013~catalytic step 2 spliceosome	5	0.93985	0.162649	SF3A3, HNRNPH1, DHX35, CDC5L, LSM2	435	96	19662	2.35417	1	1	1
INTERPRO	IPR012677:Nucleotide-binding, alpha-beta plait	10	1.8797	0.1639	SF3B4, GM4832, HNRNPH1, ALYREF, RNPS1, ZCRB1, RBM7, RBM12B2, ALYREF2, CPEB2	451	281	20594	1.62502	1	1	1
UP_SEQ_FEATURE	domain:RRM	5	0.93985	0.254614	ALYREF, RNPS1, ZCRB1, RBM7, ALYREF2	399	116	18012	1.94581	1	1	1
GOTERM_BP_DIRECT	GO:0000398~mRNA splicing, via spliceosome	4	0.75188	0.458637	SF3A3, CDC5L, ZCRB1, LSM2	405	112	18082	1.59453	1	1	1
UP_SEQ_FEATURE	domain:RRM 1	4	0.75188	0.540151	SF3B4, HNRNPH1, RBM12B2, CPEB2	399	128	18012	1.41071	1	1	1
UP_SEQ_FEATURE	domain:RRM 2	4	0.75188	0.540151	SF3B4, HNRNPH1, RBM12B2, CPEB2	399	128	18012	1.41071	1	1	1
KEGG_PATHWAY	mmu03015:mRNA surveillance pathway	3	0.56391	0.634164	ALYREF, RNPS1, ALYREF2	172	96	7691	1.39735	1	1	1
Annotation Cluster 13	Enrichment Score: 0.9602925425767623
Category	Term	Count	%	PValue	Genes	List Total	Pop Hits	Pop Total	Fold Enrichment	Bonferroni	Benjamini	FDR
KEGG_PATHWAY	mmu04015:Rap1 signaling pathway	11	2.06767	0.0208087	ITGB1, EFNA2, FGF9, CTNND1, P2RY1, FGF18, AKT1, FGF13, SIPA1L2, RALGDS, BCAR1	172	214	7691	2.29844	0.99	1	1
KEGG_PATHWAY	mmu04151:PI3K-Akt signaling pathway	12	2.25564	0.157882	CHRM2, ITGB1, CREB3, EFNA2, FGF9, COL5A1, COL5A3, COL6A1, FGF18, AKT1, FGF13, EIF4E2	172	351	7691	1.52872	1	1	1
KEGG_PATHWAY	mmu04014:Ras signaling pathway	7	1.31579	0.400445	PLA2G12A, EFNA2, FGF9, FGF18, AKT1, FGF13, RALGDS	172	229	7691	1.36684	1	1	1
Annotation Cluster 14	Enrichment Score: 0.9417449254053775
Category	Term	Count	%	PValue	Genes	List Total	Pop Hits	Pop Total	Fold Enrichment	Bonferroni	Benjamini	FDR
UP_KEYWORDS	Mitochondrion	34	6.39098	0.0179301	SLC35F6, ND6, STOML2, NDUFA13, ECHS1, ACSM3, ATP8, TAMM41, NDUFB5, ECI2, HTRA2, MRPL39, ATP5H, MRPL11, SNN, SERAC1, SLC25A23, MPST, NDUFA8, TRAP1, PTCD2, UQCC1, TOMM34, MRPL49, MTERF1A, MRPL21, SLC25A19, NDUFAF5, TFAM, UBA1, 1110008L16RIK, ALDH7A1, SLC25A13, ND4	483	1058	22680	1.509	0.994443	0.532844	0.525418
UP_KEYWORDS	Transit peptide	15	2.81955	0.199863	TRAP1, STOML2, ECHS1, ACSM3, TAMM41, NDUFB5, ECI2, HTRA2, MTERF1A, MRPL21, MRPL11, NDUFAF5, TFAM, 1110008L16RIK, ALDH7A1	483	510	22680	1.38107	1	1	0.98951
UP_SEQ_FEATURE	transit peptide:Mitochondrion	13	2.44361	0.417302	TRAP1, ECHS1, ACSM3, TAMM41, NDUFB5, ECI2, HTRA2, MTERF1A, MRPL21, MRPL11, NDUFAF5, TFAM, 1110008L16RIK	399	496	18012	1.18318	1	1	1
Annotation Cluster 15	Enrichment Score: 0.9140969756793459
Category	Term	Count	%	PValue	Genes	List Total	Pop Hits	Pop Total	Fold Enrichment	Bonferroni	Benjamini	FDR
INTERPRO	IPR000418:Ets domain	3	0.56391	0.117008	ERF, GM4881, ELK3	451	27	20594	5.07366	1	1	1
SMART	SM00413:ETS	3	0.56391	0.123065	ERF, GM4881, ELK3	236	27	10425	4.90819	1	1	1
INTERPRO	IPR011991:Winged helix-turn-helix DNA-binding domain	9	1.69173	0.125707	H1FOO, H1F0, CUL3, ERF, E2F2, MYSM1, GM4881, ELK3, ANAPC2	451	227	20594	1.81043	1	1	1
Annotation Cluster 16	Enrichment Score: 0.9039068802681719
Category	Term	Count	%	PValue	Genes	List Total	Pop Hits	Pop Total	Fold Enrichment	Bonferroni	Benjamini	FDR
GOTERM_BP_DIRECT	GO:0006874~cellular calcium ion homeostasis	9	1.69173	0.00180105	ITGB1, STOML2, CACNB4, TRPV4, CLSTN1, ATP13A2, S100B, HERPUD1, SLC8A2	405	100	18082	4.01822	0.969935	1	1
GOTERM_BP_DIRECT	GO:0006816~calcium ion transport	5	0.93985	0.386888	P2RX4, CACNB4, TRPV4, CORO1A, SLC8A2	405	141	18082	1.58322	1	1	1
GOTERM_BP_DIRECT	GO:0070588~calcium ion transmembrane transport	3	0.56391	0.588401	CACNB4, TRPV4, SLC8A2	405	88	18082	1.52205	1	1	1
UP_KEYWORDS	Calcium transport	3	0.56391	0.590999	CACNB4, TRPV4, SLC8A2	483	93	22680	1.51473	1	1	0.98951
Annotation Cluster 17	Enrichment Score: 0.8976714153531937
Category	Term	Count	%	PValue	Genes	List Total	Pop Hits	Pop Total	Fold Enrichment	Bonferroni	Benjamini	FDR
INTERPRO	IPR012336:Thioredoxin-like fold	7	1.31579	0.0782107	GPX2, CLIC3, GSTO2, SELM, FAXC, GDAP1L1, TXNDC16	451	136	20594	2.3503	1	1	1
INTERPRO	IPR010987:Glutathione S-transferase, C-terminal-like	4	0.75188	0.078992	CLIC3, GSTO2, FAXC, GDAP1L1	451	46	20594	3.97069	1	1	1
UP_SEQ_FEATURE	domain:GST N-terminal	3	0.56391	0.141596	CLIC3, GSTO2, GDAP1L1	399	30	18012	4.51429	1	1	1
INTERPRO	IPR004045:Glutathione S-transferase, N-terminal	3	0.56391	0.161975	CLIC3, GSTO2, GDAP1L1	451	33	20594	4.15118	1	1	1
UP_SEQ_FEATURE	domain:GST C-terminal	3	0.56391	0.229243	CLIC3, GSTO2, GDAP1L1	399	41	18012	3.30314	1	1	1
Annotation Cluster 18	Enrichment Score: 0.88880095246842
Category	Term	Count	%	PValue	Genes	List Total	Pop Hits	Pop Total	Fold Enrichment	Bonferroni	Benjamini	FDR
GOTERM_CC_DIRECT	GO:0005769~early endosome	11	2.06767	0.0290036	ANKRD13B, FGD5, ANXA2, RUSC1, RAB34, TOM1, CORO1A, RHOD, TMEM230, TLR3, RHOB	435	226	19662	2.2	0.999988	1	1
UP_KEYWORDS	Endosome	13	2.44361	0.234729	ITGB1, ANKRD13B, RHOD, TMEM230, RHOB, LAMP5, SCAMP5, ZFYVE28, FGD5, RUSC1, TRIM27, FOLR1, TLR3	483	443	22680	1.37796	1	1	0.98951
GOTERM_CC_DIRECT	GO:0005768~endosome	15	2.81955	0.316649	ITGB1, ANKRD13B, ANXA2, RHOD, TMEM230, RHOB, LAMP5, SCAMP5, ZFYVE28, FGD5, RUSC1, TOM1, TRIM27, FOLR1, TLR3	435	544	19662	1.24632	1	1	1
Annotation Cluster 19	Enrichment Score: 0.8158252633818958
Category	Term	Count	%	PValue	Genes	List Total	Pop Hits	Pop Total	Fold Enrichment	Bonferroni	Benjamini	FDR
GOTERM_BP_DIRECT	GO:0030036~actin cytoskeleton organization	7	1.31579	0.0991765	SPTA1, ENAH, FLII, FSCN1, CORO1A, ARHGEF5, BCAR1	405	142	18082	2.2009	1	1	1
GOTERM_MF_DIRECT	GO:0003779~actin binding	12	2.25564	0.121842	SPTA1, ENAH, ITGB1, RUSC1, TRPV4, FLII, HPCA, WIPF3, FSCN1, PPP1R42, CORO1A, ABRA	381	338	17446	1.62568	1	1	1
GOTERM_CC_DIRECT	GO:0030027~lamellipodium	7	1.31579	0.155673	ENAH, ITGB1, TRPV4, CTNND1, FSCN1, CORO1A, BCAR1	435	164	19662	1.92927	1	1	1
UP_KEYWORDS	Actin-binding	8	1.50376	0.289922	SPTA1, ENAH, FLII, WIPF3, FSCN1, PHACTR2, CORO1A, ABRA	483	252	22680	1.49068	1	1	0.98951
Annotation Cluster 20	Enrichment Score: 0.7626187010027172
Category	Term	Count	%	PValue	Genes	List Total	Pop Hits	Pop Total	Fold Enrichment	Bonferroni	Benjamini	FDR
GOTERM_BP_DIRECT	GO:0030968~endoplasmic reticulum unfolded protein response	4	0.75188	0.0917682	CREB3, EIF2AK2, PARP16, HERPUD1	405	48	18082	3.72058	1	1	1
UP_KEYWORDS	Unfolded protein response	3	0.56391	0.17772	CREB3, PARP16, HERPUD1	483	36	22680	3.91304	1	1	0.98951
GOTERM_BP_DIRECT	GO:0006986~response to unfolded protein	3	0.56391	0.316021	CREB3, PARP16, HERPUD1	405	51	18082	2.62629	1	1	1
Annotation Cluster 21	Enrichment Score: 0.7441988202499797
Category	Term	Count	%	PValue	Genes	List Total	Pop Hits	Pop Total	Fold Enrichment	Bonferroni	Benjamini	FDR
KEGG_PATHWAY	mmu05218:Melanoma	5	0.93985	0.072825	FGF9, FGF18, E2F2, AKT1, FGF13	172	71	7691	3.14895	1	1	1
INTERPRO	IPR002209:Heparin-binding growth factor/Fibroblast growth factor	3	0.56391	0.0825919	FGF9, FGF18, FGF13	451	22	20594	6.22677	1	1	1
SMART	SM00442:FGF	3	0.56391	0.0870327	FGF9, FGF18, FGF13	236	22	10425	6.02369	1	1	1
INTERPRO	IPR008996:Cytokine, IL-1-like	3	0.56391	0.154269	FGF9, FGF18, FGF13	451	32	20594	4.2809	1	1	1
GOTERM_MF_DIRECT	GO:0008083~growth factor activity	6	1.12782	0.209713	GPI1, FGF9, CLEC11A, FGF18, TIMP1, FGF13	381	145	17446	1.89476	1	1	1
KEGG_PATHWAY	mmu04810:Regulation of actin cytoskeleton	7	1.31579	0.336538	CHRM2, ENAH, ITGB1, FGF9, FGF18, FGF13, BCAR1	172	213	7691	1.46951	1	1	1
KEGG_PATHWAY	mmu04014:Ras signaling pathway	7	1.31579	0.400445	PLA2G12A, EFNA2, FGF9, FGF18, AKT1, FGF13, RALGDS	172	229	7691	1.36684	1	1	1
KEGG_PATHWAY	mmu04010:MAPK signaling pathway	7	1.31579	0.487559	CACNB4, FGF9, FGF18, AKT1, FGF13, DUSP6, MAP2K5	172	251	7691	1.24704	1	1	1
Annotation Cluster 22	Enrichment Score: 0.738239022326034
Category	Term	Count	%	PValue	Genes	List Total	Pop Hits	Pop Total	Fold Enrichment	Bonferroni	Benjamini	FDR
GOTERM_BP_DIRECT	GO:0007015~actin filament organization	6	1.12782	0.0382364	MAD2L2, ENAH, TRPV4, FSCN1, CORO1A, BCAR1	405	83	18082	3.22749	1	1	1
GOTERM_CC_DIRECT	GO:0030175~filopodium	5	0.93985	0.0905639	ENAH, ITGB1, TRPV4, FSCN1, FGF13	435	77	19662	2.93506	1	1	1
GOTERM_CC_DIRECT	GO:0030027~lamellipodium	7	1.31579	0.155673	ENAH, ITGB1, TRPV4, CTNND1, FSCN1, CORO1A, BCAR1	435	164	19662	1.92927	1	1	1
GOTERM_MF_DIRECT	GO:0051015~actin filament binding	4	0.75188	0.551279	TRPV4, WIPF3, FSCN1, CORO1A	381	132	17446	1.38758	1	1	1
GOTERM_CC_DIRECT	GO:0030426~growth cone	4	0.75188	0.685151	TRPV4, CTNND1, FSCN1, FGF13	435	159	19662	1.13711	1	1	1
Annotation Cluster 23	Enrichment Score: 0.7260638368539558
Category	Term	Count	%	PValue	Genes	List Total	Pop Hits	Pop Total	Fold Enrichment	Bonferroni	Benjamini	FDR
GOTERM_CC_DIRECT	GO:0005762~mitochondrial large ribosomal subunit	4	0.75188	0.0477325	MRPL49, MRPL39, MRPL21, MRPL11	435	37	19662	4.88649	1	1	1
GOTERM_BP_DIRECT	GO:0006412~translation	15	2.81955	0.0678979	MRPL49, MRPL39, EIF2AK2, TARS, MRPL21, MRPL11, RPS15, GM4832, SLC25A19, AKT1, EIF4E2, RPS27A, SLC25A23, EIF1B, SLC25A13	405	401	18082	1.67008	1	1	1
GOTERM_MF_DIRECT	GO:0003735~structural constituent of ribosome	10	1.8797	0.124106	RPS15, GM4832, SLC25A19, MRPL49, MRPL39, RPS27A, SLC25A23, MRPL21, MRPL11, SLC25A13	381	264	17446	1.73447	1	1	1
UP_KEYWORDS	Ribonucleoprotein	10	1.8797	0.21627	RPS15, HNRNPH1, MVP, PCBP1, MRPL49, MRPL39, RPS27A, MRPL21, MRPL11, LSM2	483	308	22680	1.52456	1	1	0.98951
GOTERM_CC_DIRECT	GO:0005840~ribosome	7	1.31579	0.236448	RPS15, GM4832, MRPL49, MRPL39, RPS27A, MRPL21, MRPL11	435	188	19662	1.68298	1	1	1
GOTERM_CC_DIRECT	GO:0030529~intracellular ribonucleoprotein complex	10	1.8797	0.276664	RPS15, HNRNPH1, MVP, PCBP1, MRPL49, MRPL39, RPS27A, MRPL21, MRPL11, LSM2	435	320	19662	1.4125	1	1	1
UP_KEYWORDS	Ribosomal protein	6	1.12782	0.433309	RPS15, MRPL49, MRPL39, RPS27A, MRPL21, MRPL11	483	203	22680	1.38788	1	1	0.98951
KEGG_PATHWAY	mmu03010:Ribosome	4	0.75188	0.630299	RPS15, RPS27A, MRPL21, MRPL11	172	145	7691	1.23352	1	1	1
Annotation Cluster 24	Enrichment Score: 0.6879066742403939
Category	Term	Count	%	PValue	Genes	List Total	Pop Hits	Pop Total	Fold Enrichment	Bonferroni	Benjamini	FDR
GOTERM_BP_DIRECT	GO:0006974~cellular response to DNA damage stimulus	15	2.81955	0.0899338	STXBP4, XRCC1, CDC5L, SMC1A, SPIDR, CDK9, MAD2L2, NEIL3, CHEK2, SWI5, BCL3, AKT1, NABP1, SUSD6, UBA1	405	420	18082	1.59453	1	1	1
UP_KEYWORDS	DNA repair	9	1.69173	0.243883	CDK9, NEIL3, CHEK2, SWI5, XRCC1, CDC5L, NABP1, SMC1A, SPIDR	483	279	22680	1.51473	1	1	0.98951
GOTERM_BP_DIRECT	GO:0006281~DNA repair	10	1.8797	0.282602	CDK9, INO80E, NEIL3, CHEK2, SWI5, XRCC1, CDC5L, NABP1, SMC1A, SPIDR	405	318	18082	1.40399	1	1	1
UP_KEYWORDS	DNA damage	10	1.8797	0.285821	MAD2L2, CDK9, NEIL3, CHEK2, SWI5, XRCC1, CDC5L, NABP1, SMC1A, SPIDR	483	336	22680	1.39752	1	1	0.98951
Annotation Cluster 25	Enrichment Score: 0.6562342249230924
Category	Term	Count	%	PValue	Genes	List Total	Pop Hits	Pop Total	Fold Enrichment	Bonferroni	Benjamini	FDR
INTERPRO	IPR013320:Concanavalin A-like lectin/glucanase, subgroup	11	2.06767	0.0180577	PTPRT, ADGRV1, TRIM7, COL5A1, COL5A3, CLSTN1, RANBP10, SVEP1, TRIM27, TRIM65, SPSB4	451	211	20594	2.38053	1	1	1
UP_SEQ_FEATURE	domain:B30.2/SPRY	5	0.93985	0.0412882	TRIM7, RANBP10, TRIM27, TRIM65, SPSB4	399	59	18012	3.82567	1	1	1
INTERPRO	IPR003877:SPla/RYanodine receptor SPRY	5	0.93985	0.0880653	TRIM7, RANBP10, TRIM27, TRIM65, SPSB4	451	77	20594	2.96513	1	1	1
SMART	SM00449:SPRY	5	0.93985	0.0888555	TRIM7, RANBP10, TRIM27, TRIM65, SPSB4	236	75	10425	2.94492	1	1	1
INTERPRO	IPR001870:B30.2/SPRY domain	5	0.93985	0.108374	TRIM7, RANBP10, TRIM27, TRIM65, SPSB4	451	83	20594	2.75078	1	1	1
SMART	SM00589:PRY	3	0.56391	0.178069	TRIM7, TRIM27, TRIM65	236	34	10425	3.89768	1	1	1
INTERPRO	IPR006574:SPRY-associated	3	0.56391	0.193408	TRIM7, TRIM27, TRIM65	451	37	20594	3.7024	1	1	1
UP_SEQ_FEATURE	zinc finger region:B box-type	3	0.56391	0.237441	TRIM7, TRIM27, TRIM65	399	42	18012	3.22449	1	1	1
INTERPRO	IPR003879:Butyrophylin-like	3	0.56391	0.354833	TRIM7, TRIM27, TRIM65	451	57	20594	2.40331	1	1	1
INTERPRO	IPR017907:Zinc finger, RING-type, conserved site	4	0.75188	0.694633	TRIM7, TRAF5, TRIM27, TRIM65	451	163	20594	1.12056	1	1	1
INTERPRO	IPR013083:Zinc finger, RING/FYVE/PHD-type	9	1.69173	0.759686	ZFYVE28, KDM4A, FGD5, TRIM7, TRAF5, KMT2B, TRIM27, TAF3, TRIM65	451	445	20594	0.923521	1	1	1
UP_SEQ_FEATURE	zinc finger region:RING-type	4	0.75188	0.782332	TRIM7, TRAF5, TRIM27, TRIM65	399	186	18012	0.970814	1	1	1
SMART	SM00184:RING	4	0.75188	0.901902	TRIM7, TRAF5, TRIM27, TRIM65	236	234	10425	0.755106	1	1	1
INTERPRO	IPR001841:Zinc finger, RING-type	4	0.75188	0.951118	TRIM7, TRAF5, TRIM27, TRIM65	451	286	20594	0.638643	1	1	1
Annotation Cluster 26	Enrichment Score: 0.6540346096469034
Category	Term	Count	%	PValue	Genes	List Total	Pop Hits	Pop Total	Fold Enrichment	Bonferroni	Benjamini	FDR
UP_KEYWORDS	Initiation factor	4	0.75188	0.155079	BRF2, EIF2AK2, EIF4E2, EIF1B	483	64	22680	2.93478	1	1	0.98951
GOTERM_MF_DIRECT	GO:0003743~translation initiation factor activity	4	0.75188	0.184723	BRF2, EIF2AK2, EIF4E2, EIF1B	381	68	17446	2.69353	1	1	1
UP_KEYWORDS	Protein biosynthesis	5	0.93985	0.380909	BRF2, TARS, EIF2AK2, EIF4E2, EIF1B	483	147	22680	1.59716	1	1	0.98951
Annotation Cluster 27	Enrichment Score: 0.6238472309166416
Category	Term	Count	%	PValue	Genes	List Total	Pop Hits	Pop Total	Fold Enrichment	Bonferroni	Benjamini	FDR
KEGG_PATHWAY	mmu05412:Arrhythmogenic right ventricular cardiomyopathy (ARVC)	4	0.75188	0.186517	ITGB1, TCF7L1, CACNB4, SGCA	172	67	7691	2.66956	1	1	1
KEGG_PATHWAY	mmu05410:Hypertrophic cardiomyopathy (HCM)	4	0.75188	0.256634	ITGB1, CACNB4, SGCA, MYL3	172	79	7691	2.26406	1	1	1
KEGG_PATHWAY	mmu05414:Dilated cardiomyopathy	4	0.75188	0.280819	ITGB1, CACNB4, SGCA, MYL3	172	83	7691	2.15495	1	1	1
Annotation Cluster 28	Enrichment Score: 0.6224721478397749
Category	Term	Count	%	PValue	Genes	List Total	Pop Hits	Pop Total	Fold Enrichment	Bonferroni	Benjamini	FDR
UP_KEYWORDS	Lipid metabolism	13	2.44361	0.181535	PLA2G12A, ECHS1, MVK, ACSM3, TAMM41, PTGES3, HMGCR, PLA2G15, PLCXD3, ETNK1, SERAC1, SPTSSA, SLC27A4	483	417	22680	1.46387	1	1	0.98951
GOTERM_BP_DIRECT	GO:0006629~lipid metabolic process	14	2.63158	0.228726	PLA2G12A, ECHS1, MVK, ACSM3, TAMM41, PTGES3, SRD5A3, HMGCR, PLA2G15, PLCXD3, ETNK1, SERAC1, SPTSSA, SLC27A4	405	459	18082	1.36178	1	1	1
UP_KEYWORDS	Lipid biosynthesis	6	1.12782	0.254259	MVK, TAMM41, ETNK1, PTGES3, SERAC1, HMGCR	483	160	22680	1.76087	1	1	0.98951
GOTERM_BP_DIRECT	GO:0006631~fatty acid metabolic process	6	1.12782	0.270257	PLA2G15, ECHS1, ACSM3, PTGES3, ANKRD23, SLC27A4	405	156	18082	1.71719	1	1	1
UP_KEYWORDS	Fatty acid metabolism	5	0.93985	0.270588	PLA2G15, ECHS1, ACSM3, PTGES3, SLC27A4	483	124	22680	1.89341	1	1	0.98951
Annotation Cluster 29	Enrichment Score: 0.6216319077783719
Category	Term	Count	%	PValue	Genes	List Total	Pop Hits	Pop Total	Fold Enrichment	Bonferroni	Benjamini	FDR
GOTERM_BP_DIRECT	GO:0030030~cell projection organization	8	1.50376	0.0531519	IFT20, ICK, TMEM17, CATIP, CUL3, FBF1, WDR19, AKT1	405	151	18082	2.3654	1	1	1
UP_KEYWORDS	Cilium biogenesis/degradation	7	1.31579	0.0786673	IFT20, ICK, TMEM17, CATIP, CUL3, FBF1, WDR19	483	140	22680	2.34783	1	1	0.98951
GOTERM_BP_DIRECT	GO:0007224~smoothened signaling pathway	4	0.75188	0.211667	IFT20, TMEM17, WDR19, PDX1	405	71	18082	2.51532	1	1	1
GOTERM_BP_DIRECT	GO:0042384~cilium assembly	5	0.93985	0.325974	IFT20, ICK, TMEM17, FBF1, WDR19	405	129	18082	1.7305	1	1	1
GOTERM_CC_DIRECT	GO:0005929~cilium	7	1.31579	0.502288	IFT20, ICK, TMEM17, TRPV4, CCDC114, TBC1D30, WDR19	435	257	19662	1.23113	1	1	1
GOTERM_BP_DIRECT	GO:0060271~cilium morphogenesis	5	0.93985	0.528764	IFT20, ICK, TMEM17, FBF1, WDR19	405	170	18082	1.31314	1	1	1
UP_KEYWORDS	Cilium	5	0.93985	0.581049	IFT20, TMEM17, TRPV4, CCDC114, WDR19	483	191	22680	1.22923	1	1	0.98951
Annotation Cluster 30	Enrichment Score: 0.5977982197669933
Category	Term	Count	%	PValue	Genes	List Total	Pop Hits	Pop Total	Fold Enrichment	Bonferroni	Benjamini	FDR
UP_SEQ_FEATURE	domain:EF-hand 3	5	0.93985	0.142336	SPTA1, HPCA, MYL3, SLC25A23, SLC25A13	399	91	18012	2.48038	1	1	1
INTERPRO	IPR011992:EF-hand-like domain	10	1.8797	0.145496	SPTA1, CAPN11, STXBP4, S100A16, HPCA, MYL3, ANKEF1, S100B, SLC25A23, SLC25A13	451	273	20594	1.67264	1	1	1
UP_SEQ_FEATURE	domain:EF-hand 2	7	1.31579	0.184965	SPTA1, CAPN11, HPCA, MYL3, S100B, SLC25A23, SLC25A13	399	173	18012	1.82659	1	1	1
UP_SEQ_FEATURE	domain:EF-hand 1	7	1.31579	0.188292	SPTA1, CAPN11, HPCA, MYL3, S100B, SLC25A23, SLC25A13	399	174	18012	1.81609	1	1	1
INTERPRO	IPR002048:EF-hand domain	8	1.50376	0.216789	SPTA1, CAPN11, S100A16, HPCA, MYL3, S100B, SLC25A23, SLC25A13	451	223	20594	1.63813	1	1	1
UP_SEQ_FEATURE	calcium-binding region:2	5	0.93985	0.244974	SPTA1, CAPN11, HPCA, SLC25A23, SLC25A13	399	114	18012	1.97995	1	1	1
GOTERM_MF_DIRECT	GO:0005509~calcium ion binding	19	3.57143	0.264978	PLA2G12A, ADGRV1, ANXA2, HPCA, CLSTN1, S100B, PCDHB20, SPTA1, CAPN11, PCDHB19, SGCA, S100A16, MGP, MYL3, CDHR2, CD248, SVEP1, SLC25A23, SLC25A13	381	699	17446	1.24465	1	1	1
UP_SEQ_FEATURE	calcium-binding region:1	5	0.93985	0.303799	SPTA1, CAPN11, HPCA, SLC25A23, SLC25A13	399	126	18012	1.79138	1	1	1
INTERPRO	IPR018247:EF-Hand 1, calcium-binding site	5	0.93985	0.533957	CAPN11, S100A16, HPCA, S100B, SLC25A23	451	175	20594	1.30466	1	1	1
SMART	SM00054:EFh	4	0.75188	0.638959	CAPN11, HPCA, S100B, SLC25A23	236	145	10425	1.21859	1	1	1
Annotation Cluster 31	Enrichment Score: 0.5885920199308496
Category	Term	Count	%	PValue	Genes	List Total	Pop Hits	Pop Total	Fold Enrichment	Bonferroni	Benjamini	FDR
INTERPRO	IPR002067:Mitochondrial carrier protein	3	0.56391	0.109863	SLC25A19, SLC25A23, SLC25A13	451	26	20594	5.2688	1	1	1
UP_SEQ_FEATURE	repeat:Solcar 3	3	0.56391	0.278564	SLC25A19, SLC25A23, SLC25A13	399	47	18012	2.88146	1	1	1
UP_SEQ_FEATURE	repeat:Solcar 1	3	0.56391	0.311375	SLC25A19, SLC25A23, SLC25A13	399	51	18012	2.65546	1	1	1
UP_SEQ_FEATURE	repeat:Solcar 2	3	0.56391	0.311375	SLC25A19, SLC25A23, SLC25A13	399	51	18012	2.65546	1	1	1
INTERPRO	IPR018108:Mitochondrial substrate/solute carrier	3	0.56391	0.314813	SLC25A19, SLC25A23, SLC25A13	451	52	20594	2.6344	1	1	1
INTERPRO	IPR023395:Mitochondrial carrier domain	3	0.56391	0.314813	SLC25A19, SLC25A23, SLC25A13	451	52	20594	2.6344	1	1	1
Annotation Cluster 32	Enrichment Score: 0.5702077984293606
Category	Term	Count	%	PValue	Genes	List Total	Pop Hits	Pop Total	Fold Enrichment	Bonferroni	Benjamini	FDR
UP_SEQ_FEATURE	topological domain:Lumenal	14	2.63158	0.153362	CHST8, RHBDF1, GALNT14, RPN2, GALNT18, TAP2, CTNS, XYLT1, CREB3, PIGA, SPTSSA, CHST4, TLR3, TMPO	399	427	18012	1.48009	1	1	1
GOTERM_CC_DIRECT	GO:0000139~Golgi membrane	12	2.25564	0.275921	CHST8, RHBDF1, SCAMP5, CREB3, RAB2B, GALNT14, HACE1, GALNT18, CUL3, CLSTN1, XYLT1, CHST4	435	403	19662	1.34591	1	1	1
UP_KEYWORDS	Signal-anchor	11	2.06767	0.460123	CHST8, CREB3, ABHD13, GALNT14, COMTD1, GALNT18, CLEC2G, XYLT1, LNPEP, CHST4, TMPO	483	439	22680	1.17659	1	1	0.98951
Annotation Cluster 33	Enrichment Score: 0.5633582356985763
Category	Term	Count	%	PValue	Genes	List Total	Pop Hits	Pop Total	Fold Enrichment	Bonferroni	Benjamini	FDR
GOTERM_BP_DIRECT	GO:0007067~mitotic nuclear division	11	2.06767	0.093561	MAD2L2, WEE1, NSUN2, CHEK2, CENPC1, ENSA, HAUS4, CENPN, SMC1A, GEM, ANAPC2	405	277	18082	1.77298	1	1	1
KEGG_PATHWAY	mmu04110:Cell cycle	6	1.12782	0.141957	MAD2L2, WEE1, CHEK2, E2F2, SMC1A, ANAPC2	172	124	7691	2.16363	1	1	1
UP_KEYWORDS	Mitosis	9	1.69173	0.187691	MAD2L2, WEE1, NSUN2, CHEK2, CENPC1, ENSA, HAUS4, SMC1A, ANAPC2	483	259	22680	1.63169	1	1	0.98951
UP_KEYWORDS	Cell cycle	16	3.00752	0.361352	HACE1, NSUN2, HAUS4, CDC5L, AHR, SMC1A, RCBTB1, MAD2L2, GAK, WEE1, MARVELD1, CHEK2, CENPC1, ENSA, E2F2, ANAPC2	483	626	22680	1.20017	1	1	0.98951
GOTERM_BP_DIRECT	GO:0007049~cell cycle	16	3.00752	0.394827	HACE1, NSUN2, HAUS4, CDC5L, AHR, SMC1A, RCBTB1, MAD2L2, GAK, WEE1, MARVELD1, CHEK2, CENPC1, ENSA, E2F2, ANAPC2	405	614	18082	1.16344	1	1	1
UP_KEYWORDS	Cell division	9	1.69173	0.534194	MAD2L2, WEE1, NSUN2, CHEK2, CENPC1, ENSA, HAUS4, SMC1A, ANAPC2	483	372	22680	1.13604	1	1	0.98951
GOTERM_BP_DIRECT	GO:0051301~cell division	9	1.69173	0.599462	MAD2L2, WEE1, NSUN2, CHEK2, CENPC1, ENSA, HAUS4, SMC1A, ANAPC2	405	374	18082	1.07439	1	1	1
Annotation Cluster 34	Enrichment Score: 0.5492042774420831
Category	Term	Count	%	PValue	Genes	List Total	Pop Hits	Pop Total	Fold Enrichment	Bonferroni	Benjamini	FDR
GOTERM_BP_DIRECT	GO:0007264~small GTPase mediated signal transduction	10	1.8797	0.0838415	BCAR3, CDC42SE1, RAB2B, RASD1, RAB34, CHM, RALGDS, RHOD, GEM, RHOB	405	236	18082	1.89182	1	1	1
INTERPRO	IPR001806:Small GTPase superfamily	6	1.12782	0.170248	RAB2B, RASD1, RAB34, RHOD, GEM, RHOB	451	134	20594	2.04461	1	1	1
UP_SEQ_FEATURE	short sequence motif:Effector region	5	0.93985	0.180335	RAB2B, RASD1, RAB34, RHOD, RHOB	399	100	18012	2.25714	1	1	1
UP_KEYWORDS	Prenylation	6	1.12782	0.24234	RAB2B, RASD1, CNP, RAB34, RHOD, RHOB	483	157	22680	1.79452	1	1	0.98951
UP_SEQ_FEATURE	nucleotide phosphate-binding region:GTP	10	1.8797	0.275423	RAB2B, RRAGA, RASD1, TUBB5, 1700017B05RIK, GNA11, RAB34, RHOD, GEM, RHOB	399	319	18012	1.41514	1	1	1
UP_KEYWORDS	GTP-binding	10	1.8797	0.275935	RAB2B, RRAGA, RASD1, TUBB5, GNA11, RAB34, RHOD, GBP4, GEM, RHOB	483	332	22680	1.41435	1	1	0.98951
INTERPRO	IPR005225:Small GTP-binding protein domain	6	1.12782	0.293426	RAB2B, RASD1, RAB34, RHOD, GEM, RHOB	451	165	20594	1.66047	1	1	1
INTERPRO	IPR027417:P-loop containing nucleoside triphosphate hydrolase	22	4.13534	0.428679	RAB2B, DDX27, CNP, CHD7, TAP2, TTF2, DDX60, SMC1A, RHOD, GEM, RHOB, RRAGA, CACNB4, RASD1, DHX35, ASNA1, GNA11, RAB34, KIF1A, KIF21B, CHST4, GBP4	451	909	20594	1.10515	1	1	1
GOTERM_MF_DIRECT	GO:0005525~GTP binding	10	1.8797	0.45293	RAB2B, RRAGA, RASD1, TUBB5, GNA11, RAB34, RHOD, GBP4, GEM, RHOB	381	383	17446	1.19556	1	1	1
GOTERM_MF_DIRECT	GO:0003924~GTPase activity	6	1.12782	0.479279	RRAGA, TUBB5, GNA11, RAB34, GBP4, GEM	381	209	17446	1.31455	1	1	1
UP_SEQ_FEATURE	lipid moiety-binding region:S-geranylgeranyl cysteine	3	0.56391	0.702506	RAB2B, RAB34, RHOD	399	110	18012	1.23117	1	1	1
Annotation Cluster 35	Enrichment Score: 0.5367608733465772
Category	Term	Count	%	PValue	Genes	List Total	Pop Hits	Pop Total	Fold Enrichment	Bonferroni	Benjamini	FDR
UP_KEYWORDS	Lipid biosynthesis	6	1.12782	0.254259	MVK, TAMM41, ETNK1, PTGES3, SERAC1, HMGCR	483	160	22680	1.76087	1	1	0.98951
UP_KEYWORDS	Phospholipid biosynthesis	3	0.56391	0.255882	TAMM41, ETNK1, SERAC1	483	46	22680	3.06238	1	1	0.98951
UP_KEYWORDS	Phospholipid metabolism	3	0.56391	0.287511	TAMM41, ETNK1, SERAC1	483	50	22680	2.81739	1	1	0.98951
GOTERM_BP_DIRECT	GO:0008654~phospholipid biosynthetic process	3	0.56391	0.381053	TAMM41, ETNK1, SERAC1	405	59	18082	2.27018	1	1	1
Annotation Cluster 36	Enrichment Score: 0.5290533539158735
Category	Term	Count	%	PValue	Genes	List Total	Pop Hits	Pop Total	Fold Enrichment	Bonferroni	Benjamini	FDR
KEGG_PATHWAY	mmu00010:Glycolysis / Gluconeogenesis	4	0.75188	0.180915	GPI1, ALDH1A3, LDHA, ALDH7A1	172	66	7691	2.71001	1	1	1
UP_KEYWORDS	NAD	7	1.31579	0.195308	ND6, ALDH1A3, DHRS7, LDHA, PARP16, ALDH7A1, ND4	483	183	22680	1.79615	1	1	0.98951
UP_SEQ_FEATURE	nucleotide phosphate-binding region:NAD	4	0.75188	0.732224	ALDH1A3, DHRS7, LDHA, ALDH7A1	399	171	18012	1.05597	1	1	1
Annotation Cluster 37	Enrichment Score: 0.5084129436978855
Category	Term	Count	%	PValue	Genes	List Total	Pop Hits	Pop Total	Fold Enrichment	Bonferroni	Benjamini	FDR
GOTERM_CC_DIRECT	GO:0005667~transcription factor complex	9	1.69173	0.238647	SKI, TCF7L1, LDB1, E2F2, TFAM, AHR, SOX9, WTIP, USF1	435	267	19662	1.5236	1	1	1
SMART	SM00398:HMG	3	0.56391	0.344673	TCF7L1, TFAM, SOX9	236	54	10425	2.4541	1	1	1
INTERPRO	IPR009071:High mobility group (HMG) box domain	3	0.56391	0.362743	TCF7L1, TFAM, SOX9	451	58	20594	2.36188	1	1	1
Annotation Cluster 38	Enrichment Score: 0.49821446886367354
Category	Term	Count	%	PValue	Genes	List Total	Pop Hits	Pop Total	Fold Enrichment	Bonferroni	Benjamini	FDR
KEGG_PATHWAY	mmu04512:ECM-receptor interaction	5	0.93985	0.131953	ITGB1, COL5A1, COL5A3, COL6A1, CD44	172	88	7691	2.54063	1	1	1
KEGG_PATHWAY	mmu04974:Protein digestion and absorption	5	0.93985	0.131953	COL5A1, ELN, COL5A3, COL6A1, SLC8A2	172	88	7691	2.54063	1	1	1
UP_KEYWORDS	Extracellular matrix	8	1.50376	0.235806	POSTN, ANXA2, COL5A1, ELN, COL5A3, COL6A1, CPA6, NTN3	483	235	22680	1.59852	1	1	0.98951
GOTERM_CC_DIRECT	GO:0031012~extracellular matrix	9	1.69173	0.324308	POSTN, TUBB5, COL5A1, COL5A3, COL6A1, MGP, ADAMTSL2, TIMP1, SOD3	435	294	19662	1.38367	1	1	1
KEGG_PATHWAY	mmu04611:Platelet activation	5	0.93985	0.332751	ITGB1, COL5A1, COL5A3, P2RY1, AKT1	172	131	7691	1.70668	1	1	1
KEGG_PATHWAY	mmu04510:Focal adhesion	6	1.12782	0.489984	ITGB1, COL5A1, COL5A3, COL6A1, AKT1, BCAR1	172	207	7691	1.29609	1	1	1
INTERPRO	IPR008160:Collagen triple helix repeat	3	0.56391	0.497125	COL5A1, COL5A3, COL6A1	451	76	20594	1.80249	1	1	1
UP_KEYWORDS	Collagen	3	0.56391	0.542089	COL5A1, COL5A3, COL6A1	483	85	22680	1.65729	1	1	0.98951
UP_KEYWORDS	Hydroxylation	3	0.56391	0.560896	COL5A1, ELN, COL6A1	483	88	22680	1.60079	1	1	0.98951
Annotation Cluster 39	Enrichment Score: 0.46987200057217293
Category	Term	Count	%	PValue	Genes	List Total	Pop Hits	Pop Total	Fold Enrichment	Bonferroni	Benjamini	FDR
GOTERM_BP_DIRECT	GO:0009615~response to virus	5	0.93985	0.118748	CHRM2, BCL3, EIF2AK2, DDX60, TLR3	405	84	18082	2.65755	1	1	1
GOTERM_MF_DIRECT	GO:0003725~double-stranded RNA binding	3	0.56391	0.452665	EIF2AK2, DDX60, TLR3	381	70	17446	1.96243	1	1	1
GOTERM_BP_DIRECT	GO:0051607~defense response to virus	4	0.75188	0.724405	EIF2AK2, DDX60, IFNL3, TLR3	405	167	18082	1.06939	1	1	1
Annotation Cluster 40	Enrichment Score: 0.44238692161485427
Category	Term	Count	%	PValue	Genes	List Total	Pop Hits	Pop Total	Fold Enrichment	Bonferroni	Benjamini	FDR
INTERPRO	IPR005829:Sugar transporter, conserved site	3	0.56391	0.139089	SLC46A1, SLC22A5, SLC22A21	451	30	20594	4.5663	1	1	1
INTERPRO	IPR020846:Major facilitator superfamily domain	5	0.93985	0.395906	SLC46A1, SLC22A5, SLC22A16, SLC18B1, SLC22A21	451	146	20594	1.5638	1	1	1
GOTERM_MF_DIRECT	GO:0005215~transporter activity	4	0.75188	0.854976	SLC46A1, FABP3, SLC22A5, SLC22A21	381	217	17446	0.844056	1	1	1
Annotation Cluster 41	Enrichment Score: 0.41088531589299254
Category	Term	Count	%	PValue	Genes	List Total	Pop Hits	Pop Total	Fold Enrichment	Bonferroni	Benjamini	FDR
GOTERM_MF_DIRECT	GO:0003676~nucleic acid binding	36	6.76692	0.0681878	SF3B4, ZFP940, ZFP566, DDX27, ZFP948, GPATCH4, PRDM1, TTF2, 9030624G23RIK, NKRF, ZKSCAN6, DHX35, PCBP1, ZFP120, ZFP362, HIVEP1, RBM7, ALYREF2, RBM12B2, ZFP143, KLF10, SF3A3, ZFP114, ZFP235, ALYREF, ZFP619, MTERF1A, ZCRB1, NEIL3, HNRNPH1, SNAI1, NABP1, RNPS1, ZFP112, CPEB2, ZFP397	381	1237	17446	1.33261	1	1	1
UP_SEQ_FEATURE	zinc finger region:C2H2-type 1	9	1.69173	0.227136	KLF10, ZFP488, ZKSCAN6, SNAI1, HIVEP1, ZFP120, PRDM1, ZFP112, ZFP143	399	263	18012	1.54481	1	1	1
UP_SEQ_FEATURE	zinc finger region:C2H2-type 2	9	1.69173	0.24246	KLF10, ZFP488, ZKSCAN6, SNAI1, HIVEP1, ZFP120, PRDM1, ZFP112, ZFP143	399	268	18012	1.51599	1	1	1
INTERPRO	IPR015880:Zinc finger, C2H2-like	19	3.57143	0.263227	KLF10, ZFP940, ZFP566, ZFP114, ZFP235, ZFP488, ZFP619, ZFP948, PRDM1, ZKSCAN6, DNAJC21, SNAI1, ZFP362, HIVEP1, ZFP120, MZF1, ZFP112, ZFP397, ZFP143	451	693	20594	1.25194	1	1	1
UP_SEQ_FEATURE	domain:KRAB	3	0.56391	0.294997	ZKSCAN6, ZFP120, ZFP112	399	49	18012	2.76385	1	1	1
SMART	SM00355:ZnF_C2H2	19	3.57143	0.299833	KLF10, ZFP940, ZFP566, ZFP114, ZFP235, ZFP488, ZFP619, ZFP948, PRDM1, ZKSCAN6, DNAJC21, SNAI1, ZFP362, HIVEP1, ZFP120, MZF1, ZFP112, ZFP397, ZFP143	236	693	10425	1.21111	1	1	1
INTERPRO	IPR007087:Zinc finger, C2H2	19	3.57143	0.335939	KLF10, ZFP940, ZFP566, ZFP114, ZFP235, ZFP488, ZFP619, ZFP948, PRDM1, ZKSCAN6, DNAJC21, SNAI1, ZFP362, HIVEP1, ZFP120, MZF1, ZFP112, ZFP397, ZFP143	451	731	20594	1.18686	1	1	1
UP_KEYWORDS	Zinc-finger	37	6.95489	0.35068	ZFP940, ZFP566, ZFP488, ZFAND4, KMT2B, ZFP948, PRDM1, ZFYVE28, FGD5, TRIM7, ZKSCAN6, DNAJC21, ZFP120, HIVEP1, ZSWIM6, TRIM27, RPS27A, TRIM65, TNS2, ZFP143, KLF10, SF3A3, KDM4A, ZFP114, ZFP235, BRF2, NR1H2, IRF2BP1, ZFP619, ZCRB1, NEIL3, TRAF5, SNAI1, MZF1, ZFP112, TAF3, ZFP397	483	1565	22680	1.11015	1	1	0.98951
INTERPRO	IPR013087:Zinc finger C2H2-type/integrase DNA-binding domain	17	3.19549	0.3574	KLF10, ZFP940, ZFP566, ZFP114, ZFP235, ZFP619, ZFP948, PRDM1, ZKSCAN6, SNAI1, ZFP362, HIVEP1, ZFP120, MZF1, ZFP112, ZFP397, ZFP143	451	652	20594	1.1906	1	1	1
UP_KEYWORDS	Zinc	48	9.02256	0.376063	ZFP940, ZFP566, ZFP488, ZFAND4, KMT2B, ZFP948, PRDM1, MYSM1, GM4907, ZFYVE28, FGD5, TRIM7, ZKSCAN6, ASNA1, DNAJC21, ZFP120, HIVEP1, ZSWIM6, TRIM27, TIMP1, RPS27A, CPA6, TRIM65, TNS2, ZFP143, KLF10, LMO1, SF3A3, KDM4A, ZFP114, ZFP235, BRF2, NR1H2, IRF2BP1, ZFP619, LNPEP, ZCRB1, WTIP, S100B, SOD3, NEIL3, AGBL2, TRAF5, SNAI1, MZF1, ZFP112, TAF3, ZFP397	483	2099	22680	1.0738	1	1	0.98951
INTERPRO	IPR001909:Krueppel-associated box	10	1.8797	0.41841	ZFP940, ZFP566, ZFP114, ZFP235, ZKSCAN6, ZFP120, ZFP619, ZFP948, ZFP112, 9030624G23RIK	451	373	20594	1.22421	1	1	1
SMART	SM00349:KRAB	10	1.8797	0.44682	ZFP940, ZFP566, ZFP114, ZFP235, ZKSCAN6, ZFP120, ZFP619, ZFP948, ZFP112, 9030624G23RIK	236	367	10425	1.20364	1	1	1
UP_SEQ_FEATURE	zinc finger region:C2H2-type 4	6	1.12782	0.516824	ZKSCAN6, HIVEP1, ZFP120, PRDM1, ZFP112, ZFP143	399	215	18012	1.2598	1	1	1
UP_SEQ_FEATURE	zinc finger region:C2H2-type 3	7	1.31579	0.518271	KLF10, ZKSCAN6, SNAI1, ZFP120, PRDM1, ZFP112, ZFP143	399	261	18012	1.21073	1	1	1
UP_KEYWORDS	Metal-binding	72	13.5338	0.578951	ITGB1, GALNT14, ZFP566, ZFP488, ZFAND4, ACSM3, GALNT18, PRDM1, MYSM1, SLC8A2, ZFYVE28, TRIM7, PPAT, CHEK2, ZFP120, TRIM27, TIMP1, TRIM65, TNS2, LMO1, KLF10, PLA2G12A, ZFP619, ZCRB1, NEIL3, CTDSP1, TRAF5, MZF1, SLC25A13, ZFP940, KMT2B, HPCA, ZFP948, GM4907, SPTA1, FGD5, S100A16, ZKSCAN6, ASNA1, GNA11, DNAJC21, HIVEP1, CSK, ZSWIM6, SLC25A23, RPS27A, CPA6, MAP2K5, ZFP143, SF3A3, KDM4A, ZFP114, ZFP23…	483	3395	22680	0.995838	1	1	0.98951
GOTERM_MF_DIRECT	GO:0046872~metal ion binding	70	13.1579	0.723741	ITGB1, GALNT14, ZFP566, ZFP488, ZFAND4, ACSM3, GALNT18, PRDM1, MYSM1, SLC8A2, ZFYVE28, TRIM7, PPAT, CHEK2, ZFP120, ZFP362, TRIM27, TIMP1, TRIM65, TNS2, LMO1, KLF10, POSTN, PLA2G12A, ZFP619, ZCRB1, NEIL3, CTDSP1, TRAF5, MZF1, SLC25A13, ZFP940, KMT2B, HPCA, ZFP948, SPTA1, FGD5, ZKSCAN6, ASNA1, GNA11, HIVEP1, CSK, ZSWIM6, SLC25A23, RPS27A, CPA6, MAP2K5, ZFP143, SF3A3, KDM4A, ZFP114, ZFP235, BRF2, NR…	381	3355	17446	0.955381	1	1	1
UP_SEQ_FEATURE	zinc finger region:C2H2-type 7	3	0.56391	0.781855	ZFP120, ZFP112, ZFP143	399	129	18012	1.04983	1	1	1
UP_SEQ_FEATURE	zinc finger region:C2H2-type 5	4	0.75188	0.805741	ZKSCAN6, HIVEP1, ZFP112, ZFP143	399	194	18012	0.930781	1	1	1
UP_SEQ_FEATURE	zinc finger region:C2H2-type 6	3	0.56391	0.852613	ZFP120, ZFP112, ZFP143	399	152	18012	0.890977	1	1	1
Annotation Cluster 42	Enrichment Score: 0.40499830589569336
Category	Term	Count	%	PValue	Genes	List Total	Pop Hits	Pop Total	Fold Enrichment	Bonferroni	Benjamini	FDR
INTERPRO	IPR001849:Pleckstrin homology domain	8	1.50376	0.348232	PHLDB1, FGD5, DOK3, VEPH1, AKT1, PLEKHO1, KIF1A, ARHGEF5	451	262	20594	1.39429	1	1	1
SMART	SM00233:PH	8	1.50376	0.349385	PHLDB1, FGD5, DOK3, VEPH1, AKT1, PLEKHO1, KIF1A, ARHGEF5	236	253	10425	1.3968	1	1	1
INTERPRO	IPR011993:Pleckstrin homology-like domain	11	2.06767	0.404375	ENAH, PHLDB1, FGD5, DOK3, VEPH1, AKT1, PLEKHO1, FRS2, KIF1A, ARHGEF5, TNS2	451	409	20594	1.2281	1	1	1
UP_SEQ_FEATURE	domain:PH	6	1.12782	0.487585	PHLDB1, DOK3, VEPH1, AKT1, PLEKHO1, KIF1A	399	208	18012	1.3022	1	1	1
Annotation Cluster 43	Enrichment Score: 0.40123326848968754
Category	Term	Count	%	PValue	Genes	List Total	Pop Hits	Pop Total	Fold Enrichment	Bonferroni	Benjamini	FDR
INTERPRO	IPR001650:Helicase, C-terminal	5	0.93985	0.215678	DDX27, DHX35, CHD7, TTF2, DDX60	451	109	20594	2.09463	1	1	1
INTERPRO	IPR014001:Helicase, superfamily 1/2, ATP-binding domain	5	0.93985	0.224921	DDX27, DHX35, CHD7, TTF2, DDX60	451	111	20594	2.05689	1	1	1
SMART	SM00490:HELICc	5	0.93985	0.226494	DDX27, DHX35, CHD7, TTF2, DDX60	236	108	10425	2.04508	1	1	1
SMART	SM00487:DEXDc	5	0.93985	0.236173	DDX27, DHX35, CHD7, TTF2, DDX60	236	110	10425	2.0079	1	1	1
UP_SEQ_FEATURE	domain:Helicase C-terminal	3	0.56391	0.624067	DDX27, CHD7, TTF2	399	95	18012	1.42556	1	1	1
UP_SEQ_FEATURE	domain:Helicase ATP-binding	3	0.56391	0.640942	DDX27, CHD7, TTF2	399	98	18012	1.38192	1	1	1
UP_KEYWORDS	Helicase	3	0.56391	0.766679	DDX27, CHD7, TTF2	483	130	22680	1.08361	1	1	0.98951
GOTERM_MF_DIRECT	GO:0004386~helicase activity	3	0.56391	0.775077	DDX27, CHD7, TTF2	381	129	17446	1.06488	1	1	1
Annotation Cluster 44	Enrichment Score: 0.3980556022459254
Category	Term	Count	%	PValue	Genes	List Total	Pop Hits	Pop Total	Fold Enrichment	Bonferroni	Benjamini	FDR
UP_KEYWORDS	Lysosome	8	1.50376	0.280013	GALNS, PLA2G15, SLC35F6, RRAGA, OSTM1, CTNS, ATP13A2, LGMN	483	249	22680	1.50864	1	1	0.98951
GOTERM_CC_DIRECT	GO:0005764~lysosome	9	1.69173	0.445392	GALNS, PLA2G15, SLC35F6, RRAGA, OSTM1, 4930486L24RIK, CTNS, ATP13A2, LGMN	435	331	19662	1.229	1	1	1
KEGG_PATHWAY	mmu04142:Lysosome	4	0.75188	0.512758	GALNS, PLA2G15, CTNS, LGMN	172	122	7691	1.46607	1	1	1
Annotation Cluster 45	Enrichment Score: 0.39394710093146146
Category	Term	Count	%	PValue	Genes	List Total	Pop Hits	Pop Total	Fold Enrichment	Bonferroni	Benjamini	FDR
GOTERM_MF_DIRECT	GO:0030246~carbohydrate binding	8	1.50376	0.233241	CD24A, GALNT14, MGL2, GALNT18, GFPT2, CLEC11A, CLEC2G, CD248	381	229	17446	1.59965	1	1	1
UP_KEYWORDS	Lectin	6	1.12782	0.307334	GALNT14, MGL2, GALNT18, CLEC11A, CLEC2G, CD248	483	173	22680	1.62855	1	1	0.98951
INTERPRO	IPR016186:C-type lectin-like	5	0.93985	0.351285	MGL2, CLEC11A, CLEC2G, CD248, CD44	451	137	20594	1.66653	1	1	1
INTERPRO	IPR016187:C-type lectin fold	5	0.93985	0.390963	MGL2, CLEC11A, CLEC2G, CD248, CD44	451	145	20594	1.57459	1	1	1
INTERPRO	IPR001304:C-type lectin	4	0.75188	0.511136	MGL2, CLEC11A, CLEC2G, CD248	451	124	20594	1.473	1	1	1
SMART	SM00034:CLECT	4	0.75188	0.532684	MGL2, CLEC11A, CLEC2G, CD248	236	124	10425	1.42496	1	1	1
UP_SEQ_FEATURE	domain:C-type lectin	3	0.56391	0.651858	CLEC11A, CLEC2G, CD248	399	100	18012	1.35429	1	1	1
Annotation Cluster 46	Enrichment Score: 0.3690746241122629
Category	Term	Count	%	PValue	Genes	List Total	Pop Hits	Pop Total	Fold Enrichment	Bonferroni	Benjamini	FDR
KEGG_PATHWAY	mmu04668:TNF signaling pathway	5	0.93985	0.223907	CREB3, TRADD, TRAF5, BCL3, AKT1	172	109	7691	2.05115	1	1	1
GOTERM_BP_DIRECT	GO:0042981~regulation of apoptotic process	6	1.12782	0.458464	RASSF3, TRADD, TRAF5, BCL3, EIF2AK2, FRS2	405	199	18082	1.34614	1	1	1
KEGG_PATHWAY	mmu05203:Viral carcinogenesis	5	0.93985	0.761032	CREB3, TRADD, TRAF5, H2-M3, EIF2AK2	172	231	7691	0.96786	1	1	1
Annotation Cluster 47	Enrichment Score: 0.3645220227876629
Category	Term	Count	%	PValue	Genes	List Total	Pop Hits	Pop Total	Fold Enrichment	Bonferroni	Benjamini	FDR
GOTERM_CC_DIRECT	GO:0000786~nucleosome	6	1.12782	0.091056	H1FOO, H1F0, HIST1H2AN, HIST1H3F, H2AFV, PRM3	435	108	19662	2.51111	1	1	1
UP_KEYWORDS	Nucleosome core	4	0.75188	0.357591	HIST1H2AN, HIST1H3F, H2AFV, PRM3	483	100	22680	1.87826	1	1	0.98951
UP_KEYWORDS	Chromosome	11	2.06767	0.370048	H1FOO, H1F0, HIST1H2AN, DDX27, CENPC1, HIST1H3F, H2AFV, CENPN, SMC1A, PRM3, TMPO	483	409	22680	1.26289	1	1	0.98951
UP_SEQ_FEATURE	cross-link:Glycyl lysine isopeptide (Lys-Gly) (interchain with G-Cter in ubiquitin)	9	1.69173	0.405214	ZFYVE28, HIST1H2AN, TUBB5, RPN2, HIST1H3F, CEP170B, TARS, H2AFV, RPS27A	399	318	18012	1.27763	1	1	1
GOTERM_CC_DIRECT	GO:0005694~chromosome	9	1.69173	0.486142	H1FOO, H1F0, DDX27, CENPC1, H2AFV, CENPN, SMC1A, PRM3, TMPO	435	344	19662	1.18256	1	1	1
INTERPRO	IPR007125:Histone core	3	0.56391	0.524489	HIST1H2AN, HIST1H3F, H2AFV	451	80	20594	1.71236	1	1	1
KEGG_PATHWAY	mmu05034:Alcoholism	5	0.93985	0.662401	CREB3, HIST1H2AN, HIST1H3F, H2AFV, GRIN2D	172	202	7691	1.10681	1	1	1
INTERPRO	IPR009072:Histone-fold	3	0.56391	0.753414	HIST1H2AN, HIST1H3F, H2AFV	451	123	20594	1.11373	1	1	1
KEGG_PATHWAY	mmu05322:Systemic lupus erythematosus	3	0.56391	0.843355	HIST1H2AN, HIST1H3F, H2AFV	172	147	7691	0.912553	1	1	1
Annotation Cluster 48	Enrichment Score: 0.3592543385156559
Category	Term	Count	%	PValue	Genes	List Total	Pop Hits	Pop Total	Fold Enrichment	Bonferroni	Benjamini	FDR
GOTERM_MF_DIRECT	GO:0098641~cadherin binding involved in cell-cell adhesion	9	1.69173	0.263829	ITGB1, LDHA, ATIC, ANXA2, PCBP1, CTNND1, HIST1H3F, FSCN1, TMPO	381	279	17446	1.4771	1	1	1
GOTERM_CC_DIRECT	GO:0005913~cell-cell adherens junction	9	1.69173	0.397338	ITGB1, LDHA, ATIC, ANXA2, PCBP1, CTNND1, HIST1H3F, FSCN1, TMPO	435	316	19662	1.28734	1	1	1
GOTERM_BP_DIRECT	GO:0098609~cell-cell adhesion	4	0.75188	0.797542	LDHA, ATIC, FSCN1, TMPO	405	189	18082	0.944908	1	1	1
Annotation Cluster 49	Enrichment Score: 0.3527811092379992
Category	Term	Count	%	PValue	Genes	List Total	Pop Hits	Pop Total	Fold Enrichment	Bonferroni	Benjamini	FDR
GOTERM_MF_DIRECT	GO:0000166~nucleotide binding	55	10.3383	0.0338855	ACSM3, CHD7, MRPL39, TTF2, CCT6B, TUBB5, CHEK2, AKT1, KIF1A, KIF21B, RBM12B2, RBM7, ALYREF2, RAB2B, SPHK1, TAP2, ZCRB1, SMC1A, RHOD, GEM, RHOB, GAK, RRAGA, GM4832, HNRNPH1, RAB34, SLC22A21, SLC27A4, SF3B4, DDX27, SLC22A5, MVK, GUCY2D, TARS, RASD1, ASNA1, GNA11, CSK, MAP2K5, TRAP1, ALYREF, EIF2AK2, UBE2G2, ACVR2B, CDK9, ICK, WEE1, TRPV4, ETNK1, ATP13A2, UBA1, RNPS1, CPEB2, HCN2, GALK1	381	1936	17446	1.30085	1	1	1
UP_KEYWORDS	Nucleotide-binding	46	8.64662	0.109329	GUCY2D, DDX27, SLC22A5, MVK, ACSM3, CHD7, TARS, TTF2, CCT6B, TUBB5, RASD1, CHEK2, GNA11, DHX35, ASNA1, AKT1, CSK, KIF1A, KIF21B, GBP4, MAP2K5, TRAP1, RAB2B, SPHK1, TAP2, EIF2AK2, UBE2G2, SMC1A, RHOD, ACVR2B, GEM, RHOB, ICK, GAK, CDK9, RRAGA, WEE1, TRPV4, RAB34, ETNK1, ATP13A2, UBA1, SLC22A21, HCN2, SLC27A4, GALK1	483	1754	22680	1.23147	1	1	0.98951
GOTERM_MF_DIRECT	GO:0005524~ATP binding	38	7.14286	0.243938	NDUFA13, GUCY2D, DDX27, SLC22A5, MVK, ACSM3, CHD7, TARS, TTF2, DDX60, CCT6B, CHEK2, DHX35, ASNA1, P2RY1, AKT1, CSK, KIF1A, KIF21B, MAP2K5, TRAP1, SPHK1, TAP2, EIF2AK2, UBE2G2, SMC1A, ACVR2B, ICK, GAK, CDK9, WEE1, P2RX4, TRPV4, ETNK1, ATP13A2, UBA1, SLC22A21, GALK1	381	1507	17446	1.15463	1	1	1
GOTERM_MF_DIRECT	GO:0004715~non-membrane spanning protein tyrosine kinase activity	3	0.56391	0.256829	WEE1, EIF2AK2, CSK	381	45	17446	3.05267	1	1	1
GOTERM_MF_DIRECT	GO:0004713~protein tyrosine kinase activity	5	0.93985	0.270565	WEE1, EIF2AK2, AKT1, CSK, MAP2K5	381	121	17446	1.89215	1	1	1
UP_KEYWORDS	ATP-binding	33	6.20301	0.30358	DDX27, SLC22A5, MVK, ACSM3, CHD7, TARS, TTF2, CCT6B, CHEK2, DHX35, ASNA1, AKT1, CSK, KIF1A, KIF21B, MAP2K5, TRAP1, SPHK1, TAP2, EIF2AK2, UBE2G2, SMC1A, ACVR2B, ICK, GAK, CDK9, WEE1, TRPV4, ETNK1, ATP13A2, UBA1, SLC22A21, GALK1	483	1363	22680	1.13688	1	1	0.98951
UP_SEQ_FEATURE	nucleotide phosphate-binding region:ATP	24	4.51128	0.381684	SLC22A5, DDX27, MVK, ACSM3, CHD7, TAP2, EIF2AK2, TTF2, SMC1A, ACVR2B, CDK9, ICK, GAK, WEE1, CHEK2, ASNA1, AKT1, UBA1, CSK, KIF1A, KIF21B, MAP2K5, SLC22A21, GALK1	399	963	18012	1.12506	1	1	1
UP_KEYWORDS	Magnesium	13	2.44361	0.426704	ITGB1, ACSM3, TAMM41, ACVR2B, GRIN2D, ICK, WEE1, CTDSP1, CHEK2, GNA11, ATP13A2, CSK, MAP2K5	483	521	22680	1.17166	1	1	0.98951
UP_KEYWORDS	Tyrosine-protein kinase	4	0.75188	0.432057	WEE1, EIF2AK2, CSK, MAP2K5	483	113	22680	1.66218	1	1	0.98951
INTERPRO	IPR008271:Serine/threonine-protein kinase, active site	9	1.69173	0.44313	ICK, CDK9, GAK, WEE1, CHEK2, EIF2AK2, AKT1, ACVR2B, MAP2K5	451	333	20594	1.23413	1	1	1
GOTERM_MF_DIRECT	GO:0004672~protein kinase activity	13	2.44361	0.492072	GUCY2D, NPRL2, EIF2AK2, ACVR2B, CDK9, ICK, GAK, WEE1, CHEK2, AKT1, CSK, SOX9, MAP2K5	381	531	17446	1.12104	1	1	1
UP_SEQ_FEATURE	binding site:ATP	14	2.63158	0.527475	TRAP1, MVK, ACSM3, EIF2AK2, ACVR2B, CDK9, ICK, GAK, WEE1, CHEK2, ASNA1, AKT1, CSK, MAP2K5	399	583	18012	1.08405	1	1	1
INTERPRO	IPR011009:Protein kinase-like domain	13	2.44361	0.558552	GUCY2D, EIF2AK2, ACVR2B, CDK9, ICK, GAK, WEE1, CHEK2, ETNK1, AKT1, CSK, ACAD10, MAP2K5	451	556	20594	1.06766	1	1	1
UP_SEQ_FEATURE	active site:Proton acceptor	16	3.00752	0.60805	CNP, EIF2AK2, ACVR2B, CDK9, ICK, GAK, ALDH1A3, DHRS7, WEE1, LDHA, ATIC, CHEK2, AKT1, CSK, ALDH7A1, MAP2K5	399	710	18012	1.0173	1	1	1
GOTERM_BP_DIRECT	GO:0016310~phosphorylation	14	2.63158	0.613616	MVK, SPHK1, EIF2AK2, ACVR2B, CDK9, ICK, GAK, WEE1, CHEK2, ETNK1, AKT1, CSK, MAP2K5, GALK1	405	612	18082	1.02133	1	1	1
INTERPRO	IPR000719:Protein kinase, catalytic domain	11	2.06767	0.69186	ICK, CDK9, GAK, WEE1, GUCY2D, CHEK2, EIF2AK2, AKT1, CSK, ACVR2B, MAP2K5	451	515	20594	0.975326	1	1	1
GOTERM_MF_DIRECT	GO:0016301~kinase activity	14	2.63158	0.712361	MVK, SPHK1, EIF2AK2, ACVR2B, CDK9, ICK, GAK, WEE1, CHEK2, ETNK1, AKT1, CSK, MAP2K5, GALK1	381	674	17446	0.951128	1	1	1
UP_KEYWORDS	Kinase	14	2.63158	0.741112	MVK, SPHK1, EIF2AK2, ACVR2B, CDK9, ICK, GAK, WEE1, CHEK2, ETNK1, AKT1, CSK, MAP2K5, GALK1	483	707	22680	0.929832	1	1	0.98951
SMART	SM00220:S_TKc	8	1.50376	0.758801	ICK, CDK9, GAK, WEE1, CHEK2, EIF2AK2, AKT1, MAP2K5	236	380	10425	0.929973	1	1	1
UP_KEYWORDS	Serine/threonine-protein kinase	8	1.50376	0.760368	ICK, CDK9, GAK, CHEK2, EIF2AK2, AKT1, ACVR2B, MAP2K5	483	405	22680	0.927536	1	1	0.98951
UP_SEQ_FEATURE	domain:Protein kinase	10	1.8797	0.782873	ICK, CDK9, GAK, WEE1, CHEK2, EIF2AK2, AKT1, CSK, ACVR2B, MAP2K5	399	502	18012	0.89926	1	1	1
GOTERM_MF_DIRECT	GO:0004674~protein serine/threonine kinase activity	8	1.50376	0.827348	ICK, CDK9, GAK, CHEK2, EIF2AK2, AKT1, ACVR2B, MAP2K5	381	428	17446	0.855888	1	1	1
INTERPRO	IPR017441:Protein kinase, ATP binding site	7	1.31579	0.863776	ICK, CDK9, WEE1, EIF2AK2, AKT1, CSK, MAP2K5	451	394	20594	0.811271	1	1	1
GOTERM_BP_DIRECT	GO:0006468~protein phosphorylation	10	1.8797	0.900463	ICK, CDK9, GAK, WEE1, CHEK2, EIF2AK2, AKT1, CSK, ACVR2B, MAP2K5	405	576	18082	0.77512	1	1	1
Annotation Cluster 50	Enrichment Score: 0.3415814884964989
Category	Term	Count	%	PValue	Genes	List Total	Pop Hits	Pop Total	Fold Enrichment	Bonferroni	Benjamini	FDR
GOTERM_BP_DIRECT	GO:0055085~transmembrane transport	13	2.44361	0.116082	SLC46A1, SLC22A5, TAP2, SLC8A2, SLC22A16, SLC25A19, TRPV4, SLC18B1, SLC25A23, SLC22A21, SLC12A8, HCN2, SLC25A13	405	364	18082	1.59453	1	1	1
GOTERM_BP_DIRECT	GO:0006811~ion transport	13	2.44361	0.657426	SLC22A5, CLIC3, ATP8, ATP5H, SLC8A2, GRIN2D, P2RX4, CACNB4, SLC22A16, TRPV4, SLC22A21, SLC12A8, HCN2	405	584	18082	0.993853	1	1	1
UP_KEYWORDS	Ion transport	13	2.44361	0.667638	SLC22A5, CLIC3, ATP8, ATP5H, SLC8A2, GRIN2D, P2RX4, CACNB4, SLC22A16, TRPV4, SLC22A21, SLC12A8, HCN2	483	619	22680	0.986163	1	1	0.98951
UP_KEYWORDS	Ion channel	6	1.12782	0.844344	P2RX4, CACNB4, CLIC3, TRPV4, HCN2, GRIN2D	483	336	22680	0.838509	1	1	0.98951
Annotation Cluster 51	Enrichment Score: 0.33527547320115597
Category	Term	Count	%	PValue	Genes	List Total	Pop Hits	Pop Total	Fold Enrichment	Bonferroni	Benjamini	FDR
UP_KEYWORDS	Synapse	10	1.8797	0.347438	NLGN3, CHRM2, SCAMP5, ENAH, MPST, RUSC1, CLSTN1, TMEM230, CBLN1, GRIN2D	483	357	22680	1.31531	1	1	0.98951
UP_KEYWORDS	Postsynaptic cell membrane	5	0.93985	0.516478	CHRM2, RUSC1, CLSTN1, CBLN1, GRIN2D	483	176	22680	1.33399	1	1	0.98951
GOTERM_CC_DIRECT	GO:0045211~postsynaptic membrane	6	1.12782	0.54985	CHRM2, RUSC1, CLSTN1, P2RY1, CBLN1, GRIN2D	435	222	19662	1.22162	1	1	1
Annotation Cluster 52	Enrichment Score: 0.32551827589051857
Category	Term	Count	%	PValue	Genes	List Total	Pop Hits	Pop Total	Fold Enrichment	Bonferroni	Benjamini	FDR
KEGG_PATHWAY	mmu03013:RNA transport	6	1.12782	0.327084	NUP93, ALYREF, RNPS1, ALYREF2, EIF4E2, EIF1B	172	170	7691	1.57818	1	1	1
UP_KEYWORDS	mRNA transport	3	0.56391	0.548419	NUP93, ALYREF, ALYREF2	483	86	22680	1.63802	1	1	0.98951
GOTERM_BP_DIRECT	GO:0051028~mRNA transport	3	0.56391	0.588401	NUP93, ALYREF, ALYREF2	405	88	18082	1.52205	1	1	1
Annotation Cluster 53	Enrichment Score: 0.31594152010982873
Category	Term	Count	%	PValue	Genes	List Total	Pop Hits	Pop Total	Fold Enrichment	Bonferroni	Benjamini	FDR
UP_KEYWORDS	Endoplasmic reticulum	25	4.69925	0.294292	RPN2, CLSTN1, XYLT1, HMGCR, TXNDC16, HERPUD1, FGD5, ASNA1, SPTSSA, SEC61B, SERAC1, RHBDF1, RAB2B, HACE1, SRD5A3, TAP2, PARP16, CREB3, ARMC10, SELM, PIGA, LDAH, PIGF, TLR3, SLC27A4	483	997	22680	1.17745	1	1	0.98951
GOTERM_CC_DIRECT	GO:0005783~endoplasmic reticulum	30	5.6391	0.543667	RPN2, CLSTN1, XYLT1, HMGCR, HERPUD1, NCSTN, FGD5, NKRF, ASNA1, SPTSSA, SEC61B, SERAC1, RHBDF1, RAB2B, PLA2G12A, HACE1, SRD5A3, TAP2, PARP16, UBE2G2, CREB3, ARMC10, SELM, TMEM117, PIGA, MGP, LDAH, PIGF, TLR3, SLC27A4	435	1323	19662	1.02494	1	1	1
GOTERM_CC_DIRECT	GO:0005789~endoplasmic reticulum membrane	15	2.81955	0.704797	RHBDF1, RAB2B, SRD5A3, CLSTN1, XYLT1, PARP16, HMGCR, HERPUD1, CREB3, ARMC10, PIGA, PIGF, TLR3, SLC27A4, TMPO	435	710	19662	0.95493	1	1	1
Annotation Cluster 54	Enrichment Score: 0.3154623981350356
Category	Term	Count	%	PValue	Genes	List Total	Pop Hits	Pop Total	Fold Enrichment	Bonferroni	Benjamini	FDR
UP_KEYWORDS	LIM domain	3	0.56391	0.468497	LMO1, WTIP, GM4907	483	74	22680	1.90364	1	1	0.98951
INTERPRO	IPR001781:Zinc finger, LIM-type	3	0.56391	0.483071	LMO1, WTIP, GM4907	451	74	20594	1.8512	1	1	1
SMART	SM00132:LIM	3	0.56391	0.499914	LMO1, WTIP, GM4907	236	74	10425	1.79083	1	1	1
Annotation Cluster 55	Enrichment Score: 0.30567447427407246
Category	Term	Count	%	PValue	Genes	List Total	Pop Hits	Pop Total	Fold Enrichment	Bonferroni	Benjamini	FDR
INTERPRO	IPR015919:Cadherin-like	5	0.93985	0.301787	PCDHB19, SGCA, CDHR2, CLSTN1, PCDHB20	451	127	20594	1.79775	1	1	1
GOTERM_BP_DIRECT	GO:0007156~homophilic cell adhesion via plasma membrane adhesion molecules	5	0.93985	0.495773	PTPRT, PCDHB19, CDHR2, CLSTN1, PCDHB20	405	163	18082	1.36954	1	1	1
INTERPRO	IPR002126:Cadherin	4	0.75188	0.516525	PCDHB19, CDHR2, CLSTN1, PCDHB20	451	125	20594	1.46122	1	1	1
SMART	SM00112:CA	4	0.75188	0.532684	PCDHB19, CDHR2, CLSTN1, PCDHB20	236	124	10425	1.42496	1	1	1
INTERPRO	IPR020894:Cadherin conserved site	3	0.56391	0.719587	PCDHB19, CDHR2, PCDHB20	451	115	20594	1.19121	1	1	1
Annotation Cluster 56	Enrichment Score: 0.28345207954686175
Category	Term	Count	%	PValue	Genes	List Total	Pop Hits	Pop Total	Fold Enrichment	Bonferroni	Benjamini	FDR
UP_KEYWORDS	SH3 domain	6	1.12782	0.454066	SPTA1, CACNB4, RUSC1, CSK, ARHGEF5, BCAR1	483	208	22680	1.35452	1	1	0.98951
INTERPRO	IPR001452:Src homology-3 domain	6	1.12782	0.49449	SPTA1, CACNB4, RUSC1, CSK, ARHGEF5, BCAR1	451	212	20594	1.29235	1	1	1
UP_SEQ_FEATURE	domain:SH3	5	0.93985	0.50135	SPTA1, CACNB4, RUSC1, CSK, BCAR1	399	166	18012	1.35972	1	1	1
SMART	SM00326:SH3	5	0.93985	0.652791	SPTA1, RUSC1, CSK, ARHGEF5, BCAR1	236	197	10425	1.12116	1	1	1
Annotation Cluster 57	Enrichment Score: 0.2580830652722965
Category	Term	Count	%	PValue	Genes	List Total	Pop Hits	Pop Total	Fold Enrichment	Bonferroni	Benjamini	FDR
UP_SEQ_FEATURE	domain:PDZ	4	0.75188	0.386628	STXBP4, HTRA2, SIPA1L2, GRASP	399	101	18012	1.78784	1	1	1
INTERPRO	IPR001478:PDZ domain	4	0.75188	0.657418	STXBP4, HTRA2, SIPA1L2, GRASP	451	154	20594	1.18605	1	1	1
SMART	SM00228:PDZ	4	0.75188	0.661632	STXBP4, HTRA2, SIPA1L2, GRASP	236	150	10425	1.17797	1	1	1
Annotation Cluster 58	Enrichment Score: 0.2429344629947362
Category	Term	Count	%	PValue	Genes	List Total	Pop Hits	Pop Total	Fold Enrichment	Bonferroni	Benjamini	FDR
UP_SEQ_FEATURE	repeat:WD 3	7	1.31579	0.449484	BCAS3, FBXW8, WDR19, KIF21B, MED16, CORO1A, TAF5L	399	243	18012	1.30041	1	1	1
UP_KEYWORDS	WD repeat	7	1.31579	0.462542	BCAS3, FBXW8, WDR19, KIF21B, MED16, CORO1A, TAF5L	483	256	22680	1.28397	1	1	0.98951
UP_SEQ_FEATURE	repeat:WD 1	7	1.31579	0.468261	BCAS3, FBXW8, WDR19, KIF21B, MED16, CORO1A, TAF5L	399	248	18012	1.27419	1	1	1
UP_SEQ_FEATURE	repeat:WD 2	7	1.31579	0.468261	BCAS3, FBXW8, WDR19, KIF21B, MED16, CORO1A, TAF5L	399	248	18012	1.27419	1	1	1
UP_SEQ_FEATURE	repeat:WD 5	6	1.12782	0.500662	FBXW8, WDR19, KIF21B, MED16, CORO1A, TAF5L	399	211	18012	1.28368	1	1	1
INTERPRO	IPR017986:WD40-repeat-containing domain	8	1.50376	0.507745	BCAS3, FBXW8, WDR19, KIF21B, MED16, CORO1A, TECPR2, TAF5L	451	307	20594	1.18991	1	1	1
UP_SEQ_FEATURE	repeat:WD 4	6	1.12782	0.577081	FBXW8, WDR19, KIF21B, MED16, CORO1A, TAF5L	399	230	18012	1.17764	1	1	1
INTERPRO	IPR015943:WD40/YVTN repeat-like-containing domain	8	1.50376	0.615953	BCAS3, FBXW8, WDR19, KIF21B, MED16, CORO1A, TECPR2, TAF5L	451	340	20594	1.07442	1	1	1
INTERPRO	IPR001680:WD40 repeat	6	1.12782	0.684052	FBXW8, WDR19, KIF21B, MED16, CORO1A, TAF5L	451	263	20594	1.04174	1	1	1
INTERPRO	IPR019775:WD40 repeat, conserved site	4	0.75188	0.686635	FBXW8, KIF21B, CORO1A, TAF5L	451	161	20594	1.13448	1	1	1
SMART	SM00320:WD40	6	1.12782	0.7085	FBXW8, WDR19, KIF21B, MED16, CORO1A, TAF5L	236	262	10425	1.01161	1	1	1
UP_SEQ_FEATURE	repeat:WD 6	3	0.56391	0.886778	WDR19, KIF21B, TAF5L	399	167	18012	0.81095	1	1	1
Annotation Cluster 59	Enrichment Score: 0.1999663152709832
Category	Term	Count	%	PValue	Genes	List Total	Pop Hits	Pop Total	Fold Enrichment	Bonferroni	Benjamini	FDR
INTERPRO	IPR011011:Zinc finger, FYVE/PHD-type	4	0.75188	0.573597	ZFYVE28, KDM4A, KMT2B, TAF3	451	136	20594	1.34303	1	1	1
INTERPRO	IPR001965:Zinc finger, PHD-type	3	0.56391	0.594419	KDM4A, KMT2B, TAF3	451	91	20594	1.50537	1	1	1
SMART	SM00249:PHD	3	0.56391	0.61207	KDM4A, KMT2B, TAF3	236	91	10425	1.45628	1	1	1
INTERPRO	IPR013083:Zinc finger, RING/FYVE/PHD-type	9	1.69173	0.759686	ZFYVE28, KDM4A, FGD5, TRIM7, TRAF5, KMT2B, TRIM27, TAF3, TRIM65	451	445	20594	0.923521	1	1	1
Annotation Cluster 60	Enrichment Score: 0.19800955470532325
Category	Term	Count	%	PValue	Genes	List Total	Pop Hits	Pop Total	Fold Enrichment	Bonferroni	Benjamini	FDR
UP_KEYWORDS	Protein phosphatase	4	0.75188	0.524122	PTPRT, CTDSP1, DUSP6, TNS2	483	130	22680	1.44482	1	1	0.98951
UP_SEQ_FEATURE	active site:Phosphocysteine intermediate	3	0.56391	0.556992	PTPRT, DUSP6, TNS2	399	84	18012	1.61224	1	1	1
GOTERM_MF_DIRECT	GO:0004721~phosphoprotein phosphatase activity	4	0.75188	0.586387	PTPRT, CTDSP1, DUSP6, TNS2	381	139	17446	1.3177	1	1	1
GOTERM_MF_DIRECT	GO:0016791~phosphatase activity	3	0.56391	0.731245	PTPRT, CTDSP1, DUSP6	381	118	17446	1.16415	1	1	1
GOTERM_BP_DIRECT	GO:0006470~protein dephosphorylation	3	0.56391	0.817378	PTPRT, CTDSP1, DUSP6	405	138	18082	0.970585	1	1	1
Annotation Cluster 61	Enrichment Score: 0.1840809176308265
Category	Term	Count	%	PValue	Genes	List Total	Pop Hits	Pop Total	Fold Enrichment	Bonferroni	Benjamini	FDR
UP_KEYWORDS	Ligand-gated ion channel	3	0.56391	0.461463	P2RX4, HCN2, GRIN2D	483	73	22680	1.92972	1	1	0.98951
GOTERM_MF_DIRECT	GO:0005216~ion channel activity	4	0.75188	0.719617	P2RX4, TRPV4, HCN2, GRIN2D	381	170	17446	1.07741	1	1	1
UP_KEYWORDS	Ion channel	6	1.12782	0.844344	P2RX4, CACNB4, CLIC3, TRPV4, HCN2, GRIN2D	483	336	22680	0.838509	1	1	0.98951
Annotation Cluster 62	Enrichment Score: 0.1779804826577363
Category	Term	Count	%	PValue	Genes	List Total	Pop Hits	Pop Total	Fold Enrichment	Bonferroni	Benjamini	FDR
UP_SEQ_FEATURE	domain:SH2	3	0.56391	0.61248	BCAR3, CSK, TNS2	399	93	18012	1.45622	1	1	1
UP_KEYWORDS	SH2 domain	3	0.56391	0.656885	BCAR3, CSK, TNS2	483	105	22680	1.34161	1	1	0.98951
SMART	SM00252:SH2	3	0.56391	0.679058	BCAR3, CSK, TNS2	236	103	10425	1.28661	1	1	1
INTERPRO	IPR000980:SH2 domain	3	0.56391	0.710542	BCAR3, CSK, TNS2	451	113	20594	1.21229	1	1	1
Annotation Cluster 63	Enrichment Score: 0.16968315491778696
Category	Term	Count	%	PValue	Genes	List Total	Pop Hits	Pop Total	Fold Enrichment	Bonferroni	Benjamini	FDR
GOTERM_MF_DIRECT	GO:0008237~metallopeptidase activity	5	0.93985	0.461755	AGBL2, ADAMTSL2, LNPEP, CPA6, MYSM1	381	160	17446	1.43094	1	1	1
UP_KEYWORDS	Metalloprotease	4	0.75188	0.588693	AGBL2, LNPEP, CPA6, MYSM1	483	143	22680	1.31347	1	1	0.98951
GOTERM_MF_DIRECT	GO:0008233~peptidase activity	11	2.06767	0.690927	OTUB2, NCSTN, CAPN11, AGBL2, ADAMTSL2, HTRA2, TYSND1, LNPEP, CPA6, MYSM1, LGMN	381	516	17446	0.976144	1	1	1
UP_SEQ_FEATURE	metal ion-binding site:Zinc; catalytic	3	0.56391	0.742716	LNPEP, CPA6, MYSM1	399	119	18012	1.13806	1	1	1
UP_KEYWORDS	Protease	10	1.8797	0.81696	RHBDF1, OTUB2, CAPN11, AGBL2, HTRA2, TYSND1, LNPEP, CPA6, MYSM1, LGMN	483	542	22680	0.866356	1	1	0.98951
GOTERM_BP_DIRECT	GO:0006508~proteolysis	11	2.06767	0.841675	RHBDF1, OTUB2, CAPN11, 4930486L24RIK, AGBL2, HTRA2, TYSND1, LNPEP, CPA6, MYSM1, LGMN	405	582	18082	0.843842	1	1	1
Annotation Cluster 64	Enrichment Score: 0.16528094251327916
Category	Term	Count	%	PValue	Genes	List Total	Pop Hits	Pop Total	Fold Enrichment	Bonferroni	Benjamini	FDR
GOTERM_BP_DIRECT	GO:0030154~cell differentiation	19	3.57143	0.473033	TNFRSF12A, ODF3, WIPF3, PDX1, CDC5L, PRM3, DUSP6, RHOB, ELK3, ENAH, NGRN, FGF9, SLC22A16, FAM120B, MGP, CDHR2, CSK, SOX9, ANAPC2	405	780	18082	1.08755	1	1	1
UP_KEYWORDS	Differentiation	13	2.44361	0.722569	TNFRSF12A, ODF3, WIPF3, PRM3, RHOB, ENAH, NGRN, FGF9, SLC22A16, FAM120B, MGP, CDHR2, ANAPC2	483	646	22680	0.944945	1	1	0.98951
UP_KEYWORDS	Developmental protein	19	3.57143	0.764355	ADGRV1, TNFRSF12A, LDB1, ODF3, FLII, WIPF3, PDX1, PRDM1, PRM3, RHOB, ENAH, ICK, NGRN, FGF9, SLC22A16, MAB21L1, MGP, SNAI1, AKT1	483	976	22680	0.914113	1	1	0.98951
GOTERM_BP_DIRECT	GO:0007275~multicellular organism development	20	3.7594	0.835238	ADGRV1, TNFRSF12A, LDB1, ODF3, FLII, WIPF3, PDX1, PRDM1, PRM3, RHOB, ENAH, ICK, NGRN, FGF9, SLC22A16, MAB21L1, MGP, SNAI1, HIVEP1, AKT1	405	1029	18082	0.867773	1	1	1
Annotation Cluster 65	Enrichment Score: 0.16259781265773557
Category	Term	Count	%	PValue	Genes	List Total	Pop Hits	Pop Total	Fold Enrichment	Bonferroni	Benjamini	FDR
GOTERM_BP_DIRECT	GO:0051092~positive regulation of NF-kappaB transcription factor activity	5	0.93985	0.226957	SPHK1, TRAF5, EIF2AK2, IL1RAP, TLR3	405	109	18082	2.04802	1	1	1
UP_KEYWORDS	Adaptive immunity	3	0.56391	0.61954	TAP2, CSK, PRDM1	483	98	22680	1.43744	1	1	0.98951
GOTERM_BP_DIRECT	GO:0002250~adaptive immune response	3	0.56391	0.820498	TAP2, CSK, PRDM1	405	139	18082	0.963602	1	1	1
GOTERM_BP_DIRECT	GO:0002376~immune system process	7	1.31579	0.860366	TAP2, EIF2AK2, CSK, IL1RAP, AHR, PRDM1, TLR3	405	383	18082	0.816001	1	1	1
GOTERM_BP_DIRECT	GO:0045087~innate immune response	7	1.31579	0.885905	EIF2AK2, CSK, IL1RAP, TRIM27, PRDM1, IFNL3, TLR3	405	400	18082	0.781321	1	1	1
UP_KEYWORDS	Innate immunity	4	0.75188	0.889131	EIF2AK2, IL1RAP, PRDM1, TLR3	483	241	22680	0.779361	1	1	0.98951
UP_KEYWORDS	Immunity	6	1.12782	0.930442	TAP2, EIF2AK2, CSK, IL1RAP, PRDM1, TLR3	483	401	22680	0.702591	1	1	0.98951
Annotation Cluster 66	Enrichment Score: 0.1582827689342246
Category	Term	Count	%	PValue	Genes	List Total	Pop Hits	Pop Total	Fold Enrichment	Bonferroni	Benjamini	FDR
GOTERM_CC_DIRECT	GO:0005694~chromosome	9	1.69173	0.486142	H1FOO, H1F0, DDX27, CENPC1, H2AFV, CENPN, SMC1A, PRM3, TMPO	435	344	19662	1.18256	1	1	1
GOTERM_CC_DIRECT	GO:0000776~kinetochore	3	0.56391	0.74627	CENPC1, CENPN, SMC1A	435	120	19662	1.13	1	1	1
UP_KEYWORDS	Centromere	3	0.56391	0.7811	CENPC1, CENPN, SMC1A	483	134	22680	1.05127	1	1	0.98951
GOTERM_CC_DIRECT	GO:0000775~chromosome, centromeric region	3	0.56391	0.821302	CENPC1, CENPN, SMC1A	435	141	19662	0.961702	1	1	1
Annotation Cluster 67	Enrichment Score: 0.14338135733527613
Category	Term	Count	%	PValue	Genes	List Total	Pop Hits	Pop Total	Fold Enrichment	Bonferroni	Benjamini	FDR
GOTERM_CC_DIRECT	GO:0016020~membrane	168	31.5789	0.111647	CHRM2, ANKRD13B, GALNT14, VIPR1, SLC46A1, THSD7B, TAMM41, GALNT18, CTNND1, CLSTN1, ECI2, XYLT1, EMC10, IL1RAP, SLC8A2, RPS15, LAMP5, ZFYVE28, SCAMP5, RGS5, ABHD13, COMTD1, FAM174B, RUSC1, D230025D16RIK, TBC1D30, TOM1, PSMD1, AKT1, SVEP1, SLC12A8, TNS2, CMKLR1, TMPO, RAB2B, TOMM34, TAP2, FRS2, GEM, NUP93, PLA2G15, DOK3, FAM173A, RAB34, ND4, SLC27A4, CDC42SE1, ND6, SLC22A5, RPN2, CNP, ATP8, STXBP1,…	435	6998	19662	1.08511	1	1	1
UP_KEYWORDS	Membrane	177	33.2707	0.803612	CHRM2, OLFR1294, ANKRD13B, GALNT14, VIPR1, NDUFA13, SLC46A1, TMEM200B, THSD7B, TAMM41, GALNT18, CTNND1, CLSTN1, KLHL32, XYLT1, EMC10, IL1RAP, OLFR207, SLC8A2, LAMP5, ZFYVE28, SCAMP5, RGS5, ABHD13, COMTD1, FAM174B, RUSC1, TBC1D30, TOM1, PSMD1, AKT1, SVEP1, DIP2C, SLC12A8, TNS2, CMKLR1, TMPO, RAB2B, TOMM34, TAP2, FRS2, MUC3A, OLFR1441, GEM, OLFR1443, NUP93, PLA2G15, METTL7A1, OLFR954, DOK3, FAM173A…	483	8683	22680	0.957193	1	1	0.98951
UP_SEQ_FEATURE	transmembrane region	87	16.3534	0.878093	ITGB1, CHRM2, PTPRT, SLC35F6, GALNT14, VIPR1, NDUFA13, SLC46A1, CLIC3, THSD7B, GALNT18, CLSTN1, XYLT1, EMC10, IL1RAP, ADRA1B, HERPUD1, LAMP5, SCAMP5, ABHD13, COMTD1, LMBR1, SGCA, SLC22A16, FAM174B, SEC61B, SERAC1, SLC12A8, CMKLR1, TMPO, CHST8, RHBDF1, ADGRV1, TNFRSF12A, ATP6AP2, TAP2, CREB3, FAM173A, SLC25A19, PIGA, CHST4, PIGF, TLR3, SLC22A21, CD44, ND4, SLC27A4, SLC25A13, NLGN3, ND6, FOCAD, SLC…	399	4312	18012	0.910814	1	1	1
UP_SEQ_FEATURE	topological domain:Cytoplasmic	54	10.1504	0.941008	ITGB1, CHRM2, PTPRT, GALNT14, VIPR1, THSD7B, GALNT18, CLSTN1, XYLT1, EMC10, IL1RAP, ADRA1B, LAMP5, SCAMP5, LMBR1, SGCA, FAM174B, SEC61B, CMKLR1, CHST8, RHBDF1, ADGRV1, TNFRSF12A, ATP6AP2, TAP2, CREB3, PIGA, CHST4, TLR3, SLC22A21, CD44, NLGN3, SLC22A5, RPN2, SDC3, SNN, NCSTN, MARVELD1, P2RY1, SPTSSA, IL11RA1, VMN1R46, CTNS, LNPEP, ACVR2B, GRIN2D, P2RX4, OSTM1, TRPV4, CLEC2G, ATP13A2, CD248, SKINT5…	399	2880	18012	0.846429	1	1	1
UP_SEQ_FEATURE	topological domain:Extracellular	38	7.14286	0.982645	PTPRT, ITGB1, NLGN3, CHRM2, VIPR1, SLC22A5, THSD7B, CLSTN1, SDC3, EMC10, IL1RAP, ADRA1B, LAMP5, SCAMP5, NCSTN, LMBR1, SGCA, MARVELD1, FAM174B, P2RY1, IL11RA1, CMKLR1, ADGRV1, TNFRSF12A, VMN1R46, ATP6AP2, LNPEP, ACVR2B, GRIN2D, P2RX4, OSTM1, TRPV4, CLEC2G, ATP13A2, CD248, SKINT5, SLC22A21, CD44	399	2256	18012	0.760385	1	1	1
UP_KEYWORDS	Transmembrane helix	126	23.6842	0.989888	CHRM2, OLFR1294, GALNT14, VIPR1, NDUFA13, SLC46A1, TMEM200B, THSD7B, GALNT18, CLSTN1, KLHL32, XYLT1, EMC10, IL1RAP, OLFR207, SLC8A2, LAMP5, SCAMP5, ABHD13, COMTD1, FAM174B, PSMD1, DIP2C, SLC12A8, CMKLR1, TMPO, TAP2, MUC3A, OLFR1441, OLFR1443, METTL7A1, OLFR954, FAM173A, ND4, SLC27A4, ND6, SLC22A5, RPN2, ATP8, H2-M3, SDC3, HTRA2, SNN, NCSTN, LDHA, AI413582, IL11RA1, OLFR1383, 4930512M02RIK, SMLR1,…	483	6938	22680	0.852771	1	1	0.989888
UP_KEYWORDS	Transmembrane	126	23.6842	0.990805	CHRM2, OLFR1294, GALNT14, VIPR1, NDUFA13, SLC46A1, TMEM200B, THSD7B, GALNT18, CLSTN1, KLHL32, XYLT1, EMC10, IL1RAP, OLFR207, SLC8A2, LAMP5, SCAMP5, ABHD13, COMTD1, FAM174B, PSMD1, DIP2C, SLC12A8, CMKLR1, TMPO, TAP2, MUC3A, OLFR1441, OLFR1443, METTL7A1, OLFR954, FAM173A, ND4, SLC27A4, ND6, SLC22A5, RPN2, ATP8, H2-M3, SDC3, HTRA2, SNN, NCSTN, LDHA, AI413582, IL11RA1, OLFR1383, 4930512M02RIK, SMLR1,…	483	6955	22680	0.850686	1	1	0.990805
GOTERM_CC_DIRECT	GO:0016021~integral component of membrane	126	23.6842	0.997587	CHRM2, OLFR1294, GALNT14, VIPR1, NDUFA13, SLC46A1, TMEM200B, THSD7B, GALNT18, CLSTN1, KLHL32, XYLT1, EMC10, IL1RAP, OLFR207, SLC8A2, LAMP5, SCAMP5, ABHD13, COMTD1, FAM174B, PSMD1, DIP2C, SLC12A8, CMKLR1, TMPO, TAP2, MUC3A, OLFR1441, OLFR1443, METTL7A1, OLFR954, FAM173A, ND4, SLC27A4, ND6, SLC22A5, RPN2, ATP8, H2-M3, SDC3, HTRA2, SNN, NCSTN, LDHA, AI413582, IL11RA1, OLFR1383, 4930512M02RIK, SMLR1,…	435	6878	19662	0.828031	1	1	1
Annotation Cluster 68	Enrichment Score: 0.13678535693383043
Category	Term	Count	%	PValue	Genes	List Total	Pop Hits	Pop Total	Fold Enrichment	Bonferroni	Benjamini	FDR
UP_KEYWORDS	Sodium transport	3	0.56391	0.695912	SLC22A5, HCN2, SLC8A2	483	113	22680	1.24663	1	1	0.98951
UP_KEYWORDS	Sodium	3	0.56391	0.726985	SLC22A5, HCN2, SLC8A2	483	120	22680	1.17391	1	1	0.98951
GOTERM_BP_DIRECT	GO:0006814~sodium ion transport	3	0.56391	0.768359	SLC22A5, HCN2, SLC8A2	405	124	18082	1.08017	1	1	1
Annotation Cluster 69	Enrichment Score: 0.13274340438029902
Category	Term	Count	%	PValue	Genes	List Total	Pop Hits	Pop Total	Fold Enrichment	Bonferroni	Benjamini	FDR
UP_SEQ_FEATURE	propeptide:Removed in mature form	6	1.12782	0.607422	CD24A, EFNA2, RASD1, FOLR1, RHOD, RHOB	399	238	18012	1.13806	1	1	1
UP_KEYWORDS	GPI-anchor	3	0.56391	0.801264	CD24A, EFNA2, FOLR1	483	140	22680	1.00621	1	1	0.98951
GOTERM_CC_DIRECT	GO:0031225~anchored component of membrane	3	0.56391	0.821302	CD24A, EFNA2, FOLR1	435	141	19662	0.961702	1	1	1
Annotation Cluster 70	Enrichment Score: 0.09262258997766089
Category	Term	Count	%	PValue	Genes	List Total	Pop Hits	Pop Total	Fold Enrichment	Bonferroni	Benjamini	FDR
UP_KEYWORDS	Voltage-gated channel	3	0.56391	0.788013	CACNB4, CLIC3, HCN2	483	136	22680	1.03581	1	1	0.98951
GOTERM_MF_DIRECT	GO:0005244~voltage-gated ion channel activity	3	0.56391	0.792854	CACNB4, CLIC3, HCN2	381	134	17446	1.02515	1	1	1
GOTERM_BP_DIRECT	GO:0034765~regulation of ion transmembrane transport	3	0.56391	0.807726	CACNB4, CLIC3, HCN2	405	135	18082	0.992154	1	1	1
UP_KEYWORDS	Ion channel	6	1.12782	0.844344	P2RX4, CACNB4, CLIC3, TRPV4, HCN2, GRIN2D	483	336	22680	0.838509	1	1	0.98951
Annotation Cluster 71	Enrichment Score: 0.0921449664924312
Category	Term	Count	%	PValue	Genes	List Total	Pop Hits	Pop Total	Fold Enrichment	Bonferroni	Benjamini	FDR
GOTERM_BP_DIRECT	GO:0050731~positive regulation of peptidyl-tyrosine phosphorylation	3	0.56391	0.663194	ITGB1, CD24A, CD44	405	101	18082	1.32615	1	1	1
GOTERM_BP_DIRECT	GO:0031175~neuron projection development	3	0.56391	0.820498	ITGB1, CD24A, CD44	405	139	18082	0.963602	1	1	1
GOTERM_CC_DIRECT	GO:0009897~external side of plasma membrane	4	0.75188	0.972405	ITGB1, CD24A, H2-M3, CD44	435	317	19662	0.570347	1	1	1
Annotation Cluster 72	Enrichment Score: 0.08855013041613646
Category	Term	Count	%	PValue	Genes	List Total	Pop Hits	Pop Total	Fold Enrichment	Bonferroni	Benjamini	FDR
GOTERM_CC_DIRECT	GO:0005576~extracellular region	38	7.14286	0.638428	PNP2, ELN, CLSTN1, EMC10, IL1RAP, TXNDC16, NTN3, FSTL3, GPI1, NGRN, FGF9, ADAMTSL2, CCL27A, AI413582, SVAL1, SVEP1, TIMP1, CPA6, IFNL3, POSTN, PLA2G12A, ADGRV1, ANXA2, GLYCAM1, NPFF, CLEC11A, S100B, SOD3, PLA2G15, METTL24, COL5A1, 4930486L24RIK, FGF18, COL6A1, MGP, FGF13, FOLR1, CBLN1	435	1753	19662	0.979806	1	1	1
UP_KEYWORDS	Secreted	33	6.20301	0.772317	ELN, EMC10, IL1RAP, TXNDC16, NTN3, FSTL3, GPI1, NGRN, FGF9, ADAMTSL2, CCL27A, AI413582, SVEP1, TIMP1, CPA6, IFNL3, POSTN, PLA2G12A, ADGRV1, ANXA2, NPFF, CLEC11A, SOD3, PLA2G15, METTL24, COL5A1, 4930486L24RIK, COL5A3, FGF18, COL6A1, MGP, FOLR1, CBLN1	483	1685	22680	0.919623	1	1	0.98951
UP_SEQ_FEATURE	signal peptide	61	11.4662	0.900679	ITGB1, PTPRT, SLC35F6, VIPR1, THSD7B, ELN, CLSTN1, EMC10, IL1RAP, TXNDC16, LAMP5, SGCA, FAM174B, ADAMTSL2, CCL27A, SVEP1, TIMP1, TCRG-V1, POSTN, PLA2G12A, ADGRV1, TNFRSF12A, NHLRC3, NPFF, CLEC11A, ATP6AP2, PLA2G15, METTL24, 4930486L24RIK, COL6A1, TLR3, CD44, NLGN3, RPN2, H2-M3, SDC3, NTN3, FSTL3, NCSTN, AI413582, CPA6, IFNL3, IL11RA1, GLYCAM1, SOD3, ACVR2B, GRIN2D, GALNS, CD24A, DHRS7, EFNA2, COL…	399	3124	18012	0.881471	1	1	1
GOTERM_CC_DIRECT	GO:0005615~extracellular space	21	3.94737	0.996143	POSTN, ANXA2, CNP, NPFF, CLEC11A, S100B, SOD3, FSTL3, PLA2G15, GPI1, FABP3, FGF9, 4930486L24RIK, MGP, CCL27A, CLEC2G, TIMP1, SCGB2B15, RPS27A, CPA6, IFNL3	435	1504	19662	0.631117	1	1	1
Annotation Cluster 73	Enrichment Score: 0.08125102473007677
Category	Term	Count	%	PValue	Genes	List Total	Pop Hits	Pop Total	Fold Enrichment	Bonferroni	Benjamini	FDR
UP_KEYWORDS	Leucine-rich repeat	6	1.12782	0.697938	FLII, LRRC39, PPP1R42, FBXL15, TLR3, FBXL6	483	275	22680	1.02451	1	1	0.98951
UP_SEQ_FEATURE	repeat:LRR 9	3	0.56391	0.759044	FLII, LRRC39, TLR3	399	123	18012	1.10105	1	1	1
UP_SEQ_FEATURE	repeat:LRR 6	4	0.75188	0.797221	FLII, LRRC39, PPP1R42, TLR3	399	191	18012	0.9454	1	1	1
UP_SEQ_FEATURE	repeat:LRR 8	3	0.56391	0.799396	FLII, LRRC39, TLR3	399	134	18012	1.01066	1	1	1
UP_SEQ_FEATURE	repeat:LRR 3	5	0.93985	0.813449	FLII, LRRC39, PPP1R42, TLR3, FBXL6	399	253	18012	0.892151	1	1	1
INTERPRO	IPR001611:Leucine-rich repeat	5	0.93985	0.820562	FLII, LRRC39, PPP1R42, FBXL15, TLR3	451	259	20594	0.881525	1	1	1
UP_SEQ_FEATURE	repeat:LRR 5	4	0.75188	0.846238	FLII, LRRC39, PPP1R42, TLR3	399	210	18012	0.859864	1	1	1
UP_SEQ_FEATURE	repeat:LRR 1	5	0.93985	0.858546	FLII, LRRC39, PPP1R42, TLR3, FBXL6	399	274	18012	0.823775	1	1	1
UP_SEQ_FEATURE	repeat:LRR 2	5	0.93985	0.858546	FLII, LRRC39, PPP1R42, TLR3, FBXL6	399	274	18012	0.823775	1	1	1
UP_SEQ_FEATURE	repeat:LRR 7	3	0.56391	0.867277	FLII, LRRC39, TLR3	399	158	18012	0.857143	1	1	1
UP_SEQ_FEATURE	repeat:LRR 4	4	0.75188	0.882858	FLII, LRRC39, PPP1R42, TLR3	399	228	18012	0.79198	1	1	1
INTERPRO	IPR003591:Leucine-rich repeat, typical subtype	3	0.56391	0.898214	FLII, LRRC39, TLR3	451	175	20594	0.782794	1	1	1
SMART	SM00369:LRR_TYP	3	0.56391	0.908704	FLII, LRRC39, TLR3	236	175	10425	0.757264	1	1	1
Annotation Cluster 74	Enrichment Score: 0.036527227299366846
Category	Term	Count	%	PValue	Genes	List Total	Pop Hits	Pop Total	Fold Enrichment	Bonferroni	Benjamini	FDR
INTERPRO	IPR009057:Homeodomain-like	6	1.12782	0.875627	IRX2, PDX1, CDC5L, MYSM1, NKX3-2, POU5F2	451	345	20594	0.794139	1	1	1
UP_SEQ_FEATURE	DNA-binding region:Homeobox	3	0.56391	0.910301	PDX1, NKX3-2, POU5F2	399	180	18012	0.752381	1	1	1
INTERPRO	IPR017970:Homeobox, conserved site	3	0.56391	0.913266	IRX2, PDX1, NKX3-2	451	184	20594	0.744505	1	1	1
INTERPRO	IPR001356:Homeodomain	4	0.75188	0.937651	IRX2, PDX1, NKX3-2, POU5F2	451	271	20594	0.673992	1	1	1
UP_KEYWORDS	Homeobox	4	0.75188	0.938835	IRX2, PDX1, NKX3-2, POU5F2	483	280	22680	0.670807	1	1	0.98951
SMART	SM00389:HOX	4	0.75188	0.942117	IRX2, PDX1, NKX3-2, POU5F2	236	266	10425	0.664267	1	1	1
Annotation Cluster 75	Enrichment Score: 0.03125382866914744
Category	Term	Count	%	PValue	Genes	List Total	Pop Hits	Pop Total	Fold Enrichment	Bonferroni	Benjamini	FDR
UP_KEYWORDS	Glycoprotein	74	13.9098	0.854873	ITGB1, CHRM2, PTPRT, SLC35F6, VIPR1, SLC46A1, THSD7B, GALNT18, CLSTN1, XYLT1, IL1RAP, ADRA1B, TXNDC16, SLC8A2, LAMP5, NGRN, ABHD13, SGCA, SLC22A16, FGF9, FAM174B, ADAMTSL2, AKT1, SVEP1, TIMP1, CMKLR1, CHST8, RHBDF1, POSTN, NHLRC3, CLEC11A, PLA2G15, CREB3, 4930486L24RIK, FAM173A, COL6A1, CHST4, TLR3, SLC22A21, CD44, NLGN3, SLC22A5, RPN2, SDC3, HMGCR, NTN3, FSTL3, NCSTN, P2RY1, CPA6, IL11RA1, VMN1R…	483	3815	22680	0.910821	1	1	0.98951
UP_SEQ_FEATURE	signal peptide	61	11.4662	0.900679	ITGB1, PTPRT, SLC35F6, VIPR1, THSD7B, ELN, CLSTN1, EMC10, IL1RAP, TXNDC16, LAMP5, SGCA, FAM174B, ADAMTSL2, CCL27A, SVEP1, TIMP1, TCRG-V1, POSTN, PLA2G12A, ADGRV1, TNFRSF12A, NHLRC3, NPFF, CLEC11A, ATP6AP2, PLA2G15, METTL24, 4930486L24RIK, COL6A1, TLR3, CD44, NLGN3, RPN2, H2-M3, SDC3, NTN3, FSTL3, NCSTN, AI413582, CPA6, IFNL3, IL11RA1, GLYCAM1, SOD3, ACVR2B, GRIN2D, GALNS, CD24A, DHRS7, EFNA2, COL…	399	3124	18012	0.881471	1	1	1
UP_KEYWORDS	Signal	86	16.1654	0.918805	ITGB1, PTPRT, SLC35F6, VIPR1, THSD7B, ELN, CLSTN1, EMC10, IL1RAP, TXNDC16, SLC8A2, LAMP5, NGRN, GM1976, SGCA, FAM174B, ADAMTSL2, ZFP120, CCL27A, SVAL1, SVEP1, TIMP1, TCRG-V1, POSTN, PLA2G12A, ADGRV1, TNFRSF12A, NHLRC3, NPFF, CLEC11A, ATP6AP2, TAP2, PLA2G15, METTL24, 4930486L24RIK, DEFB47, BC024139, COL6A1, CDHR2, SCGB2B15, TLR3, CD44, ND4, NLGN3, ND6, INO80E, STOML2, FOCAD, RPN2, H2-M3, SDC3, PCD…	483	4543	22680	0.888897	1	1	0.98951
UP_SEQ_FEATURE	glycosylation site:N-linked (GlcNAc...)	67	12.594	0.956206	ITGB1, CHRM2, PTPRT, SLC35F6, VIPR1, SLC46A1, THSD7B, GALNT18, CLSTN1, XYLT1, IL1RAP, ADRA1B, TXNDC16, LAMP5, ABHD13, SGCA, SLC22A16, FGF9, FAM174B, ADAMTSL2, SVEP1, TIMP1, CMKLR1, CHST8, RHBDF1, POSTN, NHLRC3, PLA2G15, CREB3, 4930486L24RIK, FAM173A, COL6A1, CHST4, TLR3, SLC22A21, CD44, NLGN3, SLC22A5, RPN2, HMGCR, NTN3, FSTL3, NCSTN, P2RY1, CPA6, IL11RA1, VMN1R46, GLYCAM1, CTNS, LNPEP, SOD3, ACV…	399	3563	18012	0.848883	1	1	1
UP_KEYWORDS	Disulfide bond	55	10.3383	0.960481	ITGB1, CHRM2, PTPRT, GALNT14, VIPR1, CLIC3, THSD7B, GALNT18, ELN, XYLT1, IL1RAP, ADRA1B, TXNDC16, ADAMTSL2, CCL27A, AKT1, SVAL1, SVEP1, TIMP1, CMKLR1, POSTN, TNFRSF12A, MGL2, CLEC11A, PLA2G15, 4930486L24RIK, TLR3, CD44, NLGN3, COX19, H2-M3, NTN3, FSTL3, P2RY1, SUSD6, CPA6, IFNL3, IL11RA1, MPST, NDUFA8, VMN1R46, SOD3, ACVR2B, GRIN2D, GALNS, P2RX4, EFNA2, MGP, FGF18, CLEC2G, CD248, SKINT5, FOLR1, L…	483	3124	22680	0.826699	1	1	0.98951
UP_SEQ_FEATURE	disulfide bond	36	6.76692	0.999406	PTPRT, ITGB1, NLGN3, CHRM2, GALNT14, VIPR1, THSD7B, GALNT18, ELN, IL1RAP, ADRA1B, NTN3, FSTL3, P2RY1, ADAMTSL2, CCL27A, SVEP1, TIMP1, CPA6, IL11RA1, CMKLR1, POSTN, TNFRSF12A, VMN1R46, CLEC11A, ACVR2B, SOD3, EFNA2, 4930486L24RIK, MGP, CLEC2G, CD248, SKINT5, TLR3, CD44, CBLN1	399	2510	18012	0.647467	1	1	1
Annotation Cluster 76	Enrichment Score: 0.017702920950782675
Category	Term	Count	%	PValue	Genes	List Total	Pop Hits	Pop Total	Fold Enrichment	Bonferroni	Benjamini	FDR
INTERPRO	IPR000210:BTB/POZ-like	3	0.56391	0.956603	KLHL32, KLHL4, RCBTB1	451	222	20594	0.617067	1	1	1
SMART	SM00225:BTB	3	0.56391	0.959609	KLHL32, KLHL4, RCBTB1	236	218	10425	0.607895	1	1	1
INTERPRO	IPR011333:BTB/POZ fold	3	0.56391	0.963974	KLHL32, KLHL4, RCBTB1	451	232	20594	0.590469	1	1	1
Annotation Cluster 77	Enrichment Score: 0.008424252915554176
Category	Term	Count	%	PValue	Genes	List Total	Pop Hits	Pop Total	Fold Enrichment	Bonferroni	Benjamini	FDR
GOTERM_MF_DIRECT	GO:0004871~signal transducer activity	13	2.44361	0.757163	CHRM2, VIPR1, ADGRV1, VMN1R46, TRADD, IL1RAP, ADRA1B, PLCXD3, GNA11, P2RY1, TRAF5, BCAR1, CMKLR1	381	648	17446	0.918627	1	1	1
GOTERM_MF_DIRECT	GO:0005549~odorant binding	4	0.75188	0.988579	OLFR874, OLFR954, OLFR1441, OLFR1443	381	372	17446	0.492366	1	1	1
UP_KEYWORDS	Receptor	36	6.76692	0.999338	PTPRT, ITGB1, CHRM2, OLFR1294, VIPR1, OLFR1093, AHR, IL1RAP, MED16, ADRA1B, OLFR207, OLFR804, LMBR1, P2RY1, IL11RA1, CMKLR1, TCRG-V1, OLFR1383, ADGRV1, TNFRSF12A, VMN1R46, NR1H2, ATP6AP2, ACVR2B, OLFR1441, OLFR1443, AA986860, GRIN2D, OLFR874, OLFR954, P2RX4, TRAF5, CLEC2G, FOLR1, TLR3, CD44	483	2613	22680	0.646933	1	1	0.999338
GOTERM_BP_DIRECT	GO:0007186~G-protein coupled receptor signaling pathway	22	4.13534	0.999458	CHRM2, OLFR1294, VIPR1, OLFR1383, ADGRV1, VMN1R46, RGS16, OLFR1093, ADRA1B, OLFR1441, OLFR207, OLFR804, OLFR1443, OLFR874, RGS5, OLFR954, NPW, GNA11, P2RY1, RGS7BP, BCAR1, CMKLR1	405	1706	18082	0.575752	1	1	1
UP_KEYWORDS	Transducer	18	3.38346	0.99998	CHRM2, OLFR1294, VIPR1, OLFR1383, ADGRV1, VMN1R46, OLFR1093, ADRA1B, OLFR1441, OLFR207, OLFR804, OLFR1443, OLFR874, PLCXD3, OLFR954, GNA11, P2RY1, CMKLR1	483	1801	22680	0.469304	1	1	0.99998
UP_KEYWORDS	Olfaction	9	1.69173	0.999981	OLFR874, OLFR1294, OLFR1383, OLFR954, OLFR1093, OLFR1441, OLFR207, OLFR804, OLFR1443	483	1158	22680	0.364947	1	1	0.999981
INTERPRO	IPR000725:Olfactory receptor	9	1.69173	0.999988	OLFR874, OLFR1294, OLFR1383, OLFR954, OLFR1093, OLFR1441, OLFR207, OLFR804, OLFR1443	451	1149	20594	0.357673	1	1	1
GOTERM_MF_DIRECT	GO:0004984~olfactory receptor activity	9	1.69173	0.999989	OLFR874, OLFR1294, OLFR1383, OLFR954, OLFR1093, OLFR1441, OLFR207, OLFR804, OLFR1443	381	1154	17446	0.357115	1	1	1
INTERPRO	IPR000276:G protein-coupled receptor, rhodopsin-like	13	2.44361	0.999991	CHRM2, OLFR1294, OLFR1383, OLFR1093, ADRA1B, OLFR1441, OLFR207, OLFR804, OLFR1443, OLFR874, OLFR954, P2RY1, CMKLR1	451	1458	20594	0.407146	1	1	1
GOTERM_BP_DIRECT	GO:0007608~sensory perception of smell	9	1.69173	0.999992	OLFR874, OLFR1294, OLFR1383, OLFR954, OLFR1093, OLFR1441, OLFR207, OLFR804, OLFR1443	405	1143	18082	0.351551	1	1	1
UP_KEYWORDS	G-protein coupled receptor	16	3.00752	0.999994	CHRM2, OLFR1294, VIPR1, OLFR1383, ADGRV1, VMN1R46, OLFR1093, ADRA1B, OLFR1441, OLFR207, OLFR804, OLFR1443, OLFR874, OLFR954, P2RY1, CMKLR1	483	1741	22680	0.431536	1	1	0.999994
UP_KEYWORDS	Sensory transduction	10	1.8797	0.999995	OLFR874, OLFR1294, OLFR1383, OLFR954, ADGRV1, OLFR1093, OLFR1441, OLFR207, OLFR804, OLFR1443	483	1320	22680	0.355731	1	1	0.999995
KEGG_PATHWAY	mmu04740:Olfactory transduction	8	1.50376	0.999996	OLFR874, OLFR1294, OLFR1383, OLFR954, GUCY2D, OLFR1093, OLFR1441, OLFR1443	172	1080	7691	0.331223	1	1	1
GOTERM_MF_DIRECT	GO:0004930~G-protein coupled receptor activity	15	2.81955	0.999999	CHRM2, OLFR1294, VIPR1, OLFR1383, ADGRV1, VMN1R46, ADRA1B, OLFR1441, OLFR207, OLFR804, OLFR1443, OLFR874, OLFR954, P2RY1, CMKLR1	381	1749	17446	0.39271	1	1	1
INTERPRO	IPR017452:GPCR, rhodopsin-like, 7TM	14	2.63158	0.999999	CHRM2, OLFR1294, OLFR1383, VMN1R46, OLFR1093, ADRA1B, OLFR1441, OLFR207, OLFR804, OLFR1443, OLFR874, OLFR954, P2RY1, CMKLR1	451	1708	20594	0.374287	1	1	1
Annotation Cluster 78	Enrichment Score: 7.968059121759032E-4
Category	Term	Count	%	PValue	Genes	List Total	Pop Hits	Pop Total	Fold Enrichment	Bonferroni	Benjamini	FDR
UP_KEYWORDS	Immunoglobulin domain	5	0.93985	0.992182	TCRG-V1, PTPRT, SKINT5, IL1RAP, IL11RA1	483	481	22680	0.488114	1	1	0.992182
INTERPRO	IPR003599:Immunoglobulin subtype	4	0.75188	0.999232	TCRG-V1, SKINT5, IL1RAP, IL11RA1	451	518	20594	0.35261	1	1	1
SMART	SM00409:IG	4	0.75188	0.999496	TCRG-V1, SKINT5, IL1RAP, IL11RA1	236	518	10425	0.34111	1	1	1
INTERPRO	IPR007110:Immunoglobulin-like domain	7	1.31579	0.999955	TCRG-V1, PTPRT, H1F0, H2-M3, SKINT5, IL1RAP, IL11RA1	451	920	20594	0.347436	1	1	1
INTERPRO	IPR013783:Immunoglobulin-like fold	8	1.50376	0.999992	TCRG-V1, PTPRT, H1F0, SGCA, H2-M3, SKINT5, IL1RAP, IL11RA1	451	1099	20594	0.332397	1	1	1

## Sheet: 807 genes enrichment analysis
Annotation Cluster 1	Enrichment Score: 2.981603580382705
Category	Term	Count	%	PValue	Genes	List Total	Pop Hits	Pop Total	Fold Enrichment	Bonferroni	Benjamini	FDR
GOTERM_CC_DIRECT	GO:0000139~Golgi membrane	27	3.78151	0.000412005	COPB2, PGAP3, STX16, ARL1, GCC1, PSEN1, PKMYT1, CDC42, CLN3, APOO, GNPTAB, NDST4, CHST15, RAB2A, ABCA5, PTGES2, MMGT1, SEC16A, SURF4, 1190002N15RIK, TAPBP, BC004004, SLC9A8, MAL, CORO7, ACBD3, COPE	614	403	19662	2.14545	0.188213	0.0736373	0.0733463
UP_KEYWORDS	Golgi apparatus	39	5.46218	0.000754	COPB2, SCYL3, PGAP3, STX16, MPL, ARL1, GCC1, PSEN1, PKMYT1, NAGPA, MSLN, APOO, POFUT2, ATP7B, PRRC1, GNPTAB, NDST4, CHST15, ST8SIA4, RAB8A, RAB2A, ABCA5, PTGES2, MMGT1, SYNRG, SURF4, HOOK3, SCAMP1, 1190002N15RIK, YIF1A, SGSM1, GKAP1, BC004004, SLC9A8, MAL, CORO7, ACBD3, B4GALT7, COPE	660	753	22680	1.77979	0.221528	0.0500656	0.0485576
GOTERM_CC_DIRECT	GO:0005794~Golgi apparatus	55	7.70308	0.00365524	SCYL3, PGAP3, USP33, MPL, GCC1, NAGPA, MSLN, SERPINA1B, POFUT2, SERPINA1C, ATP7B, GNPTAB, NAPRT, NDST4, RAB8A, RAB2A, MMGT1, SCAMP1, SLC39A14, 1190002N15RIK, MYH2, MDFIC, SLC9A8, KAT6A, CAT, MAL, B4GALT7, XPR1, COPB2, STX16, ARL1, PSEN1, PKMYT1, CLN3, APOO, PRRC1, CHST15, ST8SIA4, ABCA5, PTGES2, SEC16A, SYNRG, SURF4, HOOK3, YIF1A, SGPP1, SGSM1, GKAP1, BC004004, MPLKIP, CORO7, ACBD3, COPE, ITM2C, …	614	1190	19662	1.48005	0.843224	0.194342	0.193574
Annotation Cluster 2	Enrichment Score: 2.604724097583931
Category	Term	Count	%	PValue	Genes	List Total	Pop Hits	Pop Total	Fold Enrichment	Bonferroni	Benjamini	FDR
UP_KEYWORDS	Protein transport	33	4.62185	0.000400436	COPB2, STX16, VPS26A, PIK3R2, LIN7B, SNX2, SERP1, SNX25, NUP62, S100A13, BBS9, KPNA7, VPS36, AP5S1, GPM6B, RAB8A, RAB2A, MAMDC4, ANKRD27, EXOC8, NUP133, SYNRG, TIMM21, HOOK3, AP5B1, SCAMP1, YIF1A, IFT27, KDELR2, CORO7, SEC24D, PPID, COPE	660	577	22680	1.96534	0.12451	0.0332362	0.0322351
GOTERM_BP_DIRECT	GO:0015031~protein transport	34	4.7619	0.00122002	COPB2, STX16, H2-DMA, VPS26A, PIK3R2, PSEN1, LIN7B, SNX2, SERP1, SNX25, NUP62, S100A13, BBS9, KPNA7, VPS36, AP5S1, GPM6B, RAB8A, RAB2A, MAMDC4, ANKRD27, EXOC8, NUP133, SYNRG, TIMM21, HOOK3, AP5B1, SCAMP1, YIF1A, IFT27, KDELR2, CORO7, PPID, COPE	573	592	18082	1.81238	0.949263	0.993096	0.993096
UP_KEYWORDS	Transport	77	10.7843	0.00276093	SLC35F4, SLC2A1, ORM3, ATP12A, ATP5G1, GM14085, MFSD8, MFSD9, ATP7B, SERP1, AKT2, KHSRP, NUP62, MFSD1, BBS9, KPNA7, ATP6V1E1, VPS36, AP5S1, RAB8A, RAB2A, MAMDC4, KCNH6, EXOC8, NUP133, MMGT1, SPNS3, SLC30A4, TIMM21, AP5B1, SCAMP1, SLC39A14, ASPN, LMBRD1, SLC9A8, NDUFS4, KDELR2, SRSF7, SLC25A4, PPID, SLC47A2, ATP5S, COPB2, SLC26A1, DCTN1, STX16, ATP5A1, SLC41A1, PIK3R2, VPS26A, UQCR10, OAZ1, LIN7B,…	660	1901	22680	1.3919	0.600642	0.130947	0.127003
GOTERM_BP_DIRECT	GO:0006810~transport	73	10.2241	0.0282584	SLC35F4, SLC2A1, ORM3, ATP12A, ATP5G1, MFSD8, MFSD9, ATP7B, SERP1, AKT2, KHSRP, NUP62, MFSD1, BBS9, KPNA7, ATP6V1E1, VPS36, AP5S1, RAB8A, RAB2A, EXOC8, NUP133, MMGT1, SPNS3, SLC30A4, TIMM21, AP5B1, SCAMP1, SLC39A14, LMBRD1, SLC9A8, NDUFS4, KDELR2, SRSF7, SLC25A4, PPID, SLC47A2, ATP5S, COPB2, SLC26A1, DCTN1, STX16, ATP5A1, SLC41A1, PIK3R2, VPS26A, UQCR10, OAZ1, LIN7B, CLN3, SNX2, SNX25, S100A13, C…	573	1822	18082	1.26435	1	1	1
Annotation Cluster 3	Enrichment Score: 2.167407939744576
Category	Term	Count	%	PValue	Genes	List Total	Pop Hits	Pop Total	Fold Enrichment	Bonferroni	Benjamini	FDR
GOTERM_MF_DIRECT	GO:0008270~zinc ion binding	54	7.56303	0.000577423	ZFP729A, USP33, BMI1, PHF6, ZMYM1, ATP7B, CSRP2, ZFP385B, WHSC1L1, ADAMTS6, APOBEC1, USP49, SCAF11, ZFR, SIAH1A, TET2, BAZ1B, PIAS2, ZDHHC14, SYTL3, RNF126, NR5A2, KAT6A, RARA, MMP19, SRSF7, ZFP330, USP13, RNF31, RNF180, GLO1, PXN, RBM4B, CRIP2, ADH5, DPP3, RNFT1, RNF214, UBR5, VPS8, S100A13, CIZ1, ZRANB2, USP20, USP22, CYHR1, MEX3D, MEX3C, AGBL5, ZC3HC1, NR4A3, PHF14, SEC24D, LIMS2	543	1075	17446	1.61392	0.36893	0.300548	0.300548
INTERPRO	IPR013083:Zinc finger, RING/FYVE/PHD-type	25	3.5014	0.00396935	USP13, MTMR3, USP33, RNF180, BMI1, RNFT1, RNF214, PCLO, VPS8, WHSC1L1, RPH3AL, USP49, USP20, SCAF11, USP22, CYHR1, SIAH1A, MEX3D, BAZ1B, MEX3C, SYTL3, RNF126, ZFYVE16, KAT6A, PHF14	615	445	20594	1.88125	0.990769	1	1
UP_KEYWORDS	Zinc	82	11.4846	0.00509926	ZFP729A, ZMYND19, USP33, DGKA, RTCB, BMI1, IKZF2, PHF6, PPP3CB, CSRP2, PCLO, ZFP385B, DHX57, ADNP2, WHSC1L1, APOBEC1, ZFP612, ZGPAT, USP49, SLC30A4, SIAH1A, TET2, FOXP4, BAZ1B, SLC39A14, PIAS2, RNF126, NR5A2, ZFYVE16, KAT6A, RARA, DPEP2, MMP19, SRSF7, ZFP772, ZFP330, USP13, RNF31, MTMR3, ZFP704, RNF180, GLO1, ZFP866, PXN, ASAP3, RBM4B, CRIP2, ZFP60, ADH5, RASGRP3, DPP3, RNFT1, NT5E, RNF214, RNF21…	660	2099	22680	1.34246	0.81682	0.153905	0.149269
UP_KEYWORDS	Metal-binding	122	17.0868	0.00891054	ZFP729A, DGKA, RTCB, CIB3, ATP12A, IKZF2, NUDT4, ALKBH5, GNPTAB, DHX57, ADNP2, PLS3, WHSC1L1, ZFP612, ZGPAT, SIAH1A, FOXP4, PIAS2, CYP2D26, RNF126, ZFYVE16, LOX, KAT6A, MYL2, DPEP2, SRSF7, ISCU, ZFP330, ATP5S, MTMR3, RNF180, GLO1, ZFP866, PXN, ARL1, ZFP60, PKMYT1, ADH5, RASGRP3, DPP3, RNF214, PPP3R1, RNF216, TERT, CYP11A1, VPS8, UBR5, S100A13, SMAD2, NEK9, ZRANB2, DMPK, BCL11B, E330017A01RIK, MEX…	660	3395	22680	1.23486	0.948777	0.19722	0.19128
UP_KEYWORDS	Zinc-finger	60	8.40336	0.0251774	ZFP729A, ZMYND19, USP33, DGKA, BMI1, IKZF2, PHF6, PCLO, ZFP385B, DHX57, ADNP2, WHSC1L1, ZFP612, ZGPAT, USP49, SIAH1A, FOXP4, BAZ1B, PIAS2, RNF126, NR5A2, ZFYVE16, KAT6A, RARA, SRSF7, ZFP772, ZFP330, USP13, RNF31, MTMR3, ZFP704, RNF180, ZFP866, ASAP3, RBM4B, ZFP60, RASGRP3, RNFT1, RNF214, RNF216, POLR2B, UBR5, CHN1, VPS8, CIZ1, RPH3AL, ZRANB2, USP20, BCL11B, USP22, CYHR1, BMX, MEX3D, MEX3C, ZC3HC1…	660	1565	22680	1.31746	0.999789	0.363431	0.352484
GOTERM_MF_DIRECT	GO:0046872~metal ion binding	122	17.0868	0.0377499	ZFP729A, DGKA, RTCB, CIB3, ATP12A, IKZF2, NUDT4, ALKBH5, GNPTAB, DHX57, ADNP2, PLS3, WHSC1L1, ZFP612, ZGPAT, ZBTB37, SIAH1A, FOXP4, PIAS2, CYP2D26, RNF126, ZFYVE16, LOX, KAT6A, MYL2, DPEP2, SRSF7, ISCU, ZFP330, ATP5S, MTMR3, RNF180, GLO1, ZFP866, PXN, ARL1, ZFP60, PKMYT1, ADH5, DPP3, RNF214, PPP3R1, RNF216, TERT, CYP11A1, VPS8, UBR5, S100A13, SMAD2, NEK9, ZFP358, ZRANB2, DMPK, BCL11B, MEX3D, BMX,…	543	3355	17446	1.16832	1	1	1
Annotation Cluster 4	Enrichment Score: 2.059461495927372
Category	Term	Count	%	PValue	Genes	List Total	Pop Hits	Pop Total	Fold Enrichment	Bonferroni	Benjamini	FDR
GOTERM_MF_DIRECT	GO:0044822~poly(A) RNA binding	55	7.70308	0.000754199	RPL31, RTCB, BCCIP, PHF6, ALKBH5, KHSRP, DHX57, PDIA3, 3110082I17RIK, SCAF11, DDX55, ZFR, SAFB, PATL1, UCHL5, RPP25L, PDIA4, FAM133B, SUB1, ALDOA, SRSF6, PPIB, SRSF7, RBMS2, SNRPB, DDX28, CSTB, YTHDC2, ATP5A1, RBM4B, MRM1, MTHFSD, RBM15B, DHX32, POLR2B, PES1, SRP54C, LLPH, CCT4, DYNC1H1, ZRANB2, NOP16, XRCC5, RDX, MEX3D, MEX3C, CLK3, LSM3, LRPPRC, CS, CCT6A, TSR1, EIF3D, EIF4G3, CPEB4	543	1113	17446	1.58768	0.451914	0.300548	0.300548
GOTERM_MF_DIRECT	GO:0003723~RNA binding	35	4.90196	0.0296005	DDX28, PUS10, PRKCSH, PARS2, YTHDC2, RBM4B, MRM1, NUDT4, MTHFSD, RBM15B, TERT, ZFP385B, KHSRP, PES1, UBR5, SNRPB2, DIS3L2, ZRANB2, DDX55, ZFR, SAFB, MEX3D, MEX3C, PATL1, LSM3, LRPPRC, SYNJ1, SRSF6, SRSF7, EIF3D, EIF4G3, RPL37RT, RBMS2, SNRPB, CPEB4	543	780	17446	1.44168	1	1	1
UP_KEYWORDS	RNA-binding	27	3.78151	0.029705	DDX28, YTHDC2, RBM4B, NUDT4, MTHFSD, RBM15B, KHSRP, SNRPB2, DIS3L2, ZRANB2, DDX55, ZFR, SAFB, MEX3D, MEX3C, PATL1, LSM3, LRPPRC, SYNJ1, SRSF6, SRSF7, EIF3D, EIF4G3, RPL37RT, RBMS2, SNRPB, CPEB4	660	601	22680	1.54379	0.999955	0.394483	0.382601
Annotation Cluster 5	Enrichment Score: 2.035779955553201
Category	Term	Count	%	PValue	Genes	List Total	Pop Hits	Pop Total	Fold Enrichment	Bonferroni	Benjamini	FDR
UP_KEYWORDS	Chromosome	24	3.36134	0.00211576	DCTN5, CENPV, HIST1H2AO, NUP133, XRCC5, EED, SS18L1, ZFR, HIST1H1T, LRWD1, ACTR8, PHF6, REC8, STAG2, TERT, NDNL2, PES1, BUB3, LLPH, SPDL1, HIST1H2BA, WHSC1L1, HIST1H2AB, ZFP330	660	409	22680	2.01645	0.50499	0.117072	0.113546
GOTERM_CC_DIRECT	GO:0005694~chromosome	22	3.08123	0.00278185	DCTN5, CENPV, NUP133, XRCC5, EED, SS18L1, ZFR, HIST1H1T, LRWD1, ACTR8, PHF6, REC8, STAG2, TERT, NDNL2, PES1, BUB3, LLPH, SPDL1, HIST1H2BA, WHSC1L1, ZFP330	614	344	19662	2.04797	0.755753	0.194342	0.193574
UP_KEYWORDS	Centromere	11	1.54062	0.00582086	DCTN5, CENPV, STAG2, NUP133, SS18L1, SPDL1, LRWD1, BUB3, PHF6, REC8, ZFP330	660	134	22680	2.8209	0.856033	0.161044	0.156193
GOTERM_CC_DIRECT	GO:0000776~kinetochore	10	1.40056	0.0128554	DCTN5, CENPV, NUP133, DCTN1, SS18L1, SPDL1, LRWD1, PSEN1, BUB3, PHF6	614	120	19662	2.66857	0.998566	0.38714	0.38561
GOTERM_CC_DIRECT	GO:0000775~chromosome, centromeric region	11	1.54062	0.0130067	DCTN5, CENPV, STAG2, NUP133, SS18L1, SPDL1, LRWD1, BUB3, PHF6, REC8, ZFP330	614	141	19662	2.49823	0.998673	0.38714	0.38561
UP_KEYWORDS	Kinetochore	8	1.12045	0.020754	DCTN5, CENPV, NUP133, SS18L1, SPDL1, LRWD1, BUB3, PHF6	660	95	22680	2.89378	0.999054	0.328657	0.318758
GOTERM_CC_DIRECT	GO:0000777~condensed chromosome kinetochore	7	0.980392	0.0472496	DCTN5, CENPV, NUP133, SS18L1, LRWD1, BUB3, PHF6	614	84	19662	2.66857	1	0.85011	0.84675
Annotation Cluster 6	Enrichment Score: 1.9807907439848618
Category	Term	Count	%	PValue	Genes	List Total	Pop Hits	Pop Total	Fold Enrichment	Bonferroni	Benjamini	FDR
GOTERM_CC_DIRECT	GO:0005770~late endosome	12	1.68067	0.00268136	CLN3, ATP7B, ANKRD27, ABCA5, EXOC8, H2-DMA, SLC30A4, SPPL2A, OSBPL1A, VPS36, LAMTOR3, AP5S1	614	131	19662	2.93339	0.742977	0.194342	0.193574
UP_KEYWORDS	Endosome	22	3.08123	0.0199748	ARRDC4, CDKN1B, ANKRD27, ABCA5, MMGT1, H2-DMA, SLC30A4, SPPL2A, VPS26A, SCAMP1, CLN3, ZFYVE16, ATP7B, SNX2, AKT2, SNX25, TLR7, OSBPL1A, VPS36, LAMTOR3, AP5S1, RAB8A	660	443	22680	1.70655	0.998768	0.328657	0.318758
GOTERM_CC_DIRECT	GO:0005768~endosome	27	3.78151	0.0213202	CDKN1B, H2-DMA, SPPL2A, VPS26A, PTPRF, CLN3, SNX2, AKT2, LEPROTL1, SNX25, ATP6V1E1, VPS36, AP5S1, RAB8A, ARRDC4, MAMDC4, ANKRD27, ABCA5, MMGT1, INSR, SLC30A4, SCAMP1, ZFYVE16, TLR7, OSBPL1A, LAMTOR3, NOX1	614	544	19662	1.58937	0.999982	0.513716	0.511685
Annotation Cluster 7	Enrichment Score: 1.8108331972789082
Category	Term	Count	%	PValue	Genes	List Total	Pop Hits	Pop Total	Fold Enrichment	Bonferroni	Benjamini	FDR
GOTERM_CC_DIRECT	GO:0005770~late endosome	12	1.68067	0.00268136	CLN3, ATP7B, ANKRD27, ABCA5, EXOC8, H2-DMA, SLC30A4, SPPL2A, OSBPL1A, VPS36, LAMTOR3, AP5S1	614	131	19662	2.93339	0.742977	0.194342	0.193574
GOTERM_CC_DIRECT	GO:0005765~lysosomal membrane	17	2.38095	0.00286488	RAB2A, HGSNAT, ABCA5, PNPLA7, SPNS3, H2-DMA, SLC30A4, SPPL2A, PSEN1, AP5B1, GNAI1, MFSD8, CLN3, LMBRD1, ATP6V1E1, AP5S1, ITM2C	614	234	19662	2.32644	0.76583	0.194342	0.193574
UP_KEYWORDS	Lysosome	15	2.10084	0.0145546	HGSNAT, ANKRD27, DNASE2A, ABCA5, PNPLA7, FNBP1, H2-DMA, SLC30A4, SPPL2A, MFSD8, CLN3, LMBRD1, TLR7, AP5S1, ITM2C	660	249	22680	2.0701	0.992309	0.284243	0.275682
GOTERM_CC_DIRECT	GO:0005764~lysosome	17	2.38095	0.0563354	HGSNAT, ANKRD27, DNASE2A, ABCA5, PNPLA7, FNBP1, H2-DMA, SLC30A4, SPPL2A, MFSD8, CLN3, LMBRD1, CAT, TLR7, VPS36, AP5S1, ITM2C	614	331	19662	1.64468	1	0.86442	0.861003
GOTERM_CC_DIRECT	GO:0031902~late endosome membrane	6	0.840336	0.140149	ABCA5, H2-DMA, SLC30A4, SPPL2A, VPS36, AP5S1	614	88	19662	2.18337	1	1	0.99802
Annotation Cluster 8	Enrichment Score: 1.690939588963668
Category	Term	Count	%	PValue	Genes	List Total	Pop Hits	Pop Total	Fold Enrichment	Bonferroni	Benjamini	FDR
INTERPRO	IPR011993:Pleckstrin homology-like domain	23	3.22129	0.00575997	ARHGAP9, MTMR3, EXOC8, PLEKHA2, PLEKHG5, RDX, ASAP3, ARAP3, DAPP1, GTF2H1, RASAL2, BMX, PTPN14, MAPK8IP1, TIAM2, EPS8, ARHGAP22, DOK1, AKT2, PLCG2, ELMO2, OSBPL1A, VPS36	615	409	20594	1.88309	0.998892	1	1
INTERPRO	IPR001849:Pleckstrin homology domain	16	2.2409	0.012291	ARHGAP9, EXOC8, PLEKHA2, PLEKHG5, ASAP3, ARAP3, DAPP1, RASAL2, BMX, TIAM2, ARHGAP22, DOK1, AKT2, PLCG2, ELMO2, OSBPL1A	615	262	20594	2.04496	1	1	1
SMART	SM00233:PH	15	2.10084	0.0204126	ARHGAP9, EXOC8, PLEKHA2, PLEKHG5, ASAP3, ARAP3, DAPP1, RASAL2, BMX, TIAM2, ARHGAP22, DOK1, AKT2, PLCG2, OSBPL1A	314	253	10425	1.96842	0.993201	1	1
UP_SEQ_FEATURE	domain:PH	11	1.54062	0.119216	ARHGAP22, DOK1, EXOC8, AKT2, PLEKHG5, ASAP3, PLCG2, ELMO2, DAPP1, OSBPL1A, BMX	565	208	18012	1.68594	1	1	1
Annotation Cluster 9	Enrichment Score: 1.48274969123843
Category	Term	Count	%	PValue	Genes	List Total	Pop Hits	Pop Total	Fold Enrichment	Bonferroni	Benjamini	FDR
KEGG_PATHWAY	mmu01200:Carbon metabolism	11	1.54062	0.00604942	CS, CAT, PHGDH, OGDHL, ALDOC, ALDOA, CSL, FBP1, FH1, ADH5, HK2	263	116	7691	2.77308	0.769708	0.351362	0.344102
GOTERM_BP_DIRECT	GO:0006099~tricarboxylic acid cycle	4	0.560224	0.0626421	CS, OGDHL, CSL, FH1	573	29	18082	4.35265	1	1	1
KEGG_PATHWAY	mmu00020:Citrate cycle (TCA cycle)	4	0.560224	0.0940094	CS, OGDHL, CSL, FH1	263	32	7691	3.65542	1	0.494571	0.484353
Annotation Cluster 10	Enrichment Score: 1.432178633293601
Category	Term	Count	%	PValue	Genes	List Total	Pop Hits	Pop Total	Fold Enrichment	Bonferroni	Benjamini	FDR
GOTERM_CC_DIRECT	GO:0002199~zona pellucida receptor complex	5	0.70028	0.000534353	CCT6A, HSPA1L, CCT8, HSPA1B, CCT4	614	13	19662	12.3165	0.236968	0.0736373	0.0733463
GOTERM_BP_DIRECT	GO:0007339~binding of sperm to zona pellucida	7	0.980392	0.000846859	CCT6A, HSPA1L, HIST1H1T, PRSS37, CCT8, HSPA1B, CCT4	573	36	18082	6.13603	0.873676	0.993096	0.993096
GOTERM_CC_DIRECT	GO:0044297~cell body	10	1.40056	0.00458899	CCT6A, ENTPD2, ACOT7, HSPA1L, GSTO1, USP33, CCT8, HSPA1B, CCT4, MAPK8IP1	614	102	19662	3.13949	0.902448	0.21097	0.210136
GOTERM_BP_DIRECT	GO:1904871~positive regulation of protein localization to Cajal body	3	0.420168	0.0246457	CCT6A, CCT8, CCT4	573	8	18082	11.8338	1	1	1
GOTERM_CC_DIRECT	GO:0005832~chaperonin-containing T-complex	3	0.420168	0.0302092	CCT6A, CCT8, CCT4	614	9	19662	10.6743	1	0.636911	0.634393
GOTERM_BP_DIRECT	GO:1904851~positive regulation of establishment of protein localization to telomere	3	0.420168	0.0310321	CCT6A, CCT8, CCT4	573	9	18082	10.5189	1	1	1
INTERPRO	IPR027410:TCP-1-like chaperonin intermediate domain	3	0.420168	0.0340775	CCT6A, CCT8, CCT4	615	10	20594	10.0459	1	1	1
INTERPRO	IPR002194:Chaperonin TCP-1, conserved site	3	0.420168	0.0340775	CCT6A, CCT8, CCT4	615	10	20594	10.0459	1	1	1
INTERPRO	IPR017998:Chaperone tailless complex polypeptide 1 (TCP-1)	3	0.420168	0.0408417	CCT6A, CCT8, CCT4	615	11	20594	9.13259	1	1	1
GOTERM_BP_DIRECT	GO:0050821~protein stabilization	9	1.2605	0.0505631	CCT6A, USP13, TNIP2, USP33, CCT8, TCF3, PPIB, CCT4, SAV1	573	128	18082	2.21883	1	1	1
INTERPRO	IPR027409:GroEL-like apical domain	3	0.420168	0.0637348	CCT6A, CCT8, CCT4	615	14	20594	7.17561	1	1	1
INTERPRO	IPR027413:GroEL-like equatorial domain	3	0.420168	0.0637348	CCT6A, CCT8, CCT4	615	14	20594	7.17561	1	1	1
INTERPRO	IPR002423:Chaperonin Cpn60/TCP-1	3	0.420168	0.0721276	CCT6A, CCT8, CCT4	615	15	20594	6.69724	1	1	1
GOTERM_BP_DIRECT	GO:1904874~positive regulation of telomerase RNA localization to Cajal body	3	0.420168	0.0799425	CCT6A, CCT8, CCT4	573	15	18082	6.31134	1	1	1
GOTERM_BP_DIRECT	GO:1901998~toxin transport	4	0.560224	0.0979026	CCT6A, COPB2, CCT8, CCT4	573	35	18082	3.60648	1	1	1
UP_KEYWORDS	Chaperone	9	1.2605	0.193213	CCT6A, DNAJC5B, AHSA2, DNAJB14, CCT8, DNAJC28, HSPA1B, PPID, CCT4	660	191	22680	1.61923	1	1	0.97281
GOTERM_MF_DIRECT	GO:0051082~unfolded protein binding	5	0.70028	0.20427	CCT6A, HSPA1L, CCT8, AAMP, CCT4	543	75	17446	2.14193	1	1	1
GOTERM_BP_DIRECT	GO:0006457~protein folding	7	0.980392	0.219582	CCT6A, PDIA3, CCT8, PPIB, PPID, PDIA4, CCT4	573	128	18082	1.72576	1	1	1
GOTERM_BP_DIRECT	GO:0032212~positive regulation of telomere maintenance via telomerase	3	0.420168	0.268793	CCT6A, CCT8, CCT4	573	32	18082	2.95844	1	1	1
Annotation Cluster 11	Enrichment Score: 1.415329614696149
Category	Term	Count	%	PValue	Genes	List Total	Pop Hits	Pop Total	Fold Enrichment	Bonferroni	Benjamini	FDR
INTERPRO	IPR001607:Zinc finger, UBP-type	5	0.70028	0.00082168	USP13, USP49, USP20, USP33, USP22	615	15	20594	11.1621	0.620286	0.967939	0.967939
UP_SEQ_FEATURE	zinc finger region:UBP-type	4	0.560224	0.00417556	USP49, USP20, USP33, USP22	565	11	18012	11.5926	0.998328	1	1
SMART	SM00290:ZnF_UBP	4	0.560224	0.00482078	USP13, USP49, USP20, USP33	314	12	10425	11.0669	0.689462	1	1
INTERPRO	IPR018200:Peptidase C19, ubiquitin carboxyl-terminal hydrolase 2, conserved site	6	0.840336	0.0205112	USP24, USP13, USP49, USP20, USP33, USP22	615	53	20594	3.79089	1	1	1
GOTERM_BP_DIRECT	GO:0006511~ubiquitin-dependent protein catabolic process	11	1.54062	0.0247292	USP24, USP13, USP49, PSMA1, USP20, UBA6, USP33, USP22, SIAH1A, UBE2G1, UCHL5	573	154	18082	2.25405	1	1	1
INTERPRO	IPR001394:Peptidase C19, ubiquitin carboxyl-terminal hydrolase 2	6	0.840336	0.025406	USP24, USP13, USP49, USP20, USP33, USP22	615	56	20594	3.5878	1	1	1
GOTERM_MF_DIRECT	GO:0036459~thiol-dependent ubiquitinyl hydrolase activity	7	0.980392	0.0324353	USP24, USP13, USP49, USP20, USP33, USP22, UCHL5	543	77	17446	2.92081	1	1	1
GOTERM_BP_DIRECT	GO:0016579~protein deubiquitination	7	0.980392	0.0369233	USP24, USP13, USP49, USP20, USP33, USP22, UCHL5	573	78	18082	2.83201	1	1	1
GOTERM_MF_DIRECT	GO:0004843~thiol-dependent ubiquitin-specific protease activity	6	0.840336	0.107374	USP13, USP49, USP20, USP33, USP22, UCHL5	543	81	17446	2.37992	1	1	1
GOTERM_BP_DIRECT	GO:0070536~protein K63-linked deubiquitination	3	0.420168	0.163782	USP13, USP20, USP33	573	23	18082	4.11609	1	1	1
UP_KEYWORDS	Thiol protease	7	0.980392	0.195442	USP24, USP13, USP49, USP20, USP33, USP22, UCHL5	660	134	22680	1.79512	1	1	0.97281
UP_KEYWORDS	Protease	20	2.80112	0.229242	USP24, USP13, USP49, USP20, CMA1, USP33, USP22, SPPL2A, ECEL1, PSEN1, PCSK6, UCHL5, PSMB9, DPP3, AGBL5, PSMA1, FAP, DPEP2, MMP19, ELANE	660	542	22680	1.26803	1	1	0.97281
GOTERM_MF_DIRECT	GO:0008234~cysteine-type peptidase activity	7	0.980392	0.274676	USP24, USP13, USP49, USP20, USP33, USP22, UCHL5	543	141	17446	1.59505	1	1	1
GOTERM_MF_DIRECT	GO:0004197~cysteine-type endopeptidase activity	4	0.560224	0.277393	USP13, USP49, USP20, USP33	543	59	17446	2.17823	1	1	1
Annotation Cluster 12	Enrichment Score: 1.2743909163710305
Category	Term	Count	%	PValue	Genes	List Total	Pop Hits	Pop Total	Fold Enrichment	Bonferroni	Benjamini	FDR
UP_KEYWORDS	Cell division	19	2.66106	0.0249182	NEK9, CENPV, CETN2, ACTR8, GNAI1, AURKA, ZC3HC1, CDC42, STAG2, MAEA, CDC26, KATNA1, SPECC1L, CKS2, CDK20, MPLKIP, BUB3, SPDL1, DIS3L2	660	372	22680	1.75513	0.99977	0.363431	0.352484
UP_KEYWORDS	Cell cycle	28	3.92157	0.0277105	PRR5, CDKN1B, CETN2, BCCIP, PKMYT1, GNAI1, AURKA, CDC42, MAEA, CDC26, KATNA1, CDK20, BUB3, SPDL1, DIS3L2, NEK9, CDKN2B, CENPV, USP22, SIAH1A, TET2, ACTR8, ZC3HC1, STAG2, SPECC1L, TRNP1, CKS2, MPLKIP	660	626	22680	1.53703	0.999911	0.383329	0.371783
GOTERM_BP_DIRECT	GO:0051301~cell division	19	2.66106	0.0515294	NEK9, CENPV, CETN2, ACTR8, GNAI1, AURKA, ZC3HC1, CDC42, STAG2, MAEA, CDC26, KATNA1, SPECC1L, CKS2, CDK20, MPLKIP, BUB3, SPDL1, DIS3L2	573	374	18082	1.60315	1	1	1
UP_KEYWORDS	Mitosis	13	1.82073	0.076715	NEK9, CENPV, CETN2, ACTR8, AURKA, ZC3HC1, STAG2, CDC26, KATNA1, MPLKIP, BUB3, SPDL1, DIS3L2	660	259	22680	1.72482	1	0.776201	0.752822
GOTERM_BP_DIRECT	GO:0007049~cell cycle	27	3.78151	0.0808769	PRR5, CDKN1B, CETN2, BCCIP, PKMYT1, GNAI1, AURKA, MAEA, CDC26, KATNA1, CDK20, BUB3, SPDL1, DIS3L2, NEK9, CDKN2B, CENPV, USP22, SIAH1A, TET2, ACTR8, ZC3HC1, STAG2, SPECC1L, TRNP1, CKS2, MPLKIP	573	614	18082	1.38767	1	1	1
GOTERM_BP_DIRECT	GO:0007067~mitotic nuclear division	14	1.96078	0.102266	NEK9, CENPV, CETN2, ACTR8, AURKA, ZC3HC1, STAG2, CDC26, KATNA1, NUP62, MPLKIP, BUB3, SPDL1, DIS3L2	573	277	18082	1.59492	1	1	1
Annotation Cluster 13	Enrichment Score: 1.1961666728996854
Category	Term	Count	%	PValue	Genes	List Total	Pop Hits	Pop Total	Fold Enrichment	Bonferroni	Benjamini	FDR
KEGG_PATHWAY	mmu04120:Ubiquitin mediated proteolysis	12	1.68067	0.00899469	UBA7, UBA6, SMURF1, CDC26, UBR5, SIAH1A, AA414768, UBE2G1, UBE2J2, UBE2Z, SAE1, PIAS2	263	142	7691	2.47127	0.887698	0.351362	0.344102
UP_SEQ_FEATURE	active site:Glycyl thioester intermediate	6	0.840336	0.114383	UBA6, SMURF1, UBR5, UBE2G1, UBE2J2, UBE2Z	565	82	18012	2.33266	1	1	1
GOTERM_BP_DIRECT	GO:0042787~protein ubiquitination involved in ubiquitin-dependent protein catabolic process	7	0.980392	0.250699	RNF126, MAEA, UBA6, SMURF1, UBR5, SIAH1A, UBE2Z	573	134	18082	1.64849	1	1	1
Annotation Cluster 14	Enrichment Score: 1.1590718150470396
Category	Term	Count	%	PValue	Genes	List Total	Pop Hits	Pop Total	Fold Enrichment	Bonferroni	Benjamini	FDR
GOTERM_CC_DIRECT	GO:0005783~endoplasmic reticulum	55	7.70308	0.0252078	PGAP3, PRKCSH, VPREB3, SERPINA1B, POFUT2, SERPINA1C, ATP7B, SERP1, ARL6IP5, RAB2A, PDIA3, MMGT1, ALG5, DNAJB14, SLC39A14, ZDHHC14, PDIA4, MAPK8IP1, TRDN, TAPBP, CYP2D26, FNDC4, CAT, MZB1, MAL, KDELR2, TLR7, PPIB, RNF180, YTHDC2, LRP5, PSEN1, PKMYT1, UBE2J2, HSPA13, THBS4, CLN3, APOO, PGRMC1, CYB5R3, SC5D, BAK1, PEX16, NUS1, P2RY13, CYB5A, DMPK, PNPLA7, SURF4, ERLIN2, YIF1A, SGPP1, UBAC2, GRINA, C…	614	1323	19662	1.33126	0.999998	0.554572	0.55238
UP_KEYWORDS	Endoplasmic reticulum	38	5.32213	0.0771526	PGAP3, PRKCSH, RNF180, LRP5, PSEN1, PKMYT1, UBE2J2, HSPA13, THBS4, APOO, PGRMC1, POFUT2, SERP1, CYB5R3, ARL6IP5, SC5D, RAB2A, PDIA3, CYB5A, NUS1, DMPK, PNPLA7, MMGT1, SURF4, ALG5, DNAJB14, ERLIN2, YIF1A, SGPP1, PDIA4, UBAC2, MAPK8IP1, TAPBP, CYP2D26, MZB1, KDELR2, TLR7, PPIB	660	997	22680	1.30975	1	0.776201	0.752822
GOTERM_CC_DIRECT	GO:0005789~endoplasmic reticulum membrane	28	3.92157	0.171356	RTCB, PSEN1, PKMYT1, UBE2J2, APOO, PGRMC1, SERP1, CYB5R3, ARL6IP5, SC5D, PEX16, RAB2A, CYB5A, NUS1, DMPK, PNPLA7, SURF4, ALG5, DNAJB14, ERLIN2, YIF1A, SGPP1, UBAC2, MAPK8IP1, TAPBP, CYP2D26, KDELR2, TLR7	614	710	19662	1.26287	1	1	0.99802
Annotation Cluster 15	Enrichment Score: 1.151657433656426
Category	Term	Count	%	PValue	Genes	List Total	Pop Hits	Pop Total	Fold Enrichment	Bonferroni	Benjamini	FDR
KEGG_PATHWAY	mmu01200:Carbon metabolism	11	1.54062	0.00604942	CS, CAT, PHGDH, OGDHL, ALDOC, ALDOA, CSL, FBP1, FH1, ADH5, HK2	263	116	7691	2.77308	0.769708	0.351362	0.344102
KEGG_PATHWAY	mmu01130:Biosynthesis of antibiotics	15	2.10084	0.0144909	OGDHL, ADH5, HK2, FH1, CS, CBS, CAT, SC5D, GALM, PHGDH, ALDOC, ALDOA, FBP1, CSL, BCAT2	263	214	7691	2.04977	0.970767	0.351362	0.344102
KEGG_PATHWAY	mmu01230:Biosynthesis of amino acids	8	1.12045	0.0145191	CS, MAT2A, CBS, PHGDH, ALDOC, ALDOA, CSL, BCAT2	263	76	7691	3.07825	0.970969	0.351362	0.344102
GOTERM_BP_DIRECT	GO:0030388~fructose 1,6-bisphosphate metabolic process	3	0.420168	0.0310321	ALDOC, ALDOA, FBP1	573	9	18082	10.5189	1	1	1
KEGG_PATHWAY	mmu00010:Glycolysis / Gluconeogenesis	6	0.840336	0.0735514	ALDOC, GALM, ALDOA, FBP1, ADH5, HK2	263	66	7691	2.65849	1	0.444986	0.435792
KEGG_PATHWAY	mmu00051:Fructose and mannose metabolism	4	0.560224	0.108052	ALDOC, ALDOA, FBP1, HK2	263	34	7691	3.44039	1	0.533644	0.522618
UP_KEYWORDS	Glycolysis	3	0.420168	0.270549	ALDOC, ALDOA, HK2	660	35	22680	2.94545	1	1	0.97281
KEGG_PATHWAY	mmu00030:Pentose phosphate pathway	3	0.420168	0.27242	ALDOC, ALDOA, FBP1	263	30	7691	2.92433	1	0.834502	0.81726
GOTERM_BP_DIRECT	GO:0006096~glycolytic process	3	0.420168	0.315986	ALDOC, ALDOA, HK2	573	36	18082	2.62973	1	1	1
GOTERM_BP_DIRECT	GO:0051289~protein homotetramerization	4	0.560224	0.416381	CAT, ALDOC, ALDOA, FBP1	573	74	18082	1.70577	1	1	1
Annotation Cluster 16	Enrichment Score: 1.1178618153953035
Category	Term	Count	%	PValue	Genes	List Total	Pop Hits	Pop Total	Fold Enrichment	Bonferroni	Benjamini	FDR
KEGG_PATHWAY	mmu01230:Biosynthesis of amino acids	8	1.12045	0.0145191	CS, MAT2A, CBS, PHGDH, ALDOC, ALDOA, CSL, BCAT2	263	76	7691	3.07825	0.970969	0.351362	0.344102
UP_KEYWORDS	Amino-acid biosynthesis	3	0.420168	0.163513	CBS, PHGDH, BCAT2	660	25	22680	4.12364	1	1	0.97281
GOTERM_BP_DIRECT	GO:0008652~cellular amino acid biosynthetic process	3	0.420168	0.186604	CBS, PHGDH, BCAT2	573	25	18082	3.78681	1	1	1
Annotation Cluster 17	Enrichment Score: 1.0869830762150963
Category	Term	Count	%	PValue	Genes	List Total	Pop Hits	Pop Total	Fold Enrichment	Bonferroni	Benjamini	FDR
UP_KEYWORDS	Mitochondrion	41	5.7423	0.05239	ATP5S, DDX28, ACADVL, MRPS36, PARS2, ATP5A1, UQCR10, GRAMD4, MRM1, ATP5G1, COX5A, FARS2, MRPL33, APOO, CHCHD5, SAMM50, CYB5R3, DHX32, CYP11A1, C1QBP, BAK1, MRPS27, DMPK, PNPLA7, AGK, AGXT2, TIMM21, REXO2, LRPPRC, FH1, MAPK8IP1, HIGD2A, CS, NDUFS4, SLC25A34, SLC27A3, ACBD3, SLC25A4, ISCU, BCAT2, CCDC90B	660	1058	22680	1.33167	1	0.599776	0.58171
UP_KEYWORDS	Transit peptide	22	3.08123	0.0697701	ATP5S, ACADVL, AGK, AGXT2, PARS2, ATP5A1, TIMM21, REXO2, MRM1, ATP5G1, COX5A, LRPPRC, FH1, FARS2, CS, CYP11A1, C1QBP, NDUFS4, AGPS, ISCU, BCAT2, CCDC90B	660	510	22680	1.48235	1	0.747215	0.724709
UP_SEQ_FEATURE	transit peptide:Mitochondrion	21	2.94118	0.150014	ATP5S, ACADVL, AGK, AGXT2, PARS2, ATP5A1, TIMM21, REXO2, MRM1, ATP5G1, COX5A, LRPPRC, FH1, FARS2, CS, CYP11A1, C1QBP, NDUFS4, ISCU, BCAT2, CCDC90B	565	496	18012	1.34974	1	1	1
Annotation Cluster 18	Enrichment Score: 1.0626739928605842
Category	Term	Count	%	PValue	Genes	List Total	Pop Hits	Pop Total	Fold Enrichment	Bonferroni	Benjamini	FDR
INTERPRO	IPR000011:Ubiquitin/SUMO-activating enzyme E1	3	0.420168	0.00835912	UBA7, UBA6, SAE1	615	5	20594	20.0917	0.999949	1	1
INTERPRO	IPR000594:UBA/THIF-type NAD/FAD binding fold	3	0.420168	0.0408417	UBA7, UBA6, SAE1	615	11	20594	9.13259	1	1	1
INTERPRO	IPR016040:NAD(P)-binding domain	8	1.12045	0.382697	UBA7, UBA6, GPD1, PHGDH, DECR2, SAE1, RDH19, ADH5	615	199	20594	1.34618	1	1	1
GOTERM_BP_DIRECT	GO:0006464~cellular protein modification process	3	0.420168	0.429718	UBA7, UBA6, SAE1	573	46	18082	2.05805	1	1	1
Annotation Cluster 19	Enrichment Score: 1.0076892023441275
Category	Term	Count	%	PValue	Genes	List Total	Pop Hits	Pop Total	Fold Enrichment	Bonferroni	Benjamini	FDR
KEGG_PATHWAY	mmu04370:VEGF signaling pathway	9	1.2605	0.000897173	CDC42, PPP3CB, PPP3R1, PIK3CA, AKT2, PXN, PLCG2, PIK3CD, PIK3R2	263	60	7691	4.3865	0.195242	0.137567	0.134725
KEGG_PATHWAY	mmu04662:B cell receptor signaling pathway	9	1.2605	0.00247021	PPP3CB, PPP3R1, PIK3CA, AKT2, PLCG2, PIK3CD, DAPP1, PIK3R2, RASGRP3	263	70	7691	3.75986	0.450381	0.199263	0.195146
KEGG_PATHWAY	mmu05222:Small cell lung cancer	9	1.2605	0.00758789	CDKN2B, CDKN1B, PIK3CA, AKT2, MYC, CKS2, PIK3CD, PIK3R2, LAMC2	263	84	7691	3.13322	0.841701	0.351362	0.344102
KEGG_PATHWAY	mmu04931:Insulin resistance	10	1.40056	0.0124842	PIK3CA, INSR, AKT2, SLC2A1, PRKAG2, PIK3CD, PIK3R2, PYGL, SLC27A3, PTPRF	263	110	7691	2.65849	0.952174	0.351362	0.344102
KEGG_PATHWAY	mmu04923:Regulation of lipolysis in adipocytes	7	0.980392	0.0125033	PIK3CA, INSR, AKT2, PIK3CD, PIK3R2, GNAI1, PNPLA2	263	57	7691	3.59129	0.952397	0.351362	0.344102
KEGG_PATHWAY	mmu04670:Leukocyte transendothelial migration	10	1.40056	0.0190363	CDC42, PIK3CA, MYL2, CLDN24, PXN, PLCG2, PIK3CD, PIK3R2, CTNNA2, GNAI1	263	118	7691	2.47825	0.99045	0.359465	0.352038
KEGG_PATHWAY	mmu04550:Signaling pathways regulating pluripotency of stem cells	11	1.54062	0.0191716	SMAD2, PIK3CA, AKT2, MYC, KAT6A, PIK3CD, INHBB, PIK3R2, TCF3, BMI1, SMAD5	263	138	7691	2.33099	0.990763	0.359465	0.352038
KEGG_PATHWAY	mmu05230:Central carbon metabolism in cancer	7	0.980392	0.0212338	PIK3CA, AKT2, MYC, SLC2A1, PIK3CD, PIK3R2, HK2	263	64	7691	3.19849	0.99445	0.359465	0.352038
KEGG_PATHWAY	mmu05210:Colorectal cancer	7	0.980392	0.0212338	SMAD2, PIK3CA, DCC, AKT2, MYC, PIK3CD, PIK3R2	263	64	7691	3.19849	0.99445	0.359465	0.352038
KEGG_PATHWAY	mmu04066:HIF-1 signaling pathway	9	1.2605	0.0226874	CDKN1B, PIK3CA, INSR, AKT2, PLCG2, SLC2A1, PIK3CD, PIK3R2, HK2	263	102	7691	2.5803	0.996126	0.359465	0.352038
KEGG_PATHWAY	mmu05142:Chagas disease (American trypanosomiasis)	9	1.2605	0.0239005	SMAD2, GNA15, CCL12, PIK3CA, AKT2, PIK3CD, PIK3R2, MYD88, GNAI1	263	103	7691	2.55524	0.997132	0.359465	0.352038
KEGG_PATHWAY	mmu05211:Renal cell carcinoma	7	0.980392	0.0277267	CDC42, PIK3CA, AKT2, SLC2A1, PIK3CD, PIK3R2, FH1	263	68	7691	3.01034	0.998891	0.359465	0.352038
KEGG_PATHWAY	mmu04914:Progesterone-mediated oocyte maturation	8	1.12045	0.0283882	PIK3CA, AKT2, CDC26, PIK3CD, PIK3R2, PKMYT1, GNAI1, CPEB4	263	87	7691	2.68904	0.99906	0.359465	0.352038
KEGG_PATHWAY	mmu04152:AMPK signaling pathway	10	1.40056	0.0303556	RAB2A, PIK3CA, INSR, AKT2, AKT1S1, PRKAG2, PIK3CD, PIK3R2, FBP1, RAB8A	263	128	7691	2.28464	0.999424	0.359465	0.352038
KEGG_PATHWAY	mmu05213:Endometrial cancer	6	0.840336	0.0311932	PIK3CA, AKT2, MYC, PIK3CD, PIK3R2, CTNNA2	263	52	7691	3.37423	0.999533	0.359465	0.352038
KEGG_PATHWAY	mmu04068:FoxO signaling pathway	10	1.40056	0.0390484	SMAD2, CDKN2B, CDKN1B, PIK3CA, INSR, AKT2, CAT, PRKAG2, PIK3CD, PIK3R2	263	134	7691	2.18234	0.999935	0.393602	0.38547
KEGG_PATHWAY	mmu04919:Thyroid hormone signaling pathway	9	1.2605	0.0403603	RCAN1, PIK3CA, AKT2, MYC, PLCG2, SLC2A1, PIK3CD, PIK3R2, MED13L	263	114	7691	2.30869	0.999953	0.393602	0.38547
KEGG_PATHWAY	mmu05221:Acute myeloid leukemia	6	0.840336	0.0411373	PIK3CA, AKT2, MYC, RARA, PIK3CD, PIK3R2	263	56	7691	3.13322	0.999962	0.393602	0.38547
KEGG_PATHWAY	mmu05162:Measles	10	1.40056	0.0422878	DOK1, CDKN1B, PIK3CA, HSPA1L, AKT2, PIK3CD, PIK3R2, TLR7, MYD88, HSPA1B	263	136	7691	2.15025	0.999971	0.393602	0.38547
KEGG_PATHWAY	mmu05169:Epstein-Barr virus infection	10	1.40056	0.0422878	SPN, CDKN1B, PIK3CA, PSMC4, AKT2, MYC, PLCG2, PIK3CD, PIK3R2, MAP3K14	263	136	7691	2.15025	0.999971	0.393602	0.38547
GOTERM_MF_DIRECT	GO:0016303~1-phosphatidylinositol-3-kinase activity	3	0.420168	0.0440095	PIK3CA, PIK3CD, PIK3R2	543	11	17446	8.76243	1	1	1
GOTERM_CC_DIRECT	GO:0005942~phosphatidylinositol 3-kinase complex	3	0.420168	0.0442974	PIK3CA, PIK3CD, PIK3R2	614	11	19662	8.73349	1	0.85011	0.84675
KEGG_PATHWAY	mmu04070:Phosphatidylinositol signaling system	8	1.12045	0.0470617	MTMR3, PIK3CA, IMPA1, SYNJ1, DGKA, PLCG2, PIK3CD, PIK3R2	263	97	7691	2.41182	0.999991	0.397758	0.38954
KEGG_PATHWAY	mmu04910:Insulin signaling pathway	10	1.40056	0.0493	PIK3CA, INSR, AKT2, PRKAG2, PIK3CD, PIK3R2, PYGL, FBP1, PTPRF, HK2	263	140	7691	2.08881	0.999995	0.397758	0.38954
KEGG_PATHWAY	mmu05100:Bacterial invasion of epithelial cells	7	0.980392	0.0493088	CDC42, PIK3CA, PXN, ELMO2, PIK3CD, PIK3R2, CTNNA2	263	78	7691	2.6244	0.999995	0.397758	0.38954
KEGG_PATHWAY	mmu04973:Carbohydrate digestion and absorption	5	0.70028	0.0535714	PIK3CA, AKT2, PIK3CD, PIK3R2, HK2	263	42	7691	3.48135	0.999998	0.418202	0.409562
KEGG_PATHWAY	mmu04660:T cell receptor signaling pathway	8	1.12045	0.056314	CDC42, PPP3CB, PPP3R1, PIK3CA, AKT2, PIK3CD, PIK3R2, MAP3K14	263	101	7691	2.3163	0.999999	0.425874	0.417075
GOTERM_BP_DIRECT	GO:0006006~glucose metabolic process	6	0.840336	0.0638606	SERP1, PIK3CA, AKT2, MYC, GALM, HK2	573	68	18082	2.78442	1	1	1
KEGG_PATHWAY	mmu04380:Osteoclast differentiation	9	1.2605	0.0654476	PPP3CB, PPP3R1, PIK3CA, AKT2, PLCG2, PIK3CD, PIK3R2, MAP3K14, NOX1	263	126	7691	2.08881	1	0.431607	0.422689
KEGG_PATHWAY	mmu04666:Fc gamma R-mediated phagocytosis	7	0.980392	0.0661485	CDC42, PIK3CA, AKT2, ASAP3, PLCG2, PIK3CD, PIK3R2	263	84	7691	2.43695	1	0.431607	0.422689
KEGG_PATHWAY	mmu05145:Toxoplasmosis	8	1.12045	0.066624	HSPA1L, AKT2, H2-DMA, IL10RA, LAMC2, MYD88, GNAI1, HSPA1B	263	105	7691	2.22806	1	0.431607	0.422689
KEGG_PATHWAY	mmu05212:Pancreatic cancer	6	0.840336	0.0698229	SMAD2, CDC42, PIK3CA, AKT2, PIK3CD, PIK3R2	263	65	7691	2.69939	1	0.43326	0.424309
KEGG_PATHWAY	mmu04012:ErbB signaling pathway	7	0.980392	0.0756863	CDKN1B, PIK3CA, AKT2, MYC, PLCG2, PIK3CD, PIK3R2	263	87	7691	2.35291	1	0.446734	0.437504
KEGG_PATHWAY	mmu04932:Non-alcoholic fatty liver disease (NAFLD)	10	1.40056	0.0874256	CDC42, PIK3CA, INSR, AKT2, NDUFS4, PRKAG2, PIK3CD, PIK3R2, UQCR10, COX5A	263	157	7691	1.86263	1	0.48204	0.47208
KEGG_PATHWAY	mmu00562:Inositol phosphate metabolism	6	0.840336	0.089525	MTMR3, PIK3CA, IMPA1, SYNJ1, PLCG2, PIK3CD	263	70	7691	2.50657	1	0.48204	0.47208
KEGG_PATHWAY	mmu04930:Type II diabetes mellitus	5	0.70028	0.0896355	PIK3CA, INSR, PIK3CD, PIK3R2, HK2	263	50	7691	2.92433	1	0.48204	0.47208
KEGG_PATHWAY	mmu05220:Chronic myeloid leukemia	6	0.840336	0.0981343	CDKN1B, PIK3CA, AKT2, MYC, PIK3CD, PIK3R2	263	72	7691	2.43695	1	0.505287	0.494847
BIOCARTA	m_ctcfPathway:CTCF: First Multivalent Nuclear Factor	4	0.560224	0.103778	CDKN1B, PIK3CA, MYC, SMAD5	58	26	1289	3.4191	0.999999	1	1
GOTERM_BP_DIRECT	GO:0048015~phosphatidylinositol-mediated signaling	4	0.560224	0.104419	PIK3CA, SYNJ1, PIK3CD, PIRT	573	36	18082	3.5063	1	1	1
KEGG_PATHWAY	mmu04915:Estrogen signaling pathway	7	0.980392	0.116905	PIK3CA, HSPA1L, AKT2, PIK3CD, PIK3R2, GNAI1, HSPA1B	263	98	7691	2.08881	1	0.565819	0.554129
KEGG_PATHWAY	mmu05223:Non-small cell lung cancer	5	0.70028	0.122615	PIK3CA, AKT2, PLCG2, PIK3CD, PIK3R2	263	56	7691	2.61101	1	0.570632	0.558842
KEGG_PATHWAY	mmu05164:Influenza A	10	1.40056	0.129162	CCL12, PIK3CA, HSPA1L, AKT2, H2-DMA, PIK3CD, PIK3R2, TLR7, MYD88, HSPA1B	263	171	7691	1.71014	1	0.588684	0.576521
KEGG_PATHWAY	mmu04150:mTOR signaling pathway	5	0.70028	0.14079	PIK3CA, AKT2, AKT1S1, PIK3CD, PIK3R2	263	59	7691	2.47825	1	0.608415	0.595844
KEGG_PATHWAY	mmu04210:Apoptosis	5	0.70028	0.147075	PIK3CA, AKT2, PIK3CD, PIK3R2, MAP3K14	263	60	7691	2.43695	1	0.613659	0.60098
KEGG_PATHWAY	mmu04960:Aldosterone-regulated sodium reabsorption	4	0.560224	0.154447	PIK3CA, INSR, PIK3CD, PIK3R2	263	40	7691	2.92433	1	0.633496	0.620407
KEGG_PATHWAY	mmu04510:Focal adhesion	11	1.54062	0.167921	CDC42, PIK3CA, MYL2, AKT2, PXN, ITGA11, PIK3CD, ITGA7, PIK3R2, LAMC2, THBS4	263	207	7691	1.55399	1	0.677282	0.663289
KEGG_PATHWAY	mmu05214:Glioma	5	0.70028	0.18003	PIK3CA, AKT2, PLCG2, PIK3CD, PIK3R2	263	65	7691	2.24949	1	0.689295	0.675054
GOTERM_BP_DIRECT	GO:0046854~phosphatidylinositol phosphorylation	3	0.420168	0.186604	PIK3CA, IMPA1, PIK3CD	573	25	18082	3.78681	1	1	1
KEGG_PATHWAY	mmu04664:Fc epsilon RI signaling pathway	5	0.70028	0.200885	PIK3CA, AKT2, PLCG2, PIK3CD, PIK3R2	263	68	7691	2.15025	1	0.725586	0.710595
GOTERM_BP_DIRECT	GO:0033138~positive regulation of peptidyl-serine phosphorylation	5	0.70028	0.206504	CDC42, SFRP2, PIK3CA, AKT2, AGT	573	74	18082	2.13221	1	1	1
KEGG_PATHWAY	mmu04630:Jak-STAT signaling pathway	8	1.12045	0.22481	PIK3CA, AKT2, IL10RA, MYC, MPL, PIK3CD, PIK3R2, PIAS2	263	145	7691	1.61343	1	0.772517	0.756556
KEGG_PATHWAY	mmu05161:Hepatitis B	8	1.12045	0.22984	CDKN1B, PCNA, PIK3CA, AKT2, MYC, PIK3CD, PIK3R2, MYD88	263	146	7691	1.60238	1	0.772517	0.756556
KEGG_PATHWAY	mmu04722:Neurotrophin signaling pathway	7	0.980392	0.236143	CDC42, PIK3CA, AKT2, PLCG2, PIK3CD, PIK3R2, PSEN1	263	122	7691	1.6779	1	0.782832	0.766658
KEGG_PATHWAY	mmu04071:Sphingolipid signaling pathway	7	0.980392	0.247468	ASAH2, PIK3CA, AKT2, PIK3CD, PIK3R2, GNAI1, SGPP1	263	124	7691	1.65083	1	0.809288	0.792567
KEGG_PATHWAY	mmu04620:Toll-like receptor signaling pathway	6	0.840336	0.260798	PIK3CA, AKT2, PIK3CD, PIK3R2, TLR7, MYD88	263	101	7691	1.73723	1	0.811272	0.79451
KEGG_PATHWAY	mmu05203:Viral carcinogenesis	11	1.54062	0.261484	CDC42, CDKN2B, CDKN1B, PIK3CA, SRF, PXN, PIK3CD, GTF2H1, PIK3R2, BAK1, HIST1H2BA	263	231	7691	1.39254	1	0.811272	0.79451
KEGG_PATHWAY	mmu04650:Natural killer cell mediated cytotoxicity	6	0.840336	0.287107	PPP3CB, PPP3R1, PIK3CA, PLCG2, PIK3CD, PIK3R2	263	105	7691	1.67105	1	0.840371	0.823008
KEGG_PATHWAY	mmu04611:Platelet activation	7	0.980392	0.288226	GUCY1A2, PIK3CA, AKT2, PLCG2, PIK3CD, PIK3R2, GNAI1	263	131	7691	1.56262	1	0.840371	0.823008
KEGG_PATHWAY	mmu04668:TNF signaling pathway	6	0.840336	0.31388	CCL12, PIK3CA, AKT2, PIK3CD, PIK3R2, MAP3K14	263	109	7691	1.60973	1	0.863171	0.845337
GOTERM_BP_DIRECT	GO:0043491~protein kinase B signaling	3	0.420168	0.339346	CCL12, PIK3CA, AKT2	573	38	18082	2.49132	1	1	1
KEGG_PATHWAY	mmu04062:Chemokine signaling pathway	9	1.2605	0.350124	CDC42, CCL12, GM20878, PIK3CA, AKT2, PXN, PIK3CD, PIK3R2, GNAI1	263	196	7691	1.34281	1	0.916456	0.897521
KEGG_PATHWAY	mmu05215:Prostate cancer	5	0.70028	0.352192	CDKN1B, PIK3CA, AKT2, PIK3CD, PIK3R2	263	88	7691	1.66155	1	0.916456	0.897521
KEGG_PATHWAY	mmu05146:Amoebiasis	6	0.840336	0.368223	SERPINB1A, GNA15, PIK3CA, PIK3CD, PIK3R2, LAMC2	263	117	7691	1.49966	1	0.947978	0.928391
KEGG_PATHWAY	mmu04014:Ras signaling pathway	10	1.40056	0.37629	CDC42, PIK3CA, PLA2G1B, INSR, AKT2, PLCG2, PIK3CD, PIK3R2, RASAL2, RASGRP3	263	229	7691	1.277	1	0.95855	0.938746
KEGG_PATHWAY	mmu05205:Proteoglycans in cancer	9	1.2605	0.386369	CDC42, PIK3CA, AKT2, MYC, RDX, PXN, PLCG2, PIK3CD, PIK3R2	263	203	7691	1.2965	1	0.96742	0.947432
KEGG_PATHWAY	mmu05218:Melanoma	4	0.560224	0.437517	PIK3CA, AKT2, PIK3CD, PIK3R2	263	71	7691	1.64751	1	1	0.983402
KEGG_PATHWAY	mmu04810:Regulation of actin cytoskeleton	9	1.2605	0.438368	CDC42, PIK3CA, MYL2, RDX, PXN, ITGA11, PIK3CD, ITGA7, PIK3R2	263	213	7691	1.23563	1	1	0.983402
KEGG_PATHWAY	mmu04015:Rap1 signaling pathway	9	1.2605	0.449575	CDC42, PIK3CA, INSR, AKT2, PIK3CD, ARAP3, PIK3R2, GNAI1, RASGRP3	263	214	7691	1.22986	1	1	0.983402
KEGG_PATHWAY	mmu05231:Choline metabolism in cancer	5	0.70028	0.452757	PIK3CA, DGKA, AKT2, PIK3CD, PIK3R2	263	101	7691	1.44769	1	1	0.983402
KEGG_PATHWAY	mmu04917:Prolactin signaling pathway	4	0.560224	0.455528	PIK3CA, AKT2, PIK3CD, PIK3R2	263	73	7691	1.60238	1	1	0.983402
KEGG_PATHWAY	mmu04725:Cholinergic synapse	5	0.70028	0.540803	PIK3CA, AKT2, PIK3CD, PIK3R2, GNAI1	263	113	7691	1.29395	1	1	0.983402
KEGG_PATHWAY	mmu04512:ECM-receptor interaction	4	0.560224	0.581461	ITGA11, ITGA7, LAMC2, THBS4	263	88	7691	1.32924	1	1	0.983402
KEGG_PATHWAY	mmu04024:cAMP signaling pathway	7	0.980392	0.668019	GLP1R, PIK3CA, AKT2, PIK3CD, ARAP3, PIK3R2, GNAI1	263	197	7691	1.0391	1	1	0.983402
KEGG_PATHWAY	mmu05160:Hepatitis C	5	0.70028	0.68653	PIK3CA, AKT2, CLDN24, PIK3CD, PIK3R2	263	136	7691	1.07512	1	1	0.983402
KEGG_PATHWAY	mmu04151:PI3K-Akt signaling pathway	11	1.54062	0.764447	CDKN1B, PIK3CA, INSR, AKT2, MYC, ITGA11, PIK3CD, ITGA7, PIK3R2, LAMC2, THBS4	263	351	7691	0.916458	1	1	0.983402
KEGG_PATHWAY	mmu04750:Inflammatory mediator regulation of TRP channels	4	0.560224	0.809012	PIK3CA, PLCG2, PIK3CD, PIK3R2	263	126	7691	0.92836	1	1	0.983402
Annotation Cluster 20	Enrichment Score: 0.9662191186961928
Category	Term	Count	%	PValue	Genes	List Total	Pop Hits	Pop Total	Fold Enrichment	Bonferroni	Benjamini	FDR
UP_KEYWORDS	ATP-binding	58	8.12325	0.00369629	MAST3, PARS2, DGKA, RTCB, PIK3CD, PRKAG2, UBE2Z, ATP12A, HK2, FARS2, ATP7B, AKT2, DHX57, CDK20, RIOK1, ENTPD2, DDX55, ACTR8, BAZ1B, MYH2, PIK3CA, ANKK1, CDKL1, DDX28, UBA6, YTHDC2, ATP5A1, WNK4, MST1R, PKMYT1, UBE2J2, HSPA13, AURKA, DHX32, MAT2A, KATNA1, D5ERTD579E, CCT8, ABCF3, CCT4, DYNC1H1, NEK9, ABCA5, DMPK, HSPA1L, AGK, XRCC5, INSR, UBE2G1, PTK6, BMX, HIPK1, CLK3, CCT6A, NMNAT1, PSMC4, MAP3K…	660	1363	22680	1.46228	0.707544	0.136352	0.132245
GOTERM_MF_DIRECT	GO:0005524~ATP binding	66	9.2437	0.00417932	SCYL3, MAST3, PARS2, DGKA, RTCB, PIK3CD, PRKAG2, PYGL, UBE2Z, ATP12A, HK2, FARS2, ATP7B, AKT2, DHX57, CDK20, RIOK1, ENTPD2, DDX55, ACTR8, BAZ1B, MYH2, PIK3CA, ANKK1, CDKL1, DDX28, PXK, UBA6, YTHDC2, ATP5A1, WNK4, MST1R, PKMYT1, UBE2J2, OAS1E, HSPA13, AURKA, DHX32, MAT2A, KATNA1, D5ERTD579E, CCT8, ABCF3, MDN1, CCT4, DYNC1H1, NEK9, ABCA5, DMPK, HSPA1L, AGK, XRCC5, INSR, UBE2G1, PTK6, BMX, HIPK1, CL…	543	1507	17446	1.40711	0.964488	0.666183	0.666183
UP_KEYWORDS	Nucleotide-binding	71	9.94398	0.00421697	HBS1L, MAST3, PARS2, DGKA, RTCB, PIK3CD, PRKAG2, PYGL, UBE2Z, ATP12A, HK2, FARS2, ATP7B, AKT2, DHX57, CDK20, RIOK1, RAB8A, RAB2A, GUCY1A2, ENTPD2, DDX55, ACTR8, BAZ1B, MYH2, PIK3CA, RABL2, SLC27A3, ANKK1, CDKL1, DDX28, UBA6, YTHDC2, ATP5A1, WNK4, ARL1, MST1R, PKMYT1, UBE2J2, HSPA13, GNAI1, AURKA, CDC42, NT5E, GNA15, DHX32, MAT2A, KATNA1, D5ERTD579E, CCT8, ABCF3, CCT4, DYNC1H1, NEK9, ABCA5, DMPK, …	660	1754	22680	1.391	0.75414	0.140003	0.135786
GOTERM_MF_DIRECT	GO:0000166~nucleotide binding	80	11.2045	0.00676604	HBS1L, MAST3, PARS2, DGKA, RTCB, PIK3CD, PRKAG2, PYGL, UBE2Z, ATP12A, HK2, FARS2, ATP7B, AKT2, DHX57, CDK20, RIOK1, RAB8A, RAB2A, GUCY1A2, ENTPD2, DDX55, ACTR8, SAFB, BAZ1B, LEMD3, PIK3CA, RABL2, SRSF6, SLC27A3, ANKK1, SRSF7, RBMS2, CDKL1, DDX28, UBA6, YTHDC2, ATP5A1, WNK4, ARL1, RBM4B, MST1R, PKMYT1, UBE2J2, HSPA13, GNAI1, AURKA, MTHFSD, CDC42, NT5E, RBM15B, GNA15, DHX32, MAT2A, KATNA1, D5ERTD57…	543	1936	17446	1.32764	0.995532	0.898756	0.898756
UP_KEYWORDS	Transferase	62	8.68347	0.0325849	PRKCSH, MAST3, DGKA, PIK3CD, PRKAG2, PYGL, UBE2Z, HK2, POFUT2, PNP, GNPTAB, AKT2, NAPRT, NDST4, CDK20, RIOK1, WHSC1L1, HGSNAT, GSTO1, ALG5, BAZ1B, ZDHHC14, PIK3CA, KAT6A, AGPS, CKS2, ANKK1, B4GALT7, BCAT2, CDKL1, WNK4, MST1R, PKMYT1, UBE2J2, MRM1, AURKA, POLD4, MAT2A, TERT, POLR2B, UBR5, CHST15, ST8SIA4, HAS2, CSL, NUS1, NEK9, CDKN2B, DMPK, SMURF1, AGK, AGXT2, INSR, UBE2G1, PTK6, BMX, HIPK1, CLK3…	660	1654	22680	1.28812	0.999983	0.416084	0.403551
GOTERM_MF_DIRECT	GO:0016740~transferase activity	57	7.98319	0.0643086	MAST3, DGKA, PIK3CD, PYGL, UBE2Z, HK2, POFUT2, PNP, GNPTAB, AKT2, NAPRT, NDST4, CDK20, RIOK1, WHSC1L1, HGSNAT, GSTO1, ALG5, BAZ1B, ZDHHC14, PIK3CA, KAT6A, AGPS, ANKK1, B4GALT7, BCAT2, CDKL1, WNK4, MST1R, PKMYT1, UBE2J2, OAS1E, MRM1, AURKA, POLD4, MAT2A, TERT, POLR2B, UBR5, CHST15, ST8SIA4, HAS2, NUS1, NEK9, DMPK, SMURF1, AGK, AGXT2, INSR, UBE2G1, PTK6, BMX, HIPK1, CLK3, CS, CARM1, MAP3K14	543	1472	17446	1.24412	1	1	1
UP_KEYWORDS	Kinase	28	3.92157	0.0913759	PRKCSH, MAST3, DGKA, WNK4, PRKAG2, PIK3CD, MST1R, PKMYT1, HK2, AURKA, AKT2, CDK20, RIOK1, NEK9, CDKN2B, DMPK, AGK, INSR, PTK6, BMX, HIPK1, BAZ1B, CLK3, PIK3CA, CKS2, ANKK1, MAP3K14, CDKL1	660	707	22680	1.36094	1	0.857258	0.831437
GOTERM_MF_DIRECT	GO:0016301~kinase activity	28	3.92157	0.109397	PRKCSH, MAST3, DGKA, WNK4, PRKAG2, PIK3CD, MST1R, PKMYT1, HK2, AURKA, AKT2, CDK20, RIOK1, NEK9, CDKN2B, DMPK, AGK, INSR, PTK6, BMX, HIPK1, BAZ1B, CLK3, PIK3CA, CKS2, ANKK1, MAP3K14, CDKL1	543	674	17446	1.33473	1	1	1
GOTERM_BP_DIRECT	GO:0006468~protein phosphorylation	24	3.36134	0.155546	SMAD2, SCYL3, NEK9, PXK, DMPK, MAST3, INSR, WNK4, PTK6, MST1R, PKMYT1, BMX, HIPK1, SMAD5, CLK3, AURKA, PPP3CB, PIK3CA, AKT2, RARA, CDK20, ANKK1, MAP3K14, CDKL1	573	576	18082	1.31486	1	1	1
INTERPRO	IPR011009:Protein kinase-like domain	22	3.08123	0.157512	SCYL3, NEK9, PXK, DMPK, MAST3, INSR, WNK4, PIK3CD, PTK6, MST1R, PKMYT1, BMX, HIPK1, CLK3, AURKA, PIK3CA, AKT2, CDK20, RIOK1, ANKK1, MAP3K14, CDKL1	615	556	20594	1.32499	1	1	1
GOTERM_BP_DIRECT	GO:0016310~phosphorylation	24	3.36134	0.228035	NEK9, DMPK, AGK, MAST3, INSR, DGKA, WNK4, PIK3CD, PTK6, MST1R, PKMYT1, BMX, BAZ1B, HIPK1, HK2, CLK3, AURKA, PIK3CA, AKT2, CDK20, RIOK1, ANKK1, MAP3K14, CDKL1	573	612	18082	1.23752	1	1	1
UP_SEQ_FEATURE	domain:Protein kinase	20	2.80112	0.228132	SCYL3, NEK9, PXK, DMPK, MAST3, INSR, WNK4, PTK6, MST1R, PKMYT1, BMX, HIPK1, CLK3, AURKA, AKT2, CDK20, RIOK1, ANKK1, MAP3K14, CDKL1	565	502	18012	1.27011	1	1	1
SMART	SM00220:S_TKc	15	2.10084	0.256686	SCYL3, NEK9, PXK, DMPK, MAST3, WNK4, PKMYT1, HIPK1, CLK3, AURKA, AKT2, CDK20, ANKK1, MAP3K14, CDKL1	314	380	10425	1.31055	1	1	1
INTERPRO	IPR000719:Protein kinase, catalytic domain	19	2.66106	0.272742	SCYL3, NEK9, PXK, DMPK, MAST3, INSR, WNK4, PTK6, MST1R, PKMYT1, BMX, HIPK1, CLK3, AURKA, AKT2, CDK20, ANKK1, MAP3K14, CDKL1	615	515	20594	1.23541	1	1	1
INTERPRO	IPR008271:Serine/threonine-protein kinase, active site	13	1.82073	0.287649	NEK9, DMPK, MAST3, WNK4, PKMYT1, HIPK1, CLK3, AURKA, AKT2, CDK20, ANKK1, MAP3K14, CDKL1	615	333	20594	1.30727	1	1	1
UP_KEYWORDS	Serine/threonine-protein kinase	15	2.10084	0.291699	NEK9, DMPK, MAST3, WNK4, PKMYT1, HIPK1, CLK3, AURKA, PIK3CA, AKT2, CDK20, RIOK1, ANKK1, MAP3K14, CDKL1	660	405	22680	1.27273	1	1	0.97281
GOTERM_MF_DIRECT	GO:0004672~protein kinase activity	20	2.80112	0.293881	SCYL3, NEK9, PXK, DMPK, MAST3, INSR, WNK4, GTF2H1, PTK6, MST1R, PKMYT1, BMX, HIPK1, CLK3, AURKA, AKT2, CDK20, ANKK1, MAP3K14, CDKL1	543	531	17446	1.21013	1	1	1
UP_SEQ_FEATURE	active site:Proton acceptor	25	3.5014	0.382469	ACADVL, MAST3, WNK4, MST1R, PKMYT1, AURKA, AKT2, CDK20, EAR1, RIOK1, NEK9, DMPK, INSR, PTK6, BMX, HIPK1, CLK3, ALDH1A2, GPD1, GALM, ALDOC, ALDOA, ANKK1, MAP3K14, CDKL1	565	710	18012	1.12252	1	1	1
GOTERM_MF_DIRECT	GO:0004674~protein serine/threonine kinase activity	15	2.10084	0.46481	NEK9, DMPK, MAST3, WNK4, PKMYT1, HIPK1, CLK3, AURKA, PIK3CA, AKT2, CDK20, RIOK1, ANKK1, MAP3K14, CDKL1	543	428	17446	1.12601	1	1	1
INTERPRO	IPR017441:Protein kinase, ATP binding site	13	1.82073	0.508899	DMPK, INSR, PTK6, MST1R, PKMYT1, BMX, HIPK1, CLK3, AURKA, AKT2, CDK20, MAP3K14, CDKL1	615	394	20594	1.10487	1	1	1
UP_SEQ_FEATURE	nucleotide phosphate-binding region:ATP	31	4.34174	0.539037	DDX28, UBA6, MAST3, YTHDC2, ATP5A1, WNK4, MST1R, PKMYT1, AURKA, DHX32, MAT2A, AKT2, DHX57, KATNA1, D5ERTD579E, CDK20, DYNC1H1, NEK9, DMPK, DDX55, INSR, PTK6, BMX, HIPK1, CLK3, MYH2, NMNAT1, PSMC4, ANKK1, MAP3K14, CDKL1	565	963	18012	1.02624	1	1	1
UP_SEQ_FEATURE	binding site:ATP	19	2.66106	0.558789	NEK9, DMPK, MAST3, INSR, WNK4, PTK6, MST1R, PKMYT1, BMX, HIPK1, CLK3, AURKA, MAT2A, AKT2, CDK20, RIOK1, ANKK1, MAP3K14, CDKL1	565	583	18012	1.03896	1	1	1
Annotation Cluster 21	Enrichment Score: 0.8689896157396496
Category	Term	Count	%	PValue	Genes	List Total	Pop Hits	Pop Total	Fold Enrichment	Bonferroni	Benjamini	FDR
GOTERM_MF_DIRECT	GO:0005096~GTPase activator activity	13	1.82073	0.0630977	RGS18, PRR5, ARHGAP9, ANKRD27, ASAP3, ARAP3, RASAL2, RASGRP3, TIAM2, ARHGAP22, SGSM1, RIC8B, CHN1	543	235	17446	1.77734	1	1	1
SMART	SM00324:RhoGAP	5	0.70028	0.125534	ARHGAP22, ARHGAP9, CHN1, ARAP3, PIK3R2	314	64	10425	2.5938	1	1	1
INTERPRO	IPR008936:Rho GTPase activation protein	6	0.840336	0.126826	ARHGAP22, ARHGAP9, CHN1, ARAP3, PIK3R2, RASAL2	615	89	20594	2.2575	1	1	1
INTERPRO	IPR000198:Rho GTPase-activating protein domain	5	0.70028	0.133997	ARHGAP22, ARHGAP9, CHN1, ARAP3, PIK3R2	615	66	20594	2.53683	1	1	1
UP_SEQ_FEATURE	domain:Rho-GAP	5	0.70028	0.134706	ARHGAP22, PRR5, CHN1, ARAP3, PIK3R2	565	63	18012	2.53013	1	1	1
UP_KEYWORDS	GTPase activation	7	0.980392	0.336977	ARHGAP22, SGSM1, ARHGAP9, ANKRD27, CHN1, ARAP3, RASAL2	660	163	22680	1.47574	1	1	0.97281
Annotation Cluster 22	Enrichment Score: 0.854876940303676
Category	Term	Count	%	PValue	Genes	List Total	Pop Hits	Pop Total	Fold Enrichment	Bonferroni	Benjamini	FDR
GOTERM_MF_DIRECT	GO:0005518~collagen binding	7	0.980392	0.00978566	CCBE1, ADGRG1, CHADL, ITGA11, NID1, THBS4, ASPN	543	59	17446	3.8119	0.999605	0.974896	0.974896
GOTERM_CC_DIRECT	GO:0005578~proteinaceous extracellular matrix	11	1.54062	0.527646	RTBDN, CCBE1, SMOC2, LOX, CHADL, MMP19, LAMC2, NID1, THBS4, ASPN, ADAMTS6	614	316	19662	1.11472	1	1	0.99802
UP_KEYWORDS	Extracellular matrix	8	1.12045	0.52776	RTBDN, SMOC2, CHADL, MMP19, LAMC2, NID1, THBS4, ASPN	660	235	22680	1.16983	1	1	0.97281
Annotation Cluster 23	Enrichment Score: 0.8260999226564906
Category	Term	Count	%	PValue	Genes	List Total	Pop Hits	Pop Total	Fold Enrichment	Bonferroni	Benjamini	FDR
UP_KEYWORDS	DNA repair	13	1.82073	0.1153	PCNA, XRCC5, CETN2, MUM1, BCCIP, GTF2H1, ACTR8, UCHL5, SFR1, NDNL2, UBR5, NABP2, AP5S1	660	279	22680	1.60117	1	0.920045	0.892333
GOTERM_BP_DIRECT	GO:0006281~DNA repair	15	2.10084	0.133449	PCNA, XRCC5, CETN2, MUM1, BCCIP, GTF2H1, ACTR8, UCHL5, SFR1, NDNL2, UBR5, NABP2, ERCC6, EEF1E1, AP5S1	573	318	18082	1.48852	1	1	1
GOTERM_BP_DIRECT	GO:0006974~cellular response to DNA damage stimulus	18	2.52101	0.178292	PCNA, XRCC5, CETN2, MUM1, BCCIP, GTF2H1, ACTR8, PSEN1, BAZ1B, UCHL5, MLH3, SFR1, NDNL2, MYC, UBR5, NABP2, ERCC6, AP5S1	573	420	18082	1.35243	1	1	1
UP_KEYWORDS	DNA damage	14	1.96078	0.180852	PCNA, XRCC5, CETN2, MUM1, BCCIP, GTF2H1, ACTR8, BAZ1B, UCHL5, SFR1, NDNL2, UBR5, NABP2, AP5S1	660	336	22680	1.43182	1	1	0.97281
Annotation Cluster 24	Enrichment Score: 0.8181499353940719
Category	Term	Count	%	PValue	Genes	List Total	Pop Hits	Pop Total	Fold Enrichment	Bonferroni	Benjamini	FDR
GOTERM_CC_DIRECT	GO:0005790~smooth endoplasmic reticulum	4	0.560224	0.0605004	PDIA3, PSEN1, PPIB, PDIA4	614	29	19662	4.41694	1	0.86442	0.861003
UP_KEYWORDS	Isomerase	8	1.12045	0.065403	PDIA3, PUS10, PTGES2, GALM, FUOM, PPIB, PPID, PDIA4	660	122	22680	2.25335	1	0.723793	0.701992
GOTERM_MF_DIRECT	GO:0016853~isomerase activity	8	1.12045	0.0672901	PDIA3, PUS10, PTGES2, GALM, FUOM, PPIB, PPID, PDIA4	543	115	17446	2.23505	1	1	1
GOTERM_CC_DIRECT	GO:0042470~melanosome	7	0.980392	0.0958717	PDIA3, RAB2A, ANKRD27, SLC2A1, PPIB, PDIA4, CCT4	614	101	19662	2.2194	1	1	0.99802
GOTERM_BP_DIRECT	GO:0006457~protein folding	7	0.980392	0.219582	CCT6A, PDIA3, CCT8, PPIB, PPID, PDIA4, CCT4	573	128	18082	1.72576	1	1	1
GOTERM_BP_DIRECT	GO:0061077~chaperone-mediated protein folding	3	0.420168	0.268793	PPIB, PPID, PDIA4	573	32	18082	2.95844	1	1	1
UP_SEQ_FEATURE	short sequence motif:Prevents secretion from ER	4	0.560224	0.298526	PDIA3, PRKCSH, PPIB, PDIA4	565	61	18012	2.09047	1	1	1
GOTERM_CC_DIRECT	GO:0005788~endoplasmic reticulum lumen	4	0.560224	0.633586	PDIA3, MZB1, PPIB, PDIA4	614	104	19662	1.23165	1	1	0.99802
Annotation Cluster 25	Enrichment Score: 0.8019779565956479
Category	Term	Count	%	PValue	Genes	List Total	Pop Hits	Pop Total	Fold Enrichment	Bonferroni	Benjamini	FDR
GOTERM_MF_DIRECT	GO:0004540~ribonuclease activity	4	0.560224	0.1067	RNASE9, RNASE10, EAR1, DIS3L2	543	37	17446	3.4734	1	1	1
INTERPRO	IPR023412:Ribonuclease A-domain	3	0.420168	0.191845	RNASE9, RNASE10, EAR1	615	27	20594	3.72069	1	1	1
INTERPRO	IPR001427:Ribonuclease A	3	0.420168	0.191845	RNASE9, RNASE10, EAR1	615	27	20594	3.72069	1	1	1
Annotation Cluster 26	Enrichment Score: 0.7636682148982633
Category	Term	Count	%	PValue	Genes	List Total	Pop Hits	Pop Total	Fold Enrichment	Bonferroni	Benjamini	FDR
INTERPRO	IPR020472:G-protein beta WD-40 repeat	7	0.980392	0.0545773	COPB2, WDR47, WDR1, WDR61, WDR83, CORO7, BUB3	615	91	20594	2.57586	1	1	1
INTERPRO	IPR015943:WD40/YVTN repeat-like-containing domain	16	2.2409	0.0846316	COPB2, SEMA7A, WDR47, NUP133, WDR1, EED, WDR61, WDR83, MST1R, LRWD1, EML6, VPS8, CORO7, BUB3, CFAP43, AAMP	615	340	20594	1.57582	1	1	1
INTERPRO	IPR001680:WD40 repeat	13	1.82073	0.0949188	COPB2, WDR47, WDR1, EED, WDR61, WDR83, LRWD1, EML6, VPS8, CORO7, BUB3, CFAP43, AAMP	615	263	20594	1.65521	1	1	1
UP_SEQ_FEATURE	repeat:WD 7	8	1.12045	0.104185	COPB2, WDR47, EML6, WDR1, EED, WDR61, WDR83, CORO7	565	127	18012	2.00817	1	1	1
INTERPRO	IPR019775:WD40 repeat, conserved site	9	1.2605	0.109308	WDR47, EML6, WDR1, EED, WDR61, WDR83, CORO7, LRWD1, AAMP	615	161	20594	1.8719	1	1	1
UP_KEYWORDS	WD repeat	12	1.68067	0.127476	COPB2, WDR47, EML6, WDR1, EED, VPS8, WDR61, WDR83, CORO7, LRWD1, BUB3, AAMP	660	256	22680	1.6108	1	0.920045	0.892333
INTERPRO	IPR024977:Anaphase-promoting complex subunit 4, WD40 domain	3	0.420168	0.128551	WDR47, EML6, WDR61	615	21	20594	4.78374	1	1	1
INTERPRO	IPR011047:Quinonprotein alcohol dehydrogenase-like superfamily	4	0.560224	0.142989	EML6, WDR61, CORO7, AAMP	615	44	20594	3.0442	1	1	1
SMART	SM00320:WD40	12	1.68067	0.165249	COPB2, WDR47, EML6, WDR1, EED, WDR61, WDR83, CORO7, LRWD1, BUB3, CFAP43, AAMP	314	262	10425	1.52064	1	1	1
UP_SEQ_FEATURE	repeat:WD 8	4	0.560224	0.181764	COPB2, EML6, WDR1, CORO7	565	47	18012	2.71316	1	1	1
INTERPRO	IPR017986:WD40-repeat-containing domain	13	1.82073	0.204891	COPB2, WDR47, WDR1, EED, WDR61, WDR83, LRWD1, EML6, VPS8, CORO7, BUB3, CFAP43, AAMP	615	307	20594	1.41798	1	1	1
UP_SEQ_FEATURE	repeat:WD 5	10	1.40056	0.219162	COPB2, WDR47, EML6, WDR1, EED, WDR61, WDR83, CORO7, LRWD1, BUB3	565	211	18012	1.51088	1	1	1
UP_SEQ_FEATURE	repeat:WD 6	8	1.12045	0.269565	COPB2, WDR47, EML6, WDR1, EED, WDR61, WDR83, CORO7	565	167	18012	1.52717	1	1	1
UP_SEQ_FEATURE	repeat:WD 9	3	0.420168	0.288362	COPB2, EML6, WDR1	565	34	18012	2.81291	1	1	1
UP_SEQ_FEATURE	repeat:WD 4	10	1.40056	0.29567	COPB2, WDR47, EML6, WDR1, EED, WDR61, WDR83, CORO7, LRWD1, BUB3	565	230	18012	1.38607	1	1	1
UP_SEQ_FEATURE	repeat:WD 3	10	1.40056	0.352416	COPB2, WDR47, EML6, WDR1, EED, WDR61, WDR83, CORO7, LRWD1, BUB3	565	243	18012	1.31192	1	1	1
UP_SEQ_FEATURE	repeat:WD 1	10	1.40056	0.374719	COPB2, WDR47, EML6, WDR1, EED, WDR61, WDR83, CORO7, LRWD1, BUB3	565	248	18012	1.28547	1	1	1
UP_SEQ_FEATURE	repeat:WD 2	10	1.40056	0.374719	COPB2, WDR47, EML6, WDR1, EED, WDR61, WDR83, CORO7, LRWD1, BUB3	565	248	18012	1.28547	1	1	1
Annotation Cluster 27	Enrichment Score: 0.7623851319249555
Category	Term	Count	%	PValue	Genes	List Total	Pop Hits	Pop Total	Fold Enrichment	Bonferroni	Benjamini	FDR
INTERPRO	IPR011011:Zinc finger, FYVE/PHD-type	9	1.2605	0.0511171	RPH3AL, ZFYVE16, PCLO, MTMR3, KAT6A, PHF14, BAZ1B, WHSC1L1, SYTL3	615	136	20594	2.216	1	1	1
INTERPRO	IPR017455:Zinc finger, FYVE-related	3	0.420168	0.29159	RPH3AL, ZFYVE16, MTMR3	615	36	20594	2.79051	1	1	1
UP_SEQ_FEATURE	zinc finger region:FYVE-type	3	0.420168	0.346343	RPH3AL, ZFYVE16, MTMR3	565	39	18012	2.45228	1	1	1
Annotation Cluster 28	Enrichment Score: 0.7386151864938862
Category	Term	Count	%	PValue	Genes	List Total	Pop Hits	Pop Total	Fold Enrichment	Bonferroni	Benjamini	FDR
UP_KEYWORDS	GPI-anchor	8	1.12045	0.114133	CD52, NT5E, SEMA7A, DPEP2, MMP19, HFE2, MSLN, CD55	660	140	22680	1.96364	1	0.920045	0.892333
GOTERM_CC_DIRECT	GO:0031225~anchored component of membrane	8	1.12045	0.151959	CD52, NT5E, SEMA7A, DPEP2, MMP19, HFE2, MSLN, CD55	614	141	19662	1.8169	1	1	0.99802
UP_SEQ_FEATURE	propeptide:Removed in mature form	11	1.54062	0.214496	CDC42, CD52, NT5E, SEMA7A, DPEP2, MMP19, HFE2, MSLN, CD55, RAB8A, PSMB9	565	238	18012	1.47343	1	1	1
UP_SEQ_FEATURE	lipid moiety-binding region:GPI-anchor amidated serine	4	0.560224	0.298526	CD52, NT5E, DPEP2, MSLN	565	61	18012	2.09047	1	1	1
Annotation Cluster 29	Enrichment Score: 0.7376931111373576
Category	Term	Count	%	PValue	Genes	List Total	Pop Hits	Pop Total	Fold Enrichment	Bonferroni	Benjamini	FDR
GOTERM_BP_DIRECT	GO:0015992~proton transport	6	0.840336	0.0361067	ATP5S, ATP5A1, ATP12A, ATP6V1E1, ATP5G1, NOX1	573	58	18082	3.26449	1	1	1
UP_KEYWORDS	Hydrogen ion transport	5	0.70028	0.0411691	ATP5S, ATP5A1, ATP12A, ATP6V1E1, ATP5G1	660	45	22680	3.81818	0.999999	0.506227	0.49098
GOTERM_BP_DIRECT	GO:0015991~ATP hydrolysis coupled proton transport	4	0.560224	0.0853926	ATP5A1, ATP12A, ATP6V1E1, ATP5G1	573	33	18082	3.82506	1	1	1
KEGG_PATHWAY	mmu00190:Oxidative phosphorylation	7	0.980392	0.336363	NDUFS4, ATP5A1, UQCR10, ATP12A, ATP6V1E1, COX5A, ATP5G1	263	139	7691	1.47269	1	0.894503	0.876022
UP_KEYWORDS	Ion transport	14	1.96078	0.914035	ATP5S, SLC26A1, KCNH6, SLC30A4, ATP5A1, SLC41A1, ATP12A, ATP5G1, SLC39A14, ASPN, ATP7B, SLC9A8, ATP6V1E1, CACNG2	660	619	22680	0.777207	1	1	0.97281
GOTERM_BP_DIRECT	GO:0006811~ion transport	13	1.82073	0.960485	ATP5S, SLC26A1, SLC30A4, ATP5A1, WNK4, SLC41A1, ATP12A, ATP5G1, SLC39A14, ATP7B, SLC9A8, ATP6V1E1, CACNG2	573	584	18082	0.702461	1	1	1
Annotation Cluster 30	Enrichment Score: 0.7328361430302162
Category	Term	Count	%	PValue	Genes	List Total	Pop Hits	Pop Total	Fold Enrichment	Bonferroni	Benjamini	FDR
INTERPRO	IPR015940:Ubiquitin-associated/translation elongation factor EF1B, N-terminal, eukaryote	5	0.70028	0.061402	USP24, RNF31, USP13, DHX57, UBAC2	615	50	20594	3.34862	1	1	1
INTERPRO	IPR009060:UBA-like	4	0.560224	0.249282	USP24, USP13, DHX57, UBAC2	615	58	20594	2.30939	1	1	1
SMART	SM00165:UBA	3	0.420168	0.271982	USP13, DHX57, UBAC2	314	34	10425	2.92947	1	1	1
UP_SEQ_FEATURE	domain:UBA	4	0.560224	0.281347	USP24, RNF31, DHX57, UBAC2	565	59	18012	2.16133	1	1	1
Annotation Cluster 31	Enrichment Score: 0.7215967725670999
Category	Term	Count	%	PValue	Genes	List Total	Pop Hits	Pop Total	Fold Enrichment	Bonferroni	Benjamini	FDR
INTERPRO	IPR011011:Zinc finger, FYVE/PHD-type	9	1.2605	0.0511171	RPH3AL, ZFYVE16, PCLO, MTMR3, KAT6A, PHF14, BAZ1B, WHSC1L1, SYTL3	615	136	20594	2.216	1	1	1
INTERPRO	IPR001965:Zinc finger, PHD-type	6	0.840336	0.135669	ZFP729A, KAT6A, PHF14, BAZ1B, PHF6, WHSC1L1	615	91	20594	2.20788	1	1	1
SMART	SM00249:PHD	6	0.840336	0.138108	ZFP729A, KAT6A, PHF14, BAZ1B, PHF6, WHSC1L1	314	91	10425	2.18905	1	1	1
UP_SEQ_FEATURE	zinc finger region:PHD-type 2	3	0.420168	0.183695	KAT6A, PHF14, WHSC1L1	565	25	18012	3.82556	1	1	1
UP_SEQ_FEATURE	zinc finger region:PHD-type 1	3	0.420168	0.218221	KAT6A, PHF14, WHSC1L1	565	28	18012	3.41568	1	1	1
INTERPRO	IPR019787:Zinc finger, PHD-finger	4	0.560224	0.404137	KAT6A, PHF14, BAZ1B, WHSC1L1	615	77	20594	1.73954	1	1	1
INTERPRO	IPR019786:Zinc finger, PHD-type, conserved site	3	0.420168	0.572841	PHF14, BAZ1B, WHSC1L1	615	64	20594	1.56966	1	1	1
Annotation Cluster 32	Enrichment Score: 0.6994036651884987
Category	Term	Count	%	PValue	Genes	List Total	Pop Hits	Pop Total	Fold Enrichment	Bonferroni	Benjamini	FDR
KEGG_PATHWAY	mmu05410:Hypertrophic cardiomyopathy (HCM)	6	0.840336	0.131359	SGCB, MYL2, ITGA11, PRKAG2, ITGA7, CACNG2	263	79	7691	2.22101	1	0.588684	0.576521
KEGG_PATHWAY	mmu05412:Arrhythmogenic right ventricular cardiomyopathy (ARVC)	5	0.70028	0.193853	SGCB, ITGA11, ITGA7, CTNNA2, CACNG2	263	67	7691	2.18234	1	0.721728	0.706817
KEGG_PATHWAY	mmu05414:Dilated cardiomyopathy	5	0.70028	0.313225	SGCB, MYL2, ITGA11, ITGA7, CACNG2	263	83	7691	1.76165	1	0.863171	0.845337
Annotation Cluster 33	Enrichment Score: 0.6832358956156627
Category	Term	Count	%	PValue	Genes	List Total	Pop Hits	Pop Total	Fold Enrichment	Bonferroni	Benjamini	FDR
INTERPRO	IPR018247:EF-Hand 1, calcium-binding site	11	1.54062	0.037325	SMOC2, PPP3R1, RCVRN, GNPTAB, PRKCSH, MYL2, CETN2, DGKA, CIB3, PLS3, RASGRP3	615	175	20594	2.10485	1	1	1
INTERPRO	IPR011992:EF-hand-like domain	13	1.82073	0.115408	RCVRN, PRKCSH, CETN2, SYNRG, DGKA, CIB3, RASGRP3, SMOC2, PPP3R1, MYL2, S100A13, PLCG2, PLS3	615	273	20594	1.59458	1	1	1
INTERPRO	IPR002048:EF-hand domain	11	1.54062	0.129617	SMOC2, PPP3R1, RCVRN, GNPTAB, PRKCSH, MYL2, CETN2, DGKA, CIB3, PLS3, RASGRP3	615	223	20594	1.65178	1	1	1
UP_SEQ_FEATURE	domain:EF-hand 1	9	1.2605	0.180213	SMOC2, PPP3R1, RCVRN, PRKCSH, MYL2, CETN2, DGKA, S100A13, PLS3	565	174	18012	1.64895	1	1	1
GOTERM_MF_DIRECT	GO:0005509~calcium ion binding	27	3.78151	0.195088	PRKCSH, PLA2G1B, CETN2, DGKA, PROS1, PCDH11X, CIB3, NID1, THBS4, RASGRP3, PPP3CB, PPP3R1, PCLO, GNPTAB, S100A13, PLS3, JAG2, CCBE1, RCVRN, RPH3AL, ASPN, SYTL3, SMOC2, C2CD4D, MYL2, FAT1, MMP19	543	699	17446	1.24103	1	1	1
UP_SEQ_FEATURE	calcium-binding region:1	7	0.980392	0.203179	SMOC2, PPP3R1, PRKCSH, CETN2, DGKA, S100A13, PLS3	565	126	18012	1.77109	1	1	1
UP_KEYWORDS	Calcium	29	4.06162	0.226608	PRKCSH, PLA2G1B, CETN2, DGKA, AVIL, PROS1, PCDH11X, CIB3, NID1, THBS4, PPP3R1, PCLO, GNPTAB, PLCG2, S100A13, PLS3, CACNG2, JAG2, CCBE1, RCVRN, ENTPD2, SS18L1, ASPN, SMOC2, MYL2, ITGA11, FAT1, ITGA7, MMP19	660	827	22680	1.20501	1	1	0.97281
SMART	SM00054:EFh	7	0.980392	0.269777	PPP3R1, RCVRN, MYL2, CETN2, DGKA, PLS3, RASGRP3	314	145	10425	1.60279	1	1	1
UP_SEQ_FEATURE	calcium-binding region:2	6	0.840336	0.286145	SMOC2, PPP3R1, CETN2, DGKA, S100A13, PLS3	565	114	18012	1.67788	1	1	1
UP_SEQ_FEATURE	domain:EF-hand 2	8	1.12045	0.299043	SMOC2, PPP3R1, RCVRN, PRKCSH, MYL2, CETN2, DGKA, PLS3	565	173	18012	1.4742	1	1	1
UP_SEQ_FEATURE	domain:EF-hand 3	4	0.560224	0.545918	PPP3R1, RCVRN, MYL2, CETN2	565	91	18012	1.4013	1	1	1
UP_SEQ_FEATURE	domain:EF-hand 4	3	0.420168	0.555451	PPP3R1, RCVRN, CETN2	565	59	18012	1.621	1	1	1
Annotation Cluster 34	Enrichment Score: 0.6424970737624699
Category	Term	Count	%	PValue	Genes	List Total	Pop Hits	Pop Total	Fold Enrichment	Bonferroni	Benjamini	FDR
INTERPRO	IPR000008:C2 calcium-dependent membrane targeting	9	1.2605	0.0955684	PCLO, PIK3CA, C2CD4D, SMURF1, PLCG2, PIK3CD, RASAL2, CC2D1A, SYTL3	615	156	20594	1.93189	1	1	1
SMART	SM00239:C2	7	0.980392	0.173629	PCLO, C2CD4D, SMURF1, PLCG2, RASAL2, CC2D1A, SYTL3	314	125	10425	1.85924	1	1	1
UP_SEQ_FEATURE	domain:C2	4	0.560224	0.375996	PIK3CA, SMURF1, PLCG2, CC2D1A	565	70	18012	1.82169	1	1	1
GOTERM_MF_DIRECT	GO:0005544~calcium-dependent phospholipid binding	3	0.420168	0.431411	PCLO, C2CD4D, SYTL3	543	47	17446	2.05078	1	1	1
Annotation Cluster 35	Enrichment Score: 0.6203331206553157
Category	Term	Count	%	PValue	Genes	List Total	Pop Hits	Pop Total	Fold Enrichment	Bonferroni	Benjamini	FDR
UP_SEQ_FEATURE	domain:KH 1	3	0.420168	0.139206	KHSRP, MEX3D, MEX3C	565	21	18012	4.55424	1	1	1
UP_SEQ_FEATURE	domain:KH 2	3	0.420168	0.139206	KHSRP, MEX3D, MEX3C	565	21	18012	4.55424	1	1	1
INTERPRO	IPR004087:K Homology domain	3	0.420168	0.313767	KHSRP, MEX3D, MEX3C	615	38	20594	2.64365	1	1	1
SMART	SM00322:KH	3	0.420168	0.316758	KHSRP, MEX3D, MEX3C	314	38	10425	2.6211	1	1	1
INTERPRO	IPR004088:K Homology domain, type 1	3	0.420168	0.410849	KHSRP, MEX3D, MEX3C	615	47	20594	2.13742	1	1	1
Annotation Cluster 36	Enrichment Score: 0.6118573289489214
Category	Term	Count	%	PValue	Genes	List Total	Pop Hits	Pop Total	Fold Enrichment	Bonferroni	Benjamini	FDR
GOTERM_BP_DIRECT	GO:0006413~translational initiation	5	0.70028	0.0909736	EIF2B4, YAE1D1, EIF3M, EIF3D, EIF4G3	573	54	18082	2.92192	1	1	1
UP_KEYWORDS	Protein biosynthesis	8	1.12045	0.137114	EIF2B4, HBS1L, EIF3M, PARS2, EEF1E1, EIF3D, EIF4G3, FARS2	660	147	22680	1.87013	1	0.92902	0.901037
UP_KEYWORDS	Initiation factor	4	0.560224	0.284741	EIF2B4, EIF3M, EIF3D, EIF4G3	660	64	22680	2.14773	1	1	0.97281
GOTERM_MF_DIRECT	GO:0003743~translation initiation factor activity	4	0.560224	0.354269	EIF2B4, EIF3M, EIF3D, EIF4G3	543	68	17446	1.88994	1	1	1
KEGG_PATHWAY	mmu03013:RNA transport	6	0.840336	0.693317	EIF2B4, NUP133, NUP62, EIF3D, EIF4G3, RPP25L	263	170	7691	1.03212	1	1	0.983402
Annotation Cluster 37	Enrichment Score: 0.6116431768982487
Category	Term	Count	%	PValue	Genes	List Total	Pop Hits	Pop Total	Fold Enrichment	Bonferroni	Benjamini	FDR
GOTERM_BP_DIRECT	GO:0008380~RNA splicing	13	1.82073	0.0813389	ZRANB2, USP49, SCAF11, RBM4B, WDR83, LSM3, RBM15B, KHSRP, C1QBP, SNRPB2, SRSF6, SRSF7, SNRPB	573	241	18082	1.70223	1	1	1
UP_KEYWORDS	mRNA splicing	12	1.68067	0.092683	RBM15B, ZRANB2, USP49, KHSRP, C1QBP, RBM4B, WDR83, SNRPB2, SRSF6, SRSF7, LSM3, SNRPB	660	240	22680	1.71818	1	0.857258	0.831437
GOTERM_BP_DIRECT	GO:0000398~mRNA splicing, via spliceosome	7	0.980392	0.144313	RBM15B, USP49, DHX32, WDR83, SNRPB2, LSM3, SNRPB	573	112	18082	1.97229	1	1	1
UP_KEYWORDS	mRNA processing	13	1.82073	0.18331	APOBEC1, ZRANB2, USP49, RBM4B, WDR83, LSM3, RBM15B, KHSRP, C1QBP, SNRPB2, SRSF6, SRSF7, SNRPB	660	307	22680	1.45514	1	1	0.97281
GOTERM_BP_DIRECT	GO:0006397~mRNA processing	14	1.96078	0.22011	APOBEC1, ZRANB2, USP49, RBM4B, WDR83, LSM3, ALKBH5, RBM15B, KHSRP, C1QBP, SNRPB2, SRSF6, SRSF7, SNRPB	573	322	18082	1.37203	1	1	1
KEGG_PATHWAY	mmu03040:Spliceosome	7	0.980392	0.300135	HSPA1L, SNRPB2, SRSF6, SRSF7, HSPA1B, LSM3, SNRPB	263	133	7691	1.53912	1	0.863171	0.845337
GOTERM_CC_DIRECT	GO:0071013~catalytic step 2 spliceosome	4	0.560224	0.579307	WDR83, SNRPB2, LSM3, SNRPB	614	96	19662	1.33428	1	1	0.99802
GOTERM_CC_DIRECT	GO:0005681~spliceosomal complex	5	0.70028	0.61635	DHX32, WDR83, SNRPB2, LSM3, SNRPB	614	136	19662	1.17731	1	1	0.99802
UP_KEYWORDS	Spliceosome	4	0.560224	0.664857	WDR83, SNRPB2, LSM3, SNRPB	660	117	22680	1.17483	1	1	0.97281
Annotation Cluster 38	Enrichment Score: 0.6113902005400667
Category	Term	Count	%	PValue	Genes	List Total	Pop Hits	Pop Total	Fold Enrichment	Bonferroni	Benjamini	FDR
GOTERM_MF_DIRECT	GO:0004866~endopeptidase inhibitor activity	5	0.70028	0.0149097	CSTB, SERPINA1B, SERPINA1C, AHSG, UCHL5	543	31	17446	5.18208	0.999994	1	1
UP_KEYWORDS	Protease inhibitor	7	0.980392	0.141011	CSTB, SERPINA1B, SERPINB1A, SERPINA1C, SPINT1, WFDC18, STFA3	660	121	22680	1.98798	1	0.93631	0.908108
UP_SEQ_FEATURE	site:Reactive bond	4	0.560224	0.23054	SERPINA1B, SERPINB1A, SERPINA1C, SPINT1	565	53	18012	2.40601	1	1	1
GOTERM_BP_DIRECT	GO:0010466~negative regulation of peptidase activity	6	0.840336	0.311836	CSTB, SERPINA1B, SERPINB1A, SERPINA1C, SPINT1, WFDC18	573	117	18082	1.61829	1	1	1
INTERPRO	IPR023796:Serpin domain	4	0.560224	0.322621	SERPINA1B, SERPINB1A, SERPINA1C, AGT	615	67	20594	1.99917	1	1	1
INTERPRO	IPR000215:Serpin family	4	0.560224	0.322621	SERPINA1B, SERPINB1A, SERPINA1C, AGT	615	67	20594	1.99917	1	1	1
SMART	SM00093:SERPIN	4	0.560224	0.326475	SERPINA1B, SERPINB1A, SERPINA1C, AGT	314	67	10425	1.98213	1	1	1
GOTERM_MF_DIRECT	GO:0030414~peptidase inhibitor activity	6	0.840336	0.335576	CSTB, SERPINA1B, SERPINB1A, SERPINA1C, SPINT1, WFDC18	543	123	17446	1.56726	1	1	1
UP_KEYWORDS	Serine protease inhibitor	4	0.560224	0.442781	SERPINA1B, SERPINB1A, SERPINA1C, SPINT1	660	84	22680	1.63636	1	1	0.97281
INTERPRO	IPR023795:Protease inhibitor I4, serpin, conserved site	3	0.420168	0.461842	SERPINA1B, SERPINB1A, SERPINA1C	615	52	20594	1.93189	1	1	1
GOTERM_MF_DIRECT	GO:0004867~serine-type endopeptidase inhibitor activity	5	0.70028	0.534079	SERPINA1B, SERPINB1A, SERPINA1C, SPINT1, AGT	543	123	17446	1.30605	1	1	1
Annotation Cluster 39	Enrichment Score: 0.6050617288252695
Category	Term	Count	%	PValue	Genes	List Total	Pop Hits	Pop Total	Fold Enrichment	Bonferroni	Benjamini	FDR
GOTERM_CC_DIRECT	GO:0005778~peroxisomal membrane	5	0.70028	0.0828318	PEX16, CAT, MPV17L, AGPS, DECR2	614	53	19662	3.02102	1	1	0.99802
KEGG_PATHWAY	mmu04146:Peroxisome	5	0.70028	0.313225	PEX16, CAT, MPV17L, AGPS, DECR2	263	83	7691	1.76165	1	0.863171	0.845337
UP_KEYWORDS	Peroxisome	5	0.70028	0.377571	PEX16, CAT, MPV17L, AGPS, DECR2	660	107	22680	1.60578	1	1	0.97281
GOTERM_CC_DIRECT	GO:0005777~peroxisome	6	0.840336	0.387884	PEX16, CAT, MPV17L, AGPS, ISOC1, DECR2	614	131	19662	1.46669	1	1	0.99802
Annotation Cluster 40	Enrichment Score: 0.5963371663372917
Category	Term	Count	%	PValue	Genes	List Total	Pop Hits	Pop Total	Fold Enrichment	Bonferroni	Benjamini	FDR
GOTERM_MF_DIRECT	GO:0008233~peptidase activity	21	2.94118	0.184293	PDIA3, USP24, USP13, USP49, USP20, CMA1, USP33, USP22, SPPL2A, ECEL1, PSEN1, UCHL5, PSMB9, DPP3, AGBL5, PSMA1, FAP, DPEP2, MMP19, ELANE, ADAMTS6	543	516	17446	1.30757	1	1	1
UP_KEYWORDS	Protease	20	2.80112	0.229242	USP24, USP13, USP49, USP20, CMA1, USP33, USP22, SPPL2A, ECEL1, PSEN1, PCSK6, UCHL5, PSMB9, DPP3, AGBL5, PSMA1, FAP, DPEP2, MMP19, ELANE	660	542	22680	1.26803	1	1	0.97281
GOTERM_BP_DIRECT	GO:0006508~proteolysis	21	2.94118	0.384755	USP24, USP13, USP49, USP20, CMA1, USP33, USP22, SPPL2A, ECEL1, ADAM11, PRSS37, PSEN1, UCHL5, PSMB9, DPP3, AGBL5, PSMA1, FAP, DPEP2, MMP19, ELANE	573	582	18082	1.13864	1	1	1
Annotation Cluster 41	Enrichment Score: 0.5947232845922852
Category	Term	Count	%	PValue	Genes	List Total	Pop Hits	Pop Total	Fold Enrichment	Bonferroni	Benjamini	FDR
INTERPRO	IPR011709:Domain of unknown function DUF1605	3	0.420168	0.0898822	DHX32, DHX57, YTHDC2	615	17	20594	5.90933	1	1	1
INTERPRO	IPR007502:Helicase-associated domain	3	0.420168	0.099191	DHX32, DHX57, YTHDC2	615	18	20594	5.58103	1	1	1
SMART	SM00847:SM00847	3	0.420168	0.100305	DHX32, DHX57, YTHDC2	314	18	10425	5.53344	1	1	1
GOTERM_MF_DIRECT	GO:0004004~ATP-dependent RNA helicase activity	5	0.70028	0.13196	DDX28, DHX32, DDX55, DHX57, YTHDC2	543	63	17446	2.54991	1	1	1
UP_KEYWORDS	Helicase	6	0.840336	0.326954	DDX28, DHX32, XRCC5, DDX55, DHX57, YTHDC2	660	130	22680	1.58601	1	1	0.97281
INTERPRO	IPR011545:DNA/RNA helicase, DEAD/DEAH box type, N-terminal	4	0.560224	0.33903	DDX28, DDX55, DHX57, YTHDC2	615	69	20594	1.94123	1	1	1
UP_SEQ_FEATURE	domain:Helicase C-terminal	5	0.70028	0.346952	DDX28, DHX32, DDX55, DHX57, YTHDC2	565	95	18012	1.67788	1	1	1
UP_SEQ_FEATURE	domain:Helicase ATP-binding	5	0.70028	0.368389	DDX28, DHX32, DDX55, DHX57, YTHDC2	565	98	18012	1.62651	1	1	1
GOTERM_MF_DIRECT	GO:0004386~helicase activity	6	0.840336	0.372653	DDX28, DHX32, XRCC5, DDX55, DHX57, YTHDC2	543	129	17446	1.49437	1	1	1
SMART	SM00490:HELICc	5	0.70028	0.408007	DDX28, DDX55, DHX57, YTHDC2, ERCC6	314	108	10425	1.53707	1	1	1
INTERPRO	IPR001650:Helicase, C-terminal	5	0.70028	0.409504	DDX28, DDX55, DHX57, YTHDC2, ERCC6	615	109	20594	1.53606	1	1	1
SMART	SM00487:DEXDc	5	0.70028	0.421579	DDX28, DDX55, DHX57, YTHDC2, ERCC6	314	110	10425	1.50912	1	1	1
INTERPRO	IPR014001:Helicase, superfamily 1/2, ATP-binding domain	5	0.70028	0.422935	DDX28, DDX55, DHX57, YTHDC2, ERCC6	615	111	20594	1.50839	1	1	1
Annotation Cluster 42	Enrichment Score: 0.5780503771487746
Category	Term	Count	%	PValue	Genes	List Total	Pop Hits	Pop Total	Fold Enrichment	Bonferroni	Benjamini	FDR
SMART	SM00326:SH3	9	1.2605	0.240585	EPS8, ARHGAP9, SH3GLB2, FNBP1, CASKIN1, PLCG2, PIK3R2, PTK6, MAPK8IP1	314	197	10425	1.51678	1	1	1
UP_KEYWORDS	SH3 domain	9	1.2605	0.259558	EPS8, ARHGAP9, SH3GLB2, FNBP1, CASKIN1, PLCG2, PIK3R2, PTK6, MAPK8IP1	660	208	22680	1.48689	1	1	0.97281
UP_SEQ_FEATURE	domain:SH3	8	1.12045	0.264729	EPS8, SH3GLB2, FNBP1, CASKIN1, PLCG2, PIK3R2, PTK6, MAPK8IP1	565	166	18012	1.53637	1	1	1
INTERPRO	IPR001452:Src homology-3 domain	9	1.2605	0.294777	EPS8, ARHGAP9, SH3GLB2, FNBP1, CASKIN1, PLCG2, PIK3R2, PTK6, MAPK8IP1	615	212	20594	1.42158	1	1	1
Annotation Cluster 43	Enrichment Score: 0.5704584935576414
Category	Term	Count	%	PValue	Genes	List Total	Pop Hits	Pop Total	Fold Enrichment	Bonferroni	Benjamini	FDR
UP_KEYWORDS	SH2 domain	6	0.840336	0.190554	CHN1, PLCG2, DAPP1, PIK3R2, PTK6, BMX	660	105	22680	1.96364	1	1	0.97281
SMART	SM00252:SH2	6	0.840336	0.197268	CHN1, PLCG2, DAPP1, PIK3R2, PTK6, BMX	314	103	10425	1.93402	1	1	1
INTERPRO	IPR000980:SH2 domain	6	0.840336	0.247947	CHN1, PLCG2, DAPP1, PIK3R2, PTK6, BMX	615	113	20594	1.77803	1	1	1
UP_SEQ_FEATURE	domain:SH2	4	0.560224	0.560703	CHN1, DAPP1, PTK6, BMX	565	93	18012	1.37117	1	1	1
Annotation Cluster 44	Enrichment Score: 0.5686327152921749
Category	Term	Count	%	PValue	Genes	List Total	Pop Hits	Pop Total	Fold Enrichment	Bonferroni	Benjamini	FDR
SMART	SM00271:DnaJ	4	0.560224	0.181579	4930503B20RIK, DNAJC5B, DNAJB14, DNAJC28	314	49	10425	2.71026	1	1	1
INTERPRO	IPR001623:DnaJ domain	4	0.560224	0.201966	4930503B20RIK, DNAJC5B, DNAJB14, DNAJC28	615	52	20594	2.57586	1	1	1
UP_SEQ_FEATURE	domain:J	3	0.420168	0.536733	DNAJC5B, DNAJB14, DNAJC28	565	57	18012	1.67788	1	1	1
Annotation Cluster 45	Enrichment Score: 0.5677159523536326
Category	Term	Count	%	PValue	Genes	List Total	Pop Hits	Pop Total	Fold Enrichment	Bonferroni	Benjamini	FDR
SMART	SM00043:CY	3	0.420168	0.204881	CSTB, AHSG, STFA3	314	28	10425	3.55721	1	1	1
INTERPRO	IPR000010:Proteinase inhibitor I25, cystatin	3	0.420168	0.235918	CSTB, AHSG, STFA3	615	31	20594	3.2406	1	1	1
GOTERM_MF_DIRECT	GO:0004869~cysteine-type endopeptidase inhibitor activity	3	0.420168	0.409816	CSTB, AHSG, STFA3	543	45	17446	2.14193	1	1	1
Annotation Cluster 46	Enrichment Score: 0.5623238604090737
Category	Term	Count	%	PValue	Genes	List Total	Pop Hits	Pop Total	Fold Enrichment	Bonferroni	Benjamini	FDR
UP_SEQ_FEATURE	active site:Glycyl thioester intermediate	6	0.840336	0.114383	UBA6, SMURF1, UBR5, UBE2G1, UBE2J2, UBE2Z	565	82	18012	2.33266	1	1	1
GOTERM_MF_DIRECT	GO:0061631~ubiquitin conjugating enzyme activity	3	0.420168	0.262013	UBE2G1, UBE2J2, UBE2Z	543	32	17446	3.01209	1	1	1
INTERPRO	IPR000608:Ubiquitin-conjugating enzyme, E2	3	0.420168	0.368398	UBE2G1, UBE2J2, UBE2Z	615	43	20594	2.33625	1	1	1
INTERPRO	IPR016135:Ubiquitin-conjugating enzyme/RWD-like	3	0.420168	0.510158	UBE2G1, UBE2J2, UBE2Z	615	57	20594	1.76243	1	1	1
Annotation Cluster 47	Enrichment Score: 0.5548606416183268
Category	Term	Count	%	PValue	Genes	List Total	Pop Hits	Pop Total	Fold Enrichment	Bonferroni	Benjamini	FDR
GOTERM_BP_DIRECT	GO:0045600~positive regulation of fat cell differentiation	5	0.70028	0.0687309	SFRP2, FRZB, CARM1, LRP5, SAV1	573	49	18082	3.22007	1	1	1
GOTERM_MF_DIRECT	GO:0042813~Wnt-activated receptor activity	3	0.420168	0.126846	SFRP2, FRZB, LRP5	543	20	17446	4.81934	1	1	1
GOTERM_MF_DIRECT	GO:0017147~Wnt-protein binding	3	0.420168	0.238791	SFRP2, FRZB, LRP5	543	30	17446	3.21289	1	1	1
UP_KEYWORDS	Wnt signaling pathway	4	0.560224	0.889138	SFRP2, FRZB, LRP5, WDR61	660	176	22680	0.780992	1	1	0.97281
GOTERM_BP_DIRECT	GO:0016055~Wnt signaling pathway	5	0.70028	0.908411	SFRP2, FRZB, MYC, LRP5, WDR61	573	213	18082	0.740768	1	1	1
Annotation Cluster 48	Enrichment Score: 0.552228925184344
Category	Term	Count	%	PValue	Genes	List Total	Pop Hits	Pop Total	Fold Enrichment	Bonferroni	Benjamini	FDR
KEGG_PATHWAY	mmu05012:Parkinson's disease	10	1.40056	0.067773	UBA7, NDUFS4, ATP5A1, UBE2G1, UQCR10, UBE2J2, COX5A, SLC25A4, ATP5G1, GNAI1	263	149	7691	1.96264	1	0.431607	0.422689
UP_KEYWORDS	Mitochondrion inner membrane	10	1.40056	0.319844	ATP5S, APOO, ACADVL, NDUFS4, ATP5A1, UQCR10, SLC25A34, COX5A, SLC25A4, HIGD2A	660	254	22680	1.3529	1	1	0.97281
GOTERM_CC_DIRECT	GO:0005743~mitochondrial inner membrane	15	2.10084	0.326376	ATP5S, ACADVL, ATP5A1, UQCR10, PSEN1, ATP5G1, COX5A, HIGD2A, APOO, SAMM50, CYB5R3, CYP11A1, NDUFS4, SLC25A34, SLC25A4	614	387	19662	1.24119	1	1	0.99802
KEGG_PATHWAY	mmu00190:Oxidative phosphorylation	7	0.980392	0.336363	NDUFS4, ATP5A1, UQCR10, ATP12A, ATP6V1E1, COX5A, ATP5G1	263	139	7691	1.47269	1	0.894503	0.876022
KEGG_PATHWAY	mmu05010:Alzheimer's disease	8	1.12045	0.398511	PPP3CB, PPP3R1, NDUFS4, ATP5A1, UQCR10, PSEN1, COX5A, ATP5G1	263	177	7691	1.32173	1	0.96742	0.947432
KEGG_PATHWAY	mmu05016:Huntington's disease	8	1.12045	0.512467	POLR2B, DCTN1, NDUFS4, ATP5A1, UQCR10, COX5A, SLC25A4, ATP5G1	263	198	7691	1.18155	1	1	0.983402
Annotation Cluster 49	Enrichment Score: 0.5294189310107374
Category	Term	Count	%	PValue	Genes	List Total	Pop Hits	Pop Total	Fold Enrichment	Bonferroni	Benjamini	FDR
UP_SEQ_FEATURE	domain:LIM zinc-binding 1	4	0.560224	0.205818	CSRP2, PXN, CRIP2, LIMS2	565	50	18012	2.55037	1	1	1
UP_SEQ_FEATURE	domain:LIM zinc-binding 2	4	0.560224	0.205818	CSRP2, PXN, CRIP2, LIMS2	565	50	18012	2.55037	1	1	1
UP_KEYWORDS	LIM domain	4	0.560224	0.364535	CSRP2, PXN, CRIP2, LIMS2	660	74	22680	1.85749	1	1	0.97281
INTERPRO	IPR001781:Zinc finger, LIM-type	4	0.560224	0.379878	CSRP2, PXN, CRIP2, LIMS2	615	74	20594	1.81006	1	1	1
SMART	SM00132:LIM	4	0.560224	0.384197	CSRP2, PXN, CRIP2, LIMS2	314	74	10425	1.79463	1	1	1
Annotation Cluster 50	Enrichment Score: 0.5255694181462917
Category	Term	Count	%	PValue	Genes	List Total	Pop Hits	Pop Total	Fold Enrichment	Bonferroni	Benjamini	FDR
GOTERM_MF_DIRECT	GO:0020037~heme binding	9	1.2605	0.178777	CYB5A, GUCY1A2, PGRMC1, PTGES2, CBS, CYP11A1, CAT, LPO, CYP2D26	543	175	17446	1.65234	1	1	1
UP_SEQ_FEATURE	metal ion-binding site:Iron (heme axial ligand)	6	0.840336	0.286145	CYB5A, CBS, CYP11A1, CAT, NOX1, CYP2D26	565	114	18012	1.67788	1	1	1
UP_KEYWORDS	Heme	7	0.980392	0.378403	CYB5A, CBS, CYP11A1, CAT, COX5A, NOX1, CYP2D26	660	171	22680	1.4067	1	1	0.97281
UP_KEYWORDS	Iron	13	1.82073	0.408197	CYB5A, E330017A01RIK, TET2, COX5A, CYP2D26, ALKBH5, PPP3CB, CYP11A1, CBS, CAT, SC5D, NOX1, ISCU	660	375	22680	1.19127	1	1	0.97281
Annotation Cluster 51	Enrichment Score: 0.5150243675434815
Category	Term	Count	%	PValue	Genes	List Total	Pop Hits	Pop Total	Fold Enrichment	Bonferroni	Benjamini	FDR
INTERPRO	IPR002172:Low-density lipoprotein (LDL) receptor class A repeat	4	0.560224	0.186695	MAMDC4, SPINT1, PRKCSH, LRP5	615	50	20594	2.67889	1	1	1
INTERPRO	IPR023415:Low-density lipoprotein (LDL) receptor class A, conserved site	3	0.420168	0.368398	MAMDC4, SPINT1, LRP5	615	43	20594	2.33625	1	1	1
SMART	SM00192:LDLa	3	0.420168	0.414455	MAMDC4, SPINT1, LRP5	314	47	10425	2.11919	1	1	1
Annotation Cluster 52	Enrichment Score: 0.5100844701023795
Category	Term	Count	%	PValue	Genes	List Total	Pop Hits	Pop Total	Fold Enrichment	Bonferroni	Benjamini	FDR
INTERPRO	IPR003593:AAA+ ATPase domain	7	0.980392	0.259984	DYNC1H1, ABCA5, PSMC4, KATNA1, SRP54C, ABCF3, MDN1	615	144	20594	1.6278	1	1	1
SMART	SM00382:AAA	7	0.980392	0.264661	DYNC1H1, ABCA5, PSMC4, KATNA1, SRP54C, ABCF3, MDN1	314	144	10425	1.61392	1	1	1
GOTERM_MF_DIRECT	GO:0016887~ATPase activity	8	1.12045	0.428657	DYNC1H1, ENTPD2, ABCA5, KATNA1, ATP5A1, ABCF3, MDN1, MLH3	543	200	17446	1.28516	1	1	1
Annotation Cluster 53	Enrichment Score: 0.49088311956510833
Category	Term	Count	%	PValue	Genes	List Total	Pop Hits	Pop Total	Fold Enrichment	Bonferroni	Benjamini	FDR
GOTERM_CC_DIRECT	GO:0005604~basement membrane	6	0.840336	0.185735	SPN, SMOC2, GSTO1, LAMC2, NID1, THBS4	614	97	19662	1.98079	1	1	0.99802
UP_KEYWORDS	Basement membrane	3	0.420168	0.270549	SMOC2, LAMC2, NID1	660	35	22680	2.94545	1	1	0.97281
GOTERM_BP_DIRECT	GO:0030198~extracellular matrix organization	6	0.840336	0.293254	SMOC2, SPINT1, LAMC2, NID1, AGT, NOX1	573	114	18082	1.66088	1	1	1
UP_SEQ_FEATURE	short sequence motif:Cell attachment site	4	0.560224	0.451612	SEMA7A, LAMC2, NID1, THBS4	565	79	18012	1.61416	1	1	1
UP_KEYWORDS	Extracellular matrix	8	1.12045	0.52776	RTBDN, SMOC2, CHADL, MMP19, LAMC2, NID1, THBS4, ASPN	660	235	22680	1.16983	1	1	0.97281
Annotation Cluster 54	Enrichment Score: 0.487810394609329
Category	Term	Count	%	PValue	Genes	List Total	Pop Hits	Pop Total	Fold Enrichment	Bonferroni	Benjamini	FDR
UP_KEYWORDS	Proteasome	4	0.560224	0.222089	PSMA1, PSMC4, UCHL5, PSMB9	660	56	22680	2.45455	1	1	0.97281
GOTERM_CC_DIRECT	GO:0000502~proteasome complex	4	0.560224	0.339169	PSMA1, PSMC4, UCHL5, PSMB9	614	66	19662	1.94078	1	1	0.99802
KEGG_PATHWAY	mmu03050:Proteasome	3	0.420168	0.456693	PSMA1, PSMC4, PSMB9	263	45	7691	1.94956	1	1	0.983402
Annotation Cluster 55	Enrichment Score: 0.470449135239883
Category	Term	Count	%	PValue	Genes	List Total	Pop Hits	Pop Total	Fold Enrichment	Bonferroni	Benjamini	FDR
INTERPRO	IPR000832:GPCR, family 2, secretin-like	4	0.560224	0.157162	GLP1R, ADGRG1, ADGRF5, GPR157	615	46	20594	2.91184	1	1	1
INTERPRO	IPR017981:GPCR, family 2-like	4	0.560224	0.249282	GLP1R, ADGRG1, ADGRF5, GPR157	615	58	20594	2.30939	1	1	1
GOTERM_BP_DIRECT	GO:0007166~cell surface receptor signaling pathway	9	1.2605	0.387704	SPN, GLP1R, ADGRG1, NUP62, ADGRF5, PIK3CD, MYD88, AGT, GPR157	573	219	18082	1.29685	1	1	1
GOTERM_MF_DIRECT	GO:0004888~transmembrane signaling receptor activity	8	1.12045	0.8643	GLP1R, OLFR1284, ADGRG1, OLFR430, NFAM1, ADGRF5, TLR7, GPR157	543	316	17446	0.81339	1	1	1
Annotation Cluster 56	Enrichment Score: 0.46554062139619545
Category	Term	Count	%	PValue	Genes	List Total	Pop Hits	Pop Total	Fold Enrichment	Bonferroni	Benjamini	FDR
INTERPRO	IPR018097:EGF-like calcium-binding, conserved site	6	0.840336	0.163751	JAG2, CCBE1, PROS1, FAT1, NID1, THBS4	615	97	20594	2.07131	1	1	1
SMART	SM00181:EGF	9	1.2605	0.177856	JAG2, CCBE1, PROS1, FAT1, LRP5, LAMC2, PCSK6, NID1, THBS4	314	181	10425	1.65086	1	1	1
INTERPRO	IPR013032:EGF-like, conserved site	9	1.2605	0.235711	JAG2, CCBE1, PROS1, ADAM11, FAT1, LAMC2, NAGPA, NID1, THBS4	615	197	20594	1.52983	1	1	1
UP_SEQ_FEATURE	domain:EGF-like 4	4	0.560224	0.247311	JAG2, LRP5, NID1, THBS4	565	55	18012	2.31852	1	1	1
INTERPRO	IPR000742:Epidermal growth factor-like domain	10	1.40056	0.272798	JAG2, CCBE1, PROS1, ADAM11, FAT1, LRP5, LAMC2, PCSK6, NID1, THBS4	615	237	20594	1.41292	1	1	1
INTERPRO	IPR001881:EGF-like calcium-binding	6	0.840336	0.322836	JAG2, CCBE1, PROS1, FAT1, NID1, THBS4	615	126	20594	1.59458	1	1	1
UP_KEYWORDS	EGF-like domain	9	1.2605	0.32721	JAG2, CCBE1, PROS1, ADAM11, FAT1, LRP5, NAGPA, NID1, THBS4	660	224	22680	1.38068	1	1	0.97281
SMART	SM00179:EGF_CA	6	0.840336	0.327896	JAG2, CCBE1, PROS1, FAT1, NID1, THBS4	314	126	10425	1.58098	1	1	1
INTERPRO	IPR000152:EGF-type aspartate/asparagine hydroxylation site	5	0.70028	0.334916	JAG2, CCBE1, PROS1, FAT1, NID1	615	98	20594	1.70848	1	1	1
INTERPRO	IPR009030:Insulin-like growth factor binding protein, N-terminal	6	0.840336	0.34645	JAG2, INSR, PROS1, FAT1, PCSK6, NID1	615	130	20594	1.54552	1	1	1
UP_SEQ_FEATURE	domain:EGF-like 3; calcium-binding	3	0.420168	0.357772	PROS1, NID1, THBS4	565	40	18012	2.39097	1	1	1
UP_SEQ_FEATURE	domain:EGF-like 1	5	0.70028	0.460048	JAG2, PROS1, LRP5, NID1, THBS4	565	111	18012	1.43602	1	1	1
INTERPRO	IPR001791:Laminin G domain	3	0.420168	0.519475	PROS1, FAT1, THBS4	615	58	20594	1.73204	1	1	1
UP_SEQ_FEATURE	domain:EGF-like 2	3	0.420168	0.744017	JAG2, LRP5, NID1	565	84	18012	1.13856	1	1	1
INTERPRO	IPR013320:Concanavalin A-like lectin/glucanase, subgroup	5	0.70028	0.87801	MAMDC4, FSD1L, PROS1, FAT1, THBS4	615	211	20594	0.793511	1	1	1
Annotation Cluster 57	Enrichment Score: 0.4539820613486214
Category	Term	Count	%	PValue	Genes	List Total	Pop Hits	Pop Total	Fold Enrichment	Bonferroni	Benjamini	FDR
INTERPRO	IPR013766:Thioredoxin domain	3	0.420168	0.335786	PDIA3, TXNDC15, PDIA4	615	40	20594	2.51146	1	1	1
GOTERM_BP_DIRECT	GO:0045454~cell redox homeostasis	4	0.560224	0.338764	PDIA3, PTGES2, TXNDC15, PDIA4	573	65	18082	1.94195	1	1	1
INTERPRO	IPR012336:Thioredoxin-like fold	6	0.840336	0.382027	PDIA3, PTGES2, GSTO1, EEF1E1, TXNDC15, PDIA4	615	136	20594	1.47733	1	1	1
Annotation Cluster 58	Enrichment Score: 0.44204122845907856
Category	Term	Count	%	PValue	Genes	List Total	Pop Hits	Pop Total	Fold Enrichment	Bonferroni	Benjamini	FDR
UP_KEYWORDS	Steroid biosynthesis	3	0.420168	0.303053	CYB5R3, SC5D, ACBD3	660	38	22680	2.71292	1	1	0.97281
GOTERM_BP_DIRECT	GO:0006694~steroid biosynthetic process	4	0.560224	0.31262	CYB5R3, CYP11A1, SC5D, ACBD3	573	62	18082	2.03592	1	1	1
UP_KEYWORDS	Lipid biosynthesis	6	0.840336	0.498128	CYB5R3, PTGES2, AGPS, PRKAG2, SC5D, ACBD3	660	160	22680	1.28864	1	1	0.97281
Annotation Cluster 59	Enrichment Score: 0.4407355172256428
Category	Term	Count	%	PValue	Genes	List Total	Pop Hits	Pop Total	Fold Enrichment	Bonferroni	Benjamini	FDR
UP_KEYWORDS	Sterol metabolism	4	0.560224	0.268884	CYB5R3, CYP11A1, SC5D, ERLIN2	660	62	22680	2.21701	1	1	0.97281
GOTERM_BP_DIRECT	GO:0008203~cholesterol metabolic process	5	0.70028	0.310682	CYB5R3, CYP11A1, CAT, LRP5, ERLIN2	573	89	18082	1.77285	1	1	1
GOTERM_BP_DIRECT	GO:0006694~steroid biosynthetic process	4	0.560224	0.31262	CYB5R3, CYP11A1, SC5D, ACBD3	573	62	18082	2.03592	1	1	1
UP_KEYWORDS	Steroid metabolism	4	0.560224	0.364535	CYB5R3, CYP11A1, SC5D, ERLIN2	660	74	22680	1.85749	1	1	0.97281
UP_KEYWORDS	Cholesterol metabolism	3	0.420168	0.477533	CYB5R3, CYP11A1, ERLIN2	660	55	22680	1.87438	1	1	0.97281
GOTERM_BP_DIRECT	GO:0008202~steroid metabolic process	4	0.560224	0.498823	CYB5R3, CYP11A1, SC5D, ERLIN2	573	84	18082	1.5027	1	1	1
Annotation Cluster 60	Enrichment Score: 0.439147382174224
Category	Term	Count	%	PValue	Genes	List Total	Pop Hits	Pop Total	Fold Enrichment	Bonferroni	Benjamini	FDR
UP_SEQ_FEATURE	domain:PDZ	6	0.840336	0.209931	TIAM2, PCLO, MAST3, GIPC2, SHROOM3, LIN7B	565	101	18012	1.89384	1	1	1
SMART	SM00228:PDZ	6	0.840336	0.470693	TIAM2, PCLO, MAST3, GIPC2, SHROOM3, LIN7B	314	150	10425	1.32803	1	1	1
INTERPRO	IPR001478:PDZ domain	6	0.840336	0.48724	TIAM2, PCLO, MAST3, GIPC2, SHROOM3, LIN7B	615	154	20594	1.30466	1	1	1
Annotation Cluster 61	Enrichment Score: 0.4358551640158004
Category	Term	Count	%	PValue	Genes	List Total	Pop Hits	Pop Total	Fold Enrichment	Bonferroni	Benjamini	FDR
GOTERM_BP_DIRECT	GO:0006469~negative regulation of protein kinase activity	7	0.980392	0.0806569	LRRTM3, AKT1S1, PRKAG2, PSEN1, PKIG, ASPN, LRRC4B	573	95	18082	2.32523	1	1	1
GOTERM_MF_DIRECT	GO:0004860~protein kinase inhibitor activity	5	0.70028	0.10066	CDKN1B, LRRTM3, PKIG, ASPN, LRRC4B	543	57	17446	2.81833	1	1	1
SMART	SM00082:LRRCT	5	0.70028	0.18804	LRG1, CHADL, TLR7, LRIG2, LRRC4B	314	75	10425	2.21338	1	1	1
INTERPRO	IPR000483:Cysteine-rich flanking region, C-terminal	5	0.70028	0.191201	LRG1, CHADL, TLR7, LRIG2, LRRC4B	615	76	20594	2.20304	1	1	1
INTERPRO	IPR000372:Leucine-rich repeat-containing N-terminal	4	0.560224	0.209708	LRRTM3, CHADL, ASPN, LRRC4B	615	53	20594	2.52726	1	1	1
SMART	SM00013:LRRNT	4	0.560224	0.212452	LRRTM3, CHADL, ASPN, LRRC4B	314	53	10425	2.50571	1	1	1
INTERPRO	IPR003591:Leucine-rich repeat, typical subtype	8	1.12045	0.267908	LRG1, LRRTM3, CHADL, TLR7, LRIG2, LRWD1, ASPN, LRRC4B	615	175	20594	1.5308	1	1	1
SMART	SM00369:LRR_TYP	8	1.12045	0.273066	LRG1, LRRTM3, CHADL, TLR7, LRIG2, LRWD1, ASPN, LRRC4B	314	175	10425	1.51774	1	1	1
UP_KEYWORDS	Leucine-rich repeat	11	1.54062	0.279935	ATP5S, LRG1, LRRTM3, CHADL, TLR7, LRIG2, LRWD1, FBXL13, CEP97, ASPN, LRRC4B	660	275	22680	1.37455	1	1	0.97281
UP_SEQ_FEATURE	repeat:LRR 9	6	0.840336	0.341561	LRRTM3, TLR7, LRIG2, FBXL13, ASPN, LRRC4B	565	123	18012	1.5551	1	1	1
INTERPRO	IPR001611:Leucine-rich repeat	10	1.40056	0.362053	LRG1, LRRTM3, CHADL, TLR7, LRIG2, LRWD1, FBXL13, CEP97, ASPN, LRRC4B	615	259	20594	1.2929	1	1	1
UP_SEQ_FEATURE	repeat:LRR 7	7	0.980392	0.374575	LRRTM3, TLR7, LRIG2, FBXL13, CEP97, ASPN, LRRC4B	565	158	18012	1.41239	1	1	1
GOTERM_BP_DIRECT	GO:0046426~negative regulation of JAK-STAT cascade	3	0.420168	0.396518	LRRTM3, ASPN, LRRC4B	573	43	18082	2.20163	1	1	1
UP_SEQ_FEATURE	repeat:LRR 8	6	0.840336	0.410086	LRRTM3, TLR7, LRIG2, FBXL13, ASPN, LRRC4B	565	134	18012	1.42745	1	1	1
GOTERM_BP_DIRECT	GO:0019221~cytokine-mediated signaling pathway	6	0.840336	0.492545	CCL12, LRRTM3, IL1F8, MYD88, ASPN, LRRC4B	573	146	18082	1.29685	1	1	1
UP_SEQ_FEATURE	repeat:LRR 6	7	0.980392	0.554559	LRRTM3, TLR7, LRIG2, FBXL13, CEP97, ASPN, LRRC4B	565	191	18012	1.16836	1	1	1
UP_SEQ_FEATURE	repeat:LRR 10	4	0.560224	0.630076	LRRTM3, TLR7, LRIG2, ASPN	565	103	18012	1.23804	1	1	1
UP_SEQ_FEATURE	repeat:LRR 5	7	0.980392	0.646752	LRRTM3, TLR7, LRIG2, FBXL13, CEP97, ASPN, LRRC4B	565	210	18012	1.06265	1	1	1
UP_SEQ_FEATURE	repeat:LRR 3	8	1.12045	0.682512	LRRTM3, TLR7, LRIG2, LRWD1, FBXL13, CEP97, ASPN, LRRC4B	565	253	18012	1.00805	1	1	1
UP_SEQ_FEATURE	repeat:LRR 12	3	0.420168	0.712804	TLR7, LRIG2, ASPN	565	79	18012	1.21062	1	1	1
UP_SEQ_FEATURE	repeat:LRR 4	7	0.980392	0.722558	LRRTM3, TLR7, LRIG2, FBXL13, CEP97, ASPN, LRRC4B	565	228	18012	0.978761	1	1	1
UP_SEQ_FEATURE	repeat:LRR 1	8	1.12045	0.758526	LRRTM3, TLR7, LRIG2, LRWD1, FBXL13, CEP97, ASPN, LRRC4B	565	274	18012	0.930793	1	1	1
UP_SEQ_FEATURE	repeat:LRR 2	8	1.12045	0.758526	LRRTM3, TLR7, LRIG2, LRWD1, FBXL13, CEP97, ASPN, LRRC4B	565	274	18012	0.930793	1	1	1
UP_SEQ_FEATURE	repeat:LRR 11	3	0.420168	0.766854	TLR7, LRIG2, ASPN	565	88	18012	1.08681	1	1	1
Annotation Cluster 62	Enrichment Score: 0.42835361728084625
Category	Term	Count	%	PValue	Genes	List Total	Pop Hits	Pop Total	Fold Enrichment	Bonferroni	Benjamini	FDR
KEGG_PATHWAY	mmu04924:Renin secretion	5	0.70028	0.222421	GUCY1A2, PPP3CB, PPP3R1, GNAI1, AGT	263	71	7691	2.05939	1	0.772517	0.756556
KEGG_PATHWAY	mmu04360:Axon guidance	7	0.980392	0.276423	CDC42, PPP3CB, PPP3R1, SEMA7A, EFNB3, DCC, GNAI1	263	129	7691	1.58685	1	0.83618	0.818903
KEGG_PATHWAY	mmu04022:cGMP-PKG signaling pathway	8	1.12045	0.320179	GUCY1A2, PPP3CB, PPP3R1, INSR, AKT2, SRF, SLC25A4, GNAI1	263	163	7691	1.43526	1	0.8706	0.852612
KEGG_PATHWAY	mmu04921:Oxytocin signaling pathway	7	0.980392	0.403758	RCAN1, GUCY1A2, PPP3CB, PPP3R1, PRKAG2, CACNG2, GNAI1	263	150	7691	1.36469	1	0.96742	0.947432
KEGG_PATHWAY	mmu04724:Glutamatergic synapse	3	0.420168	0.907751	PPP3CB, PPP3R1, GNAI1	263	115	7691	0.76287	1	1	0.983402
Annotation Cluster 63	Enrichment Score: 0.4234550742087543
Category	Term	Count	%	PValue	Genes	List Total	Pop Hits	Pop Total	Fold Enrichment	Bonferroni	Benjamini	FDR
INTERPRO	IPR012677:Nucleotide-binding, alpha-beta plait	12	1.68067	0.216098	MTHFSD, RCAN1, RBM15B, SYNJ1, RBM4B, SNRPB2, SAFB, SRSF6, LEMD3, SRSF7, RBMS2, CPEB4	615	281	20594	1.43001	1	1	1
INTERPRO	IPR000504:RNA recognition motif domain	10	1.40056	0.282693	MTHFSD, RBM15B, SYNJ1, RBM4B, SNRPB2, SAFB, SRSF6, SRSF7, RBMS2, CPEB4	615	241	20594	1.38947	1	1	1
SMART	SM00360:RRM	9	1.2605	0.382034	MTHFSD, RBM15B, RBM4B, SNRPB2, SAFB, SRSF6, SRSF7, RBMS2, CPEB4	314	229	10425	1.30483	1	1	1
UP_SEQ_FEATURE	domain:RRM 1	5	0.70028	0.571911	RBM15B, RBM4B, SNRPB2, RBMS2, CPEB4	565	128	18012	1.2453	1	1	1
UP_SEQ_FEATURE	domain:RRM 2	5	0.70028	0.571911	RBM15B, RBM4B, SNRPB2, RBMS2, CPEB4	565	128	18012	1.2453	1	1	1
Annotation Cluster 64	Enrichment Score: 0.41949095935687036
Category	Term	Count	%	PValue	Genes	List Total	Pop Hits	Pop Total	Fold Enrichment	Bonferroni	Benjamini	FDR
GOTERM_MF_DIRECT	GO:0000978~RNA polymerase II core promoter proximal region sequence-specific DNA binding	17	2.38095	0.0954274	SMAD2, ZGPAT, BCL11B, ONECUT2, NFYA, EED, SRF, MBD2, SIX1, FOXP4, POU2F2, BMI1, NR4A3, NR5A2, MYC, TCF3, CC2D1A	543	359	17446	1.52142	1	1	1
GOTERM_MF_DIRECT	GO:0001077~transcriptional activator activity, RNA polymerase II core promoter proximal region sequence-specific binding	12	1.68067	0.220191	BARHL1, SMAD2, NR5A2, NR4A3, BCL11B, ONECUT2, NFYA, SRF, MYC, SIX1, TCF3, POU2F2	543	270	17446	1.42795	1	1	1
GOTERM_BP_DIRECT	GO:0045944~positive regulation of transcription from RNA polymerase II promoter	32	4.48179	0.56217	BARHL1, GLP1R, ONECUT2, SRF, LRP5, SIX1, WDR61, PIK3R2, IKZF2, PPP3CB, PPP3R1, AKT2, MYC, SMAD2, BCL11B, NFYA, FOXH1, TET2, HFE2, GTF2H1, SAFB, POU2F2, SMAD5, PIAS2, SGSM1, NR4A3, SFRP2, NR5A2, TNIP2, CARM1, RARA, TCF3	573	995	18082	1.01489	1	1	1
GOTERM_MF_DIRECT	GO:0043565~sequence-specific DNA binding	18	2.52101	0.765268	BARHL1, TGIF2LX1, ZGPAT, BCL11B, NFYA, SRF, FOXH1, SIX1, SAFB, FOXP4, POU2F2, BMI1, NR4A3, NR5A2, MYC, RARA, HOXB3, TCF3	543	633	17446	0.913618	1	1	1
GOTERM_MF_DIRECT	GO:0003700~transcription factor activity, sequence-specific DNA binding	23	3.22129	0.883876	ZFP612, SMAD2, ZFP358, ZGPAT, ONECUT2, NFYA, SRF, SS18L1, FOXH1, SIX1, ZFP60, FOXP4, POU2F2, IKZF2, SMAD5, SNAPC5, NR4A3, NR5A2, MYC, RARA, HOXB3, TCF3, ZFP772	543	883	17446	0.83688	1	1	1
Annotation Cluster 65	Enrichment Score: 0.41609234569452314
Category	Term	Count	%	PValue	Genes	List Total	Pop Hits	Pop Total	Fold Enrichment	Bonferroni	Benjamini	FDR
UP_SEQ_FEATURE	domain:GST C-terminal	3	0.420168	0.369128	PTGES2, GSTO1, EEF1E1	565	41	18012	2.33266	1	1	1
INTERPRO	IPR012336:Thioredoxin-like fold	6	0.840336	0.382027	PDIA3, PTGES2, GSTO1, EEF1E1, TXNDC15, PDIA4	615	136	20594	1.47733	1	1	1
INTERPRO	IPR010987:Glutathione S-transferase, C-terminal-like	3	0.420168	0.400362	PTGES2, GSTO1, EEF1E1	615	46	20594	2.18388	1	1	1
Annotation Cluster 66	Enrichment Score: 0.41240526775387315
Category	Term	Count	%	PValue	Genes	List Total	Pop Hits	Pop Total	Fold Enrichment	Bonferroni	Benjamini	FDR
UP_KEYWORDS	ER-Golgi transport	5	0.70028	0.253027	RAB2A, COPB2, KDELR2, COPE, YIF1A	660	88	22680	1.95248	1	1	0.97281
GOTERM_BP_DIRECT	GO:0006888~ER to Golgi vesicle-mediated transport	4	0.560224	0.449987	COPB2, SEC24D, COPE, YIF1A	573	78	18082	1.61829	1	1	1
GOTERM_BP_DIRECT	GO:0016192~vesicle-mediated transport	8	1.12045	0.508649	RAB2A, COPB2, STX16, FNBP1, KDELR2, COPE, YIF1A, MAPK8IP1	573	213	18082	1.18523	1	1	1
Annotation Cluster 67	Enrichment Score: 0.39250023646025956
Category	Term	Count	%	PValue	Genes	List Total	Pop Hits	Pop Total	Fold Enrichment	Bonferroni	Benjamini	FDR
UP_KEYWORDS	Inflammatory response	9	1.2605	0.0981199	CCL12, SEMA7A, TNIP2, IL1F8, LY86, PIK3CD, FFAR3, TLR7, MYD88	660	161	22680	1.92095	1	0.857258	0.831437
UP_KEYWORDS	Innate immunity	9	1.2605	0.401695	C1QBP, IL1F8, LY86, PIK3CD, TLR7, MST1R, CD55, MYD88, ATG5	660	241	22680	1.28329	1	1	0.97281
GOTERM_BP_DIRECT	GO:0032755~positive regulation of interleukin-6 production	3	0.420168	0.493043	IL1F8, TLR7, MYD88	573	52	18082	1.82058	1	1	1
UP_KEYWORDS	Immunity	13	1.82073	0.500979	H2-DMA, IL1F8, LY86, PIK3CD, MST1R, PSMB9, PSMA1, C1QBP, FFAR3, TLR7, CD55, MYD88, ATG5	660	401	22680	1.11403	1	1	0.97281
GOTERM_BP_DIRECT	GO:0002376~immune system process	13	1.82073	0.554941	H2-DMA, IL1F8, LY86, PIK3CD, MST1R, PSMB9, PSMA1, C1QBP, FFAR3, TLR7, CD55, MYD88, ATG5	573	383	18082	1.07112	1	1	1
GOTERM_BP_DIRECT	GO:0045087~innate immune response	11	1.54062	0.817324	C1QBP, IL1F8, LY86, PIK3CD, TLR7, PTK6, MST1R, BMX, CD55, MYD88, ATG5	573	400	18082	0.86781	1	1	1
Annotation Cluster 68	Enrichment Score: 0.38453012780187246
Category	Term	Count	%	PValue	Genes	List Total	Pop Hits	Pop Total	Fold Enrichment	Bonferroni	Benjamini	FDR
UP_SEQ_FEATURE	region of interest:Ligand-binding	3	0.420168	0.229858	NR5A2, NR4A3, RARA	565	29	18012	3.29789	1	1	1
GOTERM_MF_DIRECT	GO:0004879~RNA polymerase II transcription factor activity, ligand-activated sequence-specific DNA binding	3	0.420168	0.308405	NR5A2, NR4A3, RARA	543	36	17446	2.67741	1	1	1
INTERPRO	IPR001628:Zinc finger, nuclear hormone receptor-type	3	0.420168	0.410849	NR5A2, NR4A3, RARA	615	47	20594	2.13742	1	1	1
SMART	SM00399:ZnF_C4	3	0.420168	0.414455	NR5A2, NR4A3, RARA	314	47	10425	2.11919	1	1	1
INTERPRO	IPR001723:Steroid hormone receptor	3	0.420168	0.421244	NR5A2, NR4A3, RARA	615	48	20594	2.09289	1	1	1
INTERPRO	IPR000536:Nuclear hormone receptor, ligand-binding, core	3	0.420168	0.431545	NR5A2, NR4A3, RARA	615	49	20594	2.05017	1	1	1
SMART	SM00430:HOLI	3	0.420168	0.435261	NR5A2, NR4A3, RARA	314	49	10425	2.03269	1	1	1
UP_SEQ_FEATURE	DNA-binding region:Nuclear receptor	3	0.420168	0.435382	NR5A2, NR4A3, RARA	565	47	18012	2.03487	1	1	1
UP_SEQ_FEATURE	zinc finger region:NR C4-type	3	0.420168	0.435382	NR5A2, NR4A3, RARA	565	47	18012	2.03487	1	1	1
GOTERM_BP_DIRECT	GO:0043401~steroid hormone mediated signaling pathway	3	0.420168	0.50316	NR5A2, NR4A3, RARA	573	53	18082	1.78623	1	1	1
INTERPRO	IPR013088:Zinc finger, NHR/GATA-type	3	0.420168	0.510158	NR5A2, NR4A3, RARA	615	57	20594	1.76243	1	1	1
GOTERM_MF_DIRECT	GO:0003707~steroid hormone receptor activity	3	0.420168	0.522924	NR5A2, NR4A3, RARA	543	56	17446	1.72119	1	1	1
Annotation Cluster 69	Enrichment Score: 0.36855394682138937
Category	Term	Count	%	PValue	Genes	List Total	Pop Hits	Pop Total	Fold Enrichment	Bonferroni	Benjamini	FDR
SMART	SM00312:PX	3	0.420168	0.36088	PXK, SNX2, SNX25	314	42	10425	2.37147	1	1	1
UP_SEQ_FEATURE	domain:PX	3	0.420168	0.391593	PXK, SNX2, SNX25	565	43	18012	2.22416	1	1	1
INTERPRO	IPR001683:Phox homologous domain	3	0.420168	0.451847	PXK, SNX2, SNX25	615	51	20594	1.96978	1	1	1
GOTERM_MF_DIRECT	GO:0035091~phosphatidylinositol binding	4	0.560224	0.525526	PXK, SNX2, EXOC8, SNX25	543	89	17446	1.444	1	1	1
Annotation Cluster 70	Enrichment Score: 0.3584196573390583
Category	Term	Count	%	PValue	Genes	List Total	Pop Hits	Pop Total	Fold Enrichment	Bonferroni	Benjamini	FDR
UP_KEYWORDS	Transcription	61	8.54342	0.213392	BARHL1, ONECUT2, SIX1, BMI1, IKZF2, PHF6, SNAPC5, SFR1, KHSRP, MYC, C1QBP, ADNP2, NELFB, VPS36, WHSC1L1, ZGPAT, EED, FOXH1, ACTR8, SAFB, FOXP4, BAZ1B, MED26, UCHL5, PIAS2, MED7, NR5A2, MDFIC, SUB1, KAT6A, TRNP1, RARA, POLR1E, HOXB3, SRF, WDR61, ARHGAP22, RBM15B, POLR2B, SMAD2, BCL11B, NFYA, XRCC5, GTF2IRD2, SS18L1, USP22, MBD2, GTF2H1, HIPK1, POU2F2, PTPN14, SMAD5, LRPPRC, MED13L, PNRC2, ZBTB6, N…	660	1859	22680	1.12759	1	1	0.97281
UP_KEYWORDS	Transcription regulation	59	8.26331	0.216712	BARHL1, ONECUT2, SIX1, BMI1, IKZF2, PHF6, SNAPC5, SFR1, KHSRP, MYC, C1QBP, ADNP2, NELFB, VPS36, WHSC1L1, ZGPAT, EED, FOXH1, ACTR8, SAFB, FOXP4, BAZ1B, MED26, UCHL5, PIAS2, MED7, NR5A2, MDFIC, SUB1, KAT6A, TRNP1, RARA, HOXB3, SRF, WDR61, ARHGAP22, RBM15B, SMAD2, BCL11B, NFYA, XRCC5, GTF2IRD2, SS18L1, USP22, MBD2, GTF2H1, HIPK1, POU2F2, PTPN14, SMAD5, LRPPRC, MED13L, PNRC2, ZBTB6, NR4A3, TNIP2, CAR…	660	1799	22680	1.12699	1	1	0.97281
GOTERM_BP_DIRECT	GO:0006351~transcription, DNA-templated	62	8.68347	0.445039	BARHL1, ONECUT2, SIX1, BMI1, IKZF2, PHF6, SNAPC5, SFR1, KHSRP, MYC, C1QBP, NUP62, ADNP2, NELFB, VPS36, WHSC1L1, ZGPAT, EED, FOXH1, ACTR8, SAFB, FOXP4, BAZ1B, MED26, UCHL5, PIAS2, MED7, NR5A2, MDFIC, SUB1, KAT6A, TRNP1, RARA, POLR1E, HOXB3, SRF, WDR61, ARHGAP22, RBM15B, POLR2B, SMAD2, BCL11B, NFYA, XRCC5, GTF2IRD2, SS18L1, USP22, MBD2, GTF2H1, HIPK1, POU2F2, PTPN14, SMAD5, LRPPRC, MED13L, PNRC2, Z…	573	1885	18082	1.03794	1	1	1
GOTERM_BP_DIRECT	GO:0006355~regulation of transcription, DNA-templated	70	9.80392	0.672952	BARHL1, ZFP729A, ONECUT2, SIX1, BMI1, IKZF2, PHF6, SNAPC5, SFR1, KHSRP, MYC, C1QBP, ADNP2, NELFB, VPS36, WHSC1L1, ZFP612, ZGPAT, NUP133, EED, FOXH1, ACTR8, SAFB, FOXP4, BAZ1B, MED26, UCHL5, PIAS2, MAPK8IP1, MED7, NR5A2, MDFIC, SUB1, KAT6A, TRNP1, RARA, HOXB3, ZFP772, USP13, TGIF2LX1, SRF, ZFP866, WDR61, ZFP60, ARHGAP22, RBM15B, NDNL2, SMAD2, BCL11B, NFYA, XRCC5, GTF2IRD2, SS18L1, INSR, USP22, MBD…	573	2279	18082	0.969272	1	1	1
UP_KEYWORDS	DNA-binding	45	6.30252	0.678255	BARHL1, TGIF2LX1, PCNA, ONECUT2, SRF, HIST1H1T, SIX1, ZFP60, IKZF2, PHF6, TERT, MYC, KHSRP, ADNP2, HIST1H2AB, HMGN1, SMAD2, HIST1H2AO, ZGPAT, NFYA, XRCC5, 0610010K14RIK, GTF2IRD2, FOXH1, MBD2, ZFR, TET2, SAFB, FOXP4, POU2F2, LEMD3, SMAD5, PIAS2, LRPPRC, NR4A3, ZBTB6, NR5A2, SUB1, TRNP1, RARA, NABP2, HOXB3, TCF3, HIST1H2BA, CC2D1A	660	1604	22680	0.964067	1	1	0.97281
GOTERM_MF_DIRECT	GO:0003677~DNA binding	54	7.56303	0.752744	BARHL1, ONECUT2, HIST1H1T, SIX1, IKZF2, PHF6, ZMYM1, KHSRP, MYC, ADNP2, HIST1H2AB, HMGN1, HIST1H2AO, ZGPAT, FOXH1, ZBTB37, ZFR, TET2, SAFB, FOXP4, LEMD3, MED26, PIAS2, NR5A2, SUB1, KAT6A, TRNP1, RARA, POLR1E, HOXB3, HIST1H2BA, PCNA, SRF, ZFP60, TERT, POLR2B, SMAD2, NFYA, 0610010K14RIK, XRCC5, PTGES2, GTF2IRD2, SS18L1, MBD2, HIPK1, POU2F2, SMAD5, LRPPRC, ZBTB6, NR4A3, NABP2, TCF3, ERCC6, CC2D1A	543	1847	17446	0.93934	1	1	1
Annotation Cluster 71	Enrichment Score: 0.34826177032481737
Category	Term	Count	%	PValue	Genes	List Total	Pop Hits	Pop Total	Fold Enrichment	Bonferroni	Benjamini	FDR
INTERPRO	IPR003595:Protein-tyrosine phosphatase, catalytic	4	0.560224	0.289843	DUSP2, MTMR3, PTPN14, PTPRF	615	63	20594	2.12611	1	1	1
SMART	SM00404:PTPc_motif	4	0.560224	0.293401	DUSP2, MTMR3, PTPN14, PTPRF	314	63	10425	2.10798	1	1	1
INTERPRO	IPR016130:Protein-tyrosine phosphatase, active site	4	0.560224	0.371742	DUSP2, MTMR3, PTPN14, PTPRF	615	73	20594	1.83486	1	1	1
GOTERM_MF_DIRECT	GO:0004721~phosphoprotein phosphatase activity	6	0.840336	0.434294	PPP3CB, DUSP2, PPP3R1, MTMR3, PTPN14, PTPRF	543	139	17446	1.38686	1	1	1
GOTERM_BP_DIRECT	GO:0006470~protein dephosphorylation	6	0.840336	0.443554	PPP3CB, DUSP2, PPP3R1, MTMR3, PTPN14, PTPRF	573	138	18082	1.37203	1	1	1
GOTERM_BP_DIRECT	GO:0016311~dephosphorylation	5	0.70028	0.453959	DUSP2, MTMR3, PTPN14, FBP1, PTPRF	573	109	18082	1.44756	1	1	1
UP_SEQ_FEATURE	active site:Phosphocysteine intermediate	4	0.560224	0.49199	DUSP2, MTMR3, PTPN14, PTPRF	565	84	18012	1.51808	1	1	1
GOTERM_MF_DIRECT	GO:0016791~phosphatase activity	5	0.70028	0.501383	DUSP2, MTMR3, PTPN14, FBP1, PTPRF	543	118	17446	1.36139	1	1	1
UP_KEYWORDS	Protein phosphatase	5	0.70028	0.524674	PPP3CB, DUSP2, MTMR3, PTPN14, PTPRF	660	130	22680	1.32168	1	1	0.97281
GOTERM_MF_DIRECT	GO:0004725~protein tyrosine phosphatase activity	4	0.560224	0.584025	DUSP2, MTMR3, PTPN14, PTPRF	543	97	17446	1.3249	1	1	1
INTERPRO	IPR000387:Protein-tyrosine/Dual specificity phosphatase	3	0.420168	0.706418	DUSP2, PTPN14, PTPRF	615	82	20594	1.2251	1	1	1
Annotation Cluster 72	Enrichment Score: 0.34355417352074397
Category	Term	Count	%	PValue	Genes	List Total	Pop Hits	Pop Total	Fold Enrichment	Bonferroni	Benjamini	FDR
GOTERM_CC_DIRECT	GO:0005814~centriole	6	0.840336	0.265202	CCDC78, DCTN1, CETN2, CEP19, RAB8A, AURKA	614	111	19662	1.73096	1	1	0.99802
UP_KEYWORDS	Cilium biogenesis/degradation	6	0.840336	0.384632	CCDC78, IFT81, BBS9, CEP97, RAB8A, AURKA	660	140	22680	1.47273	1	1	0.97281
GOTERM_CC_DIRECT	GO:0036064~ciliary basal body	5	0.70028	0.442867	IFT81, CETN2, CEP19, BBS9, RAB8A	614	109	19662	1.46894	1	1	0.99802
GOTERM_BP_DIRECT	GO:0030030~cell projection organization	6	0.840336	0.522352	CCDC78, IFT81, BBS9, CEP97, RAB8A, AURKA	573	151	18082	1.25391	1	1	1
GOTERM_BP_DIRECT	GO:0042384~cilium assembly	5	0.70028	0.586202	ONECUT2, IFT81, BBS9, RABL2, RAB8A	573	129	18082	1.22313	1	1	1
GOTERM_BP_DIRECT	GO:0060271~cilium morphogenesis	6	0.840336	0.627723	ONECUT2, IFT81, AVIL, BBS9, RABL2, RAB8A	573	170	18082	1.11377	1	1	1
Annotation Cluster 73	Enrichment Score: 0.33635621033417273
Category	Term	Count	%	PValue	Genes	List Total	Pop Hits	Pop Total	Fold Enrichment	Bonferroni	Benjamini	FDR
UP_KEYWORDS	Tyrosine-protein kinase	6	0.840336	0.232096	INSR, PTK6, MST1R, BAZ1B, BMX, CLK3	660	113	22680	1.82462	1	1	0.97281
GOTERM_MF_DIRECT	GO:0004713~protein tyrosine kinase activity	6	0.840336	0.323277	INSR, PTK6, MST1R, BAZ1B, BMX, CLK3	543	121	17446	1.59317	1	1	1
GOTERM_BP_DIRECT	GO:0038083~peptidyl-tyrosine autophosphorylation	3	0.420168	0.373896	INSR, PTK6, BMX	573	41	18082	2.30903	1	1	1
GOTERM_MF_DIRECT	GO:0004715~non-membrane spanning protein tyrosine kinase activity	3	0.420168	0.409816	PTK6, BAZ1B, BMX	543	45	17446	2.14193	1	1	1
INTERPRO	IPR020635:Tyrosine-protein kinase, catalytic domain	4	0.560224	0.436031	INSR, PTK6, MST1R, BMX	615	81	20594	1.65364	1	1	1
SMART	SM00219:TyrKc	4	0.560224	0.440733	INSR, PTK6, MST1R, BMX	314	81	10425	1.63954	1	1	1
INTERPRO	IPR008266:Tyrosine-protein kinase, active site	4	0.560224	0.569682	INSR, PTK6, MST1R, BMX	615	99	20594	1.35298	1	1	1
INTERPRO	IPR001245:Serine-threonine/tyrosine-protein kinase catalytic domain	5	0.70028	0.598167	INSR, PTK6, MST1R, ANKK1, BMX	615	139	20594	1.20454	1	1	1
GOTERM_BP_DIRECT	GO:0007169~transmembrane receptor protein tyrosine kinase signaling pathway	4	0.560224	0.617031	DOK1, INSR, PTK6, BMX	573	100	18082	1.26227	1	1	1
GOTERM_BP_DIRECT	GO:0046777~protein autophosphorylation	4	0.560224	0.931967	INSR, PTK6, BMX, CLK3	573	183	18082	0.689764	1	1	1
Annotation Cluster 74	Enrichment Score: 0.3175792307742555
Category	Term	Count	%	PValue	Genes	List Total	Pop Hits	Pop Total	Fold Enrichment	Bonferroni	Benjamini	FDR
GOTERM_BP_DIRECT	GO:0055114~oxidation-reduction process	24	3.36134	0.39194	CYB5A, ACADVL, MRPS36, GSTO1, TET2, UQCR10, ADH5, HIGD2A, CYP2D26, ALKBH5, CYB5R3, LOX, CYP11A1, ASPHD1, ALDH1A2, CAT, NDUFS4, GPD1, AGPS, ALDH16A1, SC5D, PHGDH, DECR2, NOX1	573	676	18082	1.12036	1	1	1
GOTERM_MF_DIRECT	GO:0016491~oxidoreductase activity	21	2.94118	0.418614	ACADVL, GSTO1, TET2, OSGIN1, ADH5, CYP2D26, ALKBH5, CYB5R3, LOX, CYP11A1, ASPHD1, ALDH1A2, CAT, GPD1, AGPS, ALDH16A1, SC5D, PHGDH, DECR2, RDH19, NOX1	543	604	17446	1.11706	1	1	1
UP_KEYWORDS	Oxidoreductase	18	2.52101	0.679561	ACADVL, GSTO1, TET2, LPO, ADH5, CYP2D26, ALKBH5, CYB5R3, LOX, CYP11A1, ASPHD1, ALDH1A2, CAT, GPD1, SC5D, PHGDH, DECR2, NOX1	660	639	22680	0.96799	1	1	0.97281
Annotation Cluster 75	Enrichment Score: 0.31713684757412125
Category	Term	Count	%	PValue	Genes	List Total	Pop Hits	Pop Total	Fold Enrichment	Bonferroni	Benjamini	FDR
INTERPRO	IPR011332:Ribosomal protein, zinc-binding domain	3	0.420168	0.0637348	RPL36AL, RPL37RT, MRPL33	615	14	20594	7.17561	1	1	1
UP_KEYWORDS	Ribonucleoprotein	11	1.54062	0.404956	MRPS27, TERT, RPL31, MRPS36, RPL36AL, SNRPB2, RPL37RT, RPL3L, LSM3, MRPL33, SNRPB	660	308	22680	1.22727	1	1	0.97281
UP_KEYWORDS	Ribosomal protein	7	0.980392	0.540993	MRPS27, RPL31, MRPS36, RPL36AL, RPL37RT, RPL3L, MRPL33	660	203	22680	1.18495	1	1	0.97281
GOTERM_CC_DIRECT	GO:0022625~cytosolic large ribosomal subunit	4	0.560224	0.542919	RPL31, RPL36AL, RPL37RT, RPL3L	614	91	19662	1.4076	1	1	0.99802
GOTERM_CC_DIRECT	GO:0030529~intracellular ribonucleoprotein complex	10	1.40056	0.669919	MRPS27, TERT, RPL31, MRPS36, NUP62, SNRPB2, LRPPRC, LSM3, MRPL33, SNRPB	614	320	19662	1.00071	1	1	0.99802
KEGG_PATHWAY	mmu03010:Ribosome	5	0.70028	0.733847	RPL31, RPL36AL, RPL37RT, RPL3L, MRPL33	263	145	7691	1.00839	1	1	0.983402
GOTERM_MF_DIRECT	GO:0003735~structural constituent of ribosome	7	0.980392	0.832872	RPL31, RPL36AL, SLC25A34, RPL37RT, SLC25A4, RPL3L, MRPL33	543	264	17446	0.851903	1	1	1
GOTERM_CC_DIRECT	GO:0005840~ribosome	4	0.560224	0.935378	MRPS27, RPL31, MRPS36, MRPL33	614	188	19662	0.681336	1	1	0.99802
Annotation Cluster 76	Enrichment Score: 0.30977371400986065
Category	Term	Count	%	PValue	Genes	List Total	Pop Hits	Pop Total	Fold Enrichment	Bonferroni	Benjamini	FDR
UP_KEYWORDS	Developmental protein	32	4.48179	0.320914	SEMA7A, WDR47, SRF, HIST1H1T, LRP5, SIX1, ARHGAP22, ADGRG1, EFNB3, CSRP2, FRZB, AKT2, CDK20, CTNNA2, JAG2, CCBE1, NUS1, DNASE2A, HSPA1L, DCC, ZFR, SIAH1A, SHROOM3, SMAD5, TMEM2, SFRP2, IFT81, TRNP1, MMP19, HOXB3, C77370, INA	660	976	22680	1.12668	1	1	0.97281
UP_KEYWORDS	Differentiation	21	2.94118	0.431447	NUS1, SEMA7A, HSPA1L, SMURF1, HIST1H1T, SIAH1A, PIK3CD, SMAD5, ARHGAP22, CDC42, ALKBH5, ADGRG1, EFNB3, CSRP2, SFRP2, IFT81, FRZB, MMP19, CTNNA2, TCF3, INA	660	646	22680	1.11708	1	1	0.97281
GOTERM_BP_DIRECT	GO:0007275~multicellular organism development	34	4.7619	0.516155	SEMA7A, WDR47, SRF, HIST1H1T, LRP5, SIX1, ARHGAP22, ADGRG1, EFNB3, CSRP2, FRZB, AKT2, CDK20, CTNNA2, JAG2, CCBE1, NUS1, DNASE2A, HSPA1L, GTF2IRD2, DCC, ZFR, SIAH1A, SHROOM3, SMAD5, LENEP, TMEM2, SFRP2, IFT81, TRNP1, MMP19, HOXB3, C77370, INA	573	1029	18082	1.04269	1	1	1
GOTERM_BP_DIRECT	GO:0030154~cell differentiation	22	3.08123	0.80688	JAG2, NUS1, SEMA7A, HSPA1L, SMURF1, HIST1H1T, SIAH1A, PIK3CD, SMAD5, ARHGAP22, CDC42, ALKBH5, ADGRG1, EFNB3, CSRP2, SFRP2, IFT81, FRZB, MMP19, CTNNA2, TCF3, INA	573	780	18082	0.890061	1	1	1
Annotation Cluster 77	Enrichment Score: 0.29756169883564776
Category	Term	Count	%	PValue	Genes	List Total	Pop Hits	Pop Total	Fold Enrichment	Bonferroni	Benjamini	FDR
GOTERM_BP_DIRECT	GO:0098609~cell-cell adhesion	8	1.12045	0.39017	SH3GLB2, TMEM2, KLC2, ELMO2, CTNNA2, ALDOA, ABCF3, CC2D1A	573	189	18082	1.33573	1	1	1
GOTERM_MF_DIRECT	GO:0098641~cadherin binding involved in cell-cell adhesion	10	1.40056	0.500673	SH3GLB2, TMEM2, KLC2, SNX2, RDX, CTNNA2, CCT8, ALDOA, ABCF3, CC2D1A	543	279	17446	1.15157	1	1	1
GOTERM_CC_DIRECT	GO:0005913~cell-cell adherens junction	10	1.40056	0.6554	SH3GLB2, TMEM2, KLC2, SNX2, RDX, CTNNA2, CCT8, ALDOA, ABCF3, CC2D1A	614	316	19662	1.01338	1	1	0.99802
Annotation Cluster 78	Enrichment Score: 0.2827117360056437
Category	Term	Count	%	PValue	Genes	List Total	Pop Hits	Pop Total	Fold Enrichment	Bonferroni	Benjamini	FDR
INTERPRO	IPR001841:Zinc finger, RING-type	12	1.68067	0.232418	RNF214, RNF126, SCAF11, RNF180, VPS8, SIAH1A, CYHR1, BAZ1B, BMI1, MEX3D, MEX3C, RNFT1	615	286	20594	1.40501	1	1	1
UP_SEQ_FEATURE	zinc finger region:RING-type	7	0.980392	0.528529	RNF126, RNF180, SIAH1A, BMI1, MEX3D, MEX3C, RNFT1	565	186	18012	1.19977	1	1	1
INTERPRO	IPR017907:Zinc finger, RING-type, conserved site	5	0.70028	0.719995	RNF31, SCAF11, RNF180, BMI1, RNFT1	615	163	20594	1.02718	1	1	1
SMART	SM00184:RING	6	0.840336	0.836538	RNF126, RNF180, VPS8, BMI1, MEX3C, RNFT1	314	234	10425	0.851298	1	1	1
Annotation Cluster 79	Enrichment Score: 0.2674904103410966
Category	Term	Count	%	PValue	Genes	List Total	Pop Hits	Pop Total	Fold Enrichment	Bonferroni	Benjamini	FDR
UP_KEYWORDS	Chromosome partition	3	0.420168	0.367074	STAG2, BUB3, REC8	660	44	22680	2.34298	1	1	0.97281
GOTERM_BP_DIRECT	GO:0007059~chromosome segregation	4	0.560224	0.537788	NEK9, STAG2, BUB3, REC8	573	89	18082	1.41828	1	1	1
GOTERM_BP_DIRECT	GO:0051321~meiotic cell cycle	4	0.560224	0.582173	STAG2, BUB3, REC8, AURKA	573	95	18082	1.3287	1	1	1
UP_KEYWORDS	Meiosis	3	0.420168	0.740666	STAG2, BUB3, REC8	660	90	22680	1.14545	1	1	0.97281
Annotation Cluster 80	Enrichment Score: 0.26085207476504335
Category	Term	Count	%	PValue	Genes	List Total	Pop Hits	Pop Total	Fold Enrichment	Bonferroni	Benjamini	FDR
GOTERM_CC_DIRECT	GO:0016020~membrane	245	34.3137	0.0154876	PGAP3, RPL31, GCC1, TXNDC15, EPS8, NDST4, AKT2, ARL6IP5, VPS36, ARRDC4, WDR83OS, ENTPD2, CCDC78, FNBP1, ALG5, HFE2, SCAMP1, SYTL3, MAPK8IP1, TIAM2, ZFYVE16, FNDC4, ASPHD1, KDELR2, ATP5S, MTMR3, TMEM161A, WNK4, VPS26A, MST1R, UBE2J2, XKRX, APOO, PPP3R1, NKAIN4, CYB5R3, SNX2, CHST15, PLCG2, ST8SIA4, GPM6B, ATG5, RTBDN, JAG2, NUS1, TMEM184C, DMPK, ABCA5, XRCC5, SYNRG, INSR, RDX, SURF4, PTK6, ERLIN2,…	614	6998	19662	1.12112	0.999629	0.41246	0.41083
UP_SEQ_FEATURE	transmembrane region	133	18.6275	0.63519	PGAP3, MPV17L, SPPL2A, MPL, ATP12A, TXNDC15, GNPTAB, NDST4, ARL6IP5, WDR83OS, ZGPAT, ENTPD2, MMGT1, SPNS3, SLC30A4, ALG5, ADAM11, DNAJB14, SCAMP1, LEMD3, TMEM251, FNDC4, SLC9A8, MAL, KDELR2, PTPRCAP, SLC27A3, XPR1, TMEM161A, SLC26A1, RNF180, SLC41A3, SLC41A1, MST1R, PSEN1, UBE2J2, XKRX, APOO, NKAIN4, ADGRG1, EFNB3, CHST15, ST8SIA4, GPM6B, LRRC4B, JAG2, NUS1, TMEM184C, ABCA5, LHFP, INSR, SURF4, ER…	565	4312	18012	0.983301	1	1	1
UP_KEYWORDS	Membrane	239	33.4734	0.885875	PGAP3, GCC1, TXNDC15, EPS8, NDST4, AKT2, ARL6IP5, VPS36, ARRDC4, WDR83OS, CCBE1, ENTPD2, CCDC78, FNBP1, ALG5, OLFR1445, HFE2, SCAMP1, SYTL3, MAPK8IP1, ZFYVE16, FNDC4, SPINT1, ASPHD1, KDELR2, ATP5S, MTMR3, TMEM161A, VPS26A, MST1R, UBE2J2, XKRX, APOO, PPP3R1, NKAIN4, CYB5R3, SNX2, CHST15, ST8SIA4, GPM6B, ATG5, RTBDN, JAG2, NUS1, TMEM184C, DMPK, ABCA5, RNASE10, SYNRG, INSR, RDX, SURF4, PTK6, ERLIN2,…	660	8683	22680	0.945861	1	1	0.97281
UP_SEQ_FEATURE	topological domain:Cytoplasmic	78	10.9244	0.947163	GLP1R, PGAP3, MPV17L, SPPL2A, SLC2A1, MPL, NAGPA, ATP12A, TXNDC15, PTPRF, SPN, MFSD8, ATP7B, SERP1, LRRTM3, SGCB, NDST4, ARL6IP5, FFAR3, EMB, HGSNAT, MAMDC4, ZGPAT, ENTPD2, DCC, MMGT1, NFAM1, SLC30A4, ALG5, ADAM11, UPK3B, SCAMP1, SLC39A14, TAPBP, LMBRD1, FNDC4, MAL, ITGA7, KDELR2, TLR7, B4GALT7, XPR1, SLC47A2, TMEM161A, ASAH2, STX16, H2-DMA, LRP5, MST1R, PSEN1, UBE2J2, ADGRG1, EFNB3, CHST15, ST8S…	565	2880	18012	0.863407	1	1	1
UP_KEYWORDS	Transmembrane	173	24.2297	0.99605	PGAP3, PROS1, MPV17L, PCDH11X, SPPL2A, MUM1, MPL, ATP12A, TXNDC15, GM14085, GNPTAB, NDST4, ARL6IP5, WDR83OS, CCBE1, OLFR1284, ENTPD2, KCNH6, MMGT1, SPNS3, SLC30A4, ALG5, ADAM11, OLFR1445, DNAJB14, SCAMP1, LEMD3, TMEM251, PIAS2, CYP2D26, FNDC4, SPINT1, VMN1R219, ASPHD1, OLFR430, SLC9A8, MAL, KDELR2, PTPRCAP, SLC27A3, XPR1, TMEM161A, SLC26A1, RNF180, SLC41A3, SLC41A1, MST1R, ZFP60, PSEN1, UBE2J2, X…	660	6955	22680	0.854768	1	1	0.99605
UP_KEYWORDS	Transmembrane helix	171	23.9496	0.997378	PGAP3, PROS1, MPV17L, PCDH11X, SPPL2A, MUM1, MPL, ATP12A, TXNDC15, GM14085, GNPTAB, NDST4, ARL6IP5, WDR83OS, CCBE1, OLFR1284, ENTPD2, KCNH6, MMGT1, SPNS3, SLC30A4, ALG5, ADAM11, OLFR1445, DNAJB14, SCAMP1, LEMD3, TMEM251, PIAS2, CYP2D26, FNDC4, SPINT1, VMN1R219, ASPHD1, OLFR430, SLC9A8, MAL, KDELR2, PTPRCAP, SLC27A3, XPR1, TMEM161A, SLC26A1, RNF180, SLC41A3, SLC41A1, MST1R, ZFP60, PSEN1, UBE2J2, X…	660	6938	22680	0.846956	1	1	0.997378
UP_SEQ_FEATURE	topological domain:Extracellular	50	7.0028	0.998606	GLP1R, SLC2A1, MPL, TXNDC15, PTPRF, SPN, MFSD8, ATP7B, SERP1, LRRTM3, SGCB, FFAR3, EMB, MAMDC4, ZGPAT, ENTPD2, DCC, NFAM1, ADAM11, SLC39A14, LMBRD1, FNDC4, MAL, ITGA7, TLR7, XPR1, SLC47A2, TMEM161A, LRP5, MST1R, ADGRG1, EFNB3, HAS2, GPR157, JAG2, NUS1, P2RY13, SLC16A1, IL10RA, INSR, YIF1A, UBAC2, DCBLD2, HIGD2A, MAS1, FAP, BAMBI, ITGA11, SSPN, NOX1	565	2256	18012	0.706552	1	1	1
GOTERM_CC_DIRECT	GO:0016021~integral component of membrane	173	24.2297	0.999913	PGAP3, PROS1, MPV17L, PCDH11X, SPPL2A, MUM1, MPL, ATP12A, TXNDC15, GNPTAB, NDST4, ARL6IP5, WDR83OS, CCBE1, OLFR1284, ENTPD2, KCNH6, MMGT1, SPNS3, SLC30A4, ALG5, ADAM11, OLFR1445, DNAJB14, SCAMP1, LEMD3, TMEM251, PIAS2, CYP2D26, FNDC4, SFRP2, SPINT1, ASPHD1, OLFR430, SLC9A8, MAL, KDELR2, PTPRCAP, SLC27A3, XPR1, TMEM161A, SLC26A1, RNF180, SLC41A3, SLC41A1, MST1R, ZFP60, PSEN1, UBE2J2, XKRX, APOO, N…	614	6878	19662	0.805459	1	1	0.999913
Annotation Cluster 81	Enrichment Score: 0.25586587492446394
Category	Term	Count	%	PValue	Genes	List Total	Pop Hits	Pop Total	Fold Enrichment	Bonferroni	Benjamini	FDR
UP_SEQ_FEATURE	repeat:ANK 1	8	1.12045	0.40076	ANKRD26, CDKN2B, ANKRD27, YTHDC2, CASKIN1, ASAP3, OSBPL1A, ANKK1	565	193	18012	1.32144	1	1	1
UP_SEQ_FEATURE	repeat:ANK 2	8	1.12045	0.40076	ANKRD26, CDKN2B, ANKRD27, YTHDC2, CASKIN1, ASAP3, OSBPL1A, ANKK1	565	193	18012	1.32144	1	1	1
INTERPRO	IPR002110:Ankyrin repeat	8	1.12045	0.532044	ANKRD26, CDKN2B, ANKRD27, YTHDC2, CASKIN1, ASAP3, OSBPL1A, ANKK1	615	232	20594	1.1547	1	1	1
UP_KEYWORDS	ANK repeat	8	1.12045	0.549253	ANKRD26, CDKN2B, ANKRD27, YTHDC2, CASKIN1, ASAP3, OSBPL1A, ANKK1	660	240	22680	1.14545	1	1	0.97281
UP_SEQ_FEATURE	repeat:ANK 3	6	0.840336	0.564854	ANKRD26, CDKN2B, ANKRD27, CASKIN1, OSBPL1A, ANKK1	565	160	18012	1.19549	1	1	1
UP_SEQ_FEATURE	repeat:ANK 4	5	0.70028	0.565686	ANKRD26, CDKN2B, ANKRD27, CASKIN1, ANKK1	565	127	18012	1.2551	1	1	1
INTERPRO	IPR020683:Ankyrin repeat-containing domain	8	1.12045	0.585505	ANKRD26, CDKN2B, ANKRD27, YTHDC2, CASKIN1, ASAP3, OSBPL1A, ANKK1	615	242	20594	1.10698	1	1	1
UP_SEQ_FEATURE	repeat:ANK 5	4	0.560224	0.661797	ANKRD26, ANKRD27, CASKIN1, ANKK1	565	108	18012	1.18073	1	1	1
SMART	SM00248:ANK	7	0.980392	0.67323	ANKRD26, CDKN2B, ANKRD27, CASKIN1, ASAP3, OSBPL1A, ANKK1	314	225	10425	1.03291	1	1	1
UP_SEQ_FEATURE	repeat:ANK 6	3	0.420168	0.706192	ANKRD27, CASKIN1, ANKK1	565	78	18012	1.22614	1	1	1
Annotation Cluster 82	Enrichment Score: 0.25508113044499364
Category	Term	Count	%	PValue	Genes	List Total	Pop Hits	Pop Total	Fold Enrichment	Bonferroni	Benjamini	FDR
SMART	SM00060:FN3	7	0.980392	0.311489	MYBPC1, FSD1L, FNDC4, DCC, INSR, MPL, PTPRF	314	153	10425	1.51898	1	1	1
INTERPRO	IPR003961:Fibronectin, type III	8	1.12045	0.434448	MYBPC1, FSD1L, FNDC4, DCC, INSR, IL10RA, MPL, PTPRF	615	211	20594	1.26962	1	1	1
UP_SEQ_FEATURE	domain:Fibronectin type-III 3	3	0.420168	0.692586	DCC, INSR, PTPRF	565	76	18012	1.25841	1	1	1
UP_SEQ_FEATURE	domain:Fibronectin type-III 2	4	0.560224	0.749848	DCC, INSR, MPL, PTPRF	565	124	18012	1.02838	1	1	1
UP_SEQ_FEATURE	domain:Fibronectin type-III 1	4	0.560224	0.754686	DCC, INSR, MPL, PTPRF	565	125	18012	1.02015	1	1	1
Annotation Cluster 83	Enrichment Score: 0.22867309108342462
Category	Term	Count	%	PValue	Genes	List Total	Pop Hits	Pop Total	Fold Enrichment	Bonferroni	Benjamini	FDR
GOTERM_BP_DIRECT	GO:0007030~Golgi organization	5	0.70028	0.240214	CDC42, RAB2A, SURF4, ARL1, DNAJC28	573	79	18082	1.99726	1	1	1
GOTERM_MF_DIRECT	GO:0019003~GDP binding	4	0.560224	0.285896	RAB2A, SRP54C, GNAI1, RAB8A	543	60	17446	2.14193	1	1	1
GOTERM_MF_DIRECT	GO:0003924~GTPase activity	9	1.2605	0.324417	CDC42, RAB2A, HBS1L, GNA15, ARL1, TSR1, SRP54C, GNAI1, RAB8A	543	209	17446	1.38354	1	1	1
INTERPRO	IPR005225:Small GTP-binding protein domain	6	0.840336	0.548382	CDC42, RAB2A, ARL1, IFT27, RABL2, RAB8A	615	165	20594	1.21768	1	1	1
INTERPRO	IPR001806:Small GTPase superfamily	5	0.70028	0.569156	CDC42, RAB2A, IFT27, RABL2, RAB8A	615	134	20594	1.24948	1	1	1
GOTERM_MF_DIRECT	GO:0005525~GTP binding	12	1.68067	0.647516	CDC42, RAB2A, HBS1L, GNA15, INSR, ARL1, IFT27, TSR1, SRP54C, RABL2, GNAI1, RAB8A	543	383	17446	1.00665	1	1	1
INTERPRO	IPR027417:P-loop containing nucleoside triphosphate hydrolase	26	3.64146	0.690653	DDX28, HBS1L, YTHDC2, ATP5A1, ARL1, GNAI1, CDC42, GNA15, DHX32, NDST4, DHX57, KATNA1, CHST15, SRP54C, ABCF3, MDN1, RAB8A, RAB2A, DYNC1H1, ABCA5, DDX55, MYH2, PSMC4, IFT27, ERCC6, RABL2	615	909	20594	0.9578	1	1	1
UP_KEYWORDS	GTP-binding	9	1.2605	0.752092	CDC42, RAB2A, HBS1L, GNA15, ARL1, IFT27, RABL2, GNAI1, RAB8A	660	332	22680	0.931544	1	1	0.97281
UP_SEQ_FEATURE	short sequence motif:Effector region	3	0.420168	0.825023	CDC42, RAB2A, RAB8A	565	100	18012	0.956389	1	1	1
UP_KEYWORDS	Prenylation	4	0.560224	0.838299	CDC42, RAB2A, CLN3, RAB8A	660	157	22680	0.875507	1	1	0.97281
UP_SEQ_FEATURE	lipid moiety-binding region:S-geranylgeranyl cysteine	3	0.420168	0.863165	CDC42, RAB2A, RAB8A	565	110	18012	0.869445	1	1	1
GOTERM_BP_DIRECT	GO:0007264~small GTPase mediated signal transduction	6	0.840336	0.871166	CDC42, RAB2A, ARL1, IFT27, RABL2, RAB8A	573	236	18082	0.802289	1	1	1
UP_SEQ_FEATURE	nucleotide phosphate-binding region:GTP	8	1.12045	0.875359	CDC42, RAB2A, HBS1L, GNA15, ARL1, IFT27, SRP54C, RAB8A	565	319	18012	0.79949	1	1	1
Annotation Cluster 84	Enrichment Score: 0.2152070047861896
Category	Term	Count	%	PValue	Genes	List Total	Pop Hits	Pop Total	Fold Enrichment	Bonferroni	Benjamini	FDR
INTERPRO	IPR000961:AGC-kinase, C-terminal	3	0.420168	0.47173	DMPK, MAST3, AKT2	615	53	20594	1.89544	1	1	1
UP_SEQ_FEATURE	domain:AGC-kinase C-terminal	3	0.420168	0.517479	DMPK, MAST3, AKT2	565	55	18012	1.73889	1	1	1
GOTERM_BP_DIRECT	GO:0018105~peptidyl-serine phosphorylation	3	0.420168	0.926387	DMPK, MAST3, AKT2	573	133	18082	0.711806	1	1	1
Annotation Cluster 85	Enrichment Score: 0.21308624724145434
Category	Term	Count	%	PValue	Genes	List Total	Pop Hits	Pop Total	Fold Enrichment	Bonferroni	Benjamini	FDR
INTERPRO	IPR024079:Metallopeptidase, catalytic domain	4	0.560224	0.555799	ECEL1, ADAM11, MMP19, ADAMTS6	615	97	20594	1.38087	1	1	1
GOTERM_MF_DIRECT	GO:0008237~metallopeptidase activity	6	0.840336	0.557847	AGBL5, ECEL1, ADAM11, DPEP2, MMP19, DPP3	543	160	17446	1.20483	1	1	1
GOTERM_MF_DIRECT	GO:0004222~metalloendopeptidase activity	4	0.560224	0.740132	ECEL1, ADAM11, MMP19, ADAMTS6	543	123	17446	1.04484	1	1	1
Annotation Cluster 86	Enrichment Score: 0.21146320010971323
Category	Term	Count	%	PValue	Genes	List Total	Pop Hits	Pop Total	Fold Enrichment	Bonferroni	Benjamini	FDR
GOTERM_MF_DIRECT	GO:0004175~endopeptidase activity	7	0.980392	0.135869	PSMA1, FAP, CMA1, PSEN1, PCSK6, ELANE, PSMB9	543	112	17446	2.00806	1	1	1
GOTERM_MF_DIRECT	GO:0004252~serine-type endopeptidase activity	6	0.840336	0.791915	FAP, CMA1, PRSS37, MMP19, PCSK6, ELANE	543	212	17446	0.909309	1	1	1
UP_KEYWORDS	Serine protease	4	0.560224	0.882198	FAP, CMA1, PCSK6, ELANE	660	173	22680	0.794535	1	1	0.97281
UP_SEQ_FEATURE	active site:Charge relay system	4	0.560224	0.957457	FAP, ABHD17A, CMA1, ELANE	565	205	18012	0.622042	1	1	1
GOTERM_MF_DIRECT	GO:0008236~serine-type peptidase activity	3	0.420168	0.964273	FAP, CMA1, ELANE	543	163	17446	0.59133	1	1	1
Annotation Cluster 87	Enrichment Score: 0.2050736148896623
Category	Term	Count	%	PValue	Genes	List Total	Pop Hits	Pop Total	Fold Enrichment	Bonferroni	Benjamini	FDR
GOTERM_MF_DIRECT	GO:0008237~metallopeptidase activity	6	0.840336	0.557847	AGBL5, ECEL1, ADAM11, DPEP2, MMP19, DPP3	543	160	17446	1.20483	1	1	1
UP_KEYWORDS	Metalloprotease	5	0.70028	0.600099	AGBL5, ECEL1, DPEP2, MMP19, DPP3	660	143	22680	1.20153	1	1	0.97281
UP_SEQ_FEATURE	metal ion-binding site:Zinc; catalytic	4	0.560224	0.724505	APOBEC1, ECEL1, MMP19, DPP3	565	119	18012	1.07158	1	1	1
Annotation Cluster 88	Enrichment Score: 0.18622020598971287
Category	Term	Count	%	PValue	Genes	List Total	Pop Hits	Pop Total	Fold Enrichment	Bonferroni	Benjamini	FDR
UP_SEQ_FEATURE	nucleotide phosphate-binding region:FAD	3	0.420168	0.555451	ACADVL, CYB5R3, NOX1	565	59	18012	1.621	1	1	1
GOTERM_MF_DIRECT	GO:0050660~flavin adenine dinucleotide binding	3	0.420168	0.659583	ACADVL, CYB5R3, AGPS	543	72	17446	1.3387	1	1	1
UP_KEYWORDS	FAD	4	0.560224	0.670475	ACADVL, CYB5R3, AGPS, NOX1	660	118	22680	1.16487	1	1	0.97281
UP_KEYWORDS	Flavoprotein	4	0.560224	0.732523	ACADVL, CYB5R3, AGPS, NOX1	660	130	22680	1.05734	1	1	0.97281
Annotation Cluster 89	Enrichment Score: 0.15572013562637832
Category	Term	Count	%	PValue	Genes	List Total	Pop Hits	Pop Total	Fold Enrichment	Bonferroni	Benjamini	FDR
GOTERM_CC_DIRECT	GO:0000786~nucleosome	5	0.70028	0.435913	HIST1H2AO, KAT6A, HIST1H1T, HIST1H2BA, HIST1H2AB	614	108	19662	1.48254	1	1	0.99802
KEGG_PATHWAY	mmu05322:Systemic lupus erythematosus	6	0.840336	0.565593	HIST1H2AO, H2-DMA, HIST1H2BA, ELANE, HIST1H2AB, SNRPB	263	147	7691	1.19361	1	1	0.983402
INTERPRO	IPR007125:Histone core	3	0.420168	0.693497	HIST1H2AO, HIST1H2BA, HIST1H2AB	615	80	20594	1.25573	1	1	1
UP_KEYWORDS	Nucleosome core	3	0.420168	0.791418	HIST1H2AO, HIST1H2BA, HIST1H2AB	660	100	22680	1.03091	1	1	0.97281
INTERPRO	IPR009072:Histone-fold	3	0.420168	0.885244	HIST1H2AO, HIST1H2BA, HIST1H2AB	615	123	20594	0.816736	1	1	1
KEGG_PATHWAY	mmu05034:Alcoholism	4	0.560224	0.971097	HIST1H2AO, HIST1H2BA, GNAI1, HIST1H2AB	263	202	7691	0.579076	1	1	0.983402
Annotation Cluster 90	Enrichment Score: 0.14671343006581275
Category	Term	Count	%	PValue	Genes	List Total	Pop Hits	Pop Total	Fold Enrichment	Bonferroni	Benjamini	FDR
INTERPRO	IPR013098:Immunoglobulin I-set	8	1.12045	0.150464	MYBPC1, DCC, PALLD, ADGRF5, LRIG2, EMB, PTPRF, LRRC4B	615	147	20594	1.82238	1	1	1
UP_SEQ_FEATURE	domain:Ig-like C2-type 3	4	0.560224	0.523208	DCC, PALLD, LRIG2, PTPRF	565	88	18012	1.44907	1	1	1
INTERPRO	IPR003598:Immunoglobulin subtype 2	7	0.980392	0.731497	MYBPC1, DCC, PALLD, ADGRF5, LRIG2, PTPRF, LRRC4B	615	242	20594	0.968608	1	1	1
SMART	SM00408:IGc2	7	0.980392	0.739143	MYBPC1, DCC, PALLD, ADGRF5, LRIG2, PTPRF, LRRC4B	314	242	10425	0.960349	1	1	1
UP_SEQ_FEATURE	domain:Ig-like C2-type 1	4	0.560224	0.786473	DCC, PALLD, LRIG2, PTPRF	565	132	18012	0.96605	1	1	1
UP_SEQ_FEATURE	domain:Ig-like C2-type 2	4	0.560224	0.790724	DCC, PALLD, LRIG2, PTPRF	565	133	18012	0.958786	1	1	1
UP_KEYWORDS	Immunoglobulin domain	10	1.40056	0.941797	SEMA7A, DCC, PALLD, NFAM1, ADGRF5, LRIG2, EMB, PTPRF, LRRC4B, TAPBP	660	481	22680	0.714421	1	1	0.97281
INTERPRO	IPR003599:Immunoglobulin subtype	9	1.2605	0.987919	MYBPC1, DCC, PALLD, ADGRF5, LRIG2, EMB, SIGLECH, PTPRF, LRRC4B	615	518	20594	0.581806	1	1	1
SMART	SM00409:IG	9	1.2605	0.989436	MYBPC1, DCC, PALLD, ADGRF5, LRIG2, EMB, SIGLECH, PTPRF, LRRC4B	314	518	10425	0.576845	1	1	1
INTERPRO	IPR013783:Immunoglobulin-like fold	19	2.66106	0.998675	SEMA7A, MYBPC1, DCC, INSR, H2-DMA, IL10RA, MPL, MST1R, SIGLECH, PTPRF, TAPBP, VPREB3, FSD1L, FNDC4, PALLD, ADGRF5, LRIG2, EMB, LRRC4B	615	1099	20594	0.578924	1	1	1
INTERPRO	IPR007110:Immunoglobulin-like domain	13	1.82073	0.99978	SEMA7A, MYBPC1, DCC, H2-DMA, SIGLECH, PTPRF, TAPBP, VPREB3, PALLD, ADGRF5, LRIG2, EMB, LRRC4B	615	920	20594	0.473174	1	1	1
Annotation Cluster 91	Enrichment Score: 0.1294470925726103
Category	Term	Count	%	PValue	Genes	List Total	Pop Hits	Pop Total	Fold Enrichment	Bonferroni	Benjamini	FDR
UP_KEYWORDS	Glycoprotein	117	16.3866	0.307102	PGAP3, PROS1, SPPL2A, MPL, TXNDC15, POFUT2, GNPTAB, NDST4, AKT2, MYC, CCBE1, ENTPD2, ALG5, ADAM11, HFE2, PDIA4, FNDC4, LOX, SPINT1, DPEP2, SEMA7A, TMEM161A, SLC26A1, MST1R, NID1, LYPD6, APOO, ADGRG1, EFNB3, CHST15, ST8SIA4, ELANE, GPM6B, LRRC4B, JAG2, NUS1, DNASE2A, ABCA5, RNASE10, INSR, LY86, INHBB, ERLIN2, UBAC2, BAMBI, ITGA11, NOX1, ITM2C, GLP1R, PRKCSH, SLC2A1, LAMC2, NAGPA, ORM3, MSLN, PTPRF…	660	3815	22680	1.05388	1	1	0.97281
UP_SEQ_FEATURE	signal peptide	93	13.0252	0.760665	GLP1R, PGAP3, PRKCSH, PROS1, MPL, LAMC2, SSC4D, NAGPA, ORM3, MSLN, TXNDC15, PTPRF, SPN, SERPINA1B, POFUT2, SERPINA1C, LRRTM3, EAR1, EMB, PDIA3, CCBE1, CD52, MAMDC4, AHSG, DCC, MMGT1, NFAM1, ADAM11, HFE2, UPK3B, SLC39A14, 1190002N15RIK, ASPN, PDIA4, TAPBP, FNDC4, SFRP2, LOX, SPINT1, MZB1, DPEP2, ITGA7, MMP19, TLR7, PPIB, SEMA7A, CCL12, TMEM161A, PLA2G1B, H2-DMA, LRP5, TM2D3, MST1R, NID1, HSPA13, L…	565	3124	18012	0.949042	1	1	1
UP_KEYWORDS	Disulfide bond	83	11.6246	0.856723	GLP1R, PROS1, LAMC2, SSC4D, NAGPA, ORM3, MSLN, PTPRF, CHCHD5, POFUT2, GNPTAB, SGCB, AKT2, NDST4, NUP62, FFAR3, EAR1, EMB, PRL2C1, ADAMTS6, PDIA3, CCBE1, HGSNAT, MAMDC4, ENTPD2, AHSG, DCC, NFAM1, ADAM11, HFE2, ASPN, PDIA4, TRDN, TAPBP, SFRP2, LOX, SPINT1, PALLD, ADGRF5, MZB1, DPEP2, ITGA7, MMP19, SEMA7A, CCL12, PLA2G1B, H2-DMA, GLO1, LRP5, MST1R, NID1, THBS4, NT5E, EFNB3, CNPY4, FRZB, CHADL, RNASE…	660	3124	22680	0.91299	1	1	0.97281
UP_KEYWORDS	Signal	120	16.8067	0.910137	PGAP3, PROS1, PCDH11X, SPPL2A, MUM1, MPL, SSC4D, TXNDC15, VPREB3, POFUT2, PRL2C1, PDIA3, CCBE1, ENTPD2, ADAM11, HFE2, PDIA4, FNDC4, SFRP2, LOX, SPINT1, DPEP2, PTPRCAP, PPIB, SLC27A3, SEMA7A, TMEM161A, LPO, MST1R, NID1, OAZ1, LYPD6, APOO, NKAIN4, ADGRG1, EFNB3, PENK, ST8SIA4, WFDC18, RDH19, ELANE, LRRC4B, RTBDN, JAG2, CDSN, DNASE2A, RNASE10, XRCC5, LHFP, INSR, LY86, INHBB, ERLIN2, MEX3C, UBAC2, BA…	660	4543	22680	0.90769	1	1	0.97281
UP_SEQ_FEATURE	glycosylation site:N-linked (GlcNAc...)	100	14.0056	0.921313	PGAP3, PROS1, MPL, TXNDC15, POFUT2, GNPTAB, NDST4, CCBE1, ENTPD2, ALG5, ADAM11, HFE2, PDIA4, FNDC4, LOX, SPINT1, DPEP2, SEMA7A, TMEM161A, SLC26A1, MST1R, NID1, LYPD6, ADGRG1, EFNB3, CHST15, ST8SIA4, ELANE, GPM6B, LRRC4B, RTBDN, JAG2, DNASE2A, ABCA5, RNASE10, INSR, LY86, INHBB, ERLIN2, UBAC2, BAMBI, ITGA11, NOX1, ITM2C, GLP1R, PRKCSH, SLC2A1, LAMC2, NAGPA, ORM3, MSLN, PTPRF, SPN, SERPINA1B, SERPIN…	565	3563	18012	0.894742	1	1	1
UP_SEQ_FEATURE	disulfide bond	59	8.26331	0.996522	GLP1R, PROS1, LAMC2, SSC4D, NAGPA, ORM3, PTPRF, GNPTAB, SGCB, NDST4, EAR1, EMB, PDIA3, CCBE1, MAMDC4, AHSG, DCC, NFAM1, ADAM11, ASPN, PDIA4, TAPBP, SFRP2, SPINT1, PALLD, DPEP2, ITGA7, MMP19, SEMA7A, CCL12, PLA2G1B, H2-DMA, LRP5, NID1, THBS4, EFNB3, CNPY4, FRZB, RNASE9, PENK, ST8SIA4, LRIG2, ELANE, CD55, LRRC4B, RTBDN, JAG2, P2RY13, DNASE2A, CMA1, IL10RA, INSR, PRSS37, INHBB, DCBLD2, SMOC2, FAP, I…	565	2510	18012	0.749362	1	1	1
Annotation Cluster 92	Enrichment Score: 0.10729753467033704
Category	Term	Count	%	PValue	Genes	List Total	Pop Hits	Pop Total	Fold Enrichment	Bonferroni	Benjamini	FDR
UP_SEQ_FEATURE	DNA-binding region:Homeobox	6	0.840336	0.668445	BARHL1, ONECUT2, HOXB3, SIX1, ADNP2, POU2F2	565	180	18012	1.06265	1	1	1
UP_KEYWORDS	Homeobox	8	1.12045	0.708207	BARHL1, TGIF2LX1, ONECUT2, HOXB3, SIX1, ADNP2, HIPK1, POU2F2	660	280	22680	0.981818	1	1	0.97281
INTERPRO	IPR017970:Homeobox, conserved site	5	0.70028	0.802233	BARHL1, TGIF2LX1, HOXB3, SIX1, POU2F2	615	184	20594	0.909951	1	1	1
SMART	SM00389:HOX	7	0.980392	0.815214	BARHL1, TGIF2LX1, ONECUT2, HOXB3, SIX1, ADNP2, POU2F2	314	266	10425	0.873701	1	1	1
INTERPRO	IPR001356:Homeodomain	7	0.980392	0.821886	BARHL1, TGIF2LX1, ONECUT2, HOXB3, SIX1, ADNP2, POU2F2	615	271	20594	0.864957	1	1	1
INTERPRO	IPR009057:Homeodomain-like	8	1.12045	0.892494	BARHL1, TGIF2LX1, ONECUT2, 0610010K14RIK, HOXB3, SIX1, ADNP2, POU2F2	615	345	20594	0.776491	1	1	1
Annotation Cluster 93	Enrichment Score: 0.0760958416454293
Category	Term	Count	%	PValue	Genes	List Total	Pop Hits	Pop Total	Fold Enrichment	Bonferroni	Benjamini	FDR
UP_SEQ_FEATURE	signal peptide	93	13.0252	0.760665	GLP1R, PGAP3, PRKCSH, PROS1, MPL, LAMC2, SSC4D, NAGPA, ORM3, MSLN, TXNDC15, PTPRF, SPN, SERPINA1B, POFUT2, SERPINA1C, LRRTM3, EAR1, EMB, PDIA3, CCBE1, CD52, MAMDC4, AHSG, DCC, MMGT1, NFAM1, ADAM11, HFE2, UPK3B, SLC39A14, 1190002N15RIK, ASPN, PDIA4, TAPBP, FNDC4, SFRP2, LOX, SPINT1, MZB1, DPEP2, ITGA7, MMP19, TLR7, PPIB, SEMA7A, CCL12, TMEM161A, PLA2G1B, H2-DMA, LRP5, TM2D3, MST1R, NID1, HSPA13, L…	565	3124	18012	0.949042	1	1	1
UP_KEYWORDS	Secreted	45	6.30252	0.792961	CCL12, PLA2G1B, PROS1, IL1F8, LAMC2, SSC4D, NID1, ORM3, MSLN, SOGA1, LYPD6, THBS4, SERPINA1B, SERPINA1C, ADGRG1, CNPY4, RNASE9, FRZB, CHADL, C1QBP, PENK, S100A13, WFDC18, PRL2C1, RTBDN, CCBE1, CDSN, RNASE10, CMA1, AHSG, PRSS37, LY86, INHBB, 1190002N15RIK, ASPN, AGT, SMOC2, SFRP2, FAP, LOX, SPINT1, ABHD17A, MZB1, MMP19, INHA	660	1685	22680	0.917723	1	1	0.97281
GOTERM_CC_DIRECT	GO:0005615~extracellular space	40	5.60224	0.905109	CSTB, CCL12, PLA2G1B, PROS1, IL1F8, PRKAG2, LAMC2, LPO, ORM3, MSLN, PCSK6, SOGA1, THBS4, SPN, VPREB3, SERPINA1B, SERPINB1A, SERPINA1C, FRZB, C1QBP, S100A13, ELANE, PDIA3, CCBE1, AHSG, RDX, LY86, INHBB, HFE2, 1190002N15RIK, AGT, SFRP2, LRG1, FAP, LOX, SPINT1, CAT, INHA, ALDOA, INA	614	1504	19662	0.85167	1	1	0.99802
GOTERM_CC_DIRECT	GO:0005576~extracellular region	47	6.58263	0.908805	CCL12, PLA2G1B, PROS1, IL1F8, LAMC2, SSC4D, NID1, MSLN, PCSK6, SOGA1, LYPD6, THBS4, SERPINA1B, APOO, SERPINA1C, ADGRG1, PNP, CNPY4, RNASE9, FRZB, CHADL, C1QBP, PENK, S100A13, WFDC18, PRL2C1, PDIA3, RTBDN, CCBE1, CDSN, RNASE10, CMA1, AHSG, PRSS37, LY86, INHBB, 1190002N15RIK, ASPN, SMOC2, SFRP2, FAP, LOX, SPINT1, ABHD17A, MZB1, MMP19, INHA	614	1753	19662	0.858569	1	1	0.99802
Annotation Cluster 94	Enrichment Score: 0.04331371204971229
Category	Term	Count	%	PValue	Genes	List Total	Pop Hits	Pop Total	Fold Enrichment	Bonferroni	Benjamini	FDR
GOTERM_MF_DIRECT	GO:0004252~serine-type endopeptidase activity	6	0.840336	0.791915	FAP, CMA1, PRSS37, MMP19, PCSK6, ELANE	543	212	17446	0.909309	1	1	1
UP_SEQ_FEATURE	domain:Peptidase S1	3	0.420168	0.876168	CMA1, PRSS37, ELANE	565	114	18012	0.838938	1	1	1
SMART	SM00020:Tryp_SPc	3	0.420168	0.953453	CMA1, PRSS37, ELANE	314	158	10425	0.630392	1	1	1
INTERPRO	IPR001254:Peptidase S1	3	0.420168	0.953926	CMA1, PRSS37, ELANE	615	160	20594	0.627866	1	1	1
INTERPRO	IPR009003:Trypsin-like cysteine/serine peptidase domain	3	0.420168	0.962391	CMA1, PRSS37, ELANE	615	168	20594	0.597967	1	1	1
Annotation Cluster 95	Enrichment Score: 0.04080310590170844
Category	Term	Count	%	PValue	Genes	List Total	Pop Hits	Pop Total	Fold Enrichment	Bonferroni	Benjamini	FDR
INTERPRO	IPR013026:Tetratricopeptide repeat-containing domain	3	0.420168	0.87671	KLC2, TTC32, PPID	615	120	20594	0.837154	1	1	1
SMART	SM00028:TPR	3	0.420168	0.876969	KLC2, TTC32, PPID	314	119	10425	0.836991	1	1	1
INTERPRO	IPR019734:Tetratricopeptide repeat	3	0.420168	0.893228	KLC2, TTC32, PPID	615	126	20594	0.79729	1	1	1
UP_SEQ_FEATURE	repeat:TPR 3	3	0.420168	0.906274	KLC2, TTC32, PPID	565	125	18012	0.765112	1	1	1
UP_KEYWORDS	TPR repeat	3	0.420168	0.924604	KLC2, TTC32, PPID	660	144	22680	0.715909	1	1	0.97281
UP_SEQ_FEATURE	repeat:TPR 1	3	0.420168	0.931242	KLC2, TTC32, PPID	565	137	18012	0.698094	1	1	1
UP_SEQ_FEATURE	repeat:TPR 2	3	0.420168	0.931242	KLC2, TTC32, PPID	565	137	18012	0.698094	1	1	1
INTERPRO	IPR011990:Tetratricopeptide-like helical	4	0.560224	0.945001	KLC2, TTC32, COPE, PPID	615	204	20594	0.656592	1	1	1
Annotation Cluster 96	Enrichment Score: 0.03442619978716022
Category	Term	Count	%	PValue	Genes	List Total	Pop Hits	Pop Total	Fold Enrichment	Bonferroni	Benjamini	FDR
UP_KEYWORDS	Postsynaptic cell membrane	4	0.560224	0.889138	LRRTM3, SSPN, LIN7B, CPEB4	660	176	22680	0.780992	1	1	0.97281
UP_KEYWORDS	Synapse	8	1.12045	0.896991	EPS8, PCLO, LRRTM3, SSPN, EMB, LIN7B, LRRC4B, CPEB4	660	357	22680	0.770053	1	1	0.97281
GOTERM_CC_DIRECT	GO:0045202~synapse	12	1.68067	0.919562	EPS8, PCLO, ZMYND19, LRRTM3, INSR, SSPN, EMB, SCAMP1, LIN7B, LRRC4B, CPEB4, MAPK8IP1	614	505	19662	0.760938	1	1	0.99802
GOTERM_CC_DIRECT	GO:0045211~postsynaptic membrane	3	0.420168	0.993018	LRRTM3, SSPN, LIN7B	614	222	19662	0.432741	1	1	0.99802
Annotation Cluster 97	Enrichment Score: 0.016334166400213908
Category	Term	Count	%	PValue	Genes	List Total	Pop Hits	Pop Total	Fold Enrichment	Bonferroni	Benjamini	FDR
UP_KEYWORDS	S-adenosyl-L-methionine	3	0.420168	0.946284	CARM1, MRM1, WHSC1L1	660	158	22680	0.652474	1	1	0.97281
UP_KEYWORDS	Methyltransferase	3	0.420168	0.965546	CARM1, MRM1, WHSC1L1	660	176	22680	0.585744	1	1	0.97281
GOTERM_MF_DIRECT	GO:0008168~methyltransferase activity	3	0.420168	0.968741	CARM1, MRM1, WHSC1L1	543	168	17446	0.573731	1	1	1
GOTERM_BP_DIRECT	GO:0032259~methylation	3	0.420168	0.971988	CARM1, MRM1, WHSC1L1	573	169	18082	0.560178	1	1	1
Annotation Cluster 98	Enrichment Score: 0.01240455136859026
Category	Term	Count	%	PValue	Genes	List Total	Pop Hits	Pop Total	Fold Enrichment	Bonferroni	Benjamini	FDR
UP_SEQ_FEATURE	zinc finger region:C2H2-type 4	5	0.70028	0.90805	ZBTB6, BCL11B, ADNP2, ZFP60, IKZF2	565	215	18012	0.741387	1	1	1
UP_SEQ_FEATURE	zinc finger region:C2H2-type 6	3	0.420168	0.953666	BCL11B, ZFP60, IKZF2	565	152	18012	0.629204	1	1	1
UP_SEQ_FEATURE	zinc finger region:C2H2-type 3	5	0.70028	0.965302	ZBTB6, BCL11B, ADNP2, ZFP60, IKZF2	565	261	18012	0.610721	1	1	1
UP_SEQ_FEATURE	zinc finger region:C2H2-type 1	5	0.70028	0.966802	ZBTB6, BCL11B, ADNP2, ZFP60, IKZF2	565	263	18012	0.606077	1	1	1
UP_SEQ_FEATURE	zinc finger region:C2H2-type 2	5	0.70028	0.970292	ZBTB6, BCL11B, ADNP2, ZFP60, IKZF2	565	268	18012	0.59477	1	1	1
INTERPRO	IPR007087:Zinc finger, C2H2	15	2.10084	0.973351	ZFP612, ZFP358, ZFP729A, CIZ1, BCL11B, ZFP704, ZFP866, ZBTB37, ZFR, ZFP60, IKZF2, ZBTB6, ZFP385B, ADNP2, ZFP772	615	731	20594	0.687131	1	1	1
INTERPRO	IPR015880:Zinc finger, C2H2-like	14	1.96078	0.974807	ZFP612, ZFP358, ZFP729A, CIZ1, BCL11B, ZFP866, ZBTB37, ZFR, ZFP60, IKZF2, ZBTB6, ZFP385B, ADNP2, ZFP772	615	693	20594	0.676488	1	1	1
SMART	SM00355:ZnF_C2H2	14	1.96078	0.978259	ZFP612, ZFP358, ZFP729A, CIZ1, BCL11B, ZFP866, ZBTB37, ZFR, ZFP60, IKZF2, ZBTB6, ZFP385B, ADNP2, ZFP772	314	693	10425	0.67072	1	1	1
UP_SEQ_FEATURE	zinc finger region:C2H2-type 5	3	0.420168	0.985185	BCL11B, ZFP60, IKZF2	565	194	18012	0.492984	1	1	1
SMART	SM00349:KRAB	5	0.70028	0.996052	ZFP612, ZFP729A, ZFP866, ZFP60, ZFP772	314	367	10425	0.452325	1	1	1
INTERPRO	IPR001909:Krueppel-associated box	5	0.70028	0.996143	ZFP612, ZFP729A, ZFP866, ZFP60, ZFP772	615	373	20594	0.448876	1	1	1
INTERPRO	IPR013087:Zinc finger C2H2-type/integrase DNA-binding domain	10	1.40056	0.997638	ZFP612, ZFP358, ZFP729A, ZBTB6, BCL11B, ZFP866, ZBTB37, ZFP60, IKZF2, ZFP772	615	652	20594	0.513592	1	1	1
Annotation Cluster 99	Enrichment Score: 0.010759585749479368
Category	Term	Count	%	PValue	Genes	List Total	Pop Hits	Pop Total	Fold Enrichment	Bonferroni	Benjamini	FDR
UP_SEQ_FEATURE	repeat:3	3	0.420168	0.951141	KHSRP, ITGA7, SRSF7	565	150	18012	0.637593	1	1	1
UP_SEQ_FEATURE	repeat:1	3	0.420168	0.987455	KHSRP, ITGA7, SRSF7	565	200	18012	0.478195	1	1	1
UP_SEQ_FEATURE	repeat:2	3	0.420168	0.98846	KHSRP, ITGA7, SRSF7	565	203	18012	0.471128	1	1	1
Annotation Cluster 100	Enrichment Score: 0.003748869278554034
Category	Term	Count	%	PValue	Genes	List Total	Pop Hits	Pop Total	Fold Enrichment	Bonferroni	Benjamini	FDR
SMART	SM00225:BTB	3	0.420168	0.990442	ZBTB6, ZBTB37, KCTD13	314	218	10425	0.456889	1	1	1
INTERPRO	IPR000210:BTB/POZ-like	3	0.420168	0.99081	ZBTB6, ZBTB37, KCTD13	615	222	20594	0.452516	1	1	1
INTERPRO	IPR011333:BTB/POZ fold	3	0.420168	0.992964	ZBTB6, ZBTB37, KCTD13	615	232	20594	0.433011	1	1	1
Annotation Cluster 101	Enrichment Score: 1.9010769196902078E-5
Category	Term	Count	%	PValue	Genes	List Total	Pop Hits	Pop Total	Fold Enrichment	Bonferroni	Benjamini	FDR
GOTERM_MF_DIRECT	GO:0005549~odorant binding	4	0.560224	0.999389	OLFR1131, OLFR1445, OLFR914, OLFR1014	543	372	17446	0.345472	1	1	1
GOTERM_BP_DIRECT	GO:0007186~G-protein coupled receptor signaling pathway	26	3.64146	0.999999	RGS18, GLP1R, CCL12, OLFR1131, OLFR1115, GNAI1, OLFR1014, GNA15, ADGRG1, RIC8B, OLFR586, OLFR223, FFAR3, GPR157, P2RY13, OLFR1284, ENTPD2, INSR, OLFR1445, AGT, OLFR914, OLFR1366, MAS1, OLFR612, OLFR430, ADGRF5	573	1706	18082	0.480935	1	1	1
UP_KEYWORDS	Olfaction	11	1.54062	1	OLFR1284, OLFR612, OLFR1131, OLFR430, OLFR223, OLFR586, OLFR1115, OLFR1445, OLFR914, OLFR1014, OLFR1366	660	1158	22680	0.326425	1	1	1
INTERPRO	IPR000725:Olfactory receptor	11	1.54062	1	OLFR1284, OLFR612, OLFR1131, OLFR430, OLFR223, OLFR586, OLFR1115, OLFR1445, OLFR914, OLFR1014, OLFR1366	615	1149	20594	0.320581	1	1	1
UP_KEYWORDS	Receptor	39	5.46218	1	GLP1R, OLFR1131, MPL, LRP5, OLFR1115, MST1R, PTPRF, OLFR1014, PGRMC1, ADGRG1, OLFR586, OLFR223, FFAR3, GPR157, P2RY13, NUS1, OLFR1284, DCC, INSR, IL10RA, NCOA4, OLFR1445, BMX, OLFR914, OLFR1366, MAS1, OLFR612, NR4A3, NR5A2, VMN1R219, OLFR430, VMN2R88, ITGA11, RARA, ITGA7, KDELR2, TLR7, PTPRCAP, XPR1	660	2613	22680	0.51289	1	1	1
GOTERM_MF_DIRECT	GO:0004984~olfactory receptor activity	11	1.54062	1	OLFR1284, OLFR612, OLFR1131, OLFR430, OLFR223, OLFR586, OLFR1115, OLFR1445, OLFR914, OLFR1014, OLFR1366	543	1154	17446	0.306255	1	1	1
UP_KEYWORDS	Transducer	21	2.94118	1	GLP1R, P2RY13, OLFR1284, OLFR1131, OLFR1445, OLFR1115, GNAI1, OLFR914, OLFR1014, OLFR1366, MAS1, ADGRG1, GNA15, OLFR612, OLFR430, OLFR586, OLFR223, VMN2R88, PLCG2, FFAR3, GPR157	660	1801	22680	0.400686	1	1	1
GOTERM_BP_DIRECT	GO:0007608~sensory perception of smell	11	1.54062	1	OLFR1284, OLFR612, OLFR1131, OLFR430, OLFR223, OLFR586, OLFR1115, OLFR1445, OLFR914, OLFR1014, OLFR1366	573	1143	18082	0.303695	1	1	1
UP_KEYWORDS	Sensory transduction	12	1.68067	1	OLFR1284, RCVRN, OLFR612, OLFR1131, OLFR430, OLFR223, OLFR586, OLFR1115, OLFR1445, OLFR914, OLFR1014, OLFR1366	660	1320	22680	0.312397	1	1	1
KEGG_PATHWAY	mmu04740:Olfactory transduction	11	1.54062	1	OLFR1284, OLFR612, OLFR1131, OLFR430, OLFR223, OLFR586, OLFR1115, OLFR1445, OLFR914, OLFR1014, OLFR1366	263	1080	7691	0.297849	1	1	1
GOTERM_MF_DIRECT	GO:0004930~G-protein coupled receptor activity	21	2.94118	1	GLP1R, P2RY13, OLFR1284, OLFR1131, OLFR1445, OLFR1115, OLFR914, OLFR1014, OLFR1366, MAS1, ADGRG1, OLFR612, SFRP2, OLFR430, FRZB, OLFR586, OLFR223, VMN2R88, ADGRF5, FFAR3, GPR157	543	1749	17446	0.385767	1	1	1
INTERPRO	IPR000276:G protein-coupled receptor, rhodopsin-like	14	1.96078	1	P2RY13, OLFR1284, OLFR1131, OLFR1445, OLFR1115, OLFR914, OLFR1014, OLFR1366, MAS1, OLFR612, OLFR430, OLFR586, OLFR223, FFAR3	615	1458	20594	0.321541	1	1	1
UP_KEYWORDS	G-protein coupled receptor	18	2.52101	1	GLP1R, P2RY13, OLFR1284, OLFR1131, OLFR1445, OLFR1115, OLFR914, OLFR1014, OLFR1366, MAS1, ADGRG1, OLFR612, OLFR430, OLFR586, OLFR223, VMN2R88, FFAR3, GPR157	660	1741	22680	0.355282	1	1	1
INTERPRO	IPR017452:GPCR, rhodopsin-like, 7TM	15	2.10084	1	P2RY13, OLFR1284, OLFR1131, OLFR1445, OLFR1115, OLFR914, OLFR1014, OLFR1366, MAS1, OLFR612, OLFR430, OLFR586, OLFR223, FFAR3, GPR157	615	1708	20594	0.294082	1	1	1
