# Supplementary material for: Monoamine Oxidase-Dependent Pro-Survival Signaling in Diabetic Hearts Is Mediated by miRNAs
Source: Cells. 2022 Aug 30;11(17):2697. doi: 10.3390/cells11172697 (PMC9454570; doi:10.3390/cells11172697)
Supplement: Supplementary file 1 [file cells-11-02697-s001.zip › 7.Restored-cluster with-pargylin-Supplementary Table S7.xlsx]

## Sheet: Restored-expr with-pargylin-1
Original row	SystematicName	Diab+parg-24	Diab+parg-22	Diab+parg-19	Ctrl+parg-10	Ctrl+parg-8	Ctrl+parg-6	Diab-18	Diab-12	Diab-11	Ctrl-5	Ctrl-4	Ctrl-13
2	mmu-let-7b-5p	0.866361	0.817956	0.613474	0.864896	0.976996	0.894995	1.0826	1.01317	1.18437	1.5114	1.12149	1.05229
3	mmu-let-7c-5p	0.886076	0.820717	0.541314	0.909346	1.05983	0.90096	1.08707	1.13755	1.31157	1.32227	1.05725	0.966034
16	mmu-miR-133a-3p	0.901509	0.905298	0.645168	1.04059	0.942331	1.00046	0.995265	1.19105	1.14117	1.0855	1.07781	1.07384
60	mmu-miR-99a-5p	0.996724	0.879468	0.756905	1.04248	0.979749	0.991354	1.06234	1.07867	1.11777	1.0819	1.04454	0.968102
13	mmu-miR-125b-5p	1.02018	0.981751	0.683395	0.902238	1.04182	1.01188	1.24522	1.05245	1.16198	1.02729	0.935644	0.936154
15	mmu-miR-130a-3p	1.02385	0.912527	0.726583	0.954747	0.955858	0.965179	1.09345	1.30432	1.14963	0.84639	0.828121	1.23934
9	mmu-miR-100-5p	0.97369	0.795231	0.638516	0.996763	1.04841	0.971212	1.01826	1.39785	1.13863	1.02435	0.719127	1.27796
30	mmu-miR-19b-3p	1.12064	1.00945	0.591967	0.919364	0.962968	0.899409	1.14344	1.43206	1.34177	0.781604	0.755758	1.04157
43	mmu-miR-34a-5p	0.96144	0.745435	0.572153	1.00907	0.990535	1.06005	1.26251	1.35102	1.26001	0.846856	0.778079	1.16284
25	mmu-miR-185-5p	0.949727	0.784608	0.721544	0.831714	0.820858	0.853996	1.07044	1.44818	1.35136	0.971003	0.920379	1.27619
11	mmu-miR-106b-5p	0.729373	0.724225	0.746864	0.913574	0.871705	0.92046	1.13222	1.48787	1.30789	0.815134	0.867442	1.48325
10	mmu-miR-103-3p	0.866645	0.727798	0.631164	0.895319	1.01355	0.960447	1.13638	1.51787	1.36533	0.830264	0.852376	1.20286
12	mmu-miR-107-3p	0.961755	0.718665	0.557523	1.03904	1.06852	0.949119	1.11245	1.6493	1.44802	0.703985	0.724987	1.06663
20	mmu-miR-151-5p	0.85405	0.569708	0.551197	0.877865	1.01493	0.898746	1.3176	1.70083	1.45002	0.854044	0.755248	1.15577
18	mmu-miR-148a-3p	0.971042	0.737673	0.538238	1.05155	1.03811	0.95398	1.22856	1.62175	1.49009	0.570426	0.555168	1.24342
59	mmu-miR-92a-3p	0.959326	0.686897	0.646325	0.874573	0.681003	0.894145	1.18976	1.45828	2.13692	0.49153	1.09038	0.890859
46	mmu-miR-378a-5p	0.98892	0.769566	0.724245	0.714037	0.804728	0.881146	1.35983	1.62657	1.47303	0.761809	0.711447	1.18467
68	mmu-miR-192-5p	0.149699	0.208637	0.371854	0.204185	0.19748	0.168626	3.78647	2.85922	0.403462	1.59461	1.45418	0.601564
70	mmu-miR-194-5p	0.197339	0.269205	0.243789	0.220142	0.188021	0.329497	3.882	2.98509	0.530977	1.21981	1.31032	0.623815
76	mmu-miR-301a-3p	0.186395	0.248127	0.251454	0.243709	0.265961	0.239684	4.00567	2.88891	0.398307	1.29354	1.34756	0.630681
69	mmu-miR-193a-3p	0.189332	0.224027	0.254567	0.211962	0.252841	0.299096	4.22301	2.76466	0.450223	1.22105	1.32007	0.589166
71	mmu-miR-19a-3p	0.247113	0.397999	0.14264	0.29201	0.224842	0.620235	4.4696	2.67631	0.875673	0.614729	0.955745	0.48311
62	mmu-miR-128-3p	0.224981	0.122462	0.164338	0.384389	0.677768	0.604493	4.54266	2.63838	0.767398	0.535502	0.947781	0.389847
75	mmu-miR-29c-5p	0.325663	0.151325	0.156101	0.338859	0.280305	0.570081	4.45415	2.91423	0.436892	0.748853	1.0842	0.539338
67	mmu-miR-1839-3p	0.276429	0.298011	0.201732	0.245296	0.42891	0.153414	4.7159	2.29857	0.904228	0.804365	1.15416	0.518981
61	mmu-miR-10a-5p	0.212623	0.202745	0.112869	0.590124	0.89955	0.626095	4.92875	2.27418	0.681386	0.371211	0.75991	0.340558
73	mmu-miR-20b-5p	0.238434	0.482473	0.10928	0.367526	0.628833	0.602155	4.99267	2.12868	0.964036	0.379461	0.746107	0.360344
63	mmu-miR-140-5p	0.258898	0.450362	0.0906277	0.398619	0.766128	0.730631	5.2001	1.98066	0.799563	0.32135	0.670906	0.33216
79	mmu-miR-350-3p	0.213577	0.363775	0.0992304	0.51541	0.992236	0.60951	5.23312	1.91457	0.792088	0.307979	0.659427	0.29907
81	mmu-miR-486a-3p	0.249288	0.175449	0.221536	0.308843	0.339972	0.253927	4.43676	2.68838	0.845705	0.810548	1.17805	0.491543
84	mmu-miR-98-5p	0.16577	0.409916	0.0612139	0.966814	1.51296	0.953245	4.25196	1.82893	0.850685	0.204399	0.52073	0.273376
64	mmu-miR-142a-5p	0.127329	0.119624	0.075003	0.634119	0.745491	1.12247	1.35071	4.48206	0.76722	0.699963	1.08511	0.790902
65	mmu-miR-155-5p	0.085355	0.185392	0.13481	0.332612	0.502051	0.358854	1.15862	4.79018	1.13144	1.15539	1.40485	0.760428
78	mmu-miR-338-3p	0.108	0.23866	0.135417	0.345125	0.311682	0.278406	0.98249	4.95955	0.858859	1.35565	1.49651	0.929652
80	mmu-miR-466h-3p	0.0593539	0.130379	0.139062	0.385458	1.00626	0.546572	1.17528	4.58471	0.777832	1.1225	1.3359	0.736698
85	mmu-miR-10b-5p	0.466016	0.26059	0.52808	0.286168	0.992223	0.00221406	2.72558	3.13383	0.646527	1.293	0.981687	0.684079
116	mmu-miR-193b-3p	0.488511	0.483443	1.85849	0.278686	0.00206551	0.00203042	1.73448	2.85465	1.36008	1.6226	0.463294	0.851671

## Sheet: Restored-exp-with-pargylin-2
Original row	Original row	SystematicName	GroupA mean	GroupA std.dev.	GroupB mean	GroupB std.dev.	Absolute t value	Degrees of freedom	Raw p value	Adj p value	False Discovery Rate	Diab+parg-24	Diab+parg-22	Diab+parg-19	Ctrl+parg-10	Ctrl+parg-8	Ctrl+parg-6	Diab-18	Diab-12	Diab-11	Ctrl-5	Ctrl-4	Ctrl-13
98	86	mmu-miR-29a-3p	9.33673	0.179314	9.02768	0.108744	2.55257	3	0	0	0	0.908104	1.02152	1.16424	0.77106	0.822073	0.896032	1.03279	1.0056	1.15727	1.07274	1.11654	1.03203
97	81	mmu-miR-26a-5p	8.63949	0.143489	8.22764	0.0651085	4.52714	2	0	0	0	0.943589	1.11606	1.12557	0.755167	0.818617	0.814299	0.995043	0.873825	0.996058	1.15194	1.22324	1.18659
101	99	mmu-miR-30e-5p	8.26166	0.305105	7.87484	0.0975633	2.09163	2	0	0	0	0.93482	1.07914	1.41755	0.865949	0.803429	0.919534	0.960059	0.773917	0.8532	1.13641	1.18056	1.07544
100	97	mmu-miR-30d-5p	7.41486	0.307668	6.79063	0.198741	2.95186	3	0	0	0	0.973039	1.08211	1.46745	0.659049	0.738447	0.866956	0.980625	0.851696	0.881514	1.14374	1.24397	1.11141
120	55	mmu-miR-1895	4.52919	0.262718	5.05813	0.104933	3.23845	2	0	0	0	0.703585	0.846548	1.48787	0.770304	0.825068	0.752117	0.727487	0.993658	1.00075	1.3007	1.20198	1.38994
141	151	mmu-miR-6931-5p	3.58611	0.712681	4.46983	0.390321	1.88371	3	0	0	0	0.730486	1.03701	1.86853	0.758118	0.680505	0.7179	0.401053	0.811315	1.03918	1.10914	1.75654	1.09021
149	171	mmu-miR-7082-5p	3.69309	0.693954	4.50313	0.38799	1.76471	3	0	0	0	0.765331	0.890312	1.53108	0.83499	0.773457	0.779513	0.430242	0.923781	1.04584	1.10213	1.7839	1.13943
103	118	mmu-miR-378a-3p	8.04854	0.457798	7.40896	0.15054	2.29872	2	0	0	0	0.804436	1.10874	1.51743	0.633315	0.727469	0.776958	1.01427	0.723782	0.787179	1.38476	1.34763	1.17403
104	120	mmu-miR-378b	8.41966	0.438717	7.72489	0.106271	2.66584	2	0	0	0	0.913859	1.15656	1.67079	0.728274	0.704769	0.811315	0.936734	0.739242	0.720344	1.17604	1.27747	1.1646
99	94	mmu-miR-30a-5p	8.78851	0.50395	8.07524	0.115256	2.38976	2	0	0	0	0.834991	1.08468	1.66775	0.66694	0.669644	0.767433	0.980713	0.70933	0.766296	1.26385	1.38004	1.20833
105	122	mmu-miR-378d	8.90792	0.467082	8.07131	0.112492	3.01613	2	0	0	0	0.886834	1.25376	1.69364	0.650812	0.672826	0.755062	0.937111	0.720866	0.735944	1.19841	1.30187	1.19286
