# Supplementary material for: Monoamine Oxidase-Dependent Pro-Survival Signaling in Diabetic Hearts Is Mediated by miRNAs
Source: Cells. 2022 Aug 30;11(17):2697. doi: 10.3390/cells11172697 (PMC9454570; doi:10.3390/cells11172697)
Supplement: Supplementary file 1 [file cells-11-02697-s001.zip › 8.bar_table_WP-BP_q0.01p0.005_padj_Supplementary Table S8.xlsx]

## Sheet: bar_table_WP-BP_cluster 1
pathway_o	pathway	pval	padj	overlap	size	overlapGenes
WP_Insulin_Signaling%WP65	WP_Insulin_Signaling%WP65	3.95178e-19	5.49298e-17	25	159	JUN;SNAP25;MAP2K2;IGF1R;INPP4A;SNAP23;PIK3CA;PIK3CD;CBLB;MAP3K8;SORBS1;FLOT2;MAPK4;MAP3K7;GRB10;MAP4K4;CRK;PIK3R3;RPS6KA2;RPS6KA1;MINK1;GSK3B;RAF1;MAPK12;SLC2A4
WP_EGFR1_Signaling_Pathway%WP572	WP_EGFR1_Signaling_Pathway%WP572	7.71825e-17	5.36418e-15	24	178	JUN;WNK1;MAP2K2;PIK3CA;PIK3CD;CBLB;ASAP1;WASL;STAT3;STAT1;VAV3;GJA1;CTNND1;CAV1;CREB1;HTT;GRB10;EPS15;CRK;PIK3R3;RALBP1;RPS6KA2;RPS6KA1;RAF1
WP_Regulation_of_Actin_Cytoskeleton%WP523	WP_Regulation_of_Actin_Cytoskeleton%WP523	3.45123e-15	1.59907e-13	21	151	MAP2K2;MSN;SSH2;SSH1;ARHGEF7;PIK3CA;LIMK1;PIK3CD;ITGA1;ARHGEF6;MAPK4;APC;MYLK;PAK2;IQGAP1;CRK;WASF2;PIK3R3;ARPC5;PTK2;RAF1
BP_actin_cytoskeleton_organization%0030036	BP_actin_cytoskeleton_organization%0030036	3.5178e-16	6.78583e-13	24	190	ABLIM3;ACTR2;ARFIP2;ARHGEF18;ATXN3;CDC42BPA;CORO1C;CORO2B;CRK;CSRP1;FLNB;PIK3CA;SDAD1;SSH1;SSH2;TAOK2;WASF2;WASL;ACTN4;LIMK1;SPTAN1;DMD;UTRN;SPTBN1
BP_endocytosis%0006897	BP_endocytosis%0006897	4.66188e-15	4.49638e-12	23	192	AAK1;ANK2;ANKFY1;AP2A2;CAV1;CLCN5;DNM1L;DNM2;DNM3;FCHSD2;FKBP15;FNBP1L;MICALL1;MYO6;PSTPIP1;RABEP2;RALBP1;SGIP1;SYNRG;WASF2;NCKIPSD;ITSN1;EPS15
BP_small_GTPase_mediated_signal_transduction%0007264	BP_small_GTPase_mediated_signal_transduction%0007264	5.72407e-14	3.68058e-11	17	101	ARHGAP31;ARHGEF18;ARHGEF7;ARHGEF9;DOCK4;DOCK9;ITSN1;RALBP1;RALGPS1;RALGPS2;RAPGEF2;RAPGEF4;RAPGEF5;RGL2;RHOT1;USO1;VAV3
WP_Focal_Adhesion%WP85	WP_Focal_Adhesion%WP85	1.94386e-12	6.7549e-11	20	185	JUN;MAP2K2;BCL2;ITGA6;PIK3CA;PIK3CD;COL1A2;VEGFA;TLN1;PARVB;CAV1;FLT1;MAPK4;MYLK;PAK2;CRK;GSK3B;PTK2;RAF1;MAPK12
BP_positive_regulation_of_GTPase_activity%0043547	BP_positive_regulation_of_GTPase_activity%0043547	1.68274e-13	7.91179e-11	21	183	ALS2;ARAP3;ARHGEF7;ASAP1;DOCK9;GNAS;GSK3B;ITGA6;KALRN;MAP4K4;MYO9B;PKP4;RALBP1;RALGAPA2;RAPGEF2;RALGPS1;RAPGEF4;RGL2;RASGRP3;RAPGEF5;RALGPS2
BP_neuron_projection_morphogenesis%0048812	BP_neuron_projection_morphogenesis%0048812	2.22609e-13	7.91179e-11	15	78	ALS2;CDK5;DAB2IP;DMD;DNM2;GJA1;ITGA1;KDR;LIFR;PLXNA4;TRIO;MINK1;TNIK;TAOK2;MAP4K4
BP_cytoskeleton_organization%0007010	BP_cytoskeleton_organization%0007010	2.46101e-13	7.91179e-11	17	110	ABLIM3;BRWD1;CDC42BPA;DST;GSK3B;LARP4;MICAL2;MICAL3;PHIP;PRPF40A;PSTPIP2;SS18;SVIL;TNIK;ZNRF1;RANBP10;MAST4
BP_protein_autophosphorylation%0046777	BP_protein_autophosphorylation%0046777	2.87105e-13	7.91179e-11	21	188	AAK1;BRD4;CDK5;CLK4;FES;FLT1;GSK3B;IGF1R;KDR;KIT;MINK1;PAK2;PTK2;SMG1;STK10;STK17B;SYK;TNIK;TRIM24;ULK3;WNK1
WP_Kit_Receptor_Signaling_Pathway%WP407	WP_Kit_Receptor_Signaling_Pathway%WP407	7.85771e-12	1.75943e-10	13	67	KIT;GRB10;SOCS5;CRK;RPS6KA1;CBLB;FES;SPRED2;MPDZ;KITL;RAF1;STAT3;STAT1
WP_IL-6_signaling_Pathway%WP387	WP_IL-6_signaling_Pathway%WP387	8.38785e-12	1.75943e-10	15	99	JUN;MAP2K2;PPP2R5A;CDK5;NCOA1;FES;STAT3;STAT1;MAPT;MAP3K7;RB1;RPS6KA2;GSK3B;PTK2;RAF1
WP_Integrin-mediated_Cell_Adhesion%WP6	WP_Integrin-mediated_Cell_Adhesion%WP6	9.74262e-12	1.75943e-10	15	100	MAP2K2;ARHGEF7;ITGA6;ITGA1;TLN1;VAV3;CAV1;SORBS1;MAPK4;PAK2;CRK;TNS1;PTK2;RAF1;MAPK12
WP_MAPK_signaling_pathway%WP493	WP_MAPK_signaling_pathway%WP493	1.01262e-11	1.75943e-10	18	158	JUN;MAP2K2;STK3;MAP3K8;PPP3R2;TAOK2;MAPT;TRAF6;MAPK4;TRAF2;MAP3K7;PAK2;MAP4K4;CRK;MINK1;RAF1;MAPK12;MAPK8IP3
BP_post-embryonic_development%0009791	BP_post-embryonic_development%0009791	3.24311e-12	7.81996e-10	16	110	ASH1L;BCL2;CCDC47;ERCC2;GIGYF2;GNAQ;GNAS;HEG1;ITPR1;KDM5B;KMT2A;MAPK8IP3;PLEKHA1;PRDM1;SCHIP1;TET2
BP_protein_stabilization%0050821	BP_protein_stabilization%0050821	3.88518e-12	8.32723e-10	20	192	AAK1;ANK2;APBB2;BAG2;CREB1;CTNND1;FLOT2;GNAQ;GOLGA7;LAMP2;MAPK8IP3;NCOR1;PER3;RASSF1;STK3;STX12;TRIM39;TRIM44;UBE2B;ZFP207
BP_axonogenesis%0007409	BP_axonogenesis%0007409	1.74323e-11	3.36269e-09	15	104	ALS2;APC;BCL2;CDK5;CREB1;DST;GSK3B;IGF1R;KALRN;MAPT;NOTCH1;SMN1;STXBP5;TAOK2;ZDHHC17
BP_response_to_xenobiotic_stimulus%0009410	BP_response_to_xenobiotic_stimulus%0009410	2.97434e-11	5.21592e-09	17	147	ABCC1;ADAM17;APOBEC1;BCL2;CFTR;CREB1;GATA6;GNAS;IGF2;JUN;KDR;MYO6;PTPRM;SS18;UBE2B;USP47;VAV3
WP_Alzheimers_Disease%WP2075	WP_Alzheimers_Disease%WP2075	5.31054e-10	8.20184e-09	12	75	MAPT;APAF1;LPL;ITPR2;ITPR1;CACNA1C;CDK5;MME;GSK3B;PPP3R2;ADAM17;GNAQ
WP_IL-2_Signaling_Pathway%WP450	WP_IL-2_Signaling_Pathway%WP450	6.22716e-10	8.65575e-09	12	76	CREB1;MAP2K2;BCL2;CRK;PIK3CA;PIK3CD;RAF1;ETS1;STAT3;STAT1;SYK;STAM2
BP_regulation_of_cell_shape%0008360	BP_regulation_of_cell_shape%0008360	5.65291e-11	9.08705e-09	17	153	ANXA7;ARAP3;ARHGEF18;BRWD1;CRK;FES;KDR;KIT;MKLN1;MSN;MYO10;PRPF40A;PTK2;TAOK2;VEGFA;PLXNA4;PHIP
BP_exocytosis%0006887	BP_exocytosis%0006887	8.62742e-11	1.28018e-08	15	116	ARFGEF2;CDK5;CPLX2;ITSN1;MIA3;MICAL3;NKD2;RAPGEF4;SNAP23;STX3;STXBP5;UNC13B;EXOC6B;SNAP25;EXOC4
WP_ESC_Pluripotency_Pathways%WP339	WP_ESC_Pluripotency_Pathways%WP339	1.03667e-09	1.30997e-08	14	117	JUN;MAP2K2;LIFR;BMPR2;PIK3CD;STAT3;MAPK4;APC;SMAD5;ACTR2;GSK3B;RAF1;MAPK12;FZD4
WP_FAS_pathway_and_Stress_induction_of_HSP_regulation%WP571	WP_FAS_pathway_and_Stress_induction_of_HSP_regulation%WP571	1.55183e-09	1.79754e-08	9	37	RB1;JUN;DFFB;APAF1;CFLAR;MAP3K7;SPTAN1;BCL2;PAK2
BP_transcription,_DNA-templated%0006351	BP_transcription,_DNA-templated%0006351	1.41779e-10	1.95351e-08	14	101	ABLIM3;ASXL2;CBFA2T3;CCNT2;GPBP1L1;JUN;LIN52;NFAT5;POLR1E;SCAI;STAT1;TEAD4;ZBTB7A;DIDO1
BP_regulation_of_GTPase_activity%0043087	BP_regulation_of_GTPase_activity%0043087	1.56189e-10	2.00859e-08	13	84	ALS2;CBLB;CRK;DAB2IP;GPR137B;IQGAP1;RALBP1;RASGRP3;RICTOR;SIPA1L1;VAV3;PLXNA4;ARHGAP12
BP_Ras_protein_signal_transduction%0007265	BP_Ras_protein_signal_transduction%0007265	1.93299e-10	2.33046e-08	12	69	JUN;PLK2;RASGRP3;RASSF1;USP8;RALGPS1;RAPGEF2;RGL2;RERG;RAPGEF5;RAPGEF4;RALGPS2
BP_actin_filament_organization%0007015	BP_actin_filament_organization%0007015	2.06635e-10	2.3447e-08	16	144	ARHGAP12;ARHGAP17;ARHGEF2;BCL2;CTNNA1;CTNNA3;MYO1B;PPP1R9A;RUFY3;SORBS2;WASL;CORO1C;MYO5C;MPRIP;MYO6;MYO1D
BP_cell-cell_adhesion%0098609	BP_cell-cell_adhesion%0098609	3.37947e-10	3.62167e-08	18	195	BCL2;CBLL1;CD34;CD93;CDH11;CDH7;CTNNA3;CTNND1;CXCL12;NEGR1;RPSA;PKP4;LPP;CELSR2;CTNNA1;ITGA6;ITGA1;TLN1
BP_positive_regulation_of_neuron_projection_development%0010976	BP_positive_regulation_of_neuron_projection_development%0010976	3.59963e-10	3.65457e-08	17	172	ADAM17;AHI1;CAMK1D;CFLAR;CREB3L2;DAB2IP;DMD;FES;ITGA6;ITPR1;KIDINS220;MAPT;NCKIPSD;NEGR1;PPP1R9A;RAPGEF2;TRIM67
BP_positive_regulation_of_protein_catabolic_process%0045732	BP_positive_regulation_of_protein_catabolic_process%0045732	5.31054e-10	5.12202e-08	12	75	APC;CBLB;DAB2IP;GGA3;GJA1;GSK3B;NSF;PLK2;SEC22B;TRIM30A;WWP2;NEDD4L
WP_Adipogenesis_genes%WP447	WP_Adipogenesis_genes%WP447	6.20566e-09	6.63528e-08	14	134	BMP1;LIFR;SERPINE1;NCOR1;NCOA1;HMGA1;STAT3;STAT1;NRIP1;PCK2;CREB1;LPL;RB1;SLC2A4
BP_positive_regulation_of_NF-kappaB_transcription_factor_activity%0051092	BP_positive_regulation_of_NF-kappaB_transcription_factor_activity%0051092	7.51038e-10	6.89882e-08	16	157	ARHGEF2;CAV1;CFLAR;FLOT2;IL1RAP;MTDH;NOD1;PTMA;RBCK1;STAT3;TIRAP;TRAF2;TRAF6;TRAPPC9;TRIM30A;ZBTB7A
BP_positive_regulation_of_cold-induced_thermogenesis%0120162	BP_positive_regulation_of_cold-induced_thermogenesis%0120162	1.12299e-09	9.84655e-08	13	98	ADIPOR2;APC;CAV1;EHMT1;ELOVL6;GJA1;GNAS;GRB10;IGF1R;IL4RA;PRDM16;SYK;VEGFA
BP_synaptic_vesicle_endocytosis%0048488	BP_synaptic_vesicle_endocytosis%0048488	1.21933e-09	1.00273e-07	10	49	CDK5;DNM1L;DNM2;DNM3;ITSN1;NAPB;SYNJ1;4932438A13RIK;SYT1;NLGN2
BP_chromatin_remodeling%0006338	BP_chromatin_remodeling%0006338	1.26115e-09	1.00273e-07	15	140	ARID1A;BAZ2A;BRD4;CEBPG;CHD1;CHD8;INO80D;NFRKB;RBBP4;SCMH1;ZBTB7A;CHD2;KDM5B;YEATS2;CHD6
BP_positive_regulation_of_protein_kinase_B_signaling%0051897	BP_positive_regulation_of_protein_kinase_B_signaling%0051897	1.29954e-09	1.00273e-07	14	119	ARFGEF1;CPNE1;CXCL12;IGF1R;IGF2;ITSN1;MTDH;P2RX4;PIK3CA;PIK3CD;PTK2;RICTOR;STK3;VEGFA
BP_microtubule_cytoskeleton_organization%0000226	BP_microtubule_cytoskeleton_organization%0000226	1.39337e-09	1.03378e-07	15	141	ATXN3;CDC42BPA;CLASP1;CLASP2;DST;DYNC1LI2;MAPT;PHLDB2;PTK2;RANBP10;SON;SS18;TACC1;PARD3B;CDC14B
WP_IL-3_Signaling_Pathway%WP373	WP_IL-3_Signaling_Pathway%WP373	1.38829e-08	1.37838e-07	12	99	BCL2;PIK3CA;PIK3CD;FES;STAT3;STAT1;SYK;CREB1;CRK;GSK3B;PTK2;RAF1

## Sheet: bar_table_WP-BP_cluster 2
pathway_o	pathway	pval	padj	overlap	size	overlapGenes
WP_Insulin_Signaling%WP65	WP_Insulin_Signaling%WP65	3.76727e-05	0.0052365	4	159	PRKAA2;CBLB;PRKCA;RPS6KB1
BP_positive_regulation_of_mitotic_cell_cycle%0045931	BP_positive_regulation_of_mitotic_cell_cycle%0045931	1.23377e-05	0.0161394	3	38	MEIS2;PRKCA;RPS6KB1
BP_negative_regulation_of_insulin_receptor_signaling_pathway%0046627	BP_negative_regulation_of_insulin_receptor_signaling_pathway%0046627	1.67334e-05	0.0161394	3	42	PRKCA;PTPN2;RPS6KB1
BP_thymus_development%0048538	BP_thymus_development%0048538	3.78263e-05	0.0243223	3	55	BCL11B;BRAF;SIX4
BP_peptidyl-serine_phosphorylation%0018105	BP_peptidyl-serine_phosphorylation%0018105	5.23134e-05	0.0252281	4	173	PRKCA;RPS6KB1;STK4;HIPK1
WP_Hypothetical_Network_for_Drug_Addiction%WP1246	WP_Hypothetical_Network_for_Drug_Addiction%WP1246	0.000604998	0.0280316	2	31	NISCH;GRM1
WP_Factors_and_pathways_affecting_insulin-like_growth_factor_(IGF1)-Akt_signaling%WP3675	WP_Factors_and_pathways_affecting_insulin-like_growth_factor_(IGF1)-Akt_signaling%WP3675	0.000604998	0.0280316	2	31	RPS6KB1;PRKAB1
WP_EGFR1_Signaling_Pathway%WP572	WP_EGFR1_Signaling_Pathway%WP572	0.00120243	0.0417845	3	178	PRKCA;CBLB;PIK3C2B
BP_positive_regulation_of_autophagy%0010508	BP_positive_regulation_of_autophagy%0010508	0.000120369	0.044454	3	81	MTDH;PRKAA2;DEPDC5
BP_cellular_response_to_nutrient_levels%0031669	BP_cellular_response_to_nutrient_levels%0031669	0.00013827	0.044454	2	15	PRKAA2;PRKAB1
