# Supplementary material for: Monoamine Oxidase-Dependent Pro-Survival Signaling in Diabetic Hearts Is Mediated by miRNAs
Source: Cells. 2022 Aug 30;11(17):2697. doi: 10.3390/cells11172697 (PMC9454570; doi:10.3390/cells11172697)
Supplement: Supplementary file 1 [file cells-11-02697-s001.zip › 9.bar_table_WP-BP_q0.01p0.005_pval_unnamed-Supplementary Table S9.xlsx]

## Sheet: bar_table_WP-BP_q0.01p0.005_pva
pathway_o	pathway	pval	padj	overlap	size	overlapGenes
BP_protein_autophosphorylation%0046777	BP_protein_autophosphorylation%0046777	3.99902e-17	7.7141e-14	22	188	AAK1;BRD4;CDK5;EPHB4;FES;FLT1;FLT4;IGF1R;KDR;KIT;MAP3K12;PDGFRA;PHKA1;PRKD2;PTK2;PTK6;SIK2;SMG1;STK10;TAOK3;TNIK;YES1
WP_Regulation_of_Actin_Cytoskeleton%WP523	WP_Regulation_of_Actin_Cytoskeleton%WP523	3.65261e-12	2.9304e-10	16	151	MSN;SSH2;ARHGEF7;LIMK1;ROCK2;PDGFRA;VCL;PDGFB;DOCK1;RHOA;APC2;MYLK;BRAF;FGF23;ARPC5;PTK2
WP_EGFR1_Signaling_Pathway%WP572	WP_EGFR1_Signaling_Pathway%WP572	4.2164e-12	2.9304e-10	17	178	CAV2;JUN;PTK6;PLEC;PRKCB;EPS8;RALGDS;ASAP1;PLCG1;ITCH;CREB1;GRB10;ARAF;CEACAM1;RPS6KA2;RPS6KA1;ELK1
WP_Focal_Adhesion%WP85	WP_Focal_Adhesion%WP85	7.85318e-12	3.63864e-10	17	185	CAV2;JUN;PTK6;ROCK2;VEGFA;PDGFRA;VCL;PDGFB;DOCK1;RHOA;PARVB;FLT1;MYLK;BRAF;ARAF;PTK2;ELK1
BP_actin_cytoskeleton_organization%0030036	BP_actin_cytoskeleton_organization%0030036	1.13601e-12	1.09568e-09	18	190	ARHGEF17;ARHGEF18;CDC42BPA;CORO1C;NF1;NISCH;PDGFB;PLEC;RHOA;ROCK2;SDAD1;SSH2;TAOK2;TMOD3;ACTN4;LIMK1;SPTBN1;EHBP1
WP_MAPK_signaling_pathway%WP493	WP_MAPK_signaling_pathway%WP493	8.35528e-11	2.90346e-09	15	158	NF1;JUN;PRKCB;MAPK10;PDGFB;PPP3R2;TAOK2;MAPT;TRAF6;TRAF2;BRAF;MAP3K12;MAP4K4;MAPK8IP3;ELK1
BP_positive_regulation_of_angiogenesis%0045766	BP_positive_regulation_of_angiogenesis%0045766	8.09015e-12	5.20196e-09	16	159	ACVRL1;AGO2;BTG1;CCBE1;DDAH1;ETS1;FLT1;KDR;MTDH;NOS3;PLCG1;PRKCB;PRKD2;SERPINE1;STIM1;VEGFA
BP_transmembrane_receptor_protein_tyrosine_kinase_signaling_pathway%0007169	BP_transmembrane_receptor_protein_tyrosine_kinase_signaling_pathway%0007169	1.73736e-11	8.37842e-09	14	118	AHI1;NTRK3;PDGFRA;PTK6;IGF1R;EPHA7;KDR;FLT4;EPHB4;FES;PTK2;YES1;KIT;FLT1
BP_peptidyl-serine_phosphorylation%0018105	BP_peptidyl-serine_phosphorylation%0018105	2.92874e-11	1.12991e-08	16	173	CAB39;CDK5;CSNK1D;MAP3K12;PDGFB;PRKCE;PRKD2;ROCK2;RPS6KA2;SMG1;TLK2;PRKCB;MAST4;CAMK1D;PRKCQ;RPS6KA1
BP_cellular_response_to_transforming_growth_factor_beta_stimulus%0071560	BP_cellular_response_to_transforming_growth_factor_beta_stimulus%0071560	6.64243e-11	2.13554e-08	10	50	ACVRL1;APAF1;DAB2;HYAL2;IGF1R;NOS3;PTK2;SERPINE1;SOX5;YES1
WP_Insulin_Signaling%WP65	WP_Insulin_Signaling%WP65	9.6116e-10	2.67202e-08	14	159	JUN;IGF1R;INPP4A;PRKCB;MAPK10;PRKCQ;SORBS1;GRB10;MAP3K12;MAP4K4;RPS6KA2;RPS6KA1;STXBP4;ELK1
BP_positive_regulation_of_interleukin-2_production%0032743	BP_positive_regulation_of_interleukin-2_production%0032743	1.52357e-10	4.19852e-08	9	39	MALT1;PDE4B;PDE4D;PRKCQ;PRKD2;SPTBN1;TRAF2;TRAF6;VTCN1
BP_chromatin_remodeling%0006338	BP_chromatin_remodeling%0006338	1.77238e-10	4.27366e-08	14	140	ATRX;BAZ2A;BPTF;BRD4;CHD1;INO80D;MIER1;RSF1;SMARCC1;SMARCD2;KDM5A;CHD2;BRD3;CHD6
BP_positive_regulation_of_neuron_projection_development%0010976	BP_positive_regulation_of_neuron_projection_development%0010976	2.78109e-10	5.96081e-08	15	172	AHI1;CAMK1D;CBFA2T2;CFLAR;CREB3L2;DAB2IP;FES;ITPR1;KATNB1;MAPT;NF1;NTRK3;PPP1R9A;PPP2R5D;PTK6
BP_regulation_of_alternative_mRNA_splicing,_via_spliceosome%0000381	BP_regulation_of_alternative_mRNA_splicing,_via_spliceosome%0000381	4.4571e-10	8.59774e-08	10	60	DDX17;FAM172A;NOVA2;PTBP1;RBM25;SRSF6;THRAP3;TIA1;MBNL3;CELF2
BP_regulation_of_small_GTPase_mediated_signal_transduction%0051056	BP_regulation_of_small_GTPase_mediated_signal_transduction%0051056	6.65827e-10	1.08027e-07	7	20	CDC42BPA;RALGAPA1;RALGAPA2;RALGAPB;SIPA1L1;SIPA1L3;ARHGAP28
BP_hematopoietic_progenitor_cell_differentiation%0002244	BP_hematopoietic_progenitor_cell_differentiation%0002244	6.72018e-10	1.08027e-07	12	104	AGPAT5;ARHGEF7;DOCK1;HYAL2;PDGFRA;SIPA1L3;THSD1;TMEM91;KDR;FLT1;FLT4;KIT
WP_Myometrial_Relaxation_and_Contraction_Pathways%WP385	WP_Myometrial_Relaxation_and_Contraction_Pathways%WP385	5.42723e-09	1.14795e-07	13	152	JUN;PRKCB;GABPB1;PRKCE;RGS20;NOS3;PRKCQ;PLCG1;PKIB;PDE4B;CREB1;ITPR1;PDE4D
WP_Integrin-mediated_Cell_Adhesion%WP6	WP_Integrin-mediated_Cell_Adhesion%WP6	5.78104e-09	1.14795e-07	11	100	CAV2;ARHGEF7;ROCK2;VCL;MAPK10;DOCK1;SORBS1;BRAF;ARAF;TNS1;PTK2
BP_positive_regulation_of_JNK_cascade%0046330	BP_positive_regulation_of_JNK_cascade%0046330	8.4021e-10	1.19038e-07	12	106	CEACAM1;DAB2;DAB2IP;FLT4;MAP4K4;MAPK8IP3;PLCB1;TAOK2;TAOK3;TNIK;TRAF2;TRAF6
BP_actin_cytoskeleton_reorganization%0031532	BP_actin_cytoskeleton_reorganization%0031532	8.63934e-10	1.19038e-07	10	64	CDC42BPA;CXADR;EPS8;KIT;PARVB;PLEC;RHOA;SIPA1L1;SMAP1;TNIK
